# Supplementary material for: Expression-based drug screening of neural progenitor cells from individuals with schizophrenia
Source: PubMed Central journal article supplement (PMC6200740; doi:10.1038/s41467-018-06515-4), 2018-10-24
Supplement: 41467_2018_6515_MOESM1_ESM.pdf [file 41467_2018_6515_MOESM1_ESM.pdf]

## **Supplementary Information**

**Expression-based drug screening of neural progenitor cells from individuals with schizophrenia**

Readhead et al

**Phase 1 + Phase 2**  
(8 x L1000 plates per phase)

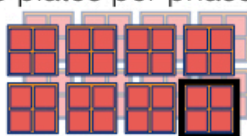

L1000 plate

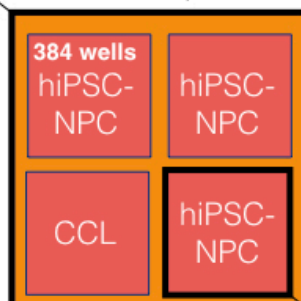

Treatment plate

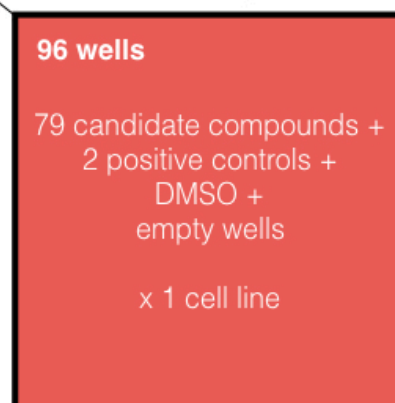

**Supplementary Figure 1. Schematic of tissue culture and L1000 plate design for two phases of drug screening experiments.**

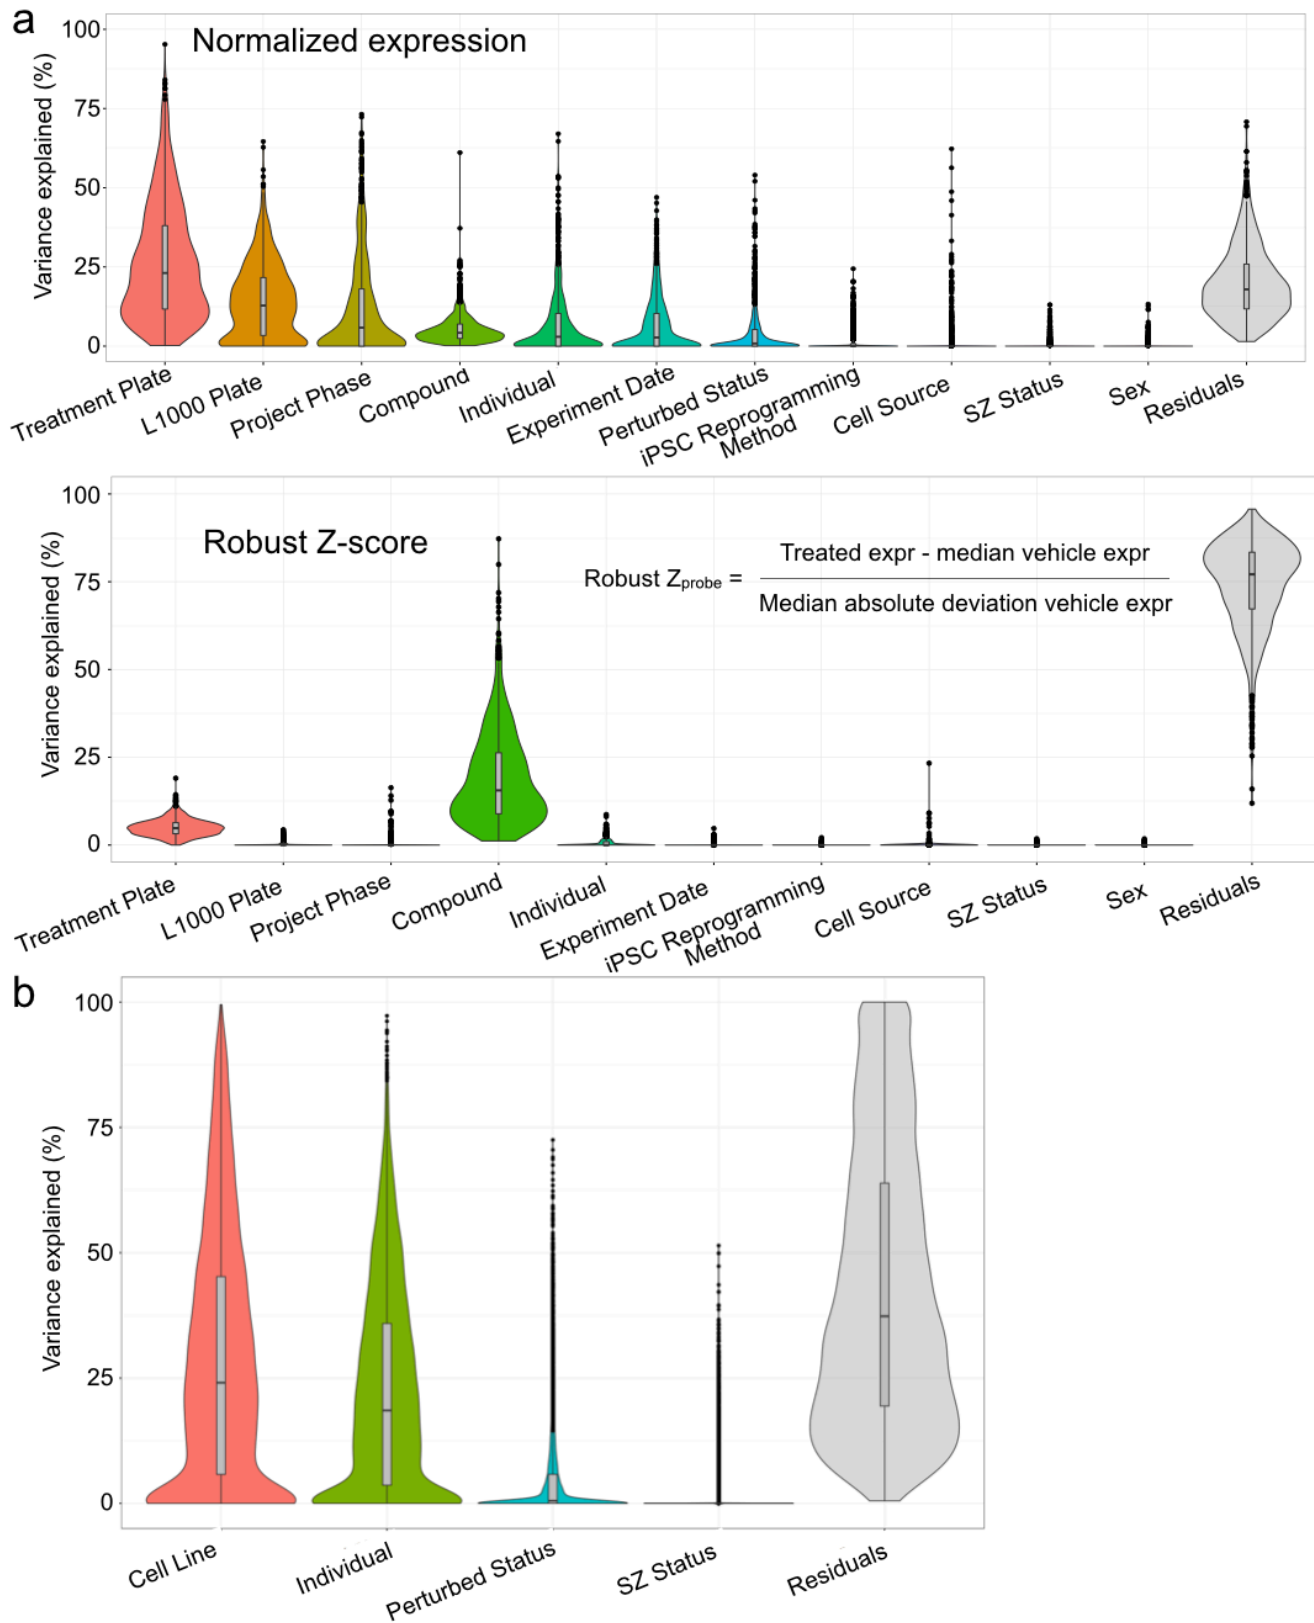

**Supplementary Figure 2. Variance partition of L1000 and RNA-seq transcriptomic data.** (a) Variance partition of L1000 transcriptomic data before (top, normalized gene expression) and after

(bottom, robust Z-score) normalization by comparison with isogenic within-plate DMSO experiments.  
(b) Variance partition RNA-seq transcriptomic data before conversion to isogenic comparisons.

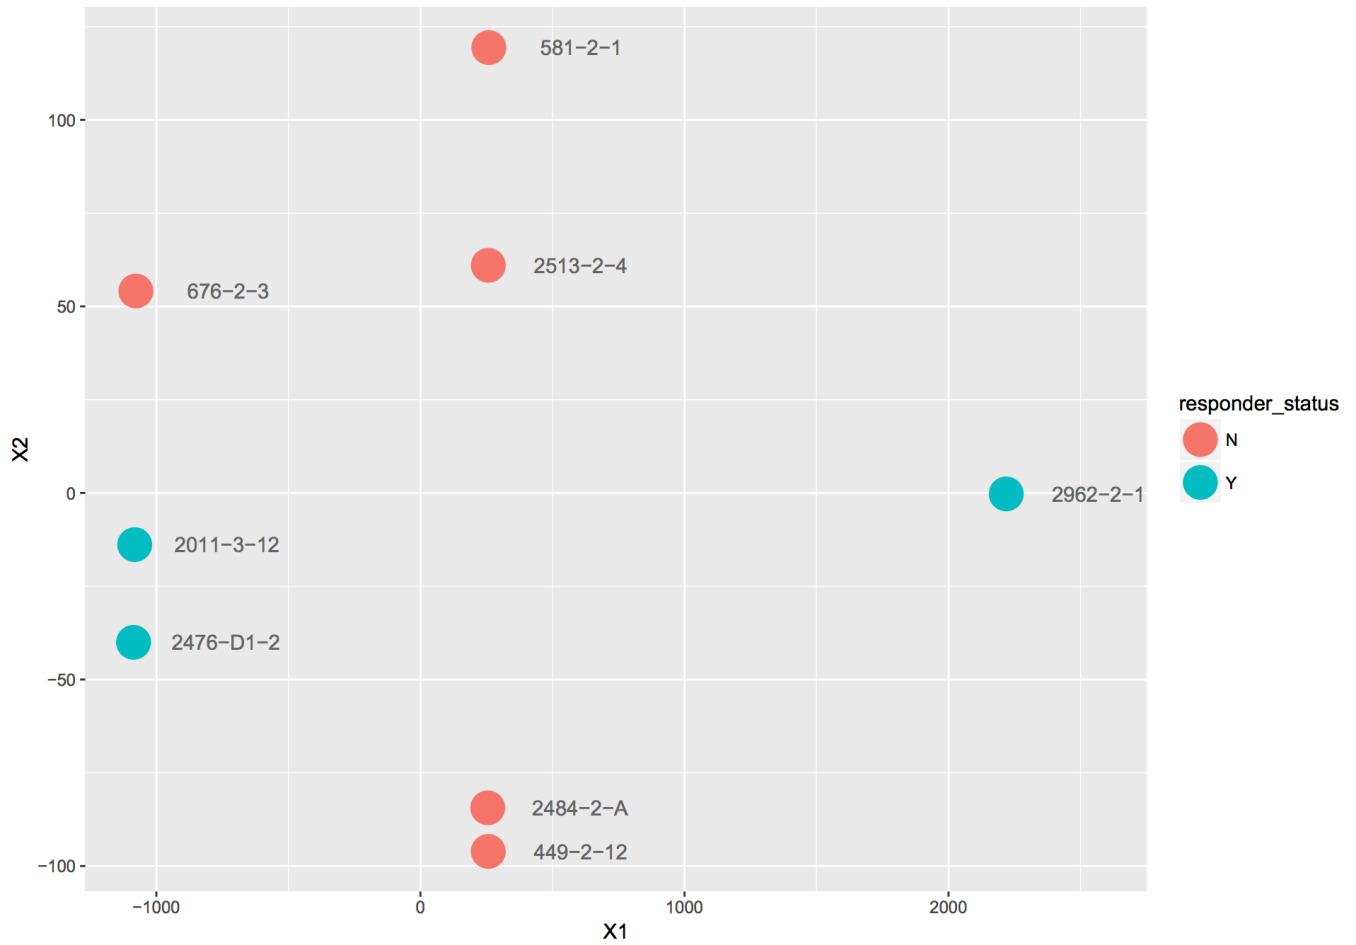

**Supplementary Figure 3. Clozapine induced gene expression among hiPSC NPCs derived from individuals with childhood onset schizophrenia.**

Multidimensional scaling plot of clozapine induced gene expression changes, stratified according to known clozapine response.

### A Frequently perturbed CCL genes

| Probe       | Type | Symbol  | Name                                                                 | # Drugs |
|-------------|------|---------|----------------------------------------------------------------------|---------|
| 207546_at   | INF  | ATP4B   | ATPase, H <sup>+</sup> -K <sup>+</sup> -exchanging, beta polypeptide | 15      |
| 37028_at    | INF  | PPP1R15 | protein phosphatase 1, regulatory subunit 15A                        | 12      |
| 202679_at   | LM   | NPC1    | Niemann-Pick disease, type C1                                        | 12      |
| 204420_at   | LM   | FOSL1   | FOS-like antigen 1                                                   | 12      |
| 213112_s_at | INF  | SQSTM1  | sequestosome 1                                                       | 12      |
| 206519_at   | INF  | AIM2    | absent in melanoma 2                                                 | 12      |
| 205991_s_at | INF  | PRRX1   | paired related homeobox 1                                            | 11      |
| 201466_s_at | LM   | JUN     | jun proto-oncogene                                                   | 11      |
| 205461_s_at | INF  | MT1H    | metallothionein 1H                                                   | 11      |
| 202672_s_at | INF  | ATF3    | activating transcription factor 3                                    | 11      |
| 205281_s_at | INF  | PIGA    | phosphatidylinositol glycan anchor biosynthesis, class A             | 11      |
| 203455_s_at | INF  | SAT1    | spermidine/spermine N1-acetyltransferase 1                           | 11      |
| 205791_s_at | INF  | ZNF230  | zinc finger protein 230                                              | 11      |
| 206989_at   | INF  | DDIT3   | DNA-damage-inducible transcript 3                                    | 10      |
| 201693_s_at | LM   | EGR1    | early growth response 1                                              | 10      |
| 218755_at   | LM   | KIF20A  | kinesin family member 20A                                            | 11      |
| 213599_at   | INF  | OIP5    | Opa interacting protein 5                                            | 11      |
| 201555_at   | LM   | MCM3    | minichromosome maintenance complex component 3                       | 11      |
| 201051_at   | INF  | ANP32A  | acidic (leucine-rich) nuclear phosphoprotein 32 family, member A     | 11      |
| 203160_at   | LM   | SGCNT1  | UDP-GlcNAc:beta-Gal beta-1,3-N-acetylglucosaminyltransferase 1       | 9       |
| 202534_x_at | INF  | DHFR    | dihydrofolate reductase                                              | 9       |
| 212320_at   | INF  | TUBB    | tubulin, beta class I                                                | 9       |
| 201609_x_at | INF  | ICMT    | isoprenylcysteine carboxyl methyltransferase                         | 9       |
| 203871_at   | INF  | SENP3   | SUMO1/Isentris(SMT2) specific peptidase 3                            | 9       |
| 200769_s_at | LM   | MAT2A   | methionine adenosyltransferase II, alpha                             | 9       |
| 201890_at   | INF  | RRM2    | ribonucleotide reductase M2                                          | 9       |
| 211784_s_at | INF  | SRSF1   | serine/arginine-rich splicing factor 1                               | 9       |
| 202330_s_at | INF  | UNG     | uracil-DNA glycosylase                                               | 9       |
| 202705_at   | LM   | CCNB2   | cyclin B2                                                            | 9       |
| 201774_s_at | LM   | NCAPD2  | non-SMC condensin I complex, subunit D2                              | 9       |

### D Frequently perturbed hiPSC NPC genes

| Probe       | Type | Symbol | Name                                                                        | # Drugs |
|-------------|------|--------|-----------------------------------------------------------------------------|---------|
| 202431_s_at | LM   | MYC    | v-myc avian myelocytomatosis viral oncogene homolog                         | 12      |
| 201693_s_at | LM   | EGR1   | early growth response 1                                                     | 11      |
| 37028_at    | INF  | PPP1R1 | protein phosphatase 1, regulatory subunit 15A                               | 11      |
| 201466_s_at | LM   | JUN    | jun proto-oncogene                                                          | 11      |
| 202672_s_at | INF  | ATF3   | activating transcription factor 3                                           | 11      |
| 202130_at   | INF  | RIOK3  | RIO kinase 3                                                                | 11      |
| 202081_at   | INF  | IER2   | immediate early response 2                                                  | 11      |
| 201536_at   | LM   | DUSP3  | dual specificity phosphatase 3                                              | 10      |
| 205249_at   | INF  | EGR2   | early growth response 2                                                     | 10      |
| 202768_at   | INF  | FOSB   | FBJ murine osteosarcoma viral oncogene homolog B                            | 10      |
| 202340_x_at | INF  | NRA41  | nuclear receptor subfamily 4, group A, member 1                             | 10      |
| 202627_s_at | LM   | SERPIN | serpin peptidase inhibitor, clade E (nexin, plasminogen activator inhibitor | 10      |
| 201531_at   | LM   | ZFP36  | ZFP36 ring finger protein                                                   | 10      |
| 204420_at   | LM   | FOSL1  | FOS-like antigen 1                                                          | 10      |
| 212614_at   | LM   | ARID5B | AT rich interactive domain 5B (MRF1-like)                                   | 10      |
| 202954_at   | LM   | UBE2C  | ubiquitin-conjugating enzyme E2C                                            | 12      |
| 203276_at   | INF  | LMBN1  | lamin B1                                                                    | 11      |
| 201051_at   | INF  | ANP32A | acidic (leucine-rich) nuclear phosphoprotein 32 family, member A            | 11      |
| 202743_at   | LM   | PIK3R3 | phosphoinositide-3-kinase, regulatory subunit 3 (gamma)                     | 11      |
| 206102_at   | INF  | GINS1  | GINS complex subunit 1 (Pif1 homolog)                                       | 11      |
| 201972_s_at | INF  | CENPF  | centromeres protein F, 350/400kDa                                           | 11      |
| 210950_s_at | INF  | FDTF1  | farnesyl-diphosphate farnesyltransferase 1                                  | 10      |
| 202580_x_at | INF  | FOXM1  | forkhead box M1                                                             | 10      |
| 212126_at   | INF  | CBX5   | chromobox homolog 5                                                         | 10      |
| 202540_s_at | LM   | HMGCR  | 3-hydroxy-3-methylglutaryl-CoA reductase                                    | 10      |
| 201555_at   | LM   | MCM3   | minichromosome maintenance complex component 3                              | 10      |
| 209218_at   | INF  | SQLE   | squalene epoxidase                                                          | 10      |
| 213599_at   | INF  | OIP5   | Opa interacting protein 5                                                   | 9       |
| 201791_s_at | INF  | DHCR7  | 7-dehydrocholesterol reductase                                              | 9       |
| 202534_x_at | INF  | DHFR   | dihydrofolate reductase                                                     | 9       |

### C Frequently perturbed CCL gene sets

| Hallmark gene set enrichments | Gene Set                  | FDR      | Fold Change |
|-------------------------------|---------------------------|----------|-------------|
| Up                            | TNFA SIGNALING VIA NFKB   | 1.01E-48 | 7.81        |
|                               | HYPOXIA                   | 1.33E-08 | 3.39        |
|                               | P53 PATHWAY               | 1.42E-07 | 3.24        |
|                               | APOPTOSIS                 | 1.54E-05 | 3.09        |
|                               | CHOLESTEROL HOMEOSTASIS   | 8.95E-04 | 3.46        |
|                               | MTORC1 SIGNALING          | 3.96E-03 | 2.05        |
|                               | UV RESPONSE DN            | 7.24E-03 | 2.55        |
| Down                          | INFLAMMATORY RESPONSE     | 1.42E-02 | 2.25        |
|                               | UV RESPONSE UP            | 2.73E-02 | 2.07        |
|                               | TGF BETA SIGNALING        | 3.69E-02 | 3.27        |
|                               | E2F TARGETS               | 7.28E-34 | 9.33        |
|                               | G2M CHECKPOINT            | 5.54E-21 | 6.87        |
|                               | MTORC1 SIGNALING          | 1.35E-09 | 4.54        |
|                               | MYC TARGETS V1            | 1.08E-08 | 4.54        |
| Down                          | MITOTIC SPINDLE           | 3.11E-06 | 3.83        |
|                               | CHOLESTEROL HOMEOSTASIS   | 8.95E-04 | 4.68        |
|                               | UNFOLDED PROTEIN RESPONSE | 2.77E-03 | 3.52        |
|                               | ESTROGEN RESPONSE LATE    | 4.24E-03 | 2.84        |
|                               | GLYCOLYSIS                | 1.27E-02 | 2.84        |
|                               | PEROXISOME                | 1.28E-02 | 3.83        |

### D Frequently perturbed hiPSC NPC gene sets

| Hallmark gene set enrichments | Gene Set                         | FDR     | Fold Change |
|-------------------------------|----------------------------------|---------|-------------|
| Up                            | TNFA SIGNALING VIA NFKB          | 1.4E-23 | 4.86        |
|                               | HYPOXIA                          | 2.8E-07 | 2.88        |
|                               | APOPTOSIS                        | 7.4E-05 | 2.63        |
|                               | <b>UNFOLDED PROTEIN RESPONSE</b> | 1.7E-03 | 2.63        |
|                               | MTORC1 SIGNALING                 | 3.2E-03 | 1.99        |
|                               | UV RESPONSE UP                   | 5.6E-03 | 2.28        |
|                               | P53 PATHWAY                      | 8.8E-03 | 1.98        |
| Down                          | UV RESPONSE DN                   | 5.1E-02 | 1.94        |
|                               | <b>ANDROGEN RESPONSE</b>         | 5.3E-02 | 2.09        |
|                               | TGF BETA SIGNALING               | 8.5E-02 | 2.47        |
|                               | E2F TARGETS                      | 1.6E-49 | 9.69        |
|                               | G2M CHECKPOINT                   | 7.6E-34 | 7.58        |
|                               | MTORC1 SIGNALING                 | 1.7E-13 | 4.72        |
|                               | CHOLESTEROL HOMEOSTASIS          | 1.9E-11 | 8.25        |
| Down                          | MITOTIC SPINDLE                  | 7.0E-09 | 3.98        |
|                               | MYC TARGETS V1                   | 8.6E-08 | 3.64        |
|                               | MYC TARGETS V2                   | 3.2E-06 | 6.05        |
|                               | ESTROGEN RESPONSE LATE           | 2.2E-03 | 2.67        |
|                               | <b>FATTY ACID METABOLISM</b>     | 4.5E-03 | 2.97        |
| <b>ANDROGEN RESPONSE</b>      | 3.3E-02                          | 2.61    |             |

## Supplementary Figure 4. Drug-induced probes and genes in CCLs and hiPSC NPCs.

(a-b) Table of top 15 most frequently up- and down-regulated genes (absolute difference in robust Z-score  $\geq 2$ ) in CCLs (a) and hiPSC NPCs (b) across all drug-treatment conditions. (c-d) Biological pathways associated with gene sets that are frequently perturbed ( $\geq 5$  drugs) in CCLs (c) and hiPSC NPCs (d). Highlighted in bold are those pathways frequently perturbed in hiPSC NPCs but not CCLs.

| a       |         | Chemogenomic         | SZ-set     | FDR     | Drugs in overlap                              | Fold  |
|---------|---------|----------------------|------------|---------|-----------------------------------------------|-------|
| Type    | Feature | drugs                |            |         | Change                                        |       |
|         | ADRA2A  |                      |            | 7.8E-02 |                                               | 4.44  |
|         | HTR2C   |                      |            | 7.8E-02 |                                               | 4.44  |
| Drug    | ADRA1A  |                      |            | 7.8E-02 | Amoxapine, clozapine, risperidone, trazodone, | 4.00  |
| Targets | HTR1A   | SZ DE                | genes (UP) | 7.8E-02 | Ziprasidone                                   | 4.00  |
|         | HRH1    |                      |            | 8.8E-02 |                                               | 3.64  |
|         | HTR2A   |                      |            | 8.8E-02 |                                               | 3.64  |
| Drug    | Class   | Other antipsychotics | Red SZ     | 7.2E-02 | aripiprazole, iloperidone, risperidone        | 4.94  |
| ATC     |         |                      | Network    |         |                                               |       |
|         | ADRA2A  |                      |            | 1.9E-02 |                                               | 7.90  |
|         | HTR2C   |                      |            | 1.9E-02 |                                               | 7.90  |
|         | ADRA1A  |                      |            | 1.9E-02 | Amoxapine, clozapine, risperidone, trazodone  | 7.11  |
|         | HTR1A   |                      |            | 1.9E-02 |                                               | 7.11  |
|         | HRH1    |                      |            | 1.9E-02 |                                               | 6.46  |
|         | HTR2A   |                      |            | 1.9E-02 |                                               | 6.46  |
| Drug    | ADRA1B  |                      | Targets of | 6.7E-02 |                                               | 6.67  |
| Targets | ADRA2B  |                      | miR-137    | 6.7E-02 |                                               | 6.67  |
|         | ADRA2C  |                      | (UP)       | 7.4E-02 | Amoxapine, clozapine, risperidone             | 5.93  |
|         | DRD4    |                      |            | 7.4E-02 |                                               | 5.93  |
|         | DRD1    |                      |            | 8.8E-02 |                                               | 5.33  |
|         | DRD3    |                      |            | 8.8E-02 |                                               | 5.33  |
|         | SLC6A4  |                      |            | 7.4E-02 | Amoxapine, trazodone                          | 11.85 |
|         | HTR1D   |                      |            | 8.3E-02 | Estriol, Naloxone HCl, Norgestrel             | 8.89  |

  

| b           |                      | Chemogenomic | SZ-set | FDR     | Drugs in overlap                                                                                                      | Fold |
|-------------|----------------------|--------------|--------|---------|-----------------------------------------------------------------------------------------------------------------------|------|
| Type        | Feature              | drugs        |        |         | Change                                                                                                                |      |
|             | DRD1                 |              |        | 1.7E-02 |                                                                                                                       | 7.11 |
| Drug        | DRD3                 |              |        | 1.7E-02 | Aripiprazole, haloperidol, iloperidone, risperidone                                                                   | 7.11 |
| Targets     | DRD2                 |              |        | 1.9E-02 |                                                                                                                       | 6.46 |
|             | HTR2A                |              |        | 6.2E-03 | Aripiprazole, haloperidol, iloperidone, risperidone, trazodone                                                        | 8.08 |
| ATC (4)     | Other antipsychotics |              |        | 1.5E-02 |                                                                                                                       | 8.09 |
|             | ADRA2C               | Syn-609      | (UP)   | 8.0E-02 | Aripiprazole, iloperidone, risperidone                                                                                | 5.93 |
|             | DRD4                 |              |        | 8.0E-02 |                                                                                                                       | 5.93 |
|             | ADRA1A               |              |        | 1.7E-02 |                                                                                                                       | 7.11 |
|             | HTR1A                |              |        | 1.7E-02 | Aripiprazole, iloperidone, risperidone, trazodone                                                                     | 7.11 |
| Drug        | HRH1                 |              |        | 1.9E-02 |                                                                                                                       | 6.46 |
| Targets     | ADRA2A               |              |        | 8.0E-02 | Aripiprazole, risperidone, trazodone                                                                                  | 5.93 |
|             | HTR2C                |              |        | 8.0E-02 |                                                                                                                       | 5.93 |
|             | DRD1                 |              |        | 2.8E-02 |                                                                                                                       | 6.40 |
|             | DRD3                 |              |        | 2.8E-02 | Aripiprazole, haloperidol, iloperidone, risperidone                                                                   | 6.40 |
|             | DRD2                 |              |        | 3.0E-02 |                                                                                                                       | 5.82 |
|             | HTR2A                | Syn-187      | (UP)   | 1.2E-02 | Aripiprazole, haloperidol, iloperidone, risperidone, trazodone                                                        | 7.27 |
| ATC (4)     | Other antipsychotics |              |        | 7.4E-03 | Aripiprazole, iloperidone, risperidone                                                                                | 9.89 |
|             | ADRA1A               |              |        | 2.8E-02 |                                                                                                                       | 6.40 |
| Drug        | HTR1A                |              |        | 2.8E-02 | Aripiprazole, iloperidone, risperidone, trazodone                                                                     | 6.40 |
| Targets     | HRH1                 |              |        | 3.0E-02 |                                                                                                                       | 5.82 |
| Side-effect | Mental disorder      | Syn-39       | (UP)   | 9.0E-02 | Aripiprazole, haloperidol, iloperidone, naltrexone HCl, potassium estrone sulfate, risperidone, sorafenib, vigabatrin | 2.65 |
| ATC (4)     | Other antipsychotics |              |        | 1.9E-02 | Aripiprazole, iloperidone, risperidone                                                                                | 7.42 |

**Supplementary Figure 5. Drug-induced chemogenic analysis in CCLs and hiPSC NPCs.**  
(a-b) Chemogenic features that differ by cell type (a) or diagnosis (b), expanded from **Figure 4e** and **5e**.

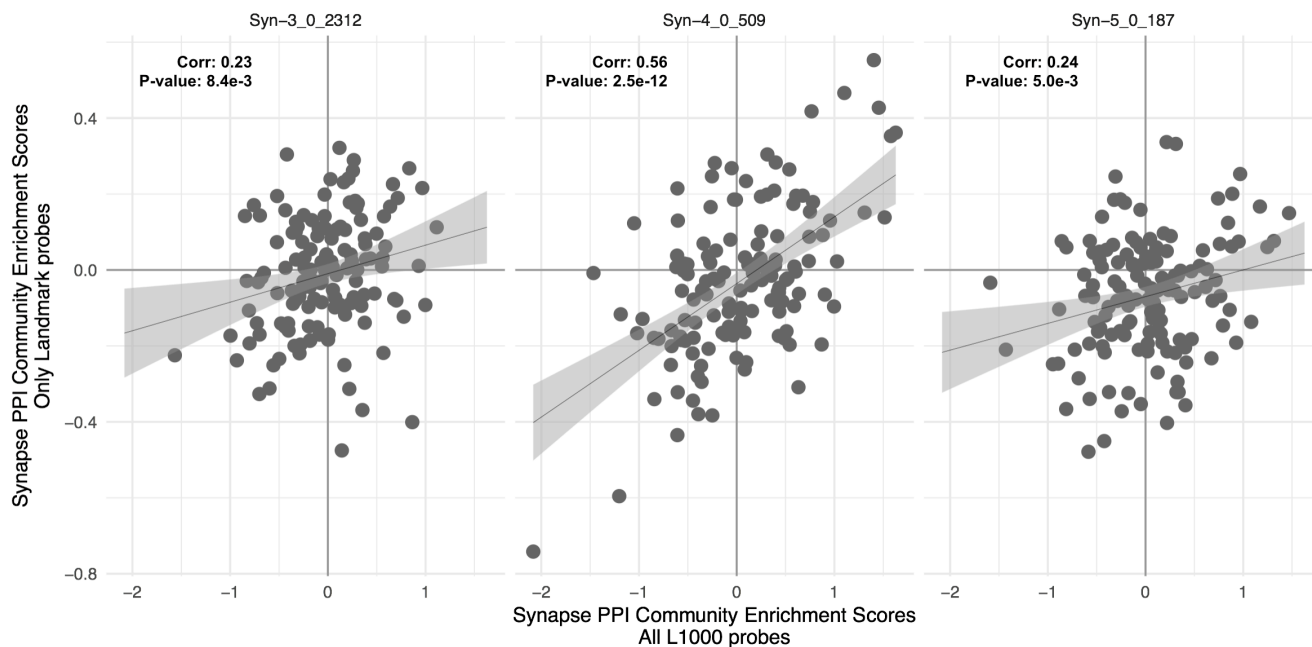

**Supplementary Figure 6. Concordance of Synapse PPI Enrichment Scores between all L1000 probes and landmark probes only.**

Summary of Synapse PPI Community enrichments for all drugs, calculated using all L1000 probes, compared with enrichment scores generated using only 978 landmark probes. Pearson correlation of enrichment t-statistics for all drugs assayed within the study, are shown.



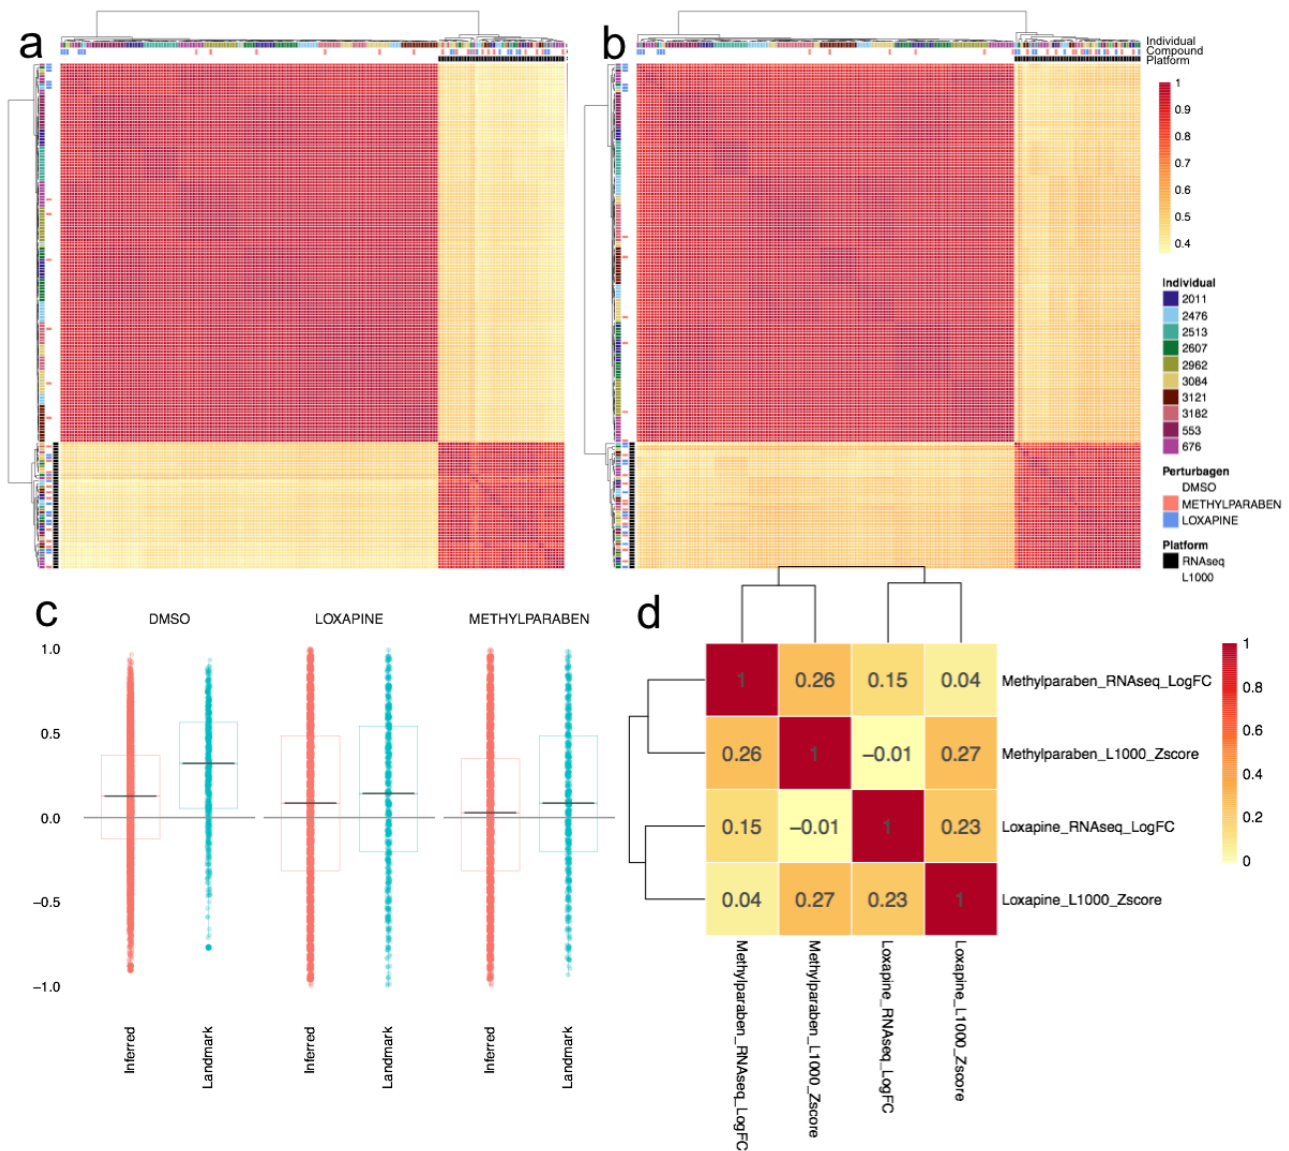

**Supplementary Figure 7. Mean pairwise Spearman's correlation across L1000 and RNA-seq platforms from hiPSC NPCs treated with loxapine or methylparaben.**

(a) Pearson correlation of normalized expression data from L1000 and RNA-seq for loxapine, methylparaben and DMSO (all probes). (b) Pearson correlation of normalized expression data from L1000 and RNA-seq for loxapine, methylparaben and DMSO (landmark probes only). (c) Gene-level Spearman correlation of normalized expression data from L1000 and RNA-seq for DMSO, loxapine, methylparaben and DMSO, stratified by L1000 probe-type. (d) Pairwise comparison (correlation) of loxapine and methylparaben signatures from L1000 and RNA-sequencing experiments.

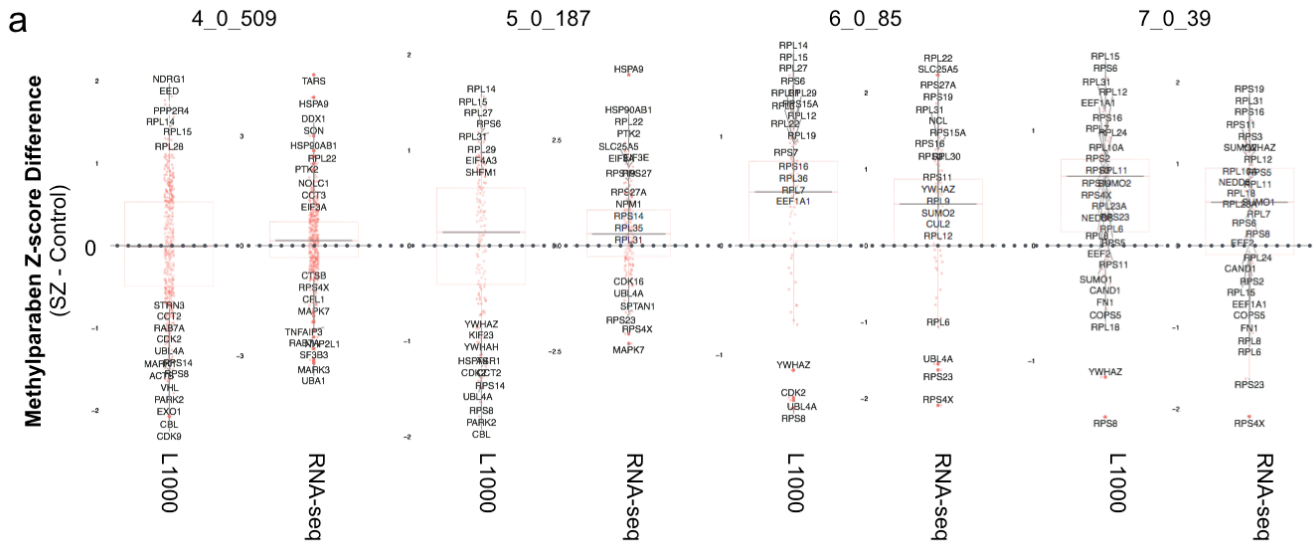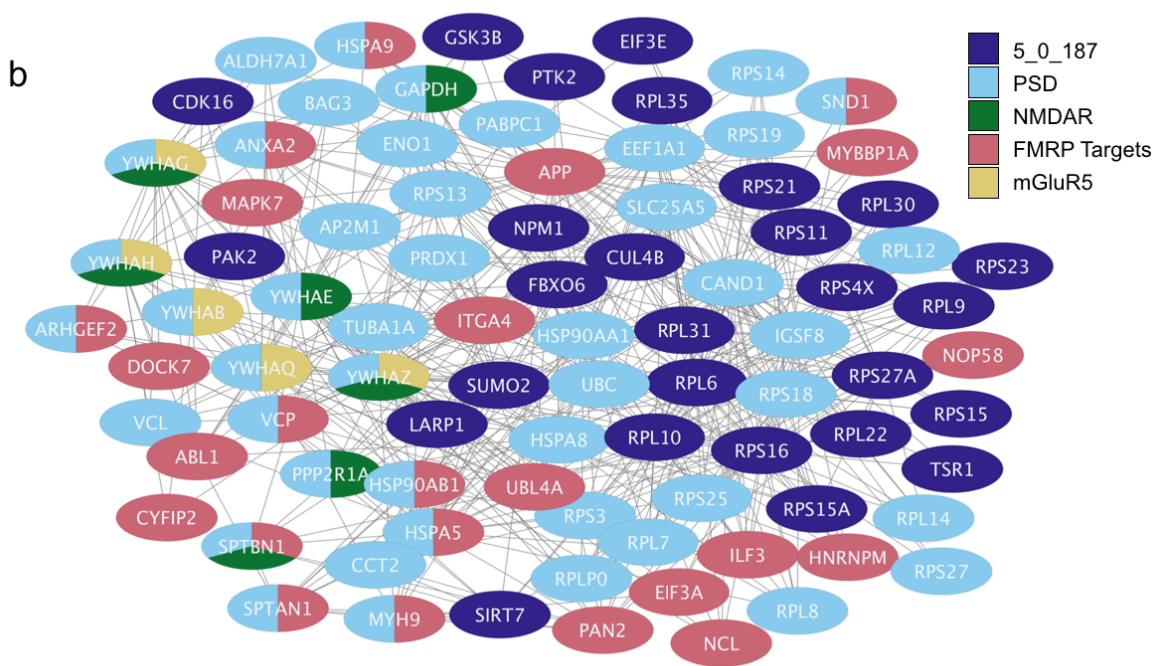

**Supplementary Figure 8. Methylparaben-induced regulation of SZ-sets, particularly synapse PPI communities.**

(a) Example synapse PPI communities (4\_0\_509, 5\_0\_187, 6\_0\_85, 7\_0\_39) that are most differentially regulated by methylparaben that are conserved between L1000 and RNA-seq. (Top 20 most differentially expressed genes are labelled) (b) Protein interaction network of synaptic genes perturbed by methylparaben treatment.

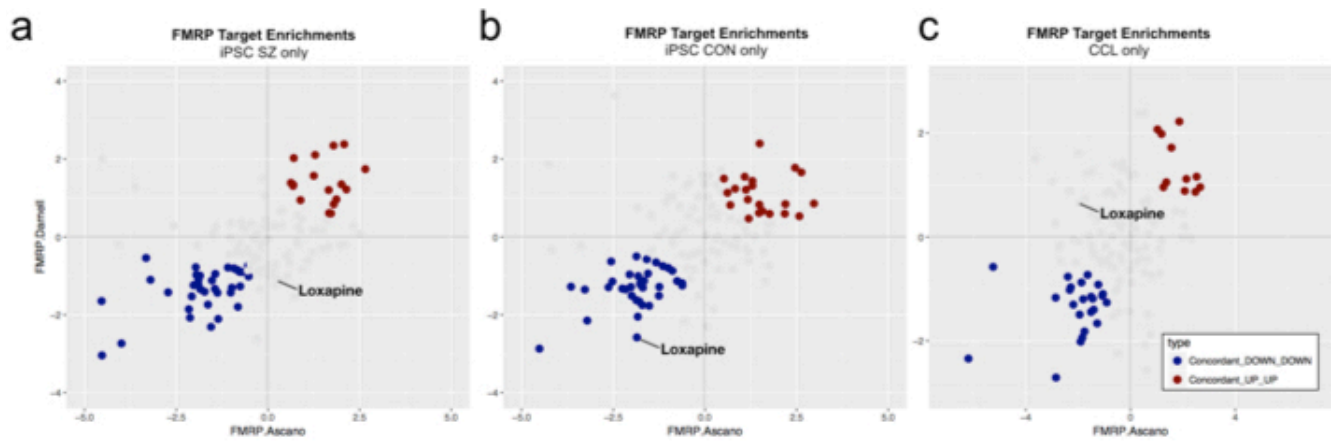

d

#### ACUK motifs in *de novo* NPD variants

| Dx  | Study    | Locus                    | Annotation | Ref | Alt | Symbol | Strand | Forward DNA sequence |
|-----|----------|--------------------------|------------|-----|-----|--------|--------|----------------------|
| SZ  | Fromer   | chr11:83194295           | esplice    | C   | T   | DLG2   | -      | ACTTACTCAGA          |
| ID  | Rauch    | chr9:130422307-130422308 | esplice    | AG  | N   | STXBP1 | +      | TCCACAGTCCGT         |
| SZ  | Xu       | chr12:120306864          | missense   | A   | G   | CIT    | -      | CTTACACTTCC          |
| ASD | lossifov | chr12:120172026          | missense   | T   | C   | CIT    | -      | CAAAC TGGGAT         |
| ASD | ORoak    | chr2:149225965-149225967 | frameshift | GTC | N   | MBD5   | +      | AATAAGTCTCATG        |
| ID  | Rauch    | chr22:42273402-42273403  | missense   | GC  | TT  | SREBF2 | +      | TGGCCGCAGTGT         |
| SZ  | Xu       | chr15:54586124           | missense   | G   | T   | UNC13C | +      | TCAAAGTCAGA          |
| SZ  | Fromer   | chr19:2117265            | missense   | G   | C   | AP3D1  | -      | ACTGGGTTTCAG         |
| ASD | lossifov | chr19:2121195            | missense   | T   | C   | AP3D1  | -      | TGGACTGGCTG          |
| ASD | ORoak    | chr20:49510027-49510029  | frameshift | CTT | N   | ADNP   | -      | GGGACTTTAACT         |

#### Supplementary Figure 9. Drug-induced regulation of FMRP targets.

(a-c) FMRP target enrichments in SZ hiPSC NPCs (a), control hiPSC NPCs (b) and CCLs (c). (d) ACUK FMRP binding motif variants identified in neuropsychiatric disease (NPD) mutations.

**Supplementary Table 1. Final prioritization of candidate drugs. README**

| <b>Column</b>                             | <b>Explanation</b>                                                                                                    |
|-------------------------------------------|-----------------------------------------------------------------------------------------------------------------------|
| <b>DRUG</b>                               | Drug name                                                                                                             |
| <b>LSN</b>                                | Drug identifier                                                                                                       |
| <b>nPhase</b>                             | Number of phases in which drug was profiled (max 2)                                                                   |
| <b>Phases</b>                             | Which phases a drug was profiled in                                                                                   |
| <b>Method_of_selection</b>                | Broad approach by which drug was prioritized for profiling                                                            |
| <b>Target_of_interest_profile</b>         | If drug was selected due to target profile, whether drug was associated with selective, or promiscuous target profile |
| <b>SZ_Sets</b>                            | If drug was selected due to association with SZ-sets, which SZ-set was implicated                                     |
| <b>Method_of_Connections_with_SZ_Sets</b> | If drug was selected due to association with SZ-sets, the sort of connection upon which association was based         |
| <b>ATC_level_1</b>                        | Drug class according to Anatomical and Therapeutic Chemical Classification System, Level 1                            |
| <b>ATC_level_2</b>                        | Drug class according to Anatomical and Therapeutic Chemical Classification System, Level 2                            |
| <b>ATC_level_3</b>                        | Drug class according to Anatomical and Therapeutic Chemical Classification System, Level 3                            |
| <b>ATC_level_4</b>                        | Drug class according to Anatomical and Therapeutic Chemical Classification System, Level 4                            |
| <b>ATC_level_5</b>                        | Drug class according to Anatomical and Therapeutic Chemical Classification System, Level 5                            |
| <b>selective</b>                          |                                                                                                                       |
| <b>promiscuous</b>                        |                                                                                                                       |
| <b>1P1</b>                                |                                                                                                                       |
| <b>LSN</b>                                |                                                                                                                       |
| <b>ATC</b>                                |                                                                                                                       |
| <b>SZ-set</b>                             |                                                                                                                       |
| <b>SZ-set libraries</b>                   |                                                                                                                       |
| <b>SCZ-denovo</b>                         |                                                                                                                       |
| <b>PGC2</b>                               |                                                                                                                       |

Supplementary Table 1. Final prioritization of candidate drugs.

| DRUG                          | LSN                 | nPhase | Phases | Method_of_selection                           | Target_of_interest_profile SZ_sets                             | Method_of_Connections_with_SZ_Sets                              | ATC_level_1                                                                                                   | ATC_level_2 | ATC_level_3 | ATC_level_4 | ATC_level_5 |
|-------------------------------|---------------------|--------|--------|-----------------------------------------------|----------------------------------------------------------------|-----------------------------------------------------------------|---------------------------------------------------------------------------------------------------------------|-------------|-------------|-------------|-------------|
| DIPHEMANIL METILSULFATE       | 26209               | 1      | P1     | Connectivity_with_SZ_sets                     | Coexp_Module_black                                             | topConnectivityScores                                           | A_ALIMENTARY_TRAC_A03_DRUGS_FOR_FUN_A03A_DRUGS_FOR_FUN_A03AB_Synthetic_anti_A03AB15                           |             |             |             |             |
| LANSOPRAZOLE                  | 520544              | 1      | P1     | Connectivity_with_SZ_sets                     | Coexp_Module_lightcyan                                         | topConnectivityScores                                           | A_ALIMENTARY_TRAC_A03_DRUGS_FOR_FUN_A03A_DRUGS_FOR_FUN_A03AB_Protion_pump_A03B03                              |             |             |             |             |
| LUPAZIDE                      | 351297              | 1      | P2     | Targets_of_interest                           | Selective                                                      |                                                                 | A_ALIMENTARY_TRAC_A10_DRUGS_USED_IN_A10B_BLOOD_GLUCCOS_A10BB_Sulfonamide_A10BB07                              |             |             |             |             |
| REPAGLUNIDE                   | 211645              | 1      | P1     | Connectivity_with_SZ_sets                     | Syn-3_0_2312                                                   | topConnectivityScores                                           | A_ALIMENTARY_TRAC_A10_DRUGS_USED_IN_A10B_BLOOD_GLUCCOS_A10BB_Other_blood_A10B02                               |             |             |             |             |
| CHENOEXOXYCHOLIC ACID         | 28374               | 2      | P1 P2  | Connectivity_with_SZ_sets                     | Coexp_Module_black                                             | topConnectivityScores                                           | A_ALIMENTARY_TRAC_A05_BILE_AND_LIVER_A05A_BILE_THERAPY_A05AA_Bile_acid_prep_A05AA01_A05AA02                   |             |             |             |             |
| BUDESONIDE                    | 686163              | 1      | P1     | Connectivity_with_SZ_sets                     | Syn-3_0_2312                                                   | topKnown+PredictedTargetEnrichments                             | A_ALIMENTARY_TRAC_A07_ANTIARRHEALS_A07A_INTESTINAL_ANI_A07EA_Corticosteroids_A07EA06_ID07A09_ID03A05_ID03BA02 |             |             |             |             |
| BAY.K8644                     | Pilot1.5 BAY.K8644  | 2      | P1 P2  | Tool_compound                                 |                                                                |                                                                 | C_CARDIOVASCULAR_C08_CALCIUM_CHANN_C08C_SELECTIVE_CALC_C08CA_Dihydropyridin_C08CA06                           |             |             |             |             |
| BUMETANIDE                    | 55431               | 1      | P1     | Connectivity_with_SZ_sets                     | Coexp_Module_black                                             | topConnectivityScores                                           | C_CARDIOVASCULAR_C03_DIURETICS_C03D_HIGH_CEILING_D_C03CA_Sulfonamides_C03CA02                                 |             |             |             |             |
| DIACRYLOROSCRISTINE           | 485024              | 1      | P1     | Connectivity_with_SZ_sets                     | Coexp_Module_brown                                             | topConnectivityScores                                           | C_CARDIOVASCULAR_C04_PERIPHERAL_VAS_C04A_PERIPHERAL_VAS_C04A_Ergot_alkaloids_C04A04                           |             |             |             |             |
| DILTIAZEM                     | 486402              | 1      | P1     | Connectivity_with_SZ_sets                     | Syn-3_0_2312                                                   | topConnectivityScores                                           | C_CARDIOVASCULAR_C08_CALCIUM_CHANN_C08D_SELECTIVE_CALC_C08DB_Benzothiazepin_C08DB01                           |             |             |             |             |
| FENDILINE                     | 686097              | 1      | P1     | Connectivity_with_SZ_sets                     | Coexp_Module_brown                                             | topConnectivityScores                                           | C_CARDIOVASCULAR_C08_CALCIUM_CHANN_C08C_NON-SELECTIVE_C08EA_Phenylalkylami_C08EA01                            |             |             |             |             |
| FLECAINIDE                    | 2351817             | 1      | P1     | Connectivity_with_SZ_sets                     | Coexp_Module_lightcyan                                         | topConnectivityScores                                           | C_CARDIOVASCULAR_C01_CARDIAC_THERAP_C01B_ANTIARRHYTHM_C01BC_Antiarrhythmic_C01BC04                            |             |             |             |             |
| FUROSEMIDE                    | 58858               | 1      | P1     | Connectivity_with_SZ_sets                     | Coexp_Module_black                                             | topConnectivityScores                                           | C_CARDIOVASCULAR_C03_DIURETICS_C03C_HIGH_CEILING_D_C03CA_Sulfonamides_C03CA01                                 |             |             |             |             |
| BUFLOMEDIL HYDROCHLORIDE      | 686142              | 1      | P2     | Targets_of_interest                           | Selective                                                      |                                                                 | C_CARDIOVASCULAR_C04_PERIPHERAL_VAS_C04A_PERIPHERAL_VAS_C04A4_Other_periphe_C04A420                           |             |             |             |             |
| EPIRENONE                     | 59228               | 1      | P2     | Targets_of_interest                           | Selective                                                      |                                                                 | C_CARDIOVASCULAR_C03_DIURETICS_C03D_POTASSIUM-SP_C03DA_Aldosterone_a_C03DA04                                  |             |             |             |             |
| MOXONIDINE                    | 433923              | 1      | P1     | Connectivity_with_SZ_sets                     | Coexp_Module_lightcyan                                         | topKnown+PredictedTargetEnrichments (NISCH)                     | C_CARDIOVASCULAR_C02_ANTIHYPERTENSIN_C02A_ANTIADENERGIC_C02AC_Imidazole_re_C02AC05                            |             |             |             |             |
| NADOLOL                       | 467746              | 1      | P1     | Connectivity_with_SZ_sets                     | Coexp_Module_black Coexp_Module_brown                          | topConnectivityScores                                           | C_CARDIOVASCULAR_C07_BETA_BLOCKING_C07A_BETA_BLOCKING_C07AA_Beta_blocking_C07AA12                             |             |             |             |             |
| NIMODIPINE                    | Pilot1.6 Nimodipine | 2      | P1 P2  | Tool_compound                                 |                                                                |                                                                 | C_CARDIOVASCULAR_C08_CALCIUM_CHANN_C08C_SELECTIVE_CALC_C08CA_Dihydropyridin_C08CA06                           |             |             |             |             |
| PRENYLAMINE                   | 686173              | 1      | P1     | Connectivity_with_SZ_sets                     | Coexp_Module_brown                                             | topConnectivityScores                                           | C_CARDIOVASCULAR_C01_CARDIAC_THERAP_C01D_VASODILATORS_C01DX_Other_vasodil_C01DX02                             |             |             |             |             |
| SOTALOL                       | 2330927             | 1      | P1     | Connectivity_with_SZ_sets                     | Coexp_Module_lightcyan                                         | topConnectivityScores                                           | C_CARDIOVASCULAR_C07_BETA_BLOCKING_C07A_BETA_BLOCKING_C07AA_Beta_blocking_C07AA07                             |             |             |             |             |
| SULOTIDIL                     | 255305              | 2      | P1 P2  | Connectivity_with_SZ_sets                     | Coexp_Module_brown                                             | topConnectivityScores                                           | C_CARDIOVASCULAR_C04_PERIPHERAL_VAS_C04A_PERIPHERAL_VAS_C04A4_Other_periphe_C04A420                           |             |             |             |             |
| SPRONOLACTONE                 | 646169              | 1      | P2     | Targets_of_interest                           | Selective                                                      |                                                                 | C_CARDIOVASCULAR_C03_DIURETICS_C03D_POTASSIUM-SP_C03DA_Aldosterone_a_C03DA04                                  |             |             |             |             |
| DEFLOSARONE                   | 57136               | 1      | P1     | Connectivity_with_SZ_sets                     | Coexp_Module_lightcyan Coexp_Module_black                      | topConnectivityScores                                           | D_DERMATOLOGICALS_D07_CORTICOSTEROID_D07A_CORTICOSTEROI_D07AC_Corticosteroid_D07A19                           |             |             |             |             |
| MAFENIDE HYDROCHLORIDE        | 81700               | 1      | P2     | Targets_of_interest                           | Promiscuous                                                    |                                                                 | D_DERMATOLOGICALS_D06_ANTIINFECTIVES_D06A_ANTIINFECTIVES_D06AA_Sulfonamides_D06AA03                           |             |             |             |             |
| PODOPHYLLOTOXIN               | 4038                | 1      | P2     | Connectivity_with_SZ_sets Targets_of_interest | Promiscuous                                                    | topConnectivityScores                                           | D_DERMATOLOGICALS_D06_ANTIINFECTIVES_D06A_ANTIINFECTIVES_D06AA_Sulfonamides_D06AA03                           |             |             |             |             |
| SULCONAZOLE                   | 2402722             | 1      | P1     | Connectivity_with_SZ_sets                     | Syn-3_0_2312                                                   | topConnectivityScores                                           | D_DERMATOLOGICALS_D01_ANTIINFUNGALS_FC_D01A_ANTIINFUNGALS_J_D01AC_Imidazole_and_D01AC09                       |             |             |             |             |
| NOGESTREL                     | 526576              | 1      | P2     | Targets_of_interest                           | Selective                                                      |                                                                 | G_GENITO_URINARY_G03_SEX_HORMONES_G03A_HORMONAL.CG_G03AC_Progestogens_G03AC08                                 |             |             |             |             |
| ESTRONE                       | 13550               | 1      | P2     | Targets_of_interest                           | Promiscuous                                                    |                                                                 | G_GENITO_URINARY_G03_SEX_HORMONES_G03C_ESTROGENS(GO_G03CA_Natural_and_s_G03CA07_G03CC04                       |             |             |             |             |
| ESTRADIOL                     | 71211               | 1      | P2     | Targets_of_interest                           | Selective                                                      |                                                                 | G_GENITO_URINARY_G03_SEX_HORMONES_G03C_ESTROGENS(GO_G03CA_Natural_and_s_G03CA04_G03CC06                       |             |             |             |             |
| CARBIMAZOLE                   | 61961               | 1      | P1     | Connectivity_with_SZ_sets                     | Coexp_Module_lightcyan                                         | topConnectivityScores                                           | H_SYSTEMIC_HORMOI_H03_THYROID_THERAI_H03B_ANTIHYROID_P_H03BB_Sulfur_contain_H03BB01                           |             |             |             |             |
| LEVOTHYROXINE SODIUM          | 2937597             | 1      | P1     | Connectivity_with_SZ_sets                     | Coexp_Module_lightcyan                                         | topConnectivityScores                                           | H_SYSTEMIC_HORMOI_H03_THYROID_THERAI_H03A_THYROID_PREP_H03AA_Thyroid_horm_H03AA01                             |             |             |             |             |
| ETHIONAMIDE                   | 438600              | 1      | P1     | Connectivity_with_SZ_sets                     | Coexp_Module_black                                             | topConnectivityScores                                           | J_ANTIINFECTIVES_F0I_J04_ANTIINFECTIVES_F0I_A_DRUGS_FOR_TRI_J04A4_Thiocarbamide_J04A03                        |             |             |             |             |
| ISONIAZID                     | 16660               | 1      | P1     | Connectivity_with_SZ_sets                     | Coexp_Module_black                                             | topConnectivityScores                                           | J_ANTIINFECTIVES_F0I_J04_ANTIINFECTIVES_F0I_A_DRUGS_FOR_TRI_J04A4_Hydrazides_J04A01                           |             |             |             |             |
| LAMIVUDINE                    | 543742              | 1      | P2     | Targets_of_interest                           | Selective                                                      |                                                                 | J_ANTIINFECTIVES_F0I_J05_ANTIINFECTIVES_F0I_A_DIRECT_ACTING_J05AF_Nucleoside_anc_J05AF05                      |             |             |             |             |
| NORFLOXACIN                   | 177733              | 1      | P2     | Targets_of_interest                           | Promiscuous                                                    |                                                                 | J_ANTIINFECTIVES_F0I_J01_ANTIINFECTIVES_F0I_M_QUINOLONE_A_J01MA_Fluoroquinolon_J01MA06_ID01AX12               |             |             |             |             |
| BOSUTINIB                     | 3149766             | 1      | P2     | Targets_of_interest                           | Promiscuous                                                    |                                                                 | L_ANTIINFECTIVES_F0I_J01_ANTIINFECTIVES_F0I_M_ANTIINFECTIVES_F0I_M01A_Protein_kinase_L01XE14                  |             |             |             |             |
| SORAFENIB                     | 2133026             | 1      | P2     | Targets_of_interest                           | Promiscuous                                                    |                                                                 | L_ANTIINFECTIVES_F0I_J01_ANTIINFECTIVES_F0I_M_ANTIINFECTIVES_F0I_M01A_Protein_kinase_L01XE05                  |             |             |             |             |
| VANDETANIB                    | 2442691             | 1      | P2     | Targets_of_interest                           | Promiscuous                                                    |                                                                 | L_ANTIINFECTIVES_F0I_J01_ANTIINFECTIVES_F0I_M_ANTIINFECTIVES_F0I_M01A_Protein_kinase_L01XE12                  |             |             |             |             |
| NORDIHYDROGUAIARETIC ACID     | 2409                | 1      | P1     | Connectivity_with_SZ_sets                     | Coexp_Module_lightcyan                                         | topConnectivityScores                                           | L_ANTIINFECTIVES_F0I_J01_ANTIINFECTIVES_F0I_M_ANTIINFECTIVES_F0I_M01A_Protein_kinase_L01XX10                  |             |             |             |             |
| VORINOSTAT                    | 2325578             | 1      | P1     | Connectivity_with_SZ_sets                     | Syn-3_0_2312                                                   | topKnown+TargetEnrichments                                      | L_ANTIINFECTIVES_F0I_J01_ANTIINFECTIVES_F0I_M_ANTIINFECTIVES_F0I_M01A_Protein_kinase_L01XX18                  |             |             |             |             |
| HYDROQUININE                  | 686160              | 1      | P1     | Connectivity_with_SZ_sets                     | Coexp_Module_brown                                             | topConnectivityScores                                           | M_MUSCULO_SKELETA_M09_OTHER_DRUGS_I_M09A_OTHER_DRUGS_I_M09AA_Quinine_and_M09AA01                              |             |             |             |             |
| INFLUMIC ACID                 | 62444               | 1      | P1     | Connectivity_with_SZ_sets                     | Syn-3_0_2312                                                   | topKnown+PredictedTargetEnrichments                             | M_MUSCULO_SKELETA_M01_ANTIINFAMMATO_M01A_ANTIINFAMMATO_M01AA_Other_antiinfl_M01AA02_ID02AA17                  |             |             |             |             |
| AMOXAPINE                     | 409924              | 1      | P1     | Connectivity_with_SZ_sets                     | Coexp_Module_brown                                             | topKnown+TargetEnrichments                                      | N_NERVOUS_SYSTEM_N06_PSYCHOANALEPT_N06A_ANTIINFECTIVES_N06AA_Non-selective_N06AA17                            |             |             |             |             |
| AMIPRAZOLE                    | 2073076             | 2      | P1 P2  | Connectivity_with_SZ_sets                     | Coexp_Module_brown                                             | topKnown+TargetEnrichments                                      | N_NERVOUS_SYSTEM_N05_PSYCHOLEPTICS_N05A_ANTIINFECTIVES_N05AA_Non-selective_N05AA12                            |             |             |             |             |
| CHLORPROMAZINE                | 431837              | 1      | P1     | Connectivity_with_SZ_sets                     | Coexp_Module_brown                                             | topKnown+TargetEnrichments                                      | N_NERVOUS_SYSTEM_N05_PSYCHOLEPTICS_N05A_ANTIINFECTIVES_N05AA_Phenothiazine_N05AA01                            |             |             |             |             |
| CLOZAPINE                     | 100326              | 1      | P2     | Connectivity_with_SZ_sets Targets_of_interest | Promiscuous                                                    | topKnown+TargetEnrichments (HRH4) topKnown+TargetEnrichments    | N_NERVOUS_SYSTEM_N05_PSYCHOLEPTICS_N05A_ANTIINFECTIVES_N05AA_Diazepines_o_N05AAH02                            |             |             |             |             |
| MEMANTINE HYDROCHLORIDE       | 50438               | 1      | P2     | Targets_of_interest                           | Promiscuous                                                    |                                                                 | N_NERVOUS_SYSTEM_N06_PSYCHOANALEPT_N06D_ANTI-DEMENTIA_N06DX_Other_anti-de_N06DX01                             |             |             |             |             |
| RISPERIDONE                   | 202549              | 1      | P2     | Targets_of_interest                           | Promiscuous                                                    |                                                                 | N_NERVOUS_SYSTEM_N05_PSYCHOLEPTICS_N05A_ANTIINFECTIVES_N05AA_Other_anti-de_N05AA08                            |             |             |             |             |
| HALOPERIDOL                   | 55047               | 1      | P1     | Connectivity_with_SZ_sets                     | Coexp_Module_black                                             | topConnectivityScores                                           | N_NERVOUS_SYSTEM_N05_PSYCHOLEPTICS_N05A_ANTIINFECTIVES_N05AA_Butyrophenone_N05AA01                            |             |             |             |             |
| BUPROPION HYDROCHLORIDE       | 486429              | 1      | P1     | Targets_of_interest                           | Selective                                                      |                                                                 | N_NERVOUS_SYSTEM_N06_PSYCHOANALEPT_N06A_ANTIINFECTIVES_N06AA_Other_anti-de_N06AA12                            |             |             |             |             |
| LOXAPINE                      | 2797238             | 1      | P1     | Connectivity_with_SZ_sets                     | Coexp_Module_brown                                             | topKnown+TargetEnrichments                                      | N_NERVOUS_SYSTEM_N05_PSYCHOLEPTICS_N05A_ANTIINFECTIVES_N05AA_Diazepines_o_N05AAH01                            |             |             |             |             |
| MELATONIN                     | 45235               | 1      | P1     | Connectivity_with_SZ_sets                     | Coexp_Module_lightcyan Coexp_Module_black                      | topConnectivityScores topKnown+PredictedTargetEnrichments (MPO) | N_NERVOUS_SYSTEM_N05_PSYCHOLEPTICS_N05C_HYPNOTICS_ANI_N05CH_Melatonin_re_N05CH01                              |             |             |             |             |
| NEFOPAM                       | 81742               | 2      | P1 P2  | Connectivity_with_SZ_sets                     | Coexp_Module_lightcyan                                         | topConnectivityScores                                           | N_NERVOUS_SYSTEM_N02_ANALGESICS_N02B_OTHER_ANALGIE_N02BB_Other_analges_N02BB06                                |             |             |             |             |
| ILOPERIDONE                   | 629423              | 1      | P2     | Targets_of_interest                           | Selective                                                      |                                                                 | N_NERVOUS_SYSTEM_N05_PSYCHOLEPTICS_N05A_ANTIINFECTIVES_N05AA_Other_anti-de_N05AA14                            |             |             |             |             |
| PHENELZINE                    | 113719              | 1      | P1     | Connectivity_with_SZ_sets                     | Coexp_Module_lightcyan Coexp_Module_black                      | topConnectivityScores                                           | N_NERVOUS_SYSTEM_N06_PSYCHOANALEPT_N06A_ANTIINFECTIVES_N06AA_Monoamine_o_N06AA03                              |             |             |             |             |
| PIZOTIFEN                     | 2136329             | 1      | P1     | Connectivity_with_SZ_sets                     | Coexp_Module_brown                                             | topConnectivityScores                                           | N_NERVOUS_SYSTEM_N02_ANALGESICS_N02C_ANTIINFLAMM_N02CC_Other_anti-de_N02CC01                                  |             |             |             |             |
| PRIMIDONE                     | 18046               | 1      | P1     | Connectivity_with_SZ_sets                     | Syn-3_5_12                                                     | topKnown+TargetEnrichments                                      | N_NERVOUS_SYSTEM_N03_ANTIINFECTIVES_N03A_ANTIINFECTIVES_N03AA_Barbitalurates_A_N03AA03                        |             |             |             |             |
| QUETIAPINE                    | 2397678             | 2      | P1 P2  | Connectivity_with_SZ_sets                     | Coexp_Module_black                                             | topConnectivityScores                                           | N_NERVOUS_SYSTEM_N05_PSYCHOLEPTICS_N05A_ANTIINFECTIVES_N05AA_Diazepines_o_N05AAH04                            |             |             |             |             |
| MOCLOBEMIDE                   | 603362              | 1      | P2     | Targets_of_interest                           | Selective                                                      |                                                                 | N_NERVOUS_SYSTEM_N06_PSYCHOANALEPT_N06A_ANTIINFECTIVES_N06AA_Monoamine_o_N06AA02                              |             |             |             |             |
| NALTREXONE HYDROCHLORIDE      | 486497              | 1      | P2     | Targets_of_interest                           | Selective                                                      |                                                                 | N_NERVOUS_SYSTEM_N07_OTHER_NERVOUS_N07B_DRUGS_USED_IN_N07BB04                                                 |             |             |             |             |
| TRAZODONE                     | 81737               | 1      | P1     | Connectivity_with_SZ_sets                     | Syn-3_0_2312                                                   | topConnectivityScores                                           | N_NERVOUS_SYSTEM_N06_PSYCHOANALEPT_N06A_ANTIINFECTIVES_N06AA_Other_anti-de_N06AA05                            |             |             |             |             |
| TRIMETAZIDONE                 | 92223               | 1      | P1     | Connectivity_with_SZ_sets                     | Coexp_Module_lightcyan                                         | topConnectivityScores                                           | N_NERVOUS_SYSTEM_N03_ANTIINFECTIVES_N03A_ANTIINFECTIVES_N03AC_Oxazolidinone_N03AC02                           |             |             |             |             |
| TAGABINE                      | 279847              | 1      | P2     | Targets_of_interest                           | Selective                                                      |                                                                 | N_NERVOUS_SYSTEM_N03_ANTIINFECTIVES_N03A_ANTIINFECTIVES_N03AG_Fatty_acid_de_N03AG06                           |             |             |             |             |
| TRANVILCPROMINE HYDROCHLORIDE | 486541              | 1      | P2     | Targets_of_interest                           | Selective                                                      |                                                                 | N_NERVOUS_SYSTEM_N06_PSYCHOANALEPT_N06A_ANTIINFECTIVES_N06AA_Monoamine_o_N06AA04                              |             |             |             |             |
| VIGABATRIN                    | 486547              | 1      | P1     | Connectivity_with_SZ_sets                     | Coexp_Module_black                                             | topConnectivityScores                                           | N_NERVOUS_SYSTEM_N03_ANTIINFECTIVES_N03A_ANTIINFECTIVES_N03AG_Fatty_acid_de_N03AG04                           |             |             |             |             |
| ZIPRASIDONE                   | 426345              | 2      | P1 P2  | Connectivity_with_SZ_sets                     | Coexp_Module_brown                                             | topKnown+TargetEnrichments                                      | N_NERVOUS_SYSTEM_N05_PSYCHOLEPTICS_N05A_ANTIINFECTIVES_N05AA_Indole_derivat_N05AA04                           |             |             |             |             |
| CHLORPROMAZINE HYDROCHLORIDE  | 22389               | 1      | P2     | Targets_of_interest                           | Promiscuous                                                    |                                                                 | N_NERVOUS_SYSTEM_N05_PSYCHOLEPTICS_N05A_ANTIINFECTIVES_N05AA_Phenothiazine_N05AA01                            |             |             |             |             |
| PHENAZONE                     | 39902               | 1      | P1     | Connectivity_with_SZ_sets                     | Coexp_Module_black                                             | topConnectivityScores                                           | N_NERVOUS_SYSTEM N02_ANALGESICS S02_N02B_OTHER_ANALGIE_N02BB_Pyrazolones S02BB01_ID02DA03                     |             |             |             |             |
| PHENETOLINE                   | 28825               | 1      | P1     | Connectivity_with_SZ_sets                     | Coexp_Module_black                                             | topConnectivityScores                                           | P_ANTIINFECTIVES_P01_ANTIINFECTIVES_P01A_AGENTS_AGAIN_P01AA_Other_agents_P01AA02                              |             |             |             |             |
| MERBENDAZOLE                  | 122285              | 2      | P1 P2  | Connectivity_with_SZ_sets                     | Coexp_Module_black                                             | topConnectivityScores                                           | P_ANTIINFECTIVES_P02_ANTIINFECTIVES_P02A_ANTIINFECTIVES_P02AA_Benzimidazole_P02AA01                           |             |             |             |             |
| NICLOSAMIDE                   | 40016               | 2      | P1 P2  | Connectivity_with_SZ_sets                     | Coexp_Module_brown                                             | topConnectivityScores                                           | P_ANTIINFECTIVES_P02_ANTIINFECTIVES_P02D_ANTIINFECTIVES_P02DA_Salicylic_acid_o_P02DA01                        |             |             |             |             |
| PRESTWICK.675                 | 126740              | 1      | P1     | Connectivity_with_SZ_sets                     | Coexp_Module_lightcyan Coexp_Module_black                      | topConnectivityScores                                           | P_ANTIINFECTIVES_P02_ANTIINFECTIVES_P02C_ANTIINFECTIVES_P02CA_Benzimidazole_P02CA03                           |             |             |             |             |
| CHLORCYCLIZINE                | 50383               | 1      | P1     | Connectivity_with_SZ_sets                     | Coexp_Module_brown                                             | topConnectivityScores                                           | R_RESPIRATORY_SYSTEM_R06_ANTIINFECTIVES_R06A_ANTIINFECTIVES_R06AA_Piperazine_der_R06AA04                      |             |             |             |             |
| TYLOXAPOL                     | 2879388             | 1      | P1     | Connectivity_with_SZ_sets                     | Syn-3_0_2312                                                   | topConnectivityScores                                           | R_RESPIRATORY_SYSTEM_R05_COUGH_AND_CO_R05C_EXPECTORANTS_R05CA_Expectorants_R05CA01                            |             |             |             |             |
| DOPAZOLAMIDE HYDROCHLORIDE    | 2387174             | 1      | P2     | Targets_of_interest                           | Promiscuous                                                    |                                                                 | S_SENSORI_ORGANS_S01_OPTHALMOLOGI_S01A_ANTIINFECTIVES_S01EA_Carbonic_anhydr_S01EA03                           |             |             |             |             |
| DICLOFENAMIDE                 | 4402773             | 1      | P1     | Connectivity_with_SZ_sets                     | Coexp_Module_black                                             | topConnectivityScores                                           | S_SENSORI_ORGANS_S01_OPTHALMOLOGI_S01A_ANTIINFECTIVES_S01EA_Carbonic_anhydr_S01EA02                           |             |             |             |             |
| NALOXONE HYDROCHLORIDE        | 486496              | 1      | P2     | Targets_of_interest                           | Selective                                                      |                                                                 | V_VARIABLES_V03_ALL_OTHER_THFV03A_ALL_OTHER_THFV03AB_Antidotes_V03AB15                                        |             |             |             |             |
| ALPHA.ERGOCRYPTINE            | 277784              | 1      | P1     | Connectivity_with_SZ_sets                     | Coexp_Module_lightcyan                                         | topConnectivityScores                                           |                                                                                                               |             |             |             |             |
| ANDROSTERONE                  | 20265               | 1      | P2     | Targets_of_interest                           | Promiscuous                                                    |                                                                 |                                                                                                               |             |             |             |             |
| ANISOMYCN                     | 22948               | 1      | P1     | Connectivity_with_SZ_sets                     | Coexp_Module_black Coexp_Module_brown Syn-4_0_509 Syn-3_0_2312 | topConnectivityScores topKnown+TargetEnrichments                |                                                                                                               |             |             |             |             |
| ARACHIDONYL TRIFLUOROMETHANE  | 315756              | 1      | P1     | Connectivity_with_SZ_sets                     | Coexp_Module_black                                             | topConnectivityScores                                           |                                                                                                               |             |             |             |             |
| ARGABINE                      | 231990              | 1      | P1     | Connectivity_with_SZ_sets                     | Coexp_Module_lightcyan                                         | topConnectivityScores                                           |                                                                                                               |             |             |             |             |
| BAS.012416453                 | 2234529             | 1      | P1     | Connectivity_with_SZ_sets                     | Coexp_Module_lightcyan                                         | topConnectivityScores                                           |                                                                                                               |             |             |             |             |
| BMS.250904                    | 2191400             | 1      | P2     | Targets_of_interest                           | Promiscuous                                                    |                                                                 |                                                                                                               |             |             |             |             |
| BERGENIN                      | 2402706             | 1      | P1     | Connectivity_with_SZ_sets                     | Coexp_Module_lightcyan                                         | topConnectivityScores                                           |                                                                                                               |             |             |             |             |
| BUCLADESINE                   | 99845               | 1      | P1     | Connectivity_with_SZ_sets                     | Syn-3_0_2312                                                   | topKnown+PredictedTargetEnrichments                             |                                                                                                               |             |             |             |             |
| CORTICOSTERONE                | 30209               | 1      | P2     | Targets_of_interest                           | Promiscuous                                                    |                                                                 |                                                                                                               |             |             |             |             |
| CELASTROL                     | 2631718             | 2      | P1 P2  | Connectivity_with_SZ_sets                     | Coexp_Module_lightcyan                                         | topConnectivityScores                                           |                                                                                                               |             |             |             |             |
| CEPHALEURINE                  | 11796               | 1      | P1     | Connectivity_with_SZ_sets                     | Coexp_Module_brown                                             | topConnectivityScores                                           |                                                                                                               |             |             |             |             |
| ETHOXZOLAMIDE                 | 509181              | 1      | P2     | Targets_of_interest                           | Promiscuous                                                    |                                                                 |                                                                                                               |             |             |             |             |
| GABAZINE                      | 331565              | 1      | P2     |                                               |                                                                |                                                                 |                                                                                                               |             |             |             |             |

|                                     |                         |         |                           |             |                                       |                                            |
|-------------------------------------|-------------------------|---------|---------------------------|-------------|---------------------------------------|--------------------------------------------|
| DLTHIORPHAN                         | 136738                  | 2 P1 P2 | Connectivity_with_SZ_sets |             | Syn-3_0_2312                          | TopConnectivityScores                      |
| PHENELZINE.SULFATE                  | 31562                   | 1 P2    | Targets_of_interest       | Promiscuous |                                       |                                            |
| POTASSIUM.ESTRONE.SULFATE           | 23912                   | 1 P2    | Targets_of_interest       | Promiscuous |                                       |                                            |
| SB_242235                           | 2105401                 | 1 P2    | Targets_of_interest       | Promiscuous |                                       |                                            |
| URAPIDIL_5.METHYL                   | 300731                  | 1 P2    | Targets_of_interest       | Promiscuous |                                       |                                            |
| VATALANIB                           | 580308                  | 1 P2    | Targets_of_interest       | Promiscuous |                                       |                                            |
| WB.4101.HYDROCHLORIDE               | 300505                  | 1 P2    | Targets_of_interest       | Promiscuous |                                       |                                            |
| BENZYL.OXYCARBONYL.L.GLYCYL.L.PHENI | 56009                   | 1 P2    | Targets_of_interest       | Selective   |                                       |                                            |
| CETOCYCLINE...A.13428.              | 54929                   | 1 P2    | Targets_of_interest       | Selective   |                                       |                                            |
| CM.ZA.0576                          | 534501                  | 1 P2    | Targets_of_interest       | Selective   |                                       |                                            |
| LIOTHYRONINE                        | 36019                   | 1 P1    | Connectivity_with_SZ_sets |             | Syn-3_5_12                            | topKnown+PredictedTargetEnrichments        |
| LY379268                            | Pilot1.2 LY379268       | 2 P1 P2 | Tool_compound             |             |                                       |                                            |
| LYCORINE                            | 589074                  | 2 P1 P2 | Connectivity_with_SZ_sets |             | Coexp_Module_black Coexp_Module_brown | topConnectivityScores                      |
| CONESSINE                           | 17759                   | 1 P2    | Targets_of_interest       | Selective   |                                       |                                            |
| DIHYDROSTILBESTROL                  | 5805                    | 1 P2    | Targets_of_interest       | Selective   |                                       |                                            |
| MDL100907                           | Pilot1.4 MDL100907      | 2 P1 P2 | Tool_compound             |             |                                       |                                            |
| DIPHENYLAMINOTRIAZINE               | 3240                    | 1 P2    | Targets_of_interest       | Selective   |                                       |                                            |
| METHYLBENZETHONIUM.CHLORIDE         | 2402701                 | 1 P1    | Connectivity_with_SZ_sets |             | Coexp_Module_brown                    | topConnectivityScores                      |
| EQUILENIN                           | 5272                    | 1 P2    | Targets_of_interest       | Selective   |                                       |                                            |
| MYELOPEROXIDASE.INHIBITOR.I         | 16850                   | 1 P1    | Connectivity_with_SZ_sets |             | Coexp_Module_black                    | topKnown+PredictedTargetEnrichments (MPO)  |
| ETIFENIN                            | 686164                  | 1 P2    | Targets_of_interest       | Selective   |                                       |                                            |
| GLAXO.GR247538                      | 2814631                 | 1 P2    | Targets_of_interest       | Selective   |                                       |                                            |
| NARINGENIN                          | 22473                   | 1 P1    | Connectivity_with_SZ_sets |             | Coexp_Module_black                    | topConnectivityScores                      |
| GT.2394.RAC                         | 2014221                 | 1 P2    | Targets_of_interest       | Selective   |                                       |                                            |
| IOFETAMINE.HYDROCHLORIDE            | 486362                  | 1 P2    | Targets_of_interest       | Selective   |                                       |                                            |
| PHENYL.BIGUANIDE                    | 155313                  | 1 P1    | Connectivity_with_SZ_sets |             | Coexp_Module_black                    | topConnectivityScores                      |
| PK11195                             | 351291                  | 1 P1    | Connectivity_with_SZ_sets |             | Coexp_Module_black                    | topKnown+PredictedTargetEnrichments (TSPO) |
| METHYLPARABEN                       | 13258                   | 1 P2    | Targets_of_interest       | Selective   |                                       |                                            |
| QUINPIROLE                          | Pilot1.1 quinpirole     | 2 P1 P2 | Tool_compound             |             |                                       |                                            |
| N6.CYCLOPENTYLADENOSINE             | 486347                  | 1 P2    | Targets_of_interest       | Selective   |                                       |                                            |
| RONIDAZOLE                          | 2778926                 | 1 P1    | Connectivity_with_SZ_sets |             | Syn-3_0_2312                          | TopConnectivityScores                      |
| SALSOLIDIN                          | 15701                   | 2 P1 P2 | Connectivity_with_SZ_sets |             | Coexp_Module_lightcyan                | topConnectivityScores                      |
| SPIRADOLINE                         | 2430361                 | 1 P1    | Connectivity_with_SZ_sets |             | Coexp_Module_lightcyan                | topConnectivityScores                      |
| NORETHINDRONE                       | 526577                  | 1 P2    | Targets_of_interest       | Selective   |                                       |                                            |
| TANESPIMYCIN..                      | Positive Control PosCon | 2 P1 P2 | Positive_control          |             |                                       |                                            |
| TCB.2                               | Pilot1.3 TCB-2          | 2 P1 P2 | Tool_compound             |             |                                       |                                            |
| PERCEPTIN                           | 2021964                 | 1 P2    | Targets_of_interest       | Selective   |                                       |                                            |
| QUIPAZINE..N.METHYL..DIMALEATE      | 486514                  | 1 P2    | Targets_of_interest       | Selective   |                                       |                                            |
| TRICHOSTATIN.A..                    | Positive Control PosCon | 2 P1 P2 | Positive_control          |             |                                       |                                            |
| TRIMETHOBENZAMIDE                   | 686087                  | 1 P1    | Connectivity_with_SZ_sets |             | Coexp_Module_black                    | topConnectivityScores                      |
| SB.43152                            | 2070306                 | 1 P2    | Targets_of_interest       | Selective   |                                       |                                            |
| UNCO638                             | 3043333                 | 1 P2    | Targets_of_interest       | Selective   |                                       |                                            |
| X3.ACETAMIDOCOUMARIN                | 276862                  | 2 P1 P2 | Connectivity_with_SZ_sets |             | Coexp_Module_black                    | topConnectivityScores                      |
| X4.HYDROXYPHENAZONE                 | 8571                    | 1 P1    | Connectivity_with_SZ_sets |             | Coexp_Module_lightcyan                | topConnectivityScores                      |
| ZARDAVERINE                         | 2459550                 | 1 P1    | Connectivity_with_SZ_sets |             | Coexp_Module_brown                    | topConnectivityScores                      |

**Supplementary Table 2. SZ-sets collated across transcriptomic, genetic and protein-centric perspectives.**

| <b>SZ_Set_Library</b> | <b>SZ_Set</b>      | <b>Entrez</b> | <b>Symbol</b> |
|-----------------------|--------------------|---------------|---------------|
| SZ_Networks           | Coexp_Module_black | 57786         | RBAK          |
| SZ_Networks           | Coexp_Module_black | 147949        | ZNF583        |
| SZ_Networks           | Coexp_Module_black | 7559          | ZNF12         |
| SZ_Networks           | Coexp_Module_black | 55180         | LINS          |
| SZ_Networks           | Coexp_Module_black | 80321         | CEP70         |
| SZ_Networks           | Coexp_Module_black | 10945         | KDELR1        |
| SZ_Networks           | Coexp_Module_black | 91283         | MSANTD3       |
| SZ_Networks           | Coexp_Module_black | 4760          | NEUROD1       |
| SZ_Networks           | Coexp_Module_black | 4008          | LMO7          |
| SZ_Networks           | Coexp_Module_black | 114783        | LMTK3         |
| SZ_Networks           | Coexp_Module_black | 55275         | VPS53         |
| SZ_Networks           | Coexp_Module_black | 162655        | ZNF519        |
| SZ_Networks           | Coexp_Module_black | 647979        | LINC00657     |
| SZ_Networks           | Coexp_Module_black | 7798          | LUZP1         |
| SZ_Networks           | Coexp_Module_black | 10198         | MPHOSPH9      |
| SZ_Networks           | Coexp_Module_black | 389072        | PLEKHM3       |
| SZ_Networks           | Coexp_Module_black | 6546          | SLC8A1        |
| SZ_Networks           | Coexp_Module_black | 57719         | ANO8          |
| SZ_Networks           | Coexp_Module_black | 401106        | LINC00884     |
| SZ_Networks           | Coexp_Module_black | 2589          | GALNT1        |
| SZ_Networks           | Coexp_Module_black | 642987        | TMEM232       |
| SZ_Networks           | Coexp_Module_black | 256369        | LINC00521     |
| SZ_Networks           | Coexp_Module_black | 57062         | DDX24         |
| SZ_Networks           | Coexp_Module_black | 10956         | OS9           |
| SZ_Networks           | Coexp_Module_black | 10097         | ACTR2         |
| SZ_Networks           | Coexp_Module_black | 3190          | HNRNPK        |
| SZ_Networks           | Coexp_Module_black | 23019         | CNOT1         |
| SZ_Networks           | Coexp_Module_black | 22872         | SEC31A        |
| SZ_Networks           | Coexp_Module_black | 6749          | SSRP1         |
| SZ_Networks           | Coexp_Module_black | 10970         | CKAP4         |
| SZ_Networks           | Coexp_Module_black | 5886          | RAD23A        |
| SZ_Networks           | Coexp_Module_black | 8239          | USP9X         |
| SZ_Networks           | Coexp_Module_black | 10425         | ARIH2         |
| SZ_Networks           | Coexp_Module_black | 6601          | SMARCC2       |
| SZ_Networks           | Coexp_Module_black | 9520          | NPEPPS        |
| SZ_Networks           | Coexp_Module_black | 6240          | RRM1          |
| SZ_Networks           | Coexp_Module_black | 6829          | SUPT5H        |
| SZ_Networks           | Coexp_Module_black | 22985         | ACIN1         |
| SZ_Networks           | Coexp_Module_black | 9685          | CLINT1        |
| SZ_Networks           | Coexp_Module_black | 9049          | AIP           |
| SZ_Networks           | Coexp_Module_black | 8615          | USO1          |
| SZ_Networks           | Coexp_Module_black | 11231         | SEC63         |
| SZ_Networks           | Coexp_Module_black | 55186         | SLC25A36      |
| SZ_Networks           | Coexp_Module_black | 23064         | SETX          |
| SZ_Networks           | Coexp_Module_black | 9897          | KIAA0196      |
| SZ_Networks           | Coexp_Module_black | 224           | ALDH3A2       |
| SZ_Networks           | Coexp_Module_black | 25800         | SLC39A6       |
| SZ_Networks           | Coexp_Module_black | 10659         | CELF2         |
| SZ_Networks           | Coexp_Module_black | 5692          | PSMB4         |
| SZ_Networks           | Coexp_Module_black | 64746         | ACBD3         |
| SZ_Networks           | Coexp_Module_black | 5635          | PRPSAP1       |
| SZ_Networks           | Coexp_Module_black | 9217          | VAPB          |
| SZ_Networks           | Coexp_Module_black | 2776          | GNAQ          |
| SZ_Networks           | Coexp_Module_black | 4204          | MECP2         |
| SZ_Networks           | Coexp_Module_black | 6311          | ATXN2         |

|             |                    |        |          |
|-------------|--------------------|--------|----------|
| SZ_Networks | Coexp_Module_black | 8295   | TRRAP    |
| SZ_Networks | Coexp_Module_black | 9792   | SERTAD2  |
| SZ_Networks | Coexp_Module_black | 30836  | DNTTIP2  |
| SZ_Networks | Coexp_Module_black | 54838  | WBP1L    |
| SZ_Networks | Coexp_Module_black | 5089   | PBX2     |
| SZ_Networks | Coexp_Module_black | 22796  | COG2     |
| SZ_Networks | Coexp_Module_black | 6733   | SRPK2    |
| SZ_Networks | Coexp_Module_black | 1025   | CDK9     |
| SZ_Networks | Coexp_Module_black | 80204  | FBXO11   |
| SZ_Networks | Coexp_Module_black | 23362  | PSD3     |
| SZ_Networks | Coexp_Module_black | 5685   | PSMA4    |
| SZ_Networks | Coexp_Module_black | 9757   | KMT2B    |
| SZ_Networks | Coexp_Module_black | 9743   | ARHGAP32 |
| SZ_Networks | Coexp_Module_black | 5469   | MED1     |
| SZ_Networks | Coexp_Module_black | 5537   | PPP6C    |
| SZ_Networks | Coexp_Module_black | 8603   | FAM193A  |
| SZ_Networks | Coexp_Module_black | 2002   | ELK1     |
| SZ_Networks | Coexp_Module_black | 5433   | POLR2D   |
| SZ_Networks | Coexp_Module_black | 9931   | HELZ     |
| SZ_Networks | Coexp_Module_black | 1687   | DFNA5    |
| SZ_Networks | Coexp_Module_black | 5332   | PLCB4    |
| SZ_Networks | Coexp_Module_black | 4137   | MAPT     |
| SZ_Networks | Coexp_Module_black | 9371   | KIF3B    |
| SZ_Networks | Coexp_Module_black | 9923   | ZBTB40   |
| SZ_Networks | Coexp_Module_black | 5074   | PAWR     |
| SZ_Networks | Coexp_Module_black | 9749   | PHACTR2  |
| SZ_Networks | Coexp_Module_black | 116987 | AGAP1    |
| SZ_Networks | Coexp_Module_black | 10210  | TOPORS   |
| SZ_Networks | Coexp_Module_black | 6018   | RLF      |
| SZ_Networks | Coexp_Module_black | 1385   | CREB1    |
| SZ_Networks | Coexp_Module_black | 25913  | POT1     |
| SZ_Networks | Coexp_Module_black | 6668   | SP2      |
| SZ_Networks | Coexp_Module_black | 10978  | CLP1     |
| SZ_Networks | Coexp_Module_black | 8570   | KHSRP    |
| SZ_Networks | Coexp_Module_black | 26578  | OSTF1    |
| SZ_Networks | Coexp_Module_black | 5534   | PPP3R1   |
| SZ_Networks | Coexp_Module_black | 7699   | ZNF140   |
| SZ_Networks | Coexp_Module_black | 5170   | PDPK1    |
| SZ_Networks | Coexp_Module_black | 10573  | MRPL28   |
| SZ_Networks | Coexp_Module_black | 9527   | GOSR1    |
| SZ_Networks | Coexp_Module_black | 66036  | MTMR9    |
| SZ_Networks | Coexp_Module_black | 8411   | EEA1     |
| SZ_Networks | Coexp_Module_black | 4097   | MAFG     |
| SZ_Networks | Coexp_Module_black | 10020  | GNE      |
| SZ_Networks | Coexp_Module_black | 5775   | PTPN4    |
| SZ_Networks | Coexp_Module_black | 4520   | MTF1     |
| SZ_Networks | Coexp_Module_black | 6728   | SRP19    |
| SZ_Networks | Coexp_Module_black | 8975   | USP13    |
| SZ_Networks | Coexp_Module_black | 10557  | RPP38    |
| SZ_Networks | Coexp_Module_black | 5608   | MAP2K6   |
| SZ_Networks | Coexp_Module_black | 8976   | WASL     |
| SZ_Networks | Coexp_Module_black | 8715   | NOL4     |
| SZ_Networks | Coexp_Module_black | 10203  | CALCRL   |
| SZ_Networks | Coexp_Module_black | 1850   | DUSP8    |
| SZ_Networks | Coexp_Module_black | 2892   | GRIA3    |
| SZ_Networks | Coexp_Module_black | 80264  | ZNF430   |
| SZ_Networks | Coexp_Module_black | 9203   | ZMYM3    |
| SZ_Networks | Coexp_Module_black | 57343  | ZNF304   |



|             |                    |        |          |
|-------------|--------------------|--------|----------|
| SZ_Networks | Coexp_Module_black | 9612   | NCOR2    |
| SZ_Networks | Coexp_Module_black | 55109  | AGGF1    |
| SZ_Networks | Coexp_Module_black | 6830   | SUPT6H   |
| SZ_Networks | Coexp_Module_black | 3746   | KCNC1    |
| SZ_Networks | Coexp_Module_black | 1983   | EIF5     |
| SZ_Networks | Coexp_Module_black | 24148  | PRPF6    |
| SZ_Networks | Coexp_Module_black | 8886   | DDX18    |
| SZ_Networks | Coexp_Module_black | 8669   | EIF3J    |
| SZ_Networks | Coexp_Module_black | 23705  | CADM1    |
| SZ_Networks | Coexp_Module_black | 10957  | PNRC1    |
| SZ_Networks | Coexp_Module_black | 9733   | SART3    |
| SZ_Networks | Coexp_Module_black | 9100   | USP10    |
| SZ_Networks | Coexp_Module_black | 5612   | PRKRIR   |
| SZ_Networks | Coexp_Module_black | 6602   | SMARCD1  |
| SZ_Networks | Coexp_Module_black | 8824   | CES2     |
| SZ_Networks | Coexp_Module_black | 11100  | HNRNPUL1 |
| SZ_Networks | Coexp_Module_black | 7112   | TMPO     |
| SZ_Networks | Coexp_Module_black | 10098  | TSPAN5   |
| SZ_Networks | Coexp_Module_black | 6314   | ATXN7    |
| SZ_Networks | Coexp_Module_black | 8774   | NAPG     |
| SZ_Networks | Coexp_Module_black | 51592  | TRIM33   |
| SZ_Networks | Coexp_Module_black | 9146   | HGS      |
| SZ_Networks | Coexp_Module_black | 10395  | DLC1     |
| SZ_Networks | Coexp_Module_black | 3745   | KCNB1    |
| SZ_Networks | Coexp_Module_black | 3795   | KHK      |
| SZ_Networks | Coexp_Module_black | 2137   | EXTL3    |
| SZ_Networks | Coexp_Module_black | 23451  | SF3B1    |
| SZ_Networks | Coexp_Module_black | 396    | ARHGDI1A |
| SZ_Networks | Coexp_Module_black | 2778   | GNAS     |
| SZ_Networks | Coexp_Module_black | 3320   | HSP90AA1 |
| SZ_Networks | Coexp_Module_black | 23214  | XPO6     |
| SZ_Networks | Coexp_Module_black | 23633  | KPNA6    |
| SZ_Networks | Coexp_Module_black | 57178  | ZMIZ1    |
| SZ_Networks | Coexp_Module_black | 8289   | ARID1A   |
| SZ_Networks | Coexp_Module_black | 55568  | GALNT10  |
| SZ_Networks | Coexp_Module_black | 26058  | GIGYF2   |
| SZ_Networks | Coexp_Module_black | 23512  | SUZ12    |
| SZ_Networks | Coexp_Module_black | 9522   | SCAMP1   |
| SZ_Networks | Coexp_Module_black | 6777   | STAT5B   |
| SZ_Networks | Coexp_Module_black | 23248  | RPRD2    |
| SZ_Networks | Coexp_Module_black | 57680  | CHD8     |
| SZ_Networks | Coexp_Module_black | 9716   | AQR      |
| SZ_Networks | Coexp_Module_black | 23001  | WDFY3    |
| SZ_Networks | Coexp_Module_black | 987    | LRBA     |
| SZ_Networks | Coexp_Module_black | 4684   | NCAM1    |
| SZ_Networks | Coexp_Module_black | 23637  | RABGAP1  |
| SZ_Networks | Coexp_Module_black | 221443 | OARD1    |
| SZ_Networks | Coexp_Module_black | 56929  | FEM1C    |
| SZ_Networks | Coexp_Module_black | 22930  | RAB3GAP1 |
| SZ_Networks | Coexp_Module_black | 10772  | SRSF10   |
| SZ_Networks | Coexp_Module_black | 3187   | HNRNPH1  |
| SZ_Networks | Coexp_Module_black | 221692 | PHACTR1  |
| SZ_Networks | Coexp_Module_black | 51099  | ABHD5    |
| SZ_Networks | Coexp_Module_black | 146057 | TTBK2    |
| SZ_Networks | Coexp_Module_black | 22902  | RUFY3    |
| SZ_Networks | Coexp_Module_black | 285282 | RABL3    |
| SZ_Networks | Coexp_Module_black | 11019  | LIAS     |
| SZ_Networks | Coexp_Module_black | 9554   | SEC22B   |

|             |                    |        |          |
|-------------|--------------------|--------|----------|
| SZ_Networks | Coexp_Module_black | 8496   | PPFIBP1  |
| SZ_Networks | Coexp_Module_black | 4045   | LSAMP    |
| SZ_Networks | Coexp_Module_black | 2734   | GLG1     |
| SZ_Networks | Coexp_Module_black | 1954   | MEGF8    |
| SZ_Networks | Coexp_Module_black | 221981 | THSD7A   |
| SZ_Networks | Coexp_Module_black | 4916   | NTRK3    |
| SZ_Networks | Coexp_Module_black | 55966  | AJAP1    |
| SZ_Networks | Coexp_Module_black | 9538   | EI24     |
| SZ_Networks | Coexp_Module_black | 5387   | PMS2P3   |
| SZ_Networks | Coexp_Module_black | 23253  | ANKRD12  |
| SZ_Networks | Coexp_Module_black | 10905  | MAN1A2   |
| SZ_Networks | Coexp_Module_black | 5928   | RBBP4    |
| SZ_Networks | Coexp_Module_black | 171392 | ZNF675   |
| SZ_Networks | Coexp_Module_black | 7529   | YWHAB    |
| SZ_Networks | Coexp_Module_black | 55737  | VPS35    |
| SZ_Networks | Coexp_Module_black | 51566  | ARMCX3   |
| SZ_Networks | Coexp_Module_black | 996    | CDC27    |
| SZ_Networks | Coexp_Module_black | 55705  | IPO9     |
| SZ_Networks | Coexp_Module_black | 28964  | GIT1     |
| SZ_Networks | Coexp_Module_black | 55660  | PRPF40A  |
| SZ_Networks | Coexp_Module_black | 64121  | RRAGC    |
| SZ_Networks | Coexp_Module_black | 56683  | C21orf59 |
| SZ_Networks | Coexp_Module_black | 51290  | ERGIC2   |
| SZ_Networks | Coexp_Module_black | 55745  | AP5M1    |
| SZ_Networks | Coexp_Module_black | 63893  | UBE2O    |
| SZ_Networks | Coexp_Module_black | 5202   | PFDN2    |
| SZ_Networks | Coexp_Module_black | 64062  | RBM26    |
| SZ_Networks | Coexp_Module_black | 79646  | PANK3    |
| SZ_Networks | Coexp_Module_black | 26015  | RPAP1    |
| SZ_Networks | Coexp_Module_black | 55284  | UBE2W    |
| SZ_Networks | Coexp_Module_black | 55781  | RIOK2    |
| SZ_Networks | Coexp_Module_black | 55847  | CISD1    |
| SZ_Networks | Coexp_Module_black | 79654  | HECTD3   |
| SZ_Networks | Coexp_Module_black | 55252  | ASXL2    |
| SZ_Networks | Coexp_Module_black | 55206  | SBNO1    |
| SZ_Networks | Coexp_Module_black | 51318  | MRPL35   |
| SZ_Networks | Coexp_Module_black | 55278  | QRSL1    |
| SZ_Networks | Coexp_Module_black | 4649   | MYO9A    |
| SZ_Networks | Coexp_Module_black | 54433  | GAR1     |
| SZ_Networks | Coexp_Module_black | 56947  | MFF      |
| SZ_Networks | Coexp_Module_black | 55279  | ZNF654   |
| SZ_Networks | Coexp_Module_black | 55112  | WDR60    |
| SZ_Networks | Coexp_Module_black | 64762  | GAREM    |
| SZ_Networks | Coexp_Module_black | 23536  | ADAT1    |
| SZ_Networks | Coexp_Module_black | 64084  | CLSTN2   |
| SZ_Networks | Coexp_Module_black | 29123  | ANKRD11  |
| SZ_Networks | Coexp_Module_black | 27087  | B3GAT1   |
| SZ_Networks | Coexp_Module_black | 51389  | RWDD1    |
| SZ_Networks | Coexp_Module_black | 51555  | PEX5L    |
| SZ_Networks | Coexp_Module_black | 51134  | CCDC41   |
| SZ_Networks | Coexp_Module_black | 56257  | MEPCE    |
| SZ_Networks | Coexp_Module_black | 11153  | FICD     |
| SZ_Networks | Coexp_Module_black | 7812   | CSDE1    |
| SZ_Networks | Coexp_Module_black | 79000  | AUNIP    |
| SZ_Networks | Coexp_Module_black | 79750  | ZNF385D  |
| SZ_Networks | Coexp_Module_black | 56660  | KCNK12   |
| SZ_Networks | Coexp_Module_black | 25769  | SLC24A2  |
| SZ_Networks | Coexp_Module_black | 60560  | NAA35    |

|             |                    |        |           |
|-------------|--------------------|--------|-----------|
| SZ_Networks | Coexp_Module_black | 58528  | RRAGD     |
| SZ_Networks | Coexp_Module_black | 55209  | SETD5     |
| SZ_Networks | Coexp_Module_black | 90806  | ANGEL2    |
| SZ_Networks | Coexp_Module_black | 55108  | BSDC1     |
| SZ_Networks | Coexp_Module_black | 9994   | CASP8AP2  |
| SZ_Networks | Coexp_Module_black | 5832   | ALDH18A1  |
| SZ_Networks | Coexp_Module_black | 9967   | THRAP3    |
| SZ_Networks | Coexp_Module_black | 55334  | SLC39A9   |
| SZ_Networks | Coexp_Module_black | 26060  | APPL1     |
| SZ_Networks | Coexp_Module_black | 65244  | SPATS2    |
| SZ_Networks | Coexp_Module_black | 79718  | TBL1XR1   |
| SZ_Networks | Coexp_Module_black | 55870  | ASH1L     |
| SZ_Networks | Coexp_Module_black | 28966  | SNX24     |
| SZ_Networks | Coexp_Module_black | 56919  | DHX33     |
| SZ_Networks | Coexp_Module_black | 9406   | ZRANB2    |
| SZ_Networks | Coexp_Module_black | 84187  | TMEM164   |
| SZ_Networks | Coexp_Module_black | 11244  | ZHX1      |
| SZ_Networks | Coexp_Module_black | 80851  | SH3BP5L   |
| SZ_Networks | Coexp_Module_black | 57106  | NAT14     |
| SZ_Networks | Coexp_Module_black | 84937  | ZNRF1     |
| SZ_Networks | Coexp_Module_black | 84260  | TCHP      |
| SZ_Networks | Coexp_Module_black | 54823  | SWT1      |
| SZ_Networks | Coexp_Module_black | 5522   | PPP2R2C   |
| SZ_Networks | Coexp_Module_black | 114880 | OSBPL6    |
| SZ_Networks | Coexp_Module_black | 2055   | CLN8      |
| SZ_Networks | Coexp_Module_black | 57533  | TBC1D14   |
| SZ_Networks | Coexp_Module_black | 219771 | CCNY      |
| SZ_Networks | Coexp_Module_black | 54467  | ANKIB1    |
| SZ_Networks | Coexp_Module_black | 389541 | LAMTOR4   |
| SZ_Networks | Coexp_Module_black | 90120  | C9orf69   |
| SZ_Networks | Coexp_Module_black | 80790  | CMIP      |
| SZ_Networks | Coexp_Module_black | 10640  | EXOC5     |
| SZ_Networks | Coexp_Module_black | 10152  | ABI2      |
| SZ_Networks | Coexp_Module_black | 55773  | TBC1D23   |
| SZ_Networks | Coexp_Module_black | 25871  | C3orf17   |
| SZ_Networks | Coexp_Module_black | 54439  | RBM27     |
| SZ_Networks | Coexp_Module_black | 10838  | ZNF275    |
| SZ_Networks | Coexp_Module_black | 57459  | GATAD2B   |
| SZ_Networks | Coexp_Module_black | 246184 | CDC26     |
| SZ_Networks | Coexp_Module_black | 9223   | MAG11     |
| SZ_Networks | Coexp_Module_black | 95681  | CEP41     |
| SZ_Networks | Coexp_Module_black | 124808 | CCDC43    |
| SZ_Networks | Coexp_Module_black | 4957   | ODF2      |
| SZ_Networks | Coexp_Module_black | 114327 | EFHC1     |
| SZ_Networks | Coexp_Module_black | 84440  | RAB11FIP4 |
| SZ_Networks | Coexp_Module_black | 619208 | FAM229B   |
| SZ_Networks | Coexp_Module_black | 26057  | ANKRD17   |
| SZ_Networks | Coexp_Module_black | 83636  | C19orf12  |
| SZ_Networks | Coexp_Module_black | 91748  | ELMSAN1   |
| SZ_Networks | Coexp_Module_black | 5599   | MAPK8     |
| SZ_Networks | Coexp_Module_black | 124245 | ZC3H18    |
| SZ_Networks | Coexp_Module_black | 93627  | TBCK      |
| SZ_Networks | Coexp_Module_black | 57455  | REXO1     |
| SZ_Networks | Coexp_Module_black | 9175   | MAP3K13   |
| SZ_Networks | Coexp_Module_black | 148867 | SLC30A7   |
| SZ_Networks | Coexp_Module_black | 84897  | TBRG1     |
| SZ_Networks | Coexp_Module_black | 80012  | PHC3      |
| SZ_Networks | Coexp_Module_black | 254225 | RNF169    |

|             |                    |        |           |
|-------------|--------------------|--------|-----------|
| SZ_Networks | Coexp_Module_black | 64282  | PAPD5     |
| SZ_Networks | Coexp_Module_black | 57706  | DENND1A   |
| SZ_Networks | Coexp_Module_black | 254170 | FBXO33    |
| SZ_Networks | Coexp_Module_black | 492311 | IGIP      |
| SZ_Networks | Coexp_Module_black | 10746  | MAP3K2    |
| SZ_Networks | Coexp_Module_black | 201266 | SLC39A11  |
| SZ_Networks | Coexp_Module_black | 64839  | FBXL17    |
| SZ_Networks | Coexp_Module_black | 143384 | CACUL1    |
| SZ_Networks | Coexp_Module_black | 2017   | CTTN      |
| SZ_Networks | Coexp_Module_black | 8085   | KMT2D     |
| SZ_Networks | Coexp_Module_black | 50863  | NTM       |
| SZ_Networks | Coexp_Module_black | 9589   | WTAP      |
| SZ_Networks | Coexp_Module_black | 112939 | NACC1     |
| SZ_Networks | Coexp_Module_black | 10180  | RBM6      |
| SZ_Networks | Coexp_Module_black | 5500   | PPP1CB    |
| SZ_Networks | Coexp_Module_black | 253260 | RICTOR    |
| SZ_Networks | Coexp_Module_black | 55153  | SDAD1     |
| SZ_Networks | Coexp_Module_black | 387893 | SETD8     |
| SZ_Networks | Coexp_Module_black | 51616  | TAF9B     |
| SZ_Networks | Coexp_Module_black | 199870 | FAM76A    |
| SZ_Networks | Coexp_Module_black | 7068   | THRB      |
| SZ_Networks | Coexp_Module_black | 11149  | BVES      |
| SZ_Networks | Coexp_Module_black | 92482  | BBIP1     |
| SZ_Networks | Coexp_Module_black | 1778   | DYNC1H1   |
| SZ_Networks | Coexp_Module_black | 6497   | SKI       |
| SZ_Networks | Coexp_Module_black | 54617  | INO80     |
| SZ_Networks | Coexp_Module_black | 55088  | C10orf118 |
| SZ_Networks | Coexp_Module_black | 5802   | PTPRS     |
| SZ_Networks | Coexp_Module_black | 55604  | LRRC16A   |
| SZ_Networks | Coexp_Module_black | 572558 | PGM5-AS1  |
| SZ_Networks | Coexp_Module_black | 151050 | KANSL1L   |
| SZ_Networks | Coexp_Module_black | 64132  | XYLT2     |
| SZ_Networks | Coexp_Module_black | 140707 | BRI3BP    |
| SZ_Networks | Coexp_Module_black | 57505  | AARS2     |
| SZ_Networks | Coexp_Module_black | 266722 | HS6ST3    |
| SZ_Networks | Coexp_Module_black | 2186   | BPTF      |
| SZ_Networks | Coexp_Module_black | 387104 | SOGA3     |
| SZ_Networks | Coexp_Module_black | 10168  | ZNF197    |
| SZ_Networks | Coexp_Module_black | 85865  | GTPBP10   |
| SZ_Networks | Coexp_Module_black | 140612 | ZFP28     |
| SZ_Networks | Coexp_Module_black | 4289   | MKLN1     |
| SZ_Networks | Coexp_Module_black | 645212 | EIF3J-AS1 |
| SZ_Networks | Coexp_Module_black | 653121 | ZBTB8A    |
| SZ_Networks | Coexp_Module_black | 139322 | APOOL     |
| SZ_Networks | Coexp_Module_black | 123263 | MTFMT     |
| SZ_Networks | Coexp_Module_black | 23567  | ZNF346    |
| SZ_Networks | Coexp_Module_black | 55183  | RIF1      |
| SZ_Networks | Coexp_Module_black | 401190 | RGS7BP    |
| SZ_Networks | Coexp_Module_black | 124411 | ZNF720    |
| SZ_Networks | Coexp_Module_black | 222236 | NAPEPLD   |
| SZ_Networks | Coexp_Module_black | 117177 | RAB3IP    |
| SZ_Networks | Coexp_Module_black | 153642 | ARSK      |
| SZ_Networks | Coexp_Module_black | 5289   | PIK3C3    |
| SZ_Networks | Coexp_Module_black | 84314  | TMEM107   |
| SZ_Networks | Coexp_Module_black | 286205 | SCAI      |
| SZ_Networks | Coexp_Module_black | 814    | CAMK4     |
| SZ_Networks | Coexp_Module_black | 55680  | RUFY2     |
| SZ_Networks | Coexp_Module_black | 163081 | ZNF567    |

|             |                    |        |           |
|-------------|--------------------|--------|-----------|
| SZ_Networks | Coexp_Module_black | 129563 | DIS3L2    |
| SZ_Networks | Coexp_Module_black | 673    | BRAF      |
| SZ_Networks | Coexp_Module_black | 7697   | ZNF138    |
| SZ_Networks | Coexp_Module_black | 7593   | MZF1      |
| SZ_Networks | Coexp_Module_black | 54662  | TBC1D13   |
| SZ_Networks | Coexp_Module_black | 79567  | FAM65A    |
| SZ_Networks | Coexp_Module_black | 90864  | SPSB3     |
| SZ_Networks | Coexp_Module_black | 54455  | FBXO42    |
| SZ_Networks | Coexp_Module_black | 57787  | MARK4     |
| SZ_Networks | Coexp_Module_red   | 130399 | ACVR1C    |
| SZ_Networks | Coexp_Module_red   | 90161  | HS6ST2    |
| SZ_Networks | Coexp_Module_red   | 440944 | SETD5-AS1 |
| SZ_Networks | Coexp_Module_red   | 2786   | GNG4      |
| SZ_Networks | Coexp_Module_red   | 26036  | ZNF451    |
| SZ_Networks | Coexp_Module_red   | 114784 | CSMD2     |
| SZ_Networks | Coexp_Module_red   | 283521 | LINC00282 |
| SZ_Networks | Coexp_Module_red   | 6991   | TCTE3     |
| SZ_Networks | Coexp_Module_red   | 64788  | LMF1      |
| SZ_Networks | Coexp_Module_red   | 6746   | SSR2      |
| SZ_Networks | Coexp_Module_red   | 3337   | DNAJB1    |
| SZ_Networks | Coexp_Module_red   | 2280   | FKBP1A    |
| SZ_Networks | Coexp_Module_red   | 3303   | HSPA1A    |
| SZ_Networks | Coexp_Module_red   | 3329   | HSPD1     |
| SZ_Networks | Coexp_Module_red   | 9611   | NCOR1     |
| SZ_Networks | Coexp_Module_red   | 2288   | FKBP4     |
| SZ_Networks | Coexp_Module_red   | 6386   | SDCBP     |
| SZ_Networks | Coexp_Module_red   | 10904  | BLCAP     |
| SZ_Networks | Coexp_Module_red   | 5954   | RCN1      |
| SZ_Networks | Coexp_Module_red   | 54386  | TERF2IP   |
| SZ_Networks | Coexp_Module_red   | 10625  | IVNS1ABP  |
| SZ_Networks | Coexp_Module_red   | 9868   | TOMM70A   |
| SZ_Networks | Coexp_Module_red   | 8667   | EIF3H     |
| SZ_Networks | Coexp_Module_red   | 8165   | AKAP1     |
| SZ_Networks | Coexp_Module_red   | 5514   | PPP1R10   |
| SZ_Networks | Coexp_Module_red   | 6626   | SNRPA     |
| SZ_Networks | Coexp_Module_red   | 3315   | HSPB1     |
| SZ_Networks | Coexp_Module_red   | 10953  | TOMM34    |
| SZ_Networks | Coexp_Module_red   | 80347  | COASY     |
| SZ_Networks | Coexp_Module_red   | 29889  | GNL2      |
| SZ_Networks | Coexp_Module_red   | 10422  | UBAC1     |
| SZ_Networks | Coexp_Module_red   | 8450   | CUL4B     |
| SZ_Networks | Coexp_Module_red   | 10221  | TRIB1     |
| SZ_Networks | Coexp_Module_red   | 26037  | SIPA1L1   |
| SZ_Networks | Coexp_Module_red   | 4522   | MTHFD1    |
| SZ_Networks | Coexp_Module_red   | 613    | BCR       |
| SZ_Networks | Coexp_Module_red   | 10007  | GNPDA1    |
| SZ_Networks | Coexp_Module_red   | 5997   | RGS2      |
| SZ_Networks | Coexp_Module_red   | 23640  | HSPBP1    |
| SZ_Networks | Coexp_Module_red   | 9663   | LPIN2     |
| SZ_Networks | Coexp_Module_red   | 402    | ARL2      |
| SZ_Networks | Coexp_Module_red   | 7873   | MANF      |
| SZ_Networks | Coexp_Module_red   | 9263   | STK17A    |
| SZ_Networks | Coexp_Module_red   | 7726   | TRIM26    |
| SZ_Networks | Coexp_Module_red   | 8974   | P4HA2     |
| SZ_Networks | Coexp_Module_red   | 9475   | ROCK2     |
| SZ_Networks | Coexp_Module_red   | 7750   | ZMYM2     |
| SZ_Networks | Coexp_Module_red   | 1627   | DBN1      |
| SZ_Networks | Coexp_Module_red   | 54541  | DDIT4     |

|             |                  |       |          |
|-------------|------------------|-------|----------|
| SZ_Networks | Coexp_Module_red | 9672  | SDC3     |
| SZ_Networks | Coexp_Module_red | 7466  | WFS1     |
| SZ_Networks | Coexp_Module_red | 5326  | PLAGL2   |
| SZ_Networks | Coexp_Module_red | 3632  | INPP5A   |
| SZ_Networks | Coexp_Module_red | 51363 | CHST15   |
| SZ_Networks | Coexp_Module_red | 1612  | DAPK1    |
| SZ_Networks | Coexp_Module_red | 10615 | SPAG5    |
| SZ_Networks | Coexp_Module_red | 10244 | RABEPK   |
| SZ_Networks | Coexp_Module_red | 4728  | NDUFS8   |
| SZ_Networks | Coexp_Module_red | 10263 | CDK2AP2  |
| SZ_Networks | Coexp_Module_red | 4850  | CNOT4    |
| SZ_Networks | Coexp_Module_red | 3720  | JARID2   |
| SZ_Networks | Coexp_Module_red | 22850 | ADNP2    |
| SZ_Networks | Coexp_Module_red | 2119  | ETV5     |
| SZ_Networks | Coexp_Module_red | 7162  | TPBG     |
| SZ_Networks | Coexp_Module_red | 54726 | OTUD4    |
| SZ_Networks | Coexp_Module_red | 4023  | LPL      |
| SZ_Networks | Coexp_Module_red | 5092  | PCBD1    |
| SZ_Networks | Coexp_Module_red | 9658  | ZNF516   |
| SZ_Networks | Coexp_Module_red | 5116  | PCNT     |
| SZ_Networks | Coexp_Module_red | 4350  | MPG      |
| SZ_Networks | Coexp_Module_red | 9828  | ARHGEF17 |
| SZ_Networks | Coexp_Module_red | 11080 | DNAJB4   |
| SZ_Networks | Coexp_Module_red | 4217  | MAP3K5   |
| SZ_Networks | Coexp_Module_red | 5909  | RAP1GAP  |
| SZ_Networks | Coexp_Module_red | 22880 | MORC2    |
| SZ_Networks | Coexp_Module_red | 9781  | RNF144A  |
| SZ_Networks | Coexp_Module_red | 5090  | PBX3     |
| SZ_Networks | Coexp_Module_red | 6604  | SMARCD3  |
| SZ_Networks | Coexp_Module_red | 5138  | PDE2A    |
| SZ_Networks | Coexp_Module_red | 10432 | RBM14    |
| SZ_Networks | Coexp_Module_red | 10208 | USPL1    |
| SZ_Networks | Coexp_Module_red | 10926 | DBF4     |
| SZ_Networks | Coexp_Module_red | 7188  | TRAF5    |
| SZ_Networks | Coexp_Module_red | 341   | APOC1    |
| SZ_Networks | Coexp_Module_red | 9825  | SPATA2   |
| SZ_Networks | Coexp_Module_red | 7862  | BRPF1    |
| SZ_Networks | Coexp_Module_red | 115   | ADCY9    |
| SZ_Networks | Coexp_Module_red | 2009  | EML1     |
| SZ_Networks | Coexp_Module_red | 9254  | CACNA2D2 |
| SZ_Networks | Coexp_Module_red | 2245  | FGD1     |
| SZ_Networks | Coexp_Module_red | 7091  | TLE4     |
| SZ_Networks | Coexp_Module_red | 6664  | SOX11    |
| SZ_Networks | Coexp_Module_red | 4300  | MLLT3    |
| SZ_Networks | Coexp_Module_red | 55922 | NKRF     |
| SZ_Networks | Coexp_Module_red | 3815  | KIT      |
| SZ_Networks | Coexp_Module_red | 3682  | ITGAE    |
| SZ_Networks | Coexp_Module_red | 5915  | RARB     |
| SZ_Networks | Coexp_Module_red | 10090 | UST      |
| SZ_Networks | Coexp_Module_red | 41    | ASIC1    |
| SZ_Networks | Coexp_Module_red | 4330  | MN1      |
| SZ_Networks | Coexp_Module_red | 744   | MPPED2   |
| SZ_Networks | Coexp_Module_red | 3208  | HPCA     |
| SZ_Networks | Coexp_Module_red | 5502  | PPP1R1A  |
| SZ_Networks | Coexp_Module_red | 10570 | DPYSL4   |
| SZ_Networks | Coexp_Module_red | 22824 | HSPA4L   |
| SZ_Networks | Coexp_Module_red | 5121  | PCP4     |
| SZ_Networks | Coexp_Module_red | 793   | CALB1    |

|             |                  |        |         |
|-------------|------------------|--------|---------|
| SZ_Networks | Coexp_Module_red | 27253  | PCDH17  |
| SZ_Networks | Coexp_Module_red | 1730   | DIAPH2  |
| SZ_Networks | Coexp_Module_red | 5587   | PRKD1   |
| SZ_Networks | Coexp_Module_red | 5649   | RELN    |
| SZ_Networks | Coexp_Module_red | 6258   | RXRG    |
| SZ_Networks | Coexp_Module_red | 9365   | KL      |
| SZ_Networks | Coexp_Module_red | 956    | ENTPD3  |
| SZ_Networks | Coexp_Module_red | 2774   | GNAL    |
| SZ_Networks | Coexp_Module_red | 8853   | ASAP2   |
| SZ_Networks | Coexp_Module_red | 3642   | INSM1   |
| SZ_Networks | Coexp_Module_red | 8787   | RGS9    |
| SZ_Networks | Coexp_Module_red | 6863   | TAC1    |
| SZ_Networks | Coexp_Module_red | 6496   | SIX3    |
| SZ_Networks | Coexp_Module_red | 3759   | KCNJ2   |
| SZ_Networks | Coexp_Module_red | 5021   | OXTR    |
| SZ_Networks | Coexp_Module_red | 10808  | HSPH1   |
| SZ_Networks | Coexp_Module_red | 3751   | KCND2   |
| SZ_Networks | Coexp_Module_red | 1009   | CDH11   |
| SZ_Networks | Coexp_Module_red | 2842   | GPR19   |
| SZ_Networks | Coexp_Module_red | 3358   | HTR2C   |
| SZ_Networks | Coexp_Module_red | 4212   | MEIS2   |
| SZ_Networks | Coexp_Module_red | 5033   | P4HA1   |
| SZ_Networks | Coexp_Module_red | 3360   | HTR4    |
| SZ_Networks | Coexp_Module_red | 22981  | NINL    |
| SZ_Networks | Coexp_Module_red | 9921   | RNF10   |
| SZ_Networks | Coexp_Module_red | 10296  | MAEA    |
| SZ_Networks | Coexp_Module_red | 9519   | TBPL1   |
| SZ_Networks | Coexp_Module_red | 87     | ACTN1   |
| SZ_Networks | Coexp_Module_red | 23344  | ESYT1   |
| SZ_Networks | Coexp_Module_red | 7150   | TOP1    |
| SZ_Networks | Coexp_Module_red | 5447   | POR     |
| SZ_Networks | Coexp_Module_red | 10262  | SF3B4   |
| SZ_Networks | Coexp_Module_red | 55651  | NHP2    |
| SZ_Networks | Coexp_Module_red | 1729   | DIAPH1  |
| SZ_Networks | Coexp_Module_red | 688    | KLF5    |
| SZ_Networks | Coexp_Module_red | 8408   | ULK1    |
| SZ_Networks | Coexp_Module_red | 2887   | GRB10   |
| SZ_Networks | Coexp_Module_red | 23345  | SYNE1   |
| SZ_Networks | Coexp_Module_red | 23154  | NCDN    |
| SZ_Networks | Coexp_Module_red | 10391  | CORO2B  |
| SZ_Networks | Coexp_Module_red | 9750   | FAM65B  |
| SZ_Networks | Coexp_Module_red | 54674  | LRRN3   |
| SZ_Networks | Coexp_Module_red | 8815   | BANF1   |
| SZ_Networks | Coexp_Module_red | 8648   | NCOA1   |
| SZ_Networks | Coexp_Module_red | 6328   | SCN3A   |
| SZ_Networks | Coexp_Module_red | 10899  | JTB     |
| SZ_Networks | Coexp_Module_red | 2172   | FABP6   |
| SZ_Networks | Coexp_Module_red | 27101  | CACYBP  |
| SZ_Networks | Coexp_Module_red | 23089  | PEG10   |
| SZ_Networks | Coexp_Module_red | 23028  | KDM1A   |
| SZ_Networks | Coexp_Module_red | 271    | AMPD2   |
| SZ_Networks | Coexp_Module_red | 51029  | DESI2   |
| SZ_Networks | Coexp_Module_red | 439921 | MXRA7   |
| SZ_Networks | Coexp_Module_red | 10252  | SPRY1   |
| SZ_Networks | Coexp_Module_red | 114882 | OSBPL8  |
| SZ_Networks | Coexp_Module_red | 26053  | AUTS2   |
| SZ_Networks | Coexp_Module_red | 23180  | RFTN1   |
| SZ_Networks | Coexp_Module_red | 23174  | ZCCHC14 |

|             |                  |        |           |
|-------------|------------------|--------|-----------|
| SZ_Networks | Coexp_Module_red | 22907  | DHX30     |
| SZ_Networks | Coexp_Module_red | 55818  | KDM3A     |
| SZ_Networks | Coexp_Module_red | 23195  | MDN1      |
| SZ_Networks | Coexp_Module_red | 23210  | JMJD6     |
| SZ_Networks | Coexp_Module_red | 23271  | CAMSAP2   |
| SZ_Networks | Coexp_Module_red | 221061 | FAM171A1  |
| SZ_Networks | Coexp_Module_red | 4665   | NAB2      |
| SZ_Networks | Coexp_Module_red | 23268  | DNMBP     |
| SZ_Networks | Coexp_Module_red | 6942   | TCF20     |
| SZ_Networks | Coexp_Module_red | 5986   | RFNG      |
| SZ_Networks | Coexp_Module_red | 3265   | HRAS      |
| SZ_Networks | Coexp_Module_red | 23286  | WWC1      |
| SZ_Networks | Coexp_Module_red | 7074   | TIAM1     |
| SZ_Networks | Coexp_Module_red | 144699 | FBXL14    |
| SZ_Networks | Coexp_Module_red | 6091   | ROBO1     |
| SZ_Networks | Coexp_Module_red | 9881   | TRANK1    |
| SZ_Networks | Coexp_Module_red | 57146  | TMEM159   |
| SZ_Networks | Coexp_Module_red | 26011  | TENM4     |
| SZ_Networks | Coexp_Module_red | 25907  | TMEM158   |
| SZ_Networks | Coexp_Module_red | 23023  | TMCC1     |
| SZ_Networks | Coexp_Module_red | 26098  | C10orf137 |
| SZ_Networks | Coexp_Module_red | 4862   | NPAS2     |
| SZ_Networks | Coexp_Module_red | 8153   | RND2      |
| SZ_Networks | Coexp_Module_red | 5179   | PENK      |
| SZ_Networks | Coexp_Module_red | 51491  | NOP16     |
| SZ_Networks | Coexp_Module_red | 9260   | PDLIM7    |
| SZ_Networks | Coexp_Module_red | 2138   | EYA1      |
| SZ_Networks | Coexp_Module_red | 168544 | ZNF467    |
| SZ_Networks | Coexp_Module_red | 157627 | LINC00599 |
| SZ_Networks | Coexp_Module_red | 9508   | ADAMTS3   |
| SZ_Networks | Coexp_Module_red | 54874  | FNBP1L    |
| SZ_Networks | Coexp_Module_red | 63982  | ANO3      |
| SZ_Networks | Coexp_Module_red | 10474  | TADA3     |
| SZ_Networks | Coexp_Module_red | 9077   | DIRAS3    |
| SZ_Networks | Coexp_Module_red | 23085  | ERC1      |
| SZ_Networks | Coexp_Module_red | 91752  | ZNF804A   |
| SZ_Networks | Coexp_Module_red | 771    | CA12      |
| SZ_Networks | Coexp_Module_red | 22987  | SV2C      |
| SZ_Networks | Coexp_Module_red | 25876  | SPEF1     |
| SZ_Networks | Coexp_Module_red | 1813   | DRD2      |
| SZ_Networks | Coexp_Module_red | 23178  | PASK      |
| SZ_Networks | Coexp_Module_red | 51108  | METTL9    |
| SZ_Networks | Coexp_Module_red | 9531   | BAG3      |
| SZ_Networks | Coexp_Module_red | 55505  | NOP10     |
| SZ_Networks | Coexp_Module_red | 22822  | PHLDA1    |
| SZ_Networks | Coexp_Module_red | 5763   | PTMS      |
| SZ_Networks | Coexp_Module_red | 29099  | COMMD9    |
| SZ_Networks | Coexp_Module_red | 51447  | IP6K2     |
| SZ_Networks | Coexp_Module_red | 2872   | MKNK2     |
| SZ_Networks | Coexp_Module_red | 4088   | SMAD3     |
| SZ_Networks | Coexp_Module_red | 57162  | PELI1     |
| SZ_Networks | Coexp_Module_red | 54539  | NDUFB11   |
| SZ_Networks | Coexp_Module_red | 23589  | CARHSP1   |
| SZ_Networks | Coexp_Module_red | 54994  | GID8      |
| SZ_Networks | Coexp_Module_red | 65981  | CAPRIN2   |
| SZ_Networks | Coexp_Module_red | 79960  | PHF17     |
| SZ_Networks | Coexp_Module_red | 29098  | RANGRF    |
| SZ_Networks | Coexp_Module_red | 4696   | NDUFA3    |



|             |                  |        |          |
|-------------|------------------|--------|----------|
| SZ_Networks | Coexp_Module_red | 26973  | CHORDC1  |
| SZ_Networks | Coexp_Module_red | 51278  | IER5     |
| SZ_Networks | Coexp_Module_red | 80324  | PUS1     |
| SZ_Networks | Coexp_Module_red | 55167  | MSL2     |
| SZ_Networks | Coexp_Module_red | 5583   | PRKCH    |
| SZ_Networks | Coexp_Module_red | 54997  | TESC     |
| SZ_Networks | Coexp_Module_red | 10885  | WDR3     |
| SZ_Networks | Coexp_Module_red | 55178  | RNMTL1   |
| SZ_Networks | Coexp_Module_red | 79675  | FASTKD1  |
| SZ_Networks | Coexp_Module_red | 60526  | C2orf43  |
| SZ_Networks | Coexp_Module_red | 57419  | SLC24A3  |
| SZ_Networks | Coexp_Module_red | 79039  | DDX54    |
| SZ_Networks | Coexp_Module_red | 54980  | C2orf42  |
| SZ_Networks | Coexp_Module_red | 11275  | KLHL2    |
| SZ_Networks | Coexp_Module_red | 79589  | RNF128   |
| SZ_Networks | Coexp_Module_red | 54839  | LRRC49   |
| SZ_Networks | Coexp_Module_red | 79612  | NAA16    |
| SZ_Networks | Coexp_Module_red | 55076  | TMEM45A  |
| SZ_Networks | Coexp_Module_red | 55188  | RIC8B    |
| SZ_Networks | Coexp_Module_red | 24141  | LAMP5    |
| SZ_Networks | Coexp_Module_red | 26511  | CHIC2    |
| SZ_Networks | Coexp_Module_red | 9627   | SNCAIP   |
| SZ_Networks | Coexp_Module_red | 80758  | PRR7     |
| SZ_Networks | Coexp_Module_red | 79776  | ZFHX4    |
| SZ_Networks | Coexp_Module_red | 7561   | ZNF14    |
| SZ_Networks | Coexp_Module_red | 54971  | BANP     |
| SZ_Networks | Coexp_Module_red | 51334  | PRR16    |
| SZ_Networks | Coexp_Module_red | 79772  | MCTP1    |
| SZ_Networks | Coexp_Module_red | 26507  | CNNM1    |
| SZ_Networks | Coexp_Module_red | 55791  | LRIF1    |
| SZ_Networks | Coexp_Module_red | 54112  | GPR88    |
| SZ_Networks | Coexp_Module_red | 10858  | CYP46A1  |
| SZ_Networks | Coexp_Module_red | 10777  | ARPP21   |
| SZ_Networks | Coexp_Module_red | 51078  | THAP4    |
| SZ_Networks | Coexp_Module_red | 9348   | NDST3    |
| SZ_Networks | Coexp_Module_red | 84187  | TMEM164  |
| SZ_Networks | Coexp_Module_red | 51347  | TAOK3    |
| SZ_Networks | Coexp_Module_red | 63920  | C5orf54  |
| SZ_Networks | Coexp_Module_red | 112398 | EGLN2    |
| SZ_Networks | Coexp_Module_red | 26249  | KLHL3    |
| SZ_Networks | Coexp_Module_red | 60468  | BACH2    |
| SZ_Networks | Coexp_Module_red | 81558  | FAM117A  |
| SZ_Networks | Coexp_Module_red | 83480  | PUS3     |
| SZ_Networks | Coexp_Module_red | 55769  | ZNF83    |
| SZ_Networks | Coexp_Module_red | 4121   | MAN1A1   |
| SZ_Networks | Coexp_Module_red | 55603  | FAM46A   |
| SZ_Networks | Coexp_Module_red | 5128   | CDK17    |
| SZ_Networks | Coexp_Module_red | 56937  | PMEPA1   |
| SZ_Networks | Coexp_Module_red | 54836  | BSPRY    |
| SZ_Networks | Coexp_Module_red | 64776  | C11orf1  |
| SZ_Networks | Coexp_Module_red | 10678  | B3GNT2   |
| SZ_Networks | Coexp_Module_red | 55654  | TMEM127  |
| SZ_Networks | Coexp_Module_red | 64919  | BCL11B   |
| SZ_Networks | Coexp_Module_red | 51602  | NOP58    |
| SZ_Networks | Coexp_Module_red | 57189  | KIAA1147 |
| SZ_Networks | Coexp_Module_red | 83605  | CCM2     |
| SZ_Networks | Coexp_Module_red | 9069   | CLDN12   |
| SZ_Networks | Coexp_Module_red | 10194  | TSHZ1    |

|             |                  |        |          |
|-------------|------------------|--------|----------|
| SZ_Networks | Coexp_Module_red | 51061  | TXNDC11  |
| SZ_Networks | Coexp_Module_red | 65977  | PLEKHA3  |
| SZ_Networks | Coexp_Module_red | 84062  | DTNBP1   |
| SZ_Networks | Coexp_Module_red | 91574  | C12orf65 |
| SZ_Networks | Coexp_Module_red | 93611  | FBXO44   |
| SZ_Networks | Coexp_Module_red | 23551  | RASD2    |
| SZ_Networks | Coexp_Module_red | 30819  | KCNIP2   |
| SZ_Networks | Coexp_Module_red | 83698  | CALN1    |
| SZ_Networks | Coexp_Module_red | 56181  | MTFR1L   |
| SZ_Networks | Coexp_Module_red | 64979  | MRPL36   |
| SZ_Networks | Coexp_Module_red | 91151  | TIGD7    |
| SZ_Networks | Coexp_Module_red | 9616   | RNF7     |
| SZ_Networks | Coexp_Module_red | 84299  | MIEN1    |
| SZ_Networks | Coexp_Module_red | 92181  | UBTD2    |
| SZ_Networks | Coexp_Module_red | 80315  | CPEB4    |
| SZ_Networks | Coexp_Module_red | 27086  | FOXP1    |
| SZ_Networks | Coexp_Module_red | 1021   | CDK6     |
| SZ_Networks | Coexp_Module_red | 2035   | EPB41    |
| SZ_Networks | Coexp_Module_red | 55466  | DNAJA4   |
| SZ_Networks | Coexp_Module_red | 85364  | ZCCHC3   |
| SZ_Networks | Coexp_Module_red | 7402   | UTRN     |
| SZ_Networks | Coexp_Module_red | 84152  | PPP1R1B  |
| SZ_Networks | Coexp_Module_red | 7871   | SLMAP    |
| SZ_Networks | Coexp_Module_red | 57038  | RARS2    |
| SZ_Networks | Coexp_Module_red | 11057  | ABHD2    |
| SZ_Networks | Coexp_Module_red | 80314  | EPC1     |
| SZ_Networks | Coexp_Module_red | 162989 | DEDD2    |
| SZ_Networks | Coexp_Module_red | 55802  | DCP1A    |
| SZ_Networks | Coexp_Module_red | 85379  | KIAA1671 |
| SZ_Networks | Coexp_Module_red | 51434  | ANAPC7   |
| SZ_Networks | Coexp_Module_red | 57685  | CACHD1   |
| SZ_Networks | Coexp_Module_red | 150275 | CCDC117  |
| SZ_Networks | Coexp_Module_red | 8470   | SORBS2   |
| SZ_Networks | Coexp_Module_red | 11320  | MGAT4A   |
| SZ_Networks | Coexp_Module_red | 80818  | ZNF436   |
| SZ_Networks | Coexp_Module_red | 80144  | FRAS1    |
| SZ_Networks | Coexp_Module_red | 221504 | ZBTB9    |
| SZ_Networks | Coexp_Module_red | 2140   | EYA3     |
| SZ_Networks | Coexp_Module_red | 51312  | SLC25A37 |
| SZ_Networks | Coexp_Module_red | 112752 | IFT43    |
| SZ_Networks | Coexp_Module_red | 57688  | ZSWIM6   |
| SZ_Networks | Coexp_Module_red | 93624  | TADA2B   |
| SZ_Networks | Coexp_Module_red | 284252 | KCTD1    |
| SZ_Networks | Coexp_Module_red | 122953 | JDP2     |
| SZ_Networks | Coexp_Module_red | 4084   | MXD1     |
| SZ_Networks | Coexp_Module_red | 57555  | NLGN2    |
| SZ_Networks | Coexp_Module_red | 80311  | KLHL15   |
| SZ_Networks | Coexp_Module_red | 50515  | CHST11   |
| SZ_Networks | Coexp_Module_red | 120534 | ARL14EP  |
| SZ_Networks | Coexp_Module_red | 222194 | RSBN1L   |
| SZ_Networks | Coexp_Module_red | 57687  | VAT1L    |
| SZ_Networks | Coexp_Module_red | 81559  | TRIM11   |
| SZ_Networks | Coexp_Module_red | 25925  | ZNF521   |
| SZ_Networks | Coexp_Module_red | 79817  | MOB3B    |
| SZ_Networks | Coexp_Module_red | 139818 | DOCK11   |
| SZ_Networks | Coexp_Module_red | 57633  | LRRN1    |
| SZ_Networks | Coexp_Module_red | 57168  | ASPHD2   |
| SZ_Networks | Coexp_Module_red | 441212 | RP9P     |

|             |                  |           |           |
|-------------|------------------|-----------|-----------|
| SZ_Networks | Coexp_Module_red | 201164    | PLD6      |
| SZ_Networks | Coexp_Module_red | 80110     | ZNF614    |
| SZ_Networks | Coexp_Module_red | 145173    | B3GALT    |
| SZ_Networks | Coexp_Module_red | 169714    | QSOX2     |
| SZ_Networks | Coexp_Module_red | 119391    | GSTO2     |
| SZ_Networks | Coexp_Module_red | 348801    | LNP1      |
| SZ_Networks | Coexp_Module_red | 57699     | CPNE5     |
| SZ_Networks | Coexp_Module_red | 84858     | ZNF503    |
| SZ_Networks | Coexp_Module_red | 440193    | CCDC88C   |
| SZ_Networks | Coexp_Module_red | 2982      | GUCY1A3   |
| SZ_Networks | Coexp_Module_red | 22979     | EFR3B     |
| SZ_Networks | Coexp_Module_red | 148523    | C1orf51   |
| SZ_Networks | Coexp_Module_red | 100499467 | LINC00673 |
| SZ_Networks | Coexp_Module_red | 203522    | DDX26B    |
| SZ_Networks | Coexp_Module_red | 113263    | GLCCI1    |
| SZ_Networks | Coexp_Module_red | 50937     | CDON      |
| SZ_Networks | Coexp_Module_red | 91833     | WDR20     |
| SZ_Networks | Coexp_Module_red | 2674      | GFRA1     |
| SZ_Networks | Coexp_Module_red | 100131997 | FAM27E3   |
| SZ_Networks | Coexp_Module_red | 5618      | PRLR      |
| SZ_Networks | Coexp_Module_red | 57484     | RNF150    |
| SZ_Networks | Coexp_Module_red | 57631     | LRCH2     |
| SZ_Networks | Coexp_Module_red | 7770      | ZNF227    |
| SZ_Networks | Coexp_Module_red | 90293     | KLHL13    |
| SZ_Networks | Coexp_Module_red | 170394    | PWWP2B    |
| SZ_Networks | Coexp_Module_red | 152485    | ZNF827    |
| SZ_Networks | Coexp_Module_red | 115265    | DDIT4L    |
| SZ_Networks | Coexp_Module_red | 349565    | NMNAT3    |
| SZ_Networks | Coexp_Module_red | 9678      | PHF14     |
| SZ_Networks | Coexp_Module_red | 404217    | CTXN1     |
| SZ_Networks | Coexp_Module_red | 154743    | C7orf60   |
| SZ_Networks | Coexp_Module_red | 111       | ADCY5     |
| SZ_Networks | Coexp_Module_red | 114815    | SORCS1    |
| SZ_Networks | Coexp_Module_red | 375748    | ERCC6L2   |
| SZ_Networks | Coexp_Module_red | 389362    | PSMG4     |
| SZ_Networks | Coexp_Module_red | 92092     | ZC3HAV1L  |
| SZ_Networks | Coexp_Module_red | 57575     | PCDH10    |
| SZ_Networks | Coexp_Module_red | 90362     | FAM110B   |
| SZ_Networks | Coexp_Module_red | 2788      | GNG7      |
| SZ_Networks | Coexp_Module_red | 1602      | DACH1     |
| SZ_Networks | Coexp_Module_red | 84688     | C9orf24   |
| SZ_Networks | Coexp_Module_red | 196294    | IMMP1L    |
| SZ_Networks | Coexp_Module_red | 9671      | WSCD2     |
| SZ_Networks | Coexp_Module_red | 80325     | ABTB1     |
| SZ_Networks | Coexp_Module_red | 23765     | IL17RA    |
| SZ_Networks | Coexp_Module_red | 9099      | USP2      |
| SZ_Networks | Coexp_Module_red | 84456     | L3MBTL3   |
| SZ_Networks | Coexp_Module_red | 26207     | PITPNC1   |
| SZ_Networks | Coexp_Module_red | 124925    | SEZ6      |
| SZ_Networks | Coexp_Module_red | 55552     | ZNF823    |
| SZ_Networks | Coexp_Module_red | 283174    | MIR4697HG |
| SZ_Networks | Coexp_Module_red | 4986      | OPRK1     |
| SZ_Networks | Coexp_Module_red | 374887    | YJEFN3    |
| SZ_Networks | Coexp_Module_red | 89765     | RSPH1     |
| SZ_Networks | Coexp_Module_red | 27115     | PDE7B     |
| SZ_Networks | Coexp_Module_red | 55707     | NECAP2    |
| SZ_Networks | Coexp_Module_red | 134548    | SOWAHA    |
| SZ_Networks | Coexp_Module_red | 51046     | ST8SIA3   |

|             |                    |        |           |
|-------------|--------------------|--------|-----------|
| SZ_Networks | Coexp_Module_red   | 132204 | SYNPR     |
| SZ_Networks | Coexp_Module_red   | 6654   | SOS1      |
| SZ_Networks | Coexp_Module_red   | 56256  | SERTAD4   |
| SZ_Networks | Coexp_Module_red   | 10717  | AP4B1     |
| SZ_Networks | Coexp_Module_red   | 57464  | STRIP2    |
| SZ_Networks | Coexp_Module_red   | 90075  | ZNF30     |
| SZ_Networks | Coexp_Module_red   | 57512  | GPR158    |
| SZ_Networks | Coexp_Module_red   | 83875  | BCO2      |
| SZ_Networks | Coexp_Module_red   | 79925  | SPEF2     |
| SZ_Networks | Coexp_Module_red   | 54890  | ALKBH5    |
| SZ_Networks | Coexp_Module_red   | 57186  | RALGAPA2  |
| SZ_Networks | Coexp_Module_red   | 140733 | MACROD2   |
| SZ_Networks | Coexp_Module_red   | 84750  | FUT10     |
| SZ_Networks | Coexp_Module_red   | 124961 | ZFP3      |
| SZ_Networks | Coexp_Module_red   | 120114 | FAT3      |
| SZ_Networks | Coexp_Module_red   | 6330   | SCN4B     |
| SZ_Networks | Coexp_Module_red   | 84867  | PTPN5     |
| SZ_Networks | Coexp_Module_red   | 646113 | LINC00643 |
| SZ_Networks | Coexp_Module_red   | 441054 | C4orf47   |
| SZ_Networks | Coexp_Module_red   | 197259 | MLKL      |
| SZ_Networks | Coexp_Module_red   | 79056  | PRRG4     |
| SZ_Networks | Coexp_Module_red   | 282996 | RBM20     |
| SZ_Networks | Coexp_Module_red   | 347730 | LRRTM1    |
| SZ_Networks | Coexp_Module_red   | 4842   | NOS1      |
| SZ_Networks | Coexp_Module_red   | 147947 | ZNF542    |
| SZ_Networks | Coexp_Module_red   | 441061 | MARCH11   |
| SZ_Networks | Coexp_Module_red   | 386618 | KCTD4     |
| SZ_Networks | Coexp_Module_red   | 114788 | CSMD3     |
| SZ_Networks | Coexp_Module_red   | 84623  | KIRREL3   |
| SZ_Networks | Coexp_Module_red   | 222537 | HS3ST5    |
| SZ_Networks | Coexp_Module_red   | 140679 | SLC32A1   |
| SZ_Networks | Coexp_Module_red   | 654790 | PCP4L1    |
| SZ_Networks | Coexp_Module_red   | 149297 | FAM78B    |
| SZ_Networks | Coexp_Module_red   | 284370 | ZNF615    |
| SZ_Networks | Coexp_Module_red   | 94122  | SYTL5     |
| SZ_Networks | Coexp_Module_red   | 1750   | DLX6      |
| SZ_Networks | Coexp_Module_red   | 148281 | SYT6      |
| SZ_Networks | Coexp_Module_red   | 642938 | FAM196A   |
| SZ_Networks | Coexp_Module_red   | 85397  | RGS8      |
| SZ_Networks | Coexp_Module_red   | 54555  | DDX49     |
| SZ_Networks | Coexp_Module_red   | 7067   | THRA      |
| SZ_Networks | Coexp_Module_red   | 10636  | RGS14     |
| SZ_Networks | Coexp_Module_red   | 23462  | HEY1      |
| SZ_Networks | Coexp_Module_red   | 79903  | NAA60     |
| SZ_Networks | Coexp_Module_red   | 84861  | KLHL22    |
| SZ_Networks | Coexp_Module_red   | 54976  | C20orf27  |
| SZ_Networks | Coexp_Module_red   | 65987  | KCTD14    |
| SZ_Networks | Coexp_Module_red   | 138162 | C9orf116  |
| SZ_Networks | Coexp_Module_brown | 23170  | TTLL12    |
| SZ_Networks | Coexp_Module_brown | 54899  | PXK       |
| SZ_Networks | Coexp_Module_brown | 172    | AFG3L1P   |
| SZ_Networks | Coexp_Module_brown | 135295 | SRSF12    |
| SZ_Networks | Coexp_Module_brown | 123591 | C15orf27  |
| SZ_Networks | Coexp_Module_brown | 158471 | PRUNE2    |
| SZ_Networks | Coexp_Module_brown | 57524  | CASKIN1   |
| SZ_Networks | Coexp_Module_brown | 131096 | KCNH8     |
| SZ_Networks | Coexp_Module_brown | 222950 | NYAP1     |
| SZ_Networks | Coexp_Module_brown | 163049 | ZNF791    |

|             |                    |           |           |
|-------------|--------------------|-----------|-----------|
| SZ_Networks | Coexp_Module_brown | 114792    | KLHL32    |
| SZ_Networks | Coexp_Module_brown | 352954    | GATS      |
| SZ_Networks | Coexp_Module_brown | 56650     | CLDND1    |
| SZ_Networks | Coexp_Module_brown | 55293     | UEVLD     |
| SZ_Networks | Coexp_Module_brown | 1762      | DMWD      |
| SZ_Networks | Coexp_Module_brown | 220965    | FAM13C    |
| SZ_Networks | Coexp_Module_brown | 118442    | GPR62     |
| SZ_Networks | Coexp_Module_brown | 54933     | RHBDL2    |
| SZ_Networks | Coexp_Module_brown | 2894      | GRID1     |
| SZ_Networks | Coexp_Module_brown | 56924     | PAK6      |
| SZ_Networks | Coexp_Module_brown | 57018     | CCNL1     |
| SZ_Networks | Coexp_Module_brown | 201191    | SAMD14    |
| SZ_Networks | Coexp_Module_brown | 4670      | HNRNPM    |
| SZ_Networks | Coexp_Module_brown | 84445     | LZTS2     |
| SZ_Networks | Coexp_Module_brown | 1604      | CD55      |
| SZ_Networks | Coexp_Module_brown | 64399     | HHIP      |
| SZ_Networks | Coexp_Module_brown | 118611    | C10orf90  |
| SZ_Networks | Coexp_Module_brown | 158228    | FAM201A   |
| SZ_Networks | Coexp_Module_brown | 150356    | CHADL     |
| SZ_Networks | Coexp_Module_brown | 6461      | SHB       |
| SZ_Networks | Coexp_Module_brown | 387486    | LINC00320 |
| SZ_Networks | Coexp_Module_brown | 494470    | RNF165    |
| SZ_Networks | Coexp_Module_brown | 100129196 | MATN1-AS1 |
| SZ_Networks | Coexp_Module_brown | 80313     | LRRC27    |
| SZ_Networks | Coexp_Module_brown | 114794    | ELFN2     |
| SZ_Networks | Coexp_Module_brown | 54819     | ZCCHC10   |
| SZ_Networks | Coexp_Module_brown | 85449     | KIAA1755  |
| SZ_Networks | Coexp_Module_brown | 162998    | OR7D2     |
| SZ_Networks | Coexp_Module_brown | 283999    | TMEM235   |
| SZ_Networks | Coexp_Module_brown | 11116     | FGFR10P   |
| SZ_Networks | Coexp_Module_brown | 1603      | DAD1      |
| SZ_Networks | Coexp_Module_brown | 7705      | ZNF146    |
| SZ_Networks | Coexp_Module_brown | 23020     | SNRNP200  |
| SZ_Networks | Coexp_Module_brown | 2987      | GUK1      |
| SZ_Networks | Coexp_Module_brown | 2339      | FNTA      |
| SZ_Networks | Coexp_Module_brown | 3192      | HNRNPU    |
| SZ_Networks | Coexp_Module_brown | 10397     | NDRG1     |
| SZ_Networks | Coexp_Module_brown | 65108     | MARCKSL1  |
| SZ_Networks | Coexp_Module_brown | 2934      | GSN       |
| SZ_Networks | Coexp_Module_brown | 1808      | DPYSL2    |
| SZ_Networks | Coexp_Module_brown | 4144      | MAT2A     |
| SZ_Networks | Coexp_Module_brown | 5695      | PSMB7     |
| SZ_Networks | Coexp_Module_brown | 8682      | PEA15     |
| SZ_Networks | Coexp_Module_brown | 8826      | IQGAP1    |
| SZ_Networks | Coexp_Module_brown | 9802      | DAZAP2    |
| SZ_Networks | Coexp_Module_brown | 539       | ATP5O     |
| SZ_Networks | Coexp_Module_brown | 6319      | SCD       |
| SZ_Networks | Coexp_Module_brown | 5908      | RAP1B     |
| SZ_Networks | Coexp_Module_brown | 9798      | IST1      |
| SZ_Networks | Coexp_Module_brown | 1974      | EIF4A2    |
| SZ_Networks | Coexp_Module_brown | 1912      | PHC2      |
| SZ_Networks | Coexp_Module_brown | 1337      | COX6A1    |
| SZ_Networks | Coexp_Module_brown | 7913      | DEK       |
| SZ_Networks | Coexp_Module_brown | 5479      | PPIB      |
| SZ_Networks | Coexp_Module_brown | 928       | CD9       |
| SZ_Networks | Coexp_Module_brown | 23451     | SF3B1     |
| SZ_Networks | Coexp_Module_brown | 8396      | PIP4K2B   |
| SZ_Networks | Coexp_Module_brown | 1350      | COX7C     |

|             |                    |       |         |
|-------------|--------------------|-------|---------|
| SZ_Networks | Coexp_Module_brown | 1965  | EIF2S1  |
| SZ_Networks | Coexp_Module_brown | 9698  | PUM1    |
| SZ_Networks | Coexp_Module_brown | 25793 | FBXO7   |
| SZ_Networks | Coexp_Module_brown | 262   | AMD1    |
| SZ_Networks | Coexp_Module_brown | 5111  | PCNA    |
| SZ_Networks | Coexp_Module_brown | 5358  | PLS3    |
| SZ_Networks | Coexp_Module_brown | 6625  | SNRNP70 |
| SZ_Networks | Coexp_Module_brown | 10250 | SRRM1   |
| SZ_Networks | Coexp_Module_brown | 9167  | COX7A2L |
| SZ_Networks | Coexp_Module_brown | 5869  | RAB5B   |
| SZ_Networks | Coexp_Module_brown | 79602 | ADIPOR2 |
| SZ_Networks | Coexp_Module_brown | 2319  | FLOT2   |
| SZ_Networks | Coexp_Module_brown | 1315  | COPB1   |
| SZ_Networks | Coexp_Module_brown | 9898  | UBAP2L  |
| SZ_Networks | Coexp_Module_brown | 4077  | NBR1    |
| SZ_Networks | Coexp_Module_brown | 10181 | RBM5    |
| SZ_Networks | Coexp_Module_brown | 6449  | SGTA    |
| SZ_Networks | Coexp_Module_brown | 156   | ADRBK1  |
| SZ_Networks | Coexp_Module_brown | 8314  | BAP1    |
| SZ_Networks | Coexp_Module_brown | 6414  | SEPP1   |
| SZ_Networks | Coexp_Module_brown | 1340  | COX6B1  |
| SZ_Networks | Coexp_Module_brown | 6009  | RHEB    |
| SZ_Networks | Coexp_Module_brown | 6888  | TALDO1  |
| SZ_Networks | Coexp_Module_brown | 6723  | SRM     |
| SZ_Networks | Coexp_Module_brown | 9296  | ATP6V1F |
| SZ_Networks | Coexp_Module_brown | 6117  | RPA1    |
| SZ_Networks | Coexp_Module_brown | 3916  | LAMP1   |
| SZ_Networks | Coexp_Module_brown | 25932 | CLIC4   |
| SZ_Networks | Coexp_Module_brown | 27089 | UQCRCQ  |
| SZ_Networks | Coexp_Module_brown | 22938 | SNW1    |
| SZ_Networks | Coexp_Module_brown | 10212 | DDX39A  |
| SZ_Networks | Coexp_Module_brown | 9352  | TXNL1   |
| SZ_Networks | Coexp_Module_brown | 1347  | COX7A2  |
| SZ_Networks | Coexp_Module_brown | 10935 | PRDX3   |
| SZ_Networks | Coexp_Module_brown | 1967  | EIF2B1  |
| SZ_Networks | Coexp_Module_brown | 3371  | TNC     |
| SZ_Networks | Coexp_Module_brown | 2181  | ACSL3   |
| SZ_Networks | Coexp_Module_brown | 740   | MRPL49  |
| SZ_Networks | Coexp_Module_brown | 6446  | SGK1    |
| SZ_Networks | Coexp_Module_brown | 1345  | COX6C   |
| SZ_Networks | Coexp_Module_brown | 55884 | WSB2    |
| SZ_Networks | Coexp_Module_brown | 3073  | HEXA    |
| SZ_Networks | Coexp_Module_brown | 9918  | NCAPD2  |
| SZ_Networks | Coexp_Module_brown | 11342 | RNF13   |
| SZ_Networks | Coexp_Module_brown | 6035  | RNASE1  |
| SZ_Networks | Coexp_Module_brown | 1717  | DHCR7   |
| SZ_Networks | Coexp_Module_brown | 5564  | PRKAB1  |
| SZ_Networks | Coexp_Module_brown | 3988  | LIPA    |
| SZ_Networks | Coexp_Module_brown | 51035 | UBXN1   |
| SZ_Networks | Coexp_Module_brown | 84722 | PSRC1   |
| SZ_Networks | Coexp_Module_brown | 214   | ALCAM   |
| SZ_Networks | Coexp_Module_brown | 2180  | ACSL1   |
| SZ_Networks | Coexp_Module_brown | 4678  | NASP    |
| SZ_Networks | Coexp_Module_brown | 1389  | CREBL2  |
| SZ_Networks | Coexp_Module_brown | 4700  | NDUFA6  |
| SZ_Networks | Coexp_Module_brown | 439   | ASNA1   |
| SZ_Networks | Coexp_Module_brown | 4122  | MAN2A2  |
| SZ_Networks | Coexp_Module_brown | 9821  | RB1CC1  |

|             |                    |       |           |
|-------------|--------------------|-------|-----------|
| SZ_Networks | Coexp_Module_brown | 6422  | SFRP1     |
| SZ_Networks | Coexp_Module_brown | 26064 | RAI14     |
| SZ_Networks | Coexp_Module_brown | 9414  | TJP2      |
| SZ_Networks | Coexp_Module_brown | 10975 | UQCR11    |
| SZ_Networks | Coexp_Module_brown | 23568 | ARL2BP    |
| SZ_Networks | Coexp_Module_brown | 54623 | PAF1      |
| SZ_Networks | Coexp_Module_brown | 5184  | PEPD      |
| SZ_Networks | Coexp_Module_brown | 1349  | COX7B     |
| SZ_Networks | Coexp_Module_brown | 5977  | DPF2      |
| SZ_Networks | Coexp_Module_brown | 392   | ARHGAP1   |
| SZ_Networks | Coexp_Module_brown | 8021  | NUP214    |
| SZ_Networks | Coexp_Module_brown | 7716  | VEZF1     |
| SZ_Networks | Coexp_Module_brown | 5108  | PCM1      |
| SZ_Networks | Coexp_Module_brown | 8985  | PLOD3     |
| SZ_Networks | Coexp_Module_brown | 50999 | TMED5     |
| SZ_Networks | Coexp_Module_brown | 8897  | MTMR3     |
| SZ_Networks | Coexp_Module_brown | 4047  | LSS       |
| SZ_Networks | Coexp_Module_brown | 9129  | PRPF3     |
| SZ_Networks | Coexp_Module_brown | 1785  | DNM2      |
| SZ_Networks | Coexp_Module_brown | 522   | ATP5J     |
| SZ_Networks | Coexp_Module_brown | 11243 | PMF1      |
| SZ_Networks | Coexp_Module_brown | 5906  | RAP1A     |
| SZ_Networks | Coexp_Module_brown | 6695  | SPOCK1    |
| SZ_Networks | Coexp_Module_brown | 7398  | USP1      |
| SZ_Networks | Coexp_Module_brown | 9817  | KEAP1     |
| SZ_Networks | Coexp_Module_brown | 3321  | IGSF3     |
| SZ_Networks | Coexp_Module_brown | 7994  | KAT6A     |
| SZ_Networks | Coexp_Module_brown | 3300  | DNAJB2    |
| SZ_Networks | Coexp_Module_brown | 26097 | CHTOP     |
| SZ_Networks | Coexp_Module_brown | 8658  | TNKS      |
| SZ_Networks | Coexp_Module_brown | 7298  | TYMS      |
| SZ_Networks | Coexp_Module_brown | 9282  | MED14     |
| SZ_Networks | Coexp_Module_brown | 7844  | RNF103    |
| SZ_Networks | Coexp_Module_brown | 403   | ARL3      |
| SZ_Networks | Coexp_Module_brown | 7456  | WIPF1     |
| SZ_Networks | Coexp_Module_brown | 2958  | GTF2A2    |
| SZ_Networks | Coexp_Module_brown | 4864  | NPC1      |
| SZ_Networks | Coexp_Module_brown | 29890 | RBM15B    |
| SZ_Networks | Coexp_Module_brown | 1327  | COX4I1    |
| SZ_Networks | Coexp_Module_brown | 10140 | TOB1      |
| SZ_Networks | Coexp_Module_brown | 8349  | HIST2H2BE |
| SZ_Networks | Coexp_Module_brown | 25804 | LSM4      |
| SZ_Networks | Coexp_Module_brown | 6575  | SLC20A2   |
| SZ_Networks | Coexp_Module_brown | 25920 | NELFB     |
| SZ_Networks | Coexp_Module_brown | 836   | CASP3     |
| SZ_Networks | Coexp_Module_brown | 2200  | FBN1      |
| SZ_Networks | Coexp_Module_brown | 6433  | SFSWAP    |
| SZ_Networks | Coexp_Module_brown | 3628  | INPP1     |
| SZ_Networks | Coexp_Module_brown | 10617 | STAMBP    |
| SZ_Networks | Coexp_Module_brown | 2548  | GAA       |
| SZ_Networks | Coexp_Module_brown | 10614 | HEXIM1    |
| SZ_Networks | Coexp_Module_brown | 196   | AHR       |
| SZ_Networks | Coexp_Module_brown | 7307  | U2AF1     |
| SZ_Networks | Coexp_Module_brown | 9909  | DENND4B   |
| SZ_Networks | Coexp_Module_brown | 9267  | CYTH1     |
| SZ_Networks | Coexp_Module_brown | 5519  | PPP2R1B   |
| SZ_Networks | Coexp_Module_brown | 9053  | MAP7      |
| SZ_Networks | Coexp_Module_brown | 2956  | MSH6      |

|             |                    |       |          |
|-------------|--------------------|-------|----------|
| SZ_Networks | Coexp_Module_brown | 2729  | GCLC     |
| SZ_Networks | Coexp_Module_brown | 9551  | ATP5J2   |
| SZ_Networks | Coexp_Module_brown | 23303 | KIF13B   |
| SZ_Networks | Coexp_Module_brown | 51421 | AMOTL2   |
| SZ_Networks | Coexp_Module_brown | 56951 | C5orf15  |
| SZ_Networks | Coexp_Module_brown | 7390  | UROS     |
| SZ_Networks | Coexp_Module_brown | 5796  | PTPRK    |
| SZ_Networks | Coexp_Module_brown | 9656  | MDC1     |
| SZ_Networks | Coexp_Module_brown | 7869  | SEMA3B   |
| SZ_Networks | Coexp_Module_brown | 7058  | THBS2    |
| SZ_Networks | Coexp_Module_brown | 9425  | CDYL     |
| SZ_Networks | Coexp_Module_brown | 2235  | FECH     |
| SZ_Networks | Coexp_Module_brown | 9924  | PAN2     |
| SZ_Networks | Coexp_Module_brown | 4891  | SLC11A2  |
| SZ_Networks | Coexp_Module_brown | 3800  | KIF5C    |
| SZ_Networks | Coexp_Module_brown | 8520  | HAT1     |
| SZ_Networks | Coexp_Module_brown | 4130  | MAP1A    |
| SZ_Networks | Coexp_Module_brown | 10428 | CFDP1    |
| SZ_Networks | Coexp_Module_brown | 57020 | C16orf62 |
| SZ_Networks | Coexp_Module_brown | 9770  | RASSF2   |
| SZ_Networks | Coexp_Module_brown | 10058 | ABCB6    |
| SZ_Networks | Coexp_Module_brown | 4552  | MTRR     |
| SZ_Networks | Coexp_Module_brown | 1855  | DVL1     |
| SZ_Networks | Coexp_Module_brown | 22828 | SCAF8    |
| SZ_Networks | Coexp_Module_brown | 11334 | TUSC2    |
| SZ_Networks | Coexp_Module_brown | 22838 | RNF44    |
| SZ_Networks | Coexp_Module_brown | 9710  | KIAA0355 |
| SZ_Networks | Coexp_Module_brown | 6814  | STXBP3   |
| SZ_Networks | Coexp_Module_brown | 8440  | NCK2     |
| SZ_Networks | Coexp_Module_brown | 858   | CAV2     |
| SZ_Networks | Coexp_Module_brown | 3416  | IDE      |
| SZ_Networks | Coexp_Module_brown | 5529  | PPP2R5E  |
| SZ_Networks | Coexp_Module_brown | 9776  | ATG13    |
| SZ_Networks | Coexp_Module_brown | 4709  | NDUFB3   |
| SZ_Networks | Coexp_Module_brown | 51585 | PCF11    |
| SZ_Networks | Coexp_Module_brown | 1606  | DGKA     |
| SZ_Networks | Coexp_Module_brown | 7018  | TF       |
| SZ_Networks | Coexp_Module_brown | 5947  | RBP1     |
| SZ_Networks | Coexp_Module_brown | 5663  | PSEN1    |
| SZ_Networks | Coexp_Module_brown | 5372  | PMM1     |
| SZ_Networks | Coexp_Module_brown | 324   | APC      |
| SZ_Networks | Coexp_Module_brown | 9670  | IPO13    |
| SZ_Networks | Coexp_Module_brown | 11183 | MAP4K5   |
| SZ_Networks | Coexp_Module_brown | 9232  | PTTG1    |
| SZ_Networks | Coexp_Module_brown | 9638  | FEZ1     |
| SZ_Networks | Coexp_Module_brown | 6878  | TAF6     |
| SZ_Networks | Coexp_Module_brown | 4711  | NDUFB5   |
| SZ_Networks | Coexp_Module_brown | 2263  | FGFR2    |
| SZ_Networks | Coexp_Module_brown | 10150 | MBNL2    |
| SZ_Networks | Coexp_Module_brown | 9765  | ZFYVE16  |
| SZ_Networks | Coexp_Module_brown | 22909 | FAN1     |
| SZ_Networks | Coexp_Module_brown | 5311  | PKD2     |
| SZ_Networks | Coexp_Module_brown | 5142  | PDE4B    |
| SZ_Networks | Coexp_Module_brown | 6484  | ST3GAL4  |
| SZ_Networks | Coexp_Module_brown | 25801 | GCA      |
| SZ_Networks | Coexp_Module_brown | 10165 | SLC25A13 |
| SZ_Networks | Coexp_Module_brown | 9553  | MRPL33   |
| SZ_Networks | Coexp_Module_brown | 605   | BCL7A    |



|             |                    |       |           |
|-------------|--------------------|-------|-----------|
| SZ_Networks | Coexp_Module_brown | 1839  | HBEGF     |
| SZ_Networks | Coexp_Module_brown | 5998  | RGS3      |
| SZ_Networks | Coexp_Module_brown | 22864 | R3HDM2    |
| SZ_Networks | Coexp_Module_brown | 22924 | MAPRE3    |
| SZ_Networks | Coexp_Module_brown | 64854 | USP46     |
| SZ_Networks | Coexp_Module_brown | 23334 | SZT2      |
| SZ_Networks | Coexp_Module_brown | 9922  | IQSEC1    |
| SZ_Networks | Coexp_Module_brown | 9727  | RAB11FIP3 |
| SZ_Networks | Coexp_Module_brown | 1876  | E2F6      |
| SZ_Networks | Coexp_Module_brown | 2530  | FUT8      |
| SZ_Networks | Coexp_Module_brown | 7403  | KDM6A     |
| SZ_Networks | Coexp_Module_brown | 9319  | TRIP13    |
| SZ_Networks | Coexp_Module_brown | 4211  | MEIS1     |
| SZ_Networks | Coexp_Module_brown | 745   | MYRF      |
| SZ_Networks | Coexp_Module_brown | 1938  | EEF2      |
| SZ_Networks | Coexp_Module_brown | 55556 | ENOSF1    |
| SZ_Networks | Coexp_Module_brown | 22875 | ENPP4     |
| SZ_Networks | Coexp_Module_brown | 1371  | CPOX      |
| SZ_Networks | Coexp_Module_brown | 1318  | SLC31A2   |
| SZ_Networks | Coexp_Module_brown | 8310  | ACOX3     |
| SZ_Networks | Coexp_Module_brown | 1119  | CHKA      |
| SZ_Networks | Coexp_Module_brown | 9895  | TECPR2    |
| SZ_Networks | Coexp_Module_brown | 11322 | TMC6      |
| SZ_Networks | Coexp_Module_brown | 175   | AGA       |
| SZ_Networks | Coexp_Module_brown | 1307  | COL16A1   |
| SZ_Networks | Coexp_Module_brown | 4669  | NAGLU     |
| SZ_Networks | Coexp_Module_brown | 2976  | GTF3C2    |
| SZ_Networks | Coexp_Module_brown | 2869  | GRK5      |
| SZ_Networks | Coexp_Module_brown | 24139 | EML2      |
| SZ_Networks | Coexp_Module_brown | 23046 | KIF21B    |
| SZ_Networks | Coexp_Module_brown | 79095 | C9orf16   |
| SZ_Networks | Coexp_Module_brown | 5287  | PIK3C2B   |
| SZ_Networks | Coexp_Module_brown | 5144  | PDE4D     |
| SZ_Networks | Coexp_Module_brown | 8479  | HIRIP3    |
| SZ_Networks | Coexp_Module_brown | 51090 | PLLP      |
| SZ_Networks | Coexp_Module_brown | 22873 | DZIP1     |
| SZ_Networks | Coexp_Module_brown | 8493  | PPM1D     |
| SZ_Networks | Coexp_Module_brown | 22863 | ATG14     |
| SZ_Networks | Coexp_Module_brown | 3897  | L1CAM     |
| SZ_Networks | Coexp_Module_brown | 11007 | CCDC85B   |
| SZ_Networks | Coexp_Module_brown | 10495 | ENOX2     |
| SZ_Networks | Coexp_Module_brown | 9738  | CCP110    |
| SZ_Networks | Coexp_Module_brown | 9771  | RAPGEF5   |
| SZ_Networks | Coexp_Module_brown | 11135 | CDC42EP1  |
| SZ_Networks | Coexp_Module_brown | 10351 | ABCA8     |
| SZ_Networks | Coexp_Module_brown | 5653  | KLK6      |
| SZ_Networks | Coexp_Module_brown | 2123  | EVI2A     |
| SZ_Networks | Coexp_Module_brown | 4118  | MAL       |
| SZ_Networks | Coexp_Module_brown | 5422  | POLA1     |
| SZ_Networks | Coexp_Module_brown | 27030 | MLH3      |
| SZ_Networks | Coexp_Module_brown | 5576  | PRKAR2A   |
| SZ_Networks | Coexp_Module_brown | 1641  | DCX       |
| SZ_Networks | Coexp_Module_brown | 4832  | NME3      |
| SZ_Networks | Coexp_Module_brown | 3249  | HPN       |
| SZ_Networks | Coexp_Module_brown | 2705  | GJB1      |
| SZ_Networks | Coexp_Module_brown | 79090 | TRAPPC6A  |
| SZ_Networks | Coexp_Module_brown | 7039  | TGFA      |
| SZ_Networks | Coexp_Module_brown | 10124 | ARL4A     |

|             |                    |        |          |
|-------------|--------------------|--------|----------|
| SZ_Networks | Coexp_Module_brown | 9134   | CCNE2    |
| SZ_Networks | Coexp_Module_brown | 23542  | MAPK8IP2 |
| SZ_Networks | Coexp_Module_brown | 9751   | SNPH     |
| SZ_Networks | Coexp_Module_brown | 6712   | SPTBN2   |
| SZ_Networks | Coexp_Module_brown | 7746   | ZSCAN9   |
| SZ_Networks | Coexp_Module_brown | 50855  | PARD6A   |
| SZ_Networks | Coexp_Module_brown | 580    | BARD1    |
| SZ_Networks | Coexp_Module_brown | 2593   | GAMT     |
| SZ_Networks | Coexp_Module_brown | 8540   | AGPS     |
| SZ_Networks | Coexp_Module_brown | 3290   | HSD11B1  |
| SZ_Networks | Coexp_Module_brown | 10420  | TESK2    |
| SZ_Networks | Coexp_Module_brown | 1404   | HAPLN1   |
| SZ_Networks | Coexp_Module_brown | 8534   | CHST1    |
| SZ_Networks | Coexp_Module_brown | 51375  | SNX7     |
| SZ_Networks | Coexp_Module_brown | 3269   | HRH1     |
| SZ_Networks | Coexp_Module_brown | 10439  | OLFM1    |
| SZ_Networks | Coexp_Module_brown | 5638   | PRRG1    |
| SZ_Networks | Coexp_Module_brown | 1392   | CRH      |
| SZ_Networks | Coexp_Module_brown | 6457   | SH3GL3   |
| SZ_Networks | Coexp_Module_brown | 11069  | RAPGEF4  |
| SZ_Networks | Coexp_Module_brown | 4036   | LRP2     |
| SZ_Networks | Coexp_Module_brown | 79171  | RBM42    |
| SZ_Networks | Coexp_Module_brown | 25780  | RASGRP3  |
| SZ_Networks | Coexp_Module_brown | 9256   | BZRAP1   |
| SZ_Networks | Coexp_Module_brown | 9832   | JAKMIP2  |
| SZ_Networks | Coexp_Module_brown | 10224  | ZNF443   |
| SZ_Networks | Coexp_Module_brown | 5334   | PLCL1    |
| SZ_Networks | Coexp_Module_brown | 5365   | PLXNB3   |
| SZ_Networks | Coexp_Module_brown | 9625   | AATK     |
| SZ_Networks | Coexp_Module_brown | 7130   | TNFAIP6  |
| SZ_Networks | Coexp_Module_brown | 443    | ASPA     |
| SZ_Networks | Coexp_Module_brown | 7644   | ZNF91    |
| SZ_Networks | Coexp_Module_brown | 9705   | ST18     |
| SZ_Networks | Coexp_Module_brown | 9699   | RIMS2    |
| SZ_Networks | Coexp_Module_brown | 5298   | PI4KB    |
| SZ_Networks | Coexp_Module_brown | 116986 | AGAP2    |
| SZ_Networks | Coexp_Module_brown | 8633   | UNC5C    |
| SZ_Networks | Coexp_Module_brown | 3780   | KCNN1    |
| SZ_Networks | Coexp_Module_brown | 4145   | MATK     |
| SZ_Networks | Coexp_Module_brown | 53358  | SHC3     |
| SZ_Networks | Coexp_Module_brown | 7545   | ZIC1     |
| SZ_Networks | Coexp_Module_brown | 9745   | ZNF536   |
| SZ_Networks | Coexp_Module_brown | 23639  | LRRC6    |
| SZ_Networks | Coexp_Module_brown | 4051   | CYP4F3   |
| SZ_Networks | Coexp_Module_brown | 7432   | VIP      |
| SZ_Networks | Coexp_Module_brown | 10693  | CCT6B    |
| SZ_Networks | Coexp_Module_brown | 40     | ASIC2    |
| SZ_Networks | Coexp_Module_brown | 9142   | TMEM257  |
| SZ_Networks | Coexp_Module_brown | 23443  | SLC35A3  |
| SZ_Networks | Coexp_Module_brown | 4707   | NDUFB1   |
| SZ_Networks | Coexp_Module_brown | 10013  | HDAC6    |
| SZ_Networks | Coexp_Module_brown | 10633  | RASL10A  |
| SZ_Networks | Coexp_Module_brown | 28513  | CDH19    |
| SZ_Networks | Coexp_Module_brown | 4821   | NKX2-2   |
| SZ_Networks | Coexp_Module_brown | 2555   | GABRA2   |
| SZ_Networks | Coexp_Module_brown | 8402   | SLC25A11 |
| SZ_Networks | Coexp_Module_brown | 5027   | P2RX7    |
| SZ_Networks | Coexp_Module_brown | 4974   | OMG      |

|             |                    |       |         |
|-------------|--------------------|-------|---------|
| SZ_Networks | Coexp_Module_brown | 5296  | PIK3R2  |
| SZ_Networks | Coexp_Module_brown | 5046  | PCSK6   |
| SZ_Networks | Coexp_Module_brown | 5394  | EXOSC10 |
| SZ_Networks | Coexp_Module_brown | 8525  | DGKZ    |
| SZ_Networks | Coexp_Module_brown | 7439  | BEST1   |
| SZ_Networks | Coexp_Module_brown | 3094  | HINT1   |
| SZ_Networks | Coexp_Module_brown | 55643 | BTBD2   |
| SZ_Networks | Coexp_Module_brown | 272   | AMPD3   |
| SZ_Networks | Coexp_Module_brown | 863   | CBFA2T3 |
| SZ_Networks | Coexp_Module_brown | 81552 | VOPP1   |
| SZ_Networks | Coexp_Module_brown | 5662  | PSD     |
| SZ_Networks | Coexp_Module_brown | 83475 | DOHH    |
| SZ_Networks | Coexp_Module_brown | 3991  | LIPE    |
| SZ_Networks | Coexp_Module_brown | 238   | ALK     |
| SZ_Networks | Coexp_Module_brown | 7368  | UGT8    |
| SZ_Networks | Coexp_Module_brown | 3631  | INPP4A  |
| SZ_Networks | Coexp_Module_brown | 2317  | FLNB    |
| SZ_Networks | Coexp_Module_brown | 142   | PARP1   |
| SZ_Networks | Coexp_Module_brown | 2222  | FDFT1   |
| SZ_Networks | Coexp_Module_brown | 10109 | ARPC2   |
| SZ_Networks | Coexp_Module_brown | 10521 | DDX17   |
| SZ_Networks | Coexp_Module_brown | 10632 | ATP5L   |
| SZ_Networks | Coexp_Module_brown | 23385 | NCSTN   |
| SZ_Networks | Coexp_Module_brown | 517   | ATP5G2  |
| SZ_Networks | Coexp_Module_brown | 4179  | CD46    |
| SZ_Networks | Coexp_Module_brown | 1107  | CHD3    |
| SZ_Networks | Coexp_Module_brown | 5747  | PTK2    |
| SZ_Networks | Coexp_Module_brown | 5127  | CDK16   |
| SZ_Networks | Coexp_Module_brown | 26003 | GORASP2 |
| SZ_Networks | Coexp_Module_brown | 1267  | CNP     |
| SZ_Networks | Coexp_Module_brown | 1397  | CRIP2   |
| SZ_Networks | Coexp_Module_brown | 3189  | HNRNPH3 |
| SZ_Networks | Coexp_Module_brown | 10006 | ABI1    |
| SZ_Networks | Coexp_Module_brown | 10938 | EHD1    |
| SZ_Networks | Coexp_Module_brown | 10539 | GLRX3   |
| SZ_Networks | Coexp_Module_brown | 5981  | RFC1    |
| SZ_Networks | Coexp_Module_brown | 4162  | MCAM    |
| SZ_Networks | Coexp_Module_brown | 7866  | IFRD2   |
| SZ_Networks | Coexp_Module_brown | 1490  | CTGF    |
| SZ_Networks | Coexp_Module_brown | 7846  | TUBA1A  |
| SZ_Networks | Coexp_Module_brown | 5860  | QDPR    |
| SZ_Networks | Coexp_Module_brown | 25915 | NDUFAF3 |
| SZ_Networks | Coexp_Module_brown | 79143 | MBOAT7  |
| SZ_Networks | Coexp_Module_brown | 873   | CBR1    |
| SZ_Networks | Coexp_Module_brown | 7936  | NELFE   |
| SZ_Networks | Coexp_Module_brown | 22870 | PPP6R1  |
| SZ_Networks | Coexp_Module_brown | 56339 | METTTL3 |
| SZ_Networks | Coexp_Module_brown | 2186  | BPTF    |
| SZ_Networks | Coexp_Module_brown | 760   | CA2     |
| SZ_Networks | Coexp_Module_brown | 563   | AZGP1   |
| SZ_Networks | Coexp_Module_brown | 5822  | PWP2    |
| SZ_Networks | Coexp_Module_brown | 23309 | SIN3B   |
| SZ_Networks | Coexp_Module_brown | 57060 | PCBP4   |
| SZ_Networks | Coexp_Module_brown | 9412  | MED21   |
| SZ_Networks | Coexp_Module_brown | 7508  | XPC     |
| SZ_Networks | Coexp_Module_brown | 10057 | ABCC5   |
| SZ_Networks | Coexp_Module_brown | 10522 | DEAF1   |
| SZ_Networks | Coexp_Module_brown | 8704  | B4GALT2 |

|             |                    |        |           |
|-------------|--------------------|--------|-----------|
| SZ_Networks | Coexp_Module_brown | 9044   | BTAF1     |
| SZ_Networks | Coexp_Module_brown | 9181   | ARHGEF2   |
| SZ_Networks | Coexp_Module_brown | 10553  | HTATIP2   |
| SZ_Networks | Coexp_Module_brown | 333    | APLP1     |
| SZ_Networks | Coexp_Module_brown | 2823   | GPM6A     |
| SZ_Networks | Coexp_Module_brown | 25936  | NSL1      |
| SZ_Networks | Coexp_Module_brown | 1798   | DPAGT1    |
| SZ_Networks | Coexp_Module_brown | 11236  | RNF139    |
| SZ_Networks | Coexp_Module_brown | 6873   | TAF2      |
| SZ_Networks | Coexp_Module_brown | 8612   | PPAP2C    |
| SZ_Networks | Coexp_Module_brown | 11145  | PLA2G16   |
| SZ_Networks | Coexp_Module_brown | 1501   | CTNND2    |
| SZ_Networks | Coexp_Module_brown | 2861   | GPR37     |
| SZ_Networks | Coexp_Module_brown | 5523   | PPP2R3A   |
| SZ_Networks | Coexp_Module_brown | 6002   | RGS12     |
| SZ_Networks | Coexp_Module_brown | 5584   | PRKCI     |
| SZ_Networks | Coexp_Module_brown | 868    | CBLB      |
| SZ_Networks | Coexp_Module_brown | 10026  | PIGK      |
| SZ_Networks | Coexp_Module_brown | 7541   | ZBTB14    |
| SZ_Networks | Coexp_Module_brown | 770    | CA11      |
| SZ_Networks | Coexp_Module_brown | 4613   | MYCN      |
| SZ_Networks | Coexp_Module_brown | 1632   | ECI1      |
| SZ_Networks | Coexp_Module_brown | 1628   | DBP       |
| SZ_Networks | Coexp_Module_brown | 8605   | PLA2G4C   |
| SZ_Networks | Coexp_Module_brown | 6663   | SOX10     |
| SZ_Networks | Coexp_Module_brown | 6623   | SNCG      |
| SZ_Networks | Coexp_Module_brown | 23127  | COLGALT2  |
| SZ_Networks | Coexp_Module_brown | 22827  | PUF60     |
| SZ_Networks | Coexp_Module_brown | 729991 | MEF2BNB   |
| SZ_Networks | Coexp_Module_brown | 5588   | PRKCQ     |
| SZ_Networks | Coexp_Module_brown | 23008  | KLHDC10   |
| SZ_Networks | Coexp_Module_brown | 7108   | TM7SF2    |
| SZ_Networks | Coexp_Module_brown | 5376   | PMP22     |
| SZ_Networks | Coexp_Module_brown | 9717   | SEC14L5   |
| SZ_Networks | Coexp_Module_brown | 2280   | FKBP1A    |
| SZ_Networks | Coexp_Module_brown | 5354   | PLP1      |
| SZ_Networks | Coexp_Module_brown | 274    | BIN1      |
| SZ_Networks | Coexp_Module_brown | 9228   | DLGAP2    |
| SZ_Networks | Coexp_Module_brown | 9536   | PTGES     |
| SZ_Networks | Coexp_Module_brown | 6619   | SNAPC3    |
| SZ_Networks | Coexp_Module_brown | 26118  | WSB1      |
| SZ_Networks | Coexp_Module_brown | 8724   | SNX3      |
| SZ_Networks | Coexp_Module_brown | 5414   | SEPT4     |
| SZ_Networks | Coexp_Module_brown | 63941  | NECAB3    |
| SZ_Networks | Coexp_Module_brown | 26056  | RAB11FIP5 |
| SZ_Networks | Coexp_Module_brown | 825    | CAPN3     |
| SZ_Networks | Coexp_Module_brown | 11343  | MGLL      |
| SZ_Networks | Coexp_Module_brown | 7461   | CLIP2     |
| SZ_Networks | Coexp_Module_brown | 8646   | CHRD      |
| SZ_Networks | Coexp_Module_brown | 6579   | SLCO1A2   |
| SZ_Networks | Coexp_Module_brown | 3306   | HSPA2     |
| SZ_Networks | Coexp_Module_brown | 775    | CACNA1C   |
| SZ_Networks | Coexp_Module_brown | 64963  | MRPS11    |
| SZ_Networks | Coexp_Module_brown | 1781   | DYNC1I2   |
| SZ_Networks | Coexp_Module_brown | 3516   | RBPJ      |
| SZ_Networks | Coexp_Module_brown | 3021   | H3F3B     |
| SZ_Networks | Coexp_Module_brown | 5411   | PNN       |
| SZ_Networks | Coexp_Module_brown | 23350  | U2SURP    |

|             |                    |        |         |
|-------------|--------------------|--------|---------|
| SZ_Networks | Coexp_Module_brown | 26133  | TRPC4AP |
| SZ_Networks | Coexp_Module_brown | 23203  | PMPCA   |
| SZ_Networks | Coexp_Module_brown | 2907   | GRINA   |
| SZ_Networks | Coexp_Module_brown | 57509  | MTUS1   |
| SZ_Networks | Coexp_Module_brown | 857    | CAV1    |
| SZ_Networks | Coexp_Module_brown | 90861  | HN1L    |
| SZ_Networks | Coexp_Module_brown | 23187  | PHLDB1  |
| SZ_Networks | Coexp_Module_brown | 25777  | SUN2    |
| SZ_Networks | Coexp_Module_brown | 31     | ACACA   |
| SZ_Networks | Coexp_Module_brown | 25963  | TMEM87A |
| SZ_Networks | Coexp_Module_brown | 23198  | PSME4   |
| SZ_Networks | Coexp_Module_brown | 3423   | IDS     |
| SZ_Networks | Coexp_Module_brown | 23165  | NUP205  |
| SZ_Networks | Coexp_Module_brown | 92140  | MTDH    |
| SZ_Networks | Coexp_Module_brown | 667    | DST     |
| SZ_Networks | Coexp_Module_brown | 8888   | MCM3AP  |
| SZ_Networks | Coexp_Module_brown | 23048  | FNBP1   |
| SZ_Networks | Coexp_Module_brown | 91782  | CHMP7   |
| SZ_Networks | Coexp_Module_brown | 22998  | LIMCH1  |
| SZ_Networks | Coexp_Module_brown | 4642   | MYO1D   |
| SZ_Networks | Coexp_Module_brown | 10972  | TMED10  |
| SZ_Networks | Coexp_Module_brown | 5962   | RDX     |
| SZ_Networks | Coexp_Module_brown | 399665 | FAM102A |
| SZ_Networks | Coexp_Module_brown | 200734 | SPRED2  |
| SZ_Networks | Coexp_Module_brown | 171546 | SPTSSA  |
| SZ_Networks | Coexp_Module_brown | 8301   | PICALM  |
| SZ_Networks | Coexp_Module_brown | 23396  | PIP5K1C |
| SZ_Networks | Coexp_Module_brown | 7324   | UBE2E1  |
| SZ_Networks | Coexp_Module_brown | 5151   | PDE8A   |
| SZ_Networks | Coexp_Module_brown | 23348  | DOCK9   |
| SZ_Networks | Coexp_Module_brown | 9557   | CHD1L   |
| SZ_Networks | Coexp_Module_brown | 55023  | PHIP    |
| SZ_Networks | Coexp_Module_brown | 285527 | FRYL    |
| SZ_Networks | Coexp_Module_brown | 23258  | DENND5A |
| SZ_Networks | Coexp_Module_brown | 23052  | ENDOD1  |
| SZ_Networks | Coexp_Module_brown | 831    | CAST    |
| SZ_Networks | Coexp_Module_brown | 10042  | HMGXB4  |
| SZ_Networks | Coexp_Module_brown | 201562 | PTPLB   |
| SZ_Networks | Coexp_Module_brown | 7551   | ZNF3    |
| SZ_Networks | Coexp_Module_brown | 5096   | PCCB    |
| SZ_Networks | Coexp_Module_brown | 151011 | SEPT10  |
| SZ_Networks | Coexp_Module_brown | 57553  | MICAL3  |
| SZ_Networks | Coexp_Module_brown | 23239  | PHLPP1  |
| SZ_Networks | Coexp_Module_brown | 23336  | SYNM    |
| SZ_Networks | Coexp_Module_brown | 2760   | GM2A    |
| SZ_Networks | Coexp_Module_brown | 57591  | MKL1    |
| SZ_Networks | Coexp_Module_brown | 23332  | CLASP1  |
| SZ_Networks | Coexp_Module_brown | 23041  | MON2    |
| SZ_Networks | Coexp_Module_brown | 20     | ABCA2   |
| SZ_Networks | Coexp_Module_brown | 23241  | PACS2   |
| SZ_Networks | Coexp_Module_brown | 11113  | CIT     |
| SZ_Networks | Coexp_Module_brown | 256987 | SERINC5 |
| SZ_Networks | Coexp_Module_brown | 83700  | JAM3    |
| SZ_Networks | Coexp_Module_brown | 26030  | PLEKHG3 |
| SZ_Networks | Coexp_Module_brown | 22976  | PAXIP1  |
| SZ_Networks | Coexp_Module_brown | 8871   | SYNJ2   |
| SZ_Networks | Coexp_Module_brown | 8495   | PPFIBP2 |
| SZ_Networks | Coexp_Module_brown | 84909  | C9orf3  |

|             |                    |        |          |
|-------------|--------------------|--------|----------|
| SZ_Networks | Coexp_Module_brown | 124222 | PAQR4    |
| SZ_Networks | Coexp_Module_brown | 26009  | ZZZ3     |
| SZ_Networks | Coexp_Module_brown | 23097  | CDK19    |
| SZ_Networks | Coexp_Module_brown | 23283  | CSTF2T   |
| SZ_Networks | Coexp_Module_brown | 137886 | UBXN2B   |
| SZ_Networks | Coexp_Module_brown | 23452  | ANGPTL2  |
| SZ_Networks | Coexp_Module_brown | 5362   | PLXNA2   |
| SZ_Networks | Coexp_Module_brown | 23387  | SIK3     |
| SZ_Networks | Coexp_Module_brown | 23150  | FRMD4B   |
| SZ_Networks | Coexp_Module_brown | 123803 | NTAN1    |
| SZ_Networks | Coexp_Module_brown | 23503  | ZFYVE26  |
| SZ_Networks | Coexp_Module_brown | 23373  | CRTC1    |
| SZ_Networks | Coexp_Module_brown | 815    | CAMK2A   |
| SZ_Networks | Coexp_Module_brown | 1287   | COL4A5   |
| SZ_Networks | Coexp_Module_brown | 4752   | NEK3     |
| SZ_Networks | Coexp_Module_brown | 653784 | MZT2A    |
| SZ_Networks | Coexp_Module_brown | 23113  | CUL9     |
| SZ_Networks | Coexp_Module_brown | 30850  | CDR2L    |
| SZ_Networks | Coexp_Module_brown | 22941  | SHANK2   |
| SZ_Networks | Coexp_Module_brown | 57150  | SMIM8    |
| SZ_Networks | Coexp_Module_brown | 57212  | TP73-AS1 |
| SZ_Networks | Coexp_Module_brown | 1028   | CDKN1C   |
| SZ_Networks | Coexp_Module_brown | 6642   | SNX1     |
| SZ_Networks | Coexp_Module_brown | 11155  | LDB3     |
| SZ_Networks | Coexp_Module_brown | 1124   | CHN2     |
| SZ_Networks | Coexp_Module_brown | 23114  | NFASC    |
| SZ_Networks | Coexp_Module_brown | 23398  | PPWD1    |
| SZ_Networks | Coexp_Module_brown | 10147  | SUGP2    |
| SZ_Networks | Coexp_Module_brown | 402055 | SRRD     |
| SZ_Networks | Coexp_Module_brown | 151230 | KLHL23   |
| SZ_Networks | Coexp_Module_brown | 116984 | ARAP2    |
| SZ_Networks | Coexp_Module_brown | 1298   | COL9A2   |
| SZ_Networks | Coexp_Module_brown | 23148  | NACAD    |
| SZ_Networks | Coexp_Module_brown | 10645  | CAMKK2   |
| SZ_Networks | Coexp_Module_brown | 10215  | OLIG2    |
| SZ_Networks | Coexp_Module_brown | 440073 | IQSEC3   |
| SZ_Networks | Coexp_Module_brown | 79789  | CLMN     |
| SZ_Networks | Coexp_Module_brown | 260294 | NSUN5P2  |
| SZ_Networks | Coexp_Module_brown | 79912  | PYROXD1  |
| SZ_Networks | Coexp_Module_brown | 8549   | LGR5     |
| SZ_Networks | Coexp_Module_brown | 29893  | PSMC3IP  |
| SZ_Networks | Coexp_Module_brown | 26038  | CHD5     |
| SZ_Networks | Coexp_Module_brown | 57188  | ADAMTSL3 |
| SZ_Networks | Coexp_Module_brown | 23359  | FAM189A1 |
| SZ_Networks | Coexp_Module_brown | 81550  | TDRD3    |
| SZ_Networks | Coexp_Module_brown | 5789   | PTPRD    |
| SZ_Networks | Coexp_Module_brown | 8880   | FUBP1    |
| SZ_Networks | Coexp_Module_brown | 25924  | MYRIP    |
| SZ_Networks | Coexp_Module_brown | 8632   | DNAH17   |
| SZ_Networks | Coexp_Module_brown | 30     | ACAA1    |
| SZ_Networks | Coexp_Module_brown | 65110  | UPF3A    |
| SZ_Networks | Coexp_Module_brown | 9782   | MATR3    |
| SZ_Networks | Coexp_Module_brown | 6293   | VPS52    |
| SZ_Networks | Coexp_Module_brown | 2897   | GRIK1    |
| SZ_Networks | Coexp_Module_brown | 4340   | MOG      |
| SZ_Networks | Coexp_Module_brown | 7586   | ZKSCAN1  |
| SZ_Networks | Coexp_Module_brown | 226    | ALDOA    |
| SZ_Networks | Coexp_Module_brown | 57798  | GATAD1   |

|             |                    |        |          |
|-------------|--------------------|--------|----------|
| SZ_Networks | Coexp_Module_brown | 23007  | PLCH1    |
| SZ_Networks | Coexp_Module_brown | 27352  | SGSM3    |
| SZ_Networks | Coexp_Module_brown | 4650   | MYO9B    |
| SZ_Networks | Coexp_Module_brown | 23109  | DDN      |
| SZ_Networks | Coexp_Module_brown | 5129   | CDK18    |
| SZ_Networks | Coexp_Module_brown | 23096  | IQSEC2   |
| SZ_Networks | Coexp_Module_brown | 9725   | TMEM63A  |
| SZ_Networks | Coexp_Module_brown | 9380   | GRHPR    |
| SZ_Networks | Coexp_Module_brown | 102    | ADAM10   |
| SZ_Networks | Coexp_Module_brown | 80028  | FBXL18   |
| SZ_Networks | Coexp_Module_brown | 2971   | GTF3A    |
| SZ_Networks | Coexp_Module_brown | 4808   | NHLH2    |
| SZ_Networks | Coexp_Module_brown | 6543   | SLC8A2   |
| SZ_Networks | Coexp_Module_brown | 643314 | KIAA0754 |
| SZ_Networks | Coexp_Module_brown | 2346   | FOLH1    |
| SZ_Networks | Coexp_Module_brown | 2558   | GABRA5   |
| SZ_Networks | Coexp_Module_brown | 4946   | OAZ1     |
| SZ_Networks | Coexp_Module_brown | 4099   | MAG      |
| SZ_Networks | Coexp_Module_brown | 85452  | KIAA1751 |
| SZ_Networks | Coexp_Module_brown | 23313  | KIAA0930 |
| SZ_Networks | Coexp_Module_brown | 166    | AES      |
| SZ_Networks | Coexp_Module_brown | 10015  | PDCD6IP  |
| SZ_Networks | Coexp_Module_brown | 55748  | CNDP2    |
| SZ_Networks | Coexp_Module_brown | 4697   | NDUFA4   |
| SZ_Networks | Coexp_Module_brown | 64397  | ZNF106   |
| SZ_Networks | Coexp_Module_brown | 51506  | UFC1     |
| SZ_Networks | Coexp_Module_brown | 79109  | MAPKAP1  |
| SZ_Networks | Coexp_Module_brown | 51125  | GOLGA7   |
| SZ_Networks | Coexp_Module_brown | 79811  | SLTM     |
| SZ_Networks | Coexp_Module_brown | 51466  | EVL      |
| SZ_Networks | Coexp_Module_brown | 5859   | QARS     |
| SZ_Networks | Coexp_Module_brown | 55819  | RNF130   |
| SZ_Networks | Coexp_Module_brown | 51144  | HSD17B12 |
| SZ_Networks | Coexp_Module_brown | 60313  | GPBP1L1  |
| SZ_Networks | Coexp_Module_brown | 51133  | KCTD3    |
| SZ_Networks | Coexp_Module_brown | 23621  | BACE1    |
| SZ_Networks | Coexp_Module_brown | 27018  | NGFRAP1  |
| SZ_Networks | Coexp_Module_brown | 29115  | SAP30BP  |
| SZ_Networks | Coexp_Module_brown | 2287   | FKBP3    |
| SZ_Networks | Coexp_Module_brown | 8566   | PDXK     |
| SZ_Networks | Coexp_Module_brown | 51660  | MPC1     |
| SZ_Networks | Coexp_Module_brown | 51024  | FIS1     |
| SZ_Networks | Coexp_Module_brown | 4201   | MEA1     |
| SZ_Networks | Coexp_Module_brown | 25980  | AAR2     |
| SZ_Networks | Coexp_Module_brown | 55852  | TEX2     |
| SZ_Networks | Coexp_Module_brown | 56882  | CDC42SE1 |
| SZ_Networks | Coexp_Module_brown | 4702   | NDUFA8   |
| SZ_Networks | Coexp_Module_brown | 29796  | UQCR10   |
| SZ_Networks | Coexp_Module_brown | 4708   | NDUFB2   |
| SZ_Networks | Coexp_Module_brown | 29880  | ALG5     |
| SZ_Networks | Coexp_Module_brown | 80148  | PQLC1    |
| SZ_Networks | Coexp_Module_brown | 746    | TMEM258  |
| SZ_Networks | Coexp_Module_brown | 4710   | NDUFB4   |
| SZ_Networks | Coexp_Module_brown | 9950   | GOLGA5   |
| SZ_Networks | Coexp_Module_brown | 51128  | SAR1B    |
| SZ_Networks | Coexp_Module_brown | 53371  | NUP54    |
| SZ_Networks | Coexp_Module_brown | 58486  | ZBED5    |
| SZ_Networks | Coexp_Module_brown | 64786  | TBC1D15  |

|             |                    |       |          |
|-------------|--------------------|-------|----------|
| SZ_Networks | Coexp_Module_brown | 51642 | MRPL48   |
| SZ_Networks | Coexp_Module_brown | 60492 | CCDC90B  |
| SZ_Networks | Coexp_Module_brown | 55450 | CAMK2N1  |
| SZ_Networks | Coexp_Module_brown | 51809 | GALNT7   |
| SZ_Networks | Coexp_Module_brown | 26520 | TIMM9    |
| SZ_Networks | Coexp_Module_brown | 9209  | LRRFIP2  |
| SZ_Networks | Coexp_Module_brown | 64766 | S100BPB  |
| SZ_Networks | Coexp_Module_brown | 10179 | RBM7     |
| SZ_Networks | Coexp_Module_brown | 29937 | NENF     |
| SZ_Networks | Coexp_Module_brown | 54820 | NDE1     |
| SZ_Networks | Coexp_Module_brown | 51542 | VPS54    |
| SZ_Networks | Coexp_Module_brown | 26585 | GREM1    |
| SZ_Networks | Coexp_Module_brown | 51067 | YARS2    |
| SZ_Networks | Coexp_Module_brown | 8462  | KLF11    |
| SZ_Networks | Coexp_Module_brown | 79726 | WDR59    |
| SZ_Networks | Coexp_Module_brown | 94104 | PAXBP1   |
| SZ_Networks | Coexp_Module_brown | 55032 | SLC35A5  |
| SZ_Networks | Coexp_Module_brown | 55665 | URGCP    |
| SZ_Networks | Coexp_Module_brown | 23400 | ATP13A2  |
| SZ_Networks | Coexp_Module_brown | 55313 | CPPED1   |
| SZ_Networks | Coexp_Module_brown | 64784 | CRTC3    |
| SZ_Networks | Coexp_Module_brown | 55323 | LARP6    |
| SZ_Networks | Coexp_Module_brown | 54872 | PIGG     |
| SZ_Networks | Coexp_Module_brown | 55144 | LRRC8D   |
| SZ_Networks | Coexp_Module_brown | 23555 | TSPAN15  |
| SZ_Networks | Coexp_Module_brown | 51074 | APIP     |
| SZ_Networks | Coexp_Module_brown | 51110 | LACTB2   |
| SZ_Networks | Coexp_Module_brown | 64856 | VWA1     |
| SZ_Networks | Coexp_Module_brown | 51444 | RNF138   |
| SZ_Networks | Coexp_Module_brown | 79707 | NOL9     |
| SZ_Networks | Coexp_Module_brown | 57122 | NUP107   |
| SZ_Networks | Coexp_Module_brown | 57763 | ANKRA2   |
| SZ_Networks | Coexp_Module_brown | 54494 | C11orf71 |
| SZ_Networks | Coexp_Module_brown | 55227 | LRRC1    |
| SZ_Networks | Coexp_Module_brown | 51121 | RPL26L1  |
| SZ_Networks | Coexp_Module_brown | 54972 | TMEM132A |
| SZ_Networks | Coexp_Module_brown | 56940 | DUSP22   |
| SZ_Networks | Coexp_Module_brown | 64798 | DEPTOR   |
| SZ_Networks | Coexp_Module_brown | 51673 | TPPP3    |
| SZ_Networks | Coexp_Module_brown | 64837 | KLC2     |
| SZ_Networks | Coexp_Module_brown | 4771  | NF2      |
| SZ_Networks | Coexp_Module_brown | 54925 | ZSCAN32  |
| SZ_Networks | Coexp_Module_brown | 80227 | PAAF1    |
| SZ_Networks | Coexp_Module_brown | 51076 | CUTC     |
| SZ_Networks | Coexp_Module_brown | 55084 | SOBP     |
| SZ_Networks | Coexp_Module_brown | 29844 | TFPT     |
| SZ_Networks | Coexp_Module_brown | 79668 | PARP8    |
| SZ_Networks | Coexp_Module_brown | 79710 | MORC4    |
| SZ_Networks | Coexp_Module_brown | 55258 | THNSL2   |
| SZ_Networks | Coexp_Module_brown | 8270  | LAGE3    |
| SZ_Networks | Coexp_Module_brown | 79731 | NARS2    |
| SZ_Networks | Coexp_Module_brown | 28232 | SLCO3A1  |
| SZ_Networks | Coexp_Module_brown | 55619 | DOCK10   |
| SZ_Networks | Coexp_Module_brown | 11201 | POLI     |
| SZ_Networks | Coexp_Module_brown | 56475 | RPRM     |
| SZ_Networks | Coexp_Module_brown | 79899 | PRR5L    |
| SZ_Networks | Coexp_Module_brown | 79152 | FA2H     |
| SZ_Networks | Coexp_Module_brown | 56913 | C1GALT1  |



|             |                    |        |           |
|-------------|--------------------|--------|-----------|
| SZ_Networks | Coexp_Module_brown | 54826  | GIN1      |
| SZ_Networks | Coexp_Module_brown | 56980  | PRDM10    |
| SZ_Networks | Coexp_Module_brown | 25837  | RAB26     |
| SZ_Networks | Coexp_Module_brown | 79686  | LINC00341 |
| SZ_Networks | Coexp_Module_brown | 55614  | KIF16B    |
| SZ_Networks | Coexp_Module_brown | 4815   | NINJ2     |
| SZ_Networks | Coexp_Module_brown | 79970  | ZNF767    |
| SZ_Networks | Coexp_Module_brown | 254394 | MCM9      |
| SZ_Networks | Coexp_Module_brown | 9499   | MYOT      |
| SZ_Networks | Coexp_Module_brown | 64130  | LIN7B     |
| SZ_Networks | Coexp_Module_brown | 28957  | MRPS28    |
| SZ_Networks | Coexp_Module_brown | 79800  | CARF      |
| SZ_Networks | Coexp_Module_brown | 26468  | LHX6      |
| SZ_Networks | Coexp_Module_brown | 55096  | EBLN2     |
| SZ_Networks | Coexp_Module_brown | 11226  | GALNT6    |
| SZ_Networks | Coexp_Module_brown | 79905  | TMC7      |
| SZ_Networks | Coexp_Module_brown | 22802  | CLCA4     |
| SZ_Networks | Coexp_Module_brown | 80235  | PIGZ      |
| SZ_Networks | Coexp_Module_brown | 79722  | ANKRD55   |
| SZ_Networks | Coexp_Module_brown | 60484  | HAPLN2    |
| SZ_Networks | Coexp_Module_brown | 51700  | CYB5R2    |
| SZ_Networks | Coexp_Module_brown | 54537  | FAM35A    |
| SZ_Networks | Coexp_Module_brown | 57084  | SLC17A6   |
| SZ_Networks | Coexp_Module_brown | 22933  | SIRT2     |
| SZ_Networks | Coexp_Module_brown | 55205  | ZNF532    |
| SZ_Networks | Coexp_Module_brown | 55179  | FAIM      |
| SZ_Networks | Coexp_Module_brown | 105    | ADARB2    |
| SZ_Networks | Coexp_Module_brown | 11141  | IL1RAPL1  |
| SZ_Networks | Coexp_Module_brown | 10826  | FAXDC2    |
| SZ_Networks | Coexp_Module_brown | 57596  | BEGAIN    |
| SZ_Networks | Coexp_Module_brown | 56936  | CCDC177   |
| SZ_Networks | Coexp_Module_brown | 26355  | FAM162A   |
| SZ_Networks | Coexp_Module_brown | 81873  | ARPC5L    |
| SZ_Networks | Coexp_Module_brown | 81609  | SNX27     |
| SZ_Networks | Coexp_Module_brown | 26012  | NSMF      |
| SZ_Networks | Coexp_Module_brown | 51742  | ARID4B    |
| SZ_Networks | Coexp_Module_brown | 81563  | C1orf21   |
| SZ_Networks | Coexp_Module_brown | 6138   | RPL15     |
| SZ_Networks | Coexp_Module_brown | 64422  | ATG3      |
| SZ_Networks | Coexp_Module_brown | 27335  | EIF3K     |
| SZ_Networks | Coexp_Module_brown | 8675   | STX16     |
| SZ_Networks | Coexp_Module_brown | 79365  | BHLHE41   |
| SZ_Networks | Coexp_Module_brown | 83638  | C11orf68  |
| SZ_Networks | Coexp_Module_brown | 79003  | MIS12     |
| SZ_Networks | Coexp_Module_brown | 11221  | DUSP10    |
| SZ_Networks | Coexp_Module_brown | 79929  | MAP6D1    |
| SZ_Networks | Coexp_Module_brown | 54434  | SSH1      |
| SZ_Networks | Coexp_Module_brown | 26119  | LDLRAP1   |
| SZ_Networks | Coexp_Module_brown | 9367   | RAB9A     |
| SZ_Networks | Coexp_Module_brown | 54934  | KANSL2    |
| SZ_Networks | Coexp_Module_brown | 220972 | MARCH8    |
| SZ_Networks | Coexp_Module_brown | 9314   | KLF4      |
| SZ_Networks | Coexp_Module_brown | 23232  | TBC1D12   |
| SZ_Networks | Coexp_Module_brown | 25861  | DFNB31    |
| SZ_Networks | Coexp_Module_brown | 158747 | MOSPD2    |
| SZ_Networks | Coexp_Module_brown | 10443  | N4BP2L2   |
| SZ_Networks | Coexp_Module_brown | 84900  | RNFT2     |
| SZ_Networks | Coexp_Module_brown | 51218  | GLRX5     |

|             |                    |        |            |
|-------------|--------------------|--------|------------|
| SZ_Networks | Coexp_Module_brown | 5165   | PKD3       |
| SZ_Networks | Coexp_Module_brown | 55357  | TBC1D2     |
| SZ_Networks | Coexp_Module_brown | 29956  | CERS2      |
| SZ_Networks | Coexp_Module_brown | 79007  | DBNDD1     |
| SZ_Networks | Coexp_Module_brown | 55454  | CSGALNACT2 |
| SZ_Networks | Coexp_Module_brown | 23677  | SH3BP4     |
| SZ_Networks | Coexp_Module_brown | 23585  | TMEM50A    |
| SZ_Networks | Coexp_Module_brown | 23603  | CORO1C     |
| SZ_Networks | Coexp_Module_brown | 27131  | SNX5       |
| SZ_Networks | Coexp_Module_brown | 51114  | ZDHC9      |
| SZ_Networks | Coexp_Module_brown | 79892  | MCMBP      |
| SZ_Networks | Coexp_Module_brown | 9547   | CXCL14     |
| SZ_Networks | Coexp_Module_brown | 50861  | STMN3      |
| SZ_Networks | Coexp_Module_brown | 23413  | NCS1       |
| SZ_Networks | Coexp_Module_brown | 84146  | ZNF644     |
| SZ_Networks | Coexp_Module_brown | 79956  | ERMP1      |
| SZ_Networks | Coexp_Module_brown | 54443  | ANLN       |
| SZ_Networks | Coexp_Module_brown | 54801  | HAUS6      |
| SZ_Networks | Coexp_Module_brown | 55331  | ACER3      |
| SZ_Networks | Coexp_Module_brown | 55151  | TMEM38B    |
| SZ_Networks | Coexp_Module_brown | 64792  | RABL5      |
| SZ_Networks | Coexp_Module_brown | 79644  | SRD5A3     |
| SZ_Networks | Coexp_Module_brown | 55248  | TMEM206    |
| SZ_Networks | Coexp_Module_brown | 56896  | DPYSL5     |
| SZ_Networks | Coexp_Module_brown | 56952  | PRTFDC1    |
| SZ_Networks | Coexp_Module_brown | 9462   | RASAL2     |
| SZ_Networks | Coexp_Module_brown | 57690  | TNRC6C     |
| SZ_Networks | Coexp_Module_brown | 27345  | KCNMB4     |
| SZ_Networks | Coexp_Module_brown | 28982  | FLVCR1     |
| SZ_Networks | Coexp_Module_brown | 10888  | GPR83      |
| SZ_Networks | Coexp_Module_brown | 55004  | LAMTOR1    |
| SZ_Networks | Coexp_Module_brown | 51248  | PDZD11     |
| SZ_Networks | Coexp_Module_brown | 54461  | FBXW5      |
| SZ_Networks | Coexp_Module_brown | 83641  | FAM107B    |
| SZ_Networks | Coexp_Module_brown | 83543  | AIF1L      |
| SZ_Networks | Coexp_Module_brown | 54888  | NSUN2      |
| SZ_Networks | Coexp_Module_brown | 55862  | ECHDC1     |
| SZ_Networks | Coexp_Module_brown | 25962  | KIAA1429   |
| SZ_Networks | Coexp_Module_brown | 58480  | RHOU       |
| SZ_Networks | Coexp_Module_brown | 26022  | TMEM98     |
| SZ_Networks | Coexp_Module_brown | 221294 | NT5DC1     |
| SZ_Networks | Coexp_Module_brown | 83719  | YPEL3      |
| SZ_Networks | Coexp_Module_brown | 63027  | SLC22A23   |
| SZ_Networks | Coexp_Module_brown | 55829  | VIMP       |
| SZ_Networks | Coexp_Module_brown | 84287  | ZDHC16     |
| SZ_Networks | Coexp_Module_brown | 55967  | NDUFA12    |
| SZ_Networks | Coexp_Module_brown | 55975  | KLHL7      |
| SZ_Networks | Coexp_Module_brown | 84640  | USP38      |
| SZ_Networks | Coexp_Module_brown | 84233  | TMEM126A   |
| SZ_Networks | Coexp_Module_brown | 666    | BOK        |
| SZ_Networks | Coexp_Module_brown | 55964  | SEPT3      |
| SZ_Networks | Coexp_Module_brown | 84261  | FBXW9      |
| SZ_Networks | Coexp_Module_brown | 93183  | PIGM       |
| SZ_Networks | Coexp_Module_brown | 83690  | CRISPLD1   |
| SZ_Networks | Coexp_Module_brown | 66000  | TMEM108    |
| SZ_Networks | Coexp_Module_brown | 57595  | PDZD4      |
| SZ_Networks | Coexp_Module_brown | 54880  | BCOR       |
| SZ_Networks | Coexp_Module_brown | 57467  | HHATL      |

|             |                    |        |            |
|-------------|--------------------|--------|------------|
| SZ_Networks | Coexp_Module_brown | 84288  | EFCAB2     |
| SZ_Networks | Coexp_Module_brown | 84735  | CNDP1      |
| SZ_Networks | Coexp_Module_brown | 10655  | DMRT2      |
| SZ_Networks | Coexp_Module_brown | 79992  | AGPAT4-IT1 |
| SZ_Networks | Coexp_Module_brown | 94015  | TTYH2      |
| SZ_Networks | Coexp_Module_brown | 55335  | NIPSNAP3B  |
| SZ_Networks | Coexp_Module_brown | 3798   | KIF5A      |
| SZ_Networks | Coexp_Module_brown | 28514  | DLL1       |
| SZ_Networks | Coexp_Module_brown | 11124  | FAF1       |
| SZ_Networks | Coexp_Module_brown | 27166  | PRELID1    |
| SZ_Networks | Coexp_Module_brown | 140803 | TRPM6      |
| SZ_Networks | Coexp_Module_brown | 84303  | CHCHD6     |
| SZ_Networks | Coexp_Module_brown | 84315  | MON1A      |
| SZ_Networks | Coexp_Module_brown | 56893  | UBQLN4     |
| SZ_Networks | Coexp_Module_brown | 57731  | SPTBN4     |
| SZ_Networks | Coexp_Module_brown | 50809  | HP1BP3     |
| SZ_Networks | Coexp_Module_brown | 57448  | BIRC6      |
| SZ_Networks | Coexp_Module_brown | 121665 | SPPL3      |
| SZ_Networks | Coexp_Module_brown | 1073   | CFL2       |
| SZ_Networks | Coexp_Module_brown | 197370 | NSMCE1     |
| SZ_Networks | Coexp_Module_brown | 114823 | LENG8      |
| SZ_Networks | Coexp_Module_brown | 23184  | MESDC2     |
| SZ_Networks | Coexp_Module_brown | 4301   | MLLT4      |
| SZ_Networks | Coexp_Module_brown | 347734 | SLC35B2    |
| SZ_Networks | Coexp_Module_brown | 83986  | ITFG3      |
| SZ_Networks | Coexp_Module_brown | 57584  | ARHGAP21   |
| SZ_Networks | Coexp_Module_brown | 55677  | IWS1       |
| SZ_Networks | Coexp_Module_brown | 51148  | CERCAM     |
| SZ_Networks | Coexp_Module_brown | 26277  | TINF2      |
| SZ_Networks | Coexp_Module_brown | 88455  | ANKRD13A   |
| SZ_Networks | Coexp_Module_brown | 149951 | COMMD7     |
| SZ_Networks | Coexp_Module_brown | 6272   | SORT1      |
| SZ_Networks | Coexp_Module_brown | 84896  | ATAD1      |
| SZ_Networks | Coexp_Module_brown | 84188  | FAR1       |
| SZ_Networks | Coexp_Module_brown | 440574 | MINOS1     |
| SZ_Networks | Coexp_Module_brown | 57609  | DIP2B      |
| SZ_Networks | Coexp_Module_brown | 51082  | POLR1D     |
| SZ_Networks | Coexp_Module_brown | 64951  | MRPS24     |
| SZ_Networks | Coexp_Module_brown | 950    | SCARB2     |
| SZ_Networks | Coexp_Module_brown | 121260 | SLC15A4    |
| SZ_Networks | Coexp_Module_brown | 56927  | GPR108     |
| SZ_Networks | Coexp_Module_brown | 9517   | SPTLC2     |
| SZ_Networks | Coexp_Module_brown | 5814   | PURB       |
| SZ_Networks | Coexp_Module_brown | 221184 | CPNE2      |
| SZ_Networks | Coexp_Module_brown | 26224  | FBXL3      |
| SZ_Networks | Coexp_Module_brown | 6242   | RTKN       |
| SZ_Networks | Coexp_Module_brown | 152503 | SH3D19     |
| SZ_Networks | Coexp_Module_brown | 64645  | HIAT1      |
| SZ_Networks | Coexp_Module_brown | 128338 | DRAM2      |
| SZ_Networks | Coexp_Module_brown | 55766  | H2AFJ      |
| SZ_Networks | Coexp_Module_brown | 22834  | ZNF652     |
| SZ_Networks | Coexp_Module_brown | 10085  | EDIL3      |
| SZ_Networks | Coexp_Module_brown | 127829 | ARL8A      |
| SZ_Networks | Coexp_Module_brown | 54492  | NEURL1B    |
| SZ_Networks | Coexp_Module_brown | 5728   | PTEN       |
| SZ_Networks | Coexp_Module_brown | 91461  | PKDCC      |
| SZ_Networks | Coexp_Module_brown | 90135  | BTBD6      |
| SZ_Networks | Coexp_Module_brown | 51621  | KLF13      |

|             |                    |        |           |
|-------------|--------------------|--------|-----------|
| SZ_Networks | Coexp_Module_brown | 84340  | GFM2      |
| SZ_Networks | Coexp_Module_brown | 116461 | TSEN15    |
| SZ_Networks | Coexp_Module_brown | 84833  | USMG5     |
| SZ_Networks | Coexp_Module_brown | 84316  | LSMD1     |
| SZ_Networks | Coexp_Module_brown | 9117   | SEC22C    |
| SZ_Networks | Coexp_Module_brown | 85013  | TMEM128   |
| SZ_Networks | Coexp_Module_brown | 127687 | C1orf122  |
| SZ_Networks | Coexp_Module_brown | 64773  | PCED1A    |
| SZ_Networks | Coexp_Module_brown | 4133   | MAP2      |
| SZ_Networks | Coexp_Module_brown | 641638 | SNHG6     |
| SZ_Networks | Coexp_Module_brown | 54998  | AURKAIP1  |
| SZ_Networks | Coexp_Module_brown | 255967 | PAN3      |
| SZ_Networks | Coexp_Module_brown | 221178 | SPATA13   |
| SZ_Networks | Coexp_Module_brown | 201965 | RWDD4     |
| SZ_Networks | Coexp_Module_brown | 57210  | SLC45A4   |
| SZ_Networks | Coexp_Module_brown | 122060 | SLAIN1    |
| SZ_Networks | Coexp_Module_brown | 92017  | SNX29     |
| SZ_Networks | Coexp_Module_brown | 57556  | SEMA6A    |
| SZ_Networks | Coexp_Module_brown | 84899  | TMTC4     |
| SZ_Networks | Coexp_Module_brown | 57666  | FBRSL1    |
| SZ_Networks | Coexp_Module_brown | 90799  | CEP95     |
| SZ_Networks | Coexp_Module_brown | 57475  | PLEKHH1   |
| SZ_Networks | Coexp_Module_brown | 4040   | LRP6      |
| SZ_Networks | Coexp_Module_brown | 221035 | REEP3     |
| SZ_Networks | Coexp_Module_brown | 91689  | SMDT1     |
| SZ_Networks | Coexp_Module_brown | 124512 | METTTL23  |
| SZ_Networks | Coexp_Module_brown | 54893  | MTMR10    |
| SZ_Networks | Coexp_Module_brown | 54464  | XRN1      |
| SZ_Networks | Coexp_Module_brown | 10814  | CPLX2     |
| SZ_Networks | Coexp_Module_brown | 128218 | TMEM125   |
| SZ_Networks | Coexp_Module_brown | 6558   | SLC12A2   |
| SZ_Networks | Coexp_Module_brown | 7008   | TEF       |
| SZ_Networks | Coexp_Module_brown | 56655  | POLE4     |
| SZ_Networks | Coexp_Module_brown | 2342   | FNTB      |
| SZ_Networks | Coexp_Module_brown | 115286 | SLC25A26  |
| SZ_Networks | Coexp_Module_brown | 57185  | NIPAL3    |
| SZ_Networks | Coexp_Module_brown | 80018  | NAA25     |
| SZ_Networks | Coexp_Module_brown | 128869 | PIGU      |
| SZ_Networks | Coexp_Module_brown | 84334  | APOPT1    |
| SZ_Networks | Coexp_Module_brown | 340371 | NRBP2     |
| SZ_Networks | Coexp_Module_brown | 169200 | TMEM64    |
| SZ_Networks | Coexp_Module_brown | 2549   | GAB1      |
| SZ_Networks | Coexp_Module_brown | 55917  | CTTNBP2NL |
| SZ_Networks | Coexp_Module_brown | 835    | CASP2     |
| SZ_Networks | Coexp_Module_brown | 80176  | SPSB1     |
| SZ_Networks | Coexp_Module_brown | 57466  | SCAF4     |
| SZ_Networks | Coexp_Module_brown | 64398  | MPP5      |
| SZ_Networks | Coexp_Module_brown | 81790  | RNF170    |
| SZ_Networks | Coexp_Module_brown | 50862  | RNF141    |
| SZ_Networks | Coexp_Module_brown | 54149  | C21orf91  |
| SZ_Networks | Coexp_Module_brown | 6443   | SGCB      |
| SZ_Networks | Coexp_Module_brown | 9946   | CRYZL1    |
| SZ_Networks | Coexp_Module_brown | 51228  | GLTP      |
| SZ_Networks | Coexp_Module_brown | 2065   | ERBB3     |
| SZ_Networks | Coexp_Module_brown | 401548 | SNX30     |
| SZ_Networks | Coexp_Module_brown | 64960  | MRPS15    |
| SZ_Networks | Coexp_Module_brown | 122622 | ADSSL1    |
| SZ_Networks | Coexp_Module_brown | 130872 | AHSA2     |

|             |                    |        |           |
|-------------|--------------------|--------|-----------|
| SZ_Networks | Coexp_Module_brown | 121053 | C12orf45  |
| SZ_Networks | Coexp_Module_brown | 3092   | HIP1      |
| SZ_Networks | Coexp_Module_brown | 51529  | ANAPC11   |
| SZ_Networks | Coexp_Module_brown | 90522  | YIF1B     |
| SZ_Networks | Coexp_Module_brown | 84915  | FAM222A   |
| SZ_Networks | Coexp_Module_brown | 57458  | TMCC3     |
| SZ_Networks | Coexp_Module_brown | 80031  | SEMA6D    |
| SZ_Networks | Coexp_Module_brown | 84186  | ZCCHC7    |
| SZ_Networks | Coexp_Module_brown | 4124   | MAN2A1    |
| SZ_Networks | Coexp_Module_brown | 388228 | SBK1      |
| SZ_Networks | Coexp_Module_brown | 1609   | DGKQ      |
| SZ_Networks | Coexp_Module_brown | 26528  | DAZAP1    |
| SZ_Networks | Coexp_Module_brown | 5337   | PLD1      |
| SZ_Networks | Coexp_Module_brown | 57636  | ARHGAP23  |
| SZ_Networks | Coexp_Module_brown | 3344   | FOXN2     |
| SZ_Networks | Coexp_Module_brown | 129642 | MBOAT2    |
| SZ_Networks | Coexp_Module_brown | 5208   | PFKFB2    |
| SZ_Networks | Coexp_Module_brown | 143684 | FAM76B    |
| SZ_Networks | Coexp_Module_brown | 91404  | SESTD1    |
| SZ_Networks | Coexp_Module_brown | 7566   | ZNF18     |
| SZ_Networks | Coexp_Module_brown | 90990  | KIFC2     |
| SZ_Networks | Coexp_Module_brown | 283267 | LINC00294 |
| SZ_Networks | Coexp_Module_brown | 55858  | TMEM165   |
| SZ_Networks | Coexp_Module_brown | 130502 | TTC32     |
| SZ_Networks | Coexp_Module_brown | 53944  | CSNK1G1   |
| SZ_Networks | Coexp_Module_brown | 30812  | SOX8      |
| SZ_Networks | Coexp_Module_brown | 84502  | JPH4      |
| SZ_Networks | Coexp_Module_brown | 132864 | CPEB2     |
| SZ_Networks | Coexp_Module_brown | 128434 | VSTM2L    |
| SZ_Networks | Coexp_Module_brown | 11102  | RPP14     |
| SZ_Networks | Coexp_Module_brown | 94274  | PPP1R14A  |
| SZ_Networks | Coexp_Module_brown | 283635 | FAM177A1  |
| SZ_Networks | Coexp_Module_brown | 65124  | SOWAHC    |
| SZ_Networks | Coexp_Module_brown | 25914  | RTTN      |
| SZ_Networks | Coexp_Module_brown | 57519  | STARD9    |
| SZ_Networks | Coexp_Module_brown | 643988 | C1orf233  |
| SZ_Networks | Coexp_Module_brown | 64975  | MRPL41    |
| SZ_Networks | Coexp_Module_brown | 59271  | EVA1C     |
| SZ_Networks | Coexp_Module_brown | 6872   | TAF1      |
| SZ_Networks | Coexp_Module_brown | 338657 | CCDC84    |
| SZ_Networks | Coexp_Module_brown | 57482  | KIAA1211  |
| SZ_Networks | Coexp_Module_brown | 134359 | POC5      |
| SZ_Networks | Coexp_Module_brown | 388962 | BOLA3     |
| SZ_Networks | Coexp_Module_brown | 1954   | MEGF8     |
| SZ_Networks | Coexp_Module_brown | 140685 | ZBTB46    |
| SZ_Networks | Coexp_Module_brown | 159195 | USP54     |
| SZ_Networks | Coexp_Module_brown | 4784   | NFIX      |
| SZ_Networks | Coexp_Module_brown | 286343 | LURAP1L   |
| SZ_Networks | Coexp_Module_brown | 221545 | C6orf136  |
| SZ_Networks | Coexp_Module_brown | 23383  | MAU2      |
| SZ_Networks | Coexp_Module_brown | 154043 | CNKSR3    |
| SZ_Networks | Coexp_Module_brown | 51104  | ABHD17B   |
| SZ_Networks | Coexp_Module_brown | 84749  | USP30     |
| SZ_Networks | Coexp_Module_brown | 55051  | NRDE2     |
| SZ_Networks | Coexp_Module_brown | 123283 | TARSL2    |
| SZ_Networks | Coexp_Module_brown | 146330 | FBXL16    |
| SZ_Networks | Coexp_Module_brown | 140730 | RIMS4     |
| SZ_Networks | Coexp_Module_brown | 91419  | XRCC6BP1  |

|             |                    |        |            |
|-------------|--------------------|--------|------------|
| SZ_Networks | Coexp_Module_brown | 219844 | HYLS1      |
| SZ_Networks | Coexp_Module_brown | 2770   | GNAI1      |
| SZ_Networks | Coexp_Module_brown | 389337 | ARHGEF37   |
| SZ_Networks | Coexp_Module_brown | 90390  | MED30      |
| SZ_Networks | Coexp_Module_brown | 643836 | ZFP62      |
| SZ_Networks | Coexp_Module_brown | 132720 | C4orf32    |
| SZ_Networks | Coexp_Module_brown | 85358  | SHANK3     |
| SZ_Networks | Coexp_Module_brown | 83786  | FRMD8      |
| SZ_Networks | Coexp_Module_brown | 79183  | TTPAL      |
| SZ_Networks | Coexp_Module_brown | 91683  | SYT12      |
| SZ_Networks | Coexp_Module_brown | 143903 | LAYN       |
| SZ_Networks | Coexp_Module_brown | 29116  | MYLIP      |
| SZ_Networks | Coexp_Module_brown | 91584  | PLXNA4     |
| SZ_Networks | Coexp_Module_brown | 2067   | ERCC1      |
| SZ_Networks | Coexp_Module_brown | 339263 | C17orf51   |
| SZ_Networks | Coexp_Module_brown | 196500 | PIANP      |
| SZ_Networks | Coexp_Module_brown | 115548 | FCHO2      |
| SZ_Networks | Coexp_Module_brown | 147906 | DACT3      |
| SZ_Networks | Coexp_Module_brown | 54620  | FBXL19     |
| SZ_Networks | Coexp_Module_brown | 55857  | PLK1S1     |
| SZ_Networks | Coexp_Module_brown | 91614  | DEPDC7     |
| SZ_Networks | Coexp_Module_brown | 285464 | CRIPAK     |
| SZ_Networks | Coexp_Module_brown | 92558  | CCDC64     |
| SZ_Networks | Coexp_Module_brown | 1600   | DAB1       |
| SZ_Networks | Coexp_Module_brown | 5010   | CLDN11     |
| SZ_Networks | Coexp_Module_brown | 114825 | PWWP2A     |
| SZ_Networks | Coexp_Module_brown | 118812 | MORN4      |
| SZ_Networks | Coexp_Module_brown | 170371 | C10orf128  |
| SZ_Networks | Coexp_Module_brown | 152404 | IGSF11     |
| SZ_Networks | Coexp_Module_brown | 84327  | ZBED3      |
| SZ_Networks | Coexp_Module_brown | 3749   | KCNC4      |
| SZ_Networks | Coexp_Module_brown | 344558 | SH3RF3     |
| SZ_Networks | Coexp_Module_brown | 23446  | SLC44A1    |
| SZ_Networks | Coexp_Module_brown | 55356  | SLC22A15   |
| SZ_Networks | Coexp_Module_brown | 91133  | L3MBTL4    |
| SZ_Networks | Coexp_Module_brown | 401022 | HOXD-AS1   |
| SZ_Networks | Coexp_Module_brown | 10096  | ACTR3      |
| SZ_Networks | Coexp_Module_brown | 55314  | TMEM144    |
| SZ_Networks | Coexp_Module_brown | 5629   | PROX1      |
| SZ_Networks | Coexp_Module_brown | 10505  | SEMA4F     |
| SZ_Networks | Coexp_Module_brown | 56895  | AGPAT4     |
| SZ_Networks | Coexp_Module_brown | 85414  | SLC45A3    |
| SZ_Networks | Coexp_Module_brown | 113510 | HELQ       |
| SZ_Networks | Coexp_Module_brown | 374875 | HSD11B1L   |
| SZ_Networks | Coexp_Module_brown | 143879 | KBTBD3     |
| SZ_Networks | Coexp_Module_brown | 23528  | ZNF281     |
| SZ_Networks | Coexp_Module_brown | 10507  | SEMA4D     |
| SZ_Networks | Coexp_Module_brown | 80312  | TET1       |
| SZ_Networks | Coexp_Module_brown | 84307  | ZNF397     |
| SZ_Networks | Coexp_Module_brown | 144811 | LACC1      |
| SZ_Networks | Coexp_Module_brown | 117584 | RFFL       |
| SZ_Networks | Coexp_Module_brown | 57571  | CARNS1     |
| SZ_Networks | Coexp_Module_brown | 90673  | PPP1R3E    |
| SZ_Networks | Coexp_Module_brown | 441094 | NR2F1-AS1  |
| SZ_Networks | Coexp_Module_brown | 84190  | METTTL25   |
| SZ_Networks | Coexp_Module_brown | 57558  | USP35      |
| SZ_Networks | Coexp_Module_brown | 400242 | DICER1-AS1 |
| SZ_Networks | Coexp_Module_brown | 22874  | PLEKHA6    |

|             |                    |        |           |
|-------------|--------------------|--------|-----------|
| SZ_Networks | Coexp_Module_brown | 170463 | SSBP4     |
| SZ_Networks | Coexp_Module_brown | 57338  | JPH3      |
| SZ_Networks | Coexp_Module_brown | 89801  | PPP1R3F   |
| SZ_Networks | Coexp_Module_brown | 2909   | ARHGAP35  |
| SZ_Networks | Coexp_Module_brown | 148418 | SAMD13    |
| SZ_Networks | Coexp_Module_brown | 79939  | SLC35E1   |
| SZ_Networks | Coexp_Module_brown | 138639 | PTPDC1    |
| SZ_Networks | Coexp_Module_brown | 2562   | GABRB3    |
| SZ_Networks | Coexp_Module_brown | 57507  | ZNF608    |
| SZ_Networks | Coexp_Module_brown | 55095  | SAMD4B    |
| SZ_Networks | Coexp_Module_brown | 118738 | ZNF488    |
| SZ_Networks | Coexp_Module_brown | 133121 | ENPP6     |
| SZ_Networks | Coexp_Module_brown | 388662 | SLC6A17   |
| SZ_Networks | Coexp_Module_brown | 2055   | CLN8      |
| SZ_Networks | Coexp_Module_brown | 768206 | PRCD      |
| SZ_Networks | Coexp_Module_brown | 84545  | MRPL43    |
| SZ_Networks | Coexp_Module_brown | 64172  | OSGEPL1   |
| SZ_Networks | Coexp_Module_brown | 170692 | ADAMTS18  |
| SZ_Networks | Coexp_Module_brown | 6900   | CNTN2     |
| SZ_Networks | Coexp_Module_brown | 51735  | RAPGEF6   |
| SZ_Networks | Coexp_Module_brown | 145270 | PRIMA1    |
| SZ_Networks | Coexp_Module_brown | 389084 | C2orf82   |
| SZ_Networks | Coexp_Module_brown | 80005  | DOCK5     |
| SZ_Networks | Coexp_Module_brown | 342035 | GLDN      |
| SZ_Networks | Coexp_Module_brown | 55471  | NDUFAF7   |
| SZ_Networks | Coexp_Module_brown | 53637  | S1PR5     |
| SZ_Networks | Coexp_Module_brown | 388135 | C15orf59  |
| SZ_Networks | Coexp_Module_brown | 387914 | SHISA2    |
| SZ_Networks | Coexp_Module_brown | 220108 | FAM124A   |
| SZ_Networks | Coexp_Module_brown | 94032  | CAMK2N2   |
| SZ_Networks | Coexp_Module_brown | 23250  | ATP11A    |
| SZ_Networks | Coexp_Module_brown | 10361  | NPM2      |
| SZ_Networks | Coexp_Module_brown | 117283 | IP6K3     |
| SZ_Networks | Coexp_Module_brown | 64147  | KIF9      |
| SZ_Networks | Coexp_Module_brown | 11046  | SLC35D2   |
| SZ_Networks | Coexp_Module_brown | 23544  | SEZ6L     |
| SZ_Networks | Coexp_Module_brown | 127281 | FAM213B   |
| SZ_Networks | Coexp_Module_brown | 51068  | NMD3      |
| SZ_Networks | Coexp_Module_brown | 347689 | SOX2-OT   |
| SZ_Networks | Coexp_Module_brown | 57471  | ERMN      |
| SZ_Networks | Coexp_Module_brown | 220164 | DOK6      |
| SZ_Networks | Coexp_Module_brown | 439949 | PRKCQ-AS1 |
| SZ_Networks | Coexp_Module_brown | 85445  | CNTNAP4   |
| SZ_Networks | Coexp_Module_brown | 340351 | AGBL3     |
| SZ_Networks | Coexp_Module_brown | 57622  | LRFN1     |
| SZ_Networks | Coexp_Module_brown | 55968  | NSFL1C    |
| SZ_Networks | Coexp_Module_brown | 158038 | LINGO2    |
| SZ_Networks | Coexp_Module_brown | 284615 | ANKRD34A  |
| SZ_Networks | Coexp_Module_brown | 26297  | SERGEF    |
| SZ_Networks | Coexp_Module_brown | 282973 | JAKMIP3   |
| SZ_Networks | Coexp_Module_brown | 9328   | GTF3C5    |
| SZ_Networks | Coexp_Module_brown | 55593  | OTUD5     |
| SZ_Networks | Coexp_Module_brown | 160    | AP2A1     |
| SZ_Networks | Coexp_Module_brown | 55902  | ACSS2     |
| SZ_Networks | Coexp_Module_brown | 54832  | VPS13C    |
| SZ_Networks | Coexp_Module_brown | 161742 | SPRED1    |
| SZ_Networks | Coexp_Module_brown | 201725 | C4orf46   |
| SZ_Networks | Coexp_Module_brown | 222223 | KIAA1324L |

|             |                    |           |            |
|-------------|--------------------|-----------|------------|
| SZ_Networks | Coexp_Module_brown | 339983    | NAT8L      |
| SZ_Networks | Coexp_Module_brown | 50859     | SPOCK3     |
| SZ_Networks | Coexp_Module_brown | 27031     | NPHP3      |
| SZ_Networks | Coexp_Module_brown | 219287    | AMER2      |
| SZ_Networks | Coexp_Module_brown | 286827    | TRIM59     |
| SZ_Networks | Coexp_Module_brown | 344595    | LINC00883  |
| SZ_Networks | Coexp_Module_brown | 160335    | TMTC2      |
| SZ_Networks | Coexp_Module_brown | 119392    | SFR1       |
| SZ_Networks | Coexp_Module_brown | 84530     | SRRM4      |
| SZ_Networks | Coexp_Module_brown | 121601    | ANO4       |
| SZ_Networks | Coexp_Module_brown | 3996      | LLGL1      |
| SZ_Networks | Coexp_Module_brown | 115584    | SLC5A11    |
| SZ_Networks | Coexp_Module_brown | 114786    | XKR4       |
| SZ_Networks | Coexp_Module_brown | 285800    | PRR18      |
| SZ_Networks | Coexp_Module_brown | 643911    | CRNDE      |
| SZ_Networks | Coexp_Module_brown | 203190    | LGI3       |
| SZ_Networks | Coexp_Module_brown | 338328    | GPIHBP1    |
| SZ_Networks | Coexp_Module_brown | 116362    | RBP7       |
| SZ_Networks | Coexp_Module_brown | 8110      | DPF3       |
| SZ_Networks | Coexp_Module_brown | 284323    | ZNF780A    |
| SZ_Networks | Coexp_Module_brown | 5137      | PDE1C      |
| SZ_Networks | Coexp_Module_brown | 134549    | SHROOM1    |
| SZ_Networks | Coexp_Module_brown | 84083     | ZRANB3     |
| SZ_Networks | Coexp_Module_brown | 93377     | OPALIN     |
| SZ_Networks | Coexp_Module_brown | 254251    | LCORL      |
| SZ_Networks | Coexp_Module_brown | 100505929 | C21orf37   |
| SZ_Networks | Coexp_Module_brown | 154215    | NKAIN2     |
| SZ_Networks | Coexp_Module_brown | 1745      | DLX1       |
| SZ_Networks | Coexp_Module_brown | 151647    | FAM19A4    |
| SZ_Networks | Coexp_Module_brown | 777       | CACNA1E    |
| SZ_Networks | Coexp_Module_brown | 145788    | C15orf65   |
| SZ_Networks | Coexp_Module_brown | 345630    | FBLL1      |
| SZ_Networks | Coexp_Module_brown | 253650    | ANKRD18A   |
| SZ_Networks | Coexp_Module_brown | 1378      | CR1        |
| SZ_Networks | Coexp_Module_brown | 133022    | TRAM1L1    |
| SZ_Networks | Coexp_Module_brown | 100128252 | ZNF667-AS1 |
| SZ_Networks | Coexp_Module_brown | 10634     | GAS2L1     |
| SZ_Networks | Coexp_Module_brown | 23625     | FAM89B     |
| SZ_Networks | Coexp_Module_brown | 6253      | RTN2       |
| SZ_Networks | Coexp_Module_brown | 203069    | R3HCC1     |
| SZ_Networks | Coexp_Module_brown | 9905      | SGSM2      |
| SZ_Networks | Coexp_Module_brown | 4681      | NBL1       |
| SZ_Networks | Coexp_Module_brown | 933       | CD22       |
| SZ_Networks | Coexp_Module_brown | 6305      | SBF1       |
| SZ_Networks | Coexp_Module_brown | 26051     | PPP1R16B   |
| SZ_Networks | Coexp_Module_brown | 150726    | FBXO41     |
| SZ_Networks | Coexp_Module_brown | 57406     | ABHD6      |
| SZ_Networks | Coexp_Module_brown | 54985     | HCFC1R1    |
| SZ_Networks | Coexp_Module_brown | 55101     | ATP5SL     |
| SZ_Networks | Coexp_Module_brown | 54910     | SEMA4C     |
| SZ_Networks | Coexp_Module_brown | 93643     | TJAP1      |
| SZ_Networks | Coexp_Module_brown | 112869    | CCDC101    |
| SZ_Networks | Coexp_Module_brown | 7942      | TFEB       |
| SZ_Networks | Coexp_Module_brown | 26088     | GGA1       |
| SZ_Networks | Coexp_Module_brown | 196743    | PAOX       |
| SZ_Networks | Coexp_Module_brown | 89853     | MVB12B     |
| SZ_Networks | Coexp_Module_brown | 79701     | OGFOD3     |
| SZ_Networks | Coexp_Module_brown | 83637     | ZMIZ2      |



|             |                         |        |          |
|-------------|-------------------------|--------|----------|
| SZ_Networks | Coexp_Module_brown      | 85377  | MICALL1  |
| SZ_Networks | Coexp_Module_brown      | 64834  | ELOVL1   |
| SZ_Networks | Coexp_Module_brown      | 55223  | TRIM62   |
| SZ_Networks | Coexp_Module_brown      | 5526   | PPP2R5B  |
| SZ_Networks | Coexp_Module_brown      | 57175  | CORO1B   |
| SZ_Networks | Coexp_Module_brown      | 79583  | TMEM231  |
| SZ_Networks | Coexp_Module_brown      | 79874  | RABEP2   |
| SZ_Networks | Coexp_Module_darkorange | 7494   | XBP1     |
| SZ_Networks | Coexp_Module_darkorange | 813    | CALU     |
| SZ_Networks | Coexp_Module_darkorange | 8531   | YBX3     |
| SZ_Networks | Coexp_Module_darkorange | 9775   | EIF4A3   |
| SZ_Networks | Coexp_Module_darkorange | 7538   | ZFP36    |
| SZ_Networks | Coexp_Module_darkorange | 4860   | PNP      |
| SZ_Networks | Coexp_Module_darkorange | 3615   | IMPDH2   |
| SZ_Networks | Coexp_Module_darkorange | 2171   | FABP5    |
| SZ_Networks | Coexp_Module_darkorange | 4147   | MATN2    |
| SZ_Networks | Coexp_Module_darkorange | 5209   | PFKFB3   |
| SZ_Networks | Coexp_Module_darkorange | 22918  | CD93     |
| SZ_Networks | Coexp_Module_darkorange | 604    | BCL6     |
| SZ_Networks | Coexp_Module_darkorange | 1647   | GADD45A  |
| SZ_Networks | Coexp_Module_darkorange | 8460   | TPST1    |
| SZ_Networks | Coexp_Module_darkorange | 1017   | CDK2     |
| SZ_Networks | Coexp_Module_darkorange | 2152   | F3       |
| SZ_Networks | Coexp_Module_darkorange | 2669   | GEM      |
| SZ_Networks | Coexp_Module_darkorange | 5277   | PIGA     |
| SZ_Networks | Coexp_Module_darkorange | 5966   | REL      |
| SZ_Networks | Coexp_Module_darkorange | 5606   | MAP2K3   |
| SZ_Networks | Coexp_Module_darkorange | 11167  | FSTL1    |
| SZ_Networks | Coexp_Module_darkorange | 60481  | ELOVL5   |
| SZ_Networks | Coexp_Module_darkorange | 1407   | CRY1     |
| SZ_Networks | Coexp_Module_darkorange | 3082   | HGF      |
| SZ_Networks | Coexp_Module_darkorange | 4013   | VWA5A    |
| SZ_Networks | Coexp_Module_darkorange | 4928   | NUP98    |
| SZ_Networks | Coexp_Module_darkorange | 26018  | LRIG1    |
| SZ_Networks | Coexp_Module_darkorange | 1973   | EIF4A1   |
| SZ_Networks | Coexp_Module_darkorange | 23516  | SLC39A14 |
| SZ_Networks | Coexp_Module_darkorange | 3987   | LIMS1    |
| SZ_Networks | Coexp_Module_darkorange | 1992   | SERPINB1 |
| SZ_Networks | Coexp_Module_darkorange | 6432   | SRSF7    |
| SZ_Networks | Coexp_Module_darkorange | 6464   | SHC1     |
| SZ_Networks | Coexp_Module_darkorange | 3995   | FADS3    |
| SZ_Networks | Coexp_Module_darkorange | 339479 | FAM5C    |
| SZ_Networks | Coexp_Module_darkorange | 10135  | NAMPT    |
| SZ_Networks | Coexp_Module_darkorange | 79042  | TSEN34   |
| SZ_Networks | Coexp_Module_darkorange | 6322   | SCML1    |
| SZ_Networks | Coexp_Module_darkorange | 51129  | ANGPTL4  |
| SZ_Networks | Coexp_Module_darkorange | 54915  | YTHDF1   |
| SZ_Networks | Coexp_Module_darkorange | 25825  | BACE2    |
| SZ_Networks | Coexp_Module_darkorange | 10783  | NEK6     |
| SZ_Networks | Coexp_Module_darkorange | 64332  | NFKBIZ   |
| SZ_Networks | Coexp_Module_darkorange | 200916 | RPL22L1  |
| SZ_Networks | Coexp_Module_darkorange | 284207 | METRNL   |
| SZ_Networks | Coexp_Module_darkorange | 56975  | FAM20C   |
| SZ_Networks | Coexp_Module_darkorange | 195827 | AAED1    |
| SZ_Networks | Coexp_Module_darkorange | 51050  | PI15     |
| SZ_Networks | Coexp_Module_darkorange | 283131 | NEAT1    |
| SZ_Networks | Coexp_Module_lightcyan  | 377    | ARF3     |
| SZ_Networks | Coexp_Module_lightcyan  | 8933   | FAM127A  |

|             |                        |           |          |
|-------------|------------------------|-----------|----------|
| SZ_Networks | Coexp_Module_lightcyan | 5590      | PRKCZ    |
| SZ_Networks | Coexp_Module_lightcyan | 3064      | HTT      |
| SZ_Networks | Coexp_Module_lightcyan | 1400      | CRMP1    |
| SZ_Networks | Coexp_Module_lightcyan | 140885    | SIRPA    |
| SZ_Networks | Coexp_Module_lightcyan | 9915      | ARNT2    |
| SZ_Networks | Coexp_Module_lightcyan | 5799      | PTPRN2   |
| SZ_Networks | Coexp_Module_lightcyan | 23229     | ARHGEF9  |
| SZ_Networks | Coexp_Module_lightcyan | 8514      | KCNAB2   |
| SZ_Networks | Coexp_Module_lightcyan | 9797      | TATDN2   |
| SZ_Networks | Coexp_Module_lightcyan | 4900      | NRGN     |
| SZ_Networks | Coexp_Module_lightcyan | 1020      | CDK5     |
| SZ_Networks | Coexp_Module_lightcyan | 23641     | LDOC1    |
| SZ_Networks | Coexp_Module_lightcyan | 2039      | DMTN     |
| SZ_Networks | Coexp_Module_lightcyan | 9764      | KIAA0513 |
| SZ_Networks | Coexp_Module_lightcyan | 8927      | BSN      |
| SZ_Networks | Coexp_Module_lightcyan | 5218      | CDK14    |
| SZ_Networks | Coexp_Module_lightcyan | 9796      | PHYHIP   |
| SZ_Networks | Coexp_Module_lightcyan | 3785      | KCNQ2    |
| SZ_Networks | Coexp_Module_lightcyan | 8941      | CDK5R2   |
| SZ_Networks | Coexp_Module_lightcyan | 3706      | ITPKA    |
| SZ_Networks | Coexp_Module_lightcyan | 10900     | RUNDC3A  |
| SZ_Networks | Coexp_Module_lightcyan | 23221     | RHOBTB2  |
| SZ_Networks | Coexp_Module_lightcyan | 25864     | ABHD14A  |
| SZ_Networks | Coexp_Module_lightcyan | 53335     | BCL11A   |
| SZ_Networks | Coexp_Module_lightcyan | 84726     | PRRC2B   |
| SZ_Networks | Coexp_Module_lightcyan | 2036      | EPB41L1  |
| SZ_Networks | Coexp_Module_lightcyan | 25999     | CLIP3    |
| SZ_Networks | Coexp_Module_lightcyan | 4628      | MYH10    |
| SZ_Networks | Coexp_Module_lightcyan | 9807      | IP6K1    |
| SZ_Networks | Coexp_Module_lightcyan | 57476     | GRAMD1B  |
| SZ_Networks | Coexp_Module_lightcyan | 5965      | RECQL    |
| SZ_Networks | Coexp_Module_lightcyan | 23031     | MAST3    |
| SZ_Networks | Coexp_Module_lightcyan | 460       | ASTN1    |
| SZ_Networks | Coexp_Module_lightcyan | 155066    | ATP6V0E2 |
| SZ_Networks | Coexp_Module_lightcyan | 441151    | TMEM151B |
| SZ_Networks | Coexp_Module_lightcyan | 23316     | CUX2     |
| SZ_Networks | Coexp_Module_lightcyan | 8497      | PPFIA4   |
| SZ_Networks | Coexp_Module_lightcyan | 1759      | DNM1     |
| SZ_Networks | Coexp_Module_lightcyan | 64771     | C6orf106 |
| SZ_Networks | Coexp_Module_lightcyan | 79762     | C1orf115 |
| SZ_Networks | Coexp_Module_lightcyan | 27344     | PCSK1N   |
| SZ_Networks | Coexp_Module_lightcyan | 25789     | TMEM59L  |
| SZ_Networks | Coexp_Module_lightcyan | 79187     | FSD1     |
| SZ_Networks | Coexp_Module_lightcyan | 8506      | CNTNAP1  |
| SZ_Networks | Coexp_Module_lightcyan | 1008      | CDH10    |
| SZ_Networks | Coexp_Module_lightcyan | 5361      | PLXNA1   |
| SZ_Networks | Coexp_Module_lightcyan | 6853      | SYN1     |
| SZ_Networks | Coexp_Module_lightcyan | 54472     | TOLLIP   |
| SZ_Networks | Coexp_Module_lightcyan | 80700     | UBXN6    |
| SZ_Networks | Coexp_Module_lightcyan | 10815     | CPLX1    |
| SZ_Networks | Coexp_Module_lightcyan | 64101     | LRRC4    |
| SZ_Networks | Coexp_Module_lightcyan | 84258     | SYT3     |
| SZ_Networks | Coexp_Module_lightcyan | 400916    | CHCHD10  |
| SZ_Networks | Coexp_Module_lightcyan | 115024    | NT5C3B   |
| SZ_Networks | Coexp_Module_lightcyan | 55844     | PPP2R2D  |
| SZ_Networks | Coexp_Module_lightcyan | 100287932 | TIMM23   |
| SZ_Networks | Coexp_Module_lightcyan | 4254      | KITLG    |
| SZ_Networks | Coexp_Module_lightcyan | 57463     | AMIGO1   |

|             |                           |        |           |
|-------------|---------------------------|--------|-----------|
| SZ_Networks | Coexp_Module_lightcyan    | 285362 | SUMF1     |
| SZ_Networks | Coexp_Module_lightcyan    | 57504  | MTA3      |
| SZ_Networks | Coexp_Module_lightcyan    | 387921 | NHLRC3    |
| SZ_Networks | Coexp_Module_lightcyan    | 85300  | ATCAY     |
| SZ_Networks | Coexp_Module_lightcyan    | 126282 | TNFAIP8L1 |
| SZ_Networks | Coexp_Module_lightcyan    | 23025  | UNC13A    |
| SZ_Networks | Coexp_Module_lightcyan    | 387923 | SERP2     |
| SZ_Networks | Coexp_Module_lightcyan    | 3778   | KCNMA1    |
| SZ_Networks | Coexp_Module_lightcyan    | 1804   | DPP6      |
| SZ_Networks | Coexp_Module_lightcyan    | 7275   | TUB       |
| SZ_Networks | Coexp_Module_lightcyan    | 1740   | DLG2      |
| SZ_Networks | Coexp_Module_lightcyan    | 146713 | RBFOX3    |
| SZ_Networks | Coexp_Module_lightcyan    | 60680  | CELF5     |
| SZ_Networks | Coexp_Module_lightcyan    | 112755 | STX1B     |
| SZ_Networks | Coexp_Module_lightcyan    | 57689  | LRRC4C    |
| SZ_Networks | Coexp_Module_lightcyan    | 11346  | SYNPO     |
| SZ_Networks | Coexp_Module_lightcyan    | 784    | CACNB3    |
| SZ_Networks | Coexp_Module_lightcyan    | 55611  | OTUB1     |
| SZ_Networks | Coexp_Module_lightcyan    | 376267 | RAB15     |
| SZ_Networks | Coexp_Module_midnightblue | 6547   | SLC8A3    |
| SZ_Networks | Coexp_Module_midnightblue | 4478   | MSN       |
| SZ_Networks | Coexp_Module_midnightblue | 8407   | TAGLN2    |
| SZ_Networks | Coexp_Module_midnightblue | 79073  | TMEM109   |
| SZ_Networks | Coexp_Module_midnightblue | 678    | ZFP36L2   |
| SZ_Networks | Coexp_Module_midnightblue | 3487   | IGFBP4    |
| SZ_Networks | Coexp_Module_midnightblue | 26509  | MYOF      |
| SZ_Networks | Coexp_Module_midnightblue | 3597   | IL13RA1   |
| SZ_Networks | Coexp_Module_midnightblue | 25937  | WWTR1     |
| SZ_Networks | Coexp_Module_midnightblue | 3985   | LIMK2     |
| SZ_Networks | Coexp_Module_midnightblue | 3554   | IL1R1     |
| SZ_Networks | Coexp_Module_midnightblue | 22856  | CHSY1     |
| SZ_Networks | Coexp_Module_midnightblue | 11309  | SLCO2B1   |
| SZ_Networks | Coexp_Module_midnightblue | 9411   | ARHGAP29  |
| SZ_Networks | Coexp_Module_midnightblue | 1052   | CEBPD     |
| SZ_Networks | Coexp_Module_midnightblue | 571    | BACH1     |
| SZ_Networks | Coexp_Module_midnightblue | 4005   | LMO2      |
| SZ_Networks | Coexp_Module_midnightblue | 3087   | HHEX      |
| SZ_Networks | Coexp_Module_midnightblue | 1439   | CSF2RB    |
| SZ_Networks | Coexp_Module_midnightblue | 3570   | IL6R      |
| SZ_Networks | Coexp_Module_midnightblue | 5627   | PROS1     |
| SZ_Networks | Coexp_Module_midnightblue | 4904   | YBX1      |
| SZ_Networks | Coexp_Module_midnightblue | 9124   | PDLIM1    |
| SZ_Networks | Coexp_Module_midnightblue | 7037   | TFRC      |
| SZ_Networks | Coexp_Module_midnightblue | 7048   | TGFBR2    |
| SZ_Networks | Coexp_Module_midnightblue | 5175   | PECAM1    |
| SZ_Networks | Coexp_Module_midnightblue | 6774   | STAT3     |
| SZ_Networks | Coexp_Module_midnightblue | 182    | JAG1      |
| SZ_Networks | Coexp_Module_midnightblue | 11067  | C10orf10  |
| SZ_Networks | Coexp_Module_midnightblue | 84617  | TUBB6     |
| SZ_Networks | Coexp_Module_midnightblue | 8795   | TNFRSF10B |
| SZ_Networks | Coexp_Module_midnightblue | 4071   | TM4SF1    |
| SZ_Networks | Coexp_Module_midnightblue | 5873   | RAB27A    |
| SZ_Networks | Coexp_Module_midnightblue | 30844  | EHD4      |
| SZ_Networks | Coexp_Module_midnightblue | 3588   | IL10RB    |
| SZ_Networks | Coexp_Module_midnightblue | 302    | ANXA2     |
| SZ_Networks | Coexp_Module_midnightblue | 3119   | HLA-DQB1  |
| SZ_Networks | Coexp_Module_midnightblue | 4627   | MYH9      |
| SZ_Networks | Coexp_Module_midnightblue | 1284   | COL4A2    |

|                         |                           |        |          |
|-------------------------|---------------------------|--------|----------|
| SZ_Networks             | Coexp_Module_midnightblue | 1282   | COL4A1   |
| SZ_Networks             | Coexp_Module_midnightblue | 115207 | KCTD12   |
| SZ_Networks             | Coexp_Module_midnightblue | 8829   | NRP1     |
| SZ_Networks             | Coexp_Module_midnightblue | 23034  | SAMD4A   |
| SZ_Networks             | Coexp_Module_midnightblue | 221749 | PXDC1    |
| SZ_Networks             | Coexp_Module_midnightblue | 22898  | DENND3   |
| SZ_Networks             | Coexp_Module_midnightblue | 5771   | PTPN2    |
| SZ_Networks             | Coexp_Module_midnightblue | 7035   | TFPI     |
| SZ_Networks             | Coexp_Module_midnightblue | 9413   | FAM189A2 |
| SZ_Networks             | Coexp_Module_midnightblue | 2335   | FN1      |
| SZ_Networks             | Coexp_Module_midnightblue | 54918  | CMTM6    |
| SZ_Networks             | Coexp_Module_midnightblue | 116496 | FAM129A  |
| SZ_Networks             | Coexp_Module_midnightblue | 53827  | FXYD5    |
| SZ_Networks             | Coexp_Module_midnightblue | 55332  | DRAM1    |
| SZ_Networks             | Coexp_Module_midnightblue | 51279  | C1RL     |
| SZ_Networks             | Coexp_Module_midnightblue | 79651  | RHBDF2   |
| SZ_Networks             | Coexp_Module_midnightblue | 51365  | PLA1A    |
| SZ_Networks             | Coexp_Module_midnightblue | 9630   | GNA14    |
| SZ_Networks             | Coexp_Module_midnightblue | 83716  | CRISPLD2 |
| SZ_Networks             | Coexp_Module_midnightblue | 2004   | ELK3     |
| SZ_Networks             | Coexp_Module_midnightblue | 55616  | ASAP3    |
| SZ_Networks             | Coexp_Module_midnightblue | 58191  | CXCL16   |
| SZ_Networks             | Coexp_Module_midnightblue | 51435  | SCARA3   |
| SZ_Networks             | Coexp_Module_midnightblue | 23406  | COTL1    |
| SZ_Networks             | Coexp_Module_midnightblue | 7046   | TGFBR1   |
| SZ_Networks             | Coexp_Module_midnightblue | 196527 | ANO6     |
| SZ_Networks             | Coexp_Module_midnightblue | 152137 | CCDC50   |
| SZ_Networks             | Coexp_Module_midnightblue | 2120   | ETV6     |
| SZ_Networks             | Coexp_Module_midnightblue | 91107  | TRIM47   |
| SZ_Networks             | Coexp_Module_midnightblue | 768211 | RELL1    |
| SZ_Networks             | Coexp_Module_midnightblue | 83937  | RASSF4   |
| SZ_Networks             | Coexp_Module_midnightblue | 79993  | ELOVL7   |
| SZ_Networks             | Coexp_Module_midnightblue | 121457 | IKBIP    |
| SZ_Networks             | Coexp_Module_midnightblue | 3718   | JAK3     |
| SZ_Networks             | Coexp_Module_midnightblue | 54947  | LPCAT2   |
| SZ_Networks             | Coexp_Module_midnightblue | 140576 | S100A16  |
| SZ_Networks             | Coexp_Module_midnightblue | 155038 | GIMAP8   |
| Synapse_PPI_Communities | Syn-7_0_39                | 1915   | EEF1A1   |
| Synapse_PPI_Communities | Syn-7_0_39                | 6128   | RPL6     |
| Synapse_PPI_Communities | Syn-7_0_39                | 6124   | RPL4     |
| Synapse_PPI_Communities | Syn-7_0_39                | 1938   | EEF2     |
| Synapse_PPI_Communities | Syn-7_0_39                | 6217   | RPS16    |
| Synapse_PPI_Communities | Syn-7_0_39                | 55832  | CAND1    |
| Synapse_PPI_Communities | Syn-7_0_39                | 140801 | RPL10L   |
| Synapse_PPI_Communities | Syn-7_0_39                | 6189   | RPS3A    |
| Synapse_PPI_Communities | Syn-7_0_39                | 7534   | YWHAZ    |
| Synapse_PPI_Communities | Syn-7_0_39                | 4738   | NEDD8    |
| Synapse_PPI_Communities | Syn-7_0_39                | 6152   | RPL24    |
| Synapse_PPI_Communities | Syn-7_0_39                | 6137   | RPL13    |
| Synapse_PPI_Communities | Syn-7_0_39                | 6205   | RPS11    |
| Synapse_PPI_Communities | Syn-7_0_39                | 6138   | RPL15    |
| Synapse_PPI_Communities | Syn-7_0_39                | 6193   | RPS5     |
| Synapse_PPI_Communities | Syn-7_0_39                | 6134   | RPL10    |
| Synapse_PPI_Communities | Syn-7_0_39                | 6132   | RPL8     |
| Synapse_PPI_Communities | Syn-7_0_39                | 6223   | RPS19    |
| Synapse_PPI_Communities | Syn-7_0_39                | 6130   | RPL7A    |
| Synapse_PPI_Communities | Syn-7_0_39                | 6135   | RPL11    |
| Synapse_PPI_Communities | Syn-7_0_39                | 6129   | RPL7     |

|                         |            |        |         |
|-------------------------|------------|--------|---------|
| Synapse_PPI_Communities | Syn-7_0_39 | 6224   | RPS20   |
| Synapse_PPI_Communities | Syn-7_0_39 | 6136   | RPL12   |
| Synapse_PPI_Communities | Syn-7_0_39 | 6141   | RPL18   |
| Synapse_PPI_Communities | Syn-7_0_39 | 6160   | RPL31   |
| Synapse_PPI_Communities | Syn-7_0_39 | 6144   | RPL21   |
| Synapse_PPI_Communities | Syn-7_0_39 | 6187   | RPS2    |
| Synapse_PPI_Communities | Syn-7_0_39 | 6228   | RPS23   |
| Synapse_PPI_Communities | Syn-7_0_39 | 4736   | RPL10A  |
| Synapse_PPI_Communities | Syn-7_0_39 | 6191   | RPS4X   |
| Synapse_PPI_Communities | Syn-7_0_39 | 6202   | RPS8    |
| Synapse_PPI_Communities | Syn-7_0_39 | 6194   | RPS6    |
| Synapse_PPI_Communities | Syn-7_0_39 | 6147   | RPL23A  |
| Synapse_PPI_Communities | Syn-7_0_39 | 6125   | RPL5    |
| Synapse_PPI_Communities | Syn-7_0_39 | 6188   | RPS3    |
| Synapse_PPI_Communities | Syn-7_0_39 | 6613   | SUMO2   |
| Synapse_PPI_Communities | Syn-7_0_39 | 7341   | SUMO1   |
| Synapse_PPI_Communities | Syn-7_0_39 | 10987  | COP55   |
| Synapse_PPI_Communities | Syn-7_0_39 | 2335   | FN1     |
| Synapse_PPI_Communities | Syn-6_1_9  | 7534   | YWHAZ   |
| Synapse_PPI_Communities | Syn-6_1_9  | 7532   | YWHAG   |
| Synapse_PPI_Communities | Syn-6_1_9  | 7529   | YWHAB   |
| Synapse_PPI_Communities | Syn-6_1_9  | 7533   | YWHAH   |
| Synapse_PPI_Communities | Syn-6_1_9  | 9181   | ARHGEF2 |
| Synapse_PPI_Communities | Syn-6_1_9  | 7415   | VCP     |
| Synapse_PPI_Communities | Syn-6_1_9  | 2885   | GRB2    |
| Synapse_PPI_Communities | Syn-6_1_9  | 8452   | CUL3    |
| Synapse_PPI_Communities | Syn-6_1_9  | 2335   | FN1     |
| Synapse_PPI_Communities | Syn-6_0_85 | 1915   | EEF1A1  |
| Synapse_PPI_Communities | Syn-6_0_85 | 6128   | RPL6    |
| Synapse_PPI_Communities | Syn-6_0_85 | 6124   | RPL4    |
| Synapse_PPI_Communities | Syn-6_0_85 | 1938   | EEF2    |
| Synapse_PPI_Communities | Syn-6_0_85 | 6217   | RPS16   |
| Synapse_PPI_Communities | Syn-6_0_85 | 55832  | CAND1   |
| Synapse_PPI_Communities | Syn-6_0_85 | 140801 | RPL10L  |
| Synapse_PPI_Communities | Syn-6_0_85 | 6189   | RPS3A   |
| Synapse_PPI_Communities | Syn-6_0_85 | 7534   | YWHAZ   |
| Synapse_PPI_Communities | Syn-6_0_85 | 4738   | NEDD8   |
| Synapse_PPI_Communities | Syn-6_0_85 | 6152   | RPL24   |
| Synapse_PPI_Communities | Syn-6_0_85 | 6137   | RPL13   |
| Synapse_PPI_Communities | Syn-6_0_85 | 6205   | RPS11   |
| Synapse_PPI_Communities | Syn-6_0_85 | 6138   | RPL15   |
| Synapse_PPI_Communities | Syn-6_0_85 | 6193   | RPS5    |
| Synapse_PPI_Communities | Syn-6_0_85 | 6134   | RPL10   |
| Synapse_PPI_Communities | Syn-6_0_85 | 6132   | RPL8    |
| Synapse_PPI_Communities | Syn-6_0_85 | 6223   | RPS19   |
| Synapse_PPI_Communities | Syn-6_0_85 | 6130   | RPL7A   |
| Synapse_PPI_Communities | Syn-6_0_85 | 6135   | RPL11   |
| Synapse_PPI_Communities | Syn-6_0_85 | 6129   | RPL7    |
| Synapse_PPI_Communities | Syn-6_0_85 | 6224   | RPS20   |
| Synapse_PPI_Communities | Syn-6_0_85 | 6136   | RPL12   |
| Synapse_PPI_Communities | Syn-6_0_85 | 6141   | RPL18   |
| Synapse_PPI_Communities | Syn-6_0_85 | 6160   | RPL31   |
| Synapse_PPI_Communities | Syn-6_0_85 | 6144   | RPL21   |
| Synapse_PPI_Communities | Syn-6_0_85 | 6187   | RPS2    |
| Synapse_PPI_Communities | Syn-6_0_85 | 6228   | RPS23   |
| Synapse_PPI_Communities | Syn-6_0_85 | 4736   | RPL10A  |
| Synapse_PPI_Communities | Syn-6_0_85 | 6191   | RPS4X   |
| Synapse_PPI_Communities | Syn-6_0_85 | 6202   | RPS8    |

|                         |            |        |          |
|-------------------------|------------|--------|----------|
| Synapse_PPI_Communities | Syn-6_0_85 | 6194   | RPS6     |
| Synapse_PPI_Communities | Syn-6_0_85 | 6147   | RPL23A   |
| Synapse_PPI_Communities | Syn-6_0_85 | 6125   | RPL5     |
| Synapse_PPI_Communities | Syn-6_0_85 | 6188   | RPS3     |
| Synapse_PPI_Communities | Syn-6_0_85 | 6613   | SUMO2    |
| Synapse_PPI_Communities | Syn-6_0_85 | 7341   | SUMO1    |
| Synapse_PPI_Communities | Syn-6_0_85 | 10987  | COPS5    |
| Synapse_PPI_Communities | Syn-6_0_85 | 2335   | FN1      |
| Synapse_PPI_Communities | Syn-6_0_85 | 6218   | RPS17    |
| Synapse_PPI_Communities | Syn-6_0_85 | 6203   | RPS9     |
| Synapse_PPI_Communities | Syn-6_0_85 | 93185  | IGSF8    |
| Synapse_PPI_Communities | Syn-6_0_85 | 6155   | RPL27    |
| Synapse_PPI_Communities | Syn-6_0_85 | 6122   | RPL3     |
| Synapse_PPI_Communities | Syn-6_0_85 | 25873  | RPL36    |
| Synapse_PPI_Communities | Syn-6_0_85 | 6233   | RPS27A   |
| Synapse_PPI_Communities | Syn-6_0_85 | 6168   | RPL37A   |
| Synapse_PPI_Communities | Syn-6_0_85 | 292    | SLC25A5  |
| Synapse_PPI_Communities | Syn-6_0_85 | 6142   | RPL18A   |
| Synapse_PPI_Communities | Syn-6_0_85 | 6234   | RPS28    |
| Synapse_PPI_Communities | Syn-6_0_85 | 9045   | RPL14    |
| Synapse_PPI_Communities | Syn-6_0_85 | 3608   | ILF2     |
| Synapse_PPI_Communities | Syn-6_0_85 | 10528  | NOP56    |
| Synapse_PPI_Communities | Syn-6_0_85 | 6201   | RPS7     |
| Synapse_PPI_Communities | Syn-6_0_85 | 6230   | RPS25    |
| Synapse_PPI_Communities | Syn-6_0_85 | 6146   | RPL22    |
| Synapse_PPI_Communities | Syn-6_0_85 | 4691   | NCL      |
| Synapse_PPI_Communities | Syn-6_0_85 | 6139   | RPL17    |
| Synapse_PPI_Communities | Syn-6_0_85 | 6133   | RPL9     |
| Synapse_PPI_Communities | Syn-6_0_85 | 6159   | RPL29    |
| Synapse_PPI_Communities | Syn-6_0_85 | 6156   | RPL30    |
| Synapse_PPI_Communities | Syn-6_0_85 | 6229   | RPS24    |
| Synapse_PPI_Communities | Syn-6_0_85 | 6207   | RPS13    |
| Synapse_PPI_Communities | Syn-6_0_85 | 9349   | RPL23    |
| Synapse_PPI_Communities | Syn-6_0_85 | 220717 | RPLPOP6  |
| Synapse_PPI_Communities | Syn-6_0_85 | 6143   | RPL19    |
| Synapse_PPI_Communities | Syn-6_0_85 | 6176   | RPLP1    |
| Synapse_PPI_Communities | Syn-6_0_85 | 6175   | RPLP0    |
| Synapse_PPI_Communities | Syn-6_0_85 | 3609   | ILF3     |
| Synapse_PPI_Communities | Syn-6_0_85 | 3320   | HSP90AA1 |
| Synapse_PPI_Communities | Syn-6_0_85 | 6210   | RPS15A   |
| Synapse_PPI_Communities | Syn-6_0_85 | 6045   | RNF2     |
| Synapse_PPI_Communities | Syn-6_0_85 | 26270  | FBXO6    |
| Synapse_PPI_Communities | Syn-6_0_85 | 1017   | CDK2     |
| Synapse_PPI_Communities | Syn-6_0_85 | 8266   | UBL4A    |
| Synapse_PPI_Communities | Syn-6_0_85 | 8452   | CUL3     |
| Synapse_PPI_Communities | Syn-6_0_85 | 8454   | CUL1     |
| Synapse_PPI_Communities | Syn-6_0_85 | 8065   | CUL5     |
| Synapse_PPI_Communities | Syn-6_0_85 | 409    | ARRB2    |
| Synapse_PPI_Communities | Syn-6_0_85 | 23435  | TARDBP   |
| Synapse_PPI_Communities | Syn-6_0_85 | 3921   | RPSA     |
| Synapse_PPI_Communities | Syn-6_0_85 | 6780   | STAU1    |
| Synapse_PPI_Communities | Syn-6_0_85 | 8453   | CUL2     |
| Synapse_PPI_Communities | Syn-6_0_85 | 7316   | UBC      |
| Synapse_PPI_Communities | Syn-6_0_85 | 975    | CD81     |
| Synapse_PPI_Communities | Syn-5_9_5  | 7534   | YWHAZ    |
| Synapse_PPI_Communities | Syn-5_9_5  | 7532   | YWHAG    |
| Synapse_PPI_Communities | Syn-5_9_5  | 3799   | KIF5B    |
| Synapse_PPI_Communities | Syn-5_9_5  | 7529   | YWHAB    |

|                         |             |        |          |
|-------------------------|-------------|--------|----------|
| Synapse_PPI_Communities | Syn-5_9_5   | 89953  | KLC4     |
| Synapse_PPI_Communities | Syn-5_8_9   | 529    | ATP6V1E1 |
| Synapse_PPI_Communities | Syn-5_8_9   | 525    | ATP6V1B1 |
| Synapse_PPI_Communities | Syn-5_8_9   | 7316   | UBC      |
| Synapse_PPI_Communities | Syn-5_8_9   | 535    | ATP6V0A1 |
| Synapse_PPI_Communities | Syn-5_8_9   | 51382  | ATP6V1D  |
| Synapse_PPI_Communities | Syn-5_8_9   | 526    | ATP6V1B2 |
| Synapse_PPI_Communities | Syn-5_8_9   | 9296   | ATP6V1F  |
| Synapse_PPI_Communities | Syn-5_8_9   | 51606  | ATP6V1H  |
| Synapse_PPI_Communities | Syn-5_8_9   | 64924  | SLC30A5  |
| Synapse_PPI_Communities | Syn-5_0_187 | 1915   | EEF1A1   |
| Synapse_PPI_Communities | Syn-5_0_187 | 6128   | RPL6     |
| Synapse_PPI_Communities | Syn-5_0_187 | 6124   | RPL4     |
| Synapse_PPI_Communities | Syn-5_0_187 | 1938   | EEF2     |
| Synapse_PPI_Communities | Syn-5_0_187 | 6217   | RPS16    |
| Synapse_PPI_Communities | Syn-5_0_187 | 55832  | CAND1    |
| Synapse_PPI_Communities | Syn-5_0_187 | 140801 | RPL10L   |
| Synapse_PPI_Communities | Syn-5_0_187 | 6189   | RPS3A    |
| Synapse_PPI_Communities | Syn-5_0_187 | 7534   | YWHAZ    |
| Synapse_PPI_Communities | Syn-5_0_187 | 4738   | NEDD8    |
| Synapse_PPI_Communities | Syn-5_0_187 | 6152   | RPL24    |
| Synapse_PPI_Communities | Syn-5_0_187 | 6137   | RPL13    |
| Synapse_PPI_Communities | Syn-5_0_187 | 6205   | RPS11    |
| Synapse_PPI_Communities | Syn-5_0_187 | 6138   | RPL15    |
| Synapse_PPI_Communities | Syn-5_0_187 | 6193   | RPS5     |
| Synapse_PPI_Communities | Syn-5_0_187 | 6134   | RPL10    |
| Synapse_PPI_Communities | Syn-5_0_187 | 6132   | RPL8     |
| Synapse_PPI_Communities | Syn-5_0_187 | 6223   | RPS19    |
| Synapse_PPI_Communities | Syn-5_0_187 | 6130   | RPL7A    |
| Synapse_PPI_Communities | Syn-5_0_187 | 6135   | RPL11    |
| Synapse_PPI_Communities | Syn-5_0_187 | 6129   | RPL7     |
| Synapse_PPI_Communities | Syn-5_0_187 | 6224   | RPS20    |
| Synapse_PPI_Communities | Syn-5_0_187 | 6136   | RPL12    |
| Synapse_PPI_Communities | Syn-5_0_187 | 6141   | RPL18    |
| Synapse_PPI_Communities | Syn-5_0_187 | 6160   | RPL31    |
| Synapse_PPI_Communities | Syn-5_0_187 | 6144   | RPL21    |
| Synapse_PPI_Communities | Syn-5_0_187 | 6187   | RPS2     |
| Synapse_PPI_Communities | Syn-5_0_187 | 6228   | RPS23    |
| Synapse_PPI_Communities | Syn-5_0_187 | 4736   | RPL10A   |
| Synapse_PPI_Communities | Syn-5_0_187 | 6191   | RPS4X    |
| Synapse_PPI_Communities | Syn-5_0_187 | 6202   | RPS8     |
| Synapse_PPI_Communities | Syn-5_0_187 | 6194   | RPS6     |
| Synapse_PPI_Communities | Syn-5_0_187 | 6147   | RPL23A   |
| Synapse_PPI_Communities | Syn-5_0_187 | 6125   | RPL5     |
| Synapse_PPI_Communities | Syn-5_0_187 | 6188   | RPS3     |
| Synapse_PPI_Communities | Syn-5_0_187 | 6613   | SUMO2    |
| Synapse_PPI_Communities | Syn-5_0_187 | 7341   | SUMO1    |
| Synapse_PPI_Communities | Syn-5_0_187 | 10987  | COPS5    |
| Synapse_PPI_Communities | Syn-5_0_187 | 2335   | FN1      |
| Synapse_PPI_Communities | Syn-5_0_187 | 6218   | RPS17    |
| Synapse_PPI_Communities | Syn-5_0_187 | 6203   | RPS9     |
| Synapse_PPI_Communities | Syn-5_0_187 | 93185  | IGSF8    |
| Synapse_PPI_Communities | Syn-5_0_187 | 6155   | RPL27    |
| Synapse_PPI_Communities | Syn-5_0_187 | 6122   | RPL3     |
| Synapse_PPI_Communities | Syn-5_0_187 | 25873  | RPL36    |
| Synapse_PPI_Communities | Syn-5_0_187 | 6233   | RPS27A   |
| Synapse_PPI_Communities | Syn-5_0_187 | 6168   | RPL37A   |
| Synapse_PPI_Communities | Syn-5_0_187 | 292    | SLC25A5  |

|                         |             |        |          |
|-------------------------|-------------|--------|----------|
| Synapse_PPI_Communities | Syn-5_0_187 | 6142   | RPL18A   |
| Synapse_PPI_Communities | Syn-5_0_187 | 7532   | YWHAG    |
| Synapse_PPI_Communities | Syn-5_0_187 | 7529   | YWHAB    |
| Synapse_PPI_Communities | Syn-5_0_187 | 7533   | YWHAH    |
| Synapse_PPI_Communities | Syn-5_0_187 | 9181   | ARHGEF2  |
| Synapse_PPI_Communities | Syn-5_0_187 | 7415   | VCP      |
| Synapse_PPI_Communities | Syn-5_0_187 | 6234   | RPS28    |
| Synapse_PPI_Communities | Syn-5_0_187 | 9045   | RPL14    |
| Synapse_PPI_Communities | Syn-5_0_187 | 3608   | ILF2     |
| Synapse_PPI_Communities | Syn-5_0_187 | 10528  | NOP56    |
| Synapse_PPI_Communities | Syn-5_0_187 | 6201   | RPS7     |
| Synapse_PPI_Communities | Syn-5_0_187 | 6230   | RPS25    |
| Synapse_PPI_Communities | Syn-5_0_187 | 6146   | RPL22    |
| Synapse_PPI_Communities | Syn-5_0_187 | 4691   | NCL      |
| Synapse_PPI_Communities | Syn-5_0_187 | 6139   | RPL17    |
| Synapse_PPI_Communities | Syn-5_0_187 | 6133   | RPL9     |
| Synapse_PPI_Communities | Syn-5_0_187 | 6159   | RPL29    |
| Synapse_PPI_Communities | Syn-5_0_187 | 6156   | RPL30    |
| Synapse_PPI_Communities | Syn-5_0_187 | 6229   | RPS24    |
| Synapse_PPI_Communities | Syn-5_0_187 | 6207   | RPS13    |
| Synapse_PPI_Communities | Syn-5_0_187 | 9349   | RPL23    |
| Synapse_PPI_Communities | Syn-5_0_187 | 220717 | RPLPOP6  |
| Synapse_PPI_Communities | Syn-5_0_187 | 6143   | RPL19    |
| Synapse_PPI_Communities | Syn-5_0_187 | 6176   | RPLP1    |
| Synapse_PPI_Communities | Syn-5_0_187 | 6175   | RPLP0    |
| Synapse_PPI_Communities | Syn-5_0_187 | 3609   | ILF3     |
| Synapse_PPI_Communities | Syn-5_0_187 | 3320   | HSP90AA1 |
| Synapse_PPI_Communities | Syn-5_0_187 | 6210   | RPS15A   |
| Synapse_PPI_Communities | Syn-5_0_187 | 2885   | GRB2     |
| Synapse_PPI_Communities | Syn-5_0_187 | 8452   | CUL3     |
| Synapse_PPI_Communities | Syn-5_0_187 | 6045   | RNF2     |
| Synapse_PPI_Communities | Syn-5_0_187 | 10971  | YWHAQ    |
| Synapse_PPI_Communities | Syn-5_0_187 | 2597   | GAPDH    |
| Synapse_PPI_Communities | Syn-5_0_187 | 203068 | TUBB     |
| Synapse_PPI_Communities | Syn-5_0_187 | 26270  | FBXO6    |
| Synapse_PPI_Communities | Syn-5_0_187 | 1017   | CDK2     |
| Synapse_PPI_Communities | Syn-5_0_187 | 3312   | HSPA8    |
| Synapse_PPI_Communities | Syn-5_0_187 | 8266   | UBL4A    |
| Synapse_PPI_Communities | Syn-5_0_187 | 8454   | CUL1     |
| Synapse_PPI_Communities | Syn-5_0_187 | 8065   | CUL5     |
| Synapse_PPI_Communities | Syn-5_0_187 | 409    | ARRB2    |
| Synapse_PPI_Communities | Syn-5_0_187 | 23435  | TARDBP   |
| Synapse_PPI_Communities | Syn-5_0_187 | 3921   | RPSA     |
| Synapse_PPI_Communities | Syn-5_0_187 | 6780   | STAU1    |
| Synapse_PPI_Communities | Syn-5_0_187 | 8453   | CUL2     |
| Synapse_PPI_Communities | Syn-5_0_187 | 7316   | UBC      |
| Synapse_PPI_Communities | Syn-5_0_187 | 975    | CD81     |
| Synapse_PPI_Communities | Syn-5_0_187 | 6222   | RPS18    |
| Synapse_PPI_Communities | Syn-5_0_187 | 55720  | TSR1     |
| Synapse_PPI_Communities | Syn-5_0_187 | 51065  | RPS27L   |
| Synapse_PPI_Communities | Syn-5_0_187 | 65220  | NADK     |
| Synapse_PPI_Communities | Syn-5_0_187 | 501    | ALDH7A1  |
| Synapse_PPI_Communities | Syn-5_0_187 | 26999  | CYFIP2   |
| Synapse_PPI_Communities | Syn-5_0_187 | 9493   | KIF23    |
| Synapse_PPI_Communities | Syn-5_0_187 | 51602  | NOP58    |
| Synapse_PPI_Communities | Syn-5_0_187 | 11224  | RPL35    |
| Synapse_PPI_Communities | Syn-5_0_187 | 7979   | SHFM1    |
| Synapse_PPI_Communities | Syn-5_0_187 | 10514  | MYBBP1A  |



|                         |             |       |         |
|-------------------------|-------------|-------|---------|
| Synapse_PPI_Communities | Syn-5_0_187 | 9770  | RASSF2  |
| Synapse_PPI_Communities | Syn-5_0_187 | 7846  | TUBA1A  |
| Synapse_PPI_Communities | Syn-5_0_187 | 27430 | MAT2B   |
| Synapse_PPI_Communities | Syn-5_0_187 | 3646  | EIF3E   |
| Synapse_PPI_Communities | Syn-5_0_187 | 85440 | DOCK7   |
| Synapse_PPI_Communities | Syn-5_0_187 | 27044 | SND1    |
| Synapse_PPI_Communities | Syn-5_0_187 | 5127  | CDK16   |
| Synapse_PPI_Communities | Syn-5_0_187 | 369   | ARAF    |
| Synapse_PPI_Communities | Syn-5_0_187 | 65125 | WNK1    |
| Synapse_PPI_Communities | Syn-5_0_187 | 6232  | RPS27   |
| Synapse_PPI_Communities | Syn-5_0_187 | 9101  | USP8    |
| Synapse_PPI_Communities | Syn-5_0_187 | 8661  | EIF3A   |
| Synapse_PPI_Communities | Syn-5_0_187 | 6208  | RPS14   |
| Synapse_PPI_Communities | Syn-5_0_187 | 23327 | NEDD4L  |
| Synapse_PPI_Communities | Syn-5_0_187 | 6209  | RPS15   |
| Synapse_PPI_Communities | Syn-5_0_187 | 4486  | MST1R   |
| Synapse_PPI_Communities | Syn-5_0_187 | 10133 | OPTN    |
| Synapse_PPI_Communities | Syn-5_0_187 | 10238 | DCAF7   |
| Synapse_PPI_Communities | Syn-5_0_187 | 6157  | RPL27A  |
| Synapse_PPI_Communities | Syn-5_0_187 | 2539  | G6PD    |
| Synapse_PPI_Communities | Syn-5_0_187 | 6927  | HNF1A   |
| Synapse_PPI_Communities | Syn-5_0_187 | 6231  | RPS26   |
| Synapse_PPI_Communities | Syn-5_0_187 | 4670  | HNRNPM  |
| Synapse_PPI_Communities | Syn-5_0_187 | 7531  | YWHAE   |
| Synapse_PPI_Communities | Syn-5_0_187 | 351   | APP     |
| Synapse_PPI_Communities | Syn-5_0_187 | 6227  | RPS21   |
| Synapse_PPI_Communities | Syn-5_0_187 | 5747  | PTK2    |
| Synapse_PPI_Communities | Syn-5_0_187 | 23367 | LARP1   |
| Synapse_PPI_Communities | Syn-5_0_187 | 1029  | CDKN2A  |
| Synapse_PPI_Communities | Syn-5_0_187 | 3303  | HSPA1A  |
| Synapse_PPI_Communities | Syn-5_0_187 | 5062  | PAK2    |
| Synapse_PPI_Communities | Syn-5_0_187 | 4904  | YBX1    |
| Synapse_PPI_Communities | Syn-5_0_187 | 3313  | HSPA9   |
| Synapse_PPI_Communities | Syn-5_0_187 | 5580  | PRKCD   |
| Synapse_PPI_Communities | Syn-5_0_187 | 10014 | HDAC5   |
| Synapse_PPI_Communities | Syn-5_0_187 | 10399 | GNB2L1  |
| Synapse_PPI_Communities | Syn-5_0_187 | 7414  | VCL     |
| Synapse_PPI_Communities | Syn-5_0_187 | 26986 | PABPC1  |
| Synapse_PPI_Communities | Syn-5_0_187 | 3309  | HSPA5   |
| Synapse_PPI_Communities | Syn-5_0_187 | 80086 | TUBA4B  |
| Synapse_PPI_Communities | Syn-5_0_187 | 1173  | AP2M1   |
| Synapse_PPI_Communities | Syn-5_0_187 | 84790 | TUBA1C  |
| Synapse_PPI_Communities | Syn-5_0_187 | 25    | ABL1    |
| Synapse_PPI_Communities | Syn-5_0_187 | 3383  | ICAM1   |
| Synapse_PPI_Communities | Syn-5_0_187 | 2932  | GSK3B   |
| Synapse_PPI_Communities | Syn-5_0_187 | 6622  | SNCA    |
| Synapse_PPI_Communities | Syn-5_0_187 | 5598  | MAPK7   |
| Synapse_PPI_Communities | Syn-5_0_187 | 6711  | SPTBN1  |
| Synapse_PPI_Communities | Syn-5_0_187 | 6709  | SPTAN1  |
| Synapse_PPI_Communities | Syn-5_0_187 | 867   | CBL     |
| Synapse_PPI_Communities | Syn-5_0_187 | 9531  | BAG3    |
| Synapse_PPI_Communities | Syn-5_0_187 | 4627  | MYH9    |
| Synapse_PPI_Communities | Syn-5_0_187 | 84959 | UBASH3B |
| Synapse_PPI_Communities | Syn-5_0_187 | 9657  | IQCB1   |
| Synapse_PPI_Communities | Syn-5_0_187 | 1994  | ELAVL1  |
| Synapse_PPI_Communities | Syn-5_0_187 | 408   | ARRB1   |
| Synapse_PPI_Communities | Syn-5_0_187 | 2099  | ESR1    |
| Synapse_PPI_Communities | Syn-5_0_187 | 9924  | PAN2    |

|                         |             |       |          |
|-------------------------|-------------|-------|----------|
| Synapse_PPI_Communities | Syn-5_0_187 | 54165 | DCUN1D1  |
| Synapse_PPI_Communities | Syn-5_0_187 | 1457  | CSNK2A1  |
| Synapse_PPI_Communities | Syn-5_0_187 | 9775  | EIF4A3   |
| Synapse_PPI_Communities | Syn-5_0_187 | 6464  | SHC1     |
| Synapse_PPI_Communities | Syn-5_0_187 | 1386  | ATF2     |
| Synapse_PPI_Communities | Syn-5_0_187 | 10537 | UBD      |
| Synapse_PPI_Communities | Syn-5_0_187 | 5052  | PRDX1    |
| Synapse_PPI_Communities | Syn-5_0_187 | 10576 | CCT2     |
| Synapse_PPI_Communities | Syn-5_0_187 | 5684  | PSMA3    |
| Synapse_PPI_Communities | Syn-5_0_187 | 5518  | PPP2R1A  |
| Synapse_PPI_Communities | Syn-5_0_187 | 4193  | MDM2     |
| Synapse_PPI_Communities | Syn-5_0_187 | 302   | ANXA2    |
| Synapse_PPI_Communities | Syn-5_0_187 | 5071  | PARK2    |
| Synapse_PPI_Communities | Syn-5_0_187 | 7412  | VCAM1    |
| Synapse_PPI_Communities | Syn-5_0_187 | 3326  | HSP90AB1 |
| Synapse_PPI_Communities | Syn-5_0_187 | 51547 | SIRT7    |
| Synapse_PPI_Communities | Syn-5_0_187 | 8450  | CUL4B    |
| Synapse_PPI_Communities | Syn-5_0_187 | 4869  | NPM1     |
| Synapse_PPI_Communities | Syn-5_0_187 | 3676  | ITGA4    |
| Synapse_PPI_Communities | Syn-5_0_187 | 154   | ADRB2    |
| Synapse_PPI_Communities | Syn-5_0_187 | 57154 | SMURF1   |
| Synapse_PPI_Communities | Syn-5_0_187 | 2023  | ENO1     |
| Synapse_PPI_Communities | Syn-5_0_187 | 1956  | EGFR     |
| Synapse_PPI_Communities | Syn-4_9_13  | 4905  | NSF      |
| Synapse_PPI_Communities | Syn-4_9_13  | 8417  | STX7     |
| Synapse_PPI_Communities | Syn-4_9_13  | 10228 | STX6     |
| Synapse_PPI_Communities | Syn-4_9_13  | 7316  | UBC      |
| Synapse_PPI_Communities | Syn-4_9_13  | 8773  | SNAP23   |
| Synapse_PPI_Communities | Syn-4_9_13  | 8775  | NAPA     |
| Synapse_PPI_Communities | Syn-4_9_13  | 6811  | STX5     |
| Synapse_PPI_Communities | Syn-4_9_13  | 6616  | SNAP25   |
| Synapse_PPI_Communities | Syn-4_9_13  | 6810  | STX4     |
| Synapse_PPI_Communities | Syn-4_9_13  | 9342  | SNAP29   |
| Synapse_PPI_Communities | Syn-4_9_13  | 6845  | VAMP7    |
| Synapse_PPI_Communities | Syn-4_9_13  | 23673 | STX12    |
| Synapse_PPI_Communities | Syn-4_9_13  | 4899  | NRF1     |
| Synapse_PPI_Communities | Syn-4_32_5  | 161   | AP2A2    |
| Synapse_PPI_Communities | Syn-4_32_5  | 160   | AP2A1    |
| Synapse_PPI_Communities | Syn-4_32_5  | 273   | AMPH     |
| Synapse_PPI_Communities | Syn-4_32_5  | 274   | BIN1     |
| Synapse_PPI_Communities | Syn-4_32_5  | 7316  | UBC      |
| Synapse_PPI_Communities | Syn-4_3_16  | 529   | ATP6V1E1 |
| Synapse_PPI_Communities | Syn-4_3_16  | 525   | ATP6V1B1 |
| Synapse_PPI_Communities | Syn-4_3_16  | 7316  | UBC      |
| Synapse_PPI_Communities | Syn-4_3_16  | 535   | ATP6V0A1 |
| Synapse_PPI_Communities | Syn-4_3_16  | 51382 | ATP6V1D  |
| Synapse_PPI_Communities | Syn-4_3_16  | 526   | ATP6V1B2 |
| Synapse_PPI_Communities | Syn-4_3_16  | 9296  | ATP6V1F  |
| Synapse_PPI_Communities | Syn-4_3_16  | 51606 | ATP6V1H  |
| Synapse_PPI_Communities | Syn-4_3_16  | 64924 | SLC30A5  |
| Synapse_PPI_Communities | Syn-4_3_16  | 10312 | TCIRG1   |
| Synapse_PPI_Communities | Syn-4_3_16  | 528   | ATP6V1C1 |
| Synapse_PPI_Communities | Syn-4_3_16  | 6222  | RPS18    |
| Synapse_PPI_Communities | Syn-4_3_16  | 6209  | RPS15    |
| Synapse_PPI_Communities | Syn-4_3_16  | 6844  | VAMP2    |
| Synapse_PPI_Communities | Syn-4_3_16  | 1244  | ABCC2    |
| Synapse_PPI_Communities | Syn-4_3_16  | 8301  | PICALM   |
| Synapse_PPI_Communities | Syn-4_23_10 | 51678 | MPP6     |

|                         |             |        |         |
|-------------------------|-------------|--------|---------|
| Synapse_PPI_Communities | Syn-4_23_10 | 3768   | KCNJ12  |
| Synapse_PPI_Communities | Syn-4_23_10 | 8825   | LIN7A   |
| Synapse_PPI_Communities | Syn-4_23_10 | 7316   | UBC     |
| Synapse_PPI_Communities | Syn-4_23_10 | 1742   | DLG4    |
| Synapse_PPI_Communities | Syn-4_23_10 | 1740   | DLG2    |
| Synapse_PPI_Communities | Syn-4_23_10 | 2977   | GUCY1A2 |
| Synapse_PPI_Communities | Syn-4_23_10 | 140735 | DYNLL2  |
| Synapse_PPI_Communities | Syn-4_23_10 | 8655   | DYNLL1  |
| Synapse_PPI_Communities | Syn-4_23_10 | 4130   | MAP1A   |
| Synapse_PPI_Communities | Syn-4_0_509 | 1915   | EEF1A1  |
| Synapse_PPI_Communities | Syn-4_0_509 | 6128   | RPL6    |
| Synapse_PPI_Communities | Syn-4_0_509 | 6124   | RPL4    |
| Synapse_PPI_Communities | Syn-4_0_509 | 1938   | EEF2    |
| Synapse_PPI_Communities | Syn-4_0_509 | 6217   | RPS16   |
| Synapse_PPI_Communities | Syn-4_0_509 | 55832  | CAND1   |
| Synapse_PPI_Communities | Syn-4_0_509 | 140801 | RPL10L  |
| Synapse_PPI_Communities | Syn-4_0_509 | 6189   | RPS3A   |
| Synapse_PPI_Communities | Syn-4_0_509 | 7534   | YWHAZ   |
| Synapse_PPI_Communities | Syn-4_0_509 | 4738   | NEDD8   |
| Synapse_PPI_Communities | Syn-4_0_509 | 6152   | RPL24   |
| Synapse_PPI_Communities | Syn-4_0_509 | 6137   | RPL13   |
| Synapse_PPI_Communities | Syn-4_0_509 | 6205   | RPS11   |
| Synapse_PPI_Communities | Syn-4_0_509 | 6138   | RPL15   |
| Synapse_PPI_Communities | Syn-4_0_509 | 6193   | RPS5    |
| Synapse_PPI_Communities | Syn-4_0_509 | 6134   | RPL10   |
| Synapse_PPI_Communities | Syn-4_0_509 | 6132   | RPL8    |
| Synapse_PPI_Communities | Syn-4_0_509 | 6223   | RPS19   |
| Synapse_PPI_Communities | Syn-4_0_509 | 6130   | RPL7A   |
| Synapse_PPI_Communities | Syn-4_0_509 | 6135   | RPL11   |
| Synapse_PPI_Communities | Syn-4_0_509 | 6129   | RPL7    |
| Synapse_PPI_Communities | Syn-4_0_509 | 6224   | RPS20   |
| Synapse_PPI_Communities | Syn-4_0_509 | 6136   | RPL12   |
| Synapse_PPI_Communities | Syn-4_0_509 | 6141   | RPL18   |
| Synapse_PPI_Communities | Syn-4_0_509 | 6160   | RPL31   |
| Synapse_PPI_Communities | Syn-4_0_509 | 6144   | RPL21   |
| Synapse_PPI_Communities | Syn-4_0_509 | 6187   | RPS2    |
| Synapse_PPI_Communities | Syn-4_0_509 | 6228   | RPS23   |
| Synapse_PPI_Communities | Syn-4_0_509 | 4736   | RPL10A  |
| Synapse_PPI_Communities | Syn-4_0_509 | 6191   | RPS4X   |
| Synapse_PPI_Communities | Syn-4_0_509 | 6202   | RPS8    |
| Synapse_PPI_Communities | Syn-4_0_509 | 6194   | RPS6    |
| Synapse_PPI_Communities | Syn-4_0_509 | 6147   | RPL23A  |
| Synapse_PPI_Communities | Syn-4_0_509 | 6125   | RPL5    |
| Synapse_PPI_Communities | Syn-4_0_509 | 6188   | RPS3    |
| Synapse_PPI_Communities | Syn-4_0_509 | 6613   | SUMO2   |
| Synapse_PPI_Communities | Syn-4_0_509 | 7341   | SUMO1   |
| Synapse_PPI_Communities | Syn-4_0_509 | 10987  | COPS5   |
| Synapse_PPI_Communities | Syn-4_0_509 | 2335   | FN1     |
| Synapse_PPI_Communities | Syn-4_0_509 | 6218   | RPS17   |
| Synapse_PPI_Communities | Syn-4_0_509 | 6203   | RPS9    |
| Synapse_PPI_Communities | Syn-4_0_509 | 93185  | IGSF8   |
| Synapse_PPI_Communities | Syn-4_0_509 | 6155   | RPL27   |
| Synapse_PPI_Communities | Syn-4_0_509 | 6122   | RPL3    |
| Synapse_PPI_Communities | Syn-4_0_509 | 25873  | RPL36   |
| Synapse_PPI_Communities | Syn-4_0_509 | 6233   | RPS27A  |
| Synapse_PPI_Communities | Syn-4_0_509 | 6168   | RPL37A  |
| Synapse_PPI_Communities | Syn-4_0_509 | 292    | SLC25A5 |
| Synapse_PPI_Communities | Syn-4_0_509 | 6142   | RPL18A  |

|                         |             |        |          |
|-------------------------|-------------|--------|----------|
| Synapse_PPI_Communities | Syn-4_0_509 | 7532   | YWHAG    |
| Synapse_PPI_Communities | Syn-4_0_509 | 7529   | YWHAB    |
| Synapse_PPI_Communities | Syn-4_0_509 | 7533   | YWHAH    |
| Synapse_PPI_Communities | Syn-4_0_509 | 9181   | ARHGEF2  |
| Synapse_PPI_Communities | Syn-4_0_509 | 7415   | VCP      |
| Synapse_PPI_Communities | Syn-4_0_509 | 6234   | RPS28    |
| Synapse_PPI_Communities | Syn-4_0_509 | 9045   | RPL14    |
| Synapse_PPI_Communities | Syn-4_0_509 | 3608   | ILF2     |
| Synapse_PPI_Communities | Syn-4_0_509 | 10528  | NOP56    |
| Synapse_PPI_Communities | Syn-4_0_509 | 6201   | RPS7     |
| Synapse_PPI_Communities | Syn-4_0_509 | 6230   | RPS25    |
| Synapse_PPI_Communities | Syn-4_0_509 | 6146   | RPL22    |
| Synapse_PPI_Communities | Syn-4_0_509 | 4691   | NCL      |
| Synapse_PPI_Communities | Syn-4_0_509 | 6139   | RPL17    |
| Synapse_PPI_Communities | Syn-4_0_509 | 6133   | RPL9     |
| Synapse_PPI_Communities | Syn-4_0_509 | 6159   | RPL29    |
| Synapse_PPI_Communities | Syn-4_0_509 | 6156   | RPL30    |
| Synapse_PPI_Communities | Syn-4_0_509 | 6229   | RPS24    |
| Synapse_PPI_Communities | Syn-4_0_509 | 6207   | RPS13    |
| Synapse_PPI_Communities | Syn-4_0_509 | 9349   | RPL23    |
| Synapse_PPI_Communities | Syn-4_0_509 | 220717 | RPLPOP6  |
| Synapse_PPI_Communities | Syn-4_0_509 | 6143   | RPL19    |
| Synapse_PPI_Communities | Syn-4_0_509 | 7203   | CCT3     |
| Synapse_PPI_Communities | Syn-4_0_509 | 10574  | CCT7     |
| Synapse_PPI_Communities | Syn-4_0_509 | 5516   | PPP2CB   |
| Synapse_PPI_Communities | Syn-4_0_509 | 10694  | CCT8     |
| Synapse_PPI_Communities | Syn-4_0_509 | 10014  | HDAC5    |
| Synapse_PPI_Communities | Syn-4_0_509 | 10575  | CCT4     |
| Synapse_PPI_Communities | Syn-4_0_509 | 6950   | TCP1     |
| Synapse_PPI_Communities | Syn-4_0_509 | 3676   | ITGA4    |
| Synapse_PPI_Communities | Syn-4_0_509 | 6176   | RPLP1    |
| Synapse_PPI_Communities | Syn-4_0_509 | 6175   | RPLP0    |
| Synapse_PPI_Communities | Syn-4_0_509 | 3609   | ILF3     |
| Synapse_PPI_Communities | Syn-4_0_509 | 3320   | HSP90AA1 |
| Synapse_PPI_Communities | Syn-4_0_509 | 6210   | RPS15A   |
| Synapse_PPI_Communities | Syn-4_0_509 | 2885   | GRB2     |
| Synapse_PPI_Communities | Syn-4_0_509 | 8452   | CUL3     |
| Synapse_PPI_Communities | Syn-4_0_509 | 6045   | RNF2     |
| Synapse_PPI_Communities | Syn-4_0_509 | 10971  | YWHAQ    |
| Synapse_PPI_Communities | Syn-4_0_509 | 2597   | GAPDH    |
| Synapse_PPI_Communities | Syn-4_0_509 | 203068 | TUBB     |
| Synapse_PPI_Communities | Syn-4_0_509 | 26270  | FBXO6    |
| Synapse_PPI_Communities | Syn-4_0_509 | 1017   | CDK2     |
| Synapse_PPI_Communities | Syn-4_0_509 | 3312   | HSPA8    |
| Synapse_PPI_Communities | Syn-4_0_509 | 8266   | UBL4A    |
| Synapse_PPI_Communities | Syn-4_0_509 | 8454   | CUL1     |
| Synapse_PPI_Communities | Syn-4_0_509 | 8065   | CUL5     |
| Synapse_PPI_Communities | Syn-4_0_509 | 409    | ARRB2    |
| Synapse_PPI_Communities | Syn-4_0_509 | 23435  | TARDBP   |
| Synapse_PPI_Communities | Syn-4_0_509 | 3921   | RPSA     |
| Synapse_PPI_Communities | Syn-4_0_509 | 6780   | STAU1    |
| Synapse_PPI_Communities | Syn-4_0_509 | 8453   | CUL2     |
| Synapse_PPI_Communities | Syn-4_0_509 | 7316   | UBC      |
| Synapse_PPI_Communities | Syn-4_0_509 | 975    | CD81     |
| Synapse_PPI_Communities | Syn-4_0_509 | 6222   | RPS18    |
| Synapse_PPI_Communities | Syn-4_0_509 | 55720  | TSR1     |
| Synapse_PPI_Communities | Syn-4_0_509 | 51065  | RPS27L   |
| Synapse_PPI_Communities | Syn-4_0_509 | 65220  | NADK     |

|                         |             |       |         |
|-------------------------|-------------|-------|---------|
| Synapse_PPI_Communities | Syn-4_0_509 | 501   | ALDH7A1 |
| Synapse_PPI_Communities | Syn-4_0_509 | 26999 | CYFIP2  |
| Synapse_PPI_Communities | Syn-4_0_509 | 9493  | KIF23   |
| Synapse_PPI_Communities | Syn-4_0_509 | 811   | CALR    |
| Synapse_PPI_Communities | Syn-4_0_509 | 7184  | HSP90B1 |
| Synapse_PPI_Communities | Syn-4_0_509 | 5034  | P4HB    |
| Synapse_PPI_Communities | Syn-4_0_509 | 23193 | GANAB   |
| Synapse_PPI_Communities | Syn-4_0_509 | 5589  | PRKCSH  |
| Synapse_PPI_Communities | Syn-4_0_509 | 51602 | NOP58   |
| Synapse_PPI_Communities | Syn-4_0_509 | 11224 | RPL35   |
| Synapse_PPI_Communities | Syn-4_0_509 | 7979  | SHFM1   |
| Synapse_PPI_Communities | Syn-4_0_509 | 10514 | MYBBP1A |
| Synapse_PPI_Communities | Syn-4_0_509 | 9770  | RASSF2  |
| Synapse_PPI_Communities | Syn-4_0_509 | 7846  | TUBA1A  |
| Synapse_PPI_Communities | Syn-4_0_509 | 27430 | MAT2B   |
| Synapse_PPI_Communities | Syn-4_0_509 | 83992 | CTTNBP2 |
| Synapse_PPI_Communities | Syn-4_0_509 | 3646  | EIF3E   |
| Synapse_PPI_Communities | Syn-4_0_509 | 85440 | DOCK7   |
| Synapse_PPI_Communities | Syn-4_0_509 | 27044 | SND1    |
| Synapse_PPI_Communities | Syn-4_0_509 | 29109 | FHOD1   |
| Synapse_PPI_Communities | Syn-4_0_509 | 60    | ACTB    |
| Synapse_PPI_Communities | Syn-4_0_509 | 71    | ACTG1   |
| Synapse_PPI_Communities | Syn-4_0_509 | 5127  | CDK16   |
| Synapse_PPI_Communities | Syn-4_0_509 | 369   | ARAF    |
| Synapse_PPI_Communities | Syn-4_0_509 | 65125 | WNK1    |
| Synapse_PPI_Communities | Syn-4_0_509 | 6232  | RPS27   |
| Synapse_PPI_Communities | Syn-4_0_509 | 9101  | USP8    |
| Synapse_PPI_Communities | Syn-4_0_509 | 5230  | PGK1    |
| Synapse_PPI_Communities | Syn-4_0_509 | 2023  | ENO1    |
| Synapse_PPI_Communities | Syn-4_0_509 | 7167  | TPI1    |
| Synapse_PPI_Communities | Syn-4_0_509 | 8661  | EIF3A   |
| Synapse_PPI_Communities | Syn-4_0_509 | 10576 | CCT2    |
| Synapse_PPI_Communities | Syn-4_0_509 | 5520  | PPP2R2A |
| Synapse_PPI_Communities | Syn-4_0_509 | 6801  | STRN    |
| Synapse_PPI_Communities | Syn-4_0_509 | 908   | CCT6A   |
| Synapse_PPI_Communities | Syn-4_0_509 | 23450 | SF3B3   |
| Synapse_PPI_Communities | Syn-4_0_509 | 6208  | RPS14   |
| Synapse_PPI_Communities | Syn-4_0_509 | 23327 | NEDD4L  |
| Synapse_PPI_Communities | Syn-4_0_509 | 6209  | RPS15   |
| Synapse_PPI_Communities | Syn-4_0_509 | 4486  | MST1R   |
| Synapse_PPI_Communities | Syn-4_0_509 | 10133 | OPTN    |
| Synapse_PPI_Communities | Syn-4_0_509 | 10238 | DCAF7   |
| Synapse_PPI_Communities | Syn-4_0_509 | 6157  | RPL27A  |
| Synapse_PPI_Communities | Syn-4_0_509 | 2539  | G6PD    |
| Synapse_PPI_Communities | Syn-4_0_509 | 6927  | HNF1A   |
| Synapse_PPI_Communities | Syn-4_0_509 | 6231  | RPS26   |
| Synapse_PPI_Communities | Syn-4_0_509 | 5524  | PPP2R4  |
| Synapse_PPI_Communities | Syn-4_0_509 | 29966 | STRN3   |
| Synapse_PPI_Communities | Syn-4_0_509 | 5531  | PPP4C   |
| Synapse_PPI_Communities | Syn-4_0_509 | 3799  | KIF5B   |
| Synapse_PPI_Communities | Syn-4_0_509 | 89953 | KLC4    |
| Synapse_PPI_Communities | Syn-4_0_509 | 22948 | CCT5    |
| Synapse_PPI_Communities | Syn-4_0_509 | 4670  | HNRNPM  |
| Synapse_PPI_Communities | Syn-4_0_509 | 7531  | YWHAE   |
| Synapse_PPI_Communities | Syn-4_0_509 | 351   | APP     |
| Synapse_PPI_Communities | Syn-4_0_509 | 6227  | RPS21   |
| Synapse_PPI_Communities | Syn-4_0_509 | 5747  | PTK2    |
| Synapse_PPI_Communities | Syn-4_0_509 | 23367 | LARP1   |

|                         |             |        |          |
|-------------------------|-------------|--------|----------|
| Synapse_PPI_Communities | Syn-4_0_509 | 1029   | CDKN2A   |
| Synapse_PPI_Communities | Syn-4_0_509 | 8428   | STK24    |
| Synapse_PPI_Communities | Syn-4_0_509 | 5521   | PPP2R2B  |
| Synapse_PPI_Communities | Syn-4_0_509 | 1499   | CTNNB1   |
| Synapse_PPI_Communities | Syn-4_0_509 | 7345   | UCHL1    |
| Synapse_PPI_Communities | Syn-4_0_509 | 1956   | EGFR     |
| Synapse_PPI_Communities | Syn-4_0_509 | 3303   | HSPA1A   |
| Synapse_PPI_Communities | Syn-4_0_509 | 5062   | PAK2     |
| Synapse_PPI_Communities | Syn-4_0_509 | 135138 | PACRG    |
| Synapse_PPI_Communities | Syn-4_0_509 | 4904   | YBX1     |
| Synapse_PPI_Communities | Syn-4_0_509 | 3313   | HSPA9    |
| Synapse_PPI_Communities | Syn-4_0_509 | 5580   | PRKCD    |
| Synapse_PPI_Communities | Syn-4_0_509 | 10399  | GNB2L1   |
| Synapse_PPI_Communities | Syn-4_0_509 | 7414   | VCL      |
| Synapse_PPI_Communities | Syn-4_0_509 | 26986  | PABPC1   |
| Synapse_PPI_Communities | Syn-4_0_509 | 3309   | HSPA5    |
| Synapse_PPI_Communities | Syn-4_0_509 | 80086  | TUBA4B   |
| Synapse_PPI_Communities | Syn-4_0_509 | 1173   | AP2M1    |
| Synapse_PPI_Communities | Syn-4_0_509 | 84790  | TUBA1C   |
| Synapse_PPI_Communities | Syn-4_0_509 | 5515   | PPP2CA   |
| Synapse_PPI_Communities | Syn-4_0_509 | 25     | ABL1     |
| Synapse_PPI_Communities | Syn-4_0_509 | 3383   | ICAM1    |
| Synapse_PPI_Communities | Syn-4_0_509 | 3476   | IGBP1    |
| Synapse_PPI_Communities | Syn-4_0_509 | 2932   | GSK3B    |
| Synapse_PPI_Communities | Syn-4_0_509 | 6622   | SNCA     |
| Synapse_PPI_Communities | Syn-4_0_509 | 4193   | MDM2     |
| Synapse_PPI_Communities | Syn-4_0_509 | 5598   | MAPK7    |
| Synapse_PPI_Communities | Syn-4_0_509 | 6711   | SPTBN1   |
| Synapse_PPI_Communities | Syn-4_0_509 | 6709   | SPTAN1   |
| Synapse_PPI_Communities | Syn-4_0_509 | 867    | CBL      |
| Synapse_PPI_Communities | Syn-4_0_509 | 9531   | BAG3     |
| Synapse_PPI_Communities | Syn-4_0_509 | 4627   | MYH9     |
| Synapse_PPI_Communities | Syn-4_0_509 | 84959  | UBASH3B  |
| Synapse_PPI_Communities | Syn-4_0_509 | 1386   | ATF2     |
| Synapse_PPI_Communities | Syn-4_0_509 | 3014   | H2AFX    |
| Synapse_PPI_Communities | Syn-4_0_509 | 5684   | PSMA3    |
| Synapse_PPI_Communities | Syn-4_0_509 | 9657   | IQCB1    |
| Synapse_PPI_Communities | Syn-4_0_509 | 1994   | ELAVL1   |
| Synapse_PPI_Communities | Syn-4_0_509 | 408    | ARRB1    |
| Synapse_PPI_Communities | Syn-4_0_509 | 2099   | ESR1     |
| Synapse_PPI_Communities | Syn-4_0_509 | 9924   | PAN2     |
| Synapse_PPI_Communities | Syn-4_0_509 | 54165  | DCUN1D1  |
| Synapse_PPI_Communities | Syn-4_0_509 | 1457   | CSNK2A1  |
| Synapse_PPI_Communities | Syn-4_0_509 | 9775   | EIF4A3   |
| Synapse_PPI_Communities | Syn-4_0_509 | 1072   | CFL1     |
| Synapse_PPI_Communities | Syn-4_0_509 | 6464   | SHC1     |
| Synapse_PPI_Communities | Syn-4_0_509 | 10537  | UBD      |
| Synapse_PPI_Communities | Syn-4_0_509 | 708    | C1QBP    |
| Synapse_PPI_Communities | Syn-4_0_509 | 5052   | PRDX1    |
| Synapse_PPI_Communities | Syn-4_0_509 | 5518   | PPP2R1A  |
| Synapse_PPI_Communities | Syn-4_0_509 | 302    | ANXA2    |
| Synapse_PPI_Communities | Syn-4_0_509 | 5071   | PARK2    |
| Synapse_PPI_Communities | Syn-4_0_509 | 7412   | VCAM1    |
| Synapse_PPI_Communities | Syn-4_0_509 | 3326   | HSP90AB1 |
| Synapse_PPI_Communities | Syn-4_0_509 | 51547  | SIRT7    |
| Synapse_PPI_Communities | Syn-4_0_509 | 8450   | CUL4B    |
| Synapse_PPI_Communities | Syn-4_0_509 | 4869   | NPM1     |
| Synapse_PPI_Communities | Syn-4_0_509 | 154    | ADRB2    |

|                         |             |        |           |
|-------------------------|-------------|--------|-----------|
| Synapse_PPI_Communities | Syn-4_0_509 | 4843   | NOS2      |
| Synapse_PPI_Communities | Syn-4_0_509 | 57154  | SMURF1    |
| Synapse_PPI_Communities | Syn-4_0_509 | 59342  | SCPEP1    |
| Synapse_PPI_Communities | Syn-4_0_509 | 7317   | UBA1      |
| Synapse_PPI_Communities | Syn-4_0_509 | 16     | AARS      |
| Synapse_PPI_Communities | Syn-4_0_509 | 1827   | RCAN1     |
| Synapse_PPI_Communities | Syn-4_0_509 | 29127  | RACGAP1   |
| Synapse_PPI_Communities | Syn-4_0_509 | 55103  | RALGPS2   |
| Synapse_PPI_Communities | Syn-4_0_509 | 8729   | GBF1      |
| Synapse_PPI_Communities | Syn-4_0_509 | 728689 | EIF3CL    |
| Synapse_PPI_Communities | Syn-4_0_509 | 3308   | HSPA4     |
| Synapse_PPI_Communities | Syn-4_0_509 | 9555   | H2AFY     |
| Synapse_PPI_Communities | Syn-4_0_509 | 84365  | MKI67IP   |
| Synapse_PPI_Communities | Syn-4_0_509 | 6158   | RPL28     |
| Synapse_PPI_Communities | Syn-4_0_509 | 26354  | GNL3      |
| Synapse_PPI_Communities | Syn-4_0_509 | 5936   | RBM4      |
| Synapse_PPI_Communities | Syn-4_0_509 | 6500   | SKP1      |
| Synapse_PPI_Communities | Syn-4_0_509 | 26273  | FBXO3     |
| Synapse_PPI_Communities | Syn-4_0_509 | 10487  | CAP1      |
| Synapse_PPI_Communities | Syn-4_0_509 | 2194   | FASN      |
| Synapse_PPI_Communities | Syn-4_0_509 | 7170   | TPM3      |
| Synapse_PPI_Communities | Syn-4_0_509 | 6235   | RPS29     |
| Synapse_PPI_Communities | Syn-4_0_509 | 2091   | FBL       |
| Synapse_PPI_Communities | Syn-4_0_509 | 1508   | CTSB      |
| Synapse_PPI_Communities | Syn-4_0_509 | 4809   | NHP2L1    |
| Synapse_PPI_Communities | Syn-4_0_509 | 8664   | EIF3D     |
| Synapse_PPI_Communities | Syn-4_0_509 | 84206  | MEX3B     |
| Synapse_PPI_Communities | Syn-4_0_509 | 93144  | RPS10P5   |
| Synapse_PPI_Communities | Syn-4_0_509 | 9921   | RNF10     |
| Synapse_PPI_Communities | Syn-4_0_509 | 55646  | LYAR      |
| Synapse_PPI_Communities | Syn-4_0_509 | 4139   | MARK1     |
| Synapse_PPI_Communities | Syn-4_0_509 | 6737   | TRIM21    |
| Synapse_PPI_Communities | Syn-4_0_509 | 9156   | EXO1      |
| Synapse_PPI_Communities | Syn-4_0_509 | 1999   | ELF3      |
| Synapse_PPI_Communities | Syn-4_0_509 | 4839   | NOP2      |
| Synapse_PPI_Communities | Syn-4_0_509 | 23332  | CLASP1    |
| Synapse_PPI_Communities | Syn-4_0_509 | 80153  | EDC3      |
| Synapse_PPI_Communities | Syn-4_0_509 | 55095  | SAMD4B    |
| Synapse_PPI_Communities | Syn-4_0_509 | 26064  | RAI14     |
| Synapse_PPI_Communities | Syn-4_0_509 | 51386  | EIF3L     |
| Synapse_PPI_Communities | Syn-4_0_509 | 3018   | HIST1H2BB |
| Synapse_PPI_Communities | Syn-4_0_509 | 29968  | PSAT1     |
| Synapse_PPI_Communities | Syn-4_0_509 | 6184   | RPN1      |
| Synapse_PPI_Communities | Syn-4_0_509 | 6651   | SON       |
| Synapse_PPI_Communities | Syn-4_0_509 | 4113   | MAGEB2    |
| Synapse_PPI_Communities | Syn-4_0_509 | 23020  | SNRNP200  |
| Synapse_PPI_Communities | Syn-4_0_509 | 3106   | HLA-B     |
| Synapse_PPI_Communities | Syn-4_0_509 | 7410   | VAV2      |
| Synapse_PPI_Communities | Syn-4_0_509 | 9414   | TJP2      |
| Synapse_PPI_Communities | Syn-4_0_509 | 4799   | NFX1      |
| Synapse_PPI_Communities | Syn-4_0_509 | 6897   | TARS      |
| Synapse_PPI_Communities | Syn-4_0_509 | 4629   | MYH11     |
| Synapse_PPI_Communities | Syn-4_0_509 | 10693  | CCT6B     |
| Synapse_PPI_Communities | Syn-4_0_509 | 54606  | DDX56     |
| Synapse_PPI_Communities | Syn-4_0_509 | 64092  | SAMSN1    |
| Synapse_PPI_Communities | Syn-4_0_509 | 5687   | PSMA6     |
| Synapse_PPI_Communities | Syn-4_0_509 | 4174   | MCM5      |
| Synapse_PPI_Communities | Syn-4_0_509 | 6154   | RPL26     |

|                         |             |        |          |
|-------------------------|-------------|--------|----------|
| Synapse_PPI_Communities | Syn-4_0_509 | 7278   | TUBA3C   |
| Synapse_PPI_Communities | Syn-4_0_509 | 22954  | TRIM32   |
| Synapse_PPI_Communities | Syn-4_0_509 | 3310   | HSPA6    |
| Synapse_PPI_Communities | Syn-4_0_509 | 4140   | MARK3    |
| Synapse_PPI_Communities | Syn-4_0_509 | 5585   | PKN1     |
| Synapse_PPI_Communities | Syn-4_0_509 | 84305  | WIBG     |
| Synapse_PPI_Communities | Syn-4_0_509 | 23313  | KIAA0930 |
| Synapse_PPI_Communities | Syn-4_0_509 | 22827  | PUF60    |
| Synapse_PPI_Communities | Syn-4_0_509 | 9978   | RBX1     |
| Synapse_PPI_Communities | Syn-4_0_509 | 5998   | RGS3     |
| Synapse_PPI_Communities | Syn-4_0_509 | 55699  | IARS2    |
| Synapse_PPI_Communities | Syn-4_0_509 | 5049   | PAFAH1B2 |
| Synapse_PPI_Communities | Syn-4_0_509 | 2937   | GSS      |
| Synapse_PPI_Communities | Syn-4_0_509 | 4673   | NAP1L1   |
| Synapse_PPI_Communities | Syn-4_0_509 | 7001   | PRDX2    |
| Synapse_PPI_Communities | Syn-4_0_509 | 261726 | TIPRL    |
| Synapse_PPI_Communities | Syn-4_0_509 | 3621   | ING1     |
| Synapse_PPI_Communities | Syn-4_0_509 | 28960  | DCPS     |
| Synapse_PPI_Communities | Syn-4_0_509 | 821    | CANX     |
| Synapse_PPI_Communities | Syn-4_0_509 | 7248   | TSC1     |
| Synapse_PPI_Communities | Syn-4_0_509 | 1676   | DFFA     |
| Synapse_PPI_Communities | Syn-4_0_509 | 5128   | CDK17    |
| Synapse_PPI_Communities | Syn-4_0_509 | 10979  | FERMT2   |
| Synapse_PPI_Communities | Syn-4_0_509 | 9967   | THRAP3   |
| Synapse_PPI_Communities | Syn-4_0_509 | 26227  | PHGDH    |
| Synapse_PPI_Communities | Syn-4_0_509 | 5686   | PSMA5    |
| Synapse_PPI_Communities | Syn-4_0_509 | 55054  | ATG16L1  |
| Synapse_PPI_Communities | Syn-4_0_509 | 10458  | BAIAP2   |
| Synapse_PPI_Communities | Syn-4_0_509 | 6733   | SRPK2    |
| Synapse_PPI_Communities | Syn-4_0_509 | 7280   | TUBB2A   |
| Synapse_PPI_Communities | Syn-4_0_509 | 11344  | TWF2     |
| Synapse_PPI_Communities | Syn-4_0_509 | 3098   | HK1      |
| Synapse_PPI_Communities | Syn-4_0_509 | 5710   | PSMD4    |
| Synapse_PPI_Communities | Syn-4_0_509 | 10298  | PAK4     |
| Synapse_PPI_Communities | Syn-4_0_509 | 9343   | EFTUD2   |
| Synapse_PPI_Communities | Syn-4_0_509 | 55844  | PPP2R2D  |
| Synapse_PPI_Communities | Syn-4_0_509 | 7965   | AIMP2    |
| Synapse_PPI_Communities | Syn-4_0_509 | 6161   | RPL32    |
| Synapse_PPI_Communities | Syn-4_0_509 | 26259  | FBXW8    |
| Synapse_PPI_Communities | Syn-4_0_509 | 7128   | TNFAIP3  |
| Synapse_PPI_Communities | Syn-4_0_509 | 80335  | WDR82    |
| Synapse_PPI_Communities | Syn-4_0_509 | 10915  | TCERG1   |
| Synapse_PPI_Communities | Syn-4_0_509 | 56061  | UBFD1    |
| Synapse_PPI_Communities | Syn-4_0_509 | 2773   | GNAI3    |
| Synapse_PPI_Communities | Syn-4_0_509 | 6612   | SUMO3    |
| Synapse_PPI_Communities | Syn-4_0_509 | 9368   | SLC9A3R1 |
| Synapse_PPI_Communities | Syn-4_0_509 | 10413  | YAP1     |
| Synapse_PPI_Communities | Syn-4_0_509 | 1778   | DYNC1H1  |
| Synapse_PPI_Communities | Syn-4_0_509 | 2316   | FLNA     |
| Synapse_PPI_Communities | Syn-4_0_509 | 840    | CASP7    |
| Synapse_PPI_Communities | Syn-4_0_509 | 1213   | CLTC     |
| Synapse_PPI_Communities | Syn-4_0_509 | 30011  | SH3KBP1  |
| Synapse_PPI_Communities | Syn-4_0_509 | 8867   | SYNJ1    |
| Synapse_PPI_Communities | Syn-4_0_509 | 7337   | UBE3A    |
| Synapse_PPI_Communities | Syn-4_0_509 | 5522   | PPP2R2C  |
| Synapse_PPI_Communities | Syn-4_0_509 | 5058   | PAK1     |
| Synapse_PPI_Communities | Syn-4_0_509 | 9221   | NOLC1    |
| Synapse_PPI_Communities | Syn-4_0_509 | 3191   | HNRNPL   |



|                         |             |        |           |
|-------------------------|-------------|--------|-----------|
| Synapse_PPI_Communities | Syn-4_0_509 | 8471   | IRS4      |
| Synapse_PPI_Communities | Syn-4_0_509 | 8496   | PPFIBP1   |
| Synapse_PPI_Communities | Syn-4_0_509 | 2869   | GRK5      |
| Synapse_PPI_Communities | Syn-4_0_509 | 1175   | AP2S1     |
| Synapse_PPI_Communities | Syn-4_0_509 | 4301   | MLLT4     |
| Synapse_PPI_Communities | Syn-4_0_509 | 1975   | EIF4B     |
| Synapse_PPI_Communities | Syn-4_0_509 | 695    | BTK       |
| Synapse_PPI_Communities | Syn-4_0_509 | 6206   | RPS12     |
| Synapse_PPI_Communities | Syn-4_0_509 | 5289   | PIK3C3    |
| Synapse_PPI_Communities | Syn-4_0_509 | 1665   | DHX15     |
| Synapse_PPI_Communities | Syn-4_0_509 | 10155  | TRIM28    |
| Synapse_PPI_Communities | Syn-4_0_509 | 1653   | DDX1      |
| Synapse_PPI_Communities | Syn-4_0_509 | 64837  | KLC2      |
| Synapse_PPI_Communities | Syn-4_0_509 | 8161   | COIL      |
| Synapse_PPI_Communities | Syn-4_0_509 | 1203   | CLN5      |
| Synapse_PPI_Communities | Syn-4_0_509 | 3998   | LMAN1     |
| Synapse_PPI_Communities | Syn-4_0_509 | 2197   | FAU       |
| Synapse_PPI_Communities | Syn-4_0_509 | 8533   | COPS3     |
| Synapse_PPI_Communities | Syn-4_0_509 | 6204   | RPS10     |
| Synapse_PPI_Communities | Syn-4_0_509 | 3875   | KRT18     |
| Synapse_PPI_Communities | Syn-4_0_509 | 1027   | CDKN1B    |
| Synapse_PPI_Communities | Syn-4_0_509 | 5621   | PRNP      |
| Synapse_PPI_Communities | Syn-4_0_509 | 23411  | SIRT1     |
| Synapse_PPI_Communities | Syn-4_0_509 | 10130  | PDIA6     |
| Synapse_PPI_Communities | Syn-4_0_509 | 871    | SERPINH1  |
| Synapse_PPI_Communities | Syn-4_0_509 | 984    | CDK11B    |
| Synapse_PPI_Communities | Syn-4_0_509 | 5226   | PGD       |
| Synapse_PPI_Communities | Syn-4_0_509 | 3939   | LDHA      |
| Synapse_PPI_Communities | Syn-4_0_509 | 51631  | LUC7L2    |
| Synapse_PPI_Communities | Syn-4_0_509 | 26135  | SERBP1    |
| Synapse_PPI_Communities | Syn-4_0_509 | 4214   | MAP3K1    |
| Synapse_PPI_Communities | Syn-4_0_509 | 6742   | SSBP1     |
| Synapse_PPI_Communities | Syn-4_0_509 | 817    | CAMK2D    |
| Synapse_PPI_Communities | Syn-4_0_509 | 64326  | RFWD2     |
| Synapse_PPI_Communities | Syn-4_0_509 | 8517   | IKBKG     |
| Synapse_PPI_Communities | Syn-4_0_509 | 81567  | TXNDC5    |
| Synapse_PPI_Communities | Syn-4_0_509 | 5894   | RAF1      |
| Synapse_PPI_Communities | Syn-4_0_509 | 3305   | HSPA1L    |
| Synapse_PPI_Communities | Syn-4_0_509 | 653333 | FAM86B2   |
| Synapse_PPI_Communities | Syn-4_0_509 | 11198  | SUPT16H   |
| Synapse_PPI_Communities | Syn-4_0_509 | 5886   | RAD23A    |
| Synapse_PPI_Communities | Syn-4_0_509 | 2010   | EMD       |
| Synapse_PPI_Communities | Syn-4_0_509 | 1973   | EIF4A1    |
| Synapse_PPI_Communities | Syn-4_0_509 | 1983   | EIF5      |
| Synapse_PPI_Communities | Syn-4_0_509 | 11345  | GABARAPL2 |
| Synapse_PPI_Communities | Syn-4_0_509 | 5584   | PRKCI     |
| Synapse_PPI_Communities | Syn-4_0_509 | 142    | PARP1     |
| Synapse_PPI_Communities | Syn-4_0_509 | 3304   | HSPA1B    |
| Synapse_PPI_Communities | Syn-4_0_509 | 6428   | SRSF3     |
| Synapse_PPI_Communities | Syn-4_0_509 | 7334   | UBE2N     |
| Synapse_PPI_Communities | Syn-4_0_509 | 1207   | CLNS1A    |
| Synapse_PPI_Communities | Syn-4_0_509 | 25843  | MOB4      |
| Synapse_PPI_Communities | Syn-4_0_509 | 3800   | KIF5C     |
| Synapse_PPI_Communities | Syn-4_0_509 | 3692   | EIF6      |
| Synapse_PPI_Communities | Syn-4_0_509 | 6513   | SLC2A1    |
| Synapse_PPI_Communities | Syn-4_0_509 | 2923   | PDIA3     |
| Synapse_PPI_Communities | Syn-4_0_509 | 23095  | KIF1B     |
| Synapse_PPI_Communities | Syn-4_0_509 | 4628   | MYH10     |

|                         |             |        |          |
|-------------------------|-------------|--------|----------|
| Synapse_PPI_Communities | Syn-4_0_509 | 8766   | RAB11A   |
| Synapse_PPI_Communities | Syn-4_0_509 | 220988 | HNRNPA3  |
| Synapse_PPI_Communities | Syn-4_0_509 | 6468   | FBXW4    |
| Synapse_PPI_Communities | Syn-4_0_509 | 92342  | METTL18  |
| Synapse_PPI_Communities | Syn-4_0_509 | 5223   | PGAM1    |
| Synapse_PPI_Communities | Syn-4_0_509 | 4088   | SMAD3    |
| Synapse_PPI_Communities | Syn-4_0_509 | 55611  | OTUB1    |
| Synapse_PPI_Communities | Syn-4_0_509 | 4851   | NOTCH1   |
| Synapse_PPI_Communities | Syn-4_0_509 | 3831   | KLC1     |
| Synapse_PPI_Communities | Syn-4_0_509 | 3945   | LDHB     |
| Synapse_PPI_Communities | Syn-4_0_509 | 1025   | CDK9     |
| Synapse_PPI_Communities | Syn-4_0_509 | 10787  | NCKAP1   |
| Synapse_PPI_Communities | Syn-4_0_509 | 1432   | MAPK14   |
| Synapse_PPI_Communities | Syn-4_0_509 | 1655   | DDX5     |
| Synapse_PPI_Communities | Syn-4_0_509 | 51762  | RAB8B    |
| Synapse_PPI_Communities | Syn-4_0_509 | 3187   | HNRNPH1  |
| Synapse_PPI_Communities | Syn-4_0_509 | 5296   | PIK3R2   |
| Synapse_PPI_Communities | Syn-4_0_509 | 3192   | HNRNPU   |
| Synapse_PPI_Communities | Syn-4_0_509 | 10376  | TUBA1B   |
| Synapse_PPI_Communities | Syn-4_0_509 | 10381  | TUBB3    |
| Synapse_PPI_Communities | Syn-4_0_509 | 5604   | MAP2K1   |
| Synapse_PPI_Communities | Syn-4_0_509 | 5591   | PRKDC    |
| Synapse_PPI_Communities | Syn-4_0_509 | 5111   | PCNA     |
| Synapse_PPI_Communities | Syn-4_0_509 | 1660   | DHX9     |
| Synapse_PPI_Communities | Syn-4_0_509 | 5478   | PPIA     |
| Synapse_PPI_Communities | Syn-4_0_509 | 3178   | HNRNPA1  |
| Synapse_PPI_Communities | Syn-4_0_509 | 826    | CAPNS1   |
| Synapse_PPI_Communities | Syn-4_0_509 | 5048   | PAFAH1B1 |
| Synapse_PPI_Communities | Syn-4_0_509 | 5590   | PRKCZ    |
| Synapse_PPI_Communities | Syn-4_0_509 | 5683   | PSMA2    |
| Synapse_PPI_Communities | Syn-4_0_509 | 23524  | SRRM2    |
| Synapse_PPI_Communities | Syn-4_0_509 | 8826   | IQGAP1   |
| Synapse_PPI_Communities | Syn-4_0_509 | 1488   | CTBP2    |
| Synapse_PPI_Communities | Syn-4_0_509 | 1937   | EEF1G    |
| Synapse_PPI_Communities | Syn-4_0_509 | 2631   | GBAS     |
| Synapse_PPI_Communities | Syn-4_0_509 | 7431   | VIM      |
| Synapse_PPI_Communities | Syn-4_0_509 | 10383  | TUBB4B   |
| Synapse_PPI_Communities | Syn-4_0_509 | 1500   | CTNND1   |
| Synapse_PPI_Communities | Syn-4_0_509 | 1495   | CTNNA1   |
| Synapse_PPI_Communities | Syn-4_0_509 | 5663   | PSEN1    |
| Synapse_PPI_Communities | Syn-4_0_509 | 207    | AKT1     |
| Synapse_PPI_Communities | Syn-4_0_509 | 3064   | HTT      |
| Synapse_PPI_Communities | Syn-4_0_509 | 1639   | DCTN1    |
| Synapse_PPI_Communities | Syn-4_0_509 | 10540  | DCTN2    |
| Synapse_PPI_Communities | Syn-4_0_509 | 3329   | HSPD1    |
| Synapse_PPI_Communities | Syn-4_0_509 | 999    | CDH1     |
| Synapse_PPI_Communities | Syn-4_0_509 | 6714   | SRC      |
| Synapse_PPI_Communities | Syn-4_0_509 | 7052   | TGM2     |
| Synapse_PPI_Communities | Syn-4_0_509 | 51377  | UCHL5    |
| Synapse_PPI_Communities | Syn-4_0_509 | 5536   | PPP5C    |
| Synapse_PPI_Communities | Syn-4_0_509 | 10963  | STIP1    |
| Synapse_PPI_Communities | Syn-4_0_509 | 9146   | HGS      |
| Synapse_PPI_Communities | Syn-4_0_509 | 4137   | MAPT     |
| Synapse_PPI_Communities | Syn-4_0_509 | 120892 | LRRK2    |
| Synapse_PPI_Communities | Syn-4_0_509 | 1020   | CDK5     |
| Synapse_PPI_Communities | Syn-4_0_509 | 8841   | HDAC3    |
| Synapse_PPI_Communities | Syn-4_0_509 | 506    | ATP5B    |
| Synapse_PPI_Communities | Syn-4_0_509 | 5245   | PHB      |

|                         |             |        |          |
|-------------------------|-------------|--------|----------|
| Synapse_PPI_Communities | Syn-4_0_509 | 7157   | TP53     |
| Synapse_PPI_Communities | Syn-4_0_509 | 3190   | HNRNPK   |
| Synapse_PPI_Communities | Syn-4_0_509 | 1398   | CRK      |
| Synapse_PPI_Communities | Syn-4_0_509 | 51552  | RAB14    |
| Synapse_PPI_Communities | Syn-4_0_509 | 51741  | WWOX     |
| Synapse_PPI_Communities | Syn-4_0_509 | 988    | CDC5L    |
| Synapse_PPI_Communities | Syn-4_0_509 | 920    | CD4      |
| Synapse_PPI_Communities | Syn-4_0_509 | 8451   | CUL4A    |
| Synapse_PPI_Communities | Syn-4_0_509 | 5195   | PEX14    |
| Synapse_PPI_Communities | Syn-4_0_509 | 3184   | HNRNPD   |
| Synapse_PPI_Communities | Syn-4_0_509 | 1460   | CSNK2B   |
| Synapse_PPI_Communities | Syn-4_0_509 | 1026   | CDKN1A   |
| Synapse_PPI_Communities | Syn-4_0_509 | 26146  | TRAF3IP1 |
| Synapse_PPI_Communities | Syn-4_0_509 | 11034  | DSTN     |
| Synapse_PPI_Communities | Syn-4_0_509 | 7879   | RAB7A    |
| Synapse_PPI_Communities | Syn-4_0_509 | 5479   | PIIB     |
| Synapse_PPI_Communities | Syn-4_0_509 | 387082 | SUMO4    |
| Synapse_PPI_Communities | Syn-4_0_509 | 1627   | DBN1     |
| Synapse_PPI_Communities | Syn-4_0_509 | 4116   | MAGOH    |
| Synapse_PPI_Communities | Syn-4_0_509 | 5501   | PPP1CC   |
| Synapse_PPI_Communities | Syn-4_0_509 | 7086   | TKT      |
| Synapse_PPI_Communities | Syn-4_0_509 | 498    | ATP5A1   |
| Synapse_PPI_Communities | Syn-4_0_509 | 5879   | RAC1     |
| Synapse_PPI_Communities | Syn-4_0_509 | 5893   | RAD52    |
| Synapse_PPI_Communities | Syn-4_0_509 | 56257  | MEPCE    |
| Synapse_PPI_Communities | Syn-4_0_509 | 5216   | PFN1     |
| Synapse_PPI_Communities | Syn-4_0_509 | 3611   | ILK      |
| Synapse_PPI_Communities | Syn-4_0_509 | 10397  | NDRG1    |
| Synapse_PPI_Communities | Syn-4_0_509 | 6117   | RPA1     |
| Synapse_PPI_Communities | Syn-4_0_509 | 310    | ANXA7    |
| Synapse_PPI_Communities | Syn-4_0_509 | 301    | ANXA1    |
| Synapse_PPI_Communities | Syn-4_0_509 | 25895  | METTL21B |
| Synapse_PPI_Communities | Syn-4_0_509 | 160    | AP2A1    |
| Synapse_PPI_Communities | Syn-4_0_509 | 161    | AP2A2    |
| Synapse_PPI_Communities | Syn-4_0_509 | 3301   | DNAJA1   |
| Synapse_PPI_Communities | Syn-4_0_509 | 7295   | TXN      |
| Synapse_PPI_Communities | Syn-4_0_509 | 10980  | COPS6    |
| Synapse_PPI_Communities | Syn-4_0_509 | 7428   | VHL      |
| Synapse_PPI_Communities | Syn-4_0_509 | 26260  | FBXO25   |
| Synapse_PPI_Communities | Syn-4_0_509 | 8726   | EED      |
| Synapse_PPI_Communities | Syn-4_0_509 | 5885   | RAD21    |
| Synapse_PPI_Communities | Syn-4_0_509 | 6119   | RPA3     |
| Synapse_PPI_Communities | Syn-4_0_509 | 4899   | NRF1     |
| Synapse_PPI_Communities | Syn-4_0_509 | 801    | CALM1    |
| Synapse_PPI_Communities | Syn-4_0_509 | 4609   | MYC      |
| Synapse_PPI_Communities | Syn-4_0_509 | 9636   | ISG15    |
| Synapse_PPI_Communities | Syn-4_0_509 | 6118   | RPA2     |
| Synapse_PPI_Communities | Syn-4_0_509 | 3837   | KPNB1    |
| Synapse_PPI_Communities | Syn-3_5_12  | 2891   | GRIA2    |
| Synapse_PPI_Communities | Syn-3_5_12  | 2901   | GRIK5    |
| Synapse_PPI_Communities | Syn-3_5_12  | 2895   | GRID2    |
| Synapse_PPI_Communities | Syn-3_5_12  | 6386   | SDCBP    |
| Synapse_PPI_Communities | Syn-3_5_12  | 2890   | GRIA1    |
| Synapse_PPI_Communities | Syn-3_5_12  | 2893   | GRIA4    |
| Synapse_PPI_Communities | Syn-3_5_12  | 10369  | CACNG2   |
| Synapse_PPI_Communities | Syn-3_5_12  | 2898   | GRIK2    |
| Synapse_PPI_Communities | Syn-3_5_12  | 1742   | DLG4     |
| Synapse_PPI_Communities | Syn-3_5_12  | 1741   | DLG3     |

|                         |              |        |         |
|-------------------------|--------------|--------|---------|
| Synapse_PPI_Communities | Syn-3_5_12   | 23426  | GRIP1   |
| Synapse_PPI_Communities | Syn-3_5_12   | 9463   | PICK1   |
| Synapse_PPI_Communities | Syn-3_24_3   | 3897   | L1CAM   |
| Synapse_PPI_Communities | Syn-3_24_3   | 6900   | CNTN2   |
| Synapse_PPI_Communities | Syn-3_24_3   | 1463   | NCAN    |
| Synapse_PPI_Communities | Syn-3_1_3    | 6854   | SYN2    |
| Synapse_PPI_Communities | Syn-3_1_3    | 8224   | SYN3    |
| Synapse_PPI_Communities | Syn-3_1_3    | 9722   | NOS1AP  |
| Synapse_PPI_Communities | Syn-3_0_2312 | 1915   | EEF1A1  |
| Synapse_PPI_Communities | Syn-3_0_2312 | 6128   | RPL6    |
| Synapse_PPI_Communities | Syn-3_0_2312 | 6124   | RPL4    |
| Synapse_PPI_Communities | Syn-3_0_2312 | 1938   | EEF2    |
| Synapse_PPI_Communities | Syn-3_0_2312 | 6217   | RPS16   |
| Synapse_PPI_Communities | Syn-3_0_2312 | 55832  | CAND1   |
| Synapse_PPI_Communities | Syn-3_0_2312 | 140801 | RPL10L  |
| Synapse_PPI_Communities | Syn-3_0_2312 | 6189   | RPS3A   |
| Synapse_PPI_Communities | Syn-3_0_2312 | 7534   | YWHAZ   |
| Synapse_PPI_Communities | Syn-3_0_2312 | 4738   | NEDD8   |
| Synapse_PPI_Communities | Syn-3_0_2312 | 6152   | RPL24   |
| Synapse_PPI_Communities | Syn-3_0_2312 | 6137   | RPL13   |
| Synapse_PPI_Communities | Syn-3_0_2312 | 6205   | RPS11   |
| Synapse_PPI_Communities | Syn-3_0_2312 | 6138   | RPL15   |
| Synapse_PPI_Communities | Syn-3_0_2312 | 6193   | RPS5    |
| Synapse_PPI_Communities | Syn-3_0_2312 | 6134   | RPL10   |
| Synapse_PPI_Communities | Syn-3_0_2312 | 6132   | RPL8    |
| Synapse_PPI_Communities | Syn-3_0_2312 | 6223   | RPS19   |
| Synapse_PPI_Communities | Syn-3_0_2312 | 6130   | RPL7A   |
| Synapse_PPI_Communities | Syn-3_0_2312 | 6135   | RPL11   |
| Synapse_PPI_Communities | Syn-3_0_2312 | 6129   | RPL7    |
| Synapse_PPI_Communities | Syn-3_0_2312 | 6224   | RPS20   |
| Synapse_PPI_Communities | Syn-3_0_2312 | 6136   | RPL12   |
| Synapse_PPI_Communities | Syn-3_0_2312 | 6141   | RPL18   |
| Synapse_PPI_Communities | Syn-3_0_2312 | 6160   | RPL31   |
| Synapse_PPI_Communities | Syn-3_0_2312 | 6144   | RPL21   |
| Synapse_PPI_Communities | Syn-3_0_2312 | 6187   | RPS2    |
| Synapse_PPI_Communities | Syn-3_0_2312 | 6228   | RPS23   |
| Synapse_PPI_Communities | Syn-3_0_2312 | 4736   | RPL10A  |
| Synapse_PPI_Communities | Syn-3_0_2312 | 6191   | RPS4X   |
| Synapse_PPI_Communities | Syn-3_0_2312 | 6202   | RPS8    |
| Synapse_PPI_Communities | Syn-3_0_2312 | 6194   | RPS6    |
| Synapse_PPI_Communities | Syn-3_0_2312 | 6147   | RPL23A  |
| Synapse_PPI_Communities | Syn-3_0_2312 | 6125   | RPL5    |
| Synapse_PPI_Communities | Syn-3_0_2312 | 6188   | RPS3    |
| Synapse_PPI_Communities | Syn-3_0_2312 | 6613   | SUMO2   |
| Synapse_PPI_Communities | Syn-3_0_2312 | 7341   | SUMO1   |
| Synapse_PPI_Communities | Syn-3_0_2312 | 10987  | COPS5   |
| Synapse_PPI_Communities | Syn-3_0_2312 | 2335   | FN1     |
| Synapse_PPI_Communities | Syn-3_0_2312 | 6218   | RPS17   |
| Synapse_PPI_Communities | Syn-3_0_2312 | 6203   | RPS9    |
| Synapse_PPI_Communities | Syn-3_0_2312 | 93185  | IGSF8   |
| Synapse_PPI_Communities | Syn-3_0_2312 | 6155   | RPL27   |
| Synapse_PPI_Communities | Syn-3_0_2312 | 6122   | RPL3    |
| Synapse_PPI_Communities | Syn-3_0_2312 | 25873  | RPL36   |
| Synapse_PPI_Communities | Syn-3_0_2312 | 6233   | RPS27A  |
| Synapse_PPI_Communities | Syn-3_0_2312 | 6168   | RPL37A  |
| Synapse_PPI_Communities | Syn-3_0_2312 | 292    | SLC25A5 |
| Synapse_PPI_Communities | Syn-3_0_2312 | 6142   | RPL18A  |
| Synapse_PPI_Communities | Syn-3_0_2312 | 7532   | YWHAG   |

|                         |              |        |          |
|-------------------------|--------------|--------|----------|
| Synapse_PPI_Communities | Syn-3_0_2312 | 7529   | YWHAB    |
| Synapse_PPI_Communities | Syn-3_0_2312 | 7533   | YWHAH    |
| Synapse_PPI_Communities | Syn-3_0_2312 | 9181   | ARHGEF2  |
| Synapse_PPI_Communities | Syn-3_0_2312 | 7415   | VCP      |
| Synapse_PPI_Communities | Syn-3_0_2312 | 6234   | RPS28    |
| Synapse_PPI_Communities | Syn-3_0_2312 | 9045   | RPL14    |
| Synapse_PPI_Communities | Syn-3_0_2312 | 3608   | ILF2     |
| Synapse_PPI_Communities | Syn-3_0_2312 | 10528  | NOP56    |
| Synapse_PPI_Communities | Syn-3_0_2312 | 6201   | RPS7     |
| Synapse_PPI_Communities | Syn-3_0_2312 | 6230   | RPS25    |
| Synapse_PPI_Communities | Syn-3_0_2312 | 6146   | RPL22    |
| Synapse_PPI_Communities | Syn-3_0_2312 | 4691   | NCL      |
| Synapse_PPI_Communities | Syn-3_0_2312 | 6139   | RPL17    |
| Synapse_PPI_Communities | Syn-3_0_2312 | 6133   | RPL9     |
| Synapse_PPI_Communities | Syn-3_0_2312 | 6159   | RPL29    |
| Synapse_PPI_Communities | Syn-3_0_2312 | 6156   | RPL30    |
| Synapse_PPI_Communities | Syn-3_0_2312 | 6229   | RPS24    |
| Synapse_PPI_Communities | Syn-3_0_2312 | 6207   | RPS13    |
| Synapse_PPI_Communities | Syn-3_0_2312 | 9349   | RPL23    |
| Synapse_PPI_Communities | Syn-3_0_2312 | 220717 | RPLPOP6  |
| Synapse_PPI_Communities | Syn-3_0_2312 | 6143   | RPL19    |
| Synapse_PPI_Communities | Syn-3_0_2312 | 7203   | CCT3     |
| Synapse_PPI_Communities | Syn-3_0_2312 | 10574  | CCT7     |
| Synapse_PPI_Communities | Syn-3_0_2312 | 5516   | PPP2CB   |
| Synapse_PPI_Communities | Syn-3_0_2312 | 10694  | CCT8     |
| Synapse_PPI_Communities | Syn-3_0_2312 | 10014  | HDAC5    |
| Synapse_PPI_Communities | Syn-3_0_2312 | 10575  | CCT4     |
| Synapse_PPI_Communities | Syn-3_0_2312 | 6950   | TCP1     |
| Synapse_PPI_Communities | Syn-3_0_2312 | 3676   | ITGA4    |
| Synapse_PPI_Communities | Syn-3_0_2312 | 6176   | RPLP1    |
| Synapse_PPI_Communities | Syn-3_0_2312 | 6175   | RPLP0    |
| Synapse_PPI_Communities | Syn-3_0_2312 | 3609   | ILF3     |
| Synapse_PPI_Communities | Syn-3_0_2312 | 3320   | HSP90AA1 |
| Synapse_PPI_Communities | Syn-3_0_2312 | 6210   | RPS15A   |
| Synapse_PPI_Communities | Syn-3_0_2312 | 2885   | GRB2     |
| Synapse_PPI_Communities | Syn-3_0_2312 | 8452   | CUL3     |
| Synapse_PPI_Communities | Syn-3_0_2312 | 6045   | RNF2     |
| Synapse_PPI_Communities | Syn-3_0_2312 | 10971  | YWHAQ    |
| Synapse_PPI_Communities | Syn-3_0_2312 | 2597   | GAPDH    |
| Synapse_PPI_Communities | Syn-3_0_2312 | 203068 | TUBB     |
| Synapse_PPI_Communities | Syn-3_0_2312 | 26270  | FBXO6    |
| Synapse_PPI_Communities | Syn-3_0_2312 | 1017   | CDK2     |
| Synapse_PPI_Communities | Syn-3_0_2312 | 3312   | HSPA8    |
| Synapse_PPI_Communities | Syn-3_0_2312 | 8266   | UBL4A    |
| Synapse_PPI_Communities | Syn-3_0_2312 | 8454   | CUL1     |
| Synapse_PPI_Communities | Syn-3_0_2312 | 8065   | CUL5     |
| Synapse_PPI_Communities | Syn-3_0_2312 | 409    | ARRB2    |
| Synapse_PPI_Communities | Syn-3_0_2312 | 23435  | TARDBP   |
| Synapse_PPI_Communities | Syn-3_0_2312 | 3921   | RPSA     |
| Synapse_PPI_Communities | Syn-3_0_2312 | 6780   | STAU1    |
| Synapse_PPI_Communities | Syn-3_0_2312 | 8453   | CUL2     |
| Synapse_PPI_Communities | Syn-3_0_2312 | 7316   | UBC      |
| Synapse_PPI_Communities | Syn-3_0_2312 | 975    | CD81     |
| Synapse_PPI_Communities | Syn-3_0_2312 | 6222   | RPS18    |
| Synapse_PPI_Communities | Syn-3_0_2312 | 55720  | TSR1     |
| Synapse_PPI_Communities | Syn-3_0_2312 | 51065  | RPS27L   |
| Synapse_PPI_Communities | Syn-3_0_2312 | 65220  | NADK     |
| Synapse_PPI_Communities | Syn-3_0_2312 | 501    | ALDH7A1  |

|                         |              |       |          |
|-------------------------|--------------|-------|----------|
| Synapse_PPI_Communities | Syn-3_0_2312 | 26999 | CYFIP2   |
| Synapse_PPI_Communities | Syn-3_0_2312 | 9493  | KIF23    |
| Synapse_PPI_Communities | Syn-3_0_2312 | 811   | CALR     |
| Synapse_PPI_Communities | Syn-3_0_2312 | 7184  | HSP90B1  |
| Synapse_PPI_Communities | Syn-3_0_2312 | 5034  | P4HB     |
| Synapse_PPI_Communities | Syn-3_0_2312 | 23193 | GANAB    |
| Synapse_PPI_Communities | Syn-3_0_2312 | 5589  | PRKCSH   |
| Synapse_PPI_Communities | Syn-3_0_2312 | 51602 | NOP58    |
| Synapse_PPI_Communities | Syn-3_0_2312 | 11224 | RPL35    |
| Synapse_PPI_Communities | Syn-3_0_2312 | 7979  | SHFM1    |
| Synapse_PPI_Communities | Syn-3_0_2312 | 10514 | MYBBP1A  |
| Synapse_PPI_Communities | Syn-3_0_2312 | 9770  | RASSF2   |
| Synapse_PPI_Communities | Syn-3_0_2312 | 7846  | TUBA1A   |
| Synapse_PPI_Communities | Syn-3_0_2312 | 27430 | MAT2B    |
| Synapse_PPI_Communities | Syn-3_0_2312 | 83992 | CTTNBP2  |
| Synapse_PPI_Communities | Syn-3_0_2312 | 3646  | EIF3E    |
| Synapse_PPI_Communities | Syn-3_0_2312 | 85440 | DOCK7    |
| Synapse_PPI_Communities | Syn-3_0_2312 | 27044 | SND1     |
| Synapse_PPI_Communities | Syn-3_0_2312 | 29109 | FHOD1    |
| Synapse_PPI_Communities | Syn-3_0_2312 | 60    | ACTB     |
| Synapse_PPI_Communities | Syn-3_0_2312 | 71    | ACTG1    |
| Synapse_PPI_Communities | Syn-3_0_2312 | 5127  | CDK16    |
| Synapse_PPI_Communities | Syn-3_0_2312 | 369   | ARAF     |
| Synapse_PPI_Communities | Syn-3_0_2312 | 65125 | WNK1     |
| Synapse_PPI_Communities | Syn-3_0_2312 | 6232  | RPS27    |
| Synapse_PPI_Communities | Syn-3_0_2312 | 9101  | USP8     |
| Synapse_PPI_Communities | Syn-3_0_2312 | 5230  | PGK1     |
| Synapse_PPI_Communities | Syn-3_0_2312 | 2023  | ENO1     |
| Synapse_PPI_Communities | Syn-3_0_2312 | 7167  | TPI1     |
| Synapse_PPI_Communities | Syn-3_0_2312 | 8661  | EIF3A    |
| Synapse_PPI_Communities | Syn-3_0_2312 | 10093 | ARPC4    |
| Synapse_PPI_Communities | Syn-3_0_2312 | 51100 | SH3GLB1  |
| Synapse_PPI_Communities | Syn-3_0_2312 | 10097 | ACTR2    |
| Synapse_PPI_Communities | Syn-3_0_2312 | 10552 | ARPC1A   |
| Synapse_PPI_Communities | Syn-3_0_2312 | 51002 | TPRKB    |
| Synapse_PPI_Communities | Syn-3_0_2312 | 10096 | ACTR3    |
| Synapse_PPI_Communities | Syn-3_0_2312 | 5566  | PRKACA   |
| Synapse_PPI_Communities | Syn-3_0_2312 | 80755 | AARSD1   |
| Synapse_PPI_Communities | Syn-3_0_2312 | 10576 | CCT2     |
| Synapse_PPI_Communities | Syn-3_0_2312 | 5520  | PPP2R2A  |
| Synapse_PPI_Communities | Syn-3_0_2312 | 6801  | STRN     |
| Synapse_PPI_Communities | Syn-3_0_2312 | 908   | CCT6A    |
| Synapse_PPI_Communities | Syn-3_0_2312 | 23450 | SF3B3    |
| Synapse_PPI_Communities | Syn-3_0_2312 | 7165  | TPD52L2  |
| Synapse_PPI_Communities | Syn-3_0_2312 | 6208  | RPS14    |
| Synapse_PPI_Communities | Syn-3_0_2312 | 23327 | NEDD4L   |
| Synapse_PPI_Communities | Syn-3_0_2312 | 2771  | GNAI2    |
| Synapse_PPI_Communities | Syn-3_0_2312 | 2099  | ESR1     |
| Synapse_PPI_Communities | Syn-3_0_2312 | 2770  | GNAI1    |
| Synapse_PPI_Communities | Syn-3_0_2312 | 2773  | GNAI3    |
| Synapse_PPI_Communities | Syn-3_0_2312 | 59345 | GNB4     |
| Synapse_PPI_Communities | Syn-3_0_2312 | 4543  | MTNR1A   |
| Synapse_PPI_Communities | Syn-3_0_2312 | 154   | ADRB2    |
| Synapse_PPI_Communities | Syn-3_0_2312 | 6209  | RPS15    |
| Synapse_PPI_Communities | Syn-3_0_2312 | 529   | ATP6V1E1 |
| Synapse_PPI_Communities | Syn-3_0_2312 | 525   | ATP6V1B1 |
| Synapse_PPI_Communities | Syn-3_0_2312 | 535   | ATP6VOA1 |
| Synapse_PPI_Communities | Syn-3_0_2312 | 51382 | ATP6V1D  |

|                         |              |        |          |
|-------------------------|--------------|--------|----------|
| Synapse_PPI_Communities | Syn-3_0_2312 | 526    | ATP6V1B2 |
| Synapse_PPI_Communities | Syn-3_0_2312 | 9296   | ATP6V1F  |
| Synapse_PPI_Communities | Syn-3_0_2312 | 51606  | ATP6V1H  |
| Synapse_PPI_Communities | Syn-3_0_2312 | 4486   | MST1R    |
| Synapse_PPI_Communities | Syn-3_0_2312 | 10133  | OPTN     |
| Synapse_PPI_Communities | Syn-3_0_2312 | 10238  | DCAF7    |
| Synapse_PPI_Communities | Syn-3_0_2312 | 6157   | RPL27A   |
| Synapse_PPI_Communities | Syn-3_0_2312 | 2539   | G6PD     |
| Synapse_PPI_Communities | Syn-3_0_2312 | 64924  | SLC30A5  |
| Synapse_PPI_Communities | Syn-3_0_2312 | 6927   | HNF1A    |
| Synapse_PPI_Communities | Syn-3_0_2312 | 6231   | RPS26    |
| Synapse_PPI_Communities | Syn-3_0_2312 | 6455   | SH3GL1   |
| Synapse_PPI_Communities | Syn-3_0_2312 | 10109  | ARPC2    |
| Synapse_PPI_Communities | Syn-3_0_2312 | 813    | CALU     |
| Synapse_PPI_Communities | Syn-3_0_2312 | 5524   | PPP2R4   |
| Synapse_PPI_Communities | Syn-3_0_2312 | 29966  | STRN3    |
| Synapse_PPI_Communities | Syn-3_0_2312 | 5531   | PPP4C    |
| Synapse_PPI_Communities | Syn-3_0_2312 | 3799   | KIF5B    |
| Synapse_PPI_Communities | Syn-3_0_2312 | 89953  | KLC4     |
| Synapse_PPI_Communities | Syn-3_0_2312 | 22948  | CCT5     |
| Synapse_PPI_Communities | Syn-3_0_2312 | 10094  | ARPC3    |
| Synapse_PPI_Communities | Syn-3_0_2312 | 4670   | HNRNPM   |
| Synapse_PPI_Communities | Syn-3_0_2312 | 7531   | YWHAE    |
| Synapse_PPI_Communities | Syn-3_0_2312 | 351    | APP      |
| Synapse_PPI_Communities | Syn-3_0_2312 | 10092  | ARPC5    |
| Synapse_PPI_Communities | Syn-3_0_2312 | 2783   | GNB2     |
| Synapse_PPI_Communities | Syn-3_0_2312 | 6227   | RPS21    |
| Synapse_PPI_Communities | Syn-3_0_2312 | 5747   | PTK2     |
| Synapse_PPI_Communities | Syn-3_0_2312 | 23367  | LARP1    |
| Synapse_PPI_Communities | Syn-3_0_2312 | 1029   | CDKN2A   |
| Synapse_PPI_Communities | Syn-3_0_2312 | 8428   | STK24    |
| Synapse_PPI_Communities | Syn-3_0_2312 | 5521   | PPP2R2B  |
| Synapse_PPI_Communities | Syn-3_0_2312 | 1499   | CTNNB1   |
| Synapse_PPI_Communities | Syn-3_0_2312 | 7345   | UCHL1    |
| Synapse_PPI_Communities | Syn-3_0_2312 | 1956   | EGFR     |
| Synapse_PPI_Communities | Syn-3_0_2312 | 3303   | HSPA1A   |
| Synapse_PPI_Communities | Syn-3_0_2312 | 5062   | PAK2     |
| Synapse_PPI_Communities | Syn-3_0_2312 | 135138 | PACRG    |
| Synapse_PPI_Communities | Syn-3_0_2312 | 4904   | YBX1     |
| Synapse_PPI_Communities | Syn-3_0_2312 | 3313   | HSPA9    |
| Synapse_PPI_Communities | Syn-3_0_2312 | 5580   | PRKCD    |
| Synapse_PPI_Communities | Syn-3_0_2312 | 10399  | GNB2L1   |
| Synapse_PPI_Communities | Syn-3_0_2312 | 7414   | VCL      |
| Synapse_PPI_Communities | Syn-3_0_2312 | 26986  | PABPC1   |
| Synapse_PPI_Communities | Syn-3_0_2312 | 3309   | HSPA5    |
| Synapse_PPI_Communities | Syn-3_0_2312 | 80086  | TUBA4B   |
| Synapse_PPI_Communities | Syn-3_0_2312 | 1173   | AP2M1    |
| Synapse_PPI_Communities | Syn-3_0_2312 | 84790  | TUBA1C   |
| Synapse_PPI_Communities | Syn-3_0_2312 | 5515   | PPP2CA   |
| Synapse_PPI_Communities | Syn-3_0_2312 | 25     | ABL1     |
| Synapse_PPI_Communities | Syn-3_0_2312 | 3383   | ICAM1    |
| Synapse_PPI_Communities | Syn-3_0_2312 | 3476   | IGBP1    |
| Synapse_PPI_Communities | Syn-3_0_2312 | 2932   | GSK3B    |
| Synapse_PPI_Communities | Syn-3_0_2312 | 6622   | SNCA     |
| Synapse_PPI_Communities | Syn-3_0_2312 | 4193   | MDM2     |
| Synapse_PPI_Communities | Syn-3_0_2312 | 5598   | MAPK7    |
| Synapse_PPI_Communities | Syn-3_0_2312 | 6711   | SPTBN1   |
| Synapse_PPI_Communities | Syn-3_0_2312 | 6709   | SPTAN1   |

|                         |              |        |          |
|-------------------------|--------------|--------|----------|
| Synapse_PPI_Communities | Syn-3_0_2312 | 867    | CBL      |
| Synapse_PPI_Communities | Syn-3_0_2312 | 9531   | BAG3     |
| Synapse_PPI_Communities | Syn-3_0_2312 | 4627   | MYH9     |
| Synapse_PPI_Communities | Syn-3_0_2312 | 84959  | UBASH3B  |
| Synapse_PPI_Communities | Syn-3_0_2312 | 1386   | ATF2     |
| Synapse_PPI_Communities | Syn-3_0_2312 | 3014   | H2AFX    |
| Synapse_PPI_Communities | Syn-3_0_2312 | 5684   | PSMA3    |
| Synapse_PPI_Communities | Syn-3_0_2312 | 9657   | IQCB1    |
| Synapse_PPI_Communities | Syn-3_0_2312 | 1994   | ELAVL1   |
| Synapse_PPI_Communities | Syn-3_0_2312 | 408    | ARRB1    |
| Synapse_PPI_Communities | Syn-3_0_2312 | 9924   | PAN2     |
| Synapse_PPI_Communities | Syn-3_0_2312 | 54165  | DCUN1D1  |
| Synapse_PPI_Communities | Syn-3_0_2312 | 1457   | CSNK2A1  |
| Synapse_PPI_Communities | Syn-3_0_2312 | 9775   | EIF4A3   |
| Synapse_PPI_Communities | Syn-3_0_2312 | 1072   | CFL1     |
| Synapse_PPI_Communities | Syn-3_0_2312 | 6464   | SHC1     |
| Synapse_PPI_Communities | Syn-3_0_2312 | 10537  | UBD      |
| Synapse_PPI_Communities | Syn-3_0_2312 | 708    | C1QBP    |
| Synapse_PPI_Communities | Syn-3_0_2312 | 5052   | PRDX1    |
| Synapse_PPI_Communities | Syn-3_0_2312 | 5518   | PPP2R1A  |
| Synapse_PPI_Communities | Syn-3_0_2312 | 302    | ANXA2    |
| Synapse_PPI_Communities | Syn-3_0_2312 | 5071   | PARK2    |
| Synapse_PPI_Communities | Syn-3_0_2312 | 7412   | VCAM1    |
| Synapse_PPI_Communities | Syn-3_0_2312 | 3326   | HSP90AB1 |
| Synapse_PPI_Communities | Syn-3_0_2312 | 51547  | SIRT7    |
| Synapse_PPI_Communities | Syn-3_0_2312 | 8450   | CUL4B    |
| Synapse_PPI_Communities | Syn-3_0_2312 | 4869   | NPM1     |
| Synapse_PPI_Communities | Syn-3_0_2312 | 4843   | NOS2     |
| Synapse_PPI_Communities | Syn-3_0_2312 | 57154  | SMURF1   |
| Synapse_PPI_Communities | Syn-3_0_2312 | 59342  | SCPEP1   |
| Synapse_PPI_Communities | Syn-3_0_2312 | 7317   | UBA1     |
| Synapse_PPI_Communities | Syn-3_0_2312 | 16     | AARS     |
| Synapse_PPI_Communities | Syn-3_0_2312 | 1827   | RCAN1    |
| Synapse_PPI_Communities | Syn-3_0_2312 | 29127  | RACGAP1  |
| Synapse_PPI_Communities | Syn-3_0_2312 | 55103  | RALGPS2  |
| Synapse_PPI_Communities | Syn-3_0_2312 | 8729   | GBF1     |
| Synapse_PPI_Communities | Syn-3_0_2312 | 8674   | VAMP4    |
| Synapse_PPI_Communities | Syn-3_0_2312 | 55690  | PACS1    |
| Synapse_PPI_Communities | Syn-3_0_2312 | 728689 | EIF3CL   |
| Synapse_PPI_Communities | Syn-3_0_2312 | 3308   | HSPA4    |
| Synapse_PPI_Communities | Syn-3_0_2312 | 9555   | H2AFY    |
| Synapse_PPI_Communities | Syn-3_0_2312 | 84365  | MKI67IP  |
| Synapse_PPI_Communities | Syn-3_0_2312 | 6158   | RPL28    |
| Synapse_PPI_Communities | Syn-3_0_2312 | 26354  | GNL3     |
| Synapse_PPI_Communities | Syn-3_0_2312 | 5936   | RBM4     |
| Synapse_PPI_Communities | Syn-3_0_2312 | 6500   | SKP1     |
| Synapse_PPI_Communities | Syn-3_0_2312 | 26273  | FBXO3    |
| Synapse_PPI_Communities | Syn-3_0_2312 | 10487  | CAP1     |
| Synapse_PPI_Communities | Syn-3_0_2312 | 2194   | FASN     |
| Synapse_PPI_Communities | Syn-3_0_2312 | 7170   | TPM3     |
| Synapse_PPI_Communities | Syn-3_0_2312 | 6235   | RPS29    |
| Synapse_PPI_Communities | Syn-3_0_2312 | 2091   | FBL      |
| Synapse_PPI_Communities | Syn-3_0_2312 | 1508   | CTSB     |
| Synapse_PPI_Communities | Syn-3_0_2312 | 9456   | HOMER1   |
| Synapse_PPI_Communities | Syn-3_0_2312 | 6262   | RYR2     |
| Synapse_PPI_Communities | Syn-3_0_2312 | 6261   | RYR1     |
| Synapse_PPI_Communities | Syn-3_0_2312 | 4809   | NHP2L1   |
| Synapse_PPI_Communities | Syn-3_0_2312 | 5861   | RAB1A    |



|                         |              |        |           |
|-------------------------|--------------|--------|-----------|
| Synapse_PPI_Communities | Syn-3_0_2312 | 2923   | PDIA3     |
| Synapse_PPI_Communities | Syn-3_0_2312 | 136319 | MTPN      |
| Synapse_PPI_Communities | Syn-3_0_2312 | 523    | ATP6V1A   |
| Synapse_PPI_Communities | Syn-3_0_2312 | 8664   | EIF3D     |
| Synapse_PPI_Communities | Syn-3_0_2312 | 84206  | MEX3B     |
| Synapse_PPI_Communities | Syn-3_0_2312 | 93144  | RPS10P5   |
| Synapse_PPI_Communities | Syn-3_0_2312 | 9921   | RNF10     |
| Synapse_PPI_Communities | Syn-3_0_2312 | 9368   | SLC9A3R1  |
| Synapse_PPI_Communities | Syn-3_0_2312 | 9520   | NPEPPS    |
| Synapse_PPI_Communities | Syn-3_0_2312 | 26007  | DAK       |
| Synapse_PPI_Communities | Syn-3_0_2312 | 55646  | LYAR      |
| Synapse_PPI_Communities | Syn-3_0_2312 | 4139   | MARK1     |
| Synapse_PPI_Communities | Syn-3_0_2312 | 6737   | TRIM21    |
| Synapse_PPI_Communities | Syn-3_0_2312 | 9156   | EXO1      |
| Synapse_PPI_Communities | Syn-3_0_2312 | 10287  | RGS19     |
| Synapse_PPI_Communities | Syn-3_0_2312 | 1999   | ELF3      |
| Synapse_PPI_Communities | Syn-3_0_2312 | 4839   | NOP2      |
| Synapse_PPI_Communities | Syn-3_0_2312 | 23332  | CLASP1    |
| Synapse_PPI_Communities | Syn-3_0_2312 | 80153  | EDC3      |
| Synapse_PPI_Communities | Syn-3_0_2312 | 55095  | SAMD4B    |
| Synapse_PPI_Communities | Syn-3_0_2312 | 26064  | RAI14     |
| Synapse_PPI_Communities | Syn-3_0_2312 | 51386  | EIF3L     |
| Synapse_PPI_Communities | Syn-3_0_2312 | 3018   | HIST1H2BB |
| Synapse_PPI_Communities | Syn-3_0_2312 | 7280   | TUBB2A    |
| Synapse_PPI_Communities | Syn-3_0_2312 | 55968  | NSFL1C    |
| Synapse_PPI_Communities | Syn-3_0_2312 | 3098   | HK1       |
| Synapse_PPI_Communities | Syn-3_0_2312 | 9373   | PLAA      |
| Synapse_PPI_Communities | Syn-3_0_2312 | 29968  | PSAT1     |
| Synapse_PPI_Communities | Syn-3_0_2312 | 1268   | CNR1      |
| Synapse_PPI_Communities | Syn-3_0_2312 | 6184   | RPN1      |
| Synapse_PPI_Communities | Syn-3_0_2312 | 6651   | SON       |
| Synapse_PPI_Communities | Syn-3_0_2312 | 4905   | NSF       |
| Synapse_PPI_Communities | Syn-3_0_2312 | 8417   | STX7      |
| Synapse_PPI_Communities | Syn-3_0_2312 | 10228  | STX6      |
| Synapse_PPI_Communities | Syn-3_0_2312 | 8773   | SNAP23    |
| Synapse_PPI_Communities | Syn-3_0_2312 | 4113   | MAGEB2    |
| Synapse_PPI_Communities | Syn-3_0_2312 | 23020  | SNRNP200  |
| Synapse_PPI_Communities | Syn-3_0_2312 | 3106   | HLA-B     |
| Synapse_PPI_Communities | Syn-3_0_2312 | 9522   | SCAMP1    |
| Synapse_PPI_Communities | Syn-3_0_2312 | 10066  | SCAMP2    |
| Synapse_PPI_Communities | Syn-3_0_2312 | 7410   | VAV2      |
| Synapse_PPI_Communities | Syn-3_0_2312 | 9414   | TJP2      |
| Synapse_PPI_Communities | Syn-3_0_2312 | 54974  | THG1L     |
| Synapse_PPI_Communities | Syn-3_0_2312 | 64407  | RGS18     |
| Synapse_PPI_Communities | Syn-3_0_2312 | 3760   | KCNJ3     |
| Synapse_PPI_Communities | Syn-3_0_2312 | 2782   | GNB1      |
| Synapse_PPI_Communities | Syn-3_0_2312 | 4799   | NFX1      |
| Synapse_PPI_Communities | Syn-3_0_2312 | 6897   | TARS      |
| Synapse_PPI_Communities | Syn-3_0_2312 | 11345  | GABARAPL2 |
| Synapse_PPI_Communities | Syn-3_0_2312 | 2631   | GBAS      |
| Synapse_PPI_Communities | Syn-3_0_2312 | 8508   | NIPSNAP1  |
| Synapse_PPI_Communities | Syn-3_0_2312 | 23710  | GABARAPL1 |
| Synapse_PPI_Communities | Syn-3_0_2312 | 4629   | MYH11     |
| Synapse_PPI_Communities | Syn-3_0_2312 | 4924   | NUCB1     |
| Synapse_PPI_Communities | Syn-3_0_2312 | 10693  | CCT6B     |
| Synapse_PPI_Communities | Syn-3_0_2312 | 54606  | DDX56     |
| Synapse_PPI_Communities | Syn-3_0_2312 | 64092  | SAMSN1    |
| Synapse_PPI_Communities | Syn-3_0_2312 | 5687   | PSMA6     |

|                         |              |        |          |
|-------------------------|--------------|--------|----------|
| Synapse_PPI_Communities | Syn-3_0_2312 | 2017   | CTTN     |
| Synapse_PPI_Communities | Syn-3_0_2312 | 7456   | WIPF1    |
| Synapse_PPI_Communities | Syn-3_0_2312 | 2664   | GDI1     |
| Synapse_PPI_Communities | Syn-3_0_2312 | 9805   | SCRN1    |
| Synapse_PPI_Communities | Syn-3_0_2312 | 90933  | TRIM41   |
| Synapse_PPI_Communities | Syn-3_0_2312 | 4174   | MCM5     |
| Synapse_PPI_Communities | Syn-3_0_2312 | 6154   | RPL26    |
| Synapse_PPI_Communities | Syn-3_0_2312 | 7278   | TUBA3C   |
| Synapse_PPI_Communities | Syn-3_0_2312 | 5664   | PSEN2    |
| Synapse_PPI_Communities | Syn-3_0_2312 | 54536  | EXOC6    |
| Synapse_PPI_Communities | Syn-3_0_2312 | 4846   | NOS3     |
| Synapse_PPI_Communities | Syn-3_0_2312 | 22954  | TRIM32   |
| Synapse_PPI_Communities | Syn-3_0_2312 | 23385  | NCSTN    |
| Synapse_PPI_Communities | Syn-3_0_2312 | 3550   | IK       |
| Synapse_PPI_Communities | Syn-3_0_2312 | 26227  | PHGDH    |
| Synapse_PPI_Communities | Syn-3_0_2312 | 3310   | HSPA6    |
| Synapse_PPI_Communities | Syn-3_0_2312 | 4140   | MARK3    |
| Synapse_PPI_Communities | Syn-3_0_2312 | 1152   | CKB      |
| Synapse_PPI_Communities | Syn-3_0_2312 | 54187  | NANS     |
| Synapse_PPI_Communities | Syn-3_0_2312 | 5585   | PKN1     |
| Synapse_PPI_Communities | Syn-3_0_2312 | 84305  | WIBG     |
| Synapse_PPI_Communities | Syn-3_0_2312 | 309    | ANXA6    |
| Synapse_PPI_Communities | Syn-3_0_2312 | 3417   | IDH1     |
| Synapse_PPI_Communities | Syn-3_0_2312 | 7328   | UBE2H    |
| Synapse_PPI_Communities | Syn-3_0_2312 | 2805   | GOT1     |
| Synapse_PPI_Communities | Syn-3_0_2312 | 10312  | TCIRG1   |
| Synapse_PPI_Communities | Syn-3_0_2312 | 57180  | ACTR3B   |
| Synapse_PPI_Communities | Syn-3_0_2312 | 23313  | KIAA0930 |
| Synapse_PPI_Communities | Syn-3_0_2312 | 22827  | PUF60    |
| Synapse_PPI_Communities | Syn-3_0_2312 | 9978   | RBX1     |
| Synapse_PPI_Communities | Syn-3_0_2312 | 5998   | RGS3     |
| Synapse_PPI_Communities | Syn-3_0_2312 | 26059  | ERC2     |
| Synapse_PPI_Communities | Syn-3_0_2312 | 28964  | GIT1     |
| Synapse_PPI_Communities | Syn-3_0_2312 | 8541   | PPFIA3   |
| Synapse_PPI_Communities | Syn-3_0_2312 | 5879   | RAC1     |
| Synapse_PPI_Communities | Syn-3_0_2312 | 998    | CDC42    |
| Synapse_PPI_Communities | Syn-3_0_2312 | 8506   | CNTNAP1  |
| Synapse_PPI_Communities | Syn-3_0_2312 | 4899   | NRF1     |
| Synapse_PPI_Communities | Syn-3_0_2312 | 10053  | AP1M2    |
| Synapse_PPI_Communities | Syn-3_0_2312 | 9545   | RAB3D    |
| Synapse_PPI_Communities | Syn-3_0_2312 | 22983  | MAST1    |
| Synapse_PPI_Communities | Syn-3_0_2312 | 55699  | IARS2    |
| Synapse_PPI_Communities | Syn-3_0_2312 | 5864   | RAB3A    |
| Synapse_PPI_Communities | Syn-3_0_2312 | 51295  | ECSIT    |
| Synapse_PPI_Communities | Syn-3_0_2312 | 7001   | PRDX2    |
| Synapse_PPI_Communities | Syn-3_0_2312 | 5910   | RAP1GDS1 |
| Synapse_PPI_Communities | Syn-3_0_2312 | 5049   | PAFAH1B2 |
| Synapse_PPI_Communities | Syn-3_0_2312 | 2937   | GSS      |
| Synapse_PPI_Communities | Syn-3_0_2312 | 8499   | PPFIA2   |
| Synapse_PPI_Communities | Syn-3_0_2312 | 4507   | MTAP     |
| Synapse_PPI_Communities | Syn-3_0_2312 | 118    | ADD1     |
| Synapse_PPI_Communities | Syn-3_0_2312 | 6710   | SPTB     |
| Synapse_PPI_Communities | Syn-3_0_2312 | 4673   | NAP1L1   |
| Synapse_PPI_Communities | Syn-3_0_2312 | 261726 | TIPRL    |
| Synapse_PPI_Communities | Syn-3_0_2312 | 3621   | ING1     |
| Synapse_PPI_Communities | Syn-3_0_2312 | 28960  | DCPS     |
| Synapse_PPI_Communities | Syn-3_0_2312 | 6004   | RGS16    |
| Synapse_PPI_Communities | Syn-3_0_2312 | 821    | CANX     |

|                         |              |        |         |
|-------------------------|--------------|--------|---------|
| Synapse_PPI_Communities | Syn-3_0_2312 | 79068  | FTO     |
| Synapse_PPI_Communities | Syn-3_0_2312 | 7248   | TSC1    |
| Synapse_PPI_Communities | Syn-3_0_2312 | 1676   | DFFA    |
| Synapse_PPI_Communities | Syn-3_0_2312 | 5128   | CDK17   |
| Synapse_PPI_Communities | Syn-3_0_2312 | 10979  | FERMT2  |
| Synapse_PPI_Communities | Syn-3_0_2312 | 9967   | THRAP3  |
| Synapse_PPI_Communities | Syn-3_0_2312 | 5686   | PSMA5   |
| Synapse_PPI_Communities | Syn-3_0_2312 | 51678  | MPP6    |
| Synapse_PPI_Communities | Syn-3_0_2312 | 3768   | KCNJ12  |
| Synapse_PPI_Communities | Syn-3_0_2312 | 8825   | LIN7A   |
| Synapse_PPI_Communities | Syn-3_0_2312 | 10497  | UNC13B  |
| Synapse_PPI_Communities | Syn-3_0_2312 | 6844   | VAMP2   |
| Synapse_PPI_Communities | Syn-3_0_2312 | 112755 | STX1B   |
| Synapse_PPI_Communities | Syn-3_0_2312 | 824    | CAPN2   |
| Synapse_PPI_Communities | Syn-3_0_2312 | 8490   | RGS5    |
| Synapse_PPI_Communities | Syn-3_0_2312 | 2778   | GNAS    |
| Synapse_PPI_Communities | Syn-3_0_2312 | 6915   | TBXA2R  |
| Synapse_PPI_Communities | Syn-3_0_2312 | 2767   | GNA11   |
| Synapse_PPI_Communities | Syn-3_0_2312 | 55054  | ATG16L1 |
| Synapse_PPI_Communities | Syn-3_0_2312 | 11034  | DSTN    |
| Synapse_PPI_Communities | Syn-3_0_2312 | 55611  | OTUB1   |
| Synapse_PPI_Communities | Syn-3_0_2312 | 4093   | SMAD9   |
| Synapse_PPI_Communities | Syn-3_0_2312 | 5663   | PSEN1   |
| Synapse_PPI_Communities | Syn-3_0_2312 | 2      | A2M     |
| Synapse_PPI_Communities | Syn-3_0_2312 | 10458  | BAIAP2  |
| Synapse_PPI_Communities | Syn-3_0_2312 | 6733   | SRPK2   |
| Synapse_PPI_Communities | Syn-3_0_2312 | 55970  | GNG12   |
| Synapse_PPI_Communities | Syn-3_0_2312 | 10211  | FLOT1   |
| Synapse_PPI_Communities | Syn-3_0_2312 | 2319   | FLOT2   |
| Synapse_PPI_Communities | Syn-3_0_2312 | 60491  | NIF3L1  |
| Synapse_PPI_Communities | Syn-3_0_2312 | 11344  | TWF2    |
| Synapse_PPI_Communities | Syn-3_0_2312 | 8573   | CASK    |
| Synapse_PPI_Communities | Syn-3_0_2312 | 493    | ATP2B4  |
| Synapse_PPI_Communities | Syn-3_0_2312 | 55914  | ERBB2IP |
| Synapse_PPI_Communities | Syn-3_0_2312 | 140545 | RNF32   |
| Synapse_PPI_Communities | Syn-3_0_2312 | 348    | APOE    |
| Synapse_PPI_Communities | Syn-3_0_2312 | 5710   | PSMD4   |
| Synapse_PPI_Communities | Syn-3_0_2312 | 1740   | DLG2    |
| Synapse_PPI_Communities | Syn-3_0_2312 | 2903   | GRIN2A  |
| Synapse_PPI_Communities | Syn-3_0_2312 | 9229   | DLGAP1  |
| Synapse_PPI_Communities | Syn-3_0_2312 | 10298  | PAK4    |
| Synapse_PPI_Communities | Syn-3_0_2312 | 9343   | EFTUD2  |
| Synapse_PPI_Communities | Syn-3_0_2312 | 55844  | PPP2R2D |
| Synapse_PPI_Communities | Syn-3_0_2312 | 11336  | EXOC3   |
| Synapse_PPI_Communities | Syn-3_0_2312 | 55770  | EXOC2   |
| Synapse_PPI_Communities | Syn-3_0_2312 | 4644   | MYO5A   |
| Synapse_PPI_Communities | Syn-3_0_2312 | 55748  | CNDP2   |
| Synapse_PPI_Communities | Syn-3_0_2312 | 7965   | AIMP2   |
| Synapse_PPI_Communities | Syn-3_0_2312 | 6161   | RPL32   |
| Synapse_PPI_Communities | Syn-3_0_2312 | 26259  | FBXW8   |
| Synapse_PPI_Communities | Syn-3_0_2312 | 81873  | ARPC5L  |
| Synapse_PPI_Communities | Syn-3_0_2312 | 7128   | TNFAIP3 |
| Synapse_PPI_Communities | Syn-3_0_2312 | 80335  | WDR82   |
| Synapse_PPI_Communities | Syn-3_0_2312 | 10095  | ARPC1B  |
| Synapse_PPI_Communities | Syn-3_0_2312 | 10915  | TCERG1  |
| Synapse_PPI_Communities | Syn-3_0_2312 | 56061  | UBFD1   |
| Synapse_PPI_Communities | Syn-3_0_2312 | 6612   | SUMO3   |
| Synapse_PPI_Communities | Syn-3_0_2312 | 1742   | DLG4    |

|                         |              |        |          |
|-------------------------|--------------|--------|----------|
| Synapse_PPI_Communities | Syn-3_0_2312 | 23265  | EXOC7    |
| Synapse_PPI_Communities | Syn-3_0_2312 | 10640  | EXOC5    |
| Synapse_PPI_Communities | Syn-3_0_2312 | 5868   | RAB5A    |
| Synapse_PPI_Communities | Syn-3_0_2312 | 5867   | RAB4A    |
| Synapse_PPI_Communities | Syn-3_0_2312 | 79874  | RABEP2   |
| Synapse_PPI_Communities | Syn-3_0_2312 | 10413  | YAP1     |
| Synapse_PPI_Communities | Syn-3_0_2312 | 1778   | DYNC1H1  |
| Synapse_PPI_Communities | Syn-3_0_2312 | 2316   | FLNA     |
| Synapse_PPI_Communities | Syn-3_0_2312 | 840    | CASP7    |
| Synapse_PPI_Communities | Syn-3_0_2312 | 1213   | CLTC     |
| Synapse_PPI_Communities | Syn-3_0_2312 | 30011  | SH3KBP1  |
| Synapse_PPI_Communities | Syn-3_0_2312 | 8867   | SYNJ1    |
| Synapse_PPI_Communities | Syn-3_0_2312 | 7337   | UBE3A    |
| Synapse_PPI_Communities | Syn-3_0_2312 | 5522   | PPP2R2C  |
| Synapse_PPI_Communities | Syn-3_0_2312 | 5058   | PAK1     |
| Synapse_PPI_Communities | Syn-3_0_2312 | 161    | AP2A2    |
| Synapse_PPI_Communities | Syn-3_0_2312 | 160    | AP2A1    |
| Synapse_PPI_Communities | Syn-3_0_2312 | 273    | AMPH     |
| Synapse_PPI_Communities | Syn-3_0_2312 | 274    | BIN1     |
| Synapse_PPI_Communities | Syn-3_0_2312 | 9221   | NOLC1    |
| Synapse_PPI_Communities | Syn-3_0_2312 | 3191   | HNRNPL   |
| Synapse_PPI_Communities | Syn-3_0_2312 | 8471   | IRS4     |
| Synapse_PPI_Communities | Syn-3_0_2312 | 8496   | PPFIBP1  |
| Synapse_PPI_Communities | Syn-3_0_2312 | 2869   | GRK5     |
| Synapse_PPI_Communities | Syn-3_0_2312 | 1175   | AP2S1    |
| Synapse_PPI_Communities | Syn-3_0_2312 | 4301   | MLLT4    |
| Synapse_PPI_Communities | Syn-3_0_2312 | 8775   | NAPA     |
| Synapse_PPI_Communities | Syn-3_0_2312 | 6811   | STX5     |
| Synapse_PPI_Communities | Syn-3_0_2312 | 6616   | SNAP25   |
| Synapse_PPI_Communities | Syn-3_0_2312 | 2977   | GUCY1A2  |
| Synapse_PPI_Communities | Syn-3_0_2312 | 1975   | EIF4B    |
| Synapse_PPI_Communities | Syn-3_0_2312 | 140735 | DYNLL2   |
| Synapse_PPI_Communities | Syn-3_0_2312 | 6810   | STX4     |
| Synapse_PPI_Communities | Syn-3_0_2312 | 9342   | SNAP29   |
| Synapse_PPI_Communities | Syn-3_0_2312 | 6845   | VAMP7    |
| Synapse_PPI_Communities | Syn-3_0_2312 | 23673  | STX12    |
| Synapse_PPI_Communities | Syn-3_0_2312 | 5567   | PRKACB   |
| Synapse_PPI_Communities | Syn-3_0_2312 | 9601   | PDIA4    |
| Synapse_PPI_Communities | Syn-3_0_2312 | 695    | BTK      |
| Synapse_PPI_Communities | Syn-3_0_2312 | 2037   | EPB41L2  |
| Synapse_PPI_Communities | Syn-3_0_2312 | 149371 | EXOC8    |
| Synapse_PPI_Communities | Syn-3_0_2312 | 6206   | RPS12    |
| Synapse_PPI_Communities | Syn-3_0_2312 | 10541  | ANP32B   |
| Synapse_PPI_Communities | Syn-3_0_2312 | 5289   | PIK3C3   |
| Synapse_PPI_Communities | Syn-3_0_2312 | 1665   | DHX15    |
| Synapse_PPI_Communities | Syn-3_0_2312 | 10155  | TRIM28   |
| Synapse_PPI_Communities | Syn-3_0_2312 | 5594   | MAPK1    |
| Synapse_PPI_Communities | Syn-3_0_2312 | 1653   | DDX1     |
| Synapse_PPI_Communities | Syn-3_0_2312 | 64837  | KLC2     |
| Synapse_PPI_Communities | Syn-3_0_2312 | 8161   | COIL     |
| Synapse_PPI_Communities | Syn-3_0_2312 | 1203   | CLN5     |
| Synapse_PPI_Communities | Syn-3_0_2312 | 528    | ATP6V1C1 |
| Synapse_PPI_Communities | Syn-3_0_2312 | 3998   | LMAN1    |
| Synapse_PPI_Communities | Syn-3_0_2312 | 2197   | FAU      |
| Synapse_PPI_Communities | Syn-3_0_2312 | 8533   | COPS3    |
| Synapse_PPI_Communities | Syn-3_0_2312 | 6204   | RPS10    |
| Synapse_PPI_Communities | Syn-3_0_2312 | 8655   | DYNLL1   |
| Synapse_PPI_Communities | Syn-3_0_2312 | 4130   | MAP1A    |

|                         |              |        |          |
|-------------------------|--------------|--------|----------|
| Synapse_PPI_Communities | Syn-3_0_2312 | 9341   | VAMP3    |
| Synapse_PPI_Communities | Syn-3_0_2312 | 2054   | STX2     |
| Synapse_PPI_Communities | Syn-3_0_2312 | 8673   | VAMP8    |
| Synapse_PPI_Communities | Syn-3_0_2312 | 6857   | SYT1     |
| Synapse_PPI_Communities | Syn-3_0_2312 | 6809   | STX3     |
| Synapse_PPI_Communities | Syn-3_0_2312 | 495    | ATP4A    |
| Synapse_PPI_Communities | Syn-3_0_2312 | 2768   | GNA12    |
| Synapse_PPI_Communities | Syn-3_0_2312 | 5579   | PRKCB    |
| Synapse_PPI_Communities | Syn-3_0_2312 | 3875   | KRT18    |
| Synapse_PPI_Communities | Syn-3_0_2312 | 1027   | CDKN1B   |
| Synapse_PPI_Communities | Syn-3_0_2312 | 5621   | PRNP     |
| Synapse_PPI_Communities | Syn-3_0_2312 | 23411  | SIRT1    |
| Synapse_PPI_Communities | Syn-3_0_2312 | 10130  | PDIA6    |
| Synapse_PPI_Communities | Syn-3_0_2312 | 871    | SERPINH1 |
| Synapse_PPI_Communities | Syn-3_0_2312 | 2665   | GDI2     |
| Synapse_PPI_Communities | Syn-3_0_2312 | 984    | CDK11B   |
| Synapse_PPI_Communities | Syn-3_0_2312 | 5226   | PGD      |
| Synapse_PPI_Communities | Syn-3_0_2312 | 3939   | LDHA     |
| Synapse_PPI_Communities | Syn-3_0_2312 | 51631  | LUC7L2   |
| Synapse_PPI_Communities | Syn-3_0_2312 | 26135  | SERBP1   |
| Synapse_PPI_Communities | Syn-3_0_2312 | 4214   | MAP3K1   |
| Synapse_PPI_Communities | Syn-3_0_2312 | 6742   | SSBP1    |
| Synapse_PPI_Communities | Syn-3_0_2312 | 817    | CAMK2D   |
| Synapse_PPI_Communities | Syn-3_0_2312 | 64326  | RFWD2    |
| Synapse_PPI_Communities | Syn-3_0_2312 | 8517   | IKBKG    |
| Synapse_PPI_Communities | Syn-3_0_2312 | 81567  | TXNDC5   |
| Synapse_PPI_Communities | Syn-3_0_2312 | 5894   | RAF1     |
| Synapse_PPI_Communities | Syn-3_0_2312 | 3305   | HSPA1L   |
| Synapse_PPI_Communities | Syn-3_0_2312 | 653333 | FAM86B2  |
| Synapse_PPI_Communities | Syn-3_0_2312 | 11198  | SUPT16H  |
| Synapse_PPI_Communities | Syn-3_0_2312 | 54888  | NSUN2    |
| Synapse_PPI_Communities | Syn-3_0_2312 | 5886   | RAD23A   |
| Synapse_PPI_Communities | Syn-3_0_2312 | 2010   | EMD      |
| Synapse_PPI_Communities | Syn-3_0_2312 | 1973   | EIF4A1   |
| Synapse_PPI_Communities | Syn-3_0_2312 | 801    | CALM1    |
| Synapse_PPI_Communities | Syn-3_0_2312 | 4609   | MYC      |
| Synapse_PPI_Communities | Syn-3_0_2312 | 818    | CAMK2G   |
| Synapse_PPI_Communities | Syn-3_0_2312 | 51035  | UBXN1    |
| Synapse_PPI_Communities | Syn-3_0_2312 | 1983   | EIF5     |
| Synapse_PPI_Communities | Syn-3_0_2312 | 5584   | PRKCI    |
| Synapse_PPI_Communities | Syn-3_0_2312 | 142    | PARP1    |
| Synapse_PPI_Communities | Syn-3_0_2312 | 3304   | HSPA1B   |
| Synapse_PPI_Communities | Syn-3_0_2312 | 6428   | SRSF3    |
| Synapse_PPI_Communities | Syn-3_0_2312 | 1244   | ABCC2    |
| Synapse_PPI_Communities | Syn-3_0_2312 | 8301   | PICALM   |
| Synapse_PPI_Communities | Syn-3_0_2312 | 1780   | DYNC111  |
| Synapse_PPI_Communities | Syn-3_0_2312 | 10381  | TUBB3    |
| Synapse_PPI_Communities | Syn-3_0_2312 | 310    | ANXA7    |
| Synapse_PPI_Communities | Syn-3_0_2312 | 7334   | UBE2N    |
| Synapse_PPI_Communities | Syn-3_0_2312 | 1207   | CLNS1A   |
| Synapse_PPI_Communities | Syn-3_0_2312 | 25843  | MOB4     |
| Synapse_PPI_Communities | Syn-3_0_2312 | 3800   | KIF5C    |
| Synapse_PPI_Communities | Syn-3_0_2312 | 3692   | EIF6     |
| Synapse_PPI_Communities | Syn-3_0_2312 | 6513   | SLC2A1   |
| Synapse_PPI_Communities | Syn-3_0_2312 | 1434   | CSE1L    |
| Synapse_PPI_Communities | Syn-3_0_2312 | 23095  | KIF1B    |
| Synapse_PPI_Communities | Syn-3_0_2312 | 8766   | RAB11A   |
| Synapse_PPI_Communities | Syn-3_0_2312 | 9230   | RAB11B   |

|                         |              |        |          |
|-------------------------|--------------|--------|----------|
| Synapse_PPI_Communities | Syn-3_0_2312 | 4628   | MYH10    |
| Synapse_PPI_Communities | Syn-3_0_2312 | 7879   | RAB7A    |
| Synapse_PPI_Communities | Syn-3_0_2312 | 220988 | HNRNPA3  |
| Synapse_PPI_Communities | Syn-3_0_2312 | 6468   | FBXW4    |
| Synapse_PPI_Communities | Syn-3_0_2312 | 6426   | SRSF1    |
| Synapse_PPI_Communities | Syn-3_0_2312 | 3848   | KRT1     |
| Synapse_PPI_Communities | Syn-3_0_2312 | 92342  | METTTL18 |
| Synapse_PPI_Communities | Syn-3_0_2312 | 5223   | PGAM1    |
| Synapse_PPI_Communities | Syn-3_0_2312 | 4088   | SMAD3    |
| Synapse_PPI_Communities | Syn-3_0_2312 | 4851   | NOTCH1   |
| Synapse_PPI_Communities | Syn-3_0_2312 | 3831   | KLC1     |
| Synapse_PPI_Communities | Syn-3_0_2312 | 7416   | VDAC1    |
| Synapse_PPI_Communities | Syn-3_0_2312 | 5581   | PRKCE    |
| Synapse_PPI_Communities | Syn-3_0_2312 | 3945   | LDHB     |
| Synapse_PPI_Communities | Syn-3_0_2312 | 1025   | CDK9     |
| Synapse_PPI_Communities | Syn-3_0_2312 | 10787  | NCKAP1   |
| Synapse_PPI_Communities | Syn-3_0_2312 | 3192   | HNRNPU   |
| Synapse_PPI_Communities | Syn-3_0_2312 | 3920   | LAMP2    |
| Synapse_PPI_Communities | Syn-3_0_2312 | 7284   | TUFM     |
| Synapse_PPI_Communities | Syn-3_0_2312 | 3728   | JUP      |
| Synapse_PPI_Communities | Syn-3_0_2312 | 1000   | CDH2     |
| Synapse_PPI_Communities | Syn-3_0_2312 | 51762  | RAB8B    |
| Synapse_PPI_Communities | Syn-3_0_2312 | 1432   | MAPK14   |
| Synapse_PPI_Communities | Syn-3_0_2312 | 1655   | DDX5     |
| Synapse_PPI_Communities | Syn-3_0_2312 | 3187   | HNRNPH1  |
| Synapse_PPI_Communities | Syn-3_0_2312 | 5296   | PIK3R2   |
| Synapse_PPI_Communities | Syn-3_0_2312 | 81876  | RAB1B    |
| Synapse_PPI_Communities | Syn-3_0_2312 | 10376  | TUBA1B   |
| Synapse_PPI_Communities | Syn-3_0_2312 | 4218   | RAB8A    |
| Synapse_PPI_Communities | Syn-3_0_2312 | 5604   | MAP2K1   |
| Synapse_PPI_Communities | Syn-3_0_2312 | 9218   | VAPA     |
| Synapse_PPI_Communities | Syn-3_0_2312 | 7419   | VDAC3    |
| Synapse_PPI_Communities | Syn-3_0_2312 | 5591   | PRKDC    |
| Synapse_PPI_Communities | Syn-3_0_2312 | 8878   | SQSTM1   |
| Synapse_PPI_Communities | Syn-3_0_2312 | 5111   | PCNA     |
| Synapse_PPI_Communities | Syn-3_0_2312 | 1660   | DHX9     |
| Synapse_PPI_Communities | Syn-3_0_2312 | 5478   | PPIA     |
| Synapse_PPI_Communities | Syn-3_0_2312 | 3178   | HNRNPA1  |
| Synapse_PPI_Communities | Syn-3_0_2312 | 826    | CAPNS1   |
| Synapse_PPI_Communities | Syn-3_0_2312 | 5048   | PAFAH1B1 |
| Synapse_PPI_Communities | Syn-3_0_2312 | 5590   | PRKCZ    |
| Synapse_PPI_Communities | Syn-3_0_2312 | 5683   | PSMA2    |
| Synapse_PPI_Communities | Syn-3_0_2312 | 10857  | PGRMC1   |
| Synapse_PPI_Communities | Syn-3_0_2312 | 10134  | BCAP31   |
| Synapse_PPI_Communities | Syn-3_0_2312 | 6117   | RPA1     |
| Synapse_PPI_Communities | Syn-3_0_2312 | 6118   | RPA2     |
| Synapse_PPI_Communities | Syn-3_0_2312 | 6119   | RPA3     |
| Synapse_PPI_Communities | Syn-3_0_2312 | 23524  | SRRM2    |
| Synapse_PPI_Communities | Syn-3_0_2312 | 8826   | IQGAP1   |
| Synapse_PPI_Communities | Syn-3_0_2312 | 1488   | CTBP2    |
| Synapse_PPI_Communities | Syn-3_0_2312 | 1937   | EEF1G    |
| Synapse_PPI_Communities | Syn-3_0_2312 | 7431   | VIM      |
| Synapse_PPI_Communities | Syn-3_0_2312 | 10383  | TUBB4B   |
| Synapse_PPI_Communities | Syn-3_0_2312 | 1500   | CTNND1   |
| Synapse_PPI_Communities | Syn-3_0_2312 | 1495   | CTNNA1   |
| Synapse_PPI_Communities | Syn-3_0_2312 | 207    | AKT1     |
| Synapse_PPI_Communities | Syn-3_0_2312 | 3064   | HTT      |
| Synapse_PPI_Communities | Syn-3_0_2312 | 1639   | DCTN1    |

|                         |              |        |          |
|-------------------------|--------------|--------|----------|
| Synapse_PPI_Communities | Syn-3_0_2312 | 10540  | DCTN2    |
| Synapse_PPI_Communities | Syn-3_0_2312 | 3329   | HSPD1    |
| Synapse_PPI_Communities | Syn-3_0_2312 | 999    | CDH1     |
| Synapse_PPI_Communities | Syn-3_0_2312 | 6714   | SRC      |
| Synapse_PPI_Communities | Syn-3_0_2312 | 1400   | CRMP1    |
| Synapse_PPI_Communities | Syn-3_0_2312 | 7052   | TGM2     |
| Synapse_PPI_Communities | Syn-3_0_2312 | 51377  | UCHL5    |
| Synapse_PPI_Communities | Syn-3_0_2312 | 5536   | PPP5C    |
| Synapse_PPI_Communities | Syn-3_0_2312 | 10963  | STIP1    |
| Synapse_PPI_Communities | Syn-3_0_2312 | 5595   | MAPK3    |
| Synapse_PPI_Communities | Syn-3_0_2312 | 857    | CAV1     |
| Synapse_PPI_Communities | Syn-3_0_2312 | 9146   | HGS      |
| Synapse_PPI_Communities | Syn-3_0_2312 | 4137   | MAPT     |
| Synapse_PPI_Communities | Syn-3_0_2312 | 120892 | LRRK2    |
| Synapse_PPI_Communities | Syn-3_0_2312 | 1020   | CDK5     |
| Synapse_PPI_Communities | Syn-3_0_2312 | 8841   | HDAC3    |
| Synapse_PPI_Communities | Syn-3_0_2312 | 506    | ATP5B    |
| Synapse_PPI_Communities | Syn-3_0_2312 | 5245   | PHB      |
| Synapse_PPI_Communities | Syn-3_0_2312 | 7157   | TP53     |
| Synapse_PPI_Communities | Syn-3_0_2312 | 3190   | HNRNPK   |
| Synapse_PPI_Communities | Syn-3_0_2312 | 1398   | CRK      |
| Synapse_PPI_Communities | Syn-3_0_2312 | 51552  | RAB14    |
| Synapse_PPI_Communities | Syn-3_0_2312 | 51741  | WWOX     |
| Synapse_PPI_Communities | Syn-3_0_2312 | 988    | CDC5L    |
| Synapse_PPI_Communities | Syn-3_0_2312 | 920    | CD4      |
| Synapse_PPI_Communities | Syn-3_0_2312 | 8451   | CUL4A    |
| Synapse_PPI_Communities | Syn-3_0_2312 | 5195   | PEX14    |
| Synapse_PPI_Communities | Syn-3_0_2312 | 3184   | HNRNPD   |
| Synapse_PPI_Communities | Syn-3_0_2312 | 1460   | CSNK2B   |
| Synapse_PPI_Communities | Syn-3_0_2312 | 1026   | CDKN1A   |
| Synapse_PPI_Communities | Syn-3_0_2312 | 26146  | TRAF3IP1 |
| Synapse_PPI_Communities | Syn-3_0_2312 | 5479   | PPIB     |
| Synapse_PPI_Communities | Syn-3_0_2312 | 387082 | SUMO4    |
| Synapse_PPI_Communities | Syn-3_0_2312 | 1627   | DBN1     |
| Synapse_PPI_Communities | Syn-3_0_2312 | 4116   | MAGOH    |
| Synapse_PPI_Communities | Syn-3_0_2312 | 5501   | PPP1CC   |
| Synapse_PPI_Communities | Syn-3_0_2312 | 7086   | TKT      |
| Synapse_PPI_Communities | Syn-3_0_2312 | 498    | ATP5A1   |
| Synapse_PPI_Communities | Syn-3_0_2312 | 5893   | RAD52    |
| Synapse_PPI_Communities | Syn-3_0_2312 | 56257  | MEPCE    |
| Synapse_PPI_Communities | Syn-3_0_2312 | 5216   | PFN1     |
| Synapse_PPI_Communities | Syn-3_0_2312 | 3611   | ILK      |
| Synapse_PPI_Communities | Syn-3_0_2312 | 10397  | NDRG1    |
| Synapse_PPI_Communities | Syn-3_0_2312 | 301    | ANXA1    |
| Synapse_PPI_Communities | Syn-3_0_2312 | 25895  | METTL21B |
| Synapse_PPI_Communities | Syn-3_0_2312 | 3301   | DNAJA1   |
| Synapse_PPI_Communities | Syn-3_0_2312 | 87     | ACTN1    |
| Synapse_PPI_Communities | Syn-3_0_2312 | 7295   | TXN      |
| Synapse_PPI_Communities | Syn-3_0_2312 | 10980  | COPS6    |
| Synapse_PPI_Communities | Syn-3_0_2312 | 7428   | VHL      |
| Synapse_PPI_Communities | Syn-3_0_2312 | 26260  | FBXO25   |
| Synapse_PPI_Communities | Syn-3_0_2312 | 8726   | EED      |
| Synapse_PPI_Communities | Syn-3_0_2312 | 5885   | RAD21    |
| Synapse_PPI_Communities | Syn-3_0_2312 | 9636   | ISG15    |
| Synapse_PPI_Communities | Syn-3_0_2312 | 3837   | KPNB1    |
| Synapse_PPI_Communities | Syn-3_0_2312 | 54434  | SSH1     |
| Synapse_PPI_Communities | Syn-3_0_2312 | 229    | ALDOB    |
| Synapse_PPI_Communities | Syn-3_0_2312 | 111    | ADCY5    |

|                         |              |        |           |
|-------------------------|--------------|--------|-----------|
| Synapse_PPI_Communities | Syn-3_0_2312 | 108    | ADCY2     |
| Synapse_PPI_Communities | Syn-3_0_2312 | 387    | RHOA      |
| Synapse_PPI_Communities | Syn-3_0_2312 | 7430   | EZR       |
| Synapse_PPI_Communities | Syn-3_0_2312 | 1609   | DGKQ      |
| Synapse_PPI_Communities | Syn-3_0_2312 | 10890  | RAB10     |
| Synapse_PPI_Communities | Syn-3_0_2312 | 94120  | SYTL3     |
| Synapse_PPI_Communities | Syn-3_0_2312 | 8899   | PRPF4B    |
| Synapse_PPI_Communities | Syn-3_0_2312 | 53916  | RAB4B     |
| Synapse_PPI_Communities | Syn-3_0_2312 | 55208  | DCUN1D2   |
| Synapse_PPI_Communities | Syn-3_0_2312 | 23542  | MAPK8IP2  |
| Synapse_PPI_Communities | Syn-3_0_2312 | 2257   | FGF12     |
| Synapse_PPI_Communities | Syn-3_0_2312 | 396    | ARHGDI3   |
| Synapse_PPI_Communities | Syn-3_0_2312 | 1967   | EIF2B1    |
| Synapse_PPI_Communities | Syn-3_0_2312 | 23474  | ETHE1     |
| Synapse_PPI_Communities | Syn-3_0_2312 | 256364 | EML3      |
| Synapse_PPI_Communities | Syn-3_0_2312 | 391634 | HSP90AB2P |
| Synapse_PPI_Communities | Syn-3_0_2312 | 900    | CCNG1     |
| Synapse_PPI_Communities | Syn-3_0_2312 | 50852  | TRAT1     |
| Synapse_PPI_Communities | Syn-3_0_2312 | 51013  | EXOSC1    |
| Synapse_PPI_Communities | Syn-3_0_2312 | 84545  | MRPL43    |
| Synapse_PPI_Communities | Syn-3_0_2312 | 10165  | SLC25A13  |
| Synapse_PPI_Communities | Syn-3_0_2312 | 4035   | LRP1      |
| Synapse_PPI_Communities | Syn-3_0_2312 | 2157   | F8        |
| Synapse_PPI_Communities | Syn-3_0_2312 | 83451  | ABHD11    |
| Synapse_PPI_Communities | Syn-3_0_2312 | 3884   | KRT33B    |
| Synapse_PPI_Communities | Syn-3_0_2312 | 134492 | NUDCD2    |
| Synapse_PPI_Communities | Syn-3_0_2312 | 10526  | IPO8      |
| Synapse_PPI_Communities | Syn-3_0_2312 | 1562   | CYP2C18   |
| Synapse_PPI_Communities | Syn-3_0_2312 | 8078   | USP5      |
| Synapse_PPI_Communities | Syn-3_0_2312 | 9943   | OXSR1     |
| Synapse_PPI_Communities | Syn-3_0_2312 | 4831   | NME2      |
| Synapse_PPI_Communities | Syn-3_0_2312 | 5437   | POLR2H    |
| Synapse_PPI_Communities | Syn-3_0_2312 | 79711  | IPO4      |
| Synapse_PPI_Communities | Syn-3_0_2312 | 56990  | CDC42SE2  |
| Synapse_PPI_Communities | Syn-3_0_2312 | 2868   | GRK4      |
| Synapse_PPI_Communities | Syn-3_0_2312 | 3845   | KRAS      |
| Synapse_PPI_Communities | Syn-3_0_2312 | 8036   | SHOC2     |
| Synapse_PPI_Communities | Syn-3_0_2312 | 5592   | PRKG1     |
| Synapse_PPI_Communities | Syn-3_0_2312 | 7038   | TG        |
| Synapse_PPI_Communities | Syn-3_0_2312 | 55361  | PI4K2A    |
| Synapse_PPI_Communities | Syn-3_0_2312 | 1013   | CDH15     |
| Synapse_PPI_Communities | Syn-3_0_2312 | 56945  | MRPS22    |
| Synapse_PPI_Communities | Syn-3_0_2312 | 677    | ZFP36L1   |
| Synapse_PPI_Communities | Syn-3_0_2312 | 915    | CD3D      |
| Synapse_PPI_Communities | Syn-3_0_2312 | 25831  | HECTD1    |
| Synapse_PPI_Communities | Syn-3_0_2312 | 64708  | COPS7B    |
| Synapse_PPI_Communities | Syn-3_0_2312 | 777    | CACNA1E   |
| Synapse_PPI_Communities | Syn-3_0_2312 | 3500   | IGHG1     |
| Synapse_PPI_Communities | Syn-3_0_2312 | 2972   | BRF1      |
| Synapse_PPI_Communities | Syn-3_0_2312 | 1785   | DNM2      |
| Synapse_PPI_Communities | Syn-3_0_2312 | 79694  | MANEA     |
| Synapse_PPI_Communities | Syn-3_0_2312 | 79980  | DSN1      |
| Synapse_PPI_Communities | Syn-3_0_2312 | 9912   | ARHGAP44  |
| Synapse_PPI_Communities | Syn-3_0_2312 | 80852  | GRIP2     |
| Synapse_PPI_Communities | Syn-3_0_2312 | 95     | ACY1      |
| Synapse_PPI_Communities | Syn-3_0_2312 | 66005  | CHID1     |
| Synapse_PPI_Communities | Syn-3_0_2312 | 573    | BAG1      |
| Synapse_PPI_Communities | Syn-3_0_2312 | 8546   | AP3B1     |



|                         |              |           |           |
|-------------------------|--------------|-----------|-----------|
| Synapse_PPI_Communities | Syn-3_0_2312 | 8943      | AP3D1     |
| Synapse_PPI_Communities | Syn-3_0_2312 | 10239     | AP3S2     |
| Synapse_PPI_Communities | Syn-3_0_2312 | 26292     | MYCBP     |
| Synapse_PPI_Communities | Syn-3_0_2312 | 26576     | SRPK3     |
| Synapse_PPI_Communities | Syn-3_0_2312 | 1119      | CHKA      |
| Synapse_PPI_Communities | Syn-3_0_2312 | 55037     | PTCD3     |
| Synapse_PPI_Communities | Syn-3_0_2312 | 5106      | PCK2      |
| Synapse_PPI_Communities | Syn-3_0_2312 | 50        | ACO2      |
| Synapse_PPI_Communities | Syn-3_0_2312 | 8907      | AP1M1     |
| Synapse_PPI_Communities | Syn-3_0_2312 | 162       | AP1B1     |
| Synapse_PPI_Communities | Syn-3_0_2312 | 8905      | AP1S2     |
| Synapse_PPI_Communities | Syn-3_0_2312 | 1174      | AP1S1     |
| Synapse_PPI_Communities | Syn-3_0_2312 | 64848     | YTHDC2    |
| Synapse_PPI_Communities | Syn-3_0_2312 | 51649     | MRPS23    |
| Synapse_PPI_Communities | Syn-3_0_2312 | 7019      | TFAM      |
| Synapse_PPI_Communities | Syn-3_0_2312 | 4643      | MYO1E     |
| Synapse_PPI_Communities | Syn-3_0_2312 | 5211      | PFKL      |
| Synapse_PPI_Communities | Syn-3_0_2312 | 51530     | ZC3HC1    |
| Synapse_PPI_Communities | Syn-3_0_2312 | 8976      | WASL      |
| Synapse_PPI_Communities | Syn-3_0_2312 | 27257     | LSM1      |
| Synapse_PPI_Communities | Syn-3_0_2312 | 60681     | FKBP10    |
| Synapse_PPI_Communities | Syn-3_0_2312 | 23168     | RTF1      |
| Synapse_PPI_Communities | Syn-3_0_2312 | 109       | ADCY3     |
| Synapse_PPI_Communities | Syn-3_0_2312 | 10295     | BCKDK     |
| Synapse_PPI_Communities | Syn-3_0_2312 | 28957     | MRPS28    |
| Synapse_PPI_Communities | Syn-3_0_2312 | 64432     | MRPS25    |
| Synapse_PPI_Communities | Syn-3_0_2312 | 79921     | TCEAL4    |
| Synapse_PPI_Communities | Syn-3_0_2312 | 23234     | DNAJC9    |
| Synapse_PPI_Communities | Syn-3_0_2312 | 10728     | PTGES3    |
| Synapse_PPI_Communities | Syn-3_0_2312 | 8601      | RGS20     |
| Synapse_PPI_Communities | Syn-3_0_2312 | 7381      | UQCRB     |
| Synapse_PPI_Communities | Syn-3_0_2312 | 6470      | SHMT1     |
| Synapse_PPI_Communities | Syn-3_0_2312 | 135644    | TRIM40    |
| Synapse_PPI_Communities | Syn-3_0_2312 | 5432      | POLR2C    |
| Synapse_PPI_Communities | Syn-3_0_2312 | 8339      | HIST1H2BG |
| Synapse_PPI_Communities | Syn-3_0_2312 | 317772    | HIST2H2AB |
| Synapse_PPI_Communities | Syn-3_0_2312 | 3013      | HIST1H2AD |
| Synapse_PPI_Communities | Syn-3_0_2312 | 100505503 | RPS17L    |
| Synapse_PPI_Communities | Syn-3_0_2312 | 93380     | MMGT1     |
| Synapse_PPI_Communities | Syn-3_0_2312 | 5888      | RAD51     |
| Synapse_PPI_Communities | Syn-3_0_2312 | 3265      | HRAS      |
| Synapse_PPI_Communities | Syn-3_0_2312 | 8315      | BRAP      |
| Synapse_PPI_Communities | Syn-3_0_2312 | 10059     | DNM1L     |
| Synapse_PPI_Communities | Syn-3_0_2312 | 84262     | PSMG3     |
| Synapse_PPI_Communities | Syn-3_0_2312 | 219988    | PATL1     |
| Synapse_PPI_Communities | Syn-3_0_2312 | 81704     | DOCK8     |
| Synapse_PPI_Communities | Syn-3_0_2312 | 55336     | FBXL8     |
| Synapse_PPI_Communities | Syn-3_0_2312 | 2036      | EPB41L1   |
| Synapse_PPI_Communities | Syn-3_0_2312 | 5691      | PSMB3     |
| Synapse_PPI_Communities | Syn-3_0_2312 | 4733      | DRG1      |
| Synapse_PPI_Communities | Syn-3_0_2312 | 26097     | CHTOP     |
| Synapse_PPI_Communities | Syn-3_0_2312 | 9020      | MAP3K14   |
| Synapse_PPI_Communities | Syn-3_0_2312 | 5908      | RAP1B     |
| Synapse_PPI_Communities | Syn-3_0_2312 | 338382    | RAB7B     |
| Synapse_PPI_Communities | Syn-3_0_2312 | 1264      | CNN1      |
| Synapse_PPI_Communities | Syn-3_0_2312 | 6605      | SMARCE1   |
| Synapse_PPI_Communities | Syn-3_0_2312 | 56965     | PARP6     |
| Synapse_PPI_Communities | Syn-3_0_2312 | 23190     | UBXN4     |

|                         |              |        |          |
|-------------------------|--------------|--------|----------|
| Synapse_PPI_Communities | Syn-3_0_2312 | 9344   | TAOK2    |
| Synapse_PPI_Communities | Syn-3_0_2312 | 10815  | CPLX1    |
| Synapse_PPI_Communities | Syn-3_0_2312 | 57446  | NDRG3    |
| Synapse_PPI_Communities | Syn-3_0_2312 | 5530   | PPP3CA   |
| Synapse_PPI_Communities | Syn-3_0_2312 | 4898   | NRD1     |
| Synapse_PPI_Communities | Syn-3_0_2312 | 6945   | MLX      |
| Synapse_PPI_Communities | Syn-3_0_2312 | 5356   | PLRG1    |
| Synapse_PPI_Communities | Syn-3_0_2312 | 4157   | MC1R     |
| Synapse_PPI_Communities | Syn-3_0_2312 | 10313  | RTN3     |
| Synapse_PPI_Communities | Syn-3_0_2312 | 57142  | RTN4     |
| Synapse_PPI_Communities | Syn-3_0_2312 | 10087  | COL4A3BP |
| Synapse_PPI_Communities | Syn-3_0_2312 | 25923  | ATL3     |
| Synapse_PPI_Communities | Syn-3_0_2312 | 54541  | DDIT4    |
| Synapse_PPI_Communities | Syn-3_0_2312 | 6167   | RPL37    |
| Synapse_PPI_Communities | Syn-3_0_2312 | 23647  | ARFIP2   |
| Synapse_PPI_Communities | Syn-3_0_2312 | 23421  | ITGB3BP  |
| Synapse_PPI_Communities | Syn-3_0_2312 | 8623   | ASMTL    |
| Synapse_PPI_Communities | Syn-3_0_2312 | 80273  | GRPEL1   |
| Synapse_PPI_Communities | Syn-3_0_2312 | 29925  | GMPPB    |
| Synapse_PPI_Communities | Syn-3_0_2312 | 7388   | UQCRH    |
| Synapse_PPI_Communities | Syn-3_0_2312 | 6440   | SFTPC    |
| Synapse_PPI_Communities | Syn-3_0_2312 | 7030   | TFE3     |
| Synapse_PPI_Communities | Syn-3_0_2312 | 92856  | IMP4     |
| Synapse_PPI_Communities | Syn-3_0_2312 | 205    | AK4      |
| Synapse_PPI_Communities | Syn-3_0_2312 | 22826  | DNAJC8   |
| Synapse_PPI_Communities | Syn-3_0_2312 | 5345   | SERPINF2 |
| Synapse_PPI_Communities | Syn-3_0_2312 | 4709   | NDUFB3   |
| Synapse_PPI_Communities | Syn-3_0_2312 | 831    | CAST     |
| Synapse_PPI_Communities | Syn-3_0_2312 | 6456   | SH3GL2   |
| Synapse_PPI_Communities | Syn-3_0_2312 | 79364  | ZXDC     |
| Synapse_PPI_Communities | Syn-3_0_2312 | 11040  | PIM2     |
| Synapse_PPI_Communities | Syn-3_0_2312 | 27236  | ARFIP1   |
| Synapse_PPI_Communities | Syn-3_0_2312 | 10598  | AHSA1    |
| Synapse_PPI_Communities | Syn-3_0_2312 | 23612  | PHLDA3   |
| Synapse_PPI_Communities | Syn-3_0_2312 | 9135   | RABEP1   |
| Synapse_PPI_Communities | Syn-3_0_2312 | 55860  | ACTR10   |
| Synapse_PPI_Communities | Syn-3_0_2312 | 26284  | ERAL1    |
| Synapse_PPI_Communities | Syn-3_0_2312 | 5576   | PRKAR2A  |
| Synapse_PPI_Communities | Syn-3_0_2312 | 10564  | ARFGEF2  |
| Synapse_PPI_Communities | Syn-3_0_2312 | 9820   | CUL7     |
| Synapse_PPI_Communities | Syn-3_0_2312 | 5832   | ALDH18A1 |
| Synapse_PPI_Communities | Syn-3_0_2312 | 55561  | CDC42BPG |
| Synapse_PPI_Communities | Syn-3_0_2312 | 2618   | GART     |
| Synapse_PPI_Communities | Syn-3_0_2312 | 201176 | ARHGAP27 |
| Synapse_PPI_Communities | Syn-3_0_2312 | 3853   | KRT6A    |
| Synapse_PPI_Communities | Syn-3_0_2312 | 10939  | AFG3L2   |
| Synapse_PPI_Communities | Syn-3_0_2312 | 9776   | ATG13    |
| Synapse_PPI_Communities | Syn-3_0_2312 | 10069  | RWDD2B   |
| Synapse_PPI_Communities | Syn-3_0_2312 | 5287   | PIK3C2B  |
| Synapse_PPI_Communities | Syn-3_0_2312 | 22930  | RAB3GAP1 |
| Synapse_PPI_Communities | Syn-3_0_2312 | 25782  | RAB3GAP2 |
| Synapse_PPI_Communities | Syn-3_0_2312 | 26073  | POLDIP2  |
| Synapse_PPI_Communities | Syn-3_0_2312 | 23191  | CYFIP1   |
| Synapse_PPI_Communities | Syn-3_0_2312 | 5238   | PGM3     |
| Synapse_PPI_Communities | Syn-3_0_2312 | 259    | AMBP     |
| Synapse_PPI_Communities | Syn-3_0_2312 | 8725   | URI1     |
| Synapse_PPI_Communities | Syn-3_0_2312 | 4793   | NFKBIB   |
| Synapse_PPI_Communities | Syn-3_0_2312 | 319101 | KRT73    |

|                         |              |        |          |
|-------------------------|--------------|--------|----------|
| Synapse_PPI_Communities | Syn-3_0_2312 | 10248  | POP7     |
| Synapse_PPI_Communities | Syn-3_0_2312 | 11159  | RABL2A   |
| Synapse_PPI_Communities | Syn-3_0_2312 | 79930  | DOK3     |
| Synapse_PPI_Communities | Syn-3_0_2312 | 26263  | FBXO22   |
| Synapse_PPI_Communities | Syn-3_0_2312 | 54455  | FBXO42   |
| Synapse_PPI_Communities | Syn-3_0_2312 | 80028  | FBXL18   |
| Synapse_PPI_Communities | Syn-3_0_2312 | 54461  | FBXW5    |
| Synapse_PPI_Communities | Syn-3_0_2312 | 80204  | FBXO11   |
| Synapse_PPI_Communities | Syn-3_0_2312 | 90293  | KLHL13   |
| Synapse_PPI_Communities | Syn-3_0_2312 | 55692  | LUC7L    |
| Synapse_PPI_Communities | Syn-3_0_2312 | 2683   | B4GALT1  |
| Synapse_PPI_Communities | Syn-3_0_2312 | 50937  | CDON     |
| Synapse_PPI_Communities | Syn-3_0_2312 | 23395  | LARS2    |
| Synapse_PPI_Communities | Syn-3_0_2312 | 11269  | DDX19B   |
| Synapse_PPI_Communities | Syn-3_0_2312 | 1977   | EIF4E    |
| Synapse_PPI_Communities | Syn-3_0_2312 | 135114 | HINT3    |
| Synapse_PPI_Communities | Syn-3_0_2312 | 1436   | CSF1R    |
| Synapse_PPI_Communities | Syn-3_0_2312 | 80823  | BHLHB9   |
| Synapse_PPI_Communities | Syn-3_0_2312 | 51004  | COQ6     |
| Synapse_PPI_Communities | Syn-3_0_2312 | 10110  | SGK2     |
| Synapse_PPI_Communities | Syn-3_0_2312 | 2324   | FLT4     |
| Synapse_PPI_Communities | Syn-3_0_2312 | 79169  | C1orf35  |
| Synapse_PPI_Communities | Syn-3_0_2312 | 9448   | MAP4K4   |
| Synapse_PPI_Communities | Syn-3_0_2312 | 23678  | SGK3     |
| Synapse_PPI_Communities | Syn-3_0_2312 | 79858  | NEK11    |
| Synapse_PPI_Communities | Syn-3_0_2312 | 9615   | GDA      |
| Synapse_PPI_Communities | Syn-3_0_2312 | 2744   | GLS      |
| Synapse_PPI_Communities | Syn-3_0_2312 | 2799   | GNS      |
| Synapse_PPI_Communities | Syn-3_0_2312 | 3957   | LGALS2   |
| Synapse_PPI_Communities | Syn-3_0_2312 | 57508  | INTS2    |
| Synapse_PPI_Communities | Syn-3_0_2312 | 81545  | FBXO38   |
| Synapse_PPI_Communities | Syn-3_0_2312 | 5184   | PEPD     |
| Synapse_PPI_Communities | Syn-3_0_2312 | 26224  | FBXL3    |
| Synapse_PPI_Communities | Syn-3_0_2312 | 55308  | DDX19A   |
| Synapse_PPI_Communities | Syn-3_0_2312 | 9391   | CIAO1    |
| Synapse_PPI_Communities | Syn-3_0_2312 | 122704 | MRPL52   |
| Synapse_PPI_Communities | Syn-3_0_2312 | 6279   | S100A8   |
| Synapse_PPI_Communities | Syn-3_0_2312 | 51127  | TRIM17   |
| Synapse_PPI_Communities | Syn-3_0_2312 | 8209   | C21orf33 |
| Synapse_PPI_Communities | Syn-3_0_2312 | 23034  | SAMD4A   |
| Synapse_PPI_Communities | Syn-3_0_2312 | 115290 | FBXO17   |
| Synapse_PPI_Communities | Syn-3_0_2312 | 126433 | FBXO27   |
| Synapse_PPI_Communities | Syn-3_0_2312 | 9462   | RASAL2   |
| Synapse_PPI_Communities | Syn-3_0_2312 | 84861  | KLHL22   |
| Synapse_PPI_Communities | Syn-3_0_2312 | 114792 | KLHL32   |
| Synapse_PPI_Communities | Syn-3_0_2312 | 122786 | FRMD6    |
| Synapse_PPI_Communities | Syn-3_0_2312 | 83732  | RIOK1    |
| Synapse_PPI_Communities | Syn-3_0_2312 | 57679  | ALS2     |
| Synapse_PPI_Communities | Syn-3_0_2312 | 26272  | FBXO4    |
| Synapse_PPI_Communities | Syn-3_0_2312 | 55213  | RCBTB1   |
| Synapse_PPI_Communities | Syn-3_0_2312 | 9306   | SOCS6    |
| Synapse_PPI_Communities | Syn-3_0_2312 | 10436  | EMG1     |
| Synapse_PPI_Communities | Syn-3_0_2312 | 54778  | RNF111   |
| Synapse_PPI_Communities | Syn-3_0_2312 | 64951  | MRPS24   |
| Synapse_PPI_Communities | Syn-3_0_2312 | 57645  | POGK     |
| Synapse_PPI_Communities | Syn-3_0_2312 | 56144  | PCDHA4   |
| Synapse_PPI_Communities | Syn-3_0_2312 | 51056  | LAP3     |
| Synapse_PPI_Communities | Syn-3_0_2312 | 50945  | TBX22    |

|                         |              |        |           |
|-------------------------|--------------|--------|-----------|
| Synapse_PPI_Communities | Syn-3_0_2312 | 56987  | BBX       |
| Synapse_PPI_Communities | Syn-3_0_2312 | 23532  | PRAME     |
| Synapse_PPI_Communities | Syn-3_0_2312 | 51078  | THAP4     |
| Synapse_PPI_Communities | Syn-3_0_2312 | 5935   | RBM3      |
| Synapse_PPI_Communities | Syn-3_0_2312 | 81788  | NUAK2     |
| Synapse_PPI_Communities | Syn-3_0_2312 | 84172  | POLR1B    |
| Synapse_PPI_Communities | Syn-3_0_2312 | 55655  | NLRP2     |
| Synapse_PPI_Communities | Syn-3_0_2312 | 79012  | CAMKV     |
| Synapse_PPI_Communities | Syn-3_0_2312 | 5429   | POLH      |
| Synapse_PPI_Communities | Syn-3_0_2312 | 5753   | PTK6      |
| Synapse_PPI_Communities | Syn-3_0_2312 | 1163   | CKS1B     |
| Synapse_PPI_Communities | Syn-3_0_2312 | 11315  | PARK7     |
| Synapse_PPI_Communities | Syn-3_0_2312 | 6620   | SNCB      |
| Synapse_PPI_Communities | Syn-3_0_2312 | 1263   | PLK3      |
| Synapse_PPI_Communities | Syn-3_0_2312 | 11333  | PDAP1     |
| Synapse_PPI_Communities | Syn-3_0_2312 | 1612   | DAPK1     |
| Synapse_PPI_Communities | Syn-3_0_2312 | 103910 | MYL12B    |
| Synapse_PPI_Communities | Syn-3_0_2312 | 84950  | PRPF38A   |
| Synapse_PPI_Communities | Syn-3_0_2312 | 27248  | ERLEC1    |
| Synapse_PPI_Communities | Syn-3_0_2312 | 4830   | NME1      |
| Synapse_PPI_Communities | Syn-3_0_2312 | 2224   | FDPS      |
| Synapse_PPI_Communities | Syn-3_0_2312 | 23221  | RHOBTB2   |
| Synapse_PPI_Communities | Syn-3_0_2312 | 2902   | GRIN1     |
| Synapse_PPI_Communities | Syn-3_0_2312 | 116444 | GRIN3B    |
| Synapse_PPI_Communities | Syn-3_0_2312 | 4593   | MUSK      |
| Synapse_PPI_Communities | Syn-3_0_2312 | 60489  | APOBEC3G  |
| Synapse_PPI_Communities | Syn-3_0_2312 | 55781  | RIOK2     |
| Synapse_PPI_Communities | Syn-3_0_2312 | 10549  | PRDX4     |
| Synapse_PPI_Communities | Syn-3_0_2312 | 7352   | UCP3      |
| Synapse_PPI_Communities | Syn-3_0_2312 | 11279  | KLF8      |
| Synapse_PPI_Communities | Syn-3_0_2312 | 282974 | STK32C    |
| Synapse_PPI_Communities | Syn-3_0_2312 | 152503 | SH3D19    |
| Synapse_PPI_Communities | Syn-3_0_2312 | 1739   | DLG1      |
| Synapse_PPI_Communities | Syn-3_0_2312 | 3759   | KCNJ2     |
| Synapse_PPI_Communities | Syn-3_0_2312 | 65268  | WNK2      |
| Synapse_PPI_Communities | Syn-3_0_2312 | 64784  | CRTC3     |
| Synapse_PPI_Communities | Syn-3_0_2312 | 55835  | CENPJ     |
| Synapse_PPI_Communities | Syn-3_0_2312 | 10672  | GNA13     |
| Synapse_PPI_Communities | Syn-3_0_2312 | 10566  | AKAP3     |
| Synapse_PPI_Communities | Syn-3_0_2312 | 140809 | SRXN1     |
| Synapse_PPI_Communities | Syn-3_0_2312 | 11346  | SYNPO     |
| Synapse_PPI_Communities | Syn-3_0_2312 | 4313   | MMP2      |
| Synapse_PPI_Communities | Syn-3_0_2312 | 4023   | LPL       |
| Synapse_PPI_Communities | Syn-3_0_2312 | 10198  | MPHOSPH9  |
| Synapse_PPI_Communities | Syn-3_0_2312 | 8888   | MCM3AP    |
| Synapse_PPI_Communities | Syn-3_0_2312 | 8853   | ASAP2     |
| Synapse_PPI_Communities | Syn-3_0_2312 | 6760   | SS18      |
| Synapse_PPI_Communities | Syn-3_0_2312 | 81608  | FIP1L1    |
| Synapse_PPI_Communities | Syn-3_0_2312 | 5774   | PTPN3     |
| Synapse_PPI_Communities | Syn-3_0_2312 | 63943  | FKBPL     |
| Synapse_PPI_Communities | Syn-3_0_2312 | 2308   | FOXO1     |
| Synapse_PPI_Communities | Syn-3_0_2312 | 8449   | DHX16     |
| Synapse_PPI_Communities | Syn-3_0_2312 | 4833   | NME4      |
| Synapse_PPI_Communities | Syn-3_0_2312 | 196441 | ZFC3H1    |
| Synapse_PPI_Communities | Syn-3_0_2312 | 10742  | RAI2      |
| Synapse_PPI_Communities | Syn-3_0_2312 | 79982  | DNAJB14   |
| Synapse_PPI_Communities | Syn-3_0_2312 | 730211 | HSP90AA5P |
| Synapse_PPI_Communities | Syn-3_0_2312 | 23786  | BCL2L13   |

|                         |              |        |          |
|-------------------------|--------------|--------|----------|
| Synapse_PPI_Communities | Syn-3_0_2312 | 57018  | CCNL1    |
| Synapse_PPI_Communities | Syn-3_0_2312 | 912    | CD1D     |
| Synapse_PPI_Communities | Syn-3_0_2312 | 5582   | PRKCG    |
| Synapse_PPI_Communities | Syn-3_0_2312 | 2557   | GABRA4   |
| Synapse_PPI_Communities | Syn-3_0_2312 | 7166   | TPH1     |
| Synapse_PPI_Communities | Syn-3_0_2312 | 25864  | ABHD14A  |
| Synapse_PPI_Communities | Syn-3_0_2312 | 7818   | DAP3     |
| Synapse_PPI_Communities | Syn-3_0_2312 | 2870   | GRK6     |
| Synapse_PPI_Communities | Syn-3_0_2312 | 6011   | GRK1     |
| Synapse_PPI_Communities | Syn-3_0_2312 | 114034 | TOE1     |
| Synapse_PPI_Communities | Syn-3_0_2312 | 51021  | MRPS16   |
| Synapse_PPI_Communities | Syn-3_0_2312 | 9915   | ARNT2    |
| Synapse_PPI_Communities | Syn-3_0_2312 | 1007   | CDH9     |
| Synapse_PPI_Communities | Syn-3_0_2312 | 728    | C5AR1    |
| Synapse_PPI_Communities | Syn-3_0_2312 | 56905  | C15orf39 |
| Synapse_PPI_Communities | Syn-3_0_2312 | 55929  | DMAP1    |
| Synapse_PPI_Communities | Syn-3_0_2312 | 23621  | BACE1    |
| Synapse_PPI_Communities | Syn-3_0_2312 | 350    | APOH     |
| Synapse_PPI_Communities | Syn-3_0_2312 | 80311  | KLHL15   |
| Synapse_PPI_Communities | Syn-3_0_2312 | 22882  | ZHX2     |
| Synapse_PPI_Communities | Syn-3_0_2312 | 51191  | HERC5    |
| Synapse_PPI_Communities | Syn-3_0_2312 | 10325  | RRAGB    |
| Synapse_PPI_Communities | Syn-3_0_2312 | 51503  | CWC15    |
| Synapse_PPI_Communities | Syn-3_0_2312 | 84916  | CIRH1A   |
| Synapse_PPI_Communities | Syn-3_0_2312 | 94274  | PPP1R14A |
| Synapse_PPI_Communities | Syn-3_0_2312 | 1454   | CSNK1E   |
| Synapse_PPI_Communities | Syn-3_0_2312 | 11104  | KATNA1   |
| Synapse_PPI_Communities | Syn-3_0_2312 | 5578   | PRKCA    |
| Synapse_PPI_Communities | Syn-3_0_2312 | 23513  | SCRIB    |
| Synapse_PPI_Communities | Syn-3_0_2312 | 51322  | WAC      |
| Synapse_PPI_Communities | Syn-3_0_2312 | 790    | CAD      |
| Synapse_PPI_Communities | Syn-3_0_2312 | 4133   | MAP2     |
| Synapse_PPI_Communities | Syn-3_0_2312 | 5719   | PSMD13   |
| Synapse_PPI_Communities | Syn-3_0_2312 | 23243  | ANKRD28  |
| Synapse_PPI_Communities | Syn-3_0_2312 | 3148   | HMGB2    |
| Synapse_PPI_Communities | Syn-3_0_2312 | 8507   | ENC1     |
| Synapse_PPI_Communities | Syn-3_0_2312 | 23071  | ERP44    |
| Synapse_PPI_Communities | Syn-3_0_2312 | 6732   | SRPK1    |
| Synapse_PPI_Communities | Syn-3_0_2312 | 782    | CACNB1   |
| Synapse_PPI_Communities | Syn-3_0_2312 | 84106  | PRAM1    |
| Synapse_PPI_Communities | Syn-3_0_2312 | 2193   | FARSA    |
| Synapse_PPI_Communities | Syn-3_0_2312 | 147841 | SPC24    |
| Synapse_PPI_Communities | Syn-3_0_2312 | 2181   | ACSL3    |
| Synapse_PPI_Communities | Syn-3_0_2312 | 2182   | ACSL4    |
| Synapse_PPI_Communities | Syn-3_0_2312 | 10972  | TMED10   |
| Synapse_PPI_Communities | Syn-3_0_2312 | 140461 | ASB8     |
| Synapse_PPI_Communities | Syn-3_0_2312 | 11168  | PSIP1    |
| Synapse_PPI_Communities | Syn-3_0_2312 | 8407   | TAGLN2   |
| Synapse_PPI_Communities | Syn-3_0_2312 | 10286  | BCAS2    |
| Synapse_PPI_Communities | Syn-3_0_2312 | 10049  | DNAJB6   |
| Synapse_PPI_Communities | Syn-3_0_2312 | 57606  | SLAIN2   |
| Synapse_PPI_Communities | Syn-3_0_2312 | 65108  | MARCKSL1 |
| Synapse_PPI_Communities | Syn-3_0_2312 | 26589  | MRPL46   |
| Synapse_PPI_Communities | Syn-3_0_2312 | 56922  | MCCC1    |
| Synapse_PPI_Communities | Syn-3_0_2312 | 3306   | HSPA2    |
| Synapse_PPI_Communities | Syn-3_0_2312 | 2026   | ENO2     |
| Synapse_PPI_Communities | Syn-3_0_2312 | 4860   | PNP      |
| Synapse_PPI_Communities | Syn-3_0_2312 | 10254  | STAM2    |

|                         |              |        |          |
|-------------------------|--------------|--------|----------|
| Synapse_PPI_Communities | Syn-3_0_2312 | 22950  | SLC4A1AP |
| Synapse_PPI_Communities | Syn-3_0_2312 | 5756   | TWF1     |
| Synapse_PPI_Communities | Syn-3_0_2312 | 54534  | MRPL50   |
| Synapse_PPI_Communities | Syn-3_0_2312 | 85451  | UNK      |
| Synapse_PPI_Communities | Syn-3_0_2312 | 26276  | VPS33B   |
| Synapse_PPI_Communities | Syn-3_0_2312 | 51699  | VPS29    |
| Synapse_PPI_Communities | Syn-3_0_2312 | 55705  | IPO9     |
| Synapse_PPI_Communities | Syn-3_0_2312 | 9948   | WDR1     |
| Synapse_PPI_Communities | Syn-3_0_2312 | 3093   | UBE2K    |
| Synapse_PPI_Communities | Syn-3_0_2312 | 56658  | TRIM39   |
| Synapse_PPI_Communities | Syn-3_0_2312 | 9939   | RBM8A    |
| Synapse_PPI_Communities | Syn-3_0_2312 | 11316  | COPE     |
| Synapse_PPI_Communities | Syn-3_0_2312 | 9701   | PPP6R2   |
| Synapse_PPI_Communities | Syn-3_0_2312 | 1155   | TBCB     |
| Synapse_PPI_Communities | Syn-3_0_2312 | 4791   | NFKB2    |
| Synapse_PPI_Communities | Syn-3_0_2312 | 22858  | ICK      |
| Synapse_PPI_Communities | Syn-3_0_2312 | 29899  | GPSM2    |
| Synapse_PPI_Communities | Syn-3_0_2312 | 79657  | RPAP3    |
| Synapse_PPI_Communities | Syn-3_0_2312 | 92591  | ASB16    |
| Synapse_PPI_Communities | Syn-3_0_2312 | 5514   | PPP1R10  |
| Synapse_PPI_Communities | Syn-3_0_2312 | 5693   | PSMB5    |
| Synapse_PPI_Communities | Syn-3_0_2312 | 6907   | TBL1X    |
| Synapse_PPI_Communities | Syn-3_0_2312 | 91653  | BOC      |
| Synapse_PPI_Communities | Syn-3_0_2312 | 4773   | NFATC2   |
| Synapse_PPI_Communities | Syn-3_0_2312 | 2047   | EPHB1    |
| Synapse_PPI_Communities | Syn-3_0_2312 | 10762  | NUP50    |
| Synapse_PPI_Communities | Syn-3_0_2312 | 57658  | CALCOCO1 |
| Synapse_PPI_Communities | Syn-3_0_2312 | 5607   | MAP2K5   |
| Synapse_PPI_Communities | Syn-3_0_2312 | 80279  | CDK5RAP3 |
| Synapse_PPI_Communities | Syn-3_0_2312 | 4645   | MYO5B    |
| Synapse_PPI_Communities | Syn-3_0_2312 | 25827  | FBXL2    |
| Synapse_PPI_Communities | Syn-3_0_2312 | 8139   | GAN      |
| Synapse_PPI_Communities | Syn-3_0_2312 | 378884 | NHLRC1   |
| Synapse_PPI_Communities | Syn-3_0_2312 | 84759  | PCGF1    |
| Synapse_PPI_Communities | Syn-3_0_2312 | 3001   | GZMA     |
| Synapse_PPI_Communities | Syn-3_0_2312 | 10062  | NR1H3    |
| Synapse_PPI_Communities | Syn-3_0_2312 | 55643  | BTBD2    |
| Synapse_PPI_Communities | Syn-3_0_2312 | 1164   | CKS2     |
| Synapse_PPI_Communities | Syn-3_0_2312 | 5588   | PRKCQ    |
| Synapse_PPI_Communities | Syn-3_0_2312 | 57172  | CAMK1G   |
| Synapse_PPI_Communities | Syn-3_0_2312 | 8030   | CCDC6    |
| Synapse_PPI_Communities | Syn-3_0_2312 | 23705  | CADM1    |
| Synapse_PPI_Communities | Syn-3_0_2312 | 23136  | EPB41L3  |
| Synapse_PPI_Communities | Syn-3_0_2312 | 534    | ATP6V1G2 |
| Synapse_PPI_Communities | Syn-3_0_2312 | 1073   | CFL2     |
| Synapse_PPI_Communities | Syn-3_0_2312 | 9363   | RAB33A   |
| Synapse_PPI_Communities | Syn-3_0_2312 | 79666  | PLEKHF2  |
| Synapse_PPI_Communities | Syn-3_0_2312 | 11135  | CDC42EP1 |
| Synapse_PPI_Communities | Syn-3_0_2312 | 7050   | TGIF1    |
| Synapse_PPI_Communities | Syn-3_0_2312 | 991    | CDC20    |
| Synapse_PPI_Communities | Syn-3_0_2312 | 57596  | BEGAIN   |
| Synapse_PPI_Communities | Syn-3_0_2312 | 10474  | TADA3    |
| Synapse_PPI_Communities | Syn-3_0_2312 | 285527 | FRYL     |
| Synapse_PPI_Communities | Syn-3_0_2312 | 200186 | CRTC2    |
| Synapse_PPI_Communities | Syn-3_0_2312 | 23164  | MPRIP    |
| Synapse_PPI_Communities | Syn-3_0_2312 | 5298   | PI4KB    |
| Synapse_PPI_Communities | Syn-3_0_2312 | 9470   | EIF4E2   |
| Synapse_PPI_Communities | Syn-3_0_2312 | 10128  | LRPPRC   |

|                         |              |        |           |
|-------------------------|--------------|--------|-----------|
| Synapse_PPI_Communities | Syn-3_0_2312 | 3891   | KRT85     |
| Synapse_PPI_Communities | Syn-3_0_2312 | 23294  | ANKS1A    |
| Synapse_PPI_Communities | Syn-3_0_2312 | 55161  | TMEM33    |
| Synapse_PPI_Communities | Syn-3_0_2312 | 57530  | CGN       |
| Synapse_PPI_Communities | Syn-3_0_2312 | 8795   | TNFRSF10B |
| Synapse_PPI_Communities | Syn-3_0_2312 | 843    | CASP10    |
| Synapse_PPI_Communities | Syn-3_0_2312 | 1001   | CDH3      |
| Synapse_PPI_Communities | Syn-3_0_2312 | 91833  | WDR20     |
| Synapse_PPI_Communities | Syn-3_0_2312 | 22927  | HABP4     |
| Synapse_PPI_Communities | Syn-3_0_2312 | 4637   | MYL6      |
| Synapse_PPI_Communities | Syn-3_0_2312 | 79784  | MYH14     |
| Synapse_PPI_Communities | Syn-3_0_2312 | 10398  | MYL9      |
| Synapse_PPI_Communities | Syn-3_0_2312 | 116986 | AGAP2     |
| Synapse_PPI_Communities | Syn-3_0_2312 | 54910  | SEMA4C    |
| Synapse_PPI_Communities | Syn-3_0_2312 | 10567  | RABAC1    |
| Synapse_PPI_Communities | Syn-3_0_2312 | 79890  | RIN3      |
| Synapse_PPI_Communities | Syn-3_0_2312 | 5869   | RAB5B     |
| Synapse_PPI_Communities | Syn-3_0_2312 | 54212  | SNTG1     |
| Synapse_PPI_Communities | Syn-3_0_2312 | 6814   | STXBP3    |
| Synapse_PPI_Communities | Syn-3_0_2312 | 26985  | AP3M1     |
| Synapse_PPI_Communities | Syn-3_0_2312 | 9371   | KIF3B     |
| Synapse_PPI_Communities | Syn-3_0_2312 | 815    | CAMK2A    |
| Synapse_PPI_Communities | Syn-3_0_2312 | 3746   | KCNC1     |
| Synapse_PPI_Communities | Syn-3_0_2312 | 2596   | GAP43     |
| Synapse_PPI_Communities | Syn-3_0_2312 | 842    | CASP9     |
| Synapse_PPI_Communities | Syn-3_0_2312 | 9465   | AKAP7     |
| Synapse_PPI_Communities | Syn-3_0_2312 | 9472   | AKAP6     |
| Synapse_PPI_Communities | Syn-3_0_2312 | 933    | CD22      |
| Synapse_PPI_Communities | Syn-3_0_2312 | 2247   | FGF2      |
| Synapse_PPI_Communities | Syn-3_0_2312 | 28954  | REM1      |
| Synapse_PPI_Communities | Syn-3_0_2312 | 64130  | LIN7B     |
| Synapse_PPI_Communities | Syn-3_0_2312 | 3752   | KCND3     |
| Synapse_PPI_Communities | Syn-3_0_2312 | 55294  | FBXW7     |
| Synapse_PPI_Communities | Syn-3_0_2312 | 2788   | GNG7      |
| Synapse_PPI_Communities | Syn-3_0_2312 | 2784   | GNB3      |
| Synapse_PPI_Communities | Syn-3_0_2312 | 2246   | FGF1      |
| Synapse_PPI_Communities | Syn-3_0_2312 | 6284   | S100A13   |
| Synapse_PPI_Communities | Syn-3_0_2312 | 3915   | LAMC1     |
| Synapse_PPI_Communities | Syn-3_0_2312 | 3150   | HMGN1     |
| Synapse_PPI_Communities | Syn-3_0_2312 | 3762   | KCNJ5     |
| Synapse_PPI_Communities | Syn-3_0_2312 | 1815   | DRD4      |
| Synapse_PPI_Communities | Syn-3_0_2312 | 11337  | GABARAP   |
| Synapse_PPI_Communities | Syn-3_0_2312 | 2079   | ERH       |
| Synapse_PPI_Communities | Syn-3_0_2312 | 2776   | GNAQ      |
| Synapse_PPI_Communities | Syn-3_0_2312 | 2917   | GRM7      |
| Synapse_PPI_Communities | Syn-3_0_2312 | 5159   | PDGFRB    |
| Synapse_PPI_Communities | Syn-3_0_2312 | 4744   | NEFH      |
| Synapse_PPI_Communities | Syn-3_0_2312 | 4747   | NEFL      |
| Synapse_PPI_Communities | Syn-3_0_2312 | 5327   | PLAT      |
| Synapse_PPI_Communities | Syn-3_0_2312 | 11184  | MAP4K1    |
| Synapse_PPI_Communities | Syn-3_0_2312 | 1813   | DRD2      |
| Synapse_PPI_Communities | Syn-3_0_2312 | 56882  | CDC42SE1  |
| Synapse_PPI_Communities | Syn-3_0_2312 | 6285   | S100B     |
| Synapse_PPI_Communities | Syn-3_0_2312 | 10527  | IPO7      |
| Synapse_PPI_Communities | Syn-3_0_2312 | 1901   | S1PR1     |
| Synapse_PPI_Communities | Syn-3_0_2312 | 23770  | FKBP8     |
| Synapse_PPI_Communities | Syn-3_0_2312 | 9900   | SV2A      |
| Synapse_PPI_Communities | Syn-3_0_2312 | 10140  | TOB1      |

|                         |              |           |           |
|-------------------------|--------------|-----------|-----------|
| Synapse_PPI_Communities | Syn-3_0_2312 | 5979      | RET       |
| Synapse_PPI_Communities | Syn-3_0_2312 | 143187    | VTI1A     |
| Synapse_PPI_Communities | Syn-3_0_2312 | 8675      | STX16     |
| Synapse_PPI_Communities | Syn-3_0_2312 | 4983      | OPHN1     |
| Synapse_PPI_Communities | Syn-3_0_2312 | 3107      | HLA-C     |
| Synapse_PPI_Communities | Syn-3_0_2312 | 10912     | GADD45G   |
| Synapse_PPI_Communities | Syn-3_0_2312 | 4916      | NTRK3     |
| Synapse_PPI_Communities | Syn-3_0_2312 | 23022     | PALLD     |
| Synapse_PPI_Communities | Syn-3_0_2312 | 2322      | FLT3      |
| Synapse_PPI_Communities | Syn-3_0_2312 | 92799     | SHKBP1    |
| Synapse_PPI_Communities | Syn-3_0_2312 | 7253      | TSHR      |
| Synapse_PPI_Communities | Syn-3_0_2312 | 6093      | ROCK1     |
| Synapse_PPI_Communities | Syn-3_0_2312 | 3985      | LIMK2     |
| Synapse_PPI_Communities | Syn-3_0_2312 | 80333     | KCNIP4    |
| Synapse_PPI_Communities | Syn-3_0_2312 | 5602      | MAPK10    |
| Synapse_PPI_Communities | Syn-3_0_2312 | 65975     | STK33     |
| Synapse_PPI_Communities | Syn-3_0_2312 | 2065      | ERBB3     |
| Synapse_PPI_Communities | Syn-3_0_2312 | 9419      | CRIP1     |
| Synapse_PPI_Communities | Syn-3_0_2312 | 115557    | ARHGEF25  |
| Synapse_PPI_Communities | Syn-3_0_2312 | 79039     | DDX54     |
| Synapse_PPI_Communities | Syn-3_0_2312 | 2120      | ETV6      |
| Synapse_PPI_Communities | Syn-3_0_2312 | 7336      | UBE2V2    |
| Synapse_PPI_Communities | Syn-3_0_2312 | 9736      | USP34     |
| Synapse_PPI_Communities | Syn-3_0_2312 | 9126      | SMC3      |
| Synapse_PPI_Communities | Syn-3_0_2312 | 85377     | MICALL1   |
| Synapse_PPI_Communities | Syn-3_0_2312 | 55159     | RFWD3     |
| Synapse_PPI_Communities | Syn-3_0_2312 | 9546      | APBA3     |
| Synapse_PPI_Communities | Syn-3_0_2312 | 10010     | TANK      |
| Synapse_PPI_Communities | Syn-3_0_2312 | 9817      | KEAP1     |
| Synapse_PPI_Communities | Syn-3_0_2312 | 10135     | NAMPT     |
| Synapse_PPI_Communities | Syn-3_0_2312 | 3553      | IL1B      |
| Synapse_PPI_Communities | Syn-3_0_2312 | 3097      | HIVEP2    |
| Synapse_PPI_Communities | Syn-3_0_2312 | 3937      | LCP2      |
| Synapse_PPI_Communities | Syn-3_0_2312 | 6744      | SSFA2     |
| Synapse_PPI_Communities | Syn-3_0_2312 | 7812      | CSDE1     |
| Synapse_PPI_Communities | Syn-3_0_2312 | 9750      | FAM65B    |
| Synapse_PPI_Communities | Syn-3_0_2312 | 25937     | WWTR1     |
| Synapse_PPI_Communities | Syn-3_0_2312 | 51306     | FAM13B    |
| Synapse_PPI_Communities | Syn-3_0_2312 | 51307     | FAM53C    |
| Synapse_PPI_Communities | Syn-3_0_2312 | 55167     | MSL2      |
| Synapse_PPI_Communities | Syn-3_0_2312 | 55778     | ZNF839    |
| Synapse_PPI_Communities | Syn-3_0_2312 | 84952     | CGNL1     |
| Synapse_PPI_Communities | Syn-3_0_2312 | 100462977 | MTRNR2L1  |
| Synapse_PPI_Communities | Syn-3_0_2312 | 7351      | UCP2      |
| Synapse_PPI_Communities | Syn-3_0_2312 | 467       | ATF3      |
| Synapse_PPI_Communities | Syn-3_0_2312 | 55596     | ZCCHC8    |
| Synapse_PPI_Communities | Syn-3_0_2312 | 8330      | HIST1H2AK |
| Synapse_PPI_Communities | Syn-3_0_2312 | 4356      | MPP3      |
| Synapse_PPI_Communities | Syn-3_0_2312 | 114609    | TIRAP     |
| Synapse_PPI_Communities | Syn-3_0_2312 | 64802     | NMNAT1    |
| Synapse_PPI_Communities | Syn-3_0_2312 | 85015     | USP45     |
| Synapse_PPI_Communities | Syn-3_0_2312 | 5695      | PSMB7     |
| Synapse_PPI_Communities | Syn-3_0_2312 | 51599     | LSR       |
| Synapse_PPI_Communities | Syn-3_0_2312 | 79084     | WDR77     |
| Synapse_PPI_Communities | Syn-3_0_2312 | 29896     | TRA2A     |
| Synapse_PPI_Communities | Syn-3_0_2312 | 5743      | PTGS2     |
| Synapse_PPI_Communities | Syn-3_0_2312 | 124739    | USP43     |
| Synapse_PPI_Communities | Syn-3_0_2312 | 23216     | TBC1D1    |



|                         |              |        |           |
|-------------------------|--------------|--------|-----------|
| Synapse_PPI_Communities | Syn-3_0_2312 | 26268  | FBXO9     |
| Synapse_PPI_Communities | Syn-3_0_2312 | 89796  | NAV1      |
| Synapse_PPI_Communities | Syn-3_0_2312 | 4772   | NFATC1    |
| Synapse_PPI_Communities | Syn-3_0_2312 | 2961   | GTF2E2    |
| Synapse_PPI_Communities | Syn-3_0_2312 | 23759  | PPIL2     |
| Synapse_PPI_Communities | Syn-3_0_2312 | 5335   | PLCG1     |
| Synapse_PPI_Communities | Syn-3_0_2312 | 5834   | PYGB      |
| Synapse_PPI_Communities | Syn-3_0_2312 | 55148  | UBR7      |
| Synapse_PPI_Communities | Syn-3_0_2312 | 197    | AHSG      |
| Synapse_PPI_Communities | Syn-3_0_2312 | 326    | AIRE      |
| Synapse_PPI_Communities | Syn-3_0_2312 | 10749  | KIF1C     |
| Synapse_PPI_Communities | Syn-3_0_2312 | 83933  | HDAC10    |
| Synapse_PPI_Communities | Syn-3_0_2312 | 5265   | SERPINA1  |
| Synapse_PPI_Communities | Syn-3_0_2312 | 6242   | RTKN      |
| Synapse_PPI_Communities | Syn-3_0_2312 | 27230  | SERP1     |
| Synapse_PPI_Communities | Syn-3_0_2312 | 7704   | ZBTB16    |
| Synapse_PPI_Communities | Syn-3_0_2312 | 26230  | TIAM2     |
| Synapse_PPI_Communities | Syn-3_0_2312 | 51042  | ZNF593    |
| Synapse_PPI_Communities | Syn-3_0_2312 | 3507   | IGHM      |
| Synapse_PPI_Communities | Syn-3_0_2312 | 199731 | CADM4     |
| Synapse_PPI_Communities | Syn-3_0_2312 | 440    | ASNS      |
| Synapse_PPI_Communities | Syn-3_0_2312 | 7905   | REEP5     |
| Synapse_PPI_Communities | Syn-3_0_2312 | 26002  | MOXD1     |
| Synapse_PPI_Communities | Syn-3_0_2312 | 2806   | GOT2      |
| Synapse_PPI_Communities | Syn-3_0_2312 | 23649  | POLA2     |
| Synapse_PPI_Communities | Syn-3_0_2312 | 9189   | ZBED1     |
| Synapse_PPI_Communities | Syn-3_0_2312 | 8833   | GMPS      |
| Synapse_PPI_Communities | Syn-3_0_2312 | 3416   | IDE       |
| Synapse_PPI_Communities | Syn-3_0_2312 | 9818   | NUPL1     |
| Synapse_PPI_Communities | Syn-3_0_2312 | 23476  | BRD4      |
| Synapse_PPI_Communities | Syn-3_0_2312 | 92483  | LDHAL6B   |
| Synapse_PPI_Communities | Syn-3_0_2312 | 5292   | PIM1      |
| Synapse_PPI_Communities | Syn-3_0_2312 | 4144   | MAT2A     |
| Synapse_PPI_Communities | Syn-3_0_2312 | 9099   | USP2      |
| Synapse_PPI_Communities | Syn-3_0_2312 | 9644   | SH3PXD2A  |
| Synapse_PPI_Communities | Syn-3_0_2312 | 22872  | SEC31A    |
| Synapse_PPI_Communities | Syn-3_0_2312 | 654364 | NME1-NME2 |
| Synapse_PPI_Communities | Syn-3_0_2312 | 10422  | UBAC1     |
| Synapse_PPI_Communities | Syn-3_0_2312 | 10808  | HSPH1     |
| Synapse_PPI_Communities | Syn-3_0_2312 | 5496   | PPM1G     |
| Synapse_PPI_Communities | Syn-3_0_2312 | 10146  | G3BP1     |
| Synapse_PPI_Communities | Syn-3_0_2312 | 9584   | RBM39     |
| Synapse_PPI_Communities | Syn-3_0_2312 | 10929  | SRSF8     |
| Synapse_PPI_Communities | Syn-3_0_2312 | 6164   | RPL34     |
| Synapse_PPI_Communities | Syn-3_0_2312 | 3615   | IMPDH2    |
| Synapse_PPI_Communities | Syn-3_0_2312 | 23061  | TBC1D9B   |
| Synapse_PPI_Communities | Syn-3_0_2312 | 1808   | DPYSL2    |
| Synapse_PPI_Communities | Syn-3_0_2312 | 54517  | PUS7      |
| Synapse_PPI_Communities | Syn-3_0_2312 | 56899  | ANKS1B    |
| Synapse_PPI_Communities | Syn-3_0_2312 | 5931   | RBBP7     |
| Synapse_PPI_Communities | Syn-3_0_2312 | 58490  | RPRD1B    |
| Synapse_PPI_Communities | Syn-3_0_2312 | 94239  | H2AFV     |
| Synapse_PPI_Communities | Syn-3_0_2312 | 255626 | HIST1H2BA |
| Synapse_PPI_Communities | Syn-3_0_2312 | 51540  | SCLY      |
| Synapse_PPI_Communities | Syn-3_0_2312 | 23075  | SWAP70    |
| Synapse_PPI_Communities | Syn-3_0_2312 | 65993  | MRPS34    |
| Synapse_PPI_Communities | Syn-3_0_2312 | 9128   | PRPF4     |
| Synapse_PPI_Communities | Syn-3_0_2312 | 6904   | TBCD      |

|                         |              |        |          |
|-------------------------|--------------|--------|----------|
| Synapse_PPI_Communities | Syn-3_0_2312 | 51081  | MRPS7    |
| Synapse_PPI_Communities | Syn-3_0_2312 | 3836   | KPNA1    |
| Synapse_PPI_Communities | Syn-3_0_2312 | 84309  | NUDT16L1 |
| Synapse_PPI_Communities | Syn-3_0_2312 | 23645  | PPP1R15A |
| Synapse_PPI_Communities | Syn-3_0_2312 | 22909  | FAN1     |
| Synapse_PPI_Communities | Syn-3_0_2312 | 10138  | YAF2     |
| Synapse_PPI_Communities | Syn-3_0_2312 | 5813   | PURA     |
| Synapse_PPI_Communities | Syn-3_0_2312 | 27332  | ZNF638   |
| Synapse_PPI_Communities | Syn-3_0_2312 | 64949  | MRPS26   |
| Synapse_PPI_Communities | Syn-3_0_2312 | 56342  | PPAN     |
| Synapse_PPI_Communities | Syn-3_0_2312 | 23107  | MRPS27   |
| Synapse_PPI_Communities | Syn-3_0_2312 | 9801   | MRPL19   |
| Synapse_PPI_Communities | Syn-3_0_2312 | 7307   | U2AF1    |
| Synapse_PPI_Communities | Syn-3_0_2312 | 26090  | ABHD12   |
| Synapse_PPI_Communities | Syn-3_0_2312 | 9184   | BUB3     |
| Synapse_PPI_Communities | Syn-3_0_2312 | 80185  | TTI2     |
| Synapse_PPI_Communities | Syn-3_0_2312 | 10016  | PDCD6    |
| Synapse_PPI_Communities | Syn-3_0_2312 | 6182   | MRPL12   |
| Synapse_PPI_Communities | Syn-3_0_2312 | 8106   | PABPN1   |
| Synapse_PPI_Communities | Syn-3_0_2312 | 3959   | LGALS3BP |
| Synapse_PPI_Communities | Syn-3_0_2312 | 5328   | PLAU     |
| Synapse_PPI_Communities | Syn-3_0_2312 | 56829  | ZC3HAV1  |
| Synapse_PPI_Communities | Syn-3_0_2312 | 8566   | PDXK     |
| Synapse_PPI_Communities | Syn-3_0_2312 | 2926   | GRSF1    |
| Synapse_PPI_Communities | Syn-3_0_2312 | 6432   | SRSF7    |
| Synapse_PPI_Communities | Syn-3_0_2312 | 3311   | HSPA7    |
| Synapse_PPI_Communities | Syn-3_0_2312 | 79077  | DCTPP1   |
| Synapse_PPI_Communities | Syn-3_0_2312 | 78994  | PRR14    |
| Synapse_PPI_Communities | Syn-3_0_2312 | 55707  | NECAP2   |
| Synapse_PPI_Communities | Syn-3_0_2312 | 54431  | DNAJC10  |
| Synapse_PPI_Communities | Syn-3_0_2312 | 6812   | STXBP1   |
| Synapse_PPI_Communities | Syn-3_0_2312 | 94121  | SYTL4    |
| Synapse_PPI_Communities | Syn-3_0_2312 | 5874   | RAB27B   |
| Synapse_PPI_Communities | Syn-3_0_2312 | 9495   | AKAP5    |
| Synapse_PPI_Communities | Syn-3_0_2312 | 2562   | GABRB3   |
| Synapse_PPI_Communities | Syn-3_0_2312 | 2775   | GNAO1    |
| Synapse_PPI_Communities | Syn-3_0_2312 | 4985   | OPRD1    |
| Synapse_PPI_Communities | Syn-3_0_2312 | 4988   | OPRM1    |
| Synapse_PPI_Communities | Syn-3_0_2312 | 84675  | TRIM55   |
| Synapse_PPI_Communities | Syn-3_0_2312 | 9564   | BCAR1    |
| Synapse_PPI_Communities | Syn-3_0_2312 | 2983   | GUCY1B3  |
| Synapse_PPI_Communities | Syn-3_0_2312 | 3738   | KCNA3    |
| Synapse_PPI_Communities | Syn-3_0_2312 | 3736   | KCNA1    |
| Synapse_PPI_Communities | Syn-3_0_2312 | 3737   | KCNA2    |
| Synapse_PPI_Communities | Syn-3_0_2312 | 3739   | KCNA4    |
| Synapse_PPI_Communities | Syn-3_0_2312 | 10928  | RALBP1   |
| Synapse_PPI_Communities | Syn-3_0_2312 | 1677   | DFFB     |
| Synapse_PPI_Communities | Syn-3_0_2312 | 3956   | LGALS1   |
| Synapse_PPI_Communities | Syn-3_0_2312 | 5792   | PTPRF    |
| Synapse_PPI_Communities | Syn-3_0_2312 | 9454   | HOMER3   |
| Synapse_PPI_Communities | Syn-3_0_2312 | 4216   | MAP3K4   |
| Synapse_PPI_Communities | Syn-3_0_2312 | 23291  | FBXW11   |
| Synapse_PPI_Communities | Syn-3_0_2312 | 5682   | PSMA1    |
| Synapse_PPI_Communities | Syn-3_0_2312 | 221092 | HNRNPUL2 |
| Synapse_PPI_Communities | Syn-3_0_2312 | 10043  | TOM1     |
| Synapse_PPI_Communities | Syn-3_0_2312 | 83940  | TATDN1   |
| Synapse_PPI_Communities | Syn-3_0_2312 | 51366  | UBR5     |
| Synapse_PPI_Communities | Syn-3_0_2312 | 84676  | TRIM63   |

|                         |              |        |          |
|-------------------------|--------------|--------|----------|
| Synapse_PPI_Communities | Syn-3_0_2312 | 7094   | TLN1     |
| Synapse_PPI_Communities | Syn-3_0_2312 | 7141   | TNP1     |
| Synapse_PPI_Communities | Syn-3_0_2312 | 6050   | RNH1     |
| Synapse_PPI_Communities | Syn-3_0_2312 | 10498  | CARM1    |
| Synapse_PPI_Communities | Syn-3_0_2312 | 9530   | BAG4     |
| Synapse_PPI_Communities | Syn-3_0_2312 | 51003  | MED31    |
| Synapse_PPI_Communities | Syn-3_0_2312 | 8676   | STX11    |
| Synapse_PPI_Communities | Syn-3_0_2312 | 8683   | SRSF9    |
| Synapse_PPI_Communities | Syn-3_0_2312 | 537    | ATP6AP1  |
| Synapse_PPI_Communities | Syn-3_0_2312 | 29789  | OLA1     |
| Synapse_PPI_Communities | Syn-3_0_2312 | 83983  | TSSK6    |
| Synapse_PPI_Communities | Syn-3_0_2312 | 55621  | TRMT1    |
| Synapse_PPI_Communities | Syn-3_0_2312 | 27072  | VPS41    |
| Synapse_PPI_Communities | Syn-3_0_2312 | 5495   | PPM1B    |
| Synapse_PPI_Communities | Syn-3_0_2312 | 4082   | MARCKS   |
| Synapse_PPI_Communities | Syn-3_0_2312 | 29978  | UBQLN2   |
| Synapse_PPI_Communities | Syn-3_0_2312 | 84617  | TUBB6    |
| Synapse_PPI_Communities | Syn-3_0_2312 | 6597   | SMARCA4  |
| Synapse_PPI_Communities | Syn-3_0_2312 | 8350   | HIST1H3A |
| Synapse_PPI_Communities | Syn-3_0_2312 | 6091   | ROBO1    |
| Synapse_PPI_Communities | Syn-3_0_2312 | 6238   | RRBP1    |
| Synapse_PPI_Communities | Syn-3_0_2312 | 4701   | NDUFA7   |
| Synapse_PPI_Communities | Syn-3_0_2312 | 90678  | LRSAM1   |
| Synapse_PPI_Communities | Syn-3_0_2312 | 171024 | SYNPO2   |
| Synapse_PPI_Communities | Syn-3_0_2312 | 10988  | METAP2   |
| Synapse_PPI_Communities | Syn-3_0_2312 | 153769 | SH3RF2   |
| Synapse_PPI_Communities | Syn-3_0_2312 | 9892   | SNAP91   |
| Synapse_PPI_Communities | Syn-3_0_2312 | 2060   | EPS15    |
| Synapse_PPI_Communities | Syn-3_0_2312 | 51116  | MRPS2    |
| Synapse_PPI_Communities | Syn-3_0_2312 | 50944  | SHANK1   |
| Synapse_PPI_Communities | Syn-3_0_2312 | 85358  | SHANK3   |
| Synapse_PPI_Communities | Syn-3_0_2312 | 26156  | RSL1D1   |
| Synapse_PPI_Communities | Syn-3_0_2312 | 320    | APBA1    |
| Synapse_PPI_Communities | Syn-3_0_2312 | 55327  | LIN7C    |
| Synapse_PPI_Communities | Syn-3_0_2312 | 5534   | PPP3R1   |
| Synapse_PPI_Communities | Syn-3_0_2312 | 7187   | TRAF3    |
| Synapse_PPI_Communities | Syn-3_0_2312 | 7518   | XRCC4    |
| Synapse_PPI_Communities | Syn-3_0_2312 | 6708   | SPTA1    |
| Synapse_PPI_Communities | Syn-3_0_2312 | 64965  | MRPS9    |
| Synapse_PPI_Communities | Syn-3_0_2312 | 10262  | SF3B4    |
| Synapse_PPI_Communities | Syn-3_0_2312 | 1965   | EIF2S1   |
| Synapse_PPI_Communities | Syn-3_0_2312 | 80349  | WDR61    |
| Synapse_PPI_Communities | Syn-3_0_2312 | 1487   | CTBP1    |
| Synapse_PPI_Communities | Syn-3_0_2312 | 8467   | SMARCA5  |
| Synapse_PPI_Communities | Syn-3_0_2312 | 9672   | SDC3     |
| Synapse_PPI_Communities | Syn-3_0_2312 | 3149   | HMGB3    |
| Synapse_PPI_Communities | Syn-3_0_2312 | 5929   | RBBP5    |
| Synapse_PPI_Communities | Syn-3_0_2312 | 11222  | MRPL3    |
| Synapse_PPI_Communities | Syn-3_0_2312 | 29761  | USP25    |
| Synapse_PPI_Communities | Syn-3_0_2312 | 3030   | HADHA    |
| Synapse_PPI_Communities | Syn-3_0_2312 | 10196  | PRMT3    |
| Synapse_PPI_Communities | Syn-3_0_2312 | 9527   | GOSR1    |
| Synapse_PPI_Communities | Syn-3_0_2312 | 3761   | KCNJ4    |
| Synapse_PPI_Communities | Syn-3_0_2312 | 57510  | XPO5     |
| Synapse_PPI_Communities | Syn-3_0_2312 | 51520  | LARS     |
| Synapse_PPI_Communities | Syn-3_0_2312 | 7453   | WARS     |
| Synapse_PPI_Communities | Syn-3_0_2312 | 2975   | GTF3C1   |
| Synapse_PPI_Communities | Syn-3_0_2312 | 11235  | PDCD10   |

|                         |              |        |          |
|-------------------------|--------------|--------|----------|
| Synapse_PPI_Communities | Syn-3_0_2312 | 22803  | XRN2     |
| Synapse_PPI_Communities | Syn-3_0_2312 | 6532   | SLC6A4   |
| Synapse_PPI_Communities | Syn-3_0_2312 | 7535   | ZAP70    |
| Synapse_PPI_Communities | Syn-3_0_2312 | 27330  | RPS6KA6  |
| Synapse_PPI_Communities | Syn-3_0_2312 | 4155   | MBP      |
| Synapse_PPI_Communities | Syn-3_0_2312 | 23236  | PLCB1    |
| Synapse_PPI_Communities | Syn-3_0_2312 | 3782   | KCNN3    |
| Synapse_PPI_Communities | Syn-3_0_2312 | 55234  | SMU1     |
| Synapse_PPI_Communities | Syn-3_0_2312 | 3840   | KPNA4    |
| Synapse_PPI_Communities | Syn-3_0_2312 | 572    | BAD      |
| Synapse_PPI_Communities | Syn-3_0_2312 | 3655   | ITGA6    |
| Synapse_PPI_Communities | Syn-3_0_2312 | 2289   | FKBP5    |
| Synapse_PPI_Communities | Syn-3_0_2312 | 6502   | SKP2     |
| Synapse_PPI_Communities | Syn-3_0_2312 | 5500   | PPP1CB   |
| Synapse_PPI_Communities | Syn-3_0_2312 | 3054   | HCFC1    |
| Synapse_PPI_Communities | Syn-3_0_2312 | 3949   | LDLR     |
| Synapse_PPI_Communities | Syn-3_0_2312 | 8764   | TNFRSF14 |
| Synapse_PPI_Communities | Syn-3_0_2312 | 80705  | TSGA10   |
| Synapse_PPI_Communities | Syn-3_0_2312 | 56924  | PAK6     |
| Synapse_PPI_Communities | Syn-3_0_2312 | 11021  | RAB35    |
| Synapse_PPI_Communities | Syn-3_0_2312 | 9519   | TBPL1    |
| Synapse_PPI_Communities | Syn-3_0_2312 | 51119  | SBDS     |
| Synapse_PPI_Communities | Syn-3_0_2312 | 5795   | PTPRJ    |
| Synapse_PPI_Communities | Syn-3_0_2312 | 10946  | SF3A3    |
| Synapse_PPI_Communities | Syn-3_0_2312 | 8570   | KHSRP    |
| Synapse_PPI_Communities | Syn-3_0_2312 | 7538   | ZFP36    |
| Synapse_PPI_Communities | Syn-3_0_2312 | 4008   | LMO7     |
| Synapse_PPI_Communities | Syn-3_0_2312 | 1861   | TOR1A    |
| Synapse_PPI_Communities | Syn-3_0_2312 | 3868   | KRT16    |
| Synapse_PPI_Communities | Syn-3_0_2312 | 7123   | CLEC3B   |
| Synapse_PPI_Communities | Syn-3_0_2312 | 311    | ANXA11   |
| Synapse_PPI_Communities | Syn-3_0_2312 | 6813   | STXBP2   |
| Synapse_PPI_Communities | Syn-3_0_2312 | 306    | ANXA3    |
| Synapse_PPI_Communities | Syn-3_0_2312 | 10439  | OLFM1    |
| Synapse_PPI_Communities | Syn-3_0_2312 | 4300   | MLLT3    |
| Synapse_PPI_Communities | Syn-3_0_2312 | 7048   | TGFBR2   |
| Synapse_PPI_Communities | Syn-3_0_2312 | 2629   | GBA      |
| Synapse_PPI_Communities | Syn-3_0_2312 | 435    | ASL      |
| Synapse_PPI_Communities | Syn-3_0_2312 | 3702   | ITK      |
| Synapse_PPI_Communities | Syn-3_0_2312 | 4306   | NR3C2    |
| Synapse_PPI_Communities | Syn-3_0_2312 | 51141  | INSIG2   |
| Synapse_PPI_Communities | Syn-3_0_2312 | 79885  | HDAC11   |
| Synapse_PPI_Communities | Syn-3_0_2312 | 80342  | TRAF3IP3 |
| Synapse_PPI_Communities | Syn-3_0_2312 | 23576  | DDAH1    |
| Synapse_PPI_Communities | Syn-3_0_2312 | 23210  | JMJD6    |
| Synapse_PPI_Communities | Syn-3_0_2312 | 6300   | MAPK12   |
| Synapse_PPI_Communities | Syn-3_0_2312 | 50809  | HP1BP3   |
| Synapse_PPI_Communities | Syn-3_0_2312 | 84254  | CAMKK1   |
| Synapse_PPI_Communities | Syn-3_0_2312 | 51202  | DDX47    |
| Synapse_PPI_Communities | Syn-3_0_2312 | 81624  | DIAPH3   |
| Synapse_PPI_Communities | Syn-3_0_2312 | 51150  | SDF4     |
| Synapse_PPI_Communities | Syn-3_0_2312 | 3055   | HCK      |
| Synapse_PPI_Communities | Syn-3_0_2312 | 9689   | BZW1     |
| Synapse_PPI_Communities | Syn-3_0_2312 | 112858 | TP53RK   |
| Synapse_PPI_Communities | Syn-3_0_2312 | 10868  | USP20    |
| Synapse_PPI_Communities | Syn-3_0_2312 | 2935   | GSPT1    |
| Synapse_PPI_Communities | Syn-3_0_2312 | 373156 | GSTK1    |
| Synapse_PPI_Communities | Syn-3_0_2312 | 117246 | FTSJ3    |

|                         |              |        |          |
|-------------------------|--------------|--------|----------|
| Synapse_PPI_Communities | Syn-3_0_2312 | 6993   | DYNLT1   |
| Synapse_PPI_Communities | Syn-3_0_2312 | 1783   | DYNC1LI2 |
| Synapse_PPI_Communities | Syn-3_0_2312 | 2475   | MTOR     |
| Synapse_PPI_Communities | Syn-3_0_2312 | 1981   | EIF4G1   |
| Synapse_PPI_Communities | Syn-3_0_2312 | 23380  | SRGAP2   |
| Synapse_PPI_Communities | Syn-3_0_2312 | 10769  | PLK2     |
| Synapse_PPI_Communities | Syn-3_0_2312 | 54477  | PLEKHA5  |
| Synapse_PPI_Communities | Syn-3_0_2312 | 23049  | SMG1     |
| Synapse_PPI_Communities | Syn-3_0_2312 | 51073  | MRPL4    |
| Synapse_PPI_Communities | Syn-3_0_2312 | 11073  | TOPBP1   |
| Synapse_PPI_Communities | Syn-3_0_2312 | 682    | BSG      |
| Synapse_PPI_Communities | Syn-3_0_2312 | 51665  | ASB1     |
| Synapse_PPI_Communities | Syn-3_0_2312 | 6919   | TCEA2    |
| Synapse_PPI_Communities | Syn-3_0_2312 | 10713  | USP39    |
| Synapse_PPI_Communities | Syn-3_0_2312 | 1114   | CHGB     |
| Synapse_PPI_Communities | Syn-3_0_2312 | 159    | ADSS     |
| Synapse_PPI_Communities | Syn-3_0_2312 | 83464  | APH1B    |
| Synapse_PPI_Communities | Syn-3_0_2312 | 25855  | BRMS1    |
| Synapse_PPI_Communities | Syn-3_0_2312 | 11244  | ZHX1     |
| Synapse_PPI_Communities | Syn-3_0_2312 | 54919  | HEATR2   |
| Synapse_PPI_Communities | Syn-3_0_2312 | 4597   | MVD      |
| Synapse_PPI_Communities | Syn-3_0_2312 | 11065  | UBE2C    |
| Synapse_PPI_Communities | Syn-3_0_2312 | 3251   | HPRT1    |
| Synapse_PPI_Communities | Syn-3_0_2312 | 10923  | SUB1     |
| Synapse_PPI_Communities | Syn-3_0_2312 | 10570  | DPYSL4   |
| Synapse_PPI_Communities | Syn-3_0_2312 | 5800   | PTPRO    |
| Synapse_PPI_Communities | Syn-3_0_2312 | 51676  | ASB2     |
| Synapse_PPI_Communities | Syn-3_0_2312 | 10260  | DENND4A  |
| Synapse_PPI_Communities | Syn-3_0_2312 | 5985   | RFC5     |
| Synapse_PPI_Communities | Syn-3_0_2312 | 1198   | CLK3     |
| Synapse_PPI_Communities | Syn-3_0_2312 | 51130  | ASB3     |
| Synapse_PPI_Communities | Syn-3_0_2312 | 2261   | FGFR3    |
| Synapse_PPI_Communities | Syn-3_0_2312 | 7433   | VIPR1    |
| Synapse_PPI_Communities | Syn-3_0_2312 | 10956  | OS9      |
| Synapse_PPI_Communities | Syn-3_0_2312 | 140459 | ASB6     |
| Synapse_PPI_Communities | Syn-3_0_2312 | 57698  | KIAA1598 |
| Synapse_PPI_Communities | Syn-3_0_2312 | 8195   | MKKS     |
| Synapse_PPI_Communities | Syn-3_0_2312 | 11329  | STK38    |
| Synapse_PPI_Communities | Syn-3_0_2312 | 83481  | EPPK1    |
| Synapse_PPI_Communities | Syn-3_0_2312 | 5445   | PON2     |
| Synapse_PPI_Communities | Syn-3_0_2312 | 4281   | MID1     |
| Synapse_PPI_Communities | Syn-3_0_2312 | 54487  | DGCR8    |
| Synapse_PPI_Communities | Syn-3_0_2312 | 8850   | KAT2B    |
| Synapse_PPI_Communities | Syn-3_0_2312 | 64785  | GINS3    |
| Synapse_PPI_Communities | Syn-3_0_2312 | 56254  | RNF20    |
| Synapse_PPI_Communities | Syn-3_0_2312 | 79577  | CDC73    |
| Synapse_PPI_Communities | Syn-3_0_2312 | 26578  | OSTF1    |
| Synapse_PPI_Communities | Syn-3_0_2312 | 27020  | NPTN     |
| Synapse_PPI_Communities | Syn-3_0_2312 | 51651  | PTRH2    |
| Synapse_PPI_Communities | Syn-3_0_2312 | 11331  | PHB2     |
| Synapse_PPI_Communities | Syn-3_0_2312 | 5586   | PKN2     |
| Synapse_PPI_Communities | Syn-3_0_2312 | 829    | CAPZA1   |
| Synapse_PPI_Communities | Syn-3_0_2312 | 5877   | RABIF    |
| Synapse_PPI_Communities | Syn-3_0_2312 | 376267 | RAB15    |
| Synapse_PPI_Communities | Syn-3_0_2312 | 5306   | PITPNA   |
| Synapse_PPI_Communities | Syn-3_0_2312 | 9908   | G3BP2    |
| Synapse_PPI_Communities | Syn-3_0_2312 | 10289  | EIF1B    |
| Synapse_PPI_Communities | Syn-3_0_2312 | 8883   | NAE1     |

|                         |              |        |         |
|-------------------------|--------------|--------|---------|
| Synapse_PPI_Communities | Syn-3_0_2312 | 259249 | MRGPRX1 |
| Synapse_PPI_Communities | Syn-3_0_2312 | 9098   | USP6    |
| Synapse_PPI_Communities | Syn-3_0_2312 | 5139   | PDE3A   |
| Synapse_PPI_Communities | Syn-3_0_2312 | 10525  | HYOU1   |
| Synapse_PPI_Communities | Syn-3_0_2312 | 54850  | FBXL12  |
| Synapse_PPI_Communities | Syn-3_0_2312 | 642    | BLMH    |
| Synapse_PPI_Communities | Syn-3_0_2312 | 54843  | SYTL2   |
| Synapse_PPI_Communities | Syn-3_0_2312 | 55794  | DDX28   |
| Synapse_PPI_Communities | Syn-3_0_2312 | 10197  | PSME3   |
| Synapse_PPI_Communities | Syn-3_0_2312 | 23708  | GSPT2   |
| Synapse_PPI_Communities | Syn-3_0_2312 | 8148   | TAF15   |
| Synapse_PPI_Communities | Syn-3_0_2312 | 3910   | LAMA4   |
| Synapse_PPI_Communities | Syn-3_0_2312 | 11137  | PWP1    |
| Synapse_PPI_Communities | Syn-3_0_2312 | 24138  | IFIT5   |
| Synapse_PPI_Communities | Syn-3_0_2312 | 2274   | FHL2    |
| Synapse_PPI_Communities | Syn-3_0_2312 | 6871   | TADA2A  |
| Synapse_PPI_Communities | Syn-3_0_2312 | 3267   | AGFG1   |
| Synapse_PPI_Communities | Syn-3_0_2312 | 51776  | ZAK     |
| Synapse_PPI_Communities | Syn-3_0_2312 | 51491  | NOP16   |
| Synapse_PPI_Communities | Syn-3_0_2312 | 55379  | LRRCS9  |
| Synapse_PPI_Communities | Syn-3_0_2312 | 26031  | OSBPL3  |
| Synapse_PPI_Communities | Syn-3_0_2312 | 1558   | CYP2C8  |
| Synapse_PPI_Communities | Syn-3_0_2312 | 64969  | MRPS5   |
| Synapse_PPI_Communities | Syn-3_0_2312 | 4358   | MPV17   |
| Synapse_PPI_Communities | Syn-3_0_2312 | 6643   | SNX2    |
| Synapse_PPI_Communities | Syn-3_0_2312 | 6185   | RPN2    |
| Synapse_PPI_Communities | Syn-3_0_2312 | 30845  | EHD3    |
| Synapse_PPI_Communities | Syn-3_0_2312 | 8660   | IRS2    |
| Synapse_PPI_Communities | Syn-3_0_2312 | 7779   | SLC30A1 |
| Synapse_PPI_Communities | Syn-3_0_2312 | 4615   | MYD88   |
| Synapse_PPI_Communities | Syn-3_0_2312 | 11311  | VPS45   |
| Synapse_PPI_Communities | Syn-3_0_2312 | 51808  | PHAX    |
| Synapse_PPI_Communities | Syn-3_0_2312 | 10594  | PRPF8   |
| Synapse_PPI_Communities | Syn-3_0_2312 | 660    | BMX     |
| Synapse_PPI_Communities | Syn-3_0_2312 | 2064   | ERBB2   |
| Synapse_PPI_Communities | Syn-3_0_2312 | 11212  | PROSC   |
| Synapse_PPI_Communities | Syn-3_0_2312 | 57732  | ZFYVE28 |
| Synapse_PPI_Communities | Syn-3_0_2312 | 286    | ANK1    |
| Synapse_PPI_Communities | Syn-3_0_2312 | 50488  | MINK1   |
| Synapse_PPI_Communities | Syn-3_0_2312 | 5976   | UPF1    |
| Synapse_PPI_Communities | Syn-3_0_2312 | 8880   | FUBP1   |
| Synapse_PPI_Communities | Syn-3_0_2312 | 6790   | AURKA   |
| Synapse_PPI_Communities | Syn-3_0_2312 | 54840  | APTX    |
| Synapse_PPI_Communities | Syn-3_0_2312 | 10746  | MAP3K2  |
| Synapse_PPI_Communities | Syn-3_0_2312 | 5434   | POLR2E  |
| Synapse_PPI_Communities | Syn-3_0_2312 | 8165   | AKAP1   |
| Synapse_PPI_Communities | Syn-3_0_2312 | 7124   | TNF     |
| Synapse_PPI_Communities | Syn-3_0_2312 | 6836   | SURF4   |
| Synapse_PPI_Communities | Syn-3_0_2312 | 11171  | STRAP   |
| Synapse_PPI_Communities | Syn-3_0_2312 | 51566  | ARMCX3  |
| Synapse_PPI_Communities | Syn-3_0_2312 | 6642   | SNX1    |
| Synapse_PPI_Communities | Syn-3_0_2312 | 9212   | AURKB   |
| Synapse_PPI_Communities | Syn-3_0_2312 | 407    | ARR3    |
| Synapse_PPI_Communities | Syn-3_0_2312 | 3784   | KCNQ1   |
| Synapse_PPI_Communities | Syn-3_0_2312 | 7273   | TTN     |
| Synapse_PPI_Communities | Syn-3_0_2312 | 5982   | RFC2    |
| Synapse_PPI_Communities | Syn-3_0_2312 | 6648   | SOD2    |
| Synapse_PPI_Communities | Syn-3_0_2312 | 6301   | SARS    |

|                         |              |        |          |
|-------------------------|--------------|--------|----------|
| Synapse_PPI_Communities | Syn-3_0_2312 | 51593  | SRRT     |
| Synapse_PPI_Communities | Syn-3_0_2312 | 148867 | SLC30A7  |
| Synapse_PPI_Communities | Syn-3_0_2312 | 3007   | HIST1H1D |
| Synapse_PPI_Communities | Syn-3_0_2312 | 10992  | SF3B2    |
| Synapse_PPI_Communities | Syn-3_0_2312 | 29767  | TMOD2    |
| Synapse_PPI_Communities | Syn-3_0_2312 | 4780   | NFE2L2   |
| Synapse_PPI_Communities | Syn-3_0_2312 | 5833   | PCYT2    |
| Synapse_PPI_Communities | Syn-3_0_2312 | 2670   | GFAP     |
| Synapse_PPI_Communities | Syn-3_0_2312 | 6804   | STX1A    |
| Synapse_PPI_Communities | Syn-3_0_2312 | 6855   | SYP      |
| Synapse_PPI_Communities | Syn-3_0_2312 | 56902  | PNO1     |
| Synapse_PPI_Communities | Syn-3_0_2312 | 6599   | SMARCC1  |
| Synapse_PPI_Communities | Syn-3_0_2312 | 5527   | PPP2R5C  |
| Synapse_PPI_Communities | Syn-3_0_2312 | 27316  | RBMX     |
| Synapse_PPI_Communities | Syn-3_0_2312 | 23184  | MESDC2   |
| Synapse_PPI_Communities | Syn-3_0_2312 | 10425  | ARIH2    |
| Synapse_PPI_Communities | Syn-3_0_2312 | 800    | CALD1    |
| Synapse_PPI_Communities | Syn-3_0_2312 | 29115  | SAP30BP  |
| Synapse_PPI_Communities | Syn-3_0_2312 | 355    | FAS      |
| Synapse_PPI_Communities | Syn-3_0_2312 | 5110   | PCMT1    |
| Synapse_PPI_Communities | Syn-3_0_2312 | 3336   | HSPE1    |
| Synapse_PPI_Communities | Syn-3_0_2312 | 689    | BTF3     |
| Synapse_PPI_Communities | Syn-3_0_2312 | 10724  | MGEA5    |
| Synapse_PPI_Communities | Syn-3_0_2312 | 10533  | ATG7     |
| Synapse_PPI_Communities | Syn-3_0_2312 | 10008  | KCNE3    |
| Synapse_PPI_Communities | Syn-3_0_2312 | 5720   | PSME1    |
| Synapse_PPI_Communities | Syn-3_0_2312 | 23139  | MAST2    |
| Synapse_PPI_Communities | Syn-3_0_2312 | 7070   | THY1     |
| Synapse_PPI_Communities | Syn-3_0_2312 | 84324  | SARNP    |
| Synapse_PPI_Communities | Syn-3_0_2312 | 4190   | MDH1     |
| Synapse_PPI_Communities | Syn-3_0_2312 | 6389   | SDHA     |
| Synapse_PPI_Communities | Syn-3_0_2312 | 5481   | PPID     |
| Synapse_PPI_Communities | Syn-3_0_2312 | 1429   | CRYZ     |
| Synapse_PPI_Communities | Syn-3_0_2312 | 140576 | S100A16  |
| Synapse_PPI_Communities | Syn-3_0_2312 | 55658  | RNF126   |
| Synapse_PPI_Communities | Syn-3_0_2312 | 8237   | USP11    |
| Synapse_PPI_Communities | Syn-3_0_2312 | 3280   | HES1     |
| Synapse_PPI_Communities | Syn-3_0_2312 | 47     | ACLY     |
| Synapse_PPI_Communities | Syn-3_0_2312 | 4149   | MAX      |
| Synapse_PPI_Communities | Syn-3_0_2312 | 1741   | DLG3     |
| Synapse_PPI_Communities | Syn-3_0_2312 | 57555  | NLGN2    |
| Synapse_PPI_Communities | Syn-3_0_2312 | 54413  | NLGN3    |
| Synapse_PPI_Communities | Syn-3_0_2312 | 2318   | FLNC     |
| Synapse_PPI_Communities | Syn-3_0_2312 | 2309   | FOXO3    |
| Synapse_PPI_Communities | Syn-3_0_2312 | 509    | ATP5C1   |
| Synapse_PPI_Communities | Syn-3_0_2312 | 472    | ATM      |
| Synapse_PPI_Communities | Syn-3_0_2312 | 1978   | EIF4EBP1 |
| Synapse_PPI_Communities | Syn-3_0_2312 | 8536   | CAMK1    |
| Synapse_PPI_Communities | Syn-3_0_2312 | 10645  | CAMKK2   |
| Synapse_PPI_Communities | Syn-3_0_2312 | 2034   | EPAS1    |
| Synapse_PPI_Communities | Syn-3_0_2312 | 26047  | CNTNAP2  |
| Synapse_PPI_Communities | Syn-3_0_2312 | 23499  | MACF1    |
| Synapse_PPI_Communities | Syn-3_0_2312 | 6294   | SAFB     |
| Synapse_PPI_Communities | Syn-3_0_2312 | 5793   | PTPRG    |
| Synapse_PPI_Communities | Syn-3_0_2312 | 8500   | PPFIA1   |
| Synapse_PPI_Communities | Syn-3_0_2312 | 55227  | LRRC1    |
| Synapse_PPI_Communities | Syn-3_0_2312 | 10419  | PRMT5    |
| Synapse_PPI_Communities | Syn-3_0_2312 | 5610   | EIF2AK2  |

|                         |              |        |           |
|-------------------------|--------------|--------|-----------|
| Synapse_PPI_Communities | Syn-3_0_2312 | 8870   | IER3      |
| Synapse_PPI_Communities | Syn-3_0_2312 | 5272   | SERPINB9  |
| Synapse_PPI_Communities | Syn-3_0_2312 | 6829   | SUPT5H    |
| Synapse_PPI_Communities | Syn-3_0_2312 | 57223  | SMEK2     |
| Synapse_PPI_Communities | Syn-3_0_2312 | 55207  | ARL8B     |
| Synapse_PPI_Communities | Syn-3_0_2312 | 1394   | CRHR1     |
| Synapse_PPI_Communities | Syn-3_0_2312 | 25814  | ATXN10    |
| Synapse_PPI_Communities | Syn-3_0_2312 | 7450   | VWF       |
| Synapse_PPI_Communities | Syn-3_0_2312 | 55291  | PPP6R3    |
| Synapse_PPI_Communities | Syn-3_0_2312 | 6453   | ITSN1     |
| Synapse_PPI_Communities | Syn-3_0_2312 | 8871   | SYNJ2     |
| Synapse_PPI_Communities | Syn-3_0_2312 | 6434   | TRA2B     |
| Synapse_PPI_Communities | Syn-3_0_2312 | 5603   | MAPK13    |
| Synapse_PPI_Communities | Syn-3_0_2312 | 3667   | IRS1      |
| Synapse_PPI_Communities | Syn-3_0_2312 | 9611   | NCOR1     |
| Synapse_PPI_Communities | Syn-3_0_2312 | 8851   | CDK5R1    |
| Synapse_PPI_Communities | Syn-3_0_2312 | 10369  | CACNG2    |
| Synapse_PPI_Communities | Syn-3_0_2312 | 57473  | ZNF512B   |
| Synapse_PPI_Communities | Syn-3_0_2312 | 27429  | HTRA2     |
| Synapse_PPI_Communities | Syn-3_0_2312 | 5144   | PDE4D     |
| Synapse_PPI_Communities | Syn-3_0_2312 | 1647   | GADD45A   |
| Synapse_PPI_Communities | Syn-3_0_2312 | 7468   | WHSC1     |
| Synapse_PPI_Communities | Syn-3_0_2312 | 3297   | HSF1      |
| Synapse_PPI_Communities | Syn-3_0_2312 | 22824  | HSPA4L    |
| Synapse_PPI_Communities | Syn-3_0_2312 | 995    | CDC25C    |
| Synapse_PPI_Communities | Syn-3_0_2312 | 55737  | VPS35     |
| Synapse_PPI_Communities | Syn-3_0_2312 | 8892   | EIF2B2    |
| Synapse_PPI_Communities | Syn-3_0_2312 | 1399   | CRKL      |
| Synapse_PPI_Communities | Syn-3_0_2312 | 1121   | CHM       |
| Synapse_PPI_Communities | Syn-3_0_2312 | 5870   | RAB6A     |
| Synapse_PPI_Communities | Syn-3_0_2312 | 11200  | CHEK2     |
| Synapse_PPI_Communities | Syn-3_0_2312 | 7448   | VTN       |
| Synapse_PPI_Communities | Syn-3_0_2312 | 1759   | DNM1      |
| Synapse_PPI_Communities | Syn-3_0_2312 | 29763  | PACSIN3   |
| Synapse_PPI_Communities | Syn-3_0_2312 | 3872   | KRT17     |
| Synapse_PPI_Communities | Syn-3_0_2312 | 816    | CAMK2B    |
| Synapse_PPI_Communities | Syn-3_0_2312 | 226    | ALDOA     |
| Synapse_PPI_Communities | Syn-3_0_2312 | 5865   | RAB3B     |
| Synapse_PPI_Communities | Syn-3_0_2312 | 22841  | RAB11FIP2 |
| Synapse_PPI_Communities | Syn-3_0_2312 | 6720   | SREBF1    |
| Synapse_PPI_Communities | Syn-3_0_2312 | 10040  | TOM1L1    |
| Synapse_PPI_Communities | Syn-3_0_2312 | 6712   | SPTBN2    |
| Synapse_PPI_Communities | Syn-3_0_2312 | 1387   | CREBBP    |
| Synapse_PPI_Communities | Syn-3_0_2312 | 4688   | NCF2      |
| Synapse_PPI_Communities | Syn-3_0_2312 | 6383   | SDC2      |
| Synapse_PPI_Communities | Syn-3_0_2312 | 3861   | KRT14     |
| Synapse_PPI_Communities | Syn-3_0_2312 | 8202   | NCOA3     |
| Synapse_PPI_Communities | Syn-3_0_2312 | 6626   | SNRPA     |
| Synapse_PPI_Communities | Syn-3_0_2312 | 51474  | LIMA1     |
| Synapse_PPI_Communities | Syn-3_0_2312 | 26043  | UBXN7     |
| Synapse_PPI_Communities | Syn-3_0_2312 | 6559   | SLC12A3   |
| Synapse_PPI_Communities | Syn-3_0_2312 | 581    | BAX       |
| Synapse_PPI_Communities | Syn-3_0_2312 | 58     | ACTA1     |
| Synapse_PPI_Communities | Syn-3_0_2312 | 23406  | COTL1     |
| Synapse_PPI_Communities | Syn-3_0_2312 | 10910  | SUGT1     |
| Synapse_PPI_Communities | Syn-3_0_2312 | 3575   | IL7R      |
| Synapse_PPI_Communities | Syn-3_0_2312 | 117189 | GRDX      |
| Synapse_PPI_Communities | Syn-3_0_2312 | 51143  | DYNC1LI1  |



|                         |              |        |          |
|-------------------------|--------------|--------|----------|
| Synapse_PPI_Communities | Syn-3_0_2312 | 25824  | PRDX5    |
| Synapse_PPI_Communities | Syn-3_0_2312 | 81605  | URM1     |
| Synapse_PPI_Communities | Syn-3_0_2312 | 4217   | MAP3K5   |
| Synapse_PPI_Communities | Syn-3_0_2312 | 7322   | UBE2D2   |
| Synapse_PPI_Communities | Syn-3_0_2312 | 29927  | SEC61A1  |
| Synapse_PPI_Communities | Syn-3_0_2312 | 833    | CARS     |
| Synapse_PPI_Communities | Syn-3_0_2312 | 5451   | POU2F1   |
| Synapse_PPI_Communities | Syn-3_0_2312 | 3708   | ITPR1    |
| Synapse_PPI_Communities | Syn-3_0_2312 | 330    | BIRC3    |
| Synapse_PPI_Communities | Syn-3_0_2312 | 9554   | SEC22B   |
| Synapse_PPI_Communities | Syn-3_0_2312 | 51534  | VTA1     |
| Synapse_PPI_Communities | Syn-3_0_2312 | 5707   | PSMD1    |
| Synapse_PPI_Communities | Syn-3_0_2312 | 7249   | TSC2     |
| Synapse_PPI_Communities | Syn-3_0_2312 | 2648   | KAT2A    |
| Synapse_PPI_Communities | Syn-3_0_2312 | 3983   | ABLIM1   |
| Synapse_PPI_Communities | Syn-3_0_2312 | 50619  | DEF6     |
| Synapse_PPI_Communities | Syn-3_0_2312 | 3843   | IPO5     |
| Synapse_PPI_Communities | Syn-3_0_2312 | 7018   | TF       |
| Synapse_PPI_Communities | Syn-3_0_2312 | 23039  | XPO7     |
| Synapse_PPI_Communities | Syn-3_0_2312 | 9361   | LONP1    |
| Synapse_PPI_Communities | Syn-3_0_2312 | 9513   | FXR2     |
| Synapse_PPI_Communities | Syn-3_0_2312 | 7013   | TERF1    |
| Synapse_PPI_Communities | Syn-3_0_2312 | 5780   | PTPN9    |
| Synapse_PPI_Communities | Syn-3_0_2312 | 7158   | TP53BP1  |
| Synapse_PPI_Communities | Syn-3_0_2312 | 23256  | SCFD1    |
| Synapse_PPI_Communities | Syn-3_0_2312 | 53917  | RAB24    |
| Synapse_PPI_Communities | Syn-3_0_2312 | 57179  | KIAA1191 |
| Synapse_PPI_Communities | Syn-3_0_2312 | 5094   | PCBP2    |
| Synapse_PPI_Communities | Syn-3_0_2312 | 5290   | PIK3CA   |
| Synapse_PPI_Communities | Syn-3_0_2312 | 1447   | CSN2     |
| Synapse_PPI_Communities | Syn-3_0_2312 | 9482   | STX8     |
| Synapse_PPI_Communities | Syn-3_0_2312 | 10490  | VTI1B    |
| Synapse_PPI_Communities | Syn-3_0_2312 | 7311   | UBA52    |
| Synapse_PPI_Communities | Syn-3_0_2312 | 9113   | LATS1    |
| Synapse_PPI_Communities | Syn-3_0_2312 | 5573   | PRKAR1A  |
| Synapse_PPI_Communities | Syn-3_0_2312 | 898    | CCNE1    |
| Synapse_PPI_Communities | Syn-3_0_2312 | 9092   | SART1    |
| Synapse_PPI_Communities | Syn-3_0_2312 | 10036  | CHAF1A   |
| Synapse_PPI_Communities | Syn-3_0_2312 | 8666   | EIF3G    |
| Synapse_PPI_Communities | Syn-3_0_2312 | 9295   | SRSF11   |
| Synapse_PPI_Communities | Syn-3_0_2312 | 477    | ATP1A2   |
| Synapse_PPI_Communities | Syn-3_0_2312 | 81565  | NDEL1    |
| Synapse_PPI_Communities | Syn-3_0_2312 | 11252  | PACSN2   |
| Synapse_PPI_Communities | Syn-3_0_2312 | 6633   | SNRPD2   |
| Synapse_PPI_Communities | Syn-3_0_2312 | 3189   | HNRNP3   |
| Synapse_PPI_Communities | Syn-3_0_2312 | 26088  | GGA1     |
| Synapse_PPI_Communities | Syn-3_0_2312 | 891    | CCNB1    |
| Synapse_PPI_Communities | Syn-3_0_2312 | 8874   | ARHGEF7  |
| Synapse_PPI_Communities | Syn-3_0_2312 | 4751   | NEK2     |
| Synapse_PPI_Communities | Syn-3_0_2312 | 2550   | GABBR1   |
| Synapse_PPI_Communities | Syn-3_0_2312 | 5999   | RGS4     |
| Synapse_PPI_Communities | Syn-3_0_2312 | 10989  | IMMT     |
| Synapse_PPI_Communities | Syn-3_0_2312 | 2280   | FKBP1A   |
| Synapse_PPI_Communities | Syn-3_0_2312 | 7528   | YY1      |
| Synapse_PPI_Communities | Syn-3_0_2312 | 3125   | HLA-DRB3 |
| Synapse_PPI_Communities | Syn-3_0_2312 | 2560   | GABRB1   |
| Synapse_PPI_Communities | Syn-3_0_2312 | 25898  | RCHY1    |
| Synapse_PPI_Communities | Syn-3_0_2312 | 345651 | ACTBL2   |

|                         |              |        |           |
|-------------------------|--------------|--------|-----------|
| Synapse_PPI_Communities | Syn-3_0_2312 | 3725   | JUN       |
| Synapse_PPI_Communities | Syn-3_0_2312 | 25977  | NECAP1    |
| Synapse_PPI_Communities | Syn-3_0_2312 | 832    | CAPZB     |
| Synapse_PPI_Communities | Syn-3_0_2312 | 9061   | PAPSS1    |
| Synapse_PPI_Communities | Syn-3_0_2312 | 3005   | H1FO      |
| Synapse_PPI_Communities | Syn-3_0_2312 | 80331  | DNAJC5    |
| Synapse_PPI_Communities | Syn-3_0_2312 | 57122  | NUP107    |
| Synapse_PPI_Communities | Syn-3_0_2312 | 10949  | HNRNPA0   |
| Synapse_PPI_Communities | Syn-3_0_2312 | 7168   | TPM1      |
| Synapse_PPI_Communities | Syn-3_0_2312 | 5917   | RARS      |
| Synapse_PPI_Communities | Syn-3_0_2312 | 5007   | OSBP      |
| Synapse_PPI_Communities | Syn-3_0_2312 | 3315   | HSPB1     |
| Synapse_PPI_Communities | Syn-3_0_2312 | 1021   | CDK6      |
| Synapse_PPI_Communities | Syn-3_0_2312 | 375790 | AGRN      |
| Synapse_PPI_Communities | Syn-3_0_2312 | 439    | ASNA1     |
| Synapse_PPI_Communities | Syn-3_0_2312 | 9374   | PPT2      |
| Synapse_PPI_Communities | Syn-3_0_2312 | 545    | ATR       |
| Synapse_PPI_Communities | Syn-3_0_2312 | 10521  | DDX17     |
| Synapse_PPI_Communities | Syn-3_0_2312 | 373509 | USP50     |
| Synapse_PPI_Communities | Syn-3_0_2312 | 1018   | CDK3      |
| Synapse_PPI_Communities | Syn-3_0_2312 | 29904  | EEF2K     |
| Synapse_PPI_Communities | Syn-3_0_2312 | 5214   | PFKP      |
| Synapse_PPI_Communities | Syn-3_0_2312 | 1762   | DMWD      |
| Synapse_PPI_Communities | Syn-3_0_2312 | 55577  | NAGK      |
| Synapse_PPI_Communities | Syn-3_0_2312 | 147746 | HIPK4     |
| Synapse_PPI_Communities | Syn-3_0_2312 | 196541 | METTTL21C |
| Synapse_PPI_Communities | Syn-3_0_2312 | 10494  | STK25     |
| Synapse_PPI_Communities | Syn-3_0_2312 | 440574 | MINOS1    |
| Synapse_PPI_Communities | Syn-3_0_2312 | 5705   | PSMC5     |
| Synapse_PPI_Communities | Syn-3_0_2312 | 8445   | DYRK2     |
| Synapse_PPI_Communities | Syn-3_0_2312 | 7314   | UBB       |
| Synapse_PPI_Communities | Syn-3_0_2312 | 10486  | CAP2      |
| Synapse_PPI_Communities | Syn-3_0_2312 | 4173   | MCM4      |
| Synapse_PPI_Communities | Syn-3_0_2312 | 8554   | PIAS1     |
| Synapse_PPI_Communities | Syn-3_0_2312 | 84936  | ZFYVE19   |
| Synapse_PPI_Communities | Syn-3_0_2312 | 29937  | NENF      |
| Synapse_PPI_Communities | Syn-3_0_2312 | 8335   | HIST1H2AB |
| Synapse_PPI_Communities | Syn-3_0_2312 | 6854   | SYN2      |
| Synapse_PPI_Communities | Syn-3_0_2312 | 4259   | MGST3     |
| Synapse_PPI_Communities | Syn-3_0_2312 | 23077  | MYCBP2    |
| Synapse_PPI_Communities | Syn-3_0_2312 | 2931   | GSK3A     |
| Synapse_PPI_Communities | Syn-3_0_2312 | 9774   | BCLAF1    |
| Synapse_PPI_Communities | Syn-3_0_2312 | 11228  | RASSF8    |
| Synapse_PPI_Communities | Syn-3_0_2312 | 11098  | PRSS23    |
| Synapse_PPI_Communities | Syn-3_0_2312 | 2639   | GCDH      |
| Synapse_PPI_Communities | Syn-3_0_2312 | 5577   | PRKAR2B   |
| Synapse_PPI_Communities | Syn-3_0_2312 | 8615   | USO1      |
| Synapse_PPI_Communities | Syn-3_0_2312 | 50855  | PARD6A    |
| Synapse_PPI_Communities | Syn-3_0_2312 | 4363   | ABCC1     |
| Synapse_PPI_Communities | Syn-3_0_2312 | 775    | CACNA1C   |
| Synapse_PPI_Communities | Syn-3_0_2312 | 10206  | TRIM13    |
| Synapse_PPI_Communities | Syn-3_0_2312 | 1604   | CD55      |
| Synapse_PPI_Communities | Syn-3_0_2312 | 6430   | SRSF5     |
| Synapse_PPI_Communities | Syn-3_0_2312 | 9972   | NUP153    |
| Synapse_PPI_Communities | Syn-3_0_2312 | 51574  | LARP7     |
| Synapse_PPI_Communities | Syn-3_0_2312 | 6727   | SRP14     |
| Synapse_PPI_Communities | Syn-3_0_2312 | 9372   | ZFYVE9    |
| Synapse_PPI_Communities | Syn-3_0_2312 | 9188   | DDX21     |

|                         |              |       |          |
|-------------------------|--------------|-------|----------|
| Synapse_PPI_Communities | Syn-3_0_2312 | 2353  | FOS      |
| Synapse_PPI_Communities | Syn-3_0_2312 | 8994  | LIMD1    |
| Synapse_PPI_Communities | Syn-3_0_2312 | 5533  | PPP3CC   |
| Synapse_PPI_Communities | Syn-3_0_2312 | 6249  | CLIP1    |
| Synapse_PPI_Communities | Syn-3_0_2312 | 51663 | ZFR      |
| Synapse_PPI_Communities | Syn-3_0_2312 | 51015 | ISOC1    |
| Synapse_PPI_Communities | Syn-3_0_2312 | 5739  | PTGIR    |
| Synapse_PPI_Communities | Syn-3_0_2312 | 1314  | COPA     |
| Synapse_PPI_Communities | Syn-3_0_2312 | 3127  | HLA-DRB5 |
| Synapse_PPI_Communities | Syn-3_0_2312 | 11215 | AKAP11   |
| Synapse_PPI_Communities | Syn-3_0_2312 | 51564 | HDAC7    |
| Synapse_PPI_Communities | Syn-3_0_2312 | 3852  | KRT5     |
| Synapse_PPI_Communities | Syn-3_0_2312 | 79598 | CEP97    |
| Synapse_PPI_Communities | Syn-3_0_2312 | 23118 | TAB2     |
| Synapse_PPI_Communities | Syn-3_0_2312 | 1191  | CLU      |
| Synapse_PPI_Communities | Syn-3_0_2312 | 9093  | DNAJA3   |
| Synapse_PPI_Communities | Syn-3_0_2312 | 51726 | DNAJB11  |
| Synapse_PPI_Communities | Syn-3_0_2312 | 27101 | CACYBP   |
| Synapse_PPI_Communities | Syn-3_0_2312 | 60485 | SAV1     |
| Synapse_PPI_Communities | Syn-3_0_2312 | 10236 | HNRNPR   |
| Synapse_PPI_Communities | Syn-3_0_2312 | 3126  | HLA-DRB4 |
| Synapse_PPI_Communities | Syn-3_0_2312 | 23534 | TNPO3    |
| Synapse_PPI_Communities | Syn-3_0_2312 | 5692  | PSMB4    |
| Synapse_PPI_Communities | Syn-3_0_2312 | 9873  | FCHSD2   |
| Synapse_PPI_Communities | Syn-3_0_2312 | 11338 | U2AF2    |
| Synapse_PPI_Communities | Syn-3_0_2312 | 4189  | DNAJB9   |
| Synapse_PPI_Communities | Syn-3_0_2312 | 90627 | STARD13  |
| Synapse_PPI_Communities | Syn-3_0_2312 | 84078 | KBTD7    |
| Synapse_PPI_Communities | Syn-3_0_2312 | 26128 | KIAA1279 |
| Synapse_PPI_Communities | Syn-3_0_2312 | 83660 | TLN2     |
| Synapse_PPI_Communities | Syn-3_0_2312 | 6598  | SMARCB1  |
| Synapse_PPI_Communities | Syn-3_0_2312 | 3047  | HBG1     |
| Synapse_PPI_Communities | Syn-3_0_2312 | 6635  | SNRPE    |
| Synapse_PPI_Communities | Syn-3_0_2312 | 11031 | RAB31    |
| Synapse_PPI_Communities | Syn-3_0_2312 | 55573 | CDV3     |
| Synapse_PPI_Communities | Syn-3_0_2312 | 8473  | OGT      |
| Synapse_PPI_Communities | Syn-3_0_2312 | 823   | CAPN1    |
| Synapse_PPI_Communities | Syn-3_0_2312 | 8626  | TP63     |
| Synapse_PPI_Communities | Syn-3_0_2312 | 5829  | PXN      |
| Synapse_PPI_Communities | Syn-3_0_2312 | 4790  | NFKB1    |
| Synapse_PPI_Communities | Syn-3_0_2312 | 4131  | MAP1B    |
| Synapse_PPI_Communities | Syn-3_0_2312 | 65018 | PINK1    |
| Synapse_PPI_Communities | Syn-3_0_2312 | 10627 | MYL12A   |
| Synapse_PPI_Communities | Syn-3_0_2312 | 7298  | TYMS     |
| Synapse_PPI_Communities | Syn-3_0_2312 | 4926  | NUMA1    |
| Synapse_PPI_Communities | Syn-3_0_2312 | 80700 | UBXN6    |
| Synapse_PPI_Communities | Syn-3_0_2312 | 3146  | HMGB1    |
| Synapse_PPI_Communities | Syn-3_0_2312 | 64750 | SMURF2   |
| Synapse_PPI_Communities | Syn-3_0_2312 | 5962  | RDX      |
| Synapse_PPI_Communities | Syn-3_0_2312 | 10284 | SAP18    |
| Synapse_PPI_Communities | Syn-3_0_2312 | 1892  | ECHS1    |
| Synapse_PPI_Communities | Syn-3_0_2312 | 2271  | FH       |
| Synapse_PPI_Communities | Syn-3_0_2312 | 3984  | LIMK1    |
| Synapse_PPI_Communities | Syn-3_0_2312 | 64175 | LEPRE1   |
| Synapse_PPI_Communities | Syn-3_0_2312 | 23603 | CORO1C   |
| Synapse_PPI_Communities | Syn-3_0_2312 | 55869 | HDAC8    |
| Synapse_PPI_Communities | Syn-3_0_2312 | 7385  | UQCRC2   |
| Synapse_PPI_Communities | Syn-3_0_2312 | 5717  | PSMD11   |

|                         |              |        |          |
|-------------------------|--------------|--------|----------|
| Synapse_PPI_Communities | Syn-3_0_2312 | 8535   | CBX4     |
| Synapse_PPI_Communities | Syn-3_0_2312 | 254013 | METTL20  |
| Synapse_PPI_Communities | Syn-3_0_2312 | 151194 | METTL21A |
| Synapse_PPI_Communities | Syn-3_0_2312 | 3897   | L1CAM    |
| Synapse_PPI_Communities | Syn-3_0_2312 | 64786  | TBC1D15  |
| Synapse_PPI_Communities | Syn-3_0_2312 | 3337   | DNAJB1   |
| Synapse_PPI_Communities | Syn-3_0_2312 | 3551   | IKBKB    |
| Synapse_PPI_Communities | Syn-3_0_2312 | 85365  | ALG2     |
| Synapse_PPI_Communities | Syn-3_0_2312 | 3916   | LAMP1    |
| Synapse_PPI_Communities | Syn-3_0_2312 | 2185   | PTK2B    |
| Synapse_PPI_Communities | Syn-3_0_2312 | 7150   | TOP1     |
| Synapse_PPI_Communities | Syn-3_0_2312 | 29760  | BLNK     |
| Synapse_PPI_Communities | Syn-3_0_2312 | 830    | CAPZA2   |
| Synapse_PPI_Communities | Syn-3_0_2312 | 3849   | KRT2     |
| Synapse_PPI_Communities | Syn-3_0_2312 | 841    | CASP8    |
| Synapse_PPI_Communities | Syn-3_0_2312 | 2908   | NR3C1    |
| Synapse_PPI_Communities | Syn-3_0_2312 | 23410  | SIRT3    |
| Synapse_PPI_Communities | Syn-3_0_2312 | 6520   | SLC3A2   |
| Synapse_PPI_Communities | Syn-3_0_2312 | 8140   | SLC7A5   |
| Synapse_PPI_Communities | Syn-3_0_2312 | 55366  | LGR4     |
| Synapse_PPI_Communities | Syn-3_0_2312 | 6767   | ST13     |
| Synapse_PPI_Communities | Syn-3_0_2312 | 6446   | SGK1     |
| Synapse_PPI_Communities | Syn-3_0_2312 | 7015   | TERT     |
| Synapse_PPI_Communities | Syn-3_0_2312 | 356    | FASLG    |
| Synapse_PPI_Communities | Syn-3_0_2312 | 31     | ACACA    |
| Synapse_PPI_Communities | Syn-3_0_2312 | 27131  | SNX5     |
| Synapse_PPI_Communities | Syn-3_0_2312 | 8774   | NAPG     |
| Synapse_PPI_Communities | Syn-3_0_2312 | 4343   | MOV10    |
| Synapse_PPI_Communities | Syn-3_0_2312 | 5786   | PTPRA    |
| Synapse_PPI_Communities | Syn-3_0_2312 | 5019   | OXCT1    |
| Synapse_PPI_Communities | Syn-3_0_2312 | 5802   | PTPRS    |
| Synapse_PPI_Communities | Syn-3_0_2312 | 1984   | EIF5A    |
| Synapse_PPI_Communities | Syn-3_0_2312 | 2861   | GPR37    |
| Synapse_PPI_Communities | Syn-3_0_2312 | 7114   | TMSB4X   |
| Synapse_PPI_Communities | Syn-3_0_2312 | 1130   | LYST     |
| Synapse_PPI_Communities | Syn-3_0_2312 | 3689   | ITGB2    |
| Synapse_PPI_Communities | Syn-3_0_2312 | 5198   | PFAS     |
| Synapse_PPI_Communities | Syn-3_0_2312 | 7511   | XPNPEP1  |
| Synapse_PPI_Communities | Syn-3_0_2312 | 5701   | PSMC2    |
| Synapse_PPI_Communities | Syn-3_0_2312 | 10015  | PDCD6IP  |
| Synapse_PPI_Communities | Syn-3_0_2312 | 1786   | DNMT1    |
| Synapse_PPI_Communities | Syn-3_0_2312 | 6667   | SP1      |
| Synapse_PPI_Communities | Syn-3_0_2312 | 23400  | ATP13A2  |
| Synapse_PPI_Communities | Syn-3_0_2312 | 3660   | IRF2     |
| Synapse_PPI_Communities | Syn-3_0_2312 | 84557  | MAP1LC3A |
| Synapse_PPI_Communities | Syn-3_0_2312 | 4194   | MDM4     |
| Synapse_PPI_Communities | Syn-3_0_2312 | 54926  | UBE2R2   |
| Synapse_PPI_Communities | Syn-3_0_2312 | 5898   | RALA     |
| Synapse_PPI_Communities | Syn-3_0_2312 | 5912   | RAP2B    |
| Synapse_PPI_Communities | Syn-3_0_2312 | 7706   | TRIM25   |
| Synapse_PPI_Communities | Syn-3_0_2312 | 22931  | RAB18    |
| Synapse_PPI_Communities | Syn-3_0_2312 | 64857  | PLEKHG2  |
| Synapse_PPI_Communities | Syn-3_0_2312 | 23607  | CD2AP    |
| Synapse_PPI_Communities | Syn-3_0_2312 | 3123   | HLA-DRB1 |
| Synapse_PPI_Communities | Syn-3_0_2312 | 338    | APOB     |
| Synapse_PPI_Communities | Syn-3_0_2312 | 1453   | CSNK1D   |
| Synapse_PPI_Communities | Syn-3_0_2312 | 6721   | SREBF2   |
| Synapse_PPI_Communities | Syn-3_0_2312 | 134957 | STXBP5   |

|                         |              |        |          |
|-------------------------|--------------|--------|----------|
| Synapse_PPI_Communities | Syn-3_0_2312 | 5688   | PSMA7    |
| Synapse_PPI_Communities | Syn-3_0_2312 | 4176   | MCM7     |
| Synapse_PPI_Communities | Syn-3_0_2312 | 5162   | PDHB     |
| Synapse_PPI_Communities | Syn-3_0_2312 | 6601   | SMARCC2  |
| Synapse_PPI_Communities | Syn-3_0_2312 | 4168   | MCF2     |
| Synapse_PPI_Communities | Syn-3_0_2312 | 293    | SLC25A6  |
| Synapse_PPI_Communities | Syn-3_0_2312 | 5347   | PLK1     |
| Synapse_PPI_Communities | Syn-3_0_2312 | 84708  | LNX1     |
| Synapse_PPI_Communities | Syn-3_0_2312 | 6477   | SIAH1    |
| Synapse_PPI_Communities | Syn-3_0_2312 | 3122   | HLA-DRA  |
| Synapse_PPI_Communities | Syn-3_0_2312 | 7276   | TTR      |
| Synapse_PPI_Communities | Syn-3_0_2312 | 5685   | PSMA4    |
| Synapse_PPI_Communities | Syn-3_0_2312 | 2035   | EPB41    |
| Synapse_PPI_Communities | Syn-3_0_2312 | 197131 | UBR1     |
| Synapse_PPI_Communities | Syn-3_0_2312 | 11160  | ERLIN2   |
| Synapse_PPI_Communities | Syn-3_0_2312 | 5862   | RAB2A    |
| Synapse_PPI_Communities | Syn-3_0_2312 | 112464 | PRKCDBP  |
| Synapse_PPI_Communities | Syn-3_0_2312 | 10131  | TRAP1    |
| Synapse_PPI_Communities | Syn-3_0_2312 | 613    | BCR      |
| Synapse_PPI_Communities | Syn-3_0_2312 | 4234   | METTTL1  |
| Synapse_PPI_Communities | Syn-3_0_2312 | 142686 | ASB14    |
| Synapse_PPI_Communities | Syn-3_0_2312 | 4086   | SMAD1    |
| Synapse_PPI_Communities | Syn-3_0_2312 | 1147   | CHUK     |
| Synapse_PPI_Communities | Syn-3_0_2312 | 2956   | MSH6     |
| Synapse_PPI_Communities | Syn-3_0_2312 | 7073   | TIAL1    |
| Synapse_PPI_Communities | Syn-3_0_2312 | 5562   | PRKAA1   |
| Synapse_PPI_Communities | Syn-3_0_2312 | 10018  | BCL2L11  |
| Synapse_PPI_Communities | Syn-3_0_2312 | 7132   | TNFRSF1A |
| Synapse_PPI_Communities | Syn-3_0_2312 | 4355   | MPP2     |
| Synapse_PPI_Communities | Syn-3_0_2312 | 4436   | MSH2     |
| Synapse_PPI_Communities | Syn-3_0_2312 | 5873   | RAB27A   |
| Synapse_PPI_Communities | Syn-3_0_2312 | 347733 | TUBB2B   |
| Synapse_PPI_Communities | Syn-3_0_2312 | 79091  | METTTL2  |
| Synapse_PPI_Communities | Syn-3_0_2312 | 5108   | PCM1     |
| Synapse_PPI_Communities | Syn-3_0_2312 | 5430   | POLR2A   |
| Synapse_PPI_Communities | Syn-3_0_2312 | 7409   | VAV1     |
| Synapse_PPI_Communities | Syn-3_0_2312 | 554    | AVPR2    |
| Synapse_PPI_Communities | Syn-3_0_2312 | 54331  | GNG2     |
| Synapse_PPI_Communities | Syn-3_0_2312 | 5050   | PAFAH1B3 |
| Synapse_PPI_Communities | Syn-3_0_2312 | 3654   | IRAK1    |
| Synapse_PPI_Communities | Syn-3_0_2312 | 7408   | VASP     |
| Synapse_PPI_Communities | Syn-3_0_2312 | 4522   | MTHFD1   |
| Synapse_PPI_Communities | Syn-3_0_2312 | 5860   | QDPR     |
| Synapse_PPI_Communities | Syn-3_0_2312 | 5250   | SLC25A3  |
| Synapse_PPI_Communities | Syn-3_0_2312 | 3159   | HMGA1    |
| Synapse_PPI_Communities | Syn-3_0_2312 | 88     | ACTN2    |
| Synapse_PPI_Communities | Syn-3_0_2312 | 2904   | GRIN2B   |
| Synapse_PPI_Communities | Syn-3_0_2312 | 3717   | JAK2     |
| Synapse_PPI_Communities | Syn-3_0_2312 | 9997   | SCO2     |
| Synapse_PPI_Communities | Syn-3_0_2312 | 333    | APLP1    |
| Synapse_PPI_Communities | Syn-3_0_2312 | 5504   | PPP1R2   |
| Synapse_PPI_Communities | Syn-3_0_2312 | 10075  | HUWE1    |
| Synapse_PPI_Communities | Syn-3_0_2312 | 6472   | SHMT2    |
| Synapse_PPI_Communities | Syn-3_0_2312 | 9533   | POLR1C   |
| Synapse_PPI_Communities | Syn-3_0_2312 | 7283   | TUBG1    |
| Synapse_PPI_Communities | Syn-3_0_2312 | 23640  | HSPBP1   |
| Synapse_PPI_Communities | Syn-3_0_2312 | 5606   | MAP2K3   |
| Synapse_PPI_Communities | Syn-3_0_2312 | 27250  | PDCD4    |

|                         |              |        |          |
|-------------------------|--------------|--------|----------|
| Synapse_PPI_Communities | Syn-3_0_2312 | 6632   | SNRPD1   |
| Synapse_PPI_Communities | Syn-3_0_2312 | 7407   | VARS     |
| Synapse_PPI_Communities | Syn-3_0_2312 | 23677  | SH3BP4   |
| Synapse_PPI_Communities | Syn-3_0_2312 | 27338  | UBE2S    |
| Synapse_PPI_Communities | Syn-3_0_2312 | 2066   | ERBB4    |
| Synapse_PPI_Communities | Syn-3_0_2312 | 6853   | SYN1     |
| Synapse_PPI_Communities | Syn-3_0_2312 | 5921   | RASA1    |
| Synapse_PPI_Communities | Syn-3_0_2312 | 2175   | FANCA    |
| Synapse_PPI_Communities | Syn-3_0_2312 | 1855   | DVL1     |
| Synapse_PPI_Communities | Syn-3_0_2312 | 4092   | SMAD7    |
| Synapse_PPI_Communities | Syn-3_0_2312 | 1459   | CSNK2A2  |
| Synapse_PPI_Communities | Syn-3_0_2312 | 7159   | TP53BP2  |
| Synapse_PPI_Communities | Syn-3_0_2312 | 27339  | PRPF19   |
| Synapse_PPI_Communities | Syn-3_0_2312 | 10625  | IVNS1ABP |
| Synapse_PPI_Communities | Syn-3_0_2312 | 9643   | MORF4L2  |
| Synapse_PPI_Communities | Syn-3_0_2312 | 4311   | MME      |
| Synapse_PPI_Communities | Syn-3_0_2312 | 51138  | COPS4    |
| Synapse_PPI_Communities | Syn-3_0_2312 | 253260 | RICTOR   |
| Synapse_PPI_Communities | Syn-3_0_2312 | 10768  | AHCYL1   |
| Synapse_PPI_Communities | Syn-3_0_2312 | 3925   | STMN1    |
| Synapse_PPI_Communities | Syn-3_0_2312 | 983    | CDK1     |
| Synapse_PPI_Communities | Syn-3_0_2312 | 471    | ATIC     |
| Synapse_PPI_Communities | Syn-3_0_2312 | 6850   | SYK      |
| Synapse_PPI_Communities | Syn-3_0_2312 | 25942  | SIN3A    |
| Synapse_PPI_Communities | Syn-3_0_2312 | 6843   | VAMP1    |
| Synapse_PPI_Communities | Syn-3_0_2312 | 9217   | VAPB     |
| Synapse_PPI_Communities | Syn-3_0_2312 | 5204   | PFDN5    |
| Synapse_PPI_Communities | Syn-3_0_2312 | 4026   | LPP      |
| Synapse_PPI_Communities | Syn-3_0_2312 | 2033   | EP300    |
| Synapse_PPI_Communities | Syn-3_0_2312 | 8945   | BTRC     |
| Synapse_PPI_Communities | Syn-3_0_2312 | 1917   | EEF1A2   |
| Synapse_PPI_Communities | Syn-3_0_2312 | 9352   | TXNL1    |
| Synapse_PPI_Communities | Syn-3_0_2312 | 11124  | FAF1     |
| Synapse_PPI_Communities | Syn-3_0_2312 | 83658  | DYNLRB1  |
| Synapse_PPI_Communities | Syn-3_0_2312 | 9685   | CLINT1   |
| Synapse_PPI_Communities | Syn-3_0_2312 | 490    | ATP2B1   |
| Synapse_PPI_Communities | Syn-3_0_2312 | 9759   | HDAC4    |
| Synapse_PPI_Communities | Syn-3_0_2312 | 1019   | CDK4     |
| Synapse_PPI_Communities | Syn-3_0_2312 | 7153   | TOP2A    |
| Synapse_PPI_Communities | Syn-3_0_2312 | 7335   | UBE2V1   |
| Synapse_PPI_Communities | Syn-3_0_2312 | 6342   | SCP2     |
| Synapse_PPI_Communities | Syn-3_0_2312 | 163    | AP2B1    |
| Synapse_PPI_Communities | Syn-3_0_2312 | 29924  | EPN1     |
| Synapse_PPI_Communities | Syn-3_0_2312 | 2100   | ESR2     |
| Synapse_PPI_Communities | Syn-3_0_2312 | 4171   | MCM2     |
| Synapse_PPI_Communities | Syn-3_0_2312 | 10681  | GNB5     |
| Synapse_PPI_Communities | Syn-3_0_2312 | 6197   | RPS6KA3  |
| Synapse_PPI_Communities | Syn-3_0_2312 | 3185   | HNRNPF   |
| Synapse_PPI_Communities | Syn-3_0_2312 | 6741   | SSB      |
| Synapse_PPI_Communities | Syn-3_0_2312 | 84687  | PPP1R9B  |
| Synapse_PPI_Communities | Syn-3_0_2312 | 491    | ATP2B2   |
| Synapse_PPI_Communities | Syn-3_0_2312 | 3183   | HNRNPC   |
| Synapse_PPI_Communities | Syn-3_0_2312 | 5911   | RAP2A    |
| Synapse_PPI_Communities | Syn-3_0_2312 | 4734   | NEDD4    |
| Synapse_PPI_Communities | Syn-3_0_2312 | 9588   | PRDX6    |
| Synapse_PPI_Communities | Syn-3_0_2312 | 7064   | THOP1    |
| Synapse_PPI_Communities | Syn-3_0_2312 | 752    | FMNL1    |
| Synapse_PPI_Communities | Syn-3_0_2312 | 10813  | UTP14A   |

|                         |              |        |          |
|-------------------------|--------------|--------|----------|
| Synapse_PPI_Communities | Syn-3_0_2312 | 7881   | KCNAB1   |
| Synapse_PPI_Communities | Syn-3_0_2312 | 150    | ADRA2A   |
| Synapse_PPI_Communities | Syn-3_0_2312 | 56288  | PARD3    |
| Synapse_PPI_Communities | Syn-3_0_2312 | 4294   | MAP3K10  |
| Synapse_PPI_Communities | Syn-3_0_2312 | 5708   | PSMD2    |
| Synapse_PPI_Communities | Syn-3_0_2312 | 488    | ATP2A2   |
| Synapse_PPI_Communities | Syn-3_0_2312 | 140458 | ASB5     |
| Synapse_PPI_Communities | Syn-3_0_2312 | 6531   | SLC6A3   |
| Synapse_PPI_Communities | Syn-3_0_2312 | 9463   | PICK1    |
| Synapse_PPI_Communities | Syn-3_0_2312 | 5339   | PLEC     |
| Synapse_PPI_Communities | Syn-3_0_2312 | 3735   | KARS     |
| Synapse_PPI_Communities | Syn-3_0_2312 | 81631  | MAP1LC3B |
| Synapse_PPI_Communities | Syn-3_0_2312 | 1622   | DBI      |
| Synapse_PPI_Communities | Syn-3_0_2312 | 57794  | SUGP1    |
| Synapse_PPI_Communities | Syn-3_0_2312 | 10067  | SCAMP3   |
| Synapse_PPI_Communities | Syn-3_0_2312 | 7536   | SF1      |
| Synapse_PPI_Communities | Syn-3_0_2312 | 6749   | SSRP1    |
| Synapse_PPI_Communities | Syn-3_0_2312 | 637    | BID      |
| Synapse_PPI_Communities | Syn-3_0_2312 | 6009   | RHEB     |
| Synapse_PPI_Communities | Syn-3_0_2312 | 3838   | KPNA2    |
| Synapse_PPI_Communities | Syn-3_0_2312 | 10273  | STUB1    |
| Synapse_PPI_Communities | Syn-3_0_2312 | 22933  | SIRT2    |
| Synapse_PPI_Communities | Syn-3_0_2312 | 9475   | ROCK2    |
| Synapse_PPI_Communities | Syn-3_0_2312 | 10921  | RNPS1    |
| Synapse_PPI_Communities | Syn-3_0_2312 | 23170  | TTLL12   |
| Synapse_PPI_Communities | Syn-3_0_2312 | 213    | ALB      |
| Synapse_PPI_Communities | Syn-3_0_2312 | 9149   | DYRK1B   |
| Synapse_PPI_Communities | Syn-3_0_2312 | 23408  | SIRT5    |
| Synapse_PPI_Communities | Syn-3_0_2312 | 116540 | MRPL53   |
| Synapse_PPI_Communities | Syn-3_0_2312 | 5528   | PPP2R5D  |
| Synapse_PPI_Communities | Syn-3_0_2312 | 10250  | SRRM1    |
| Synapse_PPI_Communities | Syn-3_0_2312 | 3858   | KRT10    |
| Synapse_PPI_Communities | Syn-3_0_2312 | 2043   | EPHA4    |
| Synapse_PPI_Communities | Syn-3_0_2312 | 4915   | NTRK2    |
| Synapse_PPI_Communities | Syn-3_0_2312 | 3857   | KRT9     |
| Synapse_PPI_Communities | Syn-3_0_2312 | 4296   | MAP3K11  |
| Synapse_PPI_Communities | Syn-3_0_2312 | 84552  | PARD6G   |
| Synapse_PPI_Communities | Syn-3_0_2312 | 2011   | MARK2    |
| Synapse_PPI_Communities | Syn-3_0_2312 | 673    | BRAF     |
| Synapse_PPI_Communities | Syn-3_0_2312 | 1969   | EPHA2    |
| Synapse_PPI_Communities | Syn-3_0_2312 | 2495   | FTH1     |
| Synapse_PPI_Communities | Syn-3_0_2312 | 2029   | ENSA     |
| Synapse_PPI_Communities | Syn-3_0_2312 | 25913  | POT1     |
| Synapse_PPI_Communities | Syn-3_0_2312 | 65057  | ACD      |
| Synapse_PPI_Communities | Syn-3_0_2312 | 11214  | AKAP13   |
| Synapse_PPI_Communities | Syn-3_0_2312 | 5575   | PRKAR1B  |
| Synapse_PPI_Communities | Syn-3_0_2312 | 84817  | TXNDC17  |
| Synapse_PPI_Communities | Syn-3_0_2312 | 7171   | TPM4     |
| Synapse_PPI_Communities | Syn-3_0_2312 | 8936   | WASF1    |
| Synapse_PPI_Communities | Syn-3_0_2312 | 7791   | ZYX      |
| Synapse_PPI_Communities | Syn-3_0_2312 | 6462   | SHBG     |
| Synapse_PPI_Communities | Syn-3_0_2312 | 3741   | KCNA5    |
| Synapse_PPI_Communities | Syn-3_0_2312 | 8663   | EIF3C    |
| Synapse_PPI_Communities | Syn-3_0_2312 | 22941  | SHANK2   |
| Synapse_PPI_Communities | Syn-3_0_2312 | 22839  | DLGAP4   |
| Synapse_PPI_Communities | Syn-3_0_2312 | 6427   | SRSF2    |
| Synapse_PPI_Communities | Syn-3_0_2312 | 154796 | AMOT     |
| Synapse_PPI_Communities | Syn-3_0_2312 | 8411   | EEA1     |

|                         |              |       |         |
|-------------------------|--------------|-------|---------|
| Synapse_PPI_Communities | Syn-3_0_2312 | 5337  | PLD1    |
| Synapse_PPI_Communities | Syn-3_0_2312 | 51517 | NCKIPSD |
| Synapse_PPI_Communities | Syn-3_0_2312 | 8667  | EIF3H   |
| Synapse_PPI_Communities | Syn-3_0_2312 | 51765 | MST4    |
| Synapse_PPI_Communities | Syn-3_0_2312 | 1022  | CDK7    |
| Synapse_PPI_Communities | Syn-3_0_2312 | 156   | ADRBK1  |
| Synapse_PPI_Communities | Syn-3_0_2312 | 5903  | RANBP2  |
| Synapse_PPI_Communities | Syn-3_0_2312 | 1856  | DVL2    |
| Synapse_PPI_Communities | Syn-3_0_2312 | 58512 | DLGAP3  |
| Synapse_PPI_Communities | Syn-3_0_2312 | 1729  | DIAPH1  |
| Synapse_PPI_Communities | Syn-3_0_2312 | 164   | AP1G1   |
| Synapse_PPI_Communities | Syn-3_0_2312 | 1153  | CIRBP   |
| Synapse_PPI_Communities | Syn-3_0_2312 | 11091 | WDR5    |
| Synapse_PPI_Communities | Syn-3_0_2312 | 11321 | GPN1    |
| Synapse_PPI_Communities | Syn-3_0_2312 | 5906  | RAP1A   |
| Synapse_PPI_Communities | Syn-3_0_2312 | 4684  | NCAM1   |
| Synapse_PPI_Communities | Syn-3_0_2312 | 83737 | ITCH    |
| Synapse_PPI_Communities | Syn-3_0_2312 | 8470  | SORBS2  |
| Synapse_PPI_Communities | Syn-3_0_2312 | 29979 | UBQLN1  |
| Synapse_PPI_Communities | Syn-3_0_2312 | 5217  | PFN2    |
| Synapse_PPI_Communities | Syn-3_0_2312 | 2521  | FUS     |
| Synapse_PPI_Communities | Syn-3_0_2312 | 57062 | DDX24   |
| Synapse_PPI_Communities | Syn-3_0_2312 | 25939 | SAMHD1  |
| Synapse_PPI_Communities | Syn-3_0_2312 | 2241  | FER     |
| Synapse_PPI_Communities | Syn-3_0_2312 | 10772 | SRSF10  |
| Synapse_PPI_Communities | Syn-3_0_2312 | 7251  | TSG101  |
| Synapse_PPI_Communities | Syn-3_0_2312 | 6198  | RPS6KB1 |
| Synapse_PPI_Communities | Syn-3_0_2312 | 2617  | GARS    |
| Synapse_PPI_Communities | Syn-3_0_2312 | 8882  | ZNF259  |
| Synapse_PPI_Communities | Syn-3_0_2312 | 367   | AR      |
| Synapse_PPI_Communities | Syn-3_0_2312 | 60412 | EXOC4   |
| Synapse_PPI_Communities | Syn-3_0_2312 | 6169  | RPL38   |
| Synapse_PPI_Communities | Syn-3_0_2312 | 23451 | SF3B1   |
| Synapse_PPI_Communities | Syn-3_0_2312 | 7074  | TIAM1   |
| Synapse_PPI_Communities | Syn-3_0_2312 | 10048 | RANBP9  |
| Synapse_PPI_Communities | Syn-3_0_2312 | 6611  | SMS     |
| Synapse_PPI_Communities | Syn-3_0_2312 | 5757  | PTMA    |
| Synapse_PPI_Communities | Syn-3_0_2312 | 6625  | SNRNP70 |
| Synapse_PPI_Communities | Syn-3_0_2312 | 4172  | MCM3    |
| Synapse_PPI_Communities | Syn-3_0_2312 | 2534  | FYN     |
| Synapse_PPI_Communities | Syn-3_0_2312 | 9732  | DOCK4   |
| Synapse_PPI_Communities | Syn-3_0_2312 | 29888 | STRN4   |
| Synapse_PPI_Communities | Syn-3_0_2312 | 1933  | EEF1B2  |
| Synapse_PPI_Communities | Syn-3_0_2312 | 2810  | SFN     |
| Synapse_PPI_Communities | Syn-3_0_2312 | 26994 | RNF11   |
| Synapse_PPI_Communities | Syn-3_0_2312 | 10580 | SORBS1  |
| Synapse_PPI_Communities | Syn-3_0_2312 | 60626 | RIC8A   |
| Synapse_PPI_Communities | Syn-3_0_2312 | 56904 | SH3GLB2 |
| Synapse_PPI_Communities | Syn-3_0_2312 | 79876 | UBA5    |
| Synapse_PPI_Communities | Syn-3_0_2312 | 27342 | RABGEF1 |
| Synapse_PPI_Communities | Syn-3_0_2312 | 10534 | SSSCA1  |
| Synapse_PPI_Communities | Syn-3_0_2312 | 50618 | ITSN2   |
| Synapse_PPI_Communities | Syn-3_0_2312 | 6181  | RPLP2   |
| Synapse_PPI_Communities | Syn-3_0_2312 | 2058  | EPRS    |
| Synapse_PPI_Communities | Syn-3_0_2312 | 10006 | ABI1    |
| Synapse_PPI_Communities | Syn-3_0_2312 | 8522  | GAS7    |
| Synapse_PPI_Communities | Syn-3_0_2312 | 8502  | PKP4    |
| Synapse_PPI_Communities | Syn-3_0_2312 | 1003  | CDH5    |



|                         |              |        |          |
|-------------------------|--------------|--------|----------|
| Synapse_PPI_Communities | Syn-3_0_2312 | 1832   | DSP      |
| Synapse_PPI_Communities | Syn-3_0_2312 | 6418   | SET      |
| Synapse_PPI_Communities | Syn-3_0_2312 | 24137  | KIF4A    |
| Synapse_PPI_Communities | Syn-3_0_2312 | 10657  | KHDRBS1  |
| Synapse_PPI_Communities | Syn-3_0_2312 | 1104   | RCC1     |
| Synapse_PPI_Communities | Syn-3_0_2312 | 3480   | IGF1R    |
| Synapse_PPI_Communities | Syn-3_0_2312 | 64210  | MMS19    |
| Synapse_PPI_Communities | Syn-3_0_2312 | 3006   | HIST1H1C |
| Synapse_PPI_Communities | Syn-3_0_2312 | 9641   | IKBKE    |
| Synapse_PPI_Communities | Syn-3_0_2312 | 5129   | CDK18    |
| Synapse_PPI_Communities | Syn-3_0_2312 | 9252   | RPS6KA5  |
| Synapse_PPI_Communities | Syn-3_0_2312 | 1859   | DYRK1A   |
| Synapse_PPI_Communities | Syn-3_0_2312 | 8290   | HIST3H3  |
| Synapse_PPI_Communities | Syn-3_0_2312 | 6647   | SOD1     |
| Synapse_PPI_Communities | Syn-3_0_2312 | 6745   | SSR1     |
| Synapse_PPI_Communities | Syn-3_0_2312 | 10933  | MORF4L1  |
| Synapse_PPI_Communities | Syn-3_0_2312 | 124512 | METTL23  |
| Synapse_PPI_Communities | Syn-3_0_2312 | 55763  | EXOC1    |
| Synapse_PPI_Communities | Syn-3_0_2312 | 27185  | DISC1    |
| Synapse_PPI_Communities | Syn-3_0_2312 | 23028  | KDM1A    |
| Synapse_PPI_Communities | Syn-3_0_2312 | 1465   | CSRP1    |
| Synapse_PPI_Communities | Syn-3_0_2312 | 55114  | ARHGAP17 |
| Synapse_PPI_Communities | Syn-3_0_2312 | 4287   | ATXN3    |
| Synapse_PPI_Communities | Syn-3_0_2312 | 23154  | NCDN     |
| Synapse_PPI_Communities | Syn-3_0_2312 | 11140  | CDC37    |
| Synapse_PPI_Communities | Syn-3_0_2312 | 5460   | POU5F1   |
| Synapse_PPI_Communities | Syn-3_0_2312 | 6772   | STAT1    |
| Synapse_PPI_Communities | Syn-3_0_2312 | 7514   | XPO1     |
| Synapse_PPI_Communities | Syn-3_0_2312 | 9632   | SEC24C   |
| Synapse_PPI_Communities | Syn-3_0_2312 | 322    | APBB1    |
| Synapse_PPI_Communities | Syn-3_0_2312 | 5928   | RBBP4    |
| Synapse_PPI_Communities | Syn-3_0_2312 | 56893  | UBQLN4   |
| Synapse_PPI_Communities | Syn-3_0_2312 | 8665   | EIF3F    |
| Synapse_PPI_Communities | Syn-3_0_2312 | 7265   | TTC1     |
| Synapse_PPI_Communities | Syn-3_0_2312 | 5997   | RGS2     |
| Synapse_PPI_Communities | Syn-3_0_2312 | 23512  | SUZ12    |
| Synapse_PPI_Communities | Syn-3_0_2312 | 191    | AHCY     |
| Synapse_PPI_Communities | Syn-3_0_2312 | 5970   | RELA     |
| Synapse_PPI_Communities | Syn-3_0_2312 | 6236   | RRAD     |
| Synapse_PPI_Communities | Syn-3_0_2312 | 3856   | KRT8     |
| Synapse_PPI_Communities | Syn-3_0_2312 | 5213   | PFKM     |
| Synapse_PPI_Communities | Syn-3_0_2312 | 5093   | PCBP1    |
| Synapse_PPI_Communities | Syn-3_0_2312 | 29993  | PACIN1   |
| Synapse_PPI_Communities | Syn-3_0_2312 | 57787  | MARK4    |
| Synapse_PPI_Communities | Syn-3_0_2312 | 5037   | PEBP1    |
| Synapse_PPI_Communities | Syn-3_0_2312 | 56647  | BCCIP    |
| Synapse_PPI_Communities | Syn-3_0_2312 | 3066   | HDAC2    |
| Synapse_PPI_Communities | Syn-3_0_2312 | 4763   | NF1      |
| Synapse_PPI_Communities | Syn-3_0_2312 | 7417   | VDAC2    |
| Synapse_PPI_Communities | Syn-3_0_2312 | 25813  | SAMM50   |
| Synapse_PPI_Communities | Syn-3_0_2312 | 993    | CDC25A   |
| Synapse_PPI_Communities | Syn-3_0_2312 | 57118  | CAMK1D   |
| Synapse_PPI_Communities | Syn-3_0_2312 | 331    | XIAP     |
| Synapse_PPI_Communities | Syn-3_0_2312 | 4089   | SMAD4    |
| Synapse_PPI_Communities | Syn-3_0_2312 | 291    | SLC25A4  |
| Synapse_PPI_Communities | Syn-3_0_2312 | 5295   | PIK3R1   |
| Synapse_PPI_Communities | Syn-3_0_2312 | 5499   | PPP1CA   |
| Synapse_PPI_Communities | Syn-3_0_2312 | 57379  | AICDA    |

|                         |              |        |           |
|-------------------------|--------------|--------|-----------|
| Synapse_PPI_Communities | Syn-3_0_2312 | 5300   | PIN1      |
| Synapse_PPI_Communities | Syn-3_0_2312 | 11161  | C14orf1   |
| Synapse_PPI_Communities | Syn-3_0_2312 | 4163   | MCC       |
| Synapse_PPI_Communities | Syn-3_0_2312 | 267    | AMFR      |
| Synapse_PPI_Communities | Syn-3_0_2312 | 23085  | ERC1      |
| Synapse_PPI_Communities | Syn-3_0_2312 | 11100  | HNRNPUL1  |
| Synapse_PPI_Communities | Syn-3_0_2312 | 23111  | SPG20     |
| Synapse_PPI_Communities | Syn-3_0_2312 | 9656   | MDC1      |
| Synapse_PPI_Communities | Syn-3_0_2312 | 6517   | SLC2A4    |
| Synapse_PPI_Communities | Syn-3_0_2312 | 10484  | SEC23A    |
| Synapse_PPI_Communities | Syn-3_0_2312 | 9114   | ATP6V0D1  |
| Synapse_PPI_Communities | Syn-3_0_2312 | 6259   | RYK       |
| Synapse_PPI_Communities | Syn-3_0_2312 | 4653   | MYOC      |
| Synapse_PPI_Communities | Syn-3_0_2312 | 3636   | INPPL1    |
| Synapse_PPI_Communities | Syn-3_0_2312 | 6774   | STAT3     |
| Synapse_PPI_Communities | Syn-3_0_2312 | 127247 | ASB17     |
| Synapse_PPI_Communities | Syn-3_0_2312 | 10409  | BASP1     |
| Synapse_PPI_Communities | Syn-3_0_2312 | 6310   | ATXN1     |
| Synapse_PPI_Communities | Syn-3_0_2312 | 3688   | ITGB1     |
| Synapse_PPI_Communities | Syn-3_0_2312 | 7082   | TJP1      |
| Synapse_PPI_Communities | Syn-3_0_2312 | 7525   | YES1      |
| Synapse_PPI_Communities | Syn-3_0_2312 | 5905   | RANGAP1   |
| Synapse_PPI_Communities | Syn-3_0_2312 | 8649   | LAMTOR3   |
| Synapse_PPI_Communities | Syn-3_0_2312 | 2547   | XRCC6     |
| Synapse_PPI_Communities | Syn-3_0_2312 | 23392  | KIAA0368  |
| Synapse_PPI_Communities | Syn-3_0_2312 | 7083   | TK1       |
| Synapse_PPI_Communities | Syn-3_0_2312 | 6606   | SMN1      |
| Synapse_PPI_Communities | Syn-3_0_2312 | 1601   | DAB2      |
| Synapse_PPI_Communities | Syn-3_0_2312 | 23122  | CLASP2    |
| Synapse_PPI_Communities | Syn-3_0_2312 | 5859   | QARS      |
| Synapse_PPI_Communities | Syn-3_0_2312 | 2078   | ERG       |
| Synapse_PPI_Communities | Syn-3_0_2312 | 648    | BMI1      |
| Synapse_PPI_Communities | Syn-3_0_2312 | 55738  | ARFGAP1   |
| Synapse_PPI_Communities | Syn-3_0_2312 | 4292   | MLH1      |
| Synapse_PPI_Communities | Syn-3_0_2312 | 2146   | EZH2      |
| Synapse_PPI_Communities | Syn-3_0_2312 | 10454  | TAB1      |
| Synapse_PPI_Communities | Syn-3_0_2312 | 5599   | MAPK8     |
| Synapse_PPI_Communities | Syn-3_0_2312 | 22976  | PAXIP1    |
| Synapse_PPI_Communities | Syn-3_0_2312 | 5597   | MAPK6     |
| Synapse_PPI_Communities | Syn-3_0_2312 | 7321   | UBE2D1    |
| Synapse_PPI_Communities | Syn-3_0_2312 | 6624   | FSCN1     |
| Synapse_PPI_Communities | Syn-3_0_2312 | 6696   | SPP1      |
| Synapse_PPI_Communities | Syn-3_0_2312 | 10524  | KAT5      |
| Synapse_PPI_Communities | Syn-3_0_2312 | 10856  | RUVBL2    |
| Synapse_PPI_Communities | Syn-3_0_2312 | 5105   | PCK1      |
| Synapse_PPI_Communities | Syn-3_0_2312 | 140462 | ASB9      |
| Synapse_PPI_Communities | Syn-3_0_2312 | 7520   | XRCC5     |
| Synapse_PPI_Communities | Syn-3_0_2312 | 10492  | SYNCRIP   |
| Synapse_PPI_Communities | Syn-3_0_2312 | 1654   | DDX3X     |
| Synapse_PPI_Communities | Syn-3_0_2312 | 1107   | CHD3      |
| Synapse_PPI_Communities | Syn-3_0_2312 | 1936   | EEF1D     |
| Synapse_PPI_Communities | Syn-3_0_2312 | 773    | CACNA1A   |
| Synapse_PPI_Communities | Syn-3_0_2312 | 6929   | TCF3      |
| Synapse_PPI_Communities | Syn-3_0_2312 | 1080   | CFTR      |
| Synapse_PPI_Communities | Syn-3_0_2312 | 10013  | HDAC6     |
| Synapse_PPI_Communities | Syn-3_0_2312 | 7189   | TRAF6     |
| Synapse_PPI_Communities | Syn-3_0_2312 | 4087   | SMAD2     |
| Synapse_PPI_Communities | Syn-3_0_2312 | 3181   | HNRNPA2B1 |

|                         |              |        |          |
|-------------------------|--------------|--------|----------|
| Synapse_PPI_Communities | Syn-3_0_2312 | 4000   | LMNA     |
| Synapse_PPI_Communities | Syn-3_0_2312 | 6840   | SVIL     |
| Synapse_PPI_Communities | Syn-3_0_2312 | 55660  | PRPF40A  |
| Synapse_PPI_Communities | Syn-3_0_2312 | 59     | ACTA2    |
| Synapse_PPI_Communities | Syn-3_0_2312 | 3895   | KTN1     |
| Synapse_PPI_Communities | Syn-3_0_2312 | 3065   | HDAC1    |
| Synapse_PPI_Communities | Syn-3_0_2312 | 7277   | TUBA4A   |
| Synapse_PPI_Communities | Syn-3_0_2312 | 3396   | ICT1     |
| Synapse_PPI_Communities | Syn-3_0_2312 | 4282   | MIF      |
| Synapse_PPI_Communities | Syn-3_0_2312 | 79823  | CAMKMT   |
| Synapse_PPI_Communities | Syn-3_0_2312 | 805    | CALM2    |
| Synapse_PPI_Communities | Syn-3_0_2312 | 808    | CALM3    |
| Synapse_PPI_Communities | Syn-3_0_2312 | 672    | BRCA1    |
| Synapse_PPI_Communities | Syn-3_0_2312 | 8607   | RUVBL1   |
| Synapse_PPI_Communities | Syn-3_0_2312 | 3981   | LIG4     |
| Synapse_PPI_Communities | Syn-3_0_2312 | 1894   | ECT2     |
| Synapse_PPI_Communities | Syn-3_0_2312 | 6195   | RPS6KA1  |
| Synapse_PPI_Communities | Syn-3_0_2312 | 4478   | MSN      |
| Synapse_PPI_Communities | Syn-3_0_2312 | 1201   | CLN3     |
| Synapse_PPI_Communities | Syn-3_0_2312 | 3295   | HSD17B4  |
| Synapse_PPI_Communities | Syn-3_0_2312 | 6657   | SOX2     |
| Synapse_PPI_Communities | Syn-3_0_2312 | 5878   | RAB5C    |
| Synapse_PPI_Communities | Syn-3_0_2312 | 2950   | GSTP1    |
| Synapse_PPI_Communities | Syn-3_0_2312 | 57520  | HECW2    |
| Synapse_PPI_Communities | Syn-3_0_2312 | 4255   | MGMT     |
| Synapse_PPI_Communities | Syn-3_0_2312 | 324    | APC      |
| Synapse_PPI_Communities | Syn-3_0_2312 | 378    | ARF4     |
| Synapse_PPI_Communities | Syn-3_0_2312 | 476    | ATP1A1   |
| Synapse_PPI_Communities | Syn-3_0_2312 | 26277  | TINF2    |
| Synapse_PPI_Communities | Syn-3_0_2312 | 7014   | TERF2    |
| Synapse_PPI_Communities | Syn-3_0_2312 | 308    | ANXA5    |
| SZ_Risk                 | PGC2         | 1806   | DPYD     |
| SZ_Risk                 | PGC2         | 406928 | MIR137   |
| SZ_Risk                 | PGC2         | 403    | ARL3     |
| SZ_Risk                 | PGC2         | 57412  | AS3MT    |
| SZ_Risk                 | PGC2         | 119032 | C10orf32 |
| SZ_Risk                 | PGC2         | 54805  | CNNM2    |
| SZ_Risk                 | PGC2         | 1586   | CYP17A1  |
| SZ_Risk                 | PGC2         | 9118   | INA      |
| SZ_Risk                 | PGC2         | 22978  | NT5C2    |
| SZ_Risk                 | PGC2         | 84108  | PCGF6    |
| SZ_Risk                 | PGC2         | 22984  | PDCD11   |
| SZ_Risk                 | PGC2         | 118980 | SFXN2    |
| SZ_Risk                 | PGC2         | 6877   | TAF5     |
| SZ_Risk                 | PGC2         | 81603  | TRIM8    |
| SZ_Risk                 | PGC2         | 84833  | USMG5    |
| SZ_Risk                 | PGC2         | 54838  | WBP1L    |
| SZ_Risk                 | PGC2         | 775    | CACNA1C  |
| SZ_Risk                 | PGC2         | 203062 | TSNARE1  |
| SZ_Risk                 | PGC2         | 64116  | SLC39A8  |
| SZ_Risk                 | PGC2         | 8379   | MAD1L1   |
| SZ_Risk                 | PGC2         | 57688  | ZSWIM6   |
| SZ_Risk                 | PGC2         | 23457  | ABCB9    |
| SZ_Risk                 | PGC2         | 51329  | ARL6IP4  |
| SZ_Risk                 | PGC2         | 91574  | C12orf65 |
| SZ_Risk                 | PGC2         | 8099   | CDK2AP1  |
| SZ_Risk                 | PGC2         | 10198  | MPHOSPH9 |
| SZ_Risk                 | PGC2         | 79676  | OGFOD2   |

|         |      |        |          |
|---------|------|--------|----------|
| SZ_Risk | PGC2 | 57605  | PITPNM2  |
| SZ_Risk | PGC2 | 196383 | RILPL2   |
| SZ_Risk | PGC2 | 55206  | SBNO1    |
| SZ_Risk | PGC2 | 387893 | SETD8    |
| SZ_Risk | PGC2 | 79568  | C2orf47  |
| SZ_Risk | PGC2 | 205327 | C2orf69  |
| SZ_Risk | PGC2 | 129450 | TYW5     |
| SZ_Risk | PGC2 | 2242   | FES      |
| SZ_Risk | PGC2 | 5045   | FURIN    |
| SZ_Risk | PGC2 | 4122   | MAN2A2   |
| SZ_Risk | PGC2 | 9881   | TRANK1   |
| SZ_Risk | PGC2 | 84334  | APOPT1   |
| SZ_Risk | PGC2 | 9529   | BAG5     |
| SZ_Risk | PGC2 | 1152   | CKB      |
| SZ_Risk | PGC2 | 3831   | KLC1     |
| SZ_Risk | PGC2 | 23368  | PPP1R13B |
| SZ_Risk | PGC2 | 115708 | TRMT61A  |
| SZ_Risk | PGC2 | 7517   | XRCC3    |
| SZ_Risk | PGC2 | 79038  | ZFYVE21  |
| SZ_Risk | PGC2 | 1136   | CHRNA3   |
| SZ_Risk | PGC2 | 1138   | CHRNA5   |
| SZ_Risk | PGC2 | 1143   | CHRNA4   |
| SZ_Risk | PGC2 | 3658   | IREB2    |
| SZ_Risk | PGC2 | 5685   | PSMA4    |
| SZ_Risk | PGC2 | 83943  | IMMP2L   |
| SZ_Risk | PGC2 | 399979 | SNX19    |
| SZ_Risk | PGC2 | 91752  | ZNF804A  |
| SZ_Risk | PGC2 | 22866  | CNKSR2   |
| SZ_Risk | PGC2 | 783    | CACNB2   |
| SZ_Risk | PGC2 | 4035   | LRP1     |
| SZ_Risk | PGC2 | 4640   | MYO1A    |
| SZ_Risk | PGC2 | 4665   | NAB2     |
| SZ_Risk | PGC2 | 56901  | NDUFA4L2 |
| SZ_Risk | PGC2 | 11247  | NXP4     |
| SZ_Risk | PGC2 | 22864  | R3HDM2   |
| SZ_Risk | PGC2 | 6472   | SHMT2    |
| SZ_Risk | PGC2 | 246329 | STAC3    |
| SZ_Risk | PGC2 | 6778   | STAT6    |
| SZ_Risk | PGC2 | 6866   | TAC3     |
| SZ_Risk | PGC2 | 23306  | TMEM194A |
| SZ_Risk | PGC2 | 127255 | LRRIQ3   |
| SZ_Risk | PGC2 | 389084 | C2orf82  |
| SZ_Risk | PGC2 | 80303  | EFHD1    |
| SZ_Risk | PGC2 | 26058  | GIGYF2   |
| SZ_Risk | PGC2 | 3769   | KCNJ13   |
| SZ_Risk | PGC2 | 25791  | NGEF     |
| SZ_Risk | PGC2 | 90952  | ESAM     |
| SZ_Risk | PGC2 | 79684  | MSANTD2  |
| SZ_Risk | PGC2 | 4900   | NRGN     |
| SZ_Risk | PGC2 | 23584  | VSIG2    |
| SZ_Risk | PGC2 | 6925   | TCF4     |
| SZ_Risk | PGC2 | 55626  | AMBRA1   |
| SZ_Risk | PGC2 | 392    | ARHGAP1  |
| SZ_Risk | PGC2 | 9776   | ATG13    |
| SZ_Risk | PGC2 | 1132   | CHRM4    |
| SZ_Risk | PGC2 | 9793   | CKAP5    |
| SZ_Risk | PGC2 | 90993  | CREB3L1  |
| SZ_Risk | PGC2 | 8525   | DGKZ     |

|         |      |           |                |
|---------|------|-----------|----------------|
| SZ_Risk | PGC2 | 2147      | F2             |
| SZ_Risk | PGC2 | 283254    | HARBI1         |
| SZ_Risk | PGC2 | 4192      | MDK            |
| SZ_Risk | PGC2 | 79797     | ZNF408         |
| SZ_Risk | PGC2 | 339829    | CCDC39         |
| SZ_Risk | PGC2 | 131118    | DNAJC19        |
| SZ_Risk | PGC2 | 8087      | FXR1           |
| SZ_Risk | PGC2 | 79913     | ACTR5          |
| SZ_Risk | PGC2 | 26051     | PPP1R16B       |
| SZ_Risk | PGC2 | 140679    | SLC32A1        |
| SZ_Risk | PGC2 | 55120     | FANCL          |
| SZ_Risk | PGC2 | 7444      | VRK2           |
| SZ_Risk | PGC2 | 57188     | ADAMTSL3       |
| SZ_Risk | PGC2 | 643707    | GOLGA6L4       |
| SZ_Risk | PGC2 | 54993     | ZSCAN2         |
| SZ_Risk | PGC2 | 91526     | ANKRD44        |
| SZ_Risk | PGC2 | 66037     | BOLL           |
| SZ_Risk | PGC2 | 80219     | COQ10B         |
| SZ_Risk | PGC2 | 3329      | HSPD1          |
| SZ_Risk | PGC2 | 3336      | HSPE1          |
| SZ_Risk | PGC2 | 92935     | MARS2          |
| SZ_Risk | PGC2 | 5334      | PLCL1          |
| SZ_Risk | PGC2 | 130132    | RFTN2          |
| SZ_Risk | PGC2 | 23451     | SF3B1          |
| SZ_Risk | PGC2 | 150356    | CHADL          |
| SZ_Risk | PGC2 | 2033      | EP300          |
| SZ_Risk | PGC2 | 83746     | L3MBTL2        |
| SZ_Risk | PGC2 | 5905      | RANGAP1        |
| SZ_Risk | PGC2 | 27012     | KCNV1          |
| SZ_Risk | PGC2 | 152330    | CNTN4          |
| SZ_Risk | PGC2 | 1813      | DRD2           |
| SZ_Risk | PGC2 | 22997     | IGSF9B         |
| SZ_Risk | PGC2 | 55830     | GLT8D1         |
| SZ_Risk | PGC2 | 26354     | GNL3           |
| SZ_Risk | PGC2 | 3697      | ITIH1          |
| SZ_Risk | PGC2 | 3699      | ITIH3          |
| SZ_Risk | PGC2 | 3700      | ITIH4          |
| SZ_Risk | PGC2 | 389125    | MUSTN1         |
| SZ_Risk | PGC2 | 6787      | NEK4           |
| SZ_Risk | PGC2 | 11188     | NISCH          |
| SZ_Risk | PGC2 | 64943     | NT5DC2         |
| SZ_Risk | PGC2 | 55193     | PBRM1          |
| SZ_Risk | PGC2 | 440957    | SMIM4          |
| SZ_Risk | PGC2 | 28972     | SPCS1          |
| SZ_Risk | PGC2 | 23166     | STAB1          |
| SZ_Risk | PGC2 | 375346    | TMEM110        |
| SZ_Risk | PGC2 | 100526772 | TMEM110-MUSTN1 |
| SZ_Risk | PGC2 | 226       | ALDOA          |
| SZ_Risk | PGC2 | 253982    | ASPHD1         |
| SZ_Risk | PGC2 | 146378    | C16orf92       |
| SZ_Risk | PGC2 | 8448      | DOC2A          |
| SZ_Risk | PGC2 | 83723     | FAM57B         |
| SZ_Risk | PGC2 | 79153     | GDPD3          |
| SZ_Risk | PGC2 | 8479      | HIRIP3         |
| SZ_Risk | PGC2 | 283899    | INO80E         |
| SZ_Risk | PGC2 | 253980    | KCTD13         |
| SZ_Risk | PGC2 | 5595      | MAPK3          |
| SZ_Risk | PGC2 | 5531      | PPP4C          |

|         |      |        |         |
|---------|------|--------|---------|
| SZ_Risk | PGC2 | 26470  | SEZ6L2  |
| SZ_Risk | PGC2 | 9344   | TAOK2   |
| SZ_Risk | PGC2 | 6911   | TBX6    |
| SZ_Risk | PGC2 | 124446 | TMEM219 |
| SZ_Risk | PGC2 | 83719  | YPEL3   |
| SZ_Risk | PGC2 | 8911   | CACNA1I |
| SZ_Risk | PGC2 | 55167  | MSL2    |
| SZ_Risk | PGC2 | 4690   | NCK1    |
| SZ_Risk | PGC2 | 5096   | PCCB    |
| SZ_Risk | PGC2 | 5523   | PPP2R3A |
| SZ_Risk | PGC2 | 80723  | SLC35G2 |
| SZ_Risk | PGC2 | 10274  | STAG1   |
| SZ_Risk | PGC2 | 2890   | GRIA1   |
| SZ_Risk | PGC2 | 64219  | PJA1    |
| SZ_Risk | PGC2 | 9905   | SGSM2   |
| SZ_Risk | PGC2 | 23293  | SMG6    |
| SZ_Risk | PGC2 | 63826  | SRR     |
| SZ_Risk | PGC2 | 55720  | TSR1    |
| SZ_Risk | PGC2 | 2913   | GRM3    |
| SZ_Risk | PGC2 | 9682   | KDM4A   |
| SZ_Risk | PGC2 | 5792   | PTPRF   |
| SZ_Risk | PGC2 | 148113 | CILP2   |
| SZ_Risk | PGC2 | 54815  | GATAD2A |
| SZ_Risk | PGC2 | 404037 | HAPLN4  |
| SZ_Risk | PGC2 | 23383  | MAU2    |
| SZ_Risk | PGC2 | 1463   | NCAN    |
| SZ_Risk | PGC2 | 51079  | NDUFA13 |
| SZ_Risk | PGC2 | 80714  | PBX4    |
| SZ_Risk | PGC2 | 57794  | SUGP1   |
| SZ_Risk | PGC2 | 53345  | TM6SF2  |
| SZ_Risk | PGC2 | 83983  | TSSK6   |
| SZ_Risk | PGC2 | 81611  | ANP32E  |
| SZ_Risk | PGC2 | 51107  | APH1A   |
| SZ_Risk | PGC2 | 148523 | C1orf51 |
| SZ_Risk | PGC2 | 79630  | C1orf54 |
| SZ_Risk | PGC2 | 23632  | CA14    |
| SZ_Risk | PGC2 | 56957  | OTUD7B  |
| SZ_Risk | PGC2 | 51177  | PLEKHO1 |
| SZ_Risk | PGC2 | 11311  | VPS45   |
| SZ_Risk | PGC2 | 9892   | SNAP91  |
| SZ_Risk | PGC2 | 9651   | PLCH2   |
| SZ_Risk | PGC2 | 2072   | ERCC4   |
| SZ_Risk | PGC2 | 54517  | PUS7    |
| SZ_Risk | PGC2 | 6733   | SRPK2   |
| SZ_Risk | PGC2 | 473    | RERE    |
| SZ_Risk | PGC2 | 50651  | SLC45A1 |
| SZ_Risk | PGC2 | 488    | ATP2A2  |
| SZ_Risk | PGC2 | 54969  | C4orf27 |
| SZ_Risk | PGC2 | 1182   | CLCN3   |
| SZ_Risk | PGC2 | 4750   | NEK1    |
| SZ_Risk | PGC2 | 10690  | FUT9    |
| SZ_Risk | PGC2 | 79019  | CENPM   |
| SZ_Risk | PGC2 | 1565   | CYP2D6  |
| SZ_Risk | PGC2 | 150368 | FAM109B |
| SZ_Risk | PGC2 | 4668   | NAGA    |
| SZ_Risk | PGC2 | 4700   | NDUFA6  |
| SZ_Risk | PGC2 | 55964  | SEPT3   |
| SZ_Risk | PGC2 | 440829 | SHISA8  |

|         |      |           |           |
|---------|------|-----------|-----------|
| SZ_Risk | PGC2 | 91689     | SMGT1     |
| SZ_Risk | PGC2 | 6721      | SREBF2    |
| SZ_Risk | PGC2 | 6942      | TCF20     |
| SZ_Risk | PGC2 | 115650    | TNFRSF13C |
| SZ_Risk | PGC2 | 164684    | WBP2NL    |
| SZ_Risk | PGC2 | 643376    | BTBD18    |
| SZ_Risk | PGC2 | 280636    | C11orf31  |
| SZ_Risk | PGC2 | 10978     | CLP1      |
| SZ_Risk | PGC2 | 1500      | CTNND1    |
| SZ_Risk | PGC2 | 219541    | MED19     |
| SZ_Risk | PGC2 | 710       | SERPING1  |
| SZ_Risk | PGC2 | 51075     | TMX2      |
| SZ_Risk | PGC2 | 219539    | YPEL4     |
| SZ_Risk | PGC2 | 25921     | ZDHC5     |
| SZ_Risk | PGC2 | 338645    | LUZP2     |
| SZ_Risk | PGC2 | 9162      | DGKI      |
| SZ_Risk | PGC2 | 5764      | PTN       |
| SZ_Risk | PGC2 | 7088      | TLE1      |
| SZ_Risk | PGC2 | 10000     | AKT3      |
| SZ_Risk | PGC2 | 10806     | SDCCAG8   |
| SZ_Risk | PGC2 | 100131244 | ANKRD63   |
| SZ_Risk | PGC2 | 56924     | PAK6      |
| SZ_Risk | PGC2 | 5330      | PLCB2     |
| SZ_Risk | PGC2 | 9745      | ZNF536    |
| SZ_Risk | PGC2 | 4208      | MEF2C     |
| SZ_Risk | PGC2 | 9779      | TBC1D5    |
| SZ_Risk | PGC2 | 995       | CDC25C    |
| SZ_Risk | PGC2 | 1495      | CTNNA1    |
| SZ_Risk | PGC2 | 1958      | EGR1      |
| SZ_Risk | PGC2 | 2107      | ETF1      |
| SZ_Risk | PGC2 | 51307     | FAM53C    |
| SZ_Risk | PGC2 | 2676      | GFRA3     |
| SZ_Risk | PGC2 | 3313      | HSPA9     |
| SZ_Risk | PGC2 | 51780     | KDM3B     |
| SZ_Risk | PGC2 | 51308     | REEP2     |
| SZ_Risk | PGC2 | 64919     | BCL11B    |
| SZ_Risk | PGC2 | 9628      | RGS6      |
| SZ_Risk | PGC2 | 348980    | HCN1      |
| SZ_Risk | PGC2 | 767       | CA8       |
| SZ_Risk | PGC2 | 56603     | CYP26B1   |
| SZ_Risk | PGC2 | 57476     | GRAMD1B   |
| SZ_Risk | PGC2 | 23314     | SATB2     |
| SZ_Risk | PGC2 | 64002     | PCGEM1    |
| SZ_Risk | PGC2 | 2823      | GPM6A     |
| SZ_Risk | PGC2 | 64478     | CSMD1     |
| SZ_Risk | PGC2 | 8452      | CUL3      |
| SZ_Risk | PGC2 | 4325      | MMP16     |
| SZ_Risk | PGC2 | 2903      | GRIN2A    |
| SZ_Risk | PGC2 | 5587      | PRKD1     |
| SZ_Risk | PGC2 | 6314      | ATXN7     |
| SZ_Risk | PGC2 | 132200    | C3orf49   |
| SZ_Risk | PGC2 | 9861      | PSMD6     |
| SZ_Risk | PGC2 | 80145     | THOC7     |
| SZ_Risk | PGC2 | 65057     | ACD       |
| SZ_Risk | PGC2 | 388284    | C16orf86  |
| SZ_Risk | PGC2 | 80152     | CENPT     |
| SZ_Risk | PGC2 | 1506      | CTRL      |
| SZ_Risk | PGC2 | 55794     | DDX28     |

|         |      |           |           |
|---------|------|-----------|-----------|
| SZ_Risk | PGC2 | 64174     | DPEP2     |
| SZ_Risk | PGC2 | 64180     | DPEP3     |
| SZ_Risk | PGC2 | 23644     | EDC4      |
| SZ_Risk | PGC2 | 84080     | ENKD1     |
| SZ_Risk | PGC2 | 80004     | ESRP2     |
| SZ_Risk | PGC2 | 81577     | GFOD2     |
| SZ_Risk | PGC2 | 3931      | LCAT      |
| SZ_Risk | PGC2 | 4775      | NFATC3    |
| SZ_Risk | PGC2 | 123904    | NRN1L     |
| SZ_Risk | PGC2 | 10204     | NUTF2     |
| SZ_Risk | PGC2 | 50855     | PARD6A    |
| SZ_Risk | PGC2 | 23659     | PLA2G15   |
| SZ_Risk | PGC2 | 5681      | PSKH1     |
| SZ_Risk | PGC2 | 5699      | PSMB10    |
| SZ_Risk | PGC2 | 57610     | RANBP10   |
| SZ_Risk | PGC2 | 6560      | SLC12A4   |
| SZ_Risk | PGC2 | 9057      | SLC7A6    |
| SZ_Risk | PGC2 | 84138     | SLC7A6OS  |
| SZ_Risk | PGC2 | 57215     | THAP11    |
| SZ_Risk | PGC2 | 55815     | TSNAXIP1  |
| SZ_Risk | PGC2 | 26122     | EPC2      |
| SZ_Risk | PGC2 | 91647     | ATPAF2    |
| SZ_Risk | PGC2 | 1819      | DRG2      |
| SZ_Risk | PGC2 | 79018     | GID4      |
| SZ_Risk | PGC2 | 83450     | LRRC48    |
| SZ_Risk | PGC2 | 51168     | MYO15A    |
| SZ_Risk | PGC2 | 10743     | RAI1      |
| SZ_Risk | PGC2 | 6720      | SREBF1    |
| SZ_Risk | PGC2 | 146691    | TOM1L2    |
| SZ_Risk | PGC2 | 7090      | TLE3      |
| SZ_Risk | PGC2 | 23019     | CNOT1     |
| SZ_Risk | PGC2 | 55238     | SLC38A7   |
| SZ_Risk | PGC2 | 1191      | CLU       |
| SZ_Risk | PGC2 | 2053      | EPHX2     |
| SZ_Risk | PGC2 | 57502     | NLGN4X    |
| SZ_Risk | PGC2 | 22999     | RIMS1     |
| SZ_Risk | PGC2 | 1687      | DFNA5     |
| SZ_Risk | PGC2 | 51678     | MPP6      |
| SZ_Risk | PGC2 | 26031     | OSBPL3    |
| SZ_Risk | PGC2 | 4124      | MAN2A1    |
| SZ_Risk | PGC2 | 100616252 | MIR548AJ2 |
| SZ_Risk | PGC2 | 55568     | GALNT10   |
| SZ_Risk | PGC2 | 399947    | C11orf87  |
| SZ_Risk | PGC2 | 83857     | TMTC1     |
| SZ_Risk | PGC2 | 5420      | PODXL     |
| SZ_Risk | PGC2 | 100128537 | C1orf132  |
| SZ_Risk | PGC2 | 4179      | CD46      |
| SZ_Risk | PGC2 | 1379      | CR1L      |
| SZ_Risk | PGC2 | 3745      | KCNB1     |
| SZ_Risk | PGC2 | 5740      | PTGIS     |
| SZ_Risk | PGC2 | 256021    | C12orf79  |
| SZ_Risk | PGC2 | 1803      | DPP4      |
| SZ_Risk | PGC2 | 57282     | SLC4A10   |
| SZ_Risk | PGC2 | 51070     | NOSIP     |
| SZ_Risk | PGC2 | 57479     | PRR12     |
| SZ_Risk | PGC2 | 5639      | PRRG2     |
| SZ_Risk | PGC2 | 57333     | RCN3      |
| SZ_Risk | PGC2 | 6237      | RRAS      |



|         |                 |           |                |
|---------|-----------------|-----------|----------------|
| SZ_Risk | PGC2            | 58506     | SCAF1          |
| SZ_Risk | PGC2            | 374470    | C12orf42       |
| SZ_Risk | PGC2            | 929       | CD14           |
| SZ_Risk | PGC2            | 373863    | DND1           |
| SZ_Risk | PGC2            | 3035      | HARS           |
| SZ_Risk | PGC2            | 23438     | HARS2          |
| SZ_Risk | PGC2            | 3550      | IK             |
| SZ_Risk | PGC2            | 4695      | NDUFA2         |
| SZ_Risk | PGC2            | 56147     | PCDHA1         |
| SZ_Risk | PGC2            | 56139     | PCDHA10        |
| SZ_Risk | PGC2            | 56146     | PCDHA2         |
| SZ_Risk | PGC2            | 56145     | PCDHA3         |
| SZ_Risk | PGC2            | 56144     | PCDHA4         |
| SZ_Risk | PGC2            | 56143     | PCDHA5         |
| SZ_Risk | PGC2            | 56142     | PCDHA6         |
| SZ_Risk | PGC2            | 56141     | PCDHA7         |
| SZ_Risk | PGC2            | 56140     | PCDHA8         |
| SZ_Risk | PGC2            | 9752      | PCDHA9         |
| SZ_Risk | PGC2            | 55374     | TMCO6          |
| SZ_Risk | PGC2            | 54853     | WDR55          |
| SZ_Risk | PGC2            | 153527    | ZMAT2          |
| SZ_Risk | PGC2_permissive | 80317     | ZKSCAN3        |
| SZ_Risk | PGC2_permissive | 9753      | ZSCAN12        |
| SZ_Risk | PGC2_permissive | 222696    | ZSCAN23        |
| SZ_Risk | PGC2_permissive | 2880      | GPX5           |
| SZ_Risk | PGC2_permissive | 114821    | SCAND3         |
| SZ_Risk | PGC2_permissive | 54838     | WBP1L          |
| SZ_Risk | PGC2_permissive | 1586      | CYP17A1        |
| SZ_Risk | PGC2_permissive | 119032    | C10orf32       |
| SZ_Risk | PGC2_permissive | 100528007 | C10orf32-AS3MT |
| SZ_Risk | PGC2_permissive | 57412     | AS3MT          |
| SZ_Risk | PGC2_permissive | 54805     | CNNM2          |
| SZ_Risk | PGC2_permissive | 22978     | NT5C2          |
| SZ_Risk | PGC2_permissive | 775       | CACNA1C        |
| SZ_Risk | PGC2_permissive | 100874234 | CACNA1C-AS4    |
| SZ_Risk | PGC2_permissive | 100874370 | CACNA1C-IT3    |
| SZ_Risk | PGC2_permissive | 1806      | DPYD           |
| SZ_Risk | PGC2_permissive | 400765    | MIR137HG       |
| SZ_Risk | PGC2_permissive | 100616452 | MIR2682        |
| SZ_Risk | PGC2_permissive | 406928    | MIR137         |
| SZ_Risk | PGC2_permissive | 205327    | C2orf69        |
| SZ_Risk | PGC2_permissive | 129450    | TYW5           |
| SZ_Risk | PGC2_permissive | 79568     | C2orf47        |
| SZ_Risk | PGC2_permissive | 23457     | ABC9           |
| SZ_Risk | PGC2_permissive | 79676     | OGFOD2         |
| SZ_Risk | PGC2_permissive | 51329     | ARL6IP4        |
| SZ_Risk | PGC2_permissive | 57605     | PITPNM2        |
| SZ_Risk | PGC2_permissive | 100422931 | MIR4304        |
| SZ_Risk | PGC2_permissive | 100507091 | LOC100507091   |
| SZ_Risk | PGC2_permissive | 10198     | MPHOSPH9       |
| SZ_Risk | PGC2_permissive | 91574     | C12orf65       |
| SZ_Risk | PGC2_permissive | 8099      | CDK2AP1        |
| SZ_Risk | PGC2_permissive | 55206     | SBNO1          |
| SZ_Risk | PGC2_permissive | 387893    | SETD8          |
| SZ_Risk | PGC2_permissive | 196383    | RILPL2         |
| SZ_Risk | PGC2_permissive | 8379      | MAD1L1         |
| SZ_Risk | PGC2_permissive | 100616160 | MIR4655        |
| SZ_Risk | PGC2_permissive | 1152      | CKB            |

|         |                 |           |            |
|---------|-----------------|-----------|------------|
| SZ_Risk | PGC2_permissive | 115708    | TRMT61A    |
| SZ_Risk | PGC2_permissive | 9529      | BAG5       |
| SZ_Risk | PGC2_permissive | 84334     | APOPT1     |
| SZ_Risk | PGC2_permissive | 3831      | KLC1       |
| SZ_Risk | PGC2_permissive | 7517      | XRCC3      |
| SZ_Risk | PGC2_permissive | 79038     | ZFYVE21    |
| SZ_Risk | PGC2_permissive | 23368     | PPP1R13B   |
| SZ_Risk | PGC2_permissive | 57688     | ZSWIM6     |
| SZ_Risk | PGC2_permissive | 619434    | LINC00051  |
| SZ_Risk | PGC2_permissive | 203062    | TSNARE1    |
| SZ_Risk | PGC2_permissive | 83943     | IMMP2L     |
| SZ_Risk | PGC2_permissive | 6925      | TCF4       |
| SZ_Risk | PGC2_permissive | 64116     | SLC39A8    |
| SZ_Risk | PGC2_permissive | 3658      | IREB2      |
| SZ_Risk | PGC2_permissive | 5685      | PSMA4      |
| SZ_Risk | PGC2_permissive | 1138      | CHRNA5     |
| SZ_Risk | PGC2_permissive | 1136      | CHRNA3     |
| SZ_Risk | PGC2_permissive | 1143      | CHRNA4     |
| SZ_Risk | PGC2_permissive | 5045      | FURIN      |
| SZ_Risk | PGC2_permissive | 2242      | FES        |
| SZ_Risk | PGC2_permissive | 4122      | MAN2A2     |
| SZ_Risk | PGC2_permissive | 399979    | SNX19      |
| SZ_Risk | PGC2_permissive | 80303     | EFHD1      |
| SZ_Risk | PGC2_permissive | 26058     | GIGYF2     |
| SZ_Risk | PGC2_permissive | 3769      | KCNJ13     |
| SZ_Risk | PGC2_permissive | 389084    | C2orf82    |
| SZ_Risk | PGC2_permissive | 25791     | NGEF       |
| SZ_Risk | PGC2_permissive | 9881      | TRANK1     |
| SZ_Risk | PGC2_permissive | 4900      | NRGN       |
| SZ_Risk | PGC2_permissive | 23584     | VSIG2      |
| SZ_Risk | PGC2_permissive | 90952     | ESAM       |
| SZ_Risk | PGC2_permissive | 79684     | MSANTD2    |
| SZ_Risk | PGC2_permissive | 4035      | LRP1       |
| SZ_Risk | PGC2_permissive | 100302201 | MIR1228    |
| SZ_Risk | PGC2_permissive | 11247     | NXP4       |
| SZ_Risk | PGC2_permissive | 6472      | SHMT2      |
| SZ_Risk | PGC2_permissive | 56901     | NDUFA4L2   |
| SZ_Risk | PGC2_permissive | 246329    | STAC3      |
| SZ_Risk | PGC2_permissive | 22864     | R3HDM2     |
| SZ_Risk | PGC2_permissive | 100302237 | MIR1281    |
| SZ_Risk | PGC2_permissive | 2033      | EP300      |
| SZ_Risk | PGC2_permissive | 83746     | L3MBTL2    |
| SZ_Risk | PGC2_permissive | 150356    | CHADL      |
| SZ_Risk | PGC2_permissive | 5905      | RANGAP1    |
| SZ_Risk | PGC2_permissive | 91752     | ZNF804A    |
| SZ_Risk | PGC2_permissive | 22997     | IGSF9B     |
| SZ_Risk | PGC2_permissive | 91526     | ANKRD44    |
| SZ_Risk | PGC2_permissive | 23451     | SF3B1      |
| SZ_Risk | PGC2_permissive | 80219     | COQ10B     |
| SZ_Risk | PGC2_permissive | 3329      | HSPD1      |
| SZ_Risk | PGC2_permissive | 3336      | HSPE1      |
| SZ_Risk | PGC2_permissive | 100529241 | HSPE1-MOB4 |
| SZ_Risk | PGC2_permissive | 25843     | MOB4       |
| SZ_Risk | PGC2_permissive | 130132    | RFTN2      |
| SZ_Risk | PGC2_permissive | 92935     | MARS2      |
| SZ_Risk | PGC2_permissive | 66037     | BOLL       |
| SZ_Risk | PGC2_permissive | 5334      | PLCL1      |
| SZ_Risk | PGC2_permissive | 90993     | CREB3L1    |

|         |                 |           |                |
|---------|-----------------|-----------|----------------|
| SZ_Risk | PGC2_permissive | 8525      | DGKZ           |
| SZ_Risk | PGC2_permissive | 100616368 | MIR4688        |
| SZ_Risk | PGC2_permissive | 4192      | MDK            |
| SZ_Risk | PGC2_permissive | 1132      | CHRM4          |
| SZ_Risk | PGC2_permissive | 55626     | AMBRA1         |
| SZ_Risk | PGC2_permissive | 100422827 | MIR3160-1      |
| SZ_Risk | PGC2_permissive | 100422825 | MIR3160-2      |
| SZ_Risk | PGC2_permissive | 283254    | HARBI1         |
| SZ_Risk | PGC2_permissive | 9776      | ATG13          |
| SZ_Risk | PGC2_permissive | 392       | ARHGAP1        |
| SZ_Risk | PGC2_permissive | 79797     | ZNF408         |
| SZ_Risk | PGC2_permissive | 2147      | F2             |
| SZ_Risk | PGC2_permissive | 9793      | CKAP5          |
| SZ_Risk | PGC2_permissive | 8911      | CACNA1I        |
| SZ_Risk | PGC2_permissive | 783       | CACNB2         |
| SZ_Risk | PGC2_permissive | 11188     | NISCH          |
| SZ_Risk | PGC2_permissive | 23166     | STAB1          |
| SZ_Risk | PGC2_permissive | 64943     | NT5DC2         |
| SZ_Risk | PGC2_permissive | 55193     | PBRM1          |
| SZ_Risk | PGC2_permissive | 26354     | GNL3           |
| SZ_Risk | PGC2_permissive | 692089    | SNORD19        |
| SZ_Risk | PGC2_permissive | 100113381 | SNORD19B       |
| SZ_Risk | PGC2_permissive | 692109    | SNORD69        |
| SZ_Risk | PGC2_permissive | 55830     | GLT8D1         |
| SZ_Risk | PGC2_permissive | 28972     | SPCS1          |
| SZ_Risk | PGC2_permissive | 6787      | NEK4           |
| SZ_Risk | PGC2_permissive | 3697      | ITIH1          |
| SZ_Risk | PGC2_permissive | 3699      | ITIH3          |
| SZ_Risk | PGC2_permissive | 3700      | ITIH4          |
| SZ_Risk | PGC2_permissive | 389125    | MUSTN1         |
| SZ_Risk | PGC2_permissive | 100526772 | TMEM110-MUSTN1 |
| SZ_Risk | PGC2_permissive | 375346    | TMEM110        |
| SZ_Risk | PGC2_permissive | 152330    | CNTN4          |
| SZ_Risk | PGC2_permissive | 5523      | PPP2R3A        |
| SZ_Risk | PGC2_permissive | 55167     | MSL2           |
| SZ_Risk | PGC2_permissive | 5096      | PCCB           |
| SZ_Risk | PGC2_permissive | 10274     | STAG1          |
| SZ_Risk | PGC2_permissive | 80723     | SLC35G2        |
| SZ_Risk | PGC2_permissive | 4690      | NCK1           |
| SZ_Risk | PGC2_permissive | 8087      | FXR1           |
| SZ_Risk | PGC2_permissive | 131118    | DNAJC19        |
| SZ_Risk | PGC2_permissive | 140679    | SLC32A1        |
| SZ_Risk | PGC2_permissive | 79913     | ACTR5          |
| SZ_Risk | PGC2_permissive | 26051     | PPP1R16B       |
| SZ_Risk | PGC2_permissive | 81603     | TRIM8          |
| SZ_Risk | PGC2_permissive | 403       | ARL3           |
| SZ_Risk | PGC2_permissive | 57188     | ADAMTSL3       |
| SZ_Risk | PGC2_permissive | 100505679 | LOC100505679   |
| SZ_Risk | PGC2_permissive | 440300    | LOC440300      |
| SZ_Risk | PGC2_permissive | 388152    | LOC388152      |
| SZ_Risk | PGC2_permissive | 643707    | GOLGA6L4       |
| SZ_Risk | PGC2_permissive | 440299    | DNM1P41        |
| SZ_Risk | PGC2_permissive | 374650    | GOLGA6L5       |
| SZ_Risk | PGC2_permissive | 388165    | UBE2Q2P1       |
| SZ_Risk | PGC2_permissive | 54993     | ZSCAN2         |
| SZ_Risk | PGC2_permissive | 2913      | GRM3           |
| SZ_Risk | PGC2_permissive | 26470     | SEZ6L2         |
| SZ_Risk | PGC2_permissive | 253982    | ASPHD1         |

|         |                 |           |           |
|---------|-----------------|-----------|-----------|
| SZ_Risk | PGC2_permissive | 253980    | KCTD13    |
| SZ_Risk | PGC2_permissive | 124446    | TMEM219   |
| SZ_Risk | PGC2_permissive | 9344      | TAOK2     |
| SZ_Risk | PGC2_permissive | 8479      | HIRIP3    |
| SZ_Risk | PGC2_permissive | 283899    | INO80E    |
| SZ_Risk | PGC2_permissive | 8448      | DOC2A     |
| SZ_Risk | PGC2_permissive | 146378    | C16orf92  |
| SZ_Risk | PGC2_permissive | 83723     | FAM57B    |
| SZ_Risk | PGC2_permissive | 226       | ALDOA     |
| SZ_Risk | PGC2_permissive | 5531      | PPP4C     |
| SZ_Risk | PGC2_permissive | 6911      | TBX6      |
| SZ_Risk | PGC2_permissive | 83719     | YPEL3     |
| SZ_Risk | PGC2_permissive | 79153     | GDPD3     |
| SZ_Risk | PGC2_permissive | 5595      | MAPK3     |
| SZ_Risk | PGC2_permissive | 1813      | DRD2      |
| SZ_Risk | PGC2_permissive | 100422855 | MIR4301   |
| SZ_Risk | PGC2_permissive | 5792      | PTPRF     |
| SZ_Risk | PGC2_permissive | 9682      | KDM4A     |
| SZ_Risk | PGC2_permissive | 488       | ATP2A2    |
| SZ_Risk | PGC2_permissive | 9892      | SNAP91    |
| SZ_Risk | PGC2_permissive | 56957     | OTUD7B    |
| SZ_Risk | PGC2_permissive | 11311     | VPS45     |
| SZ_Risk | PGC2_permissive | 51177     | PLEKHO1   |
| SZ_Risk | PGC2_permissive | 81611     | ANP32E    |
| SZ_Risk | PGC2_permissive | 23632     | CA14      |
| SZ_Risk | PGC2_permissive | 51107     | APH1A     |
| SZ_Risk | PGC2_permissive | 79630     | C1orf54   |
| SZ_Risk | PGC2_permissive | 148523    | C1orf51   |
| SZ_Risk | PGC2_permissive | 23293     | SMG6      |
| SZ_Risk | PGC2_permissive | 63826     | SRR       |
| SZ_Risk | PGC2_permissive | 55720     | TSR1      |
| SZ_Risk | PGC2_permissive | 692208    | SNORD91B  |
| SZ_Risk | PGC2_permissive | 692207    | SNORD91A  |
| SZ_Risk | PGC2_permissive | 55964     | SEPT3     |
| SZ_Risk | PGC2_permissive | 164684    | WBP2NL    |
| SZ_Risk | PGC2_permissive | 4668      | NAGA      |
| SZ_Risk | PGC2_permissive | 150368    | FAM109B   |
| SZ_Risk | PGC2_permissive | 4700      | NDUFA6    |
| SZ_Risk | PGC2_permissive | 1565      | CYP2D6    |
| SZ_Risk | PGC2_permissive | 1564      | CYP2D7P1  |
| SZ_Risk | PGC2_permissive | 6942      | TCF20     |
| SZ_Risk | PGC2_permissive | 388906    | LOC388906 |
| SZ_Risk | PGC2_permissive | 9628      | RGS6      |
| SZ_Risk | PGC2_permissive | 57476     | GRAMD1B   |
| SZ_Risk | PGC2_permissive | 50651     | SLC45A1   |
| SZ_Risk | PGC2_permissive | 473       | RERE      |
| SZ_Risk | PGC2_permissive | 6733      | SRPK2     |
| SZ_Risk | PGC2_permissive | 9745      | ZNF536    |
| SZ_Risk | PGC2_permissive | 9651      | PLCH2     |
| SZ_Risk | PGC2_permissive | 10806     | SDCCAG8   |
| SZ_Risk | PGC2_permissive | 2107      | ETF1      |
| SZ_Risk | PGC2_permissive | 3313      | HSPA9     |
| SZ_Risk | PGC2_permissive | 26785     | SNORD63   |
| SZ_Risk | PGC2_permissive | 2903      | GRIN2A    |
| SZ_Risk | PGC2_permissive | 10743     | RAI1      |
| SZ_Risk | PGC2_permissive | 6720      | SREBF1    |
| SZ_Risk | PGC2_permissive | 693120    | MIR33B    |
| SZ_Risk | PGC2_permissive | 146691    | TOM1L2    |

|         |                 |           |           |
|---------|-----------------|-----------|-----------|
| SZ_Risk | PGC2_permissive | 83450     | LRRC48    |
| SZ_Risk | PGC2_permissive | 91647     | ATPAF2    |
| SZ_Risk | PGC2_permissive | 79018     | GID4      |
| SZ_Risk | PGC2_permissive | 1819      | DRG2      |
| SZ_Risk | PGC2_permissive | 51168     | MYO15A    |
| SZ_Risk | PGC2_permissive | 1463      | NCAN      |
| SZ_Risk | PGC2_permissive | 404037    | HAPLN4    |
| SZ_Risk | PGC2_permissive | 53345     | TM6SF2    |
| SZ_Risk | PGC2_permissive | 57794     | SUGP1     |
| SZ_Risk | PGC2_permissive | 23383     | MAU2      |
| SZ_Risk | PGC2_permissive | 54815     | GATAD2A   |
| SZ_Risk | PGC2_permissive | 83983     | TSSK6     |
| SZ_Risk | PGC2_permissive | 51079     | NDUFA13   |
| SZ_Risk | PGC2_permissive | 374887    | YJEFN3    |
| SZ_Risk | PGC2_permissive | 148113    | CILP2     |
| SZ_Risk | PGC2_permissive | 80714     | PBX4      |
| SZ_Risk | PGC2_permissive | 5764      | PTN       |
| SZ_Risk | PGC2_permissive | 9162      | DGKI      |
| SZ_Risk | PGC2_permissive | 7444      | VRK2      |
| SZ_Risk | PGC2_permissive | 55120     | FANCL     |
| SZ_Risk | PGC2_permissive | 4750      | NEK1      |
| SZ_Risk | PGC2_permissive | 1182      | CLCN3     |
| SZ_Risk | PGC2_permissive | 54969     | C4orf27   |
| SZ_Risk | PGC2_permissive | 100616290 | MIR4529   |
| SZ_Risk | PGC2_permissive | 8452      | CUL3      |
| SZ_Risk | PGC2_permissive | 2823      | GPM6A     |
| SZ_Risk | PGC2_permissive | 23019     | CNOT1     |
| SZ_Risk | PGC2_permissive | 55238     | SLC38A7   |
| SZ_Risk | PGC2_permissive | 79144     | PPDPF     |
| SZ_Risk | PGC2_permissive | 5753      | PTK6      |
| SZ_Risk | PGC2_permissive | 6725      | SRMS      |
| SZ_Risk | PGC2_permissive | 100616252 | MIR548AJ2 |
| SZ_Risk | PGC2_permissive | 348980    | HCN1      |
| SZ_Risk | PGC2_permissive | 64919     | BCL11B    |
| SZ_Risk | PGC2_permissive | 729020    | LOC729020 |
| SZ_Risk | PGC2_permissive | 9118      | INA       |
| SZ_Risk | PGC2_permissive | 84108     | PCGF6     |
| SZ_Risk | PGC2_permissive | 6877      | TAF5      |
| SZ_Risk | PGC2_permissive | 84833     | USMG5     |
| SZ_Risk | PGC2_permissive | 100302174 | MIR1307   |
| SZ_Risk | PGC2_permissive | 22984     | PDCD11    |
| SZ_Risk | PGC2_permissive | 10690     | FUT9      |
| SZ_Risk | PGC2_permissive | 100616343 | MIR4677   |
| SZ_Risk | PGC2_permissive | 4325      | MMP16     |
| SZ_Risk | PGC2_permissive | 2053      | EPHX2     |
| SZ_Risk | PGC2_permissive | 1191      | CLU       |
| SZ_Risk | PGC2_permissive | 286042    | FAM86B3P  |
| SZ_Risk | PGC2_permissive | 157285    | SGK223    |
| SZ_Risk | PGC2_permissive | 2676      | GFRA3     |
| SZ_Risk | PGC2_permissive | 995       | CDC25C    |
| SZ_Risk | PGC2_permissive | 51307     | FAM53C    |
| SZ_Risk | PGC2_permissive | 51780     | KDM3B     |
| SZ_Risk | PGC2_permissive | 132200    | C3orf49   |
| SZ_Risk | PGC2_permissive | 80145     | THOC7     |
| SZ_Risk | PGC2_permissive | 6314      | ATXN7     |
| SZ_Risk | PGC2_permissive | 100507062 | PSMD6-AS2 |
| SZ_Risk | PGC2_permissive | 9861      | PSMD6     |
| SZ_Risk | PGC2_permissive | 26122     | EPC2      |

|         |                 |           |              |
|---------|-----------------|-----------|--------------|
| SZ_Risk | PGC2_permissive | 64478     | CSMD1        |
| SZ_Risk | PGC2_permissive | 10000     | AKT3         |
| SZ_Risk | PGC2_permissive | 146206    | RLTPR        |
| SZ_Risk | PGC2_permissive | 65057     | ACD          |
| SZ_Risk | PGC2_permissive | 50855     | PARD6A       |
| SZ_Risk | PGC2_permissive | 388284    | C16orf86     |
| SZ_Risk | PGC2_permissive | 81577     | GFOD2        |
| SZ_Risk | PGC2_permissive | 57610     | RANBP10      |
| SZ_Risk | PGC2_permissive | 55815     | TSNAXIP1     |
| SZ_Risk | PGC2_permissive | 80152     | CENPT        |
| SZ_Risk | PGC2_permissive | 57215     | THAP11       |
| SZ_Risk | PGC2_permissive | 10204     | NUTF2        |
| SZ_Risk | PGC2_permissive | 23644     | EDC4         |
| SZ_Risk | PGC2_permissive | 123904    | NRN1L        |
| SZ_Risk | PGC2_permissive | 5681      | PSKH1        |
| SZ_Risk | PGC2_permissive | 1506      | CTRL         |
| SZ_Risk | PGC2_permissive | 5699      | PSMB10       |
| SZ_Risk | PGC2_permissive | 3931      | LCAT         |
| SZ_Risk | PGC2_permissive | 6560      | SLC12A4      |
| SZ_Risk | PGC2_permissive | 64180     | DPEP3        |
| SZ_Risk | PGC2_permissive | 64174     | DPEP2        |
| SZ_Risk | PGC2_permissive | 55794     | DDX28        |
| SZ_Risk | PGC2_permissive | 4775      | NFATC3       |
| SZ_Risk | PGC2_permissive | 80004     | ESRP2        |
| SZ_Risk | PGC2_permissive | 23659     | PLA2G15      |
| SZ_Risk | PGC2_permissive | 9057      | SLC7A6       |
| SZ_Risk | PGC2_permissive | 2309      | FOXO3        |
| SZ_Risk | PGC2_permissive | 23314     | SATB2        |
| SZ_Risk | PGC2_permissive | 100505474 | LOC100505474 |
| SZ_Risk | PGC2_permissive | 55568     | GALNT10      |
| SZ_Risk | PGC2_permissive | 100616347 | MIR548AI     |
| SZ_Risk | PGC2_permissive | 5587      | PRKD1        |
| SZ_Risk | PGC2_permissive | 2272      | FHIT         |
| SZ_Risk | PGC2_permissive | 57282     | SLC4A10      |
| SZ_Risk | PGC2_permissive | 1803      | DPP4         |
| SZ_Risk | PGC2_permissive | 55552     | ZNF823       |
| SZ_Risk | PGC2_permissive | 56924     | PAK6         |
| SZ_Risk | PGC2_permissive | 100131244 | ANKRD63      |
| SZ_Risk | PGC2_permissive | 5330      | PLCB2        |
| SZ_Risk | PGC2_permissive | 6721      | SREBF2       |
| SZ_Risk | PGC2_permissive | 407039    | MIR33A       |
| SZ_Risk | PGC2_permissive | 440829    | SHISA8       |
| SZ_Risk | PGC2_permissive | 115650    | TNFRSF13C    |
| SZ_Risk | PGC2_permissive | 79019     | CENPM        |
| SZ_Risk | PGC2_permissive | 339674    | LINC00634    |
| SZ_Risk | PGC2_permissive | 9779      | TBC1D5       |
| SZ_Risk | PGC2_permissive | 64506     | CPEB1        |
| SZ_Risk | PGC2_permissive | 283692    | LOC283692    |
| SZ_Risk | PGC2_permissive | 8120      | AP3B2        |
| SZ_Risk | PGC2_permissive | 338963    | LOC338963    |
| SZ_Risk | PGC2_permissive | 219790    | RTKN2        |
| SZ_Risk | PGC2_permissive | 710       | SERPING1     |
| SZ_Risk | PGC2_permissive | 406919    | MIR130A      |
| SZ_Risk | PGC2_permissive | 219539    | YPEL4        |
| SZ_Risk | PGC2_permissive | 10978     | CLP1         |
| SZ_Risk | PGC2_permissive | 25921     | ZDHHC5       |
| SZ_Risk | PGC2_permissive | 219541    | MED19        |
| SZ_Risk | PGC2_permissive | 51075     | TMX2         |

|         |                 |           |              |
|---------|-----------------|-----------|--------------|
| SZ_Risk | PGC2_permissive | 100528016 | TMX2-CTNND1  |
| SZ_Risk | PGC2_permissive | 643376    | BTBD18       |
| SZ_Risk | PGC2_permissive | 1500      | CTNND1       |
| SZ_Risk | PGC2_permissive | 22999     | RIMS1        |
| SZ_Risk | PGC2_permissive | 83857     | TMTC1        |
| SZ_Risk | PGC2_permissive | 90342     | FER1L5       |
| SZ_Risk | PGC2_permissive | 81562     | LMAN2L       |
| SZ_Risk | PGC2_permissive | 26504     | CNNM4        |
| SZ_Risk | PGC2_permissive | 100422928 | MIR3127      |
| SZ_Risk | PGC2_permissive | 26505     | CNNM3        |
| SZ_Risk | PGC2_permissive | 200539    | ANKRD23      |
| SZ_Risk | PGC2_permissive | 51239     | ANKRD39      |
| SZ_Risk | PGC2_permissive | 54910     | SEMA4C       |
| SZ_Risk | PGC2_permissive | 51252     | FAM178B      |
| SZ_Risk | PGC2_permissive | 344558    | SH3RF3       |
| SZ_Risk | PGC2_permissive | 151011    | SEPT10       |
| SZ_Risk | PGC2_permissive | 65124     | SOWAHC       |
| SZ_Risk | PGC2_permissive | 1054      | CEBPG        |
| SZ_Risk | PGC2_permissive | 5184      | PEPD         |
| SZ_Risk | PGC2_permissive | 7840      | ALMS1        |
| SZ_Risk | PGC2_permissive | 9027      | NAT8         |
| SZ_Risk | PGC2_permissive | 200420    | ALMS1P       |
| SZ_Risk | PGC2_permissive | 645323    | LINC00461    |
| SZ_Risk | PGC2_permissive | 407047    | MIR9-2       |
| SZ_Risk | PGC2_permissive | 4208      | MEF2C        |
| SZ_Risk | PGC2_permissive | 389549    | FEZF1        |
| SZ_Risk | PGC2_permissive | 154860    | FEZF1-AS1    |
| SZ_Risk | PGC2_permissive | 93664     | CADPS2       |
| SZ_Risk | PGC2_permissive | 9553      | MRPL33       |
| SZ_Risk | PGC2_permissive | 64080     | RBKS         |
| SZ_Risk | PGC2_permissive | 100302650 | BRE-AS1      |
| SZ_Risk | PGC2_permissive | 9577      | BRE          |
| SZ_Risk | PGC2_permissive | 100422965 | MIR4263      |
| SZ_Risk | PGC2_permissive | 4124      | MAN2A1       |
| SZ_Risk | PGC2_permissive | 100289673 | LOC100289673 |
| SZ_Risk | PGC2_permissive | 29123     | ANKRD11      |
| SZ_Risk | PGC2_permissive | 6687      | SPG7         |
| SZ_Risk | PGC2_permissive | 6137      | RPL13        |
| SZ_Risk | PGC2_permissive | 606500    | SNORD68      |
| SZ_Risk | PGC2_permissive | 51201     | ZDHHC2       |
| SZ_Risk | PGC2_permissive | 3745      | KCNB1        |
| SZ_Risk | PGC2_permissive | 5740      | PTGIS        |
| SZ_Risk | PGC2_permissive | 27086     | FOXP1        |
| SZ_Risk | PGC2_permissive | 56603     | CYP26B1      |
| SZ_Risk | PGC2_permissive | 22979     | EFR3B        |
| SZ_Risk | PGC2_permissive | 222223    | KIAA1324L    |
| SZ_Risk | PGC2_permissive | 9988      | DMTF1        |
| SZ_Risk | PGC2_permissive | 11257     | TP53TG1      |
| SZ_Risk | PGC2_permissive | 55714     | TENM3        |
| SZ_Risk | PGC2_permissive | 100873932 | DPYD-AS1     |
| SZ_Risk | PGC2_permissive | 5521      | PPP2R2B      |
| SZ_Risk | PGC2_permissive | 100874361 | PPP2R2B-IT1  |
| SZ_Risk | PGC2_permissive | 280655    | IGBP1P1      |
| SZ_Risk | PGC2_permissive | 6729      | SRP54        |
| SZ_Risk | PGC2_permissive | 283635    | FAM177A1     |
| SZ_Risk | PGC2_permissive | 55012     | PPP2R3C      |
| SZ_Risk | PGC2_permissive | 9692      | KIAA0391     |
| SZ_Risk | PGC2_permissive | 5687      | PSMA6        |

|         |                 |           |             |
|---------|-----------------|-----------|-------------|
| SZ_Risk | PGC2_permissive | 2016      | EMX1        |
| SZ_Risk | PGC2_permissive | 94097     | SFXN5       |
| SZ_Risk | PGC2_permissive | 22990     | PCNX        |
| SZ_Risk | PGC2_permissive | 1379      | CR1L        |
| SZ_Risk | PGC2_permissive | 4179      | CD46        |
| SZ_Risk | PGC2_permissive | 407026    | MIR29C      |
| SZ_Risk | PGC2_permissive | 407025    | MIR29B2     |
| SZ_Risk | PGC2_permissive | 148696    | LOC148696   |
| SZ_Risk | PGC2_permissive | 90025     | UBE3D       |
| SZ_Risk | PGC2_permissive | 23033     | DOPEY1      |
| SZ_Risk | PGC2_permissive | 5238      | PGM3        |
| SZ_Risk | PGC2_permissive | 112611    | RWDD2A      |
| SZ_Risk | PGC2_permissive | 399947    | C11orf87    |
| SZ_Risk | PGC2_permissive | 225689    | MAPK15      |
| SZ_Risk | PGC2_permissive | 286077    | FAM83H      |
| SZ_Risk | PGC2_permissive | 100616318 | MIR4664     |
| SZ_Risk | PGC2_permissive | 23513     | SCRIB       |
| SZ_Risk | PGC2_permissive | 23081     | KDM4C       |
| SZ_Risk | PGC2_permissive | 2185      | PTK2B       |
| SZ_Risk | PGC2_permissive | 1135      | CHRNA2      |
| SZ_Risk | PGC2_permissive | 4985      | OPRD1       |
| SZ_Risk | PGC2_permissive | 5592      | PRKG1       |
| SZ_Risk | PGC2_permissive | 6866      | TAC3        |
| SZ_Risk | PGC2_permissive | 4640      | MYO1A       |
| SZ_Risk | PGC2_permissive | 23306     | TMEM194A    |
| SZ_Risk | PGC2_permissive | 4665      | NAB2        |
| SZ_Risk | PGC2_permissive | 6778      | STAT6       |
| SZ_Risk | PGC2_permissive | 51070     | NOSIP       |
| SZ_Risk | PGC2_permissive | 5639      | PRRG2       |
| SZ_Risk | PGC2_permissive | 57479     | PRR12       |
| SZ_Risk | PGC2_permissive | 6237      | RRAS        |
| SZ_Risk | PGC2_permissive | 58506     | SCAF1       |
| SZ_Risk | PGC2_permissive | 7088      | TLE1        |
| SZ_Risk | PGC2_permissive | 5520      | PPP2R2A     |
| SZ_Risk | PGC2_permissive | 665       | BNIP3L      |
| SZ_Risk | PGC2_permissive | 6770      | STAR        |
| SZ_Risk | PGC2_permissive | 27257     | LSM1        |
| SZ_Risk | PGC2_permissive | 9530      | BAG4        |
| SZ_Risk | PGC2_permissive | 23259     | DDHD2       |
| SZ_Risk | PGC2_permissive | 84513     | PPAPDC1B    |
| SZ_Risk | PGC2_permissive | 54904     | WHSC1L1     |
| SZ_Risk | PGC2_permissive | 137994    | LETM2       |
| SZ_Risk | PGC2_permissive | 2260      | FGFR1       |
| SZ_Risk | PGC2_permissive | 440594    | FLJ31662    |
| SZ_Risk | PGC2_permissive | 11278     | KLF12       |
| SZ_Risk | PGC2_permissive | 441389    | FLJ35282    |
| SZ_Risk | PGC2_permissive | 27303     | RBMS3       |
| SZ_Risk | PGC2_permissive | 23362     | PSD3        |
| SZ_Risk | PGC2_permissive | 26084     | ARHGEF26    |
| SZ_Risk | PGC2_permissive | 54715     | RBFOX1      |
| SZ_Risk | PGC2_permissive | 100529144 | CORO7-PAM16 |
| SZ_Risk | PGC2_permissive | 79585     | CORO7       |
| SZ_Risk | PGC2_permissive | 114990    | VASN        |
| SZ_Risk | PGC2_permissive | 9093      | DNAJA3      |
| SZ_Risk | PGC2_permissive | 57407     | NMRAL1      |
| SZ_Risk | PGC2_permissive | 3163      | HMOX2       |
| SZ_Risk | PGC2_permissive | 342346    | C16orf96    |
| SZ_Risk | PGC2_permissive | 4482      | MSRA        |



|         |                 |           |                |
|---------|-----------------|-----------|----------------|
| SZ_Risk | PGC2_permissive | 5142      | PDE4B          |
| SZ_Risk | PGC2_permissive | 6457      | SH3GL3         |
| SZ_Risk | PGC2_permissive | 53335     | BCL11A         |
| SZ_Risk | PGC2_permissive | 27095     | TRAPPC3        |
| SZ_Risk | PGC2_permissive | 55700     | MAP7D1         |
| SZ_Risk | PGC2_permissive | 23774     | BRD1           |
| SZ_Risk | PGC2_permissive | 90834     | LOC90834       |
| SZ_Risk | PGC2_permissive | 9889      | ZBED4          |
| SZ_Risk | PGC2_permissive | 79087     | ALG12          |
| SZ_Risk | PGC2_permissive | 79174     | CRELD2         |
| SZ_Risk | PGC2_permissive | 22871     | NLGN1          |
| SZ_Risk | PGC2_permissive | 4916      | NTRK3          |
| SZ_Risk | PGC2_permissive | 100874179 | LINC00457      |
| SZ_Risk | PGC2_permissive | 9472      | AKAP6          |
| SZ_Risk | PGC2_permissive | 8715      | NOL4           |
| SZ_Risk | PGC2_permissive | 51678     | MPP6           |
| SZ_Risk | PGC2_permissive | 1687      | DFNA5          |
| SZ_Risk | PGC2_permissive | 26031     | OSBPL3         |
| SZ_Risk | PGC2_permissive | 929       | CD14           |
| SZ_Risk | PGC2_permissive | 55374     | TMCO6          |
| SZ_Risk | PGC2_permissive | 4695      | NDUFA2         |
| SZ_Risk | PGC2_permissive | 3550      | IK             |
| SZ_Risk | PGC2_permissive | 100500820 | MIR3655        |
| SZ_Risk | PGC2_permissive | 54853     | WDR55          |
| SZ_Risk | PGC2_permissive | 373863    | DND1           |
| SZ_Risk | PGC2_permissive | 3035      | HARS           |
| SZ_Risk | PGC2_permissive | 23438     | HARS2          |
| SZ_Risk | PGC2_permissive | 153527    | ZMAT2          |
| SZ_Risk | PGC2_permissive | 56664     | VTRNA1-1       |
| SZ_Risk | PGC2_permissive | 56663     | VTRNA1-2       |
| SZ_Risk | PGC2_permissive | 56662     | VTRNA1-3       |
| SZ_Risk | PGC2_permissive | 56147     | PCDHA1         |
| SZ_Risk | PGC2_permissive | 56146     | PCDHA2         |
| SZ_Risk | PGC2_permissive | 56145     | PCDHA3         |
| SZ_Risk | PGC2_permissive | 56144     | PCDHA4         |
| SZ_Risk | PGC2_permissive | 56143     | PCDHA5         |
| SZ_Risk | PGC2_permissive | 56142     | PCDHA6         |
| SZ_Risk | PGC2_permissive | 56141     | PCDHA7         |
| SZ_Risk | PGC2_permissive | 56140     | PCDHA8         |
| SZ_Risk | PGC2_permissive | 9752      | PCDHA9         |
| SZ_Risk | PGC2_permissive | 56139     | PCDHA10        |
| SZ_Risk | PGC2_permissive | 100113403 | LINC00577      |
| SZ_Risk | PGC2_permissive | 389421    | LIN28B         |
| SZ_Risk | PGC2_permissive | 133418    | EMB            |
| SZ_Risk | PGC2_permissive | 29896     | TRA2A          |
| SZ_Risk | PGC2_permissive | 1197      | CLK2P          |
| SZ_Risk | PGC2_permissive | 90693     | CCDC126        |
| SZ_Risk | PGC2_permissive | 25896     | INTS7          |
| SZ_Risk | PGC2_permissive | 353189    | SLCO4C1        |
| SZ_Risk | PGC2_permissive | 133482    | SLCO6A1        |
| SZ_Risk | PGC2_permissive | 26056     | RAB11FIP5      |
| SZ_Risk | PGC2_permissive | 196385    | DNAH10         |
| SZ_Risk | PGC2_permissive | 80212     | CCDC92         |
| SZ_Risk | PGC2_permissive | 144348    | ZNF664         |
| SZ_Risk | PGC2_permissive | 100533183 | ZNF664-FAM101A |
| SZ_Risk | PGC2_permissive | 1081      | CGA            |
| SZ_Risk | PGC2_permissive | 23036     | ZNF292         |
| SZ_Risk | PGC2_permissive | 375519    | GJB7           |

|         |                 |           |              |
|---------|-----------------|-----------|--------------|
| SZ_Risk | PGC2_permissive | 206412    | C6orf163     |
| SZ_Risk | PGC2_permissive | 63914     | C6orf164     |
| SZ_Risk | PGC2_permissive | 154313    | C6orf165     |
| SZ_Risk | PGC2_permissive | 10559     | SLC35A1      |
| SZ_Risk | PGC2_permissive | 6252      | RTN1         |
| SZ_Risk | PGC2_permissive | 84059     | GPR98        |
| SZ_Risk | PGC2_permissive | 26010     | SPATS2L      |
| SZ_Risk | PGC2_permissive | 79886     | CAAP1        |
| SZ_Risk | PGC2_permissive | 9373      | PLAA         |
| SZ_Risk | PGC2_permissive | 140803    | TRPM6        |
| SZ_Risk | PGC2_permissive | 7086      | TKT          |
| SZ_Risk | PGC2_permissive | 55802     | DCP1A        |
| SZ_Risk | PGC2_permissive | 776       | CACNA1D      |
| SZ_Risk | PGC2_permissive | 3990      | LIPC         |
| SZ_Risk | PGC2_permissive | 83698     | CALN1        |
| SZ_Risk | PGC2_permissive | 9568      | GABBR2       |
| SZ_Risk | PGC2_permissive | 80309     | SPHKAP       |
| SZ_Risk | PGC2_permissive | 100128239 | LOC100128239 |
| SZ_Risk | PGC2_permissive | 5243      | ABCB1        |
| SZ_Risk | PGC2_permissive | 154661    | RUNDC3B      |
| SZ_Risk | PGC2_permissive | 55972     | SLC25A40     |
| SZ_Risk | PGC2_permissive | 10926     | DBF4         |
| SZ_Risk | PGC2_permissive | 53616     | ADAM22       |
| SZ_Risk | PGC2_permissive | 1385      | CREB1        |
| SZ_Risk | PGC2_permissive | 151194    | METTTL21A    |
| SZ_Risk | PGC2_permissive | 100874128 | LINC00333    |
| SZ_Risk | PGC2_permissive | 114818    | KLHL29       |
| SZ_Risk | PGC2_permissive | 100616119 | MIR4697      |
| SZ_Risk | PGC2_permissive | 6671      | SP4          |
| SZ_Risk | PGC2_permissive | 57186     | RALGAPA2     |
| SZ_Risk | PGC2_permissive | 10082     | GPC6         |
| SZ_Risk | PGC2_permissive | 100873973 | GPC6-AS2     |
| SZ_Risk | PGC2_permissive | 29881     | NPC1L1       |
| SZ_Risk | PGC2_permissive | 54606     | DDX56        |
| SZ_Risk | PGC2_permissive | 54970     | TTC12        |
| SZ_Risk | PGC2_permissive | 255239    | ANKK1        |
| SZ_Risk | PGC2_permissive | 10454     | TAB1         |
| SZ_Risk | PGC2_permissive | 100506472 | LOC100506472 |
| SZ_Risk | PGC2_permissive | 4248      | MGAT3        |
| SZ_Risk | PGC2_permissive | 2917      | GRM7         |
| SZ_Risk | PGC2_permissive | 10750     | GRAP         |
| SZ_Risk | PGC2_permissive | 400581    | GRAPL        |
| SZ_Risk | PGC2_permissive | 22905     | EPN2         |
| SZ_Risk | PGC2_permissive | 100874309 | EPN2-IT1     |
| SZ_Risk | PGC2_permissive | 100874018 | EPN2-AS1     |
| SZ_Risk | PGC2_permissive | 27077     | B9D1         |
| SZ_Risk | PGC2_permissive | 100302256 | MIR1180      |
| SZ_Risk | PGC2_permissive | 5598      | MAPK7        |
| SZ_Risk | PGC2_permissive | 4239      | MFAP4        |
| SZ_Risk | PGC2_permissive | 7732      | RNF112       |
| SZ_Risk | PGC2_permissive | 2202      | EFEMP1       |
| SZ_Risk | PGC2_permissive | 406999    | MIR217       |
| SZ_Risk | PGC2_permissive | 406998    | MIR216A      |
| SZ_Risk | PGC2_permissive | 3624      | INHBA        |
| SZ_Risk | PGC2_permissive | 285954    | INHBA-AS1    |
| SZ_Risk | PGC2_permissive | 4978      | OPCML        |
| SZ_Risk | PGC2_permissive | 285370    | LINC00606    |
| SZ_Risk | PGC2_permissive | 6900      | CNTN2        |

|         |                 |        |           |
|---------|-----------------|--------|-----------|
| SZ_Risk | PGC2_permissive | 388730 | TMEM81    |
| SZ_Risk | PGC2_permissive | 5929   | RBBP5     |
| SZ_Risk | PGC2_permissive | 25778  | DSTYK     |
| SZ_Risk | PGC2_permissive | 9911   | TMCC2     |
| SZ_Risk | PGC2_permissive | 2904   | GRIN2B    |
| SZ_Risk | PGC2_permissive | 79840  | NHEJ1     |
| SZ_Risk | PGC2_permissive | 151295 | SLC23A3   |
| SZ_Risk | PGC2_permissive | 27013  | CNPPD1    |
| SZ_Risk | PGC2_permissive | 79137  | FAM134A   |
| SZ_Risk | PGC2_permissive | 130617 | ZFAND2B   |
| SZ_Risk | PGC2_permissive | 10058  | ABCB6     |
| SZ_Risk | PGC2_permissive | 84630  | TTBK1     |
| SZ_Risk | PGC2_permissive | 10864  | SLC22A7   |
| SZ_Risk | PGC2_permissive | 401262 | CRIP3     |
| SZ_Risk | PGC2_permissive | 24149  | ZNF318    |
| SZ_Risk | PGC2_permissive | 89845  | ABCC10    |
| SZ_Risk | PGC2_permissive | 65989  | DLK2      |
| SZ_Risk | PGC2_permissive | 11344  | TWF2      |
| SZ_Risk | PGC2_permissive | 132160 | PPM1M     |
| SZ_Risk | PGC2_permissive | 80335  | WDR82     |
| SZ_Risk | PGC2_permissive | 406890 | MIRLET7G  |
| SZ_Risk | PGC2_permissive | 132158 | GLYCTK    |
| SZ_Risk | PGC2_permissive | 406925 | MIR135A1  |
| SZ_Risk | PGC2_permissive | 25981  | DNAH1     |
| SZ_Risk | PGC2_permissive | 8314   | BAP1      |
| SZ_Risk | PGC2_permissive | 51533  | PHF7      |
| SZ_Risk | PGC2_permissive | 169792 | GLIS3     |
| SZ_Risk | PGC2_permissive | 84850  | GLIS3-AS1 |
| SZ_Risk | PGC2_permissive | 5629   | PROX1     |
| SZ_Risk | PGC2_permissive | 11216  | AKAP10    |
| SZ_Risk | PGC2_permissive | 92521  | SPECC1    |
| SZ_Risk | PGC2_permissive | 284194 | LGALS9B   |
| SZ_Risk | PGC2_permissive | 26251  | KCNG2     |
| SZ_Risk | PGC2_permissive | 80148  | PQLC1     |
| SZ_Risk | PGC2_permissive | 2788   | GNG7      |
| SZ_Risk | PGC2_permissive | 148252 | DIRAS1    |
| SZ_Risk | PGC2_permissive | 29985  | SLC39A3   |
| SZ_Risk | PGC2_permissive | 83700  | JAM3      |
| SZ_Risk | PGC2_permissive | 57521  | RPTOR     |
| SZ_Risk | PGC2_permissive | 27087  | B3GAT1    |
| SZ_Risk | PGC2_permissive | 283177 | LOC283177 |
| SZ_Risk | PGC2_permissive | 6660   | SOX5      |
| SZ_Risk | PGC2_permissive | 254531 | LPCAT4    |
| SZ_Risk | PGC2_permissive | 23015  | GOLGA8A   |
| SZ_Risk | PGC2_permissive | 79166  | LILRP2    |
| SZ_Risk | PGC2_permissive | 115653 | KIR3DL3   |
| SZ_Risk | PGC2_permissive | 221078 | NSUN6     |
| SZ_Risk | PGC2_permissive | 4842   | NOS1      |
| SZ_Risk | PGC2_permissive | 64131  | XYLT1     |
| SZ_Risk | PGC2_permissive | 5526   | PPP2R5B   |
| SZ_Risk | PGC2_permissive | 170589 | GPHA2     |
| SZ_Risk | PGC2_permissive | 283129 | C11orf85  |
| SZ_Risk | PGC2_permissive | 56899  | ANKS1B    |
| SZ_Risk | PGC2_permissive | 9839   | ZEB2      |
| SZ_Risk | PGC2_permissive | 8546   | AP3B1     |
| SZ_Risk | PGC2_permissive | 144097 | C11orf84  |
| SZ_Risk | PGC2_permissive | 2011   | MARK2     |
| SZ_Risk | PGC2_permissive | 6315   | ATXN8OS   |

|         |                 |           |              |
|---------|-----------------|-----------|--------------|
| SZ_Risk | PGC2_permissive | 80114     | BICC1        |
| SZ_Risk | PGC2_permissive | 5980      | REV3L        |
| SZ_Risk | PGC2_permissive | 643749    | TRAF3IP2-AS1 |
| SZ_Risk | PGC2_permissive | 10758     | TRAF3IP2     |
| SZ_Risk | PGC2_permissive | 729993    | SHISA9       |
| SZ_Risk | PGC2_permissive | 51523     | CXXC5        |
| SZ_Risk | PGC2_permissive | 23237     | ARC          |
| SZ_Risk | PGC2_permissive | 8629      | JRK          |
| SZ_Risk | PGC2_permissive | 8000      | PSCA         |
| SZ_Risk | PGC2_permissive | 165721    | DNAJB8       |
| SZ_Risk | PGC2_permissive | 285224    | DNAJB8-AS1   |
| SZ_Risk | PGC2_permissive | 2624      | GATA2        |
| SZ_Risk | PGC2_permissive | 1917      | EEF1A2       |
| SZ_Risk | PGC2_permissive | 3344      | FOXN2        |
| SZ_Risk | PGC2_permissive | 129285    | PPP1R21      |
| SZ_Risk | PGC2_permissive | 1800      | DPEP1        |
| SZ_Risk | PGC2_permissive | 5119      | CHMP1A       |
| SZ_Risk | PGC2_permissive | 440279    | UNC13C       |
| SZ_Risk | PGC2_permissive | 285084    | LOC285084    |
| SZ_Risk | PGC2_permissive | 100131390 | SP9          |
| SZ_Risk | PGC2_permissive | 9541      | CIR1         |
| SZ_Risk | PGC2_permissive | 79634     | SCRN3        |
| SZ_Risk | PGC2_permissive | 9863      | MAGI2        |
| SZ_Risk | PGC2_permissive | 650794    | MIPEPP3      |
| SZ_Risk | PGC2_permissive | 253832    | ZDHHC20      |
| SZ_Risk | PGC2_permissive | 23264     | ZC3H7B       |
| SZ_Risk | PGC2_permissive | 7008      | TEF          |
| SZ_Risk | PGC2_permissive | 10766     | TOB2         |
| SZ_Risk | PGC2_permissive | 84844     | PHF5A        |
| SZ_Risk | PGC2_permissive | 50        | ACO2         |
| SZ_Risk | PGC2_permissive | 171568    | POLR3H       |
| SZ_Risk | PGC2_permissive | 27254     | CSDC2        |
| SZ_Risk | PGC2_permissive | 5372      | PMM1         |
| SZ_Risk | PGC2_permissive | 57511     | COG6         |
| SZ_Risk | PGC2_permissive | 2590      | GALNT2       |
| SZ_Risk | PGC2_permissive | 254102    | EHBP1L1      |
| SZ_Risk | PGC2_permissive | 10089     | KCNK7        |
| SZ_Risk | PGC2_permissive | 4296      | MAP3K11      |
| SZ_Risk | PGC2_permissive | 399909    | PCNXL3       |
| SZ_Risk | PGC2_permissive | 100616292 | MIR4690      |
| SZ_Risk | PGC2_permissive | 6494      | SIPA1        |
| SZ_Risk | PGC2_permissive | 100616284 | MIR4489      |
| SZ_Risk | PGC2_permissive | 5970      | RELA         |
| SZ_Risk | PGC2_permissive | 10524     | KAT5         |
| SZ_Risk | PGC2_permissive | 84153     | RNASEH2C     |
| SZ_Risk | PGC2_permissive | 8997      | KALRN        |
| SZ_Risk | PGC2_permissive | 65217     | PCDH15       |
| SZ_Risk | PGC2_permissive | 121256    | TMEM132D     |
| SZ_Risk | PGC2_permissive | 1781      | DYNC1I2      |
| SZ_Risk | PGC2_permissive | 8604      | SLC25A12     |
| SZ_Risk | PGC2_permissive | 8520      | HAT1         |
| SZ_Risk | PGC2_permissive | 254042    | METAP1D      |
| SZ_Risk | PGC2_permissive | 100128977 | MAPT-AS1     |
| SZ_Risk | PGC2_permissive | 162540    | SPPL2C       |
| SZ_Risk | PGC2_permissive | 4137      | MAPT         |
| SZ_Risk | PGC2_permissive | 100130148 | MAPT-IT1     |
| SZ_Risk | PGC2_permissive | 54662     | TBC1D13      |
| SZ_Risk | PGC2_permissive | 2021      | ENDOG        |

|         |                 |           |              |
|---------|-----------------|-----------|--------------|
| SZ_Risk | PGC2_permissive | 51490     | C9orf114     |
| SZ_Risk | PGC2_permissive | 883       | CCBL1        |
| SZ_Risk | PGC2_permissive | 56262     | LRRC8A       |
| SZ_Risk | PGC2_permissive | 22821     | RASA3        |
| SZ_Risk | PGC2_permissive | 80059     | LRRTM4       |
| SZ_Risk | PGC2_permissive | 7068      | THRB         |
| SZ_Risk | PGC2_permissive | 151126    | ZNF385B      |
| SZ_Risk | PGC2_permissive | 654502    | IQCJ         |
| SZ_Risk | PGC2_permissive | 100505385 | IQCJ-SCHIP1  |
| SZ_Risk | PGC2_permissive | 29970     | SCHIP1       |
| SZ_Risk | PGC2_permissive | 388336    | SHISA6       |
| SZ_Risk | PGC2_permissive | 150381    | LOC150381    |
| SZ_Risk | PGC2_permissive | 400931    | MIRLET7BHG   |
| SZ_Risk | PGC2_permissive | 100500828 | MIR3619      |
| SZ_Risk | PGC2_permissive | 1316      | KLF6         |
| SZ_Risk | PGC2_permissive | 54674     | LRRN3        |
| SZ_Risk | PGC2_permissive | 5579      | PRKCB        |
| SZ_Risk | PGC2_permissive | 152006    | RNF38        |
| SZ_Risk | PGC2_permissive | 1643      | DDB2         |
| SZ_Risk | PGC2_permissive | 53        | ACP2         |
| SZ_Risk | PGC2_permissive | 10062     | NR1H3        |
| SZ_Risk | PGC2_permissive | 8567      | MADD         |
| SZ_Risk | PGC2_permissive | 285671    | RNF180       |
| SZ_Risk | PGC2_permissive | 100507421 | TMEM178B     |
| SZ_Risk | PGC2_permissive | 51571     | FAM49B       |
| SZ_Risk | PGC2_permissive | 100847051 | MIR5194      |
| SZ_Risk | PGC2_permissive | 50807     | ASAP1        |
| SZ_Risk | PGC2_permissive | 29065     | ASAP1-IT1    |
| SZ_Risk | PGC2_permissive | 794       | CALB2        |
| SZ_Risk | PGC2_permissive | 8945      | BTRC         |
| SZ_Risk | PGC2_permissive | 27343     | POLL         |
| SZ_Risk | PGC2_permissive | 25911     | DPCD         |
| SZ_Risk | PGC2_permissive | 100422900 | MIR3158-1    |
| SZ_Risk | PGC2_permissive | 100423033 | MIR3158-2    |
| SZ_Risk | PGC2_permissive | 6468      | FBXW4        |
| SZ_Risk | PGC2_permissive | 10579     | TACC2        |
| SZ_Risk | PGC2_permissive | 11281     | POU6F2       |
| SZ_Risk | PGC2_permissive | 57606     | SLAIN2       |
| SZ_Risk | PGC2_permissive | 201780    | SLC10A4      |
| SZ_Risk | PGC2_permissive | 326340    | ZAR1         |
| SZ_Risk | PGC2_permissive | 285527    | FRYL         |
| SZ_Risk | PGC2_permissive | 57520     | HECW2        |
| SZ_Risk | PGC2_permissive | 107       | ADCY1        |
| SZ_Risk | PGC2_permissive | 56648     | EIF5A2       |
| SZ_Risk | PGC2_permissive | 54808     | DYM          |
| SZ_Risk | PGC2_permissive | 100616420 | MIR4744      |
| SZ_Risk | PGC2_permissive | 100129027 | LOC100129027 |
| SZ_Risk | PGC2_permissive | 744       | MPPED2       |
| SZ_Risk | PGC2_permissive | 10613     | ERLIN1       |
| SZ_Risk | PGC2_permissive | 1147      | CHUK         |
| SZ_Risk | PGC2_permissive | 55280     | CWF19L1      |
| SZ_Risk | PGC2_permissive | 677800    | SNORA12      |
| SZ_Risk | PGC2_permissive | 282991    | BLOC1S2      |
| SZ_Risk | PGC2_permissive | 9033      | PKD2L1       |
| SZ_Risk | PGC2_permissive | 22986     | SORCS3       |
| SZ_Risk | PGC2_permissive | 4784      | NFIX         |
| SZ_Risk | PGC2_permissive | 65009     | NDRG4        |
| SZ_Risk | PGC2_permissive | 79918     | SETD6        |

|         |                 |           |              |
|---------|-----------------|-----------|--------------|
| SZ_Risk | PGC2_permissive | 677827    | SNORA46      |
| SZ_Risk | PGC2_permissive | 677830    | SNORA50      |
| SZ_Risk | PGC2_permissive | 391365    | SULT6B1      |
| SZ_Risk | PGC2_permissive | 100505876 | LOC100505876 |
| SZ_Risk | PGC2_permissive | 10153     | CEBPZ        |
| SZ_Risk | PGC2_permissive | 23683     | PRKD3        |
| SZ_Risk | PGC2_permissive | 25797     | QPCT         |
| SZ_Risk | PGC2_permissive | 6345      | SRL          |
| SZ_Risk | PGC2_permissive | 149465    | WDR65        |
| SZ_Risk | PGC2_permissive | 128218    | TMEM125      |
| SZ_Risk | PGC2_permissive | 57591     | MKL1         |
| SZ_Risk | PGC2_permissive | 2847      | MCHR1        |
| SZ_Risk | PGC2_permissive | 1983      | EIF5         |
| SZ_Risk | PGC2_permissive | 677811    | SNORA28      |
| SZ_Risk | PGC2_permissive | 491       | ATP2B2       |
| SZ_Risk | PGC2_permissive | 100126334 | MIR885       |
| SZ_Risk | PGC2_permissive | 55765     | C1orf106     |
| SZ_Risk | PGC2_permissive | 23046     | KIF21B       |
| SZ_Risk | PGC2_permissive | 779       | CACNA1S      |
| SZ_Risk | PGC2_permissive | 64839     | FBXL17       |
| SZ_Risk | PGC2_permissive | 9912      | ARHGAP44     |
| SZ_Risk | PGC2_permissive | 60528     | ELAC2        |
| SZ_Risk | PGC2_permissive | 257194    | NEGR1        |
| SZ_Risk | PGC2_permissive | 64400     | AKTIP        |
| SZ_Risk | PGC2_permissive | 23322     | RPGRIP1L     |
| SZ_Risk | PGC2_permissive | 79068     | FTO          |
| SZ_Risk | PGC2_permissive | 51460     | SFMBT1       |
| SZ_Risk | PGC2_permissive | 407051    | MIR9-3       |
| SZ_Risk | PGC2_permissive | 375057    | C1orf95      |
| SZ_Risk | PGC2_permissive | 100526767 | RNF103-CHMP3 |
| SZ_Risk | PGC2_permissive | 64795     | RMND5A       |
| SZ_Risk | PGC2_permissive | 133022    | TRAM1L1      |
| SZ_Risk | PGC2_permissive | 25902     | MTHFD1L      |
| SZ_Risk | PGC2_permissive | 51043     | ZBTB7B       |
| SZ_Risk | PGC2_permissive | 127579    | DCST2        |
| SZ_Risk | PGC2_permissive | 149095    | DCST1        |
| SZ_Risk | PGC2_permissive | 7844      | RNF103       |
| SZ_Risk | PGC2_permissive | 925       | CD8A         |
| SZ_Risk | PGC2_permissive | 162494    | RHBDL3       |
| SZ_Risk | PGC2_permissive | 64149     | C17orf75     |
| SZ_Risk | PGC2_permissive | 693217    | MIR632       |
| SZ_Risk | PGC2_permissive | 7756      | ZNF207       |
| SZ_Risk | PGC2_permissive | 5717      | PSMD11       |
| SZ_Risk | PGC2_permissive | 8851      | CDK5R1       |
| SZ_Risk | PGC2_permissive | 4642      | MYO1D        |
| SZ_Risk | PGC2_permissive | 10100     | TSPAN2       |
| SZ_Risk | PGC2_permissive | 64582     | GPR135       |
| SZ_Risk | PGC2_permissive | 112849    | L3HYPDH      |
| SZ_Risk | PGC2_permissive | 51528     | JKAMP        |
| SZ_Risk | PGC2_permissive | 729665    | CCDC175      |
| SZ_Risk | PGC2_permissive | 100847084 | MIR548AP     |
| SZ_Risk | PGC2_permissive | 343450    | KCNT2        |
| SZ_Risk | PGC2_permissive | 7150      | TOP1         |
| SZ_Risk | PGC2_permissive | 5335      | PLCG1        |
| SZ_Risk | PGC2_permissive | 23051     | ZHX3         |
| SZ_Risk | PGC2_permissive | 64900     | LPIN3        |
| SZ_Risk | PGC2_permissive | 9148      | NEURL        |
| SZ_Risk | PGC2_permissive | 4481      | MSR1         |

|         |                 |           |              |
|---------|-----------------|-----------|--------------|
| SZ_Risk | PGC2_permissive | 79570     | NKAIN1       |
| SZ_Risk | PGC2_permissive | 9410      | SNRNP40      |
| SZ_Risk | PGC2_permissive | 51538     | ZCCHC17      |
| SZ_Risk | PGC2_permissive | 2170      | FABP3        |
| SZ_Risk | PGC2_permissive | 347735    | SERINC2      |
| SZ_Risk | PGC2_permissive | 7531      | YWHAE        |
| SZ_Risk | PGC2_permissive | 94134     | ARHGAP12     |
| SZ_Risk | PGC2_permissive | 3799      | KIF5B        |
| SZ_Risk | PGC2_permissive | 406917    | MIR129-1     |
| SZ_Risk | PGC2_permissive | 3952      | LEP          |
| SZ_Risk | PGC2_permissive | 266722    | HS6ST3       |
| SZ_Risk | PGC2_permissive | 3191      | HNRNPL       |
| SZ_Risk | PGC2_permissive | 126432    | RINL         |
| SZ_Risk | PGC2_permissive | 9856      | KIAA0319     |
| SZ_Risk | PGC2_permissive | 51567     | TDP2         |
| SZ_Risk | PGC2_permissive | 55856     | ACOT13       |
| SZ_Risk | PGC2_permissive | 81688     | C6orf62      |
| SZ_Risk | PGC2_permissive | 55561     | CDC42BPG     |
| SZ_Risk | PGC2_permissive | 10938     | EHD1         |
| SZ_Risk | PGC2_permissive | 406967    | MIR192       |
| SZ_Risk | PGC2_permissive | 406970    | MIR194-2     |
| SZ_Risk | PGC2_permissive | 23130     | ATG2A        |
| SZ_Risk | PGC2_permissive | 116071    | BATF2        |
| SZ_Risk | PGC2_permissive | 402       | ARL2         |
| SZ_Risk | PGC2_permissive | 100528018 | ARL2-SNX15   |
| SZ_Risk | PGC2_permissive | 29907     | SNX15        |
| SZ_Risk | PGC2_permissive | 64062     | RBM26        |
| SZ_Risk | PGC2_permissive | 100505538 | RBM26-AS1    |
| SZ_Risk | PGC2_permissive | 100874208 | NDFIP2-AS1   |
| SZ_Risk | PGC2_permissive | 54602     | NDFIP2       |
| SZ_Risk | PGC2_permissive | 6249      | CLIP1        |
| SZ_Risk | PGC2_permissive | 100507066 | LOC100507066 |
| SZ_Risk | PGC2_permissive | 55596     | ZCCHC8       |
| SZ_Risk | PGC2_permissive | 5287      | PIK3C2B      |
| SZ_Risk | PGC2_permissive | 4194      | MDM4         |
| SZ_Risk | PGC2_permissive | 10446     | LRRN2        |
| SZ_Risk | PGC2_permissive | 1838      | DTNB         |
| SZ_Risk | PGC2_permissive | 474       | ATOH1        |
| SZ_Risk | PGC2_permissive | 283446    | MYO1H        |
| SZ_Risk | PGC2_permissive | 83892     | KCTD10       |
| SZ_Risk | PGC2_permissive | 89910     | UBE3B        |
| SZ_Risk | PGC2_permissive | 326625    | MMAB         |
| SZ_Risk | PGC2_permissive | 4598      | MVK          |
| SZ_Risk | PGC2_permissive | 196513    | DCP1B        |
| SZ_Risk | PGC2_permissive | 158293    | FAM120AOS    |
| SZ_Risk | PGC2_permissive | 23196     | FAM120A      |
| SZ_Risk | PGC2_permissive | 5253      | PHF2         |
| SZ_Risk | PGC2_permissive | 421       | ARVCF        |
| SZ_Risk | PGC2_permissive | 406961    | MIR185       |
| SZ_Risk | PGC2_permissive | 54487     | DGCR8        |
| SZ_Risk | PGC2_permissive | 100500860 | MIR3618      |
| SZ_Risk | PGC2_permissive | 100302197 | MIR1306      |
| SZ_Risk | PGC2_permissive | 27037     | TRMT2A       |
| SZ_Risk | PGC2_permissive | 5902      | RANBP1       |
| SZ_Risk | PGC2_permissive | 29801     | ZDHHC8       |
| SZ_Risk | PGC2_permissive | 388849    | LOC388849    |
| SZ_Risk | PGC2_permissive | 729987    | LOC729987    |
| SZ_Risk | PGC2_permissive | 51065     | RPS27L       |

|         |                 |           |              |
|---------|-----------------|-----------|--------------|
| SZ_Risk | PGC2_permissive | 51762     | RAB8B        |
| SZ_Risk | PGC2_permissive | 100506710 | LOC100506710 |
| SZ_Risk | PGC2_permissive | 84186     | ZCCHC7       |
| SZ_Risk | PGC2_permissive | 344022    | NOTO         |
| SZ_Risk | PGC2_permissive | 10322     | SMYD5        |
| SZ_Risk | PGC2_permissive | 84279     | PRADC1       |
| SZ_Risk | PGC2_permissive | 10574     | CCT7         |
| SZ_Risk | PGC2_permissive | 9764      | KIAA0513     |
| SZ_Risk | PGC2_permissive | 339145    | FAM92B       |
| SZ_Risk | PGC2_permissive | 1630      | DCC          |
| SZ_Risk | PGC2_permissive | 57172     | CAMK1G       |
| SZ_Risk | PGC2_permissive | 6602      | SMARCD1      |
| SZ_Risk | PGC2_permissive | 2819      | GPD1         |
| SZ_Risk | PGC2_permissive | 84987     | COX14        |
| SZ_Risk | PGC2_permissive | 91012     | CERS5        |
| SZ_Risk | PGC2_permissive | 51474     | LIMA1        |
| SZ_Risk | PGC2_permissive | 100302220 | MIR1293      |
| SZ_Risk | PGC2_permissive | 121006    | FAM186A      |
| SZ_Risk | PGC2_permissive | 113251    | LARP4        |
| SZ_Risk | PGC2_permissive | 57609     | DIP2B        |
| SZ_Risk | PGC2_permissive | 6016      | RIT1         |
| SZ_Risk | PGC2_permissive | 22889     | KIAA0907     |
| SZ_Risk | PGC2_permissive | 677823    | SNORA42      |
| SZ_Risk | PGC2_permissive | 677771    | SCARNA4      |
| SZ_Risk | PGC2_permissive | 4126      | MANBA        |
| SZ_Risk | PGC2_permissive | 7323      | UBE2D3       |
| SZ_Risk | PGC2_permissive | 493856    | CISD2        |
| SZ_Risk | PGC2_permissive | 150159    | SLC9B1       |
| SZ_Risk | PGC2_permissive | 133308    | SLC9B2       |
| SZ_Risk | PGC2_permissive | 222255    | ATXN7L1      |
| SZ_Risk | PGC2_permissive | 26137     | ZBTB20       |
| SZ_Risk | PGC2_permissive | 116154    | PHACTR3      |
| SZ_Risk | PGC2_permissive | 387885    | CCDC42B      |
| SZ_Risk | PGC2_permissive | 79039     | DDX54        |
| SZ_Risk | PGC2_permissive | 84934     | C12orf52     |
| SZ_Risk | PGC2_permissive | 115811    | IQCD         |
| SZ_Risk | PGC2_permissive | 53373     | TPCN1        |
| SZ_Risk | PGC2_permissive | 9071      | CLDN10       |
| SZ_Risk | PGC2_permissive | 100874194 | CLDN10-AS1   |
| SZ_Risk | PGC2_permissive | 54629     | FAM63B       |
| SZ_Risk | PGC2_permissive | 79811     | SLTM         |
| SZ_Risk | PGC2_permissive | 85439     | STON2        |
| SZ_Risk | PGC2_permissive | 403341    | ZBTB34       |
| SZ_Risk | PGC2_permissive | 9649      | RALGPS1      |
| SZ_Risk | PGC2_permissive | 23452     | ANGPTL2      |
| SZ_Risk | PGC2_permissive | 22891     | ZNF365       |
| SZ_Risk | PGC2_permissive | 64843     | ISL2         |
| SZ_Risk | PGC2_permissive | 49855     | SCAPER       |
| SZ_Risk | PGC2_permissive | 63978     | PRDM14       |
| SZ_Risk | PGC2_permissive | 80727     | TTYH3        |
| SZ_Risk | PGC2_permissive | 155185    | AMZ1         |
| SZ_Risk | PGC2_permissive | 11252     | PACSIN2      |
| SZ_Risk | PGC2_permissive | 25809     | TLL1         |
| SZ_Risk | PGC2_permissive | 442319    | ZNF727       |
| SZ_Risk | PGC2_permissive | 463       | ZFH3         |
| SZ_Risk | PGC2_permissive | 148479    | PHF13        |
| SZ_Risk | PGC2_permissive | 90326     | THAP3        |
| SZ_Risk | PGC2_permissive | 55735     | DNAJC11      |



|         |                 |           |           |
|---------|-----------------|-----------|-----------|
| SZ_Risk | PGC2_permissive | 5101      | PCDH9     |
| SZ_Risk | PGC2_permissive | 100874086 | PCDH9-AS3 |
| SZ_Risk | scz-denovo-lof  | 122773    | KLHDC1    |
| SZ_Risk | scz-denovo-lof  | 1770      | DNAH9     |
| SZ_Risk | scz-denovo-lof  | 3320      | HSP90AA1  |
| SZ_Risk | scz-denovo-lof  | 23648     | SSBP3     |
| SZ_Risk | scz-denovo-lof  | 9213      | XPR1      |
| SZ_Risk | scz-denovo-lof  | 23331     | TTC28     |
| SZ_Risk | scz-denovo-lof  | 84775     | ZNF607    |
| SZ_Risk | scz-denovo-lof  | 90313     | TP53I13   |
| SZ_Risk | scz-denovo-lof  | 9588      | PRDX6     |
| SZ_Risk | scz-denovo-lof  | 6326      | SCN2A     |
| SZ_Risk | scz-denovo-lof  | 84166     | NLRC5     |
| SZ_Risk | scz-denovo-lof  | 92667     | MGME1     |
| SZ_Risk | scz-denovo-lof  | 9874      | TLK1      |
| SZ_Risk | scz-denovo-lof  | 259173    | ALS2CL    |
| SZ_Risk | scz-denovo-lof  | 4035      | LRP1      |
| SZ_Risk | scz-denovo-lof  | 23259     | DDHD2     |
| SZ_Risk | scz-denovo-lof  | 1180      | CLCN1     |
| SZ_Risk | scz-denovo-lof  | 405753    | DUOXA2    |
| SZ_Risk | scz-denovo-lof  | 6935      | ZEB1      |
| SZ_Risk | scz-denovo-lof  | 51533     | PHF7      |
| SZ_Risk | scz-denovo-lof  | 90952     | ESAM      |
| SZ_Risk | scz-denovo-lof  | 55269     | PSPC1     |
| SZ_Risk | scz-denovo-lof  | 91746     | YTHDC1    |
| SZ_Risk | scz-denovo-lof  | 4674      | NAP1L2    |
| SZ_Risk | scz-denovo-lof  | 10002     | NR2E3     |
| SZ_Risk | scz-denovo-lof  | 339451    | KLHL17    |
| SZ_Risk | scz-denovo-lof  | 55628     | ZNF407    |
| SZ_Risk | scz-denovo-lof  | 3008      | HIST1H1E  |
| SZ_Risk | scz-denovo-lof  | 1969      | EPHA2     |
| SZ_Risk | scz-denovo-lof  | 4343      | MOV10     |
| SZ_Risk | scz-denovo-lof  | 56244     | BTNL2     |
| SZ_Risk | scz-denovo-lof  | 25921     | ZDHHC5    |
| SZ_Risk | scz-denovo-lof  | 84705     | GTPBP3    |
| SZ_Risk | scz-denovo-lof  | 25836     | NIPBL     |
| SZ_Risk | scz-denovo-lof  | 6884      | TAF13     |
| SZ_Risk | scz-denovo-lof  | 3908      | LAMA2     |
| SZ_Risk | scz-denovo-lof  | 7862      | BRPF1     |
| SZ_Risk | scz-denovo-lof  | 23334     | SZT2      |
| SZ_Risk | scz-denovo-lof  | 586       | BCAT1     |
| SZ_Risk | scz-denovo-lof  | 3312      | HSPA8     |
| SZ_Risk | scz-denovo-lof  | 5067      | CNTN3     |
| SZ_Risk | scz-denovo-lof  | 147657    | ZNF480    |
| SZ_Risk | scz-denovo-lof  | 23126     | POGZ      |
| SZ_Risk | scz-denovo-lof  | 9140      | ATG12     |
| SZ_Risk | scz-denovo-lof  | 221955    | DAGLB     |
| SZ_Risk | scz-denovo-lof  | 8831      | SYNGAP1   |
| SZ_Risk | scz-denovo-lof  | 59269     | HIVEP3    |
| SZ_Risk | scz-denovo-lof  | 51517     | NCKIPSD   |
| SZ_Risk | scz-denovo-lof  | 10659     | CELF2     |
| SZ_Risk | scz-denovo-lof  | 1740      | DLG2      |
| SZ_Risk | scz-denovo-lof  | 1806      | DPYD      |
| SZ_Risk | scz-denovo-lof  | 9816      | URB2      |
| SZ_Risk | scz-denovo-lof  | 84629     | TNRC18    |
| SZ_Risk | scz-denovo-lof  | 4282      | MIF       |
| SZ_Risk | scz-denovo-lof  | 4288      | MKI67     |
| SZ_Risk | scz-denovo-lof  | 8242      | KDM5C     |

|         |                   |        |           |
|---------|-------------------|--------|-----------|
| SZ_Risk | scz-denovo-lof    | 57185  | NIPAL3    |
| SZ_Risk | scz-denovo-lof    | 11260  | XPOT      |
| SZ_Risk | scz-denovo-lof    | 2532   | DARC      |
| SZ_Risk | scz-denovo-lof    | 5916   | RARG      |
| SZ_Risk | scz-denovo-lof    | 5287   | PIK3C2B   |
| SZ_Risk | scz-denovo-lof    | 9821   | RB1CC1    |
| SZ_Risk | scz-denovo-lof    | 57787  | MARK4     |
| SZ_Risk | scz-denovo-lof    | 199953 | TMEM201   |
| SZ_Risk | scz-denovo-lof    | 23376  | UFL1      |
| SZ_Risk | scz-denovo-lof    | 50624  | CUZD1     |
| SZ_Risk | scz-denovo-lof    | 6453   | ITSN1     |
| SZ_Risk | scz-denovo-lof    | 3836   | KPNA1     |
| SZ_Risk | scz-denovo-lof    | 10771  | ZMYND11   |
| SZ_Risk | scz-denovo-lof    | 339829 | CCDC39    |
| SZ_Risk | scz-denovo-lof    | 7840   | ALMS1     |
| SZ_Risk | scz-denovo-lof    | 23266  | LPHN2     |
| SZ_Risk | scz-denovo-lof    | 344838 | PAQR9     |
| SZ_Risk | scz-denovo-lof    | 1833   | EPYC      |
| SZ_Risk | scz-denovo-lof    | 56134  | PCDHAC2   |
| SZ_Risk | scz-denovo-lof    | 50944  | SHANK1    |
| SZ_Risk | scz-denovo-lof    | 55620  | STAP2     |
| SZ_Risk | scz-denovo-lof    | 7200   | TRH       |
| SZ_Risk | scz-denovo-lof    | 83593  | RASSF5    |
| SZ_Risk | scz-denovo-lof    | 25962  | KIAA1429  |
| SZ_Risk | scz-denovo-lof    | 54832  | VPS13C    |
| SZ_Risk | scz-denovo-lof    | 6601   | SMARCC2   |
| SZ_Risk | scz-denovo-lof    | 4703   | NEB       |
| SZ_Risk | scz-denovo-lof    | 7916   | PRRC2A    |
| SZ_Risk | scz-denovo-lof    | 53371  | NUP54     |
| SZ_Risk | scz-denovo-lof    | 57644  | MYH7B     |
| SZ_Risk | scz-denovo-nonsyn | 170960 | ZNF721    |
| SZ_Risk | scz-denovo-nonsyn | 7201   | TRHR      |
| SZ_Risk | scz-denovo-nonsyn | 8658   | TNKS      |
| SZ_Risk | scz-denovo-nonsyn | 23566  | LPAR3     |
| SZ_Risk | scz-denovo-nonsyn | 83879  | CDCA7     |
| SZ_Risk | scz-denovo-nonsyn | 220965 | FAM13C    |
| SZ_Risk | scz-denovo-nonsyn | 166378 | SPATA5    |
| SZ_Risk | scz-denovo-nonsyn | 122525 | C14orf28  |
| SZ_Risk | scz-denovo-nonsyn | 25793  | FBXO7     |
| SZ_Risk | scz-denovo-nonsyn | 90952  | ESAM      |
| SZ_Risk | scz-denovo-nonsyn | 50831  | TAS2R3    |
| SZ_Risk | scz-denovo-nonsyn | 3645   | INSRR     |
| SZ_Risk | scz-denovo-nonsyn | 140453 | MUC17     |
| SZ_Risk | scz-denovo-nonsyn | 929    | CD14      |
| SZ_Risk | scz-denovo-nonsyn | 8969   | HIST1H2AG |
| SZ_Risk | scz-denovo-nonsyn | 7011   | TEP1      |
| SZ_Risk | scz-denovo-nonsyn | 376940 | ZC3H6     |
| SZ_Risk | scz-denovo-nonsyn | 80184  | CEP290    |
| SZ_Risk | scz-denovo-nonsyn | 1775   | DNASE1L2  |
| SZ_Risk | scz-denovo-nonsyn | 727897 | MUC5B     |
| SZ_Risk | scz-denovo-nonsyn | 8503   | PIK3R3    |
| SZ_Risk | scz-denovo-nonsyn | 259173 | ALS2CL    |
| SZ_Risk | scz-denovo-nonsyn | 10880  | ACTL7B    |
| SZ_Risk | scz-denovo-nonsyn | 23376  | UFL1      |
| SZ_Risk | scz-denovo-nonsyn | 7275   | TUB       |
| SZ_Risk | scz-denovo-nonsyn | 1756   | DMD       |
| SZ_Risk | scz-denovo-nonsyn | 3356   | HTR2A     |
| SZ_Risk | scz-denovo-nonsyn | 338657 | CCDC84    |

|         |                   |        |           |
|---------|-------------------|--------|-----------|
| SZ_Risk | scz-denovo-nonsyn | 116369 | SLC26A8   |
| SZ_Risk | scz-denovo-nonsyn | 57003  | CCDC47    |
| SZ_Risk | scz-denovo-nonsyn | 10771  | ZMYND11   |
| SZ_Risk | scz-denovo-nonsyn | 51517  | NCKIPSD   |
| SZ_Risk | scz-denovo-nonsyn | 5991   | RFX3      |
| SZ_Risk | scz-denovo-nonsyn | 22827  | PUF60     |
| SZ_Risk | scz-denovo-nonsyn | 85315  | PAQR8     |
| SZ_Risk | scz-denovo-nonsyn | 344838 | PAQR9     |
| SZ_Risk | scz-denovo-nonsyn | 200845 | KCTD6     |
| SZ_Risk | scz-denovo-nonsyn | 5140   | PDE3B     |
| SZ_Risk | scz-denovo-nonsyn | 8294   | HIST1H4I  |
| SZ_Risk | scz-denovo-nonsyn | 3938   | LCT       |
| SZ_Risk | scz-denovo-nonsyn | 389384 | C6orf222  |
| SZ_Risk | scz-denovo-nonsyn | 779    | CACNA1S   |
| SZ_Risk | scz-denovo-nonsyn | 205717 | KIAA2018  |
| SZ_Risk | scz-denovo-nonsyn | 7534   | YWHAZ     |
| SZ_Risk | scz-denovo-nonsyn | 84441  | MAML2     |
| SZ_Risk | scz-denovo-nonsyn | 3632   | INPP5A    |
| SZ_Risk | scz-denovo-nonsyn | 84674  | CARD6     |
| SZ_Risk | scz-denovo-nonsyn | 23339  | VPS39     |
| SZ_Risk | scz-denovo-nonsyn | 8295   | TRRAP     |
| SZ_Risk | scz-denovo-nonsyn | 284756 | C20orf197 |
| SZ_Risk | scz-denovo-nonsyn | 284217 | LAMA1     |
| SZ_Risk | scz-denovo-nonsyn | 3312   | HSPA8     |
| SZ_Risk | scz-denovo-nonsyn | 3908   | LAMA2     |
| SZ_Risk | scz-denovo-nonsyn | 91949  | COG7      |
| SZ_Risk | scz-denovo-nonsyn | 3910   | LAMA4     |
| SZ_Risk | scz-denovo-nonsyn | 57475  | PLEKHH1   |
| SZ_Risk | scz-denovo-nonsyn | 57492  | ARID1B    |
| SZ_Risk | scz-denovo-nonsyn | 84678  | KDM2B     |
| SZ_Risk | scz-denovo-nonsyn | 9368   | SLC9A3R1  |
| SZ_Risk | scz-denovo-nonsyn | 5670   | PSG2      |
| SZ_Risk | scz-denovo-nonsyn | 283848 | CES4A     |
| SZ_Risk | scz-denovo-nonsyn | 26953  | RANBP6    |
| SZ_Risk | scz-denovo-nonsyn | 7268   | TTC4      |
| SZ_Risk | scz-denovo-nonsyn | 121457 | IKBIP     |
| SZ_Risk | scz-denovo-nonsyn | 84447  | SYVN1     |
| SZ_Risk | scz-denovo-nonsyn | 59269  | HIVEP3    |
| SZ_Risk | scz-denovo-nonsyn | 56889  | TM9SF3    |
| SZ_Risk | scz-denovo-nonsyn | 90627  | STARD13   |
| SZ_Risk | scz-denovo-nonsyn | 3667   | IRS1      |
| SZ_Risk | scz-denovo-nonsyn | 2015   | EMR1      |
| SZ_Risk | scz-denovo-nonsyn | 84658  | EMR3      |
| SZ_Risk | scz-denovo-nonsyn | 54801  | HAUS6     |
| SZ_Risk | scz-denovo-nonsyn | 54209  | TREM2     |
| SZ_Risk | scz-denovo-nonsyn | 93323  | HAUS8     |
| SZ_Risk | scz-denovo-nonsyn | 63943  | FKBPL     |
| SZ_Risk | scz-denovo-nonsyn | 4343   | MOV10     |
| SZ_Risk | scz-denovo-nonsyn | 2694   | GIF       |
| SZ_Risk | scz-denovo-nonsyn | 51332  | SPTBN5    |
| SZ_Risk | scz-denovo-nonsyn | 4288   | MKI67     |
| SZ_Risk | scz-denovo-nonsyn | 87     | ACTN1     |
| SZ_Risk | scz-denovo-nonsyn | 57533  | TBC1D14   |
| SZ_Risk | scz-denovo-nonsyn | 339501 | PRSS38    |
| SZ_Risk | scz-denovo-nonsyn | 84166  | NLRC5     |
| SZ_Risk | scz-denovo-nonsyn | 23274  | CLEC16A   |
| SZ_Risk | scz-denovo-nonsyn | 7692   | ZNF133    |
| SZ_Risk | scz-denovo-nonsyn | 219537 | SMTNL1    |

|         |                   |        |          |
|---------|-------------------|--------|----------|
| SZ_Risk | scz-denovo-nonsyn | 9805   | SCRN1    |
| SZ_Risk | scz-denovo-nonsyn | 4926   | NUMA1    |
| SZ_Risk | scz-denovo-nonsyn | 58525  | WIZ      |
| SZ_Risk | scz-denovo-nonsyn | 50624  | CUZD1    |
| SZ_Risk | scz-denovo-nonsyn | 23334  | SZT2     |
| SZ_Risk | scz-denovo-nonsyn | 131177 | FAM3D    |
| SZ_Risk | scz-denovo-nonsyn | 79036  | KXD1     |
| SZ_Risk | scz-denovo-nonsyn | 5916   | RARG     |
| SZ_Risk | scz-denovo-nonsyn | 8204   | NRIP1    |
| SZ_Risk | scz-denovo-nonsyn | 8434   | RECK     |
| SZ_Risk | scz-denovo-nonsyn | 25921  | ZDHHC5   |
| SZ_Risk | scz-denovo-nonsyn | 29904  | EEF2K    |
| SZ_Risk | scz-denovo-nonsyn | 214    | ALCAM    |
| SZ_Risk | scz-denovo-nonsyn | 84647  | PLA2G12B |
| SZ_Risk | scz-denovo-nonsyn | 48     | ACO1     |
| SZ_Risk | scz-denovo-nonsyn | 2033   | EP300    |
| SZ_Risk | scz-denovo-nonsyn | 29115  | SAP30BP  |
| SZ_Risk | scz-denovo-nonsyn | 54932  | EXD3     |
| SZ_Risk | scz-denovo-nonsyn | 643414 | LIPK     |
| SZ_Risk | scz-denovo-nonsyn | 4931   | NVL      |
| SZ_Risk | scz-denovo-nonsyn | 83449  | PMFBP1   |
| SZ_Risk | scz-denovo-nonsyn | 641372 | ACOT6    |
| SZ_Risk | scz-denovo-nonsyn | 56479  | KCNQ5    |
| SZ_Risk | scz-denovo-nonsyn | 84162  | KIAA1109 |
| SZ_Risk | scz-denovo-nonsyn | 10142  | AKAP9    |
| SZ_Risk | scz-denovo-nonsyn | 2185   | PTK2B    |
| SZ_Risk | scz-denovo-nonsyn | 9343   | EFTUD2   |
| SZ_Risk | scz-denovo-nonsyn | 1826   | DSCAM    |
| SZ_Risk | scz-denovo-nonsyn | 55717  | WDR11    |
| SZ_Risk | scz-denovo-nonsyn | 54659  | UGT1A3   |
| SZ_Risk | scz-denovo-nonsyn | 8943   | AP3D1    |
| SZ_Risk | scz-denovo-nonsyn | 9588   | PRDX6    |
| SZ_Risk | scz-denovo-nonsyn | 7402   | UTRN     |
| SZ_Risk | scz-denovo-nonsyn | 53371  | NUP54    |
| SZ_Risk | scz-denovo-nonsyn | 726    | CAPN5    |
| SZ_Risk | scz-denovo-nonsyn | 9829   | DNAJC6   |
| SZ_Risk | scz-denovo-nonsyn | 10753  | CAPN9    |
| SZ_Risk | scz-denovo-nonsyn | 25831  | HECTD1   |
| SZ_Risk | scz-denovo-nonsyn | 23076  | RRP1B    |
| SZ_Risk | scz-denovo-nonsyn | 6474   | SHOX2    |
| SZ_Risk | scz-denovo-nonsyn | 8940   | TOP3B    |
| SZ_Risk | scz-denovo-nonsyn | 9967   | THRAP3   |
| SZ_Risk | scz-denovo-nonsyn | 57448  | BIRC6    |
| SZ_Risk | scz-denovo-nonsyn | 85301  | COL27A1  |
| SZ_Risk | scz-denovo-nonsyn | 5067   | CNTN3    |
| SZ_Risk | scz-denovo-nonsyn | 57020  | C16orf62 |
| SZ_Risk | scz-denovo-nonsyn | 2215   | FCGR3B   |
| SZ_Risk | scz-denovo-nonsyn | 255275 | MYADML2  |
| SZ_Risk | scz-denovo-nonsyn | 94239  | H2AFV    |
| SZ_Risk | scz-denovo-nonsyn | 85461  | TANC1    |
| SZ_Risk | scz-denovo-nonsyn | 26115  | TANC2    |
| SZ_Risk | scz-denovo-nonsyn | 64744  | SMAP2    |
| SZ_Risk | scz-denovo-nonsyn | 51433  | ANAPC5   |
| SZ_Risk | scz-denovo-nonsyn | 81930  | KIF18A   |
| SZ_Risk | scz-denovo-nonsyn | 6884   | TAF13    |
| SZ_Risk | scz-denovo-nonsyn | 9667   | SAFB2    |
| SZ_Risk | scz-denovo-nonsyn | 4092   | SMAD7    |
| SZ_Risk | scz-denovo-nonsyn | 2100   | ESR2     |

|         |                   |        |           |
|---------|-------------------|--------|-----------|
| SZ_Risk | scz-denovo-nonsyn | 3866   | KRT15     |
| SZ_Risk | scz-denovo-nonsyn | 727936 | GXYLT2    |
| SZ_Risk | scz-denovo-nonsyn | 821    | CANX      |
| SZ_Risk | scz-denovo-nonsyn | 4282   | MIF       |
| SZ_Risk | scz-denovo-nonsyn | 9013   | TAF1C     |
| SZ_Risk | scz-denovo-nonsyn | 53405  | CLIC5     |
| SZ_Risk | scz-denovo-nonsyn | 284695 | ZNF326    |
| SZ_Risk | scz-denovo-nonsyn | 6915   | TBXA2R    |
| SZ_Risk | scz-denovo-nonsyn | 26509  | MYOF      |
| SZ_Risk | scz-denovo-nonsyn | 211    | ALAS1     |
| SZ_Risk | scz-denovo-nonsyn | 147920 | IGFL2     |
| SZ_Risk | scz-denovo-nonsyn | 9821   | RB1CC1    |
| SZ_Risk | scz-denovo-nonsyn | 7057   | THBS1     |
| SZ_Risk | scz-denovo-nonsyn | 57787  | MARK4     |
| SZ_Risk | scz-denovo-nonsyn | 26960  | NBEA      |
| SZ_Risk | scz-denovo-nonsyn | 54084  | TSPEAR    |
| SZ_Risk | scz-denovo-nonsyn | 10274  | STAG1     |
| SZ_Risk | scz-denovo-nonsyn | 51574  | LARP7     |
| SZ_Risk | scz-denovo-nonsyn | 8344   | HIST1H2BE |
| SZ_Risk | scz-denovo-nonsyn | 342667 | STAC2     |
| SZ_Risk | scz-denovo-nonsyn | 79672  | FN3KRP    |
| SZ_Risk | scz-denovo-nonsyn | 27258  | LSM3      |
| SZ_Risk | scz-denovo-nonsyn | 57644  | MYH7B     |
| SZ_Risk | scz-denovo-nonsyn | 51162  | EGFL7     |
| SZ_Risk | scz-denovo-nonsyn | 1496   | CTNNA2    |
| SZ_Risk | scz-denovo-nonsyn | 51533  | PHF7      |
| SZ_Risk | scz-denovo-nonsyn | 9947   | MAGEC1    |
| SZ_Risk | scz-denovo-nonsyn | 92667  | MGME1     |
| SZ_Risk | scz-denovo-nonsyn | 56890  | MDM1      |
| SZ_Risk | scz-denovo-nonsyn | 60493  | FASTKD5   |
| SZ_Risk | scz-denovo-nonsyn | 64174  | DPEP2     |
| SZ_Risk | scz-denovo-nonsyn | 10845  | CLPX      |
| SZ_Risk | scz-denovo-nonsyn | 55206  | SBNO1     |
| SZ_Risk | scz-denovo-nonsyn | 5291   | PIK3CB    |
| SZ_Risk | scz-denovo-nonsyn | 7200   | TRH       |
| SZ_Risk | scz-denovo-nonsyn | 22856  | CHSY1     |
| SZ_Risk | scz-denovo-nonsyn | 10342  | TFG       |
| SZ_Risk | scz-denovo-nonsyn | 5371   | PML       |
| SZ_Risk | scz-denovo-nonsyn | 3008   | HIST1H1E  |
| SZ_Risk | scz-denovo-nonsyn | 22872  | SEC31A    |
| SZ_Risk | scz-denovo-nonsyn | 84629  | TNRC18    |
| SZ_Risk | scz-denovo-nonsyn | 285367 | RPUSD3    |
| SZ_Risk | scz-denovo-nonsyn | 56244  | BTNL2     |
| SZ_Risk | scz-denovo-nonsyn | 3993   | LLGL2     |
| SZ_Risk | scz-denovo-nonsyn | 284546 | C1orf185  |
| SZ_Risk | scz-denovo-nonsyn | 5724   | PTAFR     |
| SZ_Risk | scz-denovo-nonsyn | 9267   | CYTH1     |
| SZ_Risk | scz-denovo-nonsyn | 85464  | SSH2      |
| SZ_Risk | scz-denovo-nonsyn | 7798   | LUZP1     |
| SZ_Risk | scz-denovo-nonsyn | 221458 | KIF6      |
| SZ_Risk | scz-denovo-nonsyn | 246    | ALOX15    |
| SZ_Risk | scz-denovo-nonsyn | 10143  | CLEC3A    |
| SZ_Risk | scz-denovo-nonsyn | 4035   | LRP1      |
| SZ_Risk | scz-denovo-nonsyn | 7098   | TLR3      |
| SZ_Risk | scz-denovo-nonsyn | 1739   | DLG1      |
| SZ_Risk | scz-denovo-nonsyn | 7100   | TLR5      |
| SZ_Risk | scz-denovo-nonsyn | 1740   | DLG2      |
| SZ_Risk | scz-denovo-nonsyn | 4038   | LRP4      |

|         |                   |        |          |
|---------|-------------------|--------|----------|
| SZ_Risk | scz-denovo-nonsyn | 51284  | TLR7     |
| SZ_Risk | scz-denovo-nonsyn | 22874  | PLEKHA6  |
| SZ_Risk | scz-denovo-nonsyn | 5361   | PLXNA1   |
| SZ_Risk | scz-denovo-nonsyn | 23345  | SYNE1    |
| SZ_Risk | scz-denovo-nonsyn | 23012  | STK38L   |
| SZ_Risk | scz-denovo-nonsyn | 27177  | IL36B    |
| SZ_Risk | scz-denovo-nonsyn | 64137  | ABCG4    |
| SZ_Risk | scz-denovo-nonsyn | 23145  | SSPO     |
| SZ_Risk | scz-denovo-nonsyn | 7274   | TTPA     |
| SZ_Risk | scz-denovo-nonsyn | 201595 | STT3B    |
| SZ_Risk | scz-denovo-nonsyn | 1464   | CSPG4    |
| SZ_Risk | scz-denovo-nonsyn | 23065  | EMC1     |
| SZ_Risk | scz-denovo-nonsyn | 23152  | CIC      |
| SZ_Risk | scz-denovo-nonsyn | 8720   | MBTPS1   |
| SZ_Risk | scz-denovo-nonsyn | 1983   | EIF5     |
| SZ_Risk | scz-denovo-nonsyn | 22861  | NLRP1    |
| SZ_Risk | scz-denovo-nonsyn | 55536  | CDCA7L   |
| SZ_Risk | scz-denovo-nonsyn | 83856  | FSD1L    |
| SZ_Risk | scz-denovo-nonsyn | 7486   | WRN      |
| SZ_Risk | scz-denovo-nonsyn | 90233  | ZNF551   |
| SZ_Risk | scz-denovo-nonsyn | 2775   | GNAO1    |
| SZ_Risk | scz-denovo-nonsyn | 55075  | UACA     |
| SZ_Risk | scz-denovo-nonsyn | 338821 | SLCO1B7  |
| SZ_Risk | scz-denovo-nonsyn | 3720   | JARID2   |
| SZ_Risk | scz-denovo-nonsyn | 11113  | CIT      |
| SZ_Risk | scz-denovo-nonsyn | 60482  | SLC5A7   |
| SZ_Risk | scz-denovo-nonsyn | 64753  | CCDC136  |
| SZ_Risk | scz-denovo-nonsyn | 153090 | DAB2IP   |
| SZ_Risk | scz-denovo-nonsyn | 339230 | CCDC137  |
| SZ_Risk | scz-denovo-nonsyn | 23126  | POGZ     |
| SZ_Risk | scz-denovo-nonsyn | 3455   | IFNAR2   |
| SZ_Risk | scz-denovo-nonsyn | 129607 | CMPK2    |
| SZ_Risk | scz-denovo-nonsyn | 6601   | SMARCC2  |
| SZ_Risk | scz-denovo-nonsyn | 814    | CAMK4    |
| SZ_Risk | scz-denovo-nonsyn | 57332  | CBX8     |
| SZ_Risk | scz-denovo-nonsyn | 10585  | POMT1    |
| SZ_Risk | scz-denovo-nonsyn | 63967  | CLSPN    |
| SZ_Risk | scz-denovo-nonsyn | 5649   | RELN     |
| SZ_Risk | scz-denovo-nonsyn | 6568   | SLC17A1  |
| SZ_Risk | scz-denovo-nonsyn | 9213   | XPR1     |
| SZ_Risk | scz-denovo-nonsyn | 6326   | SCN2A    |
| SZ_Risk | scz-denovo-nonsyn | 84343  | HPS3     |
| SZ_Risk | scz-denovo-nonsyn | 122773 | KLHDC1   |
| SZ_Risk | scz-denovo-nonsyn | 259232 | NALCN    |
| SZ_Risk | scz-denovo-nonsyn | 283316 | CD163L1  |
| SZ_Risk | scz-denovo-nonsyn | 60676  | PAPPA2   |
| SZ_Risk | scz-denovo-nonsyn | 57721  | METTTL14 |
| SZ_Risk | scz-denovo-nonsyn | 339451 | KLHL17   |
| SZ_Risk | scz-denovo-nonsyn | 90313  | TP53I13  |
| SZ_Risk | scz-denovo-nonsyn | 2903   | GRIN2A   |
| SZ_Risk | scz-denovo-nonsyn | 80314  | EPC1     |
| SZ_Risk | scz-denovo-nonsyn | 9902   | MRC2     |
| SZ_Risk | scz-denovo-nonsyn | 10994  | ILVBL    |
| SZ_Risk | scz-denovo-nonsyn | 50944  | SHANK1   |
| SZ_Risk | scz-denovo-nonsyn | 23259  | DDHD2    |
| SZ_Risk | scz-denovo-nonsyn | 154661 | RUNDC3B  |
| SZ_Risk | scz-denovo-nonsyn | 285513 | GPRIN3   |
| SZ_Risk | scz-denovo-nonsyn | 8857   | FCGBP    |

|         |                   |        |          |
|---------|-------------------|--------|----------|
| SZ_Risk | scz-denovo-nonsyn | 147657 | ZNF480   |
| SZ_Risk | scz-denovo-nonsyn | 84705  | GTPBP3   |
| SZ_Risk | scz-denovo-nonsyn | 9639   | ARHGEF10 |
| SZ_Risk | scz-denovo-nonsyn | 9826   | ARHGEF11 |
| SZ_Risk | scz-denovo-nonsyn | 55174  | INTS10   |
| SZ_Risk | scz-denovo-nonsyn | 60385  | TSKS     |
| SZ_Risk | scz-denovo-nonsyn | 353274 | ZNF445   |
| SZ_Risk | scz-denovo-nonsyn | 51663  | ZFR      |
| SZ_Risk | scz-denovo-nonsyn | 55628  | ZNF407   |
| SZ_Risk | scz-denovo-nonsyn | 22899  | ARHGEF15 |
| SZ_Risk | scz-denovo-nonsyn | 2895   | GRID2    |
| SZ_Risk | scz-denovo-nonsyn | 128025 | WDR64    |
| SZ_Risk | scz-denovo-nonsyn | 128853 | DUSP15   |
| SZ_Risk | scz-denovo-nonsyn | 431705 | ASTL     |
| SZ_Risk | scz-denovo-nonsyn | 3836   | KPNA1    |
| SZ_Risk | scz-denovo-nonsyn | 80831  | APOL5    |
| SZ_Risk | scz-denovo-nonsyn | 3156   | HMGCR    |
| SZ_Risk | scz-denovo-nonsyn | 8565   | YARS     |
| SZ_Risk | scz-denovo-nonsyn | 8452   | CUL3     |
| SZ_Risk | scz-denovo-nonsyn | 2783   | GNB2     |
| SZ_Risk | scz-denovo-nonsyn | 8994   | LIMD1    |
| SZ_Risk | scz-denovo-nonsyn | 58492  | ZNF77    |
| SZ_Risk | scz-denovo-nonsyn | 10681  | GNB5     |
| SZ_Risk | scz-denovo-nonsyn | 23225  | NUP210   |
| SZ_Risk | scz-denovo-nonsyn | 8470   | SORBS2   |
| SZ_Risk | scz-denovo-nonsyn | 8431   | NR0B2    |
| SZ_Risk | scz-denovo-nonsyn | 3655   | ITGA6    |
| SZ_Risk | scz-denovo-nonsyn | 1855   | DVL1     |
| SZ_Risk | scz-denovo-nonsyn | 57575  | PCDH10   |
| SZ_Risk | scz-denovo-nonsyn | 1327   | COX4I1   |
| SZ_Risk | scz-denovo-nonsyn | 26468  | LHX6     |
| SZ_Risk | scz-denovo-nonsyn | 23230  | VPS13A   |
| SZ_Risk | scz-denovo-nonsyn | 79791  | FBXO31   |
| SZ_Risk | scz-denovo-nonsyn | 9993   | DGCR2    |
| SZ_Risk | scz-denovo-nonsyn | 54832  | VPS13C   |
| SZ_Risk | scz-denovo-nonsyn | 23114  | NFASC    |
| SZ_Risk | scz-denovo-nonsyn | 116985 | ARAP1    |
| SZ_Risk | scz-denovo-nonsyn | 162517 | FBXO39   |
| SZ_Risk | scz-denovo-nonsyn | 729767 | CEACAM18 |
| SZ_Risk | scz-denovo-nonsyn | 54474  | KRT20    |
| SZ_Risk | scz-denovo-nonsyn | 2134   | EXTL1    |
| SZ_Risk | scz-denovo-nonsyn | 147183 | KRT25    |
| SZ_Risk | scz-denovo-nonsyn | 2035   | EPB41    |
| SZ_Risk | scz-denovo-nonsyn | 3107   | HLA-C    |
| SZ_Risk | scz-denovo-nonsyn | 56134  | PCDHAC2  |
| SZ_Risk | scz-denovo-nonsyn | 4588   | MUC6     |
| SZ_Risk | scz-denovo-nonsyn | 4627   | MYH9     |
| SZ_Risk | scz-denovo-nonsyn | 25849  | PARM1    |
| SZ_Risk | scz-denovo-nonsyn | 399909 | PCNXL3   |
| SZ_Risk | scz-denovo-nonsyn | 6935   | ZEB1     |
| SZ_Risk | scz-denovo-nonsyn | 415    | ARSE     |
| SZ_Risk | scz-denovo-nonsyn | 10458  | BAIAP2   |
| SZ_Risk | scz-denovo-nonsyn | 7840   | ALMS1    |
| SZ_Risk | scz-denovo-nonsyn | 9510   | ADAMTS1  |
| SZ_Risk | scz-denovo-nonsyn | 9508   | ADAMTS3  |
| SZ_Risk | scz-denovo-nonsyn | 113    | ADCY7    |
| SZ_Risk | scz-denovo-nonsyn | 1306   | COL15A1  |
| SZ_Risk | scz-denovo-nonsyn | 57700  | FAM160B1 |

|         |                   |        |          |
|---------|-------------------|--------|----------|
| SZ_Risk | scz-denovo-nonsyn | 11174  | ADAMTS6  |
| SZ_Risk | scz-denovo-nonsyn | 64760  | FAM160B2 |
| SZ_Risk | scz-denovo-nonsyn | 28964  | GIT1     |
| SZ_Risk | scz-denovo-nonsyn | 9140   | ATG12    |
| SZ_Risk | scz-denovo-nonsyn | 51150  | SDF4     |
| SZ_Risk | scz-denovo-nonsyn | 1108   | CHD4     |
| SZ_Risk | scz-denovo-nonsyn | 84872  | ZC3H10   |
| SZ_Risk | scz-denovo-nonsyn | 55620  | STAP2    |
| SZ_Risk | scz-denovo-nonsyn | 23523  | CABIN1   |
| SZ_Risk | scz-denovo-nonsyn | 92714  | ARRDC1   |
| SZ_Risk | scz-denovo-nonsyn | 64400  | AKTIP    |
| SZ_Risk | scz-denovo-nonsyn | 55269  | PSPC1    |
| SZ_Risk | scz-denovo-nonsyn | 6689   | SPIB     |
| SZ_Risk | scz-denovo-nonsyn | 1912   | PHC2     |
| SZ_Risk | scz-denovo-nonsyn | 7862   | BRPF1    |
| SZ_Risk | scz-denovo-nonsyn | 25836  | NIPBL    |
| SZ_Risk | scz-denovo-nonsyn | 387778 | SPDYC    |
| SZ_Risk | scz-denovo-nonsyn | 10290  | SPEG     |
| SZ_Risk | scz-denovo-nonsyn | 23228  | PLCL2    |
| SZ_Risk | scz-denovo-nonsyn | 26000  | TBC1D10B |
| SZ_Risk | scz-denovo-nonsyn | 10075  | HUWE1    |
| SZ_Risk | scz-denovo-nonsyn | 114784 | CSMD2    |
| SZ_Risk | scz-denovo-nonsyn | 115704 | EVI5L    |
| SZ_Risk | scz-denovo-nonsyn | 2532   | DARC     |
| SZ_Risk | scz-denovo-nonsyn | 7916   | PRRC2A   |
| SZ_Risk | scz-denovo-nonsyn | 132884 | EVC2     |
| SZ_Risk | scz-denovo-nonsyn | 23215  | PRRC2C   |
| SZ_Risk | scz-denovo-nonsyn | 9256   | BZRAP1   |
| SZ_Risk | scz-denovo-nonsyn | 57002  | YAE1D1   |
| SZ_Risk | scz-denovo-nonsyn | 26147  | PHF19    |
| SZ_Risk | scz-denovo-nonsyn | 28981  | IFT81    |
| SZ_Risk | scz-denovo-nonsyn | 7772   | ZNF229   |
| SZ_Risk | scz-denovo-nonsyn | 2193   | FARSA    |
| SZ_Risk | scz-denovo-nonsyn | 5029   | P2RY2    |
| SZ_Risk | scz-denovo-nonsyn | 57690  | TNRC6C   |
| SZ_Risk | scz-denovo-nonsyn | 84910  | TMEM87B  |
| SZ_Risk | scz-denovo-nonsyn | 158056 | MAMDC4   |
| SZ_Risk | scz-denovo-nonsyn | 126133 | ALDH16A1 |
| SZ_Risk | scz-denovo-nonsyn | 79165  | LENG1    |
| SZ_Risk | scz-denovo-nonsyn | 10002  | NR2E3    |
| SZ_Risk | scz-denovo-nonsyn | 57185  | NIPAL3   |
| SZ_Risk | scz-denovo-nonsyn | 8813   | DPM1     |
| SZ_Risk | scz-denovo-nonsyn | 9874   | TLK1     |
| SZ_Risk | scz-denovo-nonsyn | 2976   | GTF3C2   |
| SZ_Risk | scz-denovo-nonsyn | 54567  | DLL4     |
| SZ_Risk | scz-denovo-nonsyn | 26277  | TINF2    |
| SZ_Risk | scz-denovo-nonsyn | 22897  | CEP164   |
| SZ_Risk | scz-denovo-nonsyn | 5774   | PTPN3    |
| SZ_Risk | scz-denovo-nonsyn | 1806   | DPYD     |
| SZ_Risk | scz-denovo-nonsyn | 400954 | EML6     |
| SZ_Risk | scz-denovo-nonsyn | 124944 | C17orf49 |
| SZ_Risk | scz-denovo-nonsyn | 171023 | ASXL1    |
| SZ_Risk | scz-denovo-nonsyn | 27343  | POLL     |
| SZ_Risk | scz-denovo-nonsyn | 5792   | PTPRF    |
| SZ_Risk | scz-denovo-nonsyn | 5793   | PTPRG    |
| SZ_Risk | scz-denovo-nonsyn | 6263   | RYR3     |
| SZ_Risk | scz-denovo-nonsyn | 55183  | RIF1     |
| SZ_Risk | scz-denovo-nonsyn | 147929 | ZNF565   |



|         |                   |        |           |
|---------|-------------------|--------|-----------|
| SZ_Risk | scz-denovo-nonsyn | 5660   | PSAP      |
| SZ_Risk | scz-denovo-nonsyn | 5795   | PTPRJ     |
| SZ_Risk | scz-denovo-nonsyn | 90527  | DUOXA1    |
| SZ_Risk | scz-denovo-nonsyn | 405753 | DUOXA2    |
| SZ_Risk | scz-denovo-nonsyn | 56000  | NXF3      |
| SZ_Risk | scz-denovo-nonsyn | 160428 | ALDH1L2   |
| SZ_Risk | scz-denovo-nonsyn | 5797   | PTPRM     |
| SZ_Risk | scz-denovo-nonsyn | 54438  | GFOD1     |
| SZ_Risk | scz-denovo-nonsyn | 7915   | ALDH5A1   |
| SZ_Risk | scz-denovo-nonsyn | 768239 | PSAPL1    |
| SZ_Risk | scz-denovo-nonsyn | 22984  | PDCD11    |
| SZ_Risk | scz-denovo-nonsyn | 255101 | CCDC108   |
| SZ_Risk | scz-denovo-nonsyn | 154743 | C7orf60   |
| SZ_Risk | scz-denovo-nonsyn | 4674   | NAP1L2    |
| SZ_Risk | scz-denovo-nonsyn | 11278  | KLF12     |
| SZ_Risk | scz-denovo-nonsyn | 27336  | HTATSF1   |
| SZ_Risk | scz-denovo-nonsyn | 2064   | ERBB2     |
| SZ_Risk | scz-denovo-nonsyn | 6002   | RGS12     |
| SZ_Risk | scz-denovo-nonsyn | 63035  | BCORL1    |
| SZ_Risk | scz-denovo-nonsyn | 5087   | PBX1      |
| SZ_Risk | scz-denovo-nonsyn | 6793   | STK10     |
| SZ_Risk | scz-denovo-nonsyn | 23331  | TTC28     |
| SZ_Risk | scz-denovo-nonsyn | 6561   | SLC13A1   |
| SZ_Risk | scz-denovo-nonsyn | 7052   | TGM2      |
| SZ_Risk | scz-denovo-nonsyn | 2335   | FN1       |
| SZ_Risk | scz-denovo-nonsyn | 9659   | PDE4DIP   |
| SZ_Risk | scz-denovo-nonsyn | 131544 | CRYBG3    |
| SZ_Risk | scz-denovo-nonsyn | 1951   | CELSR3    |
| SZ_Risk | scz-denovo-nonsyn | 9928   | KIF14     |
| SZ_Risk | scz-denovo-nonsyn | 343641 | TGM6      |
| SZ_Risk | scz-denovo-nonsyn | 9600   | PITPNM1   |
| SZ_Risk | scz-denovo-nonsyn | 8831   | SYNGAP1   |
| SZ_Risk | scz-denovo-nonsyn | 5287   | PIK3C2B   |
| SZ_Risk | scz-denovo-nonsyn | 149095 | DCST1     |
| SZ_Risk | scz-denovo-nonsyn | 23039  | XPO7      |
| SZ_Risk | scz-denovo-nonsyn | 27252  | KLHL20    |
| SZ_Risk | scz-denovo-nonsyn | 81544  | GDPD5     |
| SZ_Risk | scz-denovo-nonsyn | 7257   | TSNAX     |
| SZ_Risk | scz-denovo-nonsyn | 22999  | RIMS1     |
| SZ_Risk | scz-denovo-nonsyn | 316    | AOX1      |
| SZ_Risk | scz-denovo-nonsyn | 547    | KIF1A     |
| SZ_Risk | scz-denovo-nonsyn | 4308   | TRPM1     |
| SZ_Risk | scz-denovo-nonsyn | 1379   | CR1L      |
| SZ_Risk | scz-denovo-nonsyn | 27243  | CHMP2A    |
| SZ_Risk | scz-denovo-nonsyn | 10641  | NPRL2     |
| SZ_Risk | scz-denovo-nonsyn | 1662   | DDX10     |
| SZ_Risk | scz-denovo-nonsyn | 387509 | GPR153    |
| SZ_Risk | scz-denovo-nonsyn | 199953 | TMEM201   |
| SZ_Risk | scz-denovo-nonsyn | 4843   | NOS2      |
| SZ_Risk | scz-denovo-nonsyn | 4846   | NOS3      |
| SZ_Risk | scz-denovo-nonsyn | 79633  | FAT4      |
| SZ_Risk | scz-denovo-nonsyn | 221393 | GPR115    |
| SZ_Risk | scz-denovo-nonsyn | 11260  | XPOT      |
| SZ_Risk | scz-denovo-nonsyn | 64324  | NSD1      |
| SZ_Risk | scz-denovo-nonsyn | 7126   | TNFAIP1   |
| SZ_Risk | scz-denovo-nonsyn | 9498   | SLC4A8    |
| SZ_Risk | scz-denovo-nonsyn | 56478  | EIF4ENIF1 |
| SZ_Risk | scz-denovo-nonsyn | 23499  | MACF1     |

|         |                   |           |          |
|---------|-------------------|-----------|----------|
| SZ_Risk | scz-denovo-nonsyn | 390110    | ACCSL    |
| SZ_Risk | scz-denovo-nonsyn | 79023     | NUP37    |
| SZ_Risk | scz-denovo-nonsyn | 92799     | SHKBP1   |
| SZ_Risk | scz-denovo-nonsyn | 113146    | AHNAK2   |
| SZ_Risk | scz-denovo-nonsyn | 55588     | MED29    |
| SZ_Risk | scz-denovo-nonsyn | 5189      | PEX1     |
| SZ_Risk | scz-denovo-nonsyn | 5708      | PSMD2    |
| SZ_Risk | scz-denovo-nonsyn | 440073    | IQSEC3   |
| SZ_Risk | scz-denovo-nonsyn | 54866     | PPP1R14D |
| SZ_Risk | scz-denovo-nonsyn | 283284    | IGSF22   |
| SZ_Risk | scz-denovo-nonsyn | 55824     | PAG1     |
| SZ_Risk | scz-denovo-nonsyn | 57182     | ANKRD50  |
| SZ_Risk | scz-denovo-nonsyn | 146279    | TEKT5    |
| SZ_Risk | scz-denovo-nonsyn | 23132     | RAD54L2  |
| SZ_Risk | scz-denovo-nonsyn | 9923      | ZBTB40   |
| SZ_Risk | scz-denovo-nonsyn | 51050     | PI15     |
| SZ_Risk | scz-denovo-nonsyn | 150160    | CCT8L2   |
| SZ_Risk | scz-denovo-nonsyn | 84878     | ZBTB45   |
| SZ_Risk | scz-denovo-nonsyn | 23037     | PDZD2    |
| SZ_Risk | scz-denovo-nonsyn | 286       | ANK1     |
| SZ_Risk | scz-denovo-nonsyn | 3320      | HSP90AA1 |
| SZ_Risk | scz-denovo-nonsyn | 64285     | RHBDF1   |
| SZ_Risk | scz-denovo-nonsyn | 64061     | TSPYL2   |
| SZ_Risk | scz-denovo-nonsyn | 338440    | ANO9     |
| SZ_Risk | scz-denovo-nonsyn | 2036      | EPB41L1  |
| SZ_Risk | scz-denovo-nonsyn | 558       | AXL      |
| SZ_Risk | scz-denovo-nonsyn | 54617     | INO80    |
| SZ_Risk | scz-denovo-nonsyn | 25962     | KIAA1429 |
| SZ_Risk | scz-denovo-nonsyn | 128553    | TSHZ2    |
| SZ_Risk | scz-denovo-nonsyn | 5863      | RGL2     |
| SZ_Risk | scz-denovo-nonsyn | 54457     | TAF7L    |
| SZ_Risk | scz-denovo-nonsyn | 9057      | SLC7A6   |
| SZ_Risk | scz-denovo-nonsyn | 161       | AP2A2    |
| SZ_Risk | scz-denovo-nonsyn | 100101267 | POM121C  |
| SZ_Risk | scz-denovo-nonsyn | 83715     | ESPN     |
| SZ_Risk | scz-denovo-nonsyn | 10659     | CELF2    |
| SZ_Risk | scz-denovo-nonsyn | 837       | CASP4    |
| SZ_Risk | scz-denovo-nonsyn | 4628      | MYH10    |
| SZ_Risk | scz-denovo-nonsyn | 4629      | MYH11    |
| SZ_Risk | scz-denovo-nonsyn | 1003      | CDH5     |
| SZ_Risk | scz-denovo-nonsyn | 221955    | DAGLB    |
| SZ_Risk | scz-denovo-nonsyn | 5579      | PRKCB    |
| SZ_Risk | scz-denovo-nonsyn | 10560     | SLC19A2  |
| SZ_Risk | scz-denovo-nonsyn | 55572     | FOXRED1  |
| SZ_Risk | scz-denovo-nonsyn | 317703    | VN1R4    |
| SZ_Risk | scz-denovo-nonsyn | 81794     | ADAMTS10 |
| SZ_Risk | scz-denovo-nonsyn | 6880      | TAF9     |
| SZ_Risk | scz-denovo-nonsyn | 1207      | CLNS1A   |
| SZ_Risk | scz-denovo-nonsyn | 155185    | AMZ1     |
| SZ_Risk | scz-denovo-nonsyn | 7453      | WARS     |
| SZ_Risk | scz-denovo-nonsyn | 586       | BCAT1    |
| SZ_Risk | scz-denovo-nonsyn | 84033     | OBSCN    |
| SZ_Risk | scz-denovo-nonsyn | 51366     | UBR5     |
| SZ_Risk | scz-denovo-nonsyn | 728621    | CCDC30   |
| SZ_Risk | scz-denovo-nonsyn | 29979     | UBQLN1   |
| SZ_Risk | scz-denovo-nonsyn | 79142     | PHF23    |
| SZ_Risk | scz-denovo-nonsyn | 9875      | URB1     |
| SZ_Risk | scz-denovo-nonsyn | 9816      | URB2     |

|         |                   |        |          |
|---------|-------------------|--------|----------|
| SZ_Risk | scz-denovo-nonsyn | 50807  | ASAP1    |
| SZ_Risk | scz-denovo-nonsyn | 57523  | NYNRIN   |
| SZ_Risk | scz-denovo-nonsyn | 7272   | TTK      |
| SZ_Risk | scz-denovo-nonsyn | 339829 | CCDC39   |
| SZ_Risk | scz-denovo-nonsyn | 2167   | FABP4    |
| SZ_Risk | scz-denovo-nonsyn | 7273   | TTN      |
| SZ_Risk | scz-denovo-nonsyn | 23187  | PHLDB1   |
| SZ_Risk | scz-denovo-nonsyn | 7175   | TPR      |
| SZ_Risk | scz-denovo-nonsyn | 85460  | ZNF518B  |
| SZ_Risk | scz-denovo-nonsyn | 23266  | LPHN2    |
| SZ_Risk | scz-denovo-nonsyn | 84775  | ZNF607   |
| SZ_Risk | scz-denovo-nonsyn | 129446 | XIRP2    |
| SZ_Risk | scz-denovo-nonsyn | 51314  | NME8     |
| SZ_Risk | scz-denovo-nonsyn | 128876 | FAM83C   |
| SZ_Risk | scz-denovo-nonsyn | 51778  | MYO22    |
| SZ_Risk | scz-denovo-nonsyn | 158471 | PRUNE2   |
| SZ_Risk | scz-denovo-nonsyn | 2475   | MTOR     |
| SZ_Risk | scz-denovo-nonsyn | 2736   | GLI2     |
| SZ_Risk | scz-denovo-nonsyn | 2737   | GLI3     |
| SZ_Risk | scz-denovo-nonsyn | 80725  | SRCIN1   |
| SZ_Risk | scz-denovo-nonsyn | 8604   | SLC25A12 |
| SZ_Risk | scz-denovo-nonsyn | 4796   | TONSL    |
| SZ_Risk | scz-denovo-nonsyn | 23025  | UNC13A   |
| SZ_Risk | scz-denovo-nonsyn | 26505  | CNNM3    |
| SZ_Risk | scz-denovo-nonsyn | 440279 | UNC13C   |
| SZ_Risk | scz-denovo-nonsyn | 8242   | KDM5C    |
| SZ_Risk | scz-denovo-nonsyn | 1281   | COL3A1   |
| SZ_Risk | scz-denovo-nonsyn | 26090  | ABHD12   |
| SZ_Risk | scz-denovo-nonsyn | 84446  | BRSK1    |
| SZ_Risk | scz-denovo-nonsyn | 1659   | DHX8     |
| SZ_Risk | scz-denovo-nonsyn | 54798  | DCHS2    |
| SZ_Risk | scz-denovo-nonsyn | 9445   | ITM2B    |
| SZ_Risk | scz-denovo-nonsyn | 81618  | ITM2C    |
| SZ_Risk | scz-denovo-nonsyn | 55741  | EDEM2    |
| SZ_Risk | scz-denovo-nonsyn | 83481  | EPPK1    |
| SZ_Risk | scz-denovo-nonsyn | 22906  | TRAK1    |
| SZ_Risk | scz-denovo-nonsyn | 255394 | TCP11L2  |
| SZ_Risk | scz-denovo-nonsyn | 9742   | IFT140   |
| SZ_Risk | scz-denovo-nonsyn | 1969   | EPHA2    |
| SZ_Risk | scz-denovo-nonsyn | 400566 | C17orf97 |
| SZ_Risk | scz-denovo-nonsyn | 399687 | MYO18A   |
| SZ_Risk | scz-denovo-nonsyn | 57221  | KIAA1244 |
| SZ_Risk | scz-denovo-nonsyn | 84700  | MYO18B   |
| SZ_Risk | scz-denovo-nonsyn | 29965  | CDIP1    |
| SZ_Risk | scz-denovo-nonsyn | 1180   | CLCN1    |
| SZ_Risk | scz-denovo-nonsyn | 59     | ACTA2    |
| SZ_Risk | scz-denovo-nonsyn | 348327 | ZNF530   |
| SZ_Risk | scz-denovo-nonsyn | 6651   | SON      |
| SZ_Risk | scz-denovo-nonsyn | 55205  | ZNF532   |
| SZ_Risk | scz-denovo-nonsyn | 5116   | PCNT     |
| SZ_Risk | scz-denovo-nonsyn | 9332   | CD163    |
| SZ_Risk | scz-denovo-nonsyn | 119749 | OR4C46   |
| SZ_Risk | scz-denovo-nonsyn | 9745   | ZNF536   |
| SZ_Risk | scz-denovo-nonsyn | 6646   | SOAT1    |
| SZ_Risk | scz-denovo-nonsyn | 23648  | SSBP3    |
| SZ_Risk | scz-denovo-nonsyn | 9905   | SGSM2    |
| SZ_Risk | scz-denovo-nonsyn | 84869  | CBR4     |
| SZ_Risk | scz-denovo-nonsyn | 27044  | SND1     |

|         |                       |        |          |
|---------|-----------------------|--------|----------|
| SZ_Risk | scz-denovo-nonsyn     | 3708   | ITPR1    |
| SZ_Risk | scz-denovo-nonsyn     | 5599   | MAPK8    |
| SZ_Risk | scz-denovo-nonsyn     | 25981  | DNAH1    |
| SZ_Risk | scz-denovo-nonsyn     | 51012  | SLMO2    |
| SZ_Risk | scz-denovo-nonsyn     | 55870  | ASH1L    |
| SZ_Risk | scz-denovo-nonsyn     | 51490  | C9orf114 |
| SZ_Risk | scz-denovo-nonsyn     | 1770   | DNAH9    |
| SZ_Risk | scz-denovo-nonsyn     | 157570 | ESCO2    |
| SZ_Risk | scz-denovo-nonsyn     | 1292   | COL6A2   |
| SZ_Risk | scz-denovo-nonsyn     | 57829  | ZP4      |
| SZ_Risk | scz-denovo-nonsyn     | 3363   | HTR7     |
| SZ_Risk | scz-denovo-nonsyn     | 10125  | RASGRP1  |
| SZ_Risk | scz-denovo-nonsyn     | 55959  | SULF2    |
| SZ_Risk | scz-denovo-nonsyn     | 80028  | FBXL18   |
| SZ_Risk | scz-denovo-nonsyn     | 54620  | FBXL19   |
| SZ_Risk | scz-denovo-nonsyn     | 56154  | TEX15    |
| SZ_Risk | scz-denovo-nonsyn     | 207    | AKT1     |
| SZ_Risk | scz-denovo-nonsyn     | 9592   | IER2     |
| SZ_Risk | scz-denovo-nonsyn     | 343263 | MYBPHL   |
| SZ_Risk | scz-denovo-nonsyn     | 4703   | NEB      |
| SZ_Risk | scz-denovo-nonsyn     | 83593  | RASSF5   |
| SZ_Risk | scz-denovo-nonsyn     | 9415   | FADS2    |
| SZ_Risk | scz-denovo-nonsyn     | 388662 | SLC6A17  |
| SZ_Risk | scz-denovo-nonsyn     | 26512  | INTS6    |
| SZ_Risk | scz-denovo-nonsyn     | 2182   | ACSL4    |
| SZ_Risk | scz-denovo-nonsyn     | 51703  | ACSL5    |
| SZ_Risk | scz-denovo-nonsyn     | 1833   | EPYC     |
| SZ_Risk | scz-denovo-nonsyn     | 81033  | KCNH6    |
| SZ_Risk | scz-denovo-nonsyn     | 79088  | ZNF426   |
| SZ_Risk | scz-denovo-nonsyn     | 6125   | RPL5     |
| SZ_Risk | scz-denovo-nonsyn     | 27284  | SULT1B1  |
| SZ_Risk | scz-denovo-nonsyn     | 124446 | TMEM219  |
| SZ_Risk | scz-denovo-nonsyn     | 54848  | ARHGEF38 |
| SZ_Risk | scz-denovo-nonsyn     | 23405  | DICER1   |
| SZ_Risk | scz-denovo-nonsyn     | 11097  | NUPL2    |
| SZ_Risk | scz-denovo-nonsyn     | 84061  | MAGT1    |
| SZ_Risk | scz-denovo-nonsyn     | 84690  | SPATA22  |
| SZ_Risk | scz-denovo-nonsyn     | 29108  | PYCARD   |
| SZ_Risk | scz-denovo-nonsyn     | 56934  | CA10     |
| SZ_Risk | scz-denovo-nonsyn     | 6453   | ITSN1    |
| SZ_Risk | scz-denovo-nonsyn     | 9378   | NRXN1    |
| SZ_Risk | scz-denovo-nonsyn     | 79628  | SH3TC2   |
| SZ_Risk | scz-denovo-nonsyn     | 9043   | SPAG9    |
| SZ_Risk | scz-denovo-nonsyn     | 5079   | PAX5     |
| SZ_Risk | scz-denovo-nonsyn     | 286046 | XKR6     |
| SZ_Risk | scz-denovo-nonsyn     | 6713   | SQLE     |
| SZ_Risk | scz-denovo-nonsyn     | 118932 | ANKRD22  |
| SZ_Risk | scz-denovo-nonsyn     | 389668 | XKR9     |
| SZ_Risk | scz-denovo-nonsyn     | 64781  | CERK     |
| SZ_Risk | scz-denovo-nonsyn     | 23303  | KIF13B   |
| SZ_Risk | scz-denovo-nonsyn     | 196528 | ARID2    |
| SZ_Risk | scz-denovo-nonsyn     | 83741  | TFAP2D   |
| SZ_Risk | scz-denovo-nonsyn     | 134549 | SHROOM1  |
| SZ_Risk | scz-denovo-nonsyn     | 3888   | KRT82    |
| SZ_Risk | scz-denovo-nonsyn     | 91746  | YTHDC1   |
| SZ_Risk | scz-denovo-nonsyn     | 2077   | ERF      |
| SZ_Risk | scz-denovo-nonsyn     | 4350   | MPG      |
| SZ_DE   | CM_NO_SVA_UP_FDR_0.05 | 6335   | SCN9A    |

|       |                       |        |          |
|-------|-----------------------|--------|----------|
| SZ_DE | CM_NO_SVA_UP_FDR_0.05 | 389206 | BEND4    |
| SZ_DE | CM_NO_SVA_UP_FDR_0.05 | 80055  | PGAP1    |
| SZ_DE | CM_NO_SVA_UP_FDR_0.05 | 6870   | TACR3    |
| SZ_DE | CM_NO_SVA_UP_FDR_0.05 | 55103  | RALGPS2  |
| SZ_DE | CM_NO_SVA_UP_FDR_0.05 | 22881  | ANKRD6   |
| SZ_DE | CM_NO_SVA_UP_FDR_0.05 | 285513 | GPRIN3   |
| SZ_DE | CM_NO_SVA_UP_FDR_0.05 | 80014  | WWC2     |
| SZ_DE | CM_NO_SVA_UP_FDR_0.05 | 5991   | RFX3     |
| SZ_DE | CM_NO_SVA_UP_FDR_0.05 | 2690   | GHR      |
| SZ_DE | CM_NO_SVA_UP_FDR_0.05 | 79669  | C3orf52  |
| SZ_DE | CM_NO_SVA_UP_FDR_0.05 | 117177 | RAB3IP   |
| SZ_DE | CM_NO_SVA_UP_FDR_0.05 | 330    | BIRC3    |
| SZ_DE | CM_NO_SVA_UP_FDR_0.05 | 9750   | FAM65B   |
| SZ_DE | CM_NO_SVA_UP_FDR_0.05 | 116    | ADCYAP1  |
| SZ_DE | CM_NO_SVA_UP_FDR_0.05 | 84458  | LCOR     |
| SZ_DE | CM_NO_SVA_UP_FDR_0.05 | 10100  | TSPAN2   |
| SZ_DE | CM_NO_SVA_UP_FDR_0.05 | 64283  | ARHGEF28 |
| SZ_DE | CM_NO_SVA_UP_FDR_0.05 | 4160   | MC4R     |
| SZ_DE | CM_NO_SVA_UP_FDR_0.05 | 23200  | ATP11B   |
| SZ_DE | CM_NO_SVA_UP_FDR_0.05 | 23002  | DAAM1    |
| SZ_DE | CM_NO_SVA_UP_FDR_0.05 | 6095   | RORA     |
| SZ_DE | CM_NO_SVA_UP_FDR_0.05 | 793    | CALB1    |
| SZ_DE | CM_NO_SVA_UP_FDR_0.05 | 57684  | ZBTB26   |
| SZ_DE | CM_NO_SVA_UP_FDR_0.05 | 128611 | ZNF831   |
| SZ_DE | CM_NO_SVA_UP_FDR_0.05 | 26973  | CHORDC1  |
| SZ_DE | CM_NO_SVA_UP_FDR_0.05 | 2334   | AFF2     |
| SZ_DE | CM_NO_SVA_UP_FDR_0.05 | 54891  | INO80D   |
| SZ_DE | CM_NO_SVA_UP_FDR_0.05 | 23429  | RYBP     |
| SZ_DE | CM_NO_SVA_UP_FDR_0.05 | 10178  | TENM1    |
| SZ_DE | CM_NO_SVA_UP_FDR_0.05 | 154007 | SNRNP48  |
| SZ_DE | CM_NO_SVA_UP_FDR_0.05 | 55466  | DNAJA4   |
| SZ_DE | CM_NO_SVA_UP_FDR_0.05 | 55033  | FKBP14   |
| SZ_DE | CM_NO_SVA_UP_FDR_0.05 | 9991   | PTBP3    |
| SZ_DE | CM_NO_SVA_UP_FDR_0.05 | 80306  | MED28    |
| SZ_DE | CM_NO_SVA_UP_FDR_0.05 | 79139  | DERL1    |
| SZ_DE | CM_NO_SVA_UP_FDR_0.05 | 389677 | RBM12B   |
| SZ_DE | CM_NO_SVA_UP_FDR_0.05 | 2558   | GABRA5   |
| SZ_DE | CM_NO_SVA_UP_FDR_0.05 | 158399 | ZNF483   |
| SZ_DE | CM_NO_SVA_UP_FDR_0.05 | 25896  | INTS7    |
| SZ_DE | CM_NO_SVA_UP_FDR_0.05 | 400120 | SERTM1   |
| SZ_DE | CM_NO_SVA_UP_FDR_0.05 | 3082   | HGF      |
| SZ_DE | CM_NO_SVA_UP_FDR_0.05 | 51762  | RAB8B    |
| SZ_DE | CM_NO_SVA_UP_FDR_0.05 | 5067   | CNTN3    |
| SZ_DE | CM_NO_SVA_UP_FDR_0.05 | 2149   | F2R      |
| SZ_DE | CM_NO_SVA_UP_FDR_0.05 | 10914  | PAPOLA   |
| SZ_DE | CM_NO_SVA_UP_FDR_0.05 | 54726  | OTUD4    |
| SZ_DE | CM_NO_SVA_UP_FDR_0.05 | 54734  | RAB39A   |
| SZ_DE | CM_NO_SVA_UP_FDR_0.05 | 23089  | PEG10    |
| SZ_DE | CM_NO_SVA_UP_FDR_0.05 | 246175 | CNOT6L   |
| SZ_DE | CM_NO_SVA_UP_FDR_0.05 | 3738   | KCNA3    |
| SZ_DE | CM_NO_SVA_UP_FDR_0.05 | 7762   | ZNF215   |
| SZ_DE | CM_NO_SVA_UP_FDR_0.05 | 8658   | TNKS     |
| SZ_DE | CM_NO_SVA_UP_FDR_0.05 | 83448  | PUS7L    |
| SZ_DE | CM_NO_SVA_UP_FDR_0.05 | 4015   | LOX      |
| SZ_DE | CM_NO_SVA_UP_FDR_0.05 | 219623 | TMEM26   |
| SZ_DE | CM_NO_SVA_UP_FDR_0.05 | 11231  | SEC63    |
| SZ_DE | CM_NO_SVA_UP_FDR_0.05 | 57472  | CNOT6    |
| SZ_DE | CM_NO_SVA_UP_FDR_0.05 | 92126  | DSEL     |

|       |                       |           |              |
|-------|-----------------------|-----------|--------------|
| SZ_DE | CM_NO_SVA_UP_FDR_0.05 | 64853     | AIDA         |
| SZ_DE | CM_NO_SVA_UP_FDR_0.05 | 166336    | PRICKLE2     |
| SZ_DE | CM_NO_SVA_UP_FDR_0.05 | 200576    | PIKFYVE      |
| SZ_DE | CM_NO_SVA_UP_FDR_0.05 | 57600     | FNIP2        |
| SZ_DE | CM_NO_SVA_UP_FDR_0.05 | 90134     | KCNH7        |
| SZ_DE | CM_NO_SVA_UP_FDR_0.05 | 23760     | PITPNB       |
| SZ_DE | CM_NO_SVA_UP_FDR_0.05 | 3189      | HNRNPH3      |
| SZ_DE | CM_NO_SVA_UP_FDR_0.05 | 121536    | AEBP2        |
| SZ_DE | CM_NO_SVA_UP_FDR_0.05 | 100216479 | LOC100216479 |
| SZ_DE | CM_NO_SVA_UP_FDR_0.05 | 54778     | RNF111       |
| SZ_DE | CM_NO_SVA_UP_FDR_0.05 | 161357    | MDGA2        |
| SZ_DE | CM_NO_SVA_UP_FDR_0.05 | 64393     | ZMAT3        |
| SZ_DE | CM_NO_SVA_UP_FDR_0.05 | 116150    | NUS1         |
| SZ_DE | CM_NO_SVA_UP_FDR_0.05 | 285220    | EPHA6        |
| SZ_DE | CM_NO_SVA_UP_FDR_0.05 | 8690      | JRKL         |
| SZ_DE | CM_NO_SVA_UP_FDR_0.05 | 5865      | RAB3B        |
| SZ_DE | CM_NO_SVA_UP_FDR_0.05 | 57708     | MIER1        |
| SZ_DE | CM_NO_SVA_UP_FDR_0.05 | 8001      | GLRA3        |
| SZ_DE | CM_NO_SVA_UP_FDR_0.05 | 8976      | WASL         |
| SZ_DE | CM_NO_SVA_UP_FDR_0.05 | 127253    | TYW3         |
| SZ_DE | CM_NO_SVA_UP_FDR_0.05 | 85465     | EPT1         |
| SZ_DE | CM_NO_SVA_UP_FDR_0.05 | 1452      | CSNK1A1      |
| SZ_DE | CM_NO_SVA_UP_FDR_0.05 | 79836     | LONRF3       |
| SZ_DE | CM_NO_SVA_UP_FDR_0.05 | 2673      | GFPT1        |
| SZ_DE | CM_NO_SVA_UP_FDR_0.05 | 22862     | FNDC3A       |
| SZ_DE | CM_NO_SVA_UP_FDR_0.05 | 54989     | ZNF770       |
| SZ_DE | CM_NO_SVA_UP_FDR_0.05 | 256130    | TMEM196      |
| SZ_DE | CM_NO_SVA_UP_FDR_0.05 | 27        | ABL2         |
| SZ_DE | CM_NO_SVA_UP_FDR_0.05 | 57687     | VAT1L        |
| SZ_DE | CM_NO_SVA_UP_FDR_0.05 | 54733     | SLC35F2      |
| SZ_DE | CM_NO_SVA_UP_FDR_0.05 | 1600      | DAB1         |
| SZ_DE | CM_NO_SVA_UP_FDR_0.05 | 10251     | SPRY3        |
| SZ_DE | CM_NO_SVA_UP_FDR_0.05 | 3479      | IGF1         |
| SZ_DE | CM_NO_SVA_UP_FDR_0.05 | 6120      | RPE          |
| SZ_DE | CM_NO_SVA_UP_FDR_0.05 | 64762     | GAREM        |
| SZ_DE | CM_NO_SVA_UP_FDR_0.05 | 25940     | FAM98A       |
| SZ_DE | CM_NO_SVA_UP_FDR_0.05 | 4147      | MATN2        |
| SZ_DE | CM_NO_SVA_UP_FDR_0.05 | 283464    | GXYLT1       |
| SZ_DE | CM_NO_SVA_UP_FDR_0.05 | 64398     | MPP5         |
| SZ_DE | CM_NO_SVA_UP_FDR_0.05 | 55086     | CXorf57      |
| SZ_DE | CM_NO_SVA_UP_FDR_0.05 | 1012      | CDH13        |
| SZ_DE | CM_NO_SVA_UP_FDR_0.05 | 3181      | HNRNPA2B1    |
| SZ_DE | CM_NO_SVA_UP_FDR_0.05 | 253512    | SLC25A30     |
| SZ_DE | CM_NO_SVA_UP_FDR_0.05 | 7077      | TIMP2        |
| SZ_DE | CM_NO_SVA_UP_FDR_0.05 | 650655    | ABCA17P      |
| SZ_DE | CM_NO_SVA_UP_FDR_0.05 | 9874      | TLK1         |
| SZ_DE | CM_NO_SVA_UP_FDR_0.05 | 54542     | RC3H2        |
| SZ_DE | CM_NO_SVA_UP_FDR_0.05 | 317       | APAF1        |
| SZ_DE | CM_NO_SVA_UP_FDR_0.05 | 57484     | RNF150       |
| SZ_DE | CM_NO_SVA_UP_FDR_0.05 | 219333    | USP12        |
| SZ_DE | CM_NO_SVA_UP_FDR_0.05 | 55279     | ZNF654       |
| SZ_DE | CM_NO_SVA_UP_FDR_0.05 | 10903     | MTMR11       |
| SZ_DE | CM_NO_SVA_UP_FDR_0.05 | 166785    | MMAA         |
| SZ_DE | CM_NO_SVA_UP_FDR_0.05 | 5471      | PPAT         |
| SZ_DE | CM_NO_SVA_UP_FDR_0.05 | 129450    | TYW5         |
| SZ_DE | CM_NO_SVA_UP_FDR_0.05 | 146057    | TTBK2        |
| SZ_DE | CM_NO_SVA_UP_FDR_0.05 | 57532     | NUFIP2       |
| SZ_DE | CM_NO_SVA_UP_FDR_0.05 | 85460     | ZNF518B      |

|       |                       |           |              |
|-------|-----------------------|-----------|--------------|
| SZ_DE | CM_NO_SVA_UP_FDR_0.05 | 3320      | HSP90AA1     |
| SZ_DE | CM_NO_SVA_UP_FDR_0.05 | 149041    | RC3H1        |
| SZ_DE | CM_NO_SVA_UP_FDR_0.05 | 11320     | MGAT4A       |
| SZ_DE | CM_NO_SVA_UP_FDR_0.05 | 399959    | MIR100HG     |
| SZ_DE | CM_NO_SVA_UP_FDR_0.05 | 5610      | EIF2AK2      |
| SZ_DE | CM_NO_SVA_UP_FDR_0.05 | 604       | BCL6         |
| SZ_DE | CM_NO_SVA_UP_FDR_0.05 | 1540      | CYLD         |
| SZ_DE | CM_NO_SVA_UP_FDR_0.05 | 8476      | CDC42BPA     |
| SZ_DE | CM_NO_SVA_UP_FDR_0.05 | 162394    | SLFN5        |
| SZ_DE | CM_NO_SVA_UP_FDR_0.05 | 3598      | IL13RA2      |
| SZ_DE | CM_NO_SVA_UP_FDR_0.05 | 79071     | ELOVL6       |
| SZ_DE | CM_NO_SVA_UP_FDR_0.05 | 140890    | SREK1        |
| SZ_DE | CM_NO_SVA_UP_FDR_0.05 | 56829     | ZC3HAV1      |
| SZ_DE | CM_NO_SVA_UP_FDR_0.05 | 101927193 | LOC101927193 |
| SZ_DE | CM_NO_SVA_UP_FDR_0.05 | 390616    | ANKRD34C     |
| SZ_DE | CM_NO_SVA_UP_FDR_0.05 | 8087      | FXR1         |
| SZ_DE | CM_NO_SVA_UP_FDR_0.05 | 51361     | HOOK1        |
| SZ_DE | CM_NO_SVA_UP_FDR_0.05 | 27324     | TOX3         |
| SZ_DE | CM_NO_SVA_UP_FDR_0.05 | 221895    | JAZF1        |
| SZ_DE | CM_NO_SVA_UP_FDR_0.05 | 50650     | ARHGEF3      |
| SZ_DE | CM_NO_SVA_UP_FDR_0.05 | 205       | AK4          |
| SZ_DE | CM_NO_SVA_UP_FDR_0.05 | 6925      | TCF4         |
| SZ_DE | CM_NO_SVA_UP_FDR_0.05 | 5927      | KDM5A        |
| SZ_DE | CM_NO_SVA_UP_FDR_0.05 | 57182     | ANKRD50      |
| SZ_DE | CM_NO_SVA_UP_FDR_0.05 | 167227    | DCP2         |
| SZ_DE | CM_NO_SVA_UP_FDR_0.05 | 7514      | XPO1         |
| SZ_DE | CM_NO_SVA_UP_FDR_0.05 | 56647     | BCCIP        |
| SZ_DE | CM_NO_SVA_UP_FDR_0.05 | 9320      | TRIP12       |
| SZ_DE | CM_NO_SVA_UP_FDR_0.05 | 9877      | ZC3H11A      |
| SZ_DE | CM_NO_SVA_UP_FDR_0.05 | 27146     | FAM184B      |
| SZ_DE | CM_NO_SVA_UP_FDR_0.05 | 27152     | INTU         |
| SZ_DE | CM_NO_SVA_UP_FDR_0.05 | 23411     | SIRT1        |
| SZ_DE | CM_NO_SVA_UP_FDR_0.05 | 92597     | MOB1B        |
| SZ_DE | CM_NO_SVA_UP_FDR_0.05 | 7273      | TTN          |
| SZ_DE | CM_NO_SVA_UP_FDR_0.05 | 159090    | FAM122B      |
| SZ_DE | CM_NO_SVA_UP_FDR_0.05 | 92        | ACVR2A       |
| SZ_DE | CM_NO_SVA_UP_FDR_0.05 | 10146     | G3BP1        |
| SZ_DE | CM_NO_SVA_UP_FDR_0.05 | 55728     | N4BP2        |
| SZ_DE | CM_NO_SVA_UP_FDR_0.05 | 57223     | SMEK2        |
| SZ_DE | CM_NO_SVA_UP_FDR_0.05 | 11052     | CPSF6        |
| SZ_DE | CM_NO_SVA_UP_FDR_0.05 | 4673      | NAP1L1       |
| SZ_DE | CM_NO_SVA_UP_FDR_0.05 | 10884     | MRPS30       |
| SZ_DE | CM_NO_SVA_UP_FDR_0.05 | 139065    | SLITRK4      |
| SZ_DE | CM_NO_SVA_UP_FDR_0.05 | 29068     | ZBTB44       |
| SZ_DE | CM_NO_SVA_UP_FDR_0.05 | 7073      | TIAL1        |
| SZ_DE | CM_NO_SVA_UP_FDR_0.05 | 153222    | CREBRF       |
| SZ_DE | CM_NO_SVA_UP_FDR_0.05 | 56245     | C21orf62     |
| SZ_DE | CM_NO_SVA_UP_FDR_0.05 | 10116     | FEM1B        |
| SZ_DE | CM_NO_SVA_UP_FDR_0.05 | 3192      | HNRNPU       |
| SZ_DE | CM_NO_SVA_UP_FDR_0.05 | 10285     | SMNDC1       |
| SZ_DE | CM_NO_SVA_UP_FDR_0.05 | 100506606 | LOC100506606 |
| SZ_DE | CM_NO_SVA_UP_FDR_0.05 | 3730      | KAL1         |
| SZ_DE | CM_NO_SVA_UP_FDR_0.05 | 64795     | RMND5A       |
| SZ_DE | CM_NO_SVA_UP_FDR_0.05 | 9001      | HAP1         |
| SZ_DE | CM_NO_SVA_UP_FDR_0.05 | 9931      | HELZ         |
| SZ_DE | CM_NO_SVA_UP_FDR_0.05 | 7803      | PTP4A1       |
| SZ_DE | CM_NO_SVA_UP_FDR_0.05 | 4023      | LPL          |
| SZ_DE | CM_NO_SVA_UP_FDR_0.05 | 65065     | NBEAL1       |

|       |                       |           |              |
|-------|-----------------------|-----------|--------------|
| SZ_DE | CM_NO_SVA_UP_FDR_0.05 | 115827    | RAB3C        |
| SZ_DE | CM_NO_SVA_UP_FDR_0.05 | 1809      | DPYSL3       |
| SZ_DE | CM_NO_SVA_UP_FDR_0.05 | 23603     | CORO1C       |
| SZ_DE | CM_NO_SVA_UP_FDR_0.05 | 4154      | MBNL1        |
| SZ_DE | CM_NO_SVA_UP_FDR_0.05 | 403314    | APOBEC4      |
| SZ_DE | CM_NO_SVA_UP_FDR_0.05 | 84919     | PPP1R15B     |
| SZ_DE | CM_NO_SVA_UP_FDR_0.05 | 91851     | CHRD1        |
| SZ_DE | CM_NO_SVA_UP_FDR_0.05 | 8539      | API5         |
| SZ_DE | CM_NO_SVA_UP_FDR_0.05 | 5033      | P4HA1        |
| SZ_DE | CM_NO_SVA_UP_FDR_0.05 | 22847     | ZNF507       |
| SZ_DE | CM_NO_SVA_UP_FDR_0.05 | 642273    | FAM110C      |
| SZ_DE | CM_NO_SVA_UP_FDR_0.05 | 113251    | LARP4        |
| SZ_DE | CM_NO_SVA_UP_FDR_0.05 | 56937     | PMEPA1       |
| SZ_DE | CM_NO_SVA_UP_FDR_0.05 | 6526      | SLC5A3       |
| SZ_DE | CM_NO_SVA_UP_FDR_0.05 | 56987     | BBX          |
| SZ_DE | CM_NO_SVA_UP_FDR_0.05 | 25849     | PARM1        |
| SZ_DE | CM_NO_SVA_UP_FDR_0.05 | 114294    | LACTB        |
| SZ_DE | CM_NO_SVA_UP_FDR_0.05 | 51141     | INSIG2       |
| SZ_DE | CM_NO_SVA_UP_FDR_0.05 | 23240     | KIAA0922     |
| SZ_DE | CM_NO_SVA_UP_FDR_0.05 | 492311    | IGIP         |
| SZ_DE | CM_NO_SVA_UP_FDR_0.05 | 80351     | TNKS2        |
| SZ_DE | CM_NO_SVA_UP_FDR_0.05 | 7436      | VLDLR        |
| SZ_DE | CM_NO_SVA_UP_FDR_0.05 | 64376     | IKZF5        |
| SZ_DE | CM_NO_SVA_UP_FDR_0.05 | 7223      | TRPC4        |
| SZ_DE | CM_NO_SVA_UP_FDR_0.05 | 100505532 | LOC100505532 |
| SZ_DE | CM_NO_SVA_UP_FDR_0.05 | 283742    | FAM98B       |
| SZ_DE | CM_NO_SVA_UP_FDR_0.05 | 9317      | PTER         |
| SZ_DE | CM_NO_SVA_UP_FDR_0.05 | 8545      | CGGBP1       |
| SZ_DE | CM_NO_SVA_UP_FDR_0.05 | 2562      | GABRB3       |
| SZ_DE | CM_NO_SVA_UP_FDR_0.05 | 23543     | RBFOX2       |
| SZ_DE | CM_NO_SVA_UP_FDR_0.05 | 10154     | PLXNC1       |
| SZ_DE | CM_NO_SVA_UP_FDR_0.05 | 23394     | ADNP         |
| SZ_DE | CM_NO_SVA_UP_FDR_0.05 | 91404     | SESTD1       |
| SZ_DE | CM_NO_SVA_UP_FDR_0.05 | 57403     | RAB22A       |
| SZ_DE | CM_NO_SVA_UP_FDR_0.05 | 80124     | VCPIP1       |
| SZ_DE | CM_NO_SVA_UP_FDR_0.05 | 23210     | JMJD6        |
| SZ_DE | CM_NO_SVA_UP_FDR_0.05 | 22871     | NLGN1        |
| SZ_DE | CM_NO_SVA_UP_FDR_0.05 | 10168     | ZNF197       |
| SZ_DE | CM_NO_SVA_UP_FDR_0.05 | 284370    | ZNF615       |
| SZ_DE | CM_NO_SVA_UP_FDR_0.05 | 8715      | NOL4         |
| SZ_DE | CM_NO_SVA_UP_FDR_0.05 | 80155     | NAA15        |
| SZ_DE | CM_NO_SVA_UP_FDR_0.05 | 147339    | C18orf25     |
| SZ_DE | CM_NO_SVA_UP_FDR_0.05 | 11260     | XPOT         |
| SZ_DE | CM_NO_SVA_UP_FDR_0.05 | 7693      | ZNF134       |
| SZ_DE | CM_NO_SVA_UP_FDR_0.05 | 56986     | DTWD1        |
| SZ_DE | CM_NO_SVA_UP_FDR_0.05 | 8036      | SHOC2        |
| SZ_DE | CM_NO_SVA_UP_FDR_0.05 | 9646      | CTR9         |
| SZ_DE | CM_NO_SVA_UP_FDR_0.05 | 6049      | RNF6         |
| SZ_DE | CM_NO_SVA_UP_FDR_0.05 | 152185    | SPICE1       |
| SZ_DE | CM_NO_SVA_UP_FDR_0.05 | 10622     | POLR3G       |
| SZ_DE | CM_NO_SVA_UP_FDR_0.05 | 140767    | NRSN1        |
| SZ_DE | CM_NO_SVA_UP_FDR_0.05 | 9559      | VPS26A       |
| SZ_DE | CM_NO_SVA_UP_FDR_0.05 | 10424     | PGRMC2       |
| SZ_DE | CM_NO_SVA_UP_FDR_0.05 | 10228     | STX6         |
| SZ_DE | CM_NO_SVA_UP_FDR_0.05 | 636       | BICD1        |
| SZ_DE | CM_NO_SVA_UP_FDR_0.05 | 26052     | DNM3         |
| SZ_DE | CM_NO_SVA_UP_FDR_0.05 | 10746     | MAP3K2       |
| SZ_DE | CM_NO_SVA_UP_FDR_0.05 | 23269     | MGA          |



|       |                       |           |              |
|-------|-----------------------|-----------|--------------|
| SZ_DE | CM_NO_SVA_UP_FDR_0.05 | 144402    | CPNE8        |
| SZ_DE | CM_NO_SVA_UP_FDR_0.05 | 85464     | SSH2         |
| SZ_DE | CM_NO_SVA_UP_FDR_0.05 | 546       | ATRX         |
| SZ_DE | CM_NO_SVA_UP_FDR_0.05 | 55714     | TENM3        |
| SZ_DE | CM_NO_SVA_UP_FDR_0.05 | 6654      | SOS1         |
| SZ_DE | CM_NO_SVA_UP_FDR_0.05 | 10097     | ACTR2        |
| SZ_DE | CM_NO_SVA_UP_FDR_0.05 | 64854     | USP46        |
| SZ_DE | CM_NO_SVA_UP_FDR_0.05 | 55668     | GPATCH2L     |
| SZ_DE | CM_NO_SVA_UP_FDR_0.05 | 57551     | TAOK1        |
| SZ_DE | CM_NO_SVA_UP_FDR_0.05 | 64770     | CCDC14       |
| SZ_DE | CM_NO_SVA_UP_FDR_0.05 | 388558    | ZNF808       |
| SZ_DE | CM_NO_SVA_UP_FDR_0.05 | 84295     | PHF6         |
| SZ_DE | CM_NO_SVA_UP_FDR_0.05 | 116443    | GRIN3A       |
| SZ_DE | CM_NO_SVA_UP_FDR_0.05 | 100381270 | ZBED6        |
| SZ_DE | CM_NO_SVA_UP_FDR_0.05 | 23039     | XPO7         |
| SZ_DE | CM_NO_SVA_UP_FDR_0.05 | 4289      | MKLN1        |
| SZ_DE | CM_NO_SVA_UP_FDR_0.05 | 157807    | CLVS1        |
| SZ_DE | CM_NO_SVA_UP_FDR_0.05 | 6400      | SEL1L        |
| SZ_DE | CM_NO_SVA_UP_FDR_0.05 | 10794     | ZNF460       |
| SZ_DE | CM_NO_SVA_UP_FDR_0.05 | 56886     | UGGT1        |
| SZ_DE | CM_NO_SVA_UP_FDR_0.05 | 55532     | SLC30A10     |
| SZ_DE | CM_NO_SVA_UP_FDR_0.05 | 3837      | KPNB1        |
| SZ_DE | CM_NO_SVA_UP_FDR_0.05 | 688       | KLF5         |
| SZ_DE | CM_NO_SVA_UP_FDR_0.05 | 80223     | RAB11FIP1    |
| SZ_DE | CM_NO_SVA_UP_FDR_0.05 | 8898      | MTMR2        |
| SZ_DE | CM_NO_SVA_UP_FDR_0.05 | 9069      | CLDN12       |
| SZ_DE | CM_NO_SVA_UP_FDR_0.05 | 4084      | MXD1         |
| SZ_DE | CM_NO_SVA_UP_FDR_0.05 | 133746    | JMY          |
| SZ_DE | CM_NO_SVA_UP_FDR_0.05 | 23049     | SMG1         |
| SZ_DE | CM_NO_SVA_UP_FDR_0.05 | 26019     | UPF2         |
| SZ_DE | CM_NO_SVA_UP_FDR_0.05 | 94122     | SYTL5        |
| SZ_DE | CM_NO_SVA_UP_FDR_0.05 | 65267     | WNK3         |
| SZ_DE | CM_NO_SVA_UP_FDR_0.05 | 2005      | ELK4         |
| SZ_DE | CM_NO_SVA_UP_FDR_0.05 | 22908     | SACM1L       |
| SZ_DE | CM_NO_SVA_UP_FDR_0.05 | 23369     | PUM2         |
| SZ_DE | CM_NO_SVA_UP_FDR_0.05 | 101927455 | LOC101927455 |
| SZ_DE | CM_NO_SVA_UP_FDR_0.05 | 5494      | PPM1A        |
| SZ_DE | CM_NO_SVA_UP_FDR_0.05 | 340719    | NANOS1       |
| SZ_DE | CM_NO_SVA_UP_FDR_0.05 | 54665     | RSBN1        |
| SZ_DE | CM_NO_SVA_UP_FDR_0.05 | 5144      | PDE4D        |
| SZ_DE | CM_NO_SVA_UP_FDR_0.05 | 7110      | TMF1         |
| SZ_DE | CM_NO_SVA_UP_FDR_0.05 | 8650      | NUMB         |
| SZ_DE | CM_NO_SVA_UP_FDR_0.05 | 9734      | HDAC9        |
| SZ_DE | CM_NO_SVA_UP_FDR_0.05 | 3763      | KCNJ6        |
| SZ_DE | CM_NO_SVA_UP_FDR_0.05 | 1106      | CHD2         |
| SZ_DE | CM_NO_SVA_UP_FDR_0.05 | 160760    | PPTC7        |
| SZ_DE | CM_NO_SVA_UP_FDR_0.05 | 10808     | HSPH1        |
| SZ_DE | CM_NO_SVA_UP_FDR_0.05 | 79642     | ARSJ         |
| SZ_DE | CM_NO_SVA_UP_FDR_0.05 | 100507388 | LOC100507388 |
| SZ_DE | CM_NO_SVA_UP_FDR_0.05 | 2332      | FMR1         |
| SZ_DE | CM_NO_SVA_UP_FDR_0.05 | 80319     | CXXC4        |
| SZ_DE | CM_NO_SVA_UP_FDR_0.05 | 100131067 | CKMT2-AS1    |
| SZ_DE | CM_NO_SVA_UP_FDR_0.05 | 654502    | IQCJ         |
| SZ_DE | CM_NO_SVA_UP_FDR_0.05 | 23034     | SAMD4A       |
| SZ_DE | CM_NO_SVA_UP_FDR_0.05 | 8916      | HERC3        |
| SZ_DE | CM_NO_SVA_UP_FDR_0.05 | 64282     | PAPD5        |
| SZ_DE | CM_NO_SVA_UP_FDR_0.05 | 3658      | IREB2        |
| SZ_DE | CM_NO_SVA_UP_FDR_0.05 | 84125     | LRRIQ1       |

|       |                         |           |              |
|-------|-------------------------|-----------|--------------|
| SZ_DE | CM_NO_SVA_UP_FDR_0.05   | 152006    | RNF38        |
| SZ_DE | CM_NO_SVA_UP_FDR_0.05   | 22824     | HSPA4L       |
| SZ_DE | CM_NO_SVA_UP_FDR_0.05   | 8527      | DGKD         |
| SZ_DE | CM_NO_SVA_UP_FDR_0.05   | 1739      | DLG1         |
| SZ_DE | CM_NO_SVA_UP_FDR_0.05   | 79834     | PEAK1        |
| SZ_DE | CM_NO_SVA_UP_FDR_0.05   | 27125     | AFF4         |
| SZ_DE | CM_NO_SVA_UP_FDR_0.05   | 5921      | RASA1        |
| SZ_DE | CM_NO_SVA_UP_FDR_0.05   | 84552     | PARD6G       |
| SZ_DE | CM_NO_SVA_UP_FDR_0.05   | 5954      | RCN1         |
| SZ_DE | CM_NO_SVA_UP_FDR_0.05   | 56929     | FEM1C        |
| SZ_DE | CM_NO_SVA_UP_FDR_0.05   | 285636    | C5orf51      |
| SZ_DE | CM_NO_SVA_UP_FDR_0.05   | 57570     | TRMT5        |
| SZ_DE | CM_NO_SVA_UP_FDR_0.05   | 10087     | COL4A3BP     |
| SZ_DE | CM_NO_SVA_UP_FDR_0.05   | 166929    | SGMS2        |
| SZ_DE | CM_NO_SVA_UP_FDR_0.05   | 2066      | ERBB4        |
| SZ_DE | CM_NO_SVA_UP_FDR_0.05   | 57530     | CGN          |
| SZ_DE | CM_NO_SVA_UP_FDR_0.05   | 55787     | TXLNG        |
| SZ_DE | CM_NO_SVA_UP_FDR_0.05   | 1656      | DDX6         |
| SZ_DE | CM_NO_SVA_UP_FDR_0.05   | 8701      | DNAH11       |
| SZ_DE | CM_NO_SVA_UP_FDR_0.05   | 7188      | TRAF5        |
| SZ_DE | CM_NO_SVA_DOWN_FDR_0.05 | 6578      | SLCO2A1      |
| SZ_DE | CM_NO_SVA_DOWN_FDR_0.05 | 216       | ALDH1A1      |
| SZ_DE | CM_NO_SVA_DOWN_FDR_0.05 | 6988      | TCTA         |
| SZ_DE | CM_NO_SVA_DOWN_FDR_0.05 | 375704    | ENHO         |
| SZ_DE | CM_NO_SVA_DOWN_FDR_0.05 | 92241     | RCSD1        |
| SZ_DE | CM_NO_SVA_DOWN_FDR_0.05 | 63941     | NECAB3       |
| SZ_DE | CM_NO_SVA_DOWN_FDR_0.05 | 1869      | E2F1         |
| SZ_DE | CM_NO_SVA_DOWN_FDR_0.05 | 399474    | TMEM200B     |
| SZ_DE | CM_NO_SVA_DOWN_FDR_0.05 | 60495     | HPSE2        |
| SZ_DE | CM_NO_SVA_DOWN_FDR_0.05 | 55806     | HR           |
| SZ_DE | CM_NO_SVA_DOWN_FDR_0.05 | 84572     | GNPTG        |
| SZ_DE | CM_NO_SVA_DOWN_FDR_0.05 | 10234     | LRRC17       |
| SZ_DE | CM_NO_SVA_DOWN_FDR_0.05 | 11152     | WDR45        |
| SZ_DE | CM_NO_SVA_DOWN_FDR_0.05 | 5192      | PEX10        |
| SZ_DE | CM_NO_SVA_DOWN_FDR_0.05 | 148198    | ZNF98        |
| SZ_DE | CM_NO_SVA_DOWN_FDR_0.05 | 10266     | RAMP2        |
| SZ_DE | CM_NO_SVA_DOWN_FDR_0.05 | 56917     | MEIS3        |
| SZ_DE | CM_NO_SVA_DOWN_FDR_0.05 | 50509     | COL5A3       |
| SZ_DE | CM_NO_SVA_DOWN_FDR_0.05 | 818       | CAMK2G       |
| SZ_DE | CM_NO_SVA_DOWN_FDR_0.05 | 5502      | PPP1R1A      |
| SZ_DE | CM_NO_SVA_DOWN_FDR_0.05 | 3481      | IGF2         |
| SZ_DE | CM_NO_SVA_DOWN_FDR_0.05 | 55317     | AP5S1        |
| SZ_DE | CM_NO_SVA_DOWN_FDR_0.05 | 8912      | CACNA1H      |
| SZ_DE | CM_NO_SVA_DOWN_FDR_0.05 | 762       | CA4          |
| SZ_DE | CM_NO_SVA_DOWN_FDR_0.05 | 79041     | TMEM38A      |
| SZ_DE | CM_NO_SVA_DOWN_FDR_0.05 | 5409      | PNMT         |
| SZ_DE | CM_NO_SVA_DOWN_FDR_0.05 | 6324      | SCN1B        |
| SZ_DE | CM_NO_SVA_DOWN_FDR_0.05 | 100133669 | LOC100133669 |
| SZ_DE | CM_NO_SVA_DOWN_FDR_0.05 | 2038      | EPB42        |
| SZ_DE | CM_NO_SVA_DOWN_FDR_0.05 | 572       | BAD          |
| SZ_DE | CM_NO_SVA_DOWN_FDR_0.05 | 53342     | IL17D        |
| SZ_DE | CM_NO_SVA_DOWN_FDR_0.05 | 79095     | C9orf16      |
| SZ_DE | CM_NO_SVA_DOWN_FDR_0.05 | 50649     | ARHGEF4      |
| SZ_DE | CM_NO_SVA_DOWN_FDR_0.05 | 8482      | SEMA7A       |
| SZ_DE | CM_NO_SVA_DOWN_FDR_0.05 | 255275    | MYADML2      |
| SZ_DE | CM_NO_SVA_DOWN_FDR_0.05 | 170463    | SSBP4        |
| SZ_DE | CM_NO_SVA_DOWN_FDR_0.05 | 79785     | RERGL        |
| SZ_DE | CM_NO_SVA_DOWN_FDR_0.05 | 23541     | SEC14L2      |

|       |                         |           |               |
|-------|-------------------------|-----------|---------------|
| SZ_DE | CM_NO_SVA_DOWN_FDR_0.05 | 65988     | ZNF747        |
| SZ_DE | CM_NO_SVA_DOWN_FDR_0.05 | 152002    | XXYL1         |
| SZ_DE | CM_NO_SVA_DOWN_FDR_0.05 | 7123      | CLEC3B        |
| SZ_DE | CM_NO_SVA_DOWN_FDR_0.05 | 51257     | MARCH2        |
| SZ_DE | CM_NO_SVA_DOWN_FDR_0.05 | 574036    | SERTAD4-AS1   |
| SZ_DE | CM_NO_SVA_DOWN_FDR_0.05 | 1160      | CKMT2         |
| SZ_DE | CM_NO_SVA_DOWN_FDR_0.05 | 8835      | SOCS2         |
| SZ_DE | CM_NO_SVA_DOWN_FDR_0.05 | 8986      | RPS6KA4       |
| SZ_DE | CM_NO_SVA_DOWN_FDR_0.05 | 79947     | DHDDS         |
| SZ_DE | CM_NO_SVA_DOWN_FDR_0.05 | 89958     | SAPCD2        |
| SZ_DE | CM_NO_SVA_DOWN_FDR_0.05 | 56961     | SHD           |
| SZ_DE | CM_NO_SVA_DOWN_FDR_0.05 | 55152     | DALRD3        |
| SZ_DE | CM_NO_SVA_DOWN_FDR_0.05 | 254295    | PHYHD1        |
| SZ_DE | CM_NO_SVA_DOWN_FDR_0.05 | 84681     | HINT2         |
| SZ_DE | CM_NO_SVA_DOWN_FDR_0.05 | 10023     | FRAT1         |
| SZ_DE | CM_NO_SVA_DOWN_FDR_0.05 | 55588     | MED29         |
| SZ_DE | CM_NO_SVA_DOWN_FDR_0.05 | 56603     | CYP26B1       |
| SZ_DE | CM_NO_SVA_DOWN_FDR_0.05 | 2261      | FGFR3         |
| SZ_DE | CM_NO_SVA_DOWN_FDR_0.05 | 54776     | PPP1R12C      |
| SZ_DE | CM_NO_SVA_DOWN_FDR_0.05 | 2155      | F7            |
| SZ_DE | CM_NO_SVA_DOWN_FDR_0.05 | 126792    | B3GALT6       |
| SZ_DE | CM_NO_SVA_DOWN_FDR_0.05 | 283871    | PGP           |
| SZ_DE | CM_NO_SVA_DOWN_FDR_0.05 | 112464    | PRKCDBP       |
| SZ_DE | CM_NO_SVA_DOWN_FDR_0.05 | 9377      | COX5A         |
| SZ_DE | CM_NO_SVA_DOWN_FDR_0.05 | 10814     | CPLX2         |
| SZ_DE | CM_NO_SVA_DOWN_FDR_0.05 | 768096    | HAR1A         |
| SZ_DE | CM_NO_SVA_DOWN_FDR_0.05 | 253868    | C20orf166-AS1 |
| SZ_DE | CM_NO_SVA_DOWN_FDR_0.05 | 64759     | TNS3          |
| SZ_DE | CM_NO_SVA_DOWN_FDR_0.05 | 100507437 | LOC100507437  |
| SZ_DE | CM_NO_SVA_DOWN_FDR_0.05 | 116835    | HSPA12B       |
| SZ_DE | CM_NO_SVA_DOWN_FDR_0.05 | 25870     | SUMF2         |
| SZ_DE | CM_NO_SVA_DOWN_FDR_0.05 | 284312    | ZSCAN1        |
| SZ_DE | CM_NO_SVA_DOWN_FDR_0.05 | 27077     | B9D1          |
| SZ_DE | CM_NO_SVA_DOWN_FDR_0.05 | 4636      | MYL5          |
| SZ_DE | CM_NO_SVA_DOWN_FDR_0.05 | 2047      | EPHB1         |
| SZ_DE | CM_NO_SVA_DOWN_FDR_0.05 | 80199     | FUZ           |
| SZ_DE | CM_NO_SVA_DOWN_FDR_0.05 | 79006     | METRNL        |
| SZ_DE | CM_NO_SVA_DOWN_FDR_0.05 | 283130    | SLC25A45      |
| SZ_DE | CM_NO_SVA_DOWN_FDR_0.05 | 138429    | PIP5K1L       |
| SZ_DE | CM_NO_SVA_DOWN_FDR_0.05 | 375775    | PNPLA7        |
| SZ_DE | CM_NO_SVA_DOWN_FDR_0.05 | 8705      | B3GALT4       |
| SZ_DE | CM_NO_SVA_DOWN_FDR_0.05 | 10120     | ACTR1B        |
| SZ_DE | CM_NO_SVA_DOWN_FDR_0.05 | 7138      | TNNT1         |
| SZ_DE | CM_NO_SVA_DOWN_FDR_0.05 | 10485     | C1orf61       |
| SZ_DE | CM_NO_SVA_DOWN_FDR_0.05 | 129804    | FBLN7         |
| SZ_DE | CM_NO_SVA_DOWN_FDR_0.05 | 6881      | TAF10         |
| SZ_DE | CM_NO_SVA_DOWN_FDR_0.05 | 7264      | TSTA3         |
| SZ_DE | CM_NO_SVA_DOWN_FDR_0.05 | 79180     | EFHD2         |
| SZ_DE | CM_NO_SVA_DOWN_FDR_0.05 | 11331     | PHB2          |
| SZ_DE | CM_NO_SVA_DOWN_FDR_0.05 | 56953     | NT5M          |
| SZ_DE | CM_NO_SVA_DOWN_FDR_0.05 | 1346      | COX7A1        |
| SZ_DE | CM_NO_SVA_DOWN_FDR_0.05 | 10361     | NPM2          |
| SZ_DE | CM_NO_SVA_DOWN_FDR_0.05 | 57348     | TTYH1         |
| SZ_DE | CM_NO_SVA_DOWN_FDR_0.05 | 2067      | ERCC1         |
| SZ_DE | CM_NO_SVA_DOWN_FDR_0.05 | 57447     | NDRG2         |
| SZ_DE | CM_NO_SVA_DOWN_FDR_0.05 | 9088      | PKMYT1        |
| SZ_DE | CM_NO_SVA_DOWN_FDR_0.05 | 755       | C21orf2       |
| SZ_DE | CM_NO_SVA_DOWN_FDR_0.05 | 122616    | C14orf79      |

|       |                         |           |            |
|-------|-------------------------|-----------|------------|
| SZ_DE | CM_NO_SVA_DOWN_FDR_0.05 | 389084    | C2orf82    |
| SZ_DE | CM_NO_SVA_DOWN_FDR_0.05 | 65078     | RTN4R      |
| SZ_DE | CM_NO_SVA_DOWN_FDR_0.05 | 26268     | FBXO9      |
| SZ_DE | CM_NO_SVA_DOWN_FDR_0.05 | 8303      | SNN        |
| SZ_DE | CM_NO_SVA_DOWN_FDR_0.05 | 100192379 | PP12613    |
| SZ_DE | CM_NO_SVA_DOWN_FDR_0.05 | 391356    | PTRHD1     |
| SZ_DE | CM_NO_SVA_DOWN_FDR_0.05 | 84817     | TXNDC17    |
| SZ_DE | CM_NO_SVA_DOWN_FDR_0.05 | 26873     | OPLAH      |
| SZ_DE | CM_NO_SVA_DOWN_FDR_0.05 | 83547     | RILP       |
| SZ_DE | CM_NO_SVA_DOWN_FDR_0.05 | 25864     | ABHD14A    |
| SZ_DE | CM_NO_SVA_DOWN_FDR_0.05 | 64838     | FNDC4      |
| SZ_DE | CM_NO_SVA_DOWN_FDR_0.05 | 339674    | LINC00634  |
| SZ_DE | CM_NO_SVA_DOWN_FDR_0.05 | 84304     | NUDT22     |
| SZ_DE | CM_NO_SVA_DOWN_FDR_0.05 | 3489      | IGFBP6     |
| SZ_DE | CM_NO_SVA_DOWN_FDR_0.05 | 51550     | CINP       |
| SZ_DE | CM_NO_SVA_DOWN_FDR_0.05 | 56848     | SPHK2      |
| SZ_DE | CM_NO_SVA_DOWN_FDR_0.05 | 79873     | NUDT18     |
| SZ_DE | CM_NO_SVA_DOWN_FDR_0.05 | 124936    | CYB5D2     |
| SZ_DE | CM_NO_SVA_DOWN_FDR_0.05 | 56920     | SEMA3G     |
| SZ_DE | CM_NO_SVA_DOWN_FDR_0.05 | 503693    | LOH12CR2   |
| SZ_DE | CM_NO_SVA_DOWN_FDR_0.05 | 6640      | SNTA1      |
| SZ_DE | CM_NO_SVA_DOWN_FDR_0.05 | 23205     | ACSBG1     |
| SZ_DE | CM_NO_SVA_DOWN_FDR_0.05 | 1351      | COX8A      |
| SZ_DE | CM_NO_SVA_DOWN_FDR_0.05 | 90203     | SNX21      |
| SZ_DE | CM_NO_SVA_DOWN_FDR_0.05 | 55257     | MRGBP      |
| SZ_DE | CM_NO_SVA_DOWN_FDR_0.05 | 347734    | SLC35B2    |
| SZ_DE | CM_NO_SVA_DOWN_FDR_0.05 | 84993     | UBL7       |
| SZ_DE | CM_NO_SVA_DOWN_FDR_0.05 | 9283      | GPR37L1    |
| SZ_DE | CM_NO_SVA_DOWN_FDR_0.05 | 154790    | CLEC2L     |
| SZ_DE | CM_NO_SVA_DOWN_FDR_0.05 | 845       | CASQ2      |
| SZ_DE | CM_NO_SVA_DOWN_FDR_0.05 | 6538      | SLC6A11    |
| SZ_DE | CM_NO_SVA_DOWN_FDR_0.05 | 5264      | PHYH       |
| SZ_DE | CM_NO_SVA_DOWN_FDR_0.05 | 51308     | REEP2      |
| SZ_DE | CM_NO_SVA_DOWN_FDR_0.05 | 6540      | SLC6A13    |
| SZ_DE | CM_NO_SVA_DOWN_FDR_0.05 | 151835    | CPNE9      |
| SZ_DE | CM_NO_SVA_DOWN_FDR_0.05 | 11316     | COPE       |
| SZ_DE | CM_NO_SVA_DOWN_FDR_0.05 | 9715      | FAM131B    |
| SZ_DE | CM_NO_SVA_DOWN_FDR_0.05 | 159371    | SLC35G1    |
| SZ_DE | CM_NO_SVA_DOWN_FDR_0.05 | 51162     | EGFL7      |
| SZ_DE | CM_NO_SVA_DOWN_FDR_0.05 | 79754     | ASB13      |
| SZ_DE | CM_NO_SVA_DOWN_FDR_0.05 | 65094     | JMJD4      |
| SZ_DE | CM_NO_SVA_DOWN_FDR_0.05 | 92305     | TMEM129    |
| SZ_DE | CM_NO_SVA_DOWN_FDR_0.05 | 64320     | RNF25      |
| SZ_DE | CM_NO_SVA_DOWN_FDR_0.05 | 1072      | CFL1       |
| SZ_DE | CM_NO_SVA_DOWN_FDR_0.05 | 5127      | CDK16      |
| SZ_DE | CM_NO_SVA_DOWN_FDR_0.05 | 23138     | N4BP3      |
| SZ_DE | CM_NO_SVA_DOWN_FDR_0.05 | 93058     | COQ10A     |
| SZ_DE | CM_NO_SVA_DOWN_FDR_0.05 | 10815     | CPLX1      |
| SZ_DE | CM_NO_SVA_DOWN_FDR_0.05 | 192668    | CYS1       |
| SZ_DE | CM_NO_SVA_DOWN_FDR_0.05 | 9452      | ITM2A      |
| SZ_DE | CM_NO_SVA_DOWN_FDR_0.05 | 2788      | GNG7       |
| SZ_DE | CM_NO_SVA_DOWN_FDR_0.05 | 10445     | MCRS1      |
| SZ_DE | CM_NO_SVA_DOWN_FDR_0.05 | 114984    | FLYWCH2    |
| SZ_DE | CM_NO_SVA_DOWN_FDR_0.05 | 55004     | LAMTOR1    |
| SZ_DE | CM_NO_SVA_DOWN_FDR_0.05 | 1397      | CRIP2      |
| SZ_DE | CM_NO_SVA_DOWN_FDR_0.05 | 101410534 | DLGAP1-AS4 |
| SZ_DE | CM_NO_SVA_DOWN_FDR_0.05 | 51621     | KLF13      |
| SZ_DE | CM_NO_SVA_DOWN_FDR_0.05 | 284358    | MAMSTR     |

|       |                         |           |            |
|-------|-------------------------|-----------|------------|
| SZ_DE | CM_NO_SVA_DOWN_FDR_0.05 | 3338      | DNAJC4     |
| SZ_DE | CM_NO_SVA_DOWN_FDR_0.05 | 85452     | KIAA1751   |
| SZ_DE | CM_NO_SVA_DOWN_FDR_0.05 | 284076    | TLL6       |
| SZ_DE | CM_NO_SVA_DOWN_FDR_0.05 | 64236     | PDLIM2     |
| SZ_DE | CM_NO_SVA_DOWN_FDR_0.05 | 339789    | LINC00299  |
| SZ_DE | CM_NO_SVA_DOWN_FDR_0.05 | 5662      | PSD        |
| SZ_DE | CM_NO_SVA_DOWN_FDR_0.05 | 293       | SLC25A6    |
| SZ_DE | CM_NO_SVA_DOWN_FDR_0.05 | 169270    | ZNF596     |
| SZ_DE | CM_NO_SVA_DOWN_FDR_0.05 | 1135      | CHRNA2     |
| SZ_DE | CM_NO_SVA_DOWN_FDR_0.05 | 100507589 | NAGPA-AS1  |
| SZ_DE | CM_NO_SVA_DOWN_FDR_0.05 | 8525      | DGKZ       |
| SZ_DE | CM_NO_SVA_DOWN_FDR_0.05 | 66004     | LYNX1      |
| SZ_DE | CM_NO_SVA_DOWN_FDR_0.05 | 84276     | NICN1      |
| SZ_DE | CM_NO_SVA_DOWN_FDR_0.05 | 6271      | S100A1     |
| SZ_DE | CM_NO_SVA_DOWN_FDR_0.05 | 1465      | CSRP1      |
| SZ_DE | CM_NO_SVA_DOWN_FDR_0.05 | 66035     | SLC2A11    |
| SZ_DE | CM_NO_SVA_DOWN_FDR_0.05 | 285126    | DNAJC5G    |
| SZ_DE | CM_NO_SVA_DOWN_FDR_0.05 | 9244      | CRLF1      |
| SZ_DE | CM_NO_SVA_DOWN_FDR_0.05 | 387640    | SKIDA1     |
| SZ_DE | CM_NO_SVA_DOWN_FDR_0.05 | 64925     | CCDC71     |
| SZ_DE | CM_NO_SVA_DOWN_FDR_0.05 | 138311    | FAM69B     |
| SZ_DE | CM_NO_SVA_DOWN_FDR_0.05 | 1774      | DNASE1L1   |
| SZ_DE | CM_NO_SVA_DOWN_FDR_0.05 | 162427    | FAM134C    |
| SZ_DE | CM_NO_SVA_DOWN_FDR_0.05 | 6948      | TCN2       |
| SZ_DE | CM_NO_SVA_DOWN_FDR_0.05 | 25854     | FAM149A    |
| SZ_DE | CM_NO_SVA_DOWN_FDR_0.05 | 84275     | SLC25A33   |
| SZ_DE | CM_NO_SVA_DOWN_FDR_0.05 | 5878      | RAB5C      |
| SZ_DE | CM_NO_SVA_DOWN_FDR_0.05 | 79412     | KREMEN2    |
| SZ_DE | CM_NO_SVA_DOWN_FDR_0.05 | 138162    | C9orf116   |
| SZ_DE | CM_NO_SVA_DOWN_FDR_0.05 | 5625      | PRODH      |
| SZ_DE | CM_NO_SVA_DOWN_FDR_0.05 | 128439    | SNHG11     |
| SZ_DE | CM_NO_SVA_DOWN_FDR_0.05 | 85442     | KNDC1      |
| SZ_DE | CM_NO_SVA_DOWN_FDR_0.05 | 54587     | MXRA8      |
| SZ_DE | CM_NO_SVA_DOWN_FDR_0.05 | 150383    | CDPF1      |
| SZ_DE | CM_NO_SVA_DOWN_FDR_0.05 | 6624      | FSCN1      |
| SZ_DE | CM_NO_SVA_DOWN_FDR_0.05 | 64743     | WDR13      |
| SZ_DE | CM_NO_SVA_DOWN_FDR_0.05 | 105       | ADARB2     |
| SZ_DE | CM_NO_SVA_DOWN_FDR_0.05 | 84152     | PPP1R1B    |
| SZ_DE | CM_NO_SVA_DOWN_FDR_0.05 | 29086     | BABAM1     |
| SZ_DE | CM_NO_SVA_DOWN_FDR_0.05 | 129787    | TMEM18     |
| SZ_DE | CM_NO_SVA_DOWN_FDR_0.05 | 79671     | NLRX1      |
| SZ_DE | CM_NO_SVA_DOWN_FDR_0.05 | 10522     | DEAF1      |
| SZ_DE | CM_NO_SVA_DOWN_FDR_0.05 | 10400     | PEMT       |
| SZ_DE | CM_NO_SVA_DOWN_FDR_0.05 | 63905     | MANBAL     |
| SZ_DE | CM_NO_SVA_DOWN_FDR_0.05 | 91252     | SLC39A13   |
| SZ_DE | CM_NO_SVA_DOWN_FDR_0.05 | 122970    | ACOT4      |
| SZ_DE | CM_NO_SVA_DOWN_FDR_0.05 | 5201      | PFDN1      |
| SZ_DE | CM_NO_SVA_DOWN_FDR_0.05 | 30815     | ST6GALNAC6 |
| SZ_DE | CM_NO_SVA_DOWN_FDR_0.05 | 286336    | FAM78A     |
| SZ_DE | CM_NO_SVA_DOWN_FDR_0.05 | 84532     | ACSS1      |
| SZ_DE | CM_NO_SVA_DOWN_FDR_0.05 | 148641    | SLC35F3    |
| SZ_DE | CM_NO_SVA_DOWN_FDR_0.05 | 94160     | ABCC12     |
| SZ_DE | CM_NO_SVA_DOWN_FDR_0.05 | 347862    | PDDC1      |
| SZ_DE | CM_NO_SVA_DOWN_FDR_0.05 | 64792     | RABL5      |
| SZ_DE | CM_NO_SVA_DOWN_FDR_0.05 | 54982     | CLN6       |
| SZ_DE | CM_NO_SVA_DOWN_FDR_0.05 | 54884     | RETSAT     |
| SZ_DE | CM_NO_SVA_DOWN_FDR_0.05 | 285368    | PRRT3      |
| SZ_DE | CM_NO_SVA_DOWN_FDR_0.05 | 5859      | QARS       |

|       |                         |           |           |
|-------|-------------------------|-----------|-----------|
| SZ_DE | CM_NO_SVA_DOWN_FDR_0.05 | 80775     | TMEM177   |
| SZ_DE | CM_NO_SVA_DOWN_FDR_0.05 | 363       | AQP6      |
| SZ_DE | CM_NO_SVA_DOWN_FDR_0.05 | 100507206 | LINC00943 |
| SZ_DE | CM_NO_SVA_DOWN_FDR_0.05 | 10460     | TACC3     |
| SZ_DE | CM_NO_SVA_DOWN_FDR_0.05 | 285193    | DUSP28    |
| SZ_DE | CM_NO_SVA_DOWN_FDR_0.05 | 3698      | ITIH2     |
| SZ_DE | CM_NO_SVA_DOWN_FDR_0.05 | 168391    | GALNTL5   |
| SZ_DE | CM_NO_SVA_DOWN_FDR_0.05 | 9957      | HS3ST1    |
| SZ_DE | CM_NO_SVA_DOWN_FDR_0.05 | 8646      | CHRD      |
| SZ_DE | CM_NO_SVA_DOWN_FDR_0.05 | 6687      | SPG7      |
| SZ_DE | CM_NO_SVA_DOWN_FDR_0.05 | 90485     | ZNF835    |
| SZ_DE | CM_NO_SVA_DOWN_FDR_0.05 | 4974      | OMG       |
| SZ_DE | CM_NO_SVA_DOWN_FDR_0.05 | 441869    | ANKRD65   |
| SZ_DE | CM_NO_SVA_DOWN_FDR_0.05 | 1264      | CNN1      |
| SZ_DE | CM_NO_SVA_DOWN_FDR_0.05 | 8991      | SELENBP1  |
| SZ_DE | CM_NO_SVA_DOWN_FDR_0.05 | 150538    | SATB2-AS1 |
| SZ_DE | CM_NO_SVA_DOWN_FDR_0.05 | 161198    | CLEC14A   |
| SZ_DE | CM_NO_SVA_DOWN_FDR_0.05 | 654429    | LRTM2     |
| SZ_DE | CM_NO_SVA_DOWN_FDR_0.05 | 57799     | RAB40C    |
| SZ_DE | CM_NO_SVA_DOWN_FDR_0.05 | 94097     | SFXN5     |
| SZ_DE | CM_NO_SVA_DOWN_FDR_0.05 | 192286    | HIGD2A    |
| SZ_DE | CM_NO_SVA_DOWN_FDR_0.05 | 83444     | INO80B    |
| SZ_DE | CM_NO_SVA_DOWN_FDR_0.05 | 65996     | MGC2752   |
| SZ_DE | CM_NO_SVA_DOWN_FDR_0.05 | 283999    | TMEM235   |
| SZ_DE | CM_NO_SVA_DOWN_FDR_0.05 | 254359    | ZDHHC24   |
| SZ_DE | CM_NO_SVA_DOWN_FDR_0.05 | 11285     | B4GALT7   |
| SZ_DE | CM_NO_SVA_DOWN_FDR_0.05 | 9638      | FEZ1      |
| SZ_DE | CM_NO_SVA_DOWN_FDR_0.05 | 4185      | ADAM11    |
| SZ_DE | CM_NO_SVA_DOWN_FDR_0.05 | 2647      | BLOC1S1   |
| SZ_DE | CM_NO_SVA_DOWN_FDR_0.05 | 83482     | SCRT1     |
| SZ_DE | CM_NO_SVA_DOWN_FDR_0.05 | 9588      | PRDX6     |
| SZ_DE | CM_NO_SVA_DOWN_FDR_0.05 | 3664      | IRF6      |
| SZ_DE | CM_NO_SVA_DOWN_FDR_0.05 | 51706     | CYB5R1    |
| SZ_DE | CM_NO_SVA_DOWN_FDR_0.05 | 388135    | C15orf59  |
| SZ_DE | CM_NO_SVA_DOWN_FDR_0.05 | 28974     | C19orf53  |
| SZ_DE | CM_NO_SVA_DOWN_FDR_0.05 | 51693     | TRAPPC2L  |
| SZ_DE | CM_NO_SVA_DOWN_FDR_0.05 | 10999     | SLC27A4   |
| SZ_DE | CM_NO_SVA_DOWN_FDR_0.05 | 388341    | FAM211A   |
| SZ_DE | CM_NO_SVA_DOWN_FDR_0.05 | 29882     | ANAPC2    |
| SZ_DE | CM_NO_SVA_DOWN_FDR_0.05 | 25900     | IFFO1     |
| SZ_DE | CM_NO_SVA_DOWN_FDR_0.05 | 1468      | SLC25A10  |
| SZ_DE | CM_NO_SVA_DOWN_FDR_0.05 | 6035      | RNASE1    |
| SZ_DE | CM_NO_SVA_DOWN_FDR_0.05 | 2826      | CCR10     |
| SZ_DE | CM_NO_SVA_DOWN_FDR_0.05 | 100128822 | LINC01003 |
| SZ_DE | CM_NO_SVA_DOWN_FDR_0.05 | 379       | ARL4D     |
| SZ_DE | CM_NO_SVA_DOWN_FDR_0.05 | 5605      | MAP2K2    |
| SZ_DE | CM_NO_SVA_DOWN_FDR_0.05 | 25989     | ULK3      |
| SZ_DE | CM_NO_SVA_DOWN_FDR_0.05 | 2582      | GALE      |
| SZ_DE | CM_NO_SVA_DOWN_FDR_0.05 | 9526      | MPDU1     |
| SZ_DE | CM_NO_SVA_DOWN_FDR_0.05 | 3418      | IDH2      |
| SZ_DE | CM_NO_SVA_DOWN_FDR_0.05 | 1289      | COL5A1    |
| SZ_DE | CM_NO_SVA_DOWN_FDR_0.05 | 56954     | NIT2      |
| SZ_DE | CM_NO_SVA_DOWN_FDR_0.05 | 10268     | RAMP3     |
| SZ_DE | CM_NO_SVA_DOWN_FDR_0.05 | 2879      | GPX4      |
| SZ_DE | CM_NO_SVA_DOWN_FDR_0.05 | 9836      | LCMT2     |
| SZ_DE | CM_NO_SVA_DOWN_FDR_0.05 | 183       | AGT       |
| SZ_DE | CM_NO_SVA_DOWN_FDR_0.05 | 254559    | LINC00925 |
| SZ_DE | CM_NO_SVA_DOWN_FDR_0.05 | 114926    | SMIM19    |

|       |                         |           |            |
|-------|-------------------------|-----------|------------|
| SZ_DE | CM_NO_SVA_DOWN_FDR_0.05 | 11243     | PMF1       |
| SZ_DE | CM_NO_SVA_DOWN_FDR_0.05 | 65263     | PYCRL      |
| SZ_DE | CM_NO_SVA_DOWN_FDR_0.05 | 6415      | SEPW1      |
| SZ_DE | CM_NO_SVA_DOWN_FDR_0.05 | 2702      | GJA5       |
| SZ_DE | CM_NO_SVA_DOWN_FDR_0.05 | 1298      | COL9A2     |
| SZ_DE | CM_NO_SVA_DOWN_FDR_0.05 | 23457     | ABCB9      |
| SZ_DE | CM_NO_SVA_DOWN_FDR_0.05 | 92745     | SLC38A5    |
| SZ_DE | CM_NO_SVA_DOWN_FDR_0.05 | 51024     | FIS1       |
| SZ_DE | CM_NO_SVA_DOWN_FDR_0.05 | 51281     | ANKMY1     |
| SZ_DE | CM_NO_SVA_DOWN_FDR_0.05 | 128218    | TMEM125    |
| SZ_DE | CM_NO_SVA_DOWN_FDR_0.05 | 4005      | LMO2       |
| SZ_DE | CM_NO_SVA_DOWN_FDR_0.05 | 80148     | PQLC1      |
| SZ_DE | CM_NO_SVA_DOWN_FDR_0.05 | 115992    | RNF166     |
| SZ_DE | CM_NO_SVA_DOWN_FDR_0.05 | 1132      | CHRM4      |
| SZ_DE | CM_NO_SVA_DOWN_FDR_0.05 | 7923      | HSD17B8    |
| SZ_DE | CM_NO_SVA_DOWN_FDR_0.05 | 84279     | PRADC1     |
| SZ_DE | CM_NO_SVA_DOWN_FDR_0.05 | 5871      | MAP4K2     |
| SZ_DE | CM_NO_SVA_DOWN_FDR_0.05 | 1299      | COL9A3     |
| SZ_DE | CM_NO_SVA_DOWN_FDR_0.05 | 25946     | ZNF385A    |
| SZ_DE | CM_NO_SVA_DOWN_FDR_0.05 | 28988     | DBNL       |
| SZ_DE | CM_NO_SVA_DOWN_FDR_0.05 | 2356      | FPGS       |
| SZ_DE | CM_NO_SVA_DOWN_FDR_0.05 | 115708    | TRMT61A    |
| SZ_DE | CM_NO_SVA_DOWN_FDR_0.05 | 249       | ALPL       |
| SZ_DE | CM_NO_SVA_DOWN_FDR_0.05 | 100506779 | BZRAP1-AS1 |
| SZ_DE | CM_NO_SVA_DOWN_FDR_0.05 | 738       | VPS51      |
| SZ_DE | CM_NO_SVA_DOWN_FDR_0.05 | 54681     | P4HTM      |
| SZ_DE | CM_NO_SVA_DOWN_FDR_0.05 | 246330    | PELI3      |
| SZ_DE | CM_NO_SVA_DOWN_FDR_0.05 | 6404      | SELPLG     |
| SZ_DE | CM_NO_SVA_DOWN_FDR_0.05 | 84269     | CHCHD5     |
| SZ_DE | CM_NO_SVA_DOWN_FDR_0.05 | 252995    | FNDC5      |
| SZ_DE | CM_NO_SVA_DOWN_FDR_0.05 | 260434    | PYDC1      |
| SZ_DE | CM_NO_SVA_DOWN_FDR_0.05 | 9127      | P2RX6      |
| SZ_DE | CM_NO_SVA_DOWN_FDR_0.05 | 23770     | FKBP8      |
| SZ_DE | CM_NO_SVA_DOWN_FDR_0.05 | 7965      | AIMP2      |
| SZ_DE | CM_NO_SVA_DOWN_FDR_0.05 | 9905      | SGSM2      |
| SZ_DE | CM_NO_SVA_DOWN_FDR_0.05 | 55663     | ZNF446     |
| SZ_DE | CM_NO_SVA_DOWN_FDR_0.05 | 27089     | UQCRC      |
| SZ_DE | CM_NO_SVA_DOWN_FDR_0.05 | 90187     | EMILIN3    |
| SZ_DE | CM_NO_SVA_DOWN_FDR_0.05 | 56904     | SH3GLB2    |
| SZ_DE | CM_NO_SVA_DOWN_FDR_0.05 | 79590     | MRPL24     |
| SZ_DE | CM_NO_SVA_DOWN_FDR_0.05 | 90990     | KIFC2      |
| SZ_DE | CM_NO_SVA_DOWN_FDR_0.05 | 85378     | TUBGCP6    |
| SZ_DE | CM_NO_SVA_DOWN_FDR_0.05 | 90024     | FLJ20021   |
| SZ_DE | CM_NO_SVA_DOWN_FDR_0.05 | 1149      | CIDEA      |
| SZ_DE | CM_NO_SVA_DOWN_FDR_0.05 | 149345    | SHISA4     |
| SZ_DE | CM_NO_SVA_DOWN_FDR_0.05 | 64419     | MTMR14     |
| SZ_DE | CM_NO_SVA_DOWN_FDR_0.05 | 80142     | PTGES2     |
| SZ_DE | CM_NO_SVA_DOWN_FDR_0.05 | 55851     | PSENE1     |
| SZ_DE | CM_NO_SVA_DOWN_FDR_0.05 | 8704      | B4GALT2    |
| SZ_DE | CM_NO_SVA_DOWN_FDR_0.05 | 6320      | CLEC11A    |
| SZ_DE | CM_NO_SVA_DOWN_FDR_0.05 | 3671      | ISLR       |
| SZ_DE | CM_NO_SVA_DOWN_FDR_0.05 | 474344    | GIMAP6     |
| SZ_DE | CM_NO_SVA_DOWN_FDR_0.05 | 284111    | SLC13A5    |
| SZ_DE | CM_NO_SVA_DOWN_FDR_0.05 | 116349    | C5orf55    |
| SZ_DE | CM_NO_SVA_DOWN_FDR_0.05 | 5524      | PPP2R4     |
| SZ_DE | CM_NO_SVA_DOWN_FDR_0.05 | 387775    | SLC22A10   |
| SZ_DE | CM_NO_SVA_DOWN_FDR_0.05 | 2987      | GUK1       |
| SZ_DE | CM_NO_SVA_DOWN_FDR_0.05 | 84628     | NTNG2      |

|       |                         |        |            |
|-------|-------------------------|--------|------------|
| SZ_DE | CM_NO_SVA_DOWN_FDR_0.05 | 89932  | PAPLN      |
| SZ_DE | CM_NO_SVA_DOWN_FDR_0.05 | 54461  | FBXW5      |
| SZ_DE | CM_NO_SVA_DOWN_FDR_0.05 | 113791 | PIK3IP1    |
| SZ_DE | CM_NO_SVA_DOWN_FDR_0.05 | 631    | BFSP1      |
| SZ_DE | CM_NO_SVA_DOWN_FDR_0.05 | 2134   | EXTL1      |
| SZ_DE | CM_NO_SVA_DOWN_FDR_0.05 | 57795  | BRINP2     |
| SZ_DE | CM_NO_SVA_DOWN_FDR_0.05 | 55652  | SLC48A1    |
| SZ_DE | CM_NO_SVA_DOWN_FDR_0.05 | 253982 | ASPHD1     |
| SZ_DE | CM_NO_SVA_DOWN_FDR_0.05 | 129807 | NEU4       |
| SZ_DE | CM_NO_SVA_DOWN_FDR_0.05 | 25906  | ANAPC15    |
| SZ_DE | CM_NO_SVA_DOWN_FDR_0.05 | 2954   | GSTZ1      |
| SZ_DE | CM_NO_SVA_DOWN_FDR_0.05 | 348751 | FTCDNL1    |
| SZ_DE | CM_NO_SVA_DOWN_FDR_0.05 | 80737  | VWA7       |
| SZ_DE | CM_NO_SVA_DOWN_FDR_0.05 | 22845  | DOLK       |
| SZ_DE | CM_NO_SVA_DOWN_FDR_0.05 | 1307   | COL16A1    |
| SZ_DE | CM_NO_SVA_DOWN_FDR_0.05 | 576    | BAI2       |
| SZ_DE | CM_NO_SVA_DOWN_FDR_0.05 | 57128  | LYRM4      |
| SZ_DE | CM_NO_SVA_DOWN_FDR_0.05 | 128240 | APOA1BP    |
| SZ_DE | CM_NO_SVA_DOWN_FDR_0.05 | 6231   | RPS26      |
| SZ_DE | CM_NO_SVA_DOWN_FDR_0.05 | 55808  | ST6GALNAC1 |
| SZ_DE | CM_NO_SVA_DOWN_FDR_0.05 | 8861   | LDB1       |
| SZ_DE | CM_NO_SVA_DE_FDR_0.05   | 6335   | SCN9A      |
| SZ_DE | CM_NO_SVA_DE_FDR_0.05   | 389206 | BEND4      |
| SZ_DE | CM_NO_SVA_DE_FDR_0.05   | 80055  | PGAP1      |
| SZ_DE | CM_NO_SVA_DE_FDR_0.05   | 6870   | TACR3      |
| SZ_DE | CM_NO_SVA_DE_FDR_0.05   | 55103  | RALGPS2    |
| SZ_DE | CM_NO_SVA_DE_FDR_0.05   | 22881  | ANKRD6     |
| SZ_DE | CM_NO_SVA_DE_FDR_0.05   | 285513 | GPRIN3     |
| SZ_DE | CM_NO_SVA_DE_FDR_0.05   | 80014  | WWC2       |
| SZ_DE | CM_NO_SVA_DE_FDR_0.05   | 5991   | RFX3       |
| SZ_DE | CM_NO_SVA_DE_FDR_0.05   | 2690   | GHR        |
| SZ_DE | CM_NO_SVA_DE_FDR_0.05   | 79669  | C3orf52    |
| SZ_DE | CM_NO_SVA_DE_FDR_0.05   | 117177 | RAB3IP     |
| SZ_DE | CM_NO_SVA_DE_FDR_0.05   | 330    | BIRC3      |
| SZ_DE | CM_NO_SVA_DE_FDR_0.05   | 9750   | FAM65B     |
| SZ_DE | CM_NO_SVA_DE_FDR_0.05   | 116    | ADCYAP1    |
| SZ_DE | CM_NO_SVA_DE_FDR_0.05   | 84458  | LCOR       |
| SZ_DE | CM_NO_SVA_DE_FDR_0.05   | 10100  | TSPAN2     |
| SZ_DE | CM_NO_SVA_DE_FDR_0.05   | 64283  | ARHGEF28   |
| SZ_DE | CM_NO_SVA_DE_FDR_0.05   | 4160   | MC4R       |
| SZ_DE | CM_NO_SVA_DE_FDR_0.05   | 23200  | ATP11B     |
| SZ_DE | CM_NO_SVA_DE_FDR_0.05   | 23002  | DAAM1      |
| SZ_DE | CM_NO_SVA_DE_FDR_0.05   | 6095   | RORA       |
| SZ_DE | CM_NO_SVA_DE_FDR_0.05   | 793    | CALB1      |
| SZ_DE | CM_NO_SVA_DE_FDR_0.05   | 57684  | ZBTB26     |
| SZ_DE | CM_NO_SVA_DE_FDR_0.05   | 128611 | ZNF831     |
| SZ_DE | CM_NO_SVA_DE_FDR_0.05   | 26973  | CHORDC1    |
| SZ_DE | CM_NO_SVA_DE_FDR_0.05   | 2334   | AFF2       |
| SZ_DE | CM_NO_SVA_DE_FDR_0.05   | 54891  | INO80D     |
| SZ_DE | CM_NO_SVA_DE_FDR_0.05   | 23429  | RYBP       |
| SZ_DE | CM_NO_SVA_DE_FDR_0.05   | 10178  | TENM1      |
| SZ_DE | CM_NO_SVA_DE_FDR_0.05   | 154007 | SNRNP48    |
| SZ_DE | CM_NO_SVA_DE_FDR_0.05   | 55466  | DNAJA4     |
| SZ_DE | CM_NO_SVA_DE_FDR_0.05   | 55033  | FKBP14     |
| SZ_DE | CM_NO_SVA_DE_FDR_0.05   | 9991   | PTBP3      |
| SZ_DE | CM_NO_SVA_DE_FDR_0.05   | 80306  | MED28      |
| SZ_DE | CM_NO_SVA_DE_FDR_0.05   | 79139  | DERL1      |
| SZ_DE | CM_NO_SVA_DE_FDR_0.05   | 389677 | RBM12B     |



|       |                       |           |              |
|-------|-----------------------|-----------|--------------|
| SZ_DE | CM_NO_SVA_DE_FDR_0.05 | 2558      | GABRA5       |
| SZ_DE | CM_NO_SVA_DE_FDR_0.05 | 158399    | ZNF483       |
| SZ_DE | CM_NO_SVA_DE_FDR_0.05 | 25896     | INTS7        |
| SZ_DE | CM_NO_SVA_DE_FDR_0.05 | 400120    | SERTM1       |
| SZ_DE | CM_NO_SVA_DE_FDR_0.05 | 3082      | HGF          |
| SZ_DE | CM_NO_SVA_DE_FDR_0.05 | 51762     | RAB8B        |
| SZ_DE | CM_NO_SVA_DE_FDR_0.05 | 5067      | CNTN3        |
| SZ_DE | CM_NO_SVA_DE_FDR_0.05 | 2149      | F2R          |
| SZ_DE | CM_NO_SVA_DE_FDR_0.05 | 10914     | PAPOLA       |
| SZ_DE | CM_NO_SVA_DE_FDR_0.05 | 54726     | OTUD4        |
| SZ_DE | CM_NO_SVA_DE_FDR_0.05 | 54734     | RAB39A       |
| SZ_DE | CM_NO_SVA_DE_FDR_0.05 | 23089     | PEG10        |
| SZ_DE | CM_NO_SVA_DE_FDR_0.05 | 246175    | CNOT6L       |
| SZ_DE | CM_NO_SVA_DE_FDR_0.05 | 3738      | KCNA3        |
| SZ_DE | CM_NO_SVA_DE_FDR_0.05 | 7762      | ZNF215       |
| SZ_DE | CM_NO_SVA_DE_FDR_0.05 | 8658      | TNKS         |
| SZ_DE | CM_NO_SVA_DE_FDR_0.05 | 83448     | PUS7L        |
| SZ_DE | CM_NO_SVA_DE_FDR_0.05 | 4015      | LOX          |
| SZ_DE | CM_NO_SVA_DE_FDR_0.05 | 219623    | TMEM26       |
| SZ_DE | CM_NO_SVA_DE_FDR_0.05 | 11231     | SEC63        |
| SZ_DE | CM_NO_SVA_DE_FDR_0.05 | 57472     | CNOT6        |
| SZ_DE | CM_NO_SVA_DE_FDR_0.05 | 92126     | DSEL         |
| SZ_DE | CM_NO_SVA_DE_FDR_0.05 | 64853     | AIDA         |
| SZ_DE | CM_NO_SVA_DE_FDR_0.05 | 166336    | PRICKLE2     |
| SZ_DE | CM_NO_SVA_DE_FDR_0.05 | 200576    | PIKFYVE      |
| SZ_DE | CM_NO_SVA_DE_FDR_0.05 | 57600     | FNIP2        |
| SZ_DE | CM_NO_SVA_DE_FDR_0.05 | 90134     | KCNH7        |
| SZ_DE | CM_NO_SVA_DE_FDR_0.05 | 23760     | PITPNB       |
| SZ_DE | CM_NO_SVA_DE_FDR_0.05 | 3189      | HNRNPH3      |
| SZ_DE | CM_NO_SVA_DE_FDR_0.05 | 121536    | AEBP2        |
| SZ_DE | CM_NO_SVA_DE_FDR_0.05 | 100216479 | LOC100216479 |
| SZ_DE | CM_NO_SVA_DE_FDR_0.05 | 54778     | RNF111       |
| SZ_DE | CM_NO_SVA_DE_FDR_0.05 | 161357    | MDGA2        |
| SZ_DE | CM_NO_SVA_DE_FDR_0.05 | 64393     | ZMAT3        |
| SZ_DE | CM_NO_SVA_DE_FDR_0.05 | 116150    | NUS1         |
| SZ_DE | CM_NO_SVA_DE_FDR_0.05 | 285220    | EPHA6        |
| SZ_DE | CM_NO_SVA_DE_FDR_0.05 | 8690      | JRKL         |
| SZ_DE | CM_NO_SVA_DE_FDR_0.05 | 5865      | RAB3B        |
| SZ_DE | CM_NO_SVA_DE_FDR_0.05 | 57708     | MIER1        |
| SZ_DE | CM_NO_SVA_DE_FDR_0.05 | 8001      | GLRA3        |
| SZ_DE | CM_NO_SVA_DE_FDR_0.05 | 8976      | WASL         |
| SZ_DE | CM_NO_SVA_DE_FDR_0.05 | 127253    | TYW3         |
| SZ_DE | CM_NO_SVA_DE_FDR_0.05 | 85465     | EPT1         |
| SZ_DE | CM_NO_SVA_DE_FDR_0.05 | 1452      | CSNK1A1      |
| SZ_DE | CM_NO_SVA_DE_FDR_0.05 | 79836     | LONRF3       |
| SZ_DE | CM_NO_SVA_DE_FDR_0.05 | 2673      | GFPT1        |
| SZ_DE | CM_NO_SVA_DE_FDR_0.05 | 22862     | FNDC3A       |
| SZ_DE | CM_NO_SVA_DE_FDR_0.05 | 54989     | ZNF770       |
| SZ_DE | CM_NO_SVA_DE_FDR_0.05 | 256130    | TMEM196      |
| SZ_DE | CM_NO_SVA_DE_FDR_0.05 | 27        | ABL2         |
| SZ_DE | CM_NO_SVA_DE_FDR_0.05 | 57687     | VAT1L        |
| SZ_DE | CM_NO_SVA_DE_FDR_0.05 | 54733     | SLC35F2      |
| SZ_DE | CM_NO_SVA_DE_FDR_0.05 | 1600      | DAB1         |
| SZ_DE | CM_NO_SVA_DE_FDR_0.05 | 10251     | SPRY3        |
| SZ_DE | CM_NO_SVA_DE_FDR_0.05 | 3479      | IGF1         |
| SZ_DE | CM_NO_SVA_DE_FDR_0.05 | 6120      | RPE          |
| SZ_DE | CM_NO_SVA_DE_FDR_0.05 | 64762     | GAREM        |
| SZ_DE | CM_NO_SVA_DE_FDR_0.05 | 25940     | FAM98A       |

|       |                       |           |              |
|-------|-----------------------|-----------|--------------|
| SZ_DE | CM_NO_SVA_DE_FDR_0.05 | 4147      | MATN2        |
| SZ_DE | CM_NO_SVA_DE_FDR_0.05 | 283464    | GXYLT1       |
| SZ_DE | CM_NO_SVA_DE_FDR_0.05 | 64398     | MPP5         |
| SZ_DE | CM_NO_SVA_DE_FDR_0.05 | 55086     | CXorf57      |
| SZ_DE | CM_NO_SVA_DE_FDR_0.05 | 1012      | CDH13        |
| SZ_DE | CM_NO_SVA_DE_FDR_0.05 | 3181      | HNRNPA2B1    |
| SZ_DE | CM_NO_SVA_DE_FDR_0.05 | 253512    | SLC25A30     |
| SZ_DE | CM_NO_SVA_DE_FDR_0.05 | 7077      | TIMP2        |
| SZ_DE | CM_NO_SVA_DE_FDR_0.05 | 650655    | ABCA17P      |
| SZ_DE | CM_NO_SVA_DE_FDR_0.05 | 9874      | TLK1         |
| SZ_DE | CM_NO_SVA_DE_FDR_0.05 | 54542     | RC3H2        |
| SZ_DE | CM_NO_SVA_DE_FDR_0.05 | 317       | APAF1        |
| SZ_DE | CM_NO_SVA_DE_FDR_0.05 | 57484     | RNF150       |
| SZ_DE | CM_NO_SVA_DE_FDR_0.05 | 219333    | USP12        |
| SZ_DE | CM_NO_SVA_DE_FDR_0.05 | 55279     | ZNF654       |
| SZ_DE | CM_NO_SVA_DE_FDR_0.05 | 10903     | MTMR11       |
| SZ_DE | CM_NO_SVA_DE_FDR_0.05 | 166785    | MMAA         |
| SZ_DE | CM_NO_SVA_DE_FDR_0.05 | 5471      | PPAT         |
| SZ_DE | CM_NO_SVA_DE_FDR_0.05 | 129450    | TYW5         |
| SZ_DE | CM_NO_SVA_DE_FDR_0.05 | 146057    | TTBK2        |
| SZ_DE | CM_NO_SVA_DE_FDR_0.05 | 57532     | NUFIP2       |
| SZ_DE | CM_NO_SVA_DE_FDR_0.05 | 85460     | ZNF518B      |
| SZ_DE | CM_NO_SVA_DE_FDR_0.05 | 3320      | HSP90AA1     |
| SZ_DE | CM_NO_SVA_DE_FDR_0.05 | 149041    | RC3H1        |
| SZ_DE | CM_NO_SVA_DE_FDR_0.05 | 11320     | MGAT4A       |
| SZ_DE | CM_NO_SVA_DE_FDR_0.05 | 399959    | MIR100HG     |
| SZ_DE | CM_NO_SVA_DE_FDR_0.05 | 5610      | EIF2AK2      |
| SZ_DE | CM_NO_SVA_DE_FDR_0.05 | 604       | BCL6         |
| SZ_DE | CM_NO_SVA_DE_FDR_0.05 | 1540      | CYLD         |
| SZ_DE | CM_NO_SVA_DE_FDR_0.05 | 8476      | CDC42BPA     |
| SZ_DE | CM_NO_SVA_DE_FDR_0.05 | 162394    | SLFN5        |
| SZ_DE | CM_NO_SVA_DE_FDR_0.05 | 3598      | IL13RA2      |
| SZ_DE | CM_NO_SVA_DE_FDR_0.05 | 79071     | ELOVL6       |
| SZ_DE | CM_NO_SVA_DE_FDR_0.05 | 140890    | SREK1        |
| SZ_DE | CM_NO_SVA_DE_FDR_0.05 | 56829     | ZC3HAV1      |
| SZ_DE | CM_NO_SVA_DE_FDR_0.05 | 101927193 | LOC101927193 |
| SZ_DE | CM_NO_SVA_DE_FDR_0.05 | 390616    | ANKRD34C     |
| SZ_DE | CM_NO_SVA_DE_FDR_0.05 | 8087      | FXR1         |
| SZ_DE | CM_NO_SVA_DE_FDR_0.05 | 51361     | HOOK1        |
| SZ_DE | CM_NO_SVA_DE_FDR_0.05 | 27324     | TOX3         |
| SZ_DE | CM_NO_SVA_DE_FDR_0.05 | 221895    | JAZF1        |
| SZ_DE | CM_NO_SVA_DE_FDR_0.05 | 50650     | ARHGEF3      |
| SZ_DE | CM_NO_SVA_DE_FDR_0.05 | 205       | AK4          |
| SZ_DE | CM_NO_SVA_DE_FDR_0.05 | 6925      | TCF4         |
| SZ_DE | CM_NO_SVA_DE_FDR_0.05 | 5927      | KDM5A        |
| SZ_DE | CM_NO_SVA_DE_FDR_0.05 | 57182     | ANKRD50      |
| SZ_DE | CM_NO_SVA_DE_FDR_0.05 | 167227    | DCP2         |
| SZ_DE | CM_NO_SVA_DE_FDR_0.05 | 7514      | XPO1         |
| SZ_DE | CM_NO_SVA_DE_FDR_0.05 | 56647     | BCCIP        |
| SZ_DE | CM_NO_SVA_DE_FDR_0.05 | 9320      | TRIP12       |
| SZ_DE | CM_NO_SVA_DE_FDR_0.05 | 9877      | ZC3H11A      |
| SZ_DE | CM_NO_SVA_DE_FDR_0.05 | 27146     | FAM184B      |
| SZ_DE | CM_NO_SVA_DE_FDR_0.05 | 27152     | INTU         |
| SZ_DE | CM_NO_SVA_DE_FDR_0.05 | 23411     | SIRT1        |
| SZ_DE | CM_NO_SVA_DE_FDR_0.05 | 92597     | MOB1B        |
| SZ_DE | CM_NO_SVA_DE_FDR_0.05 | 7273      | TTN          |
| SZ_DE | CM_NO_SVA_DE_FDR_0.05 | 159090    | FAM122B      |
| SZ_DE | CM_NO_SVA_DE_FDR_0.05 | 92        | ACVR2A       |

|       |                       |           |              |
|-------|-----------------------|-----------|--------------|
| SZ_DE | CM_NO_SVA_DE_FDR_0.05 | 10146     | G3BP1        |
| SZ_DE | CM_NO_SVA_DE_FDR_0.05 | 55728     | N4BP2        |
| SZ_DE | CM_NO_SVA_DE_FDR_0.05 | 57223     | SMEK2        |
| SZ_DE | CM_NO_SVA_DE_FDR_0.05 | 11052     | CPSF6        |
| SZ_DE | CM_NO_SVA_DE_FDR_0.05 | 4673      | NAP1L1       |
| SZ_DE | CM_NO_SVA_DE_FDR_0.05 | 10884     | MRPS30       |
| SZ_DE | CM_NO_SVA_DE_FDR_0.05 | 139065    | SLITRK4      |
| SZ_DE | CM_NO_SVA_DE_FDR_0.05 | 29068     | ZBTB44       |
| SZ_DE | CM_NO_SVA_DE_FDR_0.05 | 7073      | TIAL1        |
| SZ_DE | CM_NO_SVA_DE_FDR_0.05 | 153222    | CREBRF       |
| SZ_DE | CM_NO_SVA_DE_FDR_0.05 | 56245     | C21orf62     |
| SZ_DE | CM_NO_SVA_DE_FDR_0.05 | 10116     | FEM1B        |
| SZ_DE | CM_NO_SVA_DE_FDR_0.05 | 3192      | HNRNPU       |
| SZ_DE | CM_NO_SVA_DE_FDR_0.05 | 10285     | SMNDC1       |
| SZ_DE | CM_NO_SVA_DE_FDR_0.05 | 100506606 | LOC100506606 |
| SZ_DE | CM_NO_SVA_DE_FDR_0.05 | 3730      | KAL1         |
| SZ_DE | CM_NO_SVA_DE_FDR_0.05 | 64795     | RMND5A       |
| SZ_DE | CM_NO_SVA_DE_FDR_0.05 | 9001      | HAP1         |
| SZ_DE | CM_NO_SVA_DE_FDR_0.05 | 9931      | HELZ         |
| SZ_DE | CM_NO_SVA_DE_FDR_0.05 | 7803      | PTP4A1       |
| SZ_DE | CM_NO_SVA_DE_FDR_0.05 | 4023      | LPL          |
| SZ_DE | CM_NO_SVA_DE_FDR_0.05 | 65065     | NBEAL1       |
| SZ_DE | CM_NO_SVA_DE_FDR_0.05 | 115827    | RAB3C        |
| SZ_DE | CM_NO_SVA_DE_FDR_0.05 | 1809      | DPYSL3       |
| SZ_DE | CM_NO_SVA_DE_FDR_0.05 | 23603     | CORO1C       |
| SZ_DE | CM_NO_SVA_DE_FDR_0.05 | 4154      | MBNL1        |
| SZ_DE | CM_NO_SVA_DE_FDR_0.05 | 403314    | APOBEC4      |
| SZ_DE | CM_NO_SVA_DE_FDR_0.05 | 84919     | PPP1R15B     |
| SZ_DE | CM_NO_SVA_DE_FDR_0.05 | 91851     | CHRD1        |
| SZ_DE | CM_NO_SVA_DE_FDR_0.05 | 8539      | API5         |
| SZ_DE | CM_NO_SVA_DE_FDR_0.05 | 5033      | P4HA1        |
| SZ_DE | CM_NO_SVA_DE_FDR_0.05 | 22847     | ZNF507       |
| SZ_DE | CM_NO_SVA_DE_FDR_0.05 | 642273    | FAM110C      |
| SZ_DE | CM_NO_SVA_DE_FDR_0.05 | 113251    | LARP4        |
| SZ_DE | CM_NO_SVA_DE_FDR_0.05 | 56937     | PMEPA1       |
| SZ_DE | CM_NO_SVA_DE_FDR_0.05 | 6526      | SLCSA3       |
| SZ_DE | CM_NO_SVA_DE_FDR_0.05 | 56987     | BBX          |
| SZ_DE | CM_NO_SVA_DE_FDR_0.05 | 25849     | PARM1        |
| SZ_DE | CM_NO_SVA_DE_FDR_0.05 | 114294    | LACTB        |
| SZ_DE | CM_NO_SVA_DE_FDR_0.05 | 51141     | INSIG2       |
| SZ_DE | CM_NO_SVA_DE_FDR_0.05 | 23240     | KIAA0922     |
| SZ_DE | CM_NO_SVA_DE_FDR_0.05 | 492311    | IGIP         |
| SZ_DE | CM_NO_SVA_DE_FDR_0.05 | 80351     | TNKS2        |
| SZ_DE | CM_NO_SVA_DE_FDR_0.05 | 7436      | VLDLR        |
| SZ_DE | CM_NO_SVA_DE_FDR_0.05 | 64376     | IKZF5        |
| SZ_DE | CM_NO_SVA_DE_FDR_0.05 | 7223      | TRPC4        |
| SZ_DE | CM_NO_SVA_DE_FDR_0.05 | 100505532 | LOC100505532 |
| SZ_DE | CM_NO_SVA_DE_FDR_0.05 | 283742    | FAM98B       |
| SZ_DE | CM_NO_SVA_DE_FDR_0.05 | 9317      | PTER         |
| SZ_DE | CM_NO_SVA_DE_FDR_0.05 | 8545      | CGGBP1       |
| SZ_DE | CM_NO_SVA_DE_FDR_0.05 | 2562      | GABRB3       |
| SZ_DE | CM_NO_SVA_DE_FDR_0.05 | 23543     | RBFOX2       |
| SZ_DE | CM_NO_SVA_DE_FDR_0.05 | 10154     | PLXNC1       |
| SZ_DE | CM_NO_SVA_DE_FDR_0.05 | 23394     | ADNP         |
| SZ_DE | CM_NO_SVA_DE_FDR_0.05 | 91404     | SESTD1       |
| SZ_DE | CM_NO_SVA_DE_FDR_0.05 | 57403     | RAB22A       |
| SZ_DE | CM_NO_SVA_DE_FDR_0.05 | 80124     | VCPIP1       |
| SZ_DE | CM_NO_SVA_DE_FDR_0.05 | 23210     | JMJD6        |

|       |                       |           |              |
|-------|-----------------------|-----------|--------------|
| SZ_DE | CM_NO_SVA_DE_FDR_0.05 | 22871     | NLGN1        |
| SZ_DE | CM_NO_SVA_DE_FDR_0.05 | 10168     | ZNF197       |
| SZ_DE | CM_NO_SVA_DE_FDR_0.05 | 284370    | ZNF615       |
| SZ_DE | CM_NO_SVA_DE_FDR_0.05 | 8715      | NOLA4        |
| SZ_DE | CM_NO_SVA_DE_FDR_0.05 | 80155     | NAA15        |
| SZ_DE | CM_NO_SVA_DE_FDR_0.05 | 147339    | C18orf25     |
| SZ_DE | CM_NO_SVA_DE_FDR_0.05 | 11260     | XPOT         |
| SZ_DE | CM_NO_SVA_DE_FDR_0.05 | 7693      | ZNF134       |
| SZ_DE | CM_NO_SVA_DE_FDR_0.05 | 56986     | DTWD1        |
| SZ_DE | CM_NO_SVA_DE_FDR_0.05 | 8036      | SHOC2        |
| SZ_DE | CM_NO_SVA_DE_FDR_0.05 | 9646      | CTR9         |
| SZ_DE | CM_NO_SVA_DE_FDR_0.05 | 6049      | RNF6         |
| SZ_DE | CM_NO_SVA_DE_FDR_0.05 | 152185    | SPICE1       |
| SZ_DE | CM_NO_SVA_DE_FDR_0.05 | 10622     | POLR3G       |
| SZ_DE | CM_NO_SVA_DE_FDR_0.05 | 140767    | NRSN1        |
| SZ_DE | CM_NO_SVA_DE_FDR_0.05 | 9559      | VPS26A       |
| SZ_DE | CM_NO_SVA_DE_FDR_0.05 | 10424     | PGRMC2       |
| SZ_DE | CM_NO_SVA_DE_FDR_0.05 | 10228     | STX6         |
| SZ_DE | CM_NO_SVA_DE_FDR_0.05 | 636       | BICD1        |
| SZ_DE | CM_NO_SVA_DE_FDR_0.05 | 26052     | DNM3         |
| SZ_DE | CM_NO_SVA_DE_FDR_0.05 | 10746     | MAP3K2       |
| SZ_DE | CM_NO_SVA_DE_FDR_0.05 | 23269     | MGA          |
| SZ_DE | CM_NO_SVA_DE_FDR_0.05 | 144402    | CPNE8        |
| SZ_DE | CM_NO_SVA_DE_FDR_0.05 | 85464     | SSH2         |
| SZ_DE | CM_NO_SVA_DE_FDR_0.05 | 546       | ATRX         |
| SZ_DE | CM_NO_SVA_DE_FDR_0.05 | 55714     | TENM3        |
| SZ_DE | CM_NO_SVA_DE_FDR_0.05 | 6654      | SOS1         |
| SZ_DE | CM_NO_SVA_DE_FDR_0.05 | 10097     | ACTR2        |
| SZ_DE | CM_NO_SVA_DE_FDR_0.05 | 64854     | USP46        |
| SZ_DE | CM_NO_SVA_DE_FDR_0.05 | 55668     | GPATCH2L     |
| SZ_DE | CM_NO_SVA_DE_FDR_0.05 | 57551     | TAOK1        |
| SZ_DE | CM_NO_SVA_DE_FDR_0.05 | 64770     | CCDC14       |
| SZ_DE | CM_NO_SVA_DE_FDR_0.05 | 388558    | ZNF808       |
| SZ_DE | CM_NO_SVA_DE_FDR_0.05 | 84295     | PHF6         |
| SZ_DE | CM_NO_SVA_DE_FDR_0.05 | 116443    | GRIN3A       |
| SZ_DE | CM_NO_SVA_DE_FDR_0.05 | 100381270 | ZBED6        |
| SZ_DE | CM_NO_SVA_DE_FDR_0.05 | 23039     | XPO7         |
| SZ_DE | CM_NO_SVA_DE_FDR_0.05 | 4289      | MKLN1        |
| SZ_DE | CM_NO_SVA_DE_FDR_0.05 | 157807    | CLVS1        |
| SZ_DE | CM_NO_SVA_DE_FDR_0.05 | 6400      | SEL1L        |
| SZ_DE | CM_NO_SVA_DE_FDR_0.05 | 10794     | ZNF460       |
| SZ_DE | CM_NO_SVA_DE_FDR_0.05 | 56886     | UGGT1        |
| SZ_DE | CM_NO_SVA_DE_FDR_0.05 | 55532     | SLC30A10     |
| SZ_DE | CM_NO_SVA_DE_FDR_0.05 | 3837      | KPNB1        |
| SZ_DE | CM_NO_SVA_DE_FDR_0.05 | 688       | KLF5         |
| SZ_DE | CM_NO_SVA_DE_FDR_0.05 | 80223     | RAB11FIP1    |
| SZ_DE | CM_NO_SVA_DE_FDR_0.05 | 8898      | MTMR2        |
| SZ_DE | CM_NO_SVA_DE_FDR_0.05 | 9069      | CLDN12       |
| SZ_DE | CM_NO_SVA_DE_FDR_0.05 | 4084      | MXD1         |
| SZ_DE | CM_NO_SVA_DE_FDR_0.05 | 133746    | JMY          |
| SZ_DE | CM_NO_SVA_DE_FDR_0.05 | 23049     | SMG1         |
| SZ_DE | CM_NO_SVA_DE_FDR_0.05 | 26019     | UPF2         |
| SZ_DE | CM_NO_SVA_DE_FDR_0.05 | 94122     | SYTL5        |
| SZ_DE | CM_NO_SVA_DE_FDR_0.05 | 65267     | WNK3         |
| SZ_DE | CM_NO_SVA_DE_FDR_0.05 | 2005      | ELK4         |
| SZ_DE | CM_NO_SVA_DE_FDR_0.05 | 22908     | SACM1L       |
| SZ_DE | CM_NO_SVA_DE_FDR_0.05 | 23369     | PUM2         |
| SZ_DE | CM_NO_SVA_DE_FDR_0.05 | 101927455 | LOC101927455 |

|       |                       |           |              |
|-------|-----------------------|-----------|--------------|
| SZ_DE | CM_NO_SVA_DE_FDR_0.05 | 5494      | PPM1A        |
| SZ_DE | CM_NO_SVA_DE_FDR_0.05 | 340719    | NANOS1       |
| SZ_DE | CM_NO_SVA_DE_FDR_0.05 | 54665     | RSBN1        |
| SZ_DE | CM_NO_SVA_DE_FDR_0.05 | 5144      | PDE4D        |
| SZ_DE | CM_NO_SVA_DE_FDR_0.05 | 7110      | TMF1         |
| SZ_DE | CM_NO_SVA_DE_FDR_0.05 | 8650      | NUMB         |
| SZ_DE | CM_NO_SVA_DE_FDR_0.05 | 9734      | HDAC9        |
| SZ_DE | CM_NO_SVA_DE_FDR_0.05 | 3763      | KCNJ6        |
| SZ_DE | CM_NO_SVA_DE_FDR_0.05 | 1106      | CHD2         |
| SZ_DE | CM_NO_SVA_DE_FDR_0.05 | 160760    | PPTC7        |
| SZ_DE | CM_NO_SVA_DE_FDR_0.05 | 10808     | HSPH1        |
| SZ_DE | CM_NO_SVA_DE_FDR_0.05 | 79642     | ARSJ         |
| SZ_DE | CM_NO_SVA_DE_FDR_0.05 | 100507388 | LOC100507388 |
| SZ_DE | CM_NO_SVA_DE_FDR_0.05 | 2332      | FMR1         |
| SZ_DE | CM_NO_SVA_DE_FDR_0.05 | 80319     | CXXC4        |
| SZ_DE | CM_NO_SVA_DE_FDR_0.05 | 100131067 | CKMT2-AS1    |
| SZ_DE | CM_NO_SVA_DE_FDR_0.05 | 654502    | IQCJ         |
| SZ_DE | CM_NO_SVA_DE_FDR_0.05 | 23034     | SAMD4A       |
| SZ_DE | CM_NO_SVA_DE_FDR_0.05 | 8916      | HERC3        |
| SZ_DE | CM_NO_SVA_DE_FDR_0.05 | 64282     | PAPD5        |
| SZ_DE | CM_NO_SVA_DE_FDR_0.05 | 3658      | IREB2        |
| SZ_DE | CM_NO_SVA_DE_FDR_0.05 | 84125     | LRR1Q1       |
| SZ_DE | CM_NO_SVA_DE_FDR_0.05 | 152006    | RNF38        |
| SZ_DE | CM_NO_SVA_DE_FDR_0.05 | 22824     | HSPA4L       |
| SZ_DE | CM_NO_SVA_DE_FDR_0.05 | 8527      | DGKD         |
| SZ_DE | CM_NO_SVA_DE_FDR_0.05 | 1739      | DLG1         |
| SZ_DE | CM_NO_SVA_DE_FDR_0.05 | 79834     | PEAK1        |
| SZ_DE | CM_NO_SVA_DE_FDR_0.05 | 27125     | AFF4         |
| SZ_DE | CM_NO_SVA_DE_FDR_0.05 | 5921      | RASA1        |
| SZ_DE | CM_NO_SVA_DE_FDR_0.05 | 84552     | PARD6G       |
| SZ_DE | CM_NO_SVA_DE_FDR_0.05 | 5954      | RCN1         |
| SZ_DE | CM_NO_SVA_DE_FDR_0.05 | 56929     | FEM1C        |
| SZ_DE | CM_NO_SVA_DE_FDR_0.05 | 285636    | C5orf51      |
| SZ_DE | CM_NO_SVA_DE_FDR_0.05 | 57570     | TRMT5        |
| SZ_DE | CM_NO_SVA_DE_FDR_0.05 | 10087     | COL4A3BP     |
| SZ_DE | CM_NO_SVA_DE_FDR_0.05 | 166929    | SGMS2        |
| SZ_DE | CM_NO_SVA_DE_FDR_0.05 | 2066      | ERBB4        |
| SZ_DE | CM_NO_SVA_DE_FDR_0.05 | 57530     | CGN          |
| SZ_DE | CM_NO_SVA_DE_FDR_0.05 | 55787     | TXLNG        |
| SZ_DE | CM_NO_SVA_DE_FDR_0.05 | 1656      | DDX6         |
| SZ_DE | CM_NO_SVA_DE_FDR_0.05 | 8701      | DNAH11       |
| SZ_DE | CM_NO_SVA_DE_FDR_0.05 | 7188      | TRAF5        |
| SZ_DE | CM_NO_SVA_DE_FDR_0.05 | 6578      | SLCO2A1      |
| SZ_DE | CM_NO_SVA_DE_FDR_0.05 | 216       | ALDH1A1      |
| SZ_DE | CM_NO_SVA_DE_FDR_0.05 | 6988      | TCTA         |
| SZ_DE | CM_NO_SVA_DE_FDR_0.05 | 375704    | ENHO         |
| SZ_DE | CM_NO_SVA_DE_FDR_0.05 | 92241     | RCSD1        |
| SZ_DE | CM_NO_SVA_DE_FDR_0.05 | 63941     | NECAB3       |
| SZ_DE | CM_NO_SVA_DE_FDR_0.05 | 1869      | E2F1         |
| SZ_DE | CM_NO_SVA_DE_FDR_0.05 | 399474    | TMEM200B     |
| SZ_DE | CM_NO_SVA_DE_FDR_0.05 | 60495     | HPSE2        |
| SZ_DE | CM_NO_SVA_DE_FDR_0.05 | 55806     | HR           |
| SZ_DE | CM_NO_SVA_DE_FDR_0.05 | 84572     | GNPTG        |
| SZ_DE | CM_NO_SVA_DE_FDR_0.05 | 10234     | LRR17        |
| SZ_DE | CM_NO_SVA_DE_FDR_0.05 | 11152     | WDR45        |
| SZ_DE | CM_NO_SVA_DE_FDR_0.05 | 5192      | PEX10        |
| SZ_DE | CM_NO_SVA_DE_FDR_0.05 | 148198    | ZNF98        |
| SZ_DE | CM_NO_SVA_DE_FDR_0.05 | 10266     | RAMP2        |

|       |                       |           |               |
|-------|-----------------------|-----------|---------------|
| SZ_DE | CM_NO_SVA_DE_FDR_0.05 | 56917     | MEIS3         |
| SZ_DE | CM_NO_SVA_DE_FDR_0.05 | 50509     | COL5A3        |
| SZ_DE | CM_NO_SVA_DE_FDR_0.05 | 818       | CAMK2G        |
| SZ_DE | CM_NO_SVA_DE_FDR_0.05 | 5502      | PPP1R1A       |
| SZ_DE | CM_NO_SVA_DE_FDR_0.05 | 3481      | IGF2          |
| SZ_DE | CM_NO_SVA_DE_FDR_0.05 | 55317     | AP5S1         |
| SZ_DE | CM_NO_SVA_DE_FDR_0.05 | 8912      | CACNA1H       |
| SZ_DE | CM_NO_SVA_DE_FDR_0.05 | 762       | CA4           |
| SZ_DE | CM_NO_SVA_DE_FDR_0.05 | 79041     | TMEM38A       |
| SZ_DE | CM_NO_SVA_DE_FDR_0.05 | 5409      | PNMT          |
| SZ_DE | CM_NO_SVA_DE_FDR_0.05 | 6324      | SCN1B         |
| SZ_DE | CM_NO_SVA_DE_FDR_0.05 | 100133669 | LOC100133669  |
| SZ_DE | CM_NO_SVA_DE_FDR_0.05 | 2038      | EPB42         |
| SZ_DE | CM_NO_SVA_DE_FDR_0.05 | 572       | BAD           |
| SZ_DE | CM_NO_SVA_DE_FDR_0.05 | 53342     | IL17D         |
| SZ_DE | CM_NO_SVA_DE_FDR_0.05 | 79095     | C9orf16       |
| SZ_DE | CM_NO_SVA_DE_FDR_0.05 | 50649     | ARHGEF4       |
| SZ_DE | CM_NO_SVA_DE_FDR_0.05 | 8482      | SEMA7A        |
| SZ_DE | CM_NO_SVA_DE_FDR_0.05 | 255275    | MYADML2       |
| SZ_DE | CM_NO_SVA_DE_FDR_0.05 | 170463    | SSBP4         |
| SZ_DE | CM_NO_SVA_DE_FDR_0.05 | 79785     | RERGL         |
| SZ_DE | CM_NO_SVA_DE_FDR_0.05 | 23541     | SEC14L2       |
| SZ_DE | CM_NO_SVA_DE_FDR_0.05 | 65988     | ZNF747        |
| SZ_DE | CM_NO_SVA_DE_FDR_0.05 | 152002    | XXYLT1        |
| SZ_DE | CM_NO_SVA_DE_FDR_0.05 | 7123      | CLEC3B        |
| SZ_DE | CM_NO_SVA_DE_FDR_0.05 | 51257     | MARCH2        |
| SZ_DE | CM_NO_SVA_DE_FDR_0.05 | 574036    | SERTAD4-AS1   |
| SZ_DE | CM_NO_SVA_DE_FDR_0.05 | 1160      | CKMT2         |
| SZ_DE | CM_NO_SVA_DE_FDR_0.05 | 8835      | SOCS2         |
| SZ_DE | CM_NO_SVA_DE_FDR_0.05 | 8986      | RPS6KA4       |
| SZ_DE | CM_NO_SVA_DE_FDR_0.05 | 79947     | DHDDS         |
| SZ_DE | CM_NO_SVA_DE_FDR_0.05 | 89958     | SAPCD2        |
| SZ_DE | CM_NO_SVA_DE_FDR_0.05 | 56961     | SHD           |
| SZ_DE | CM_NO_SVA_DE_FDR_0.05 | 55152     | DALRD3        |
| SZ_DE | CM_NO_SVA_DE_FDR_0.05 | 254295    | PHYHD1        |
| SZ_DE | CM_NO_SVA_DE_FDR_0.05 | 84681     | HINT2         |
| SZ_DE | CM_NO_SVA_DE_FDR_0.05 | 10023     | FRAT1         |
| SZ_DE | CM_NO_SVA_DE_FDR_0.05 | 55588     | MED29         |
| SZ_DE | CM_NO_SVA_DE_FDR_0.05 | 56603     | CYP26B1       |
| SZ_DE | CM_NO_SVA_DE_FDR_0.05 | 2261      | FGFR3         |
| SZ_DE | CM_NO_SVA_DE_FDR_0.05 | 54776     | PPP1R12C      |
| SZ_DE | CM_NO_SVA_DE_FDR_0.05 | 2155      | F7            |
| SZ_DE | CM_NO_SVA_DE_FDR_0.05 | 126792    | B3GALT6       |
| SZ_DE | CM_NO_SVA_DE_FDR_0.05 | 283871    | PGP           |
| SZ_DE | CM_NO_SVA_DE_FDR_0.05 | 112464    | PRKDCBP       |
| SZ_DE | CM_NO_SVA_DE_FDR_0.05 | 9377      | COX5A         |
| SZ_DE | CM_NO_SVA_DE_FDR_0.05 | 10814     | CPLX2         |
| SZ_DE | CM_NO_SVA_DE_FDR_0.05 | 768096    | HAR1A         |
| SZ_DE | CM_NO_SVA_DE_FDR_0.05 | 253868    | C20orf166-AS1 |
| SZ_DE | CM_NO_SVA_DE_FDR_0.05 | 64759     | TNS3          |
| SZ_DE | CM_NO_SVA_DE_FDR_0.05 | 100507437 | LOC100507437  |
| SZ_DE | CM_NO_SVA_DE_FDR_0.05 | 116835    | HSPA12B       |
| SZ_DE | CM_NO_SVA_DE_FDR_0.05 | 25870     | SUMF2         |
| SZ_DE | CM_NO_SVA_DE_FDR_0.05 | 284312    | ZSCAN1        |
| SZ_DE | CM_NO_SVA_DE_FDR_0.05 | 27077     | B9D1          |
| SZ_DE | CM_NO_SVA_DE_FDR_0.05 | 4636      | MYL5          |
| SZ_DE | CM_NO_SVA_DE_FDR_0.05 | 2047      | EPHB1         |
| SZ_DE | CM_NO_SVA_DE_FDR_0.05 | 80199     | FUZ           |

|       |                       |           |           |
|-------|-----------------------|-----------|-----------|
| SZ_DE | CM_NO_SVA_DE_FDR_0.05 | 79006     | METRN     |
| SZ_DE | CM_NO_SVA_DE_FDR_0.05 | 283130    | SLC25A45  |
| SZ_DE | CM_NO_SVA_DE_FDR_0.05 | 138429    | PIP5KL1   |
| SZ_DE | CM_NO_SVA_DE_FDR_0.05 | 375775    | PNPLA7    |
| SZ_DE | CM_NO_SVA_DE_FDR_0.05 | 8705      | B3GALT4   |
| SZ_DE | CM_NO_SVA_DE_FDR_0.05 | 10120     | ACTR1B    |
| SZ_DE | CM_NO_SVA_DE_FDR_0.05 | 7138      | TNNT1     |
| SZ_DE | CM_NO_SVA_DE_FDR_0.05 | 10485     | C1orf61   |
| SZ_DE | CM_NO_SVA_DE_FDR_0.05 | 129804    | FBLN7     |
| SZ_DE | CM_NO_SVA_DE_FDR_0.05 | 6881      | TAF10     |
| SZ_DE | CM_NO_SVA_DE_FDR_0.05 | 7264      | TSTA3     |
| SZ_DE | CM_NO_SVA_DE_FDR_0.05 | 79180     | EFHD2     |
| SZ_DE | CM_NO_SVA_DE_FDR_0.05 | 11331     | PHB2      |
| SZ_DE | CM_NO_SVA_DE_FDR_0.05 | 56953     | NT5M      |
| SZ_DE | CM_NO_SVA_DE_FDR_0.05 | 1346      | COX7A1    |
| SZ_DE | CM_NO_SVA_DE_FDR_0.05 | 10361     | NPM2      |
| SZ_DE | CM_NO_SVA_DE_FDR_0.05 | 57348     | TTYH1     |
| SZ_DE | CM_NO_SVA_DE_FDR_0.05 | 2067      | ERCC1     |
| SZ_DE | CM_NO_SVA_DE_FDR_0.05 | 57447     | NDRG2     |
| SZ_DE | CM_NO_SVA_DE_FDR_0.05 | 9088      | PKMYT1    |
| SZ_DE | CM_NO_SVA_DE_FDR_0.05 | 755       | C21orf2   |
| SZ_DE | CM_NO_SVA_DE_FDR_0.05 | 122616    | C14orf79  |
| SZ_DE | CM_NO_SVA_DE_FDR_0.05 | 389084    | C2orf82   |
| SZ_DE | CM_NO_SVA_DE_FDR_0.05 | 65078     | RTN4R     |
| SZ_DE | CM_NO_SVA_DE_FDR_0.05 | 26268     | FBXO9     |
| SZ_DE | CM_NO_SVA_DE_FDR_0.05 | 8303      | SNN       |
| SZ_DE | CM_NO_SVA_DE_FDR_0.05 | 100192379 | PP12613   |
| SZ_DE | CM_NO_SVA_DE_FDR_0.05 | 391356    | PTRHD1    |
| SZ_DE | CM_NO_SVA_DE_FDR_0.05 | 84817     | TXNDC17   |
| SZ_DE | CM_NO_SVA_DE_FDR_0.05 | 26873     | OPLAH     |
| SZ_DE | CM_NO_SVA_DE_FDR_0.05 | 83547     | RILP      |
| SZ_DE | CM_NO_SVA_DE_FDR_0.05 | 25864     | ABHD14A   |
| SZ_DE | CM_NO_SVA_DE_FDR_0.05 | 64838     | FNDC4     |
| SZ_DE | CM_NO_SVA_DE_FDR_0.05 | 339674    | LINC00634 |
| SZ_DE | CM_NO_SVA_DE_FDR_0.05 | 84304     | NUDT22    |
| SZ_DE | CM_NO_SVA_DE_FDR_0.05 | 3489      | IGFBP6    |
| SZ_DE | CM_NO_SVA_DE_FDR_0.05 | 51550     | CINP      |
| SZ_DE | CM_NO_SVA_DE_FDR_0.05 | 56848     | SPHK2     |
| SZ_DE | CM_NO_SVA_DE_FDR_0.05 | 79873     | NUDT18    |
| SZ_DE | CM_NO_SVA_DE_FDR_0.05 | 124936    | CYB5D2    |
| SZ_DE | CM_NO_SVA_DE_FDR_0.05 | 56920     | SEMA3G    |
| SZ_DE | CM_NO_SVA_DE_FDR_0.05 | 503693    | LOH12CR2  |
| SZ_DE | CM_NO_SVA_DE_FDR_0.05 | 6640      | SNTA1     |
| SZ_DE | CM_NO_SVA_DE_FDR_0.05 | 23205     | ACSBG1    |
| SZ_DE | CM_NO_SVA_DE_FDR_0.05 | 1351      | COX8A     |
| SZ_DE | CM_NO_SVA_DE_FDR_0.05 | 90203     | SNX21     |
| SZ_DE | CM_NO_SVA_DE_FDR_0.05 | 55257     | MRGBP     |
| SZ_DE | CM_NO_SVA_DE_FDR_0.05 | 347734    | SLC35B2   |
| SZ_DE | CM_NO_SVA_DE_FDR_0.05 | 84993     | UBL7      |
| SZ_DE | CM_NO_SVA_DE_FDR_0.05 | 9283      | GPR37L1   |
| SZ_DE | CM_NO_SVA_DE_FDR_0.05 | 154790    | CLEC2L    |
| SZ_DE | CM_NO_SVA_DE_FDR_0.05 | 845       | CASQ2     |
| SZ_DE | CM_NO_SVA_DE_FDR_0.05 | 6538      | SLC6A11   |
| SZ_DE | CM_NO_SVA_DE_FDR_0.05 | 5264      | PHYH      |
| SZ_DE | CM_NO_SVA_DE_FDR_0.05 | 51308     | REEP2     |
| SZ_DE | CM_NO_SVA_DE_FDR_0.05 | 6540      | SLC6A13   |
| SZ_DE | CM_NO_SVA_DE_FDR_0.05 | 151835    | CPNE9     |
| SZ_DE | CM_NO_SVA_DE_FDR_0.05 | 11316     | COPE      |

|       |                       |           |            |
|-------|-----------------------|-----------|------------|
| SZ_DE | CM_NO_SVA_DE_FDR_0.05 | 9715      | FAM131B    |
| SZ_DE | CM_NO_SVA_DE_FDR_0.05 | 159371    | SLC35G1    |
| SZ_DE | CM_NO_SVA_DE_FDR_0.05 | 51162     | EGFL7      |
| SZ_DE | CM_NO_SVA_DE_FDR_0.05 | 79754     | ASB13      |
| SZ_DE | CM_NO_SVA_DE_FDR_0.05 | 65094     | JMJD4      |
| SZ_DE | CM_NO_SVA_DE_FDR_0.05 | 92305     | TMEM129    |
| SZ_DE | CM_NO_SVA_DE_FDR_0.05 | 64320     | RNF25      |
| SZ_DE | CM_NO_SVA_DE_FDR_0.05 | 1072      | CFL1       |
| SZ_DE | CM_NO_SVA_DE_FDR_0.05 | 5127      | CDK16      |
| SZ_DE | CM_NO_SVA_DE_FDR_0.05 | 23138     | N4BP3      |
| SZ_DE | CM_NO_SVA_DE_FDR_0.05 | 93058     | COQ10A     |
| SZ_DE | CM_NO_SVA_DE_FDR_0.05 | 10815     | CPLX1      |
| SZ_DE | CM_NO_SVA_DE_FDR_0.05 | 192668    | CYS1       |
| SZ_DE | CM_NO_SVA_DE_FDR_0.05 | 9452      | ITM2A      |
| SZ_DE | CM_NO_SVA_DE_FDR_0.05 | 2788      | GNG7       |
| SZ_DE | CM_NO_SVA_DE_FDR_0.05 | 10445     | MCRS1      |
| SZ_DE | CM_NO_SVA_DE_FDR_0.05 | 114984    | FLYWCH2    |
| SZ_DE | CM_NO_SVA_DE_FDR_0.05 | 55004     | LAMTOR1    |
| SZ_DE | CM_NO_SVA_DE_FDR_0.05 | 1397      | CRIP2      |
| SZ_DE | CM_NO_SVA_DE_FDR_0.05 | 101410534 | DLGAP1-AS4 |
| SZ_DE | CM_NO_SVA_DE_FDR_0.05 | 51621     | KLF13      |
| SZ_DE | CM_NO_SVA_DE_FDR_0.05 | 284358    | MAMSTR     |
| SZ_DE | CM_NO_SVA_DE_FDR_0.05 | 3338      | DNAJC4     |
| SZ_DE | CM_NO_SVA_DE_FDR_0.05 | 85452     | KIAA1751   |
| SZ_DE | CM_NO_SVA_DE_FDR_0.05 | 284076    | TTL6       |
| SZ_DE | CM_NO_SVA_DE_FDR_0.05 | 64236     | PDLIM2     |
| SZ_DE | CM_NO_SVA_DE_FDR_0.05 | 339789    | LINC00299  |
| SZ_DE | CM_NO_SVA_DE_FDR_0.05 | 5662      | PSD        |
| SZ_DE | CM_NO_SVA_DE_FDR_0.05 | 293       | SLC25A6    |
| SZ_DE | CM_NO_SVA_DE_FDR_0.05 | 169270    | ZNF596     |
| SZ_DE | CM_NO_SVA_DE_FDR_0.05 | 1135      | CHRNA2     |
| SZ_DE | CM_NO_SVA_DE_FDR_0.05 | 100507589 | NAGPA-AS1  |
| SZ_DE | CM_NO_SVA_DE_FDR_0.05 | 8525      | DGKZ       |
| SZ_DE | CM_NO_SVA_DE_FDR_0.05 | 66004     | LYNX1      |
| SZ_DE | CM_NO_SVA_DE_FDR_0.05 | 84276     | NICN1      |
| SZ_DE | CM_NO_SVA_DE_FDR_0.05 | 6271      | S100A1     |
| SZ_DE | CM_NO_SVA_DE_FDR_0.05 | 1465      | CSRP1      |
| SZ_DE | CM_NO_SVA_DE_FDR_0.05 | 66035     | SLC2A11    |
| SZ_DE | CM_NO_SVA_DE_FDR_0.05 | 285126    | DNAJC5G    |
| SZ_DE | CM_NO_SVA_DE_FDR_0.05 | 9244      | CRLF1      |
| SZ_DE | CM_NO_SVA_DE_FDR_0.05 | 387640    | SKIDA1     |
| SZ_DE | CM_NO_SVA_DE_FDR_0.05 | 64925     | CCDC71     |
| SZ_DE | CM_NO_SVA_DE_FDR_0.05 | 138311    | FAM69B     |
| SZ_DE | CM_NO_SVA_DE_FDR_0.05 | 1774      | DNASE1L1   |
| SZ_DE | CM_NO_SVA_DE_FDR_0.05 | 162427    | FAM134C    |
| SZ_DE | CM_NO_SVA_DE_FDR_0.05 | 6948      | TCN2       |
| SZ_DE | CM_NO_SVA_DE_FDR_0.05 | 25854     | FAM149A    |
| SZ_DE | CM_NO_SVA_DE_FDR_0.05 | 84275     | SLC25A33   |
| SZ_DE | CM_NO_SVA_DE_FDR_0.05 | 5878      | RAB5C      |
| SZ_DE | CM_NO_SVA_DE_FDR_0.05 | 79412     | KREMEN2    |
| SZ_DE | CM_NO_SVA_DE_FDR_0.05 | 138162    | C9orf116   |
| SZ_DE | CM_NO_SVA_DE_FDR_0.05 | 5625      | PRODH      |
| SZ_DE | CM_NO_SVA_DE_FDR_0.05 | 128439    | SNHG11     |
| SZ_DE | CM_NO_SVA_DE_FDR_0.05 | 85442     | KNDC1      |
| SZ_DE | CM_NO_SVA_DE_FDR_0.05 | 54587     | MXRA8      |
| SZ_DE | CM_NO_SVA_DE_FDR_0.05 | 150383    | CDPF1      |
| SZ_DE | CM_NO_SVA_DE_FDR_0.05 | 6624      | FSCN1      |
| SZ_DE | CM_NO_SVA_DE_FDR_0.05 | 64743     | WDR13      |



|       |                       |           |            |
|-------|-----------------------|-----------|------------|
| SZ_DE | CM_NO_SVA_DE_FDR_0.05 | 105       | ADARB2     |
| SZ_DE | CM_NO_SVA_DE_FDR_0.05 | 84152     | PPP1R1B    |
| SZ_DE | CM_NO_SVA_DE_FDR_0.05 | 29086     | BABAM1     |
| SZ_DE | CM_NO_SVA_DE_FDR_0.05 | 129787    | TMEM18     |
| SZ_DE | CM_NO_SVA_DE_FDR_0.05 | 79671     | NLRX1      |
| SZ_DE | CM_NO_SVA_DE_FDR_0.05 | 10522     | DEAF1      |
| SZ_DE | CM_NO_SVA_DE_FDR_0.05 | 10400     | PEMT       |
| SZ_DE | CM_NO_SVA_DE_FDR_0.05 | 63905     | MANBAL     |
| SZ_DE | CM_NO_SVA_DE_FDR_0.05 | 91252     | SLC39A13   |
| SZ_DE | CM_NO_SVA_DE_FDR_0.05 | 122970    | ACOT4      |
| SZ_DE | CM_NO_SVA_DE_FDR_0.05 | 5201      | PFDN1      |
| SZ_DE | CM_NO_SVA_DE_FDR_0.05 | 30815     | ST6GALNAC6 |
| SZ_DE | CM_NO_SVA_DE_FDR_0.05 | 286336    | FAM78A     |
| SZ_DE | CM_NO_SVA_DE_FDR_0.05 | 84532     | ACSS1      |
| SZ_DE | CM_NO_SVA_DE_FDR_0.05 | 148641    | SLC35F3    |
| SZ_DE | CM_NO_SVA_DE_FDR_0.05 | 94160     | ABCC12     |
| SZ_DE | CM_NO_SVA_DE_FDR_0.05 | 347862    | PDDC1      |
| SZ_DE | CM_NO_SVA_DE_FDR_0.05 | 64792     | RABL5      |
| SZ_DE | CM_NO_SVA_DE_FDR_0.05 | 54982     | CLN6       |
| SZ_DE | CM_NO_SVA_DE_FDR_0.05 | 54884     | RETSAT     |
| SZ_DE | CM_NO_SVA_DE_FDR_0.05 | 285368    | PRRT3      |
| SZ_DE | CM_NO_SVA_DE_FDR_0.05 | 5859      | QARS       |
| SZ_DE | CM_NO_SVA_DE_FDR_0.05 | 80775     | TMEM177    |
| SZ_DE | CM_NO_SVA_DE_FDR_0.05 | 363       | AQP6       |
| SZ_DE | CM_NO_SVA_DE_FDR_0.05 | 100507206 | LINC00943  |
| SZ_DE | CM_NO_SVA_DE_FDR_0.05 | 10460     | TACC3      |
| SZ_DE | CM_NO_SVA_DE_FDR_0.05 | 285193    | DUSP28     |
| SZ_DE | CM_NO_SVA_DE_FDR_0.05 | 3698      | ITIH2      |
| SZ_DE | CM_NO_SVA_DE_FDR_0.05 | 168391    | GALNTL5    |
| SZ_DE | CM_NO_SVA_DE_FDR_0.05 | 9957      | HS3ST1     |
| SZ_DE | CM_NO_SVA_DE_FDR_0.05 | 8646      | CHRD       |
| SZ_DE | CM_NO_SVA_DE_FDR_0.05 | 6687      | SPG7       |
| SZ_DE | CM_NO_SVA_DE_FDR_0.05 | 90485     | ZNF835     |
| SZ_DE | CM_NO_SVA_DE_FDR_0.05 | 4974      | OMG        |
| SZ_DE | CM_NO_SVA_DE_FDR_0.05 | 441869    | ANKRD65    |
| SZ_DE | CM_NO_SVA_DE_FDR_0.05 | 1264      | CNN1       |
| SZ_DE | CM_NO_SVA_DE_FDR_0.05 | 8991      | SELENBP1   |
| SZ_DE | CM_NO_SVA_DE_FDR_0.05 | 150538    | SATB2-AS1  |
| SZ_DE | CM_NO_SVA_DE_FDR_0.05 | 161198    | CLEC14A    |
| SZ_DE | CM_NO_SVA_DE_FDR_0.05 | 654429    | LRTM2      |
| SZ_DE | CM_NO_SVA_DE_FDR_0.05 | 57799     | RAB40C     |
| SZ_DE | CM_NO_SVA_DE_FDR_0.05 | 94097     | SFXN5      |
| SZ_DE | CM_NO_SVA_DE_FDR_0.05 | 192286    | HIGD2A     |
| SZ_DE | CM_NO_SVA_DE_FDR_0.05 | 83444     | INO80B     |
| SZ_DE | CM_NO_SVA_DE_FDR_0.05 | 65996     | MGC2752    |
| SZ_DE | CM_NO_SVA_DE_FDR_0.05 | 283999    | TMEM235    |
| SZ_DE | CM_NO_SVA_DE_FDR_0.05 | 254359    | ZDHHC24    |
| SZ_DE | CM_NO_SVA_DE_FDR_0.05 | 11285     | B4GALT7    |
| SZ_DE | CM_NO_SVA_DE_FDR_0.05 | 9638      | FEZ1       |
| SZ_DE | CM_NO_SVA_DE_FDR_0.05 | 4185      | ADAM11     |
| SZ_DE | CM_NO_SVA_DE_FDR_0.05 | 2647      | BLOC1S1    |
| SZ_DE | CM_NO_SVA_DE_FDR_0.05 | 83482     | SCRT1      |
| SZ_DE | CM_NO_SVA_DE_FDR_0.05 | 9588      | PRDX6      |
| SZ_DE | CM_NO_SVA_DE_FDR_0.05 | 3664      | IRF6       |
| SZ_DE | CM_NO_SVA_DE_FDR_0.05 | 51706     | CYB5R1     |
| SZ_DE | CM_NO_SVA_DE_FDR_0.05 | 388135    | C15orf59   |
| SZ_DE | CM_NO_SVA_DE_FDR_0.05 | 28974     | C19orf53   |
| SZ_DE | CM_NO_SVA_DE_FDR_0.05 | 51693     | TRAPPC2L   |

|       |                       |           |            |
|-------|-----------------------|-----------|------------|
| SZ_DE | CM_NO_SVA_DE_FDR_0.05 | 10999     | SLC27A4    |
| SZ_DE | CM_NO_SVA_DE_FDR_0.05 | 388341    | FAM211A    |
| SZ_DE | CM_NO_SVA_DE_FDR_0.05 | 29882     | ANAPC2     |
| SZ_DE | CM_NO_SVA_DE_FDR_0.05 | 25900     | IFFO1      |
| SZ_DE | CM_NO_SVA_DE_FDR_0.05 | 1468      | SLC25A10   |
| SZ_DE | CM_NO_SVA_DE_FDR_0.05 | 6035      | RNASE1     |
| SZ_DE | CM_NO_SVA_DE_FDR_0.05 | 2826      | CCR10      |
| SZ_DE | CM_NO_SVA_DE_FDR_0.05 | 100128822 | LINC01003  |
| SZ_DE | CM_NO_SVA_DE_FDR_0.05 | 379       | ARL4D      |
| SZ_DE | CM_NO_SVA_DE_FDR_0.05 | 5605      | MAP2K2     |
| SZ_DE | CM_NO_SVA_DE_FDR_0.05 | 25989     | ULK3       |
| SZ_DE | CM_NO_SVA_DE_FDR_0.05 | 2582      | GALE       |
| SZ_DE | CM_NO_SVA_DE_FDR_0.05 | 9526      | MPDU1      |
| SZ_DE | CM_NO_SVA_DE_FDR_0.05 | 3418      | IDH2       |
| SZ_DE | CM_NO_SVA_DE_FDR_0.05 | 1289      | COL5A1     |
| SZ_DE | CM_NO_SVA_DE_FDR_0.05 | 56954     | NIT2       |
| SZ_DE | CM_NO_SVA_DE_FDR_0.05 | 10268     | RAMP3      |
| SZ_DE | CM_NO_SVA_DE_FDR_0.05 | 2879      | GPX4       |
| SZ_DE | CM_NO_SVA_DE_FDR_0.05 | 9836      | LCMT2      |
| SZ_DE | CM_NO_SVA_DE_FDR_0.05 | 183       | AGT        |
| SZ_DE | CM_NO_SVA_DE_FDR_0.05 | 254559    | LINC00925  |
| SZ_DE | CM_NO_SVA_DE_FDR_0.05 | 114926    | SMIM19     |
| SZ_DE | CM_NO_SVA_DE_FDR_0.05 | 11243     | PMF1       |
| SZ_DE | CM_NO_SVA_DE_FDR_0.05 | 65263     | PYCRL      |
| SZ_DE | CM_NO_SVA_DE_FDR_0.05 | 6415      | SEPW1      |
| SZ_DE | CM_NO_SVA_DE_FDR_0.05 | 2702      | GJA5       |
| SZ_DE | CM_NO_SVA_DE_FDR_0.05 | 1298      | COL9A2     |
| SZ_DE | CM_NO_SVA_DE_FDR_0.05 | 23457     | ABCB9      |
| SZ_DE | CM_NO_SVA_DE_FDR_0.05 | 92745     | SLC38A5    |
| SZ_DE | CM_NO_SVA_DE_FDR_0.05 | 51024     | FIS1       |
| SZ_DE | CM_NO_SVA_DE_FDR_0.05 | 51281     | ANKMY1     |
| SZ_DE | CM_NO_SVA_DE_FDR_0.05 | 128218    | TMEM125    |
| SZ_DE | CM_NO_SVA_DE_FDR_0.05 | 4005      | LMO2       |
| SZ_DE | CM_NO_SVA_DE_FDR_0.05 | 80148     | PQLC1      |
| SZ_DE | CM_NO_SVA_DE_FDR_0.05 | 115992    | RNF166     |
| SZ_DE | CM_NO_SVA_DE_FDR_0.05 | 1132      | CHRM4      |
| SZ_DE | CM_NO_SVA_DE_FDR_0.05 | 7923      | HSD17B8    |
| SZ_DE | CM_NO_SVA_DE_FDR_0.05 | 84279     | PRADC1     |
| SZ_DE | CM_NO_SVA_DE_FDR_0.05 | 5871      | MAP4K2     |
| SZ_DE | CM_NO_SVA_DE_FDR_0.05 | 1299      | COL9A3     |
| SZ_DE | CM_NO_SVA_DE_FDR_0.05 | 25946     | ZNF385A    |
| SZ_DE | CM_NO_SVA_DE_FDR_0.05 | 28988     | DBNL       |
| SZ_DE | CM_NO_SVA_DE_FDR_0.05 | 2356      | FPGS       |
| SZ_DE | CM_NO_SVA_DE_FDR_0.05 | 115708    | TRMT61A    |
| SZ_DE | CM_NO_SVA_DE_FDR_0.05 | 249       | ALPL       |
| SZ_DE | CM_NO_SVA_DE_FDR_0.05 | 100506779 | BZRAP1-AS1 |
| SZ_DE | CM_NO_SVA_DE_FDR_0.05 | 738       | VPS51      |
| SZ_DE | CM_NO_SVA_DE_FDR_0.05 | 54681     | P4HTM      |
| SZ_DE | CM_NO_SVA_DE_FDR_0.05 | 246330    | PELI3      |
| SZ_DE | CM_NO_SVA_DE_FDR_0.05 | 6404      | SELPLG     |
| SZ_DE | CM_NO_SVA_DE_FDR_0.05 | 84269     | CHCHD5     |
| SZ_DE | CM_NO_SVA_DE_FDR_0.05 | 252995    | FNDC5      |
| SZ_DE | CM_NO_SVA_DE_FDR_0.05 | 260434    | PYDC1      |
| SZ_DE | CM_NO_SVA_DE_FDR_0.05 | 9127      | P2RX6      |
| SZ_DE | CM_NO_SVA_DE_FDR_0.05 | 23770     | FKBP8      |
| SZ_DE | CM_NO_SVA_DE_FDR_0.05 | 7965      | AIMP2      |
| SZ_DE | CM_NO_SVA_DE_FDR_0.05 | 9905      | SGSM2      |
| SZ_DE | CM_NO_SVA_DE_FDR_0.05 | 55663     | ZNF446     |

|          |                       |        |            |
|----------|-----------------------|--------|------------|
| SZ_DE    | CM_NO_SVA_DE_FDR_0.05 | 27089  | UQCRQ      |
| SZ_DE    | CM_NO_SVA_DE_FDR_0.05 | 90187  | EMILIN3    |
| SZ_DE    | CM_NO_SVA_DE_FDR_0.05 | 56904  | SH3GLB2    |
| SZ_DE    | CM_NO_SVA_DE_FDR_0.05 | 79590  | MRPL24     |
| SZ_DE    | CM_NO_SVA_DE_FDR_0.05 | 90990  | KIFC2      |
| SZ_DE    | CM_NO_SVA_DE_FDR_0.05 | 85378  | TUBGCP6    |
| SZ_DE    | CM_NO_SVA_DE_FDR_0.05 | 90024  | FLJ20021   |
| SZ_DE    | CM_NO_SVA_DE_FDR_0.05 | 1149   | CIDEA      |
| SZ_DE    | CM_NO_SVA_DE_FDR_0.05 | 149345 | SHISA4     |
| SZ_DE    | CM_NO_SVA_DE_FDR_0.05 | 64419  | MTMR14     |
| SZ_DE    | CM_NO_SVA_DE_FDR_0.05 | 80142  | PTGES2     |
| SZ_DE    | CM_NO_SVA_DE_FDR_0.05 | 55851  | PSENE1     |
| SZ_DE    | CM_NO_SVA_DE_FDR_0.05 | 8704   | B4GALT2    |
| SZ_DE    | CM_NO_SVA_DE_FDR_0.05 | 6320   | CLEC11A    |
| SZ_DE    | CM_NO_SVA_DE_FDR_0.05 | 3671   | ISLR       |
| SZ_DE    | CM_NO_SVA_DE_FDR_0.05 | 474344 | GIMAP6     |
| SZ_DE    | CM_NO_SVA_DE_FDR_0.05 | 284111 | SLC13A5    |
| SZ_DE    | CM_NO_SVA_DE_FDR_0.05 | 116349 | C5orf55    |
| SZ_DE    | CM_NO_SVA_DE_FDR_0.05 | 5524   | PPP2R4     |
| SZ_DE    | CM_NO_SVA_DE_FDR_0.05 | 387775 | SLC22A10   |
| SZ_DE    | CM_NO_SVA_DE_FDR_0.05 | 2987   | GUK1       |
| SZ_DE    | CM_NO_SVA_DE_FDR_0.05 | 84628  | NTNG2      |
| SZ_DE    | CM_NO_SVA_DE_FDR_0.05 | 89932  | PAPLN      |
| SZ_DE    | CM_NO_SVA_DE_FDR_0.05 | 54461  | FBXW5      |
| SZ_DE    | CM_NO_SVA_DE_FDR_0.05 | 113791 | PIK3IP1    |
| SZ_DE    | CM_NO_SVA_DE_FDR_0.05 | 631    | BFSP1      |
| SZ_DE    | CM_NO_SVA_DE_FDR_0.05 | 2134   | EXTL1      |
| SZ_DE    | CM_NO_SVA_DE_FDR_0.05 | 57795  | BRINP2     |
| SZ_DE    | CM_NO_SVA_DE_FDR_0.05 | 55652  | SLC48A1    |
| SZ_DE    | CM_NO_SVA_DE_FDR_0.05 | 253982 | ASPHD1     |
| SZ_DE    | CM_NO_SVA_DE_FDR_0.05 | 129807 | NEU4       |
| SZ_DE    | CM_NO_SVA_DE_FDR_0.05 | 25906  | ANAPC15    |
| SZ_DE    | CM_NO_SVA_DE_FDR_0.05 | 2954   | GSTZ1      |
| SZ_DE    | CM_NO_SVA_DE_FDR_0.05 | 348751 | FTCDNL1    |
| SZ_DE    | CM_NO_SVA_DE_FDR_0.05 | 80737  | VWA7       |
| SZ_DE    | CM_NO_SVA_DE_FDR_0.05 | 22845  | DOLK       |
| SZ_DE    | CM_NO_SVA_DE_FDR_0.05 | 1307   | COL16A1    |
| SZ_DE    | CM_NO_SVA_DE_FDR_0.05 | 576    | BAI2       |
| SZ_DE    | CM_NO_SVA_DE_FDR_0.05 | 57128  | LYRM4      |
| SZ_DE    | CM_NO_SVA_DE_FDR_0.05 | 128240 | APOA1BP    |
| SZ_DE    | CM_NO_SVA_DE_FDR_0.05 | 6231   | RPS26      |
| SZ_DE    | CM_NO_SVA_DE_FDR_0.05 | 55808  | ST6GALNAC1 |
| SZ_DE    | CM_NO_SVA_DE_FDR_0.05 | 8861   | LDB1       |
| NPD_Sets | ASD-candidates        | 55624  | POMGNT1    |
| NPD_Sets | ASD-candidates        | 6121   | RPE65      |
| NPD_Sets | ASD-candidates        | 1806   | DPYD       |
| NPD_Sets | ASD-candidates        | 9378   | NRXN1      |
| NPD_Sets | ASD-candidates        | 4867   | NPHP1      |
| NPD_Sets | ASD-candidates        | 55777  | MBD5       |
| NPD_Sets | ASD-candidates        | 6323   | SCN1A      |
| NPD_Sets | ASD-candidates        | 23314  | SATB2      |
| NPD_Sets | ASD-candidates        | 686    | BTD        |
| NPD_Sets | ASD-candidates        | 27086  | FOXP1      |
| NPD_Sets | ASD-candidates        | 8492   | PRSS12     |
| NPD_Sets | ASD-candidates        | 25836  | NIPBL      |
| NPD_Sets | ASD-candidates        | 4208   | MEF2C      |
| NPD_Sets | ASD-candidates        | 501    | ALDH7A1    |
| NPD_Sets | ASD-candidates        | 64324  | NSD1       |

|          |                |        |          |
|----------|----------------|--------|----------|
| NPD_Sets | ASD-candidates | 7915   | ALDH5A1  |
| NPD_Sets | ASD-candidates | 8831   | SYNGAP1  |
| NPD_Sets | ASD-candidates | 54806  | AHI1     |
| NPD_Sets | ASD-candidates | 3198   | HOXA1    |
| NPD_Sets | ASD-candidates | 673    | BRAF     |
| NPD_Sets | ASD-candidates | 26047  | CNTNAP2  |
| NPD_Sets | ASD-candidates | 138050 | HGSNAT   |
| NPD_Sets | ASD-candidates | 55636  | CHD7     |
| NPD_Sets | ASD-candidates | 157680 | VPS13B   |
| NPD_Sets | ASD-candidates | 6812   | STXBP1   |
| NPD_Sets | ASD-candidates | 10585  | POMT1    |
| NPD_Sets | ASD-candidates | 7248   | TSC1     |
| NPD_Sets | ASD-candidates | 79813  | EHMT1    |
| NPD_Sets | ASD-candidates | 5728   | PTEN     |
| NPD_Sets | ASD-candidates | 2263   | FGFR2    |
| NPD_Sets | ASD-candidates | 3265   | HRAS     |
| NPD_Sets | ASD-candidates | 3481   | IGF2     |
| NPD_Sets | ASD-candidates | 3767   | KCNJ11   |
| NPD_Sets | ASD-candidates | 22941  | SHANK2   |
| NPD_Sets | ASD-candidates | 1717   | DHCR7    |
| NPD_Sets | ASD-candidates | 2348   | FOLR1    |
| NPD_Sets | ASD-candidates | 220296 | HEPACAM  |
| NPD_Sets | ASD-candidates | 775    | CACNA1C  |
| NPD_Sets | ASD-candidates | 2904   | GRIN2B   |
| NPD_Sets | ASD-candidates | 3845   | KRAS     |
| NPD_Sets | ASD-candidates | 2799   | GNS      |
| NPD_Sets | ASD-candidates | 80184  | CEP290   |
| NPD_Sets | ASD-candidates | 5053   | PAH      |
| NPD_Sets | ASD-candidates | 5781   | PTPN11   |
| NPD_Sets | ASD-candidates | 2290   | FOXG1    |
| NPD_Sets | ASD-candidates | 79944  | L2HGDH   |
| NPD_Sets | ASD-candidates | 7337   | UBE3A    |
| NPD_Sets | ASD-candidates | 2628   | GATM     |
| NPD_Sets | ASD-candidates | 5604   | MAP2K1   |
| NPD_Sets | ASD-candidates | 7249   | TSC2     |
| NPD_Sets | ASD-candidates | 1387   | CREBBP   |
| NPD_Sets | ASD-candidates | 23322  | RPGRIP1L |
| NPD_Sets | ASD-candidates | 7531   | YWHAE    |
| NPD_Sets | ASD-candidates | 5048   | PAFAH1B1 |
| NPD_Sets | ASD-candidates | 3000   | GUCY2D   |
| NPD_Sets | ASD-candidates | 10743  | RAI1     |
| NPD_Sets | ASD-candidates | 84282  | RNF135   |
| NPD_Sets | ASD-candidates | 4763   | NF1      |
| NPD_Sets | ASD-candidates | 4669   | NAGLU    |
| NPD_Sets | ASD-candidates | 6448   | SGSH     |
| NPD_Sets | ASD-candidates | 2593   | GAMT     |
| NPD_Sets | ASD-candidates | 4784   | NFIX     |
| NPD_Sets | ASD-candidates | 1760   | DMPK     |
| NPD_Sets | ASD-candidates | 8195   | MKKS     |
| NPD_Sets | ASD-candidates | 6899   | TBX1     |
| NPD_Sets | ASD-candidates | 158    | ADSL     |
| NPD_Sets | ASD-candidates | 85358  | SHANK3   |
| NPD_Sets | ASD-candidates | 57502  | NLGN4X   |
| NPD_Sets | ASD-candidates | 8905   | AP1S2    |
| NPD_Sets | ASD-candidates | 4810   | NHS      |
| NPD_Sets | ASD-candidates | 6792   | CDKL5    |
| NPD_Sets | ASD-candidates | 139411 | PTCHD1   |
| NPD_Sets | ASD-candidates | 170302 | ARX      |

|          |                |        |          |
|----------|----------------|--------|----------|
| NPD_Sets | ASD-candidates | 11141  | IL1RAPL1 |
| NPD_Sets | ASD-candidates | 1756   | DMD      |
| NPD_Sets | ASD-candidates | 5009   | OTC      |
| NPD_Sets | ASD-candidates | 8573   | CASK     |
| NPD_Sets | ASD-candidates | 4693   | NDP      |
| NPD_Sets | ASD-candidates | 641339 | ZNF674   |
| NPD_Sets | ASD-candidates | 6853   | SYN1     |
| NPD_Sets | ASD-candidates | 347344 | ZNF81    |
| NPD_Sets | ASD-candidates | 24140  | FTSJ1    |
| NPD_Sets | ASD-candidates | 10084  | PQBP1    |
| NPD_Sets | ASD-candidates | 778    | CACNA1F  |
| NPD_Sets | ASD-candidates | 23096  | IQSEC2   |
| NPD_Sets | ASD-candidates | 8243   | SMC1A    |
| NPD_Sets | ASD-candidates | 23133  | PHF8     |
| NPD_Sets | ASD-candidates | 2245   | FGD1     |
| NPD_Sets | ASD-candidates | 4983   | OPHN1    |
| NPD_Sets | ASD-candidates | 9968   | MED12    |
| NPD_Sets | ASD-candidates | 54413  | NLGN3    |
| NPD_Sets | ASD-candidates | 340533 | KIAA2022 |
| NPD_Sets | ASD-candidates | 546    | ATRX     |
| NPD_Sets | ASD-candidates | 57526  | PCDH19   |
| NPD_Sets | ASD-candidates | 2182   | ACSL4    |
| NPD_Sets | ASD-candidates | 1641   | DCX      |
| NPD_Sets | ASD-candidates | 186    | AGTR2    |
| NPD_Sets | ASD-candidates | 65109  | UPF3B    |
| NPD_Sets | ASD-candidates | 3920   | LAMP2    |
| NPD_Sets | ASD-candidates | 2892   | GRIA3    |
| NPD_Sets | ASD-candidates | 4952   | OCRL     |
| NPD_Sets | ASD-candidates | 84295  | PHF6     |
| NPD_Sets | ASD-candidates | 10479  | SLC9A6   |
| NPD_Sets | ASD-candidates | 9459   | ARHGEF6  |
| NPD_Sets | ASD-candidates | 2332   | FMR1     |
| NPD_Sets | ASD-candidates | 2334   | AFF2     |
| NPD_Sets | ASD-candidates | 6535   | SLC6A8   |
| NPD_Sets | ASD-candidates | 3897   | L1CAM    |
| NPD_Sets | ASD-candidates | 4204   | MECP2    |
| NPD_Sets | ASD-candidates | 116442 | RAB39B   |
| NPD_Sets | ASD-denovo-lof | 155038 | GIMAP8   |
| NPD_Sets | ASD-denovo-lof | 667    | DST      |
| NPD_Sets | ASD-denovo-lof | 5118   | PCOLCE   |
| NPD_Sets | ASD-denovo-lof | 93100  | NAPRT1   |
| NPD_Sets | ASD-denovo-lof | 401667 | OR51A2   |
| NPD_Sets | ASD-denovo-lof | 1767   | DNAH5    |
| NPD_Sets | ASD-denovo-lof | 9958   | USP15    |
| NPD_Sets | ASD-denovo-lof | 9056   | SLC7A7   |
| NPD_Sets | ASD-denovo-lof | 55015  | PRPF39   |
| NPD_Sets | ASD-denovo-lof | 5649   | RELN     |
| NPD_Sets | ASD-denovo-lof | 84919  | PPP1R15B |
| NPD_Sets | ASD-denovo-lof | 6738   | TROVE2   |
| NPD_Sets | ASD-denovo-lof | 22999  | RIMS1    |
| NPD_Sets | ASD-denovo-lof | 54737  | MPHOSPH8 |
| NPD_Sets | ASD-denovo-lof | 6326   | SCN2A    |
| NPD_Sets | ASD-denovo-lof | 285175 | UNC80    |
| NPD_Sets | ASD-denovo-lof | 8029   | CUBN     |
| NPD_Sets | ASD-denovo-lof | 374786 | EFCAB5   |
| NPD_Sets | ASD-denovo-lof | 221981 | THSD7A   |
| NPD_Sets | ASD-denovo-lof | 10788  | IQGAP2   |
| NPD_Sets | ASD-denovo-lof | 23394  | ADNP     |

|          |                |           |                  |
|----------|----------------|-----------|------------------|
| NPD_Sets | ASD-denovo-lof | 343413    | FCRL6            |
| NPD_Sets | ASD-denovo-lof | 51107     | APH1A            |
| NPD_Sets | ASD-denovo-lof | 221178    | SPATA13          |
| NPD_Sets | ASD-denovo-lof | 55773     | TBC1D23          |
| NPD_Sets | ASD-denovo-lof | 4036      | LRP2             |
| NPD_Sets | ASD-denovo-lof | 51111     | SUV420H1         |
| NPD_Sets | ASD-denovo-lof | 51127     | TRIM17           |
| NPD_Sets | ASD-denovo-lof | 9320      | TRIP12           |
| NPD_Sets | ASD-denovo-lof | 8452      | CUL3             |
| NPD_Sets | ASD-denovo-lof | 23503     | ZFYVE26          |
| NPD_Sets | ASD-denovo-lof | 374378    | GALNT18          |
| NPD_Sets | ASD-denovo-lof | 80332     | ADAM33           |
| NPD_Sets | ASD-denovo-lof | 2109      | ETFB             |
| NPD_Sets | ASD-denovo-lof | 100534611 | TM4SF19-TCTEX1D2 |
| NPD_Sets | ASD-denovo-lof | 481       | ATP1B1           |
| NPD_Sets | ASD-denovo-lof | 728635    | DHRS4L1          |
| NPD_Sets | ASD-denovo-lof | 23135     | KDM6B            |
| NPD_Sets | ASD-denovo-lof | 28514     | DLL1             |
| NPD_Sets | ASD-denovo-lof | 55799     | CACNA2D3         |
| NPD_Sets | ASD-denovo-lof | 9378      | NRXN1            |
| NPD_Sets | ASD-denovo-lof | 5253      | PHF2             |
| NPD_Sets | ASD-denovo-lof | 7812      | CSDE1            |
| NPD_Sets | ASD-denovo-lof | 5862      | RAB2A            |
| NPD_Sets | ASD-denovo-lof | 57556     | SEMA6A           |
| NPD_Sets | ASD-denovo-lof | 157769    | FAM91A1          |
| NPD_Sets | ASD-denovo-lof | 83473     | KATNAL2          |
| NPD_Sets | ASD-denovo-lof | 8803      | SUCLA2           |
| NPD_Sets | ASD-denovo-lof | 8493      | PPM1D            |
| NPD_Sets | ASD-denovo-lof | 166752    | FREM3            |
| NPD_Sets | ASD-denovo-lof | 9891      | NUAK1            |
| NPD_Sets | ASD-denovo-lof | 5079      | PAX5             |
| NPD_Sets | ASD-denovo-lof | 10716     | TBR1             |
| NPD_Sets | ASD-denovo-lof | 29850     | TRPM5            |
| NPD_Sets | ASD-denovo-lof | 56136     | PCDHA13          |
| NPD_Sets | ASD-denovo-lof | 56624     | ASAH2            |
| NPD_Sets | ASD-denovo-lof | 23036     | ZNF292           |
| NPD_Sets | ASD-denovo-lof | 6929      | TCF3             |
| NPD_Sets | ASD-denovo-lof | 10787     | NCKAP1           |
| NPD_Sets | ASD-denovo-lof | 23389     | MED13L           |
| NPD_Sets | ASD-denovo-lof | 84622     | ZNF594           |
| NPD_Sets | ASD-denovo-lof | 6342      | SCP2             |
| NPD_Sets | ASD-denovo-lof | 65083     | NOL6             |
| NPD_Sets | ASD-denovo-lof | 32        | ACACB            |
| NPD_Sets | ASD-denovo-lof | 254048    | UBN2             |
| NPD_Sets | ASD-denovo-lof | 9778      | KIAA0232         |
| NPD_Sets | ASD-denovo-lof | 57680     | CHD8             |
| NPD_Sets | ASD-denovo-lof | 83552     | MFRP             |
| NPD_Sets | ASD-denovo-lof | 55777     | MBD5             |
| NPD_Sets | ASD-denovo-lof | 23126     | POGZ             |
| NPD_Sets | ASD-denovo-lof | 83992     | CTTNBP2          |
| NPD_Sets | ASD-denovo-lof | 6840      | SVIL             |
| NPD_Sets | ASD-denovo-lof | 9703      | KIAA0100         |
| NPD_Sets | ASD-denovo-lof | 642636    | RAD21L1          |
| NPD_Sets | ASD-denovo-lof | 3790      | KCNS3            |
| NPD_Sets | ASD-denovo-lof | 5442      | POLRMT           |
| NPD_Sets | ASD-denovo-lof | 696       | BTN1A1           |
| NPD_Sets | ASD-denovo-lof | 23283     | CSTF2T           |
| NPD_Sets | ASD-denovo-lof | 55739     | CARKD            |

|          |                   |           |            |
|----------|-------------------|-----------|------------|
| NPD_Sets | ASD-denovo-lof    | 23181     | DIP2A      |
| NPD_Sets | ASD-denovo-lof    | 4306      | NR3C2      |
| NPD_Sets | ASD-denovo-lof    | 7468      | WHSC1      |
| NPD_Sets | ASD-denovo-lof    | 27332     | ZNF638     |
| NPD_Sets | ASD-denovo-lof    | 22982     | DIP2C      |
| NPD_Sets | ASD-denovo-lof    | 57758     | SCUBE2     |
| NPD_Sets | ASD-denovo-lof    | 116211    | TM4SF19    |
| NPD_Sets | ASD-denovo-lof    | 84570     | COL25A1    |
| NPD_Sets | ASD-denovo-lof    | 10402     | ST3GAL6    |
| NPD_Sets | ASD-denovo-lof    | 7415      | VCP        |
| NPD_Sets | ASD-denovo-lof    | 51439     | FAM8A1     |
| NPD_Sets | ASD-denovo-lof    | 114783    | LMTK3      |
| NPD_Sets | ASD-denovo-lof    | 26046     | LTN1       |
| NPD_Sets | ASD-denovo-lof    | 287       | ANK2       |
| NPD_Sets | ASD-denovo-lof    | 10771     | ZMYND11    |
| NPD_Sets | ASD-denovo-lof    | 3678      | ITGA5      |
| NPD_Sets | ASD-denovo-lof    | 54870     | QRICH1     |
| NPD_Sets | ASD-denovo-lof    | 4774      | NFIA       |
| NPD_Sets | ASD-denovo-lof    | 795       | S100G      |
| NPD_Sets | ASD-denovo-lof    | 6197      | RPS6KA3    |
| NPD_Sets | ASD-denovo-lof    | 51629     | SLC25A39   |
| NPD_Sets | ASD-denovo-lof    | 1842      | ECM2       |
| NPD_Sets | ASD-denovo-lof    | 9578      | CDC42BPB   |
| NPD_Sets | ASD-denovo-lof    | 2312      | FLG        |
| NPD_Sets | ASD-denovo-lof    | 57205     | ATP10D     |
| NPD_Sets | ASD-denovo-lof    | 54014     | BRWD1      |
| NPD_Sets | ASD-denovo-lof    | 22941     | SHANK2     |
| NPD_Sets | ASD-denovo-lof    | 152006    | RNF38      |
| NPD_Sets | ASD-denovo-lof    | 2048      | EPHB2      |
| NPD_Sets | ASD-denovo-lof    | 23001     | WDFY3      |
| NPD_Sets | ASD-denovo-lof    | 54545     | MTMR12     |
| NPD_Sets | ASD-denovo-lof    | 6683      | SPAST      |
| NPD_Sets | ASD-denovo-lof    | 203859    | ANO5       |
| NPD_Sets | ASD-denovo-lof    | 8535      | CBX4       |
| NPD_Sets | ASD-denovo-lof    | 1859      | DYRK1A     |
| NPD_Sets | ASD-denovo-lof    | 6601      | SMARCC2    |
| NPD_Sets | ASD-denovo-lof    | 26262     | TSPAN17    |
| NPD_Sets | ASD-denovo-lof    | 100528021 | ST20-MTHFS |
| NPD_Sets | ASD-denovo-lof    | 6694      | SPP2       |
| NPD_Sets | ASD-denovo-lof    | 10588     | MTHFS      |
| NPD_Sets | ASD-denovo-lof    | 2904      | GRIN2B     |
| NPD_Sets | ASD-denovo-lof    | 4849      | CNOT3      |
| NPD_Sets | ASD-denovo-lof    | 53335     | BCL11A     |
| NPD_Sets | ASD-denovo-lof    | 29072     | SETD2      |
| NPD_Sets | ASD-denovo-lof    | 5364      | PLXNB1     |
| NPD_Sets | ASD-denovo-nonsyn | 6569      | SLC34A1    |
| NPD_Sets | ASD-denovo-nonsyn | 4353      | MPO        |
| NPD_Sets | ASD-denovo-nonsyn | 6098      | ROS1       |
| NPD_Sets | ASD-denovo-nonsyn | 282890    | ZNF311     |
| NPD_Sets | ASD-denovo-nonsyn | 6340      | SCNN1G     |
| NPD_Sets | ASD-denovo-nonsyn | 8658      | TNKS       |
| NPD_Sets | ASD-denovo-nonsyn | 8493      | PPM1D      |
| NPD_Sets | ASD-denovo-nonsyn | 8567      | MADD       |
| NPD_Sets | ASD-denovo-nonsyn | 64854     | USP46      |
| NPD_Sets | ASD-denovo-nonsyn | 5587      | PRKD1      |
| NPD_Sets | ASD-denovo-nonsyn | 84261     | FBXW9      |
| NPD_Sets | ASD-denovo-nonsyn | 56963     | RGMA       |
| NPD_Sets | ASD-denovo-nonsyn | 192286    | HIGD2A     |

|          |                   |        |           |
|----------|-------------------|--------|-----------|
| NPD_Sets | ASD-denovo-nonsyn | 4774   | NFIA      |
| NPD_Sets | ASD-denovo-nonsyn | 7399   | USH2A     |
| NPD_Sets | ASD-denovo-nonsyn | 23363  | OBSL1     |
| NPD_Sets | ASD-denovo-nonsyn | 1956   | EGFR      |
| NPD_Sets | ASD-denovo-nonsyn | 10024  | TROAP     |
| NPD_Sets | ASD-denovo-nonsyn | 50831  | TAS2R3    |
| NPD_Sets | ASD-denovo-nonsyn | 9124   | PDLIM1    |
| NPD_Sets | ASD-denovo-nonsyn | 57758  | SCUBE2    |
| NPD_Sets | ASD-denovo-nonsyn | 94025  | MUC16     |
| NPD_Sets | ASD-denovo-nonsyn | 140453 | MUC17     |
| NPD_Sets | ASD-denovo-nonsyn | 3012   | HIST1H2AE |
| NPD_Sets | ASD-denovo-nonsyn | 26013  | L3MBTL1   |
| NPD_Sets | ASD-denovo-nonsyn | 23189  | KANK1     |
| NPD_Sets | ASD-denovo-nonsyn | 80312  | TET1      |
| NPD_Sets | ASD-denovo-nonsyn | 696    | BTN1A1    |
| NPD_Sets | ASD-denovo-nonsyn | 6389   | SDHA      |
| NPD_Sets | ASD-denovo-nonsyn | 27006  | FGF22     |
| NPD_Sets | ASD-denovo-nonsyn | 1788   | DNMT3A    |
| NPD_Sets | ASD-denovo-nonsyn | 3274   | HRH2      |
| NPD_Sets | ASD-denovo-nonsyn | 63891  | RNF123    |
| NPD_Sets | ASD-denovo-nonsyn | 727897 | MUC5B     |
| NPD_Sets | ASD-denovo-nonsyn | 5296   | PIK3R2    |
| NPD_Sets | ASD-denovo-nonsyn | 6144   | RPL21     |
| NPD_Sets | ASD-denovo-nonsyn | 374977 | MROH7     |
| NPD_Sets | ASD-denovo-nonsyn | 481    | ATP1B1    |
| NPD_Sets | ASD-denovo-nonsyn | 375611 | SLC26A5   |
| NPD_Sets | ASD-denovo-nonsyn | 9858   | PPP1R26   |
| NPD_Sets | ASD-denovo-nonsyn | 776    | CACNA1D   |
| NPD_Sets | ASD-denovo-nonsyn | 57535  | KIAA1324  |
| NPD_Sets | ASD-denovo-nonsyn | 777    | CACNA1E   |
| NPD_Sets | ASD-denovo-nonsyn | 10771  | ZMYND11   |
| NPD_Sets | ASD-denovo-nonsyn | 374739 | TEPP      |
| NPD_Sets | ASD-denovo-nonsyn | 5990   | RFX2      |
| NPD_Sets | ASD-denovo-nonsyn | 55160  | ARHGEF10L |
| NPD_Sets | ASD-denovo-nonsyn | 6529   | SLC6A1    |
| NPD_Sets | ASD-denovo-nonsyn | 479    | ATP12A    |
| NPD_Sets | ASD-denovo-nonsyn | 728635 | DHRS4L1   |
| NPD_Sets | ASD-denovo-nonsyn | 6531   | SLC6A3    |
| NPD_Sets | ASD-denovo-nonsyn | 60626  | RIC8A     |
| NPD_Sets | ASD-denovo-nonsyn | 23774  | BRD1      |
| NPD_Sets | ASD-denovo-nonsyn | 731220 | RFX8      |
| NPD_Sets | ASD-denovo-nonsyn | 23476  | BRD4      |
| NPD_Sets | ASD-denovo-nonsyn | 779    | CACNA1S   |
| NPD_Sets | ASD-denovo-nonsyn | 401667 | OR51A2    |
| NPD_Sets | ASD-denovo-nonsyn | 26873  | OPLAH     |
| NPD_Sets | ASD-denovo-nonsyn | 79829  | NAA40     |
| NPD_Sets | ASD-denovo-nonsyn | 2873   | GPS1      |
| NPD_Sets | ASD-denovo-nonsyn | 149628 | PYHIN1    |
| NPD_Sets | ASD-denovo-nonsyn | 200162 | SPAG17    |
| NPD_Sets | ASD-denovo-nonsyn | 4666   | NACA      |
| NPD_Sets | ASD-denovo-nonsyn | 3308   | HSPA4     |
| NPD_Sets | ASD-denovo-nonsyn | 8295   | TRRAP     |
| NPD_Sets | ASD-denovo-nonsyn | 23339  | VPS39     |
| NPD_Sets | ASD-denovo-nonsyn | 3633   | INPP5B    |
| NPD_Sets | ASD-denovo-nonsyn | 4486   | MST1R     |
| NPD_Sets | ASD-denovo-nonsyn | 2262   | GPC5      |
| NPD_Sets | ASD-denovo-nonsyn | 128822 | CST9      |
| NPD_Sets | ASD-denovo-nonsyn | 23294  | ANKS1A    |



|          |                   |           |                |
|----------|-------------------|-----------|----------------|
| NPD_Sets | ASD-denovo-nonsyn | 155038    | GIMAP8         |
| NPD_Sets | ASD-denovo-nonsyn | 114791    | TUBGCP5        |
| NPD_Sets | ASD-denovo-nonsyn | 23181     | DIP2A          |
| NPD_Sets | ASD-denovo-nonsyn | 4154      | MBNL1          |
| NPD_Sets | ASD-denovo-nonsyn | 22982     | DIP2C          |
| NPD_Sets | ASD-denovo-nonsyn | 123096    | SLC25A29       |
| NPD_Sets | ASD-denovo-nonsyn | 1475      | CSTA           |
| NPD_Sets | ASD-denovo-nonsyn | 23135     | KDM6B          |
| NPD_Sets | ASD-denovo-nonsyn | 4648      | MYO7B          |
| NPD_Sets | ASD-denovo-nonsyn | 23503     | ZFYVE26        |
| NPD_Sets | ASD-denovo-nonsyn | 7982      | ST7            |
| NPD_Sets | ASD-denovo-nonsyn | 121457    | IKBIP          |
| NPD_Sets | ASD-denovo-nonsyn | 4208      | MEF2C          |
| NPD_Sets | ASD-denovo-nonsyn | 121340    | SP7            |
| NPD_Sets | ASD-denovo-nonsyn | 25957     | PNISR          |
| NPD_Sets | ASD-denovo-nonsyn | 9777      | TM9SF4         |
| NPD_Sets | ASD-denovo-nonsyn | 2015      | EMR1           |
| NPD_Sets | ASD-denovo-nonsyn | 91752     | ZNF804A        |
| NPD_Sets | ASD-denovo-nonsyn | 219578    | ZNF804B        |
| NPD_Sets | ASD-denovo-nonsyn | 2048      | EPHB2          |
| NPD_Sets | ASD-denovo-nonsyn | 25843     | MOB4           |
| NPD_Sets | ASD-denovo-nonsyn | 51168     | MYO15A         |
| NPD_Sets | ASD-denovo-nonsyn | 4288      | MKI67          |
| NPD_Sets | ASD-denovo-nonsyn | 81        | ACTN4          |
| NPD_Sets | ASD-denovo-nonsyn | 55079     | FEZF2          |
| NPD_Sets | ASD-denovo-nonsyn | 2580      | GAK            |
| NPD_Sets | ASD-denovo-nonsyn | 100885850 | PTGES3L-AARSD1 |
| NPD_Sets | ASD-denovo-nonsyn | 8532      | CPZ            |
| NPD_Sets | ASD-denovo-nonsyn | 54439     | RBM27          |
| NPD_Sets | ASD-denovo-nonsyn | 55262     | C7orf43        |
| NPD_Sets | ASD-denovo-nonsyn | 5519      | PPP2R1B        |
| NPD_Sets | ASD-denovo-nonsyn | 253782    | CERS6          |
| NPD_Sets | ASD-denovo-nonsyn | 6305      | SBF1           |
| NPD_Sets | ASD-denovo-nonsyn | 81846     | SBF2           |
| NPD_Sets | ASD-denovo-nonsyn | 10514     | MYBBP1A        |
| NPD_Sets | ASD-denovo-nonsyn | 26154     | ABCA12         |
| NPD_Sets | ASD-denovo-nonsyn | 154664    | ABCA13         |
| NPD_Sets | ASD-denovo-nonsyn | 130733    | TMEM178A       |
| NPD_Sets | ASD-denovo-nonsyn | 26262     | TSPAN17        |
| NPD_Sets | ASD-denovo-nonsyn | 60492     | CCDC90B        |
| NPD_Sets | ASD-denovo-nonsyn | 9901      | SRGAP3         |
| NPD_Sets | ASD-denovo-nonsyn | 114815    | SORCS1         |
| NPD_Sets | ASD-denovo-nonsyn | 167410    | LIX1           |
| NPD_Sets | ASD-denovo-nonsyn | 6323      | SCN1A          |
| NPD_Sets | ASD-denovo-nonsyn | 90121     | TSR2           |
| NPD_Sets | ASD-denovo-nonsyn | 8220      | DGCR14         |
| NPD_Sets | ASD-denovo-nonsyn | 5978      | REST           |
| NPD_Sets | ASD-denovo-nonsyn | 6929      | TCF3           |
| NPD_Sets | ASD-denovo-nonsyn | 4763      | NF1            |
| NPD_Sets | ASD-denovo-nonsyn | 27148     | STK36          |
| NPD_Sets | ASD-denovo-nonsyn | 5430      | POLR2A         |
| NPD_Sets | ASD-denovo-nonsyn | 8607      | RUVBL1         |
| NPD_Sets | ASD-denovo-nonsyn | 23474     | ETHE1          |
| NPD_Sets | ASD-denovo-nonsyn | 81488     | POLR2M         |
| NPD_Sets | ASD-denovo-nonsyn | 30846     | EHD2           |
| NPD_Sets | ASD-denovo-nonsyn | 2312      | FLG            |
| NPD_Sets | ASD-denovo-nonsyn | 83439     | TCF7L1         |
| NPD_Sets | ASD-denovo-nonsyn | 84498     | FAM120B        |

|          |                   |           |            |
|----------|-------------------|-----------|------------|
| NPD_Sets | ASD-denovo-nonsyn | 5604      | MAP2K1     |
| NPD_Sets | ASD-denovo-nonsyn | 5213      | PFKM       |
| NPD_Sets | ASD-denovo-nonsyn | 3728      | JUP        |
| NPD_Sets | ASD-denovo-nonsyn | 80310     | PDGFD      |
| NPD_Sets | ASD-denovo-nonsyn | 23168     | RTF1       |
| NPD_Sets | ASD-denovo-nonsyn | 124274    | GPR139     |
| NPD_Sets | ASD-denovo-nonsyn | 23223     | RRP12      |
| NPD_Sets | ASD-denovo-nonsyn | 54853     | WDR55      |
| NPD_Sets | ASD-denovo-nonsyn | 8943      | AP3D1      |
| NPD_Sets | ASD-denovo-nonsyn | 55015     | PRPF39     |
| NPD_Sets | ASD-denovo-nonsyn | 345       | APOC3      |
| NPD_Sets | ASD-denovo-nonsyn | 9536      | PTGES      |
| NPD_Sets | ASD-denovo-nonsyn | 25831     | HECTD1     |
| NPD_Sets | ASD-denovo-nonsyn | 51127     | TRIM17     |
| NPD_Sets | ASD-denovo-nonsyn | 8940      | TOP3B      |
| NPD_Sets | ASD-denovo-nonsyn | 57448     | BIRC6      |
| NPD_Sets | ASD-denovo-nonsyn | 10330     | CNPY2      |
| NPD_Sets | ASD-denovo-nonsyn | 51163     | DBR1       |
| NPD_Sets | ASD-denovo-nonsyn | 5187      | PER1       |
| NPD_Sets | ASD-denovo-nonsyn | 3185      | HNRNPF     |
| NPD_Sets | ASD-denovo-nonsyn | 26046     | LTN1       |
| NPD_Sets | ASD-denovo-nonsyn | 54682     | MANSC1     |
| NPD_Sets | ASD-denovo-nonsyn | 94239     | H2AFV      |
| NPD_Sets | ASD-denovo-nonsyn | 26115     | TANC2      |
| NPD_Sets | ASD-denovo-nonsyn | 81930     | KIF18A     |
| NPD_Sets | ASD-denovo-nonsyn | 9870      | AREL1      |
| NPD_Sets | ASD-denovo-nonsyn | 4087      | SMAD2      |
| NPD_Sets | ASD-denovo-nonsyn | 301       | ANXA1      |
| NPD_Sets | ASD-denovo-nonsyn | 8749      | ADAM18     |
| NPD_Sets | ASD-denovo-nonsyn | 79730     | NSUN7      |
| NPD_Sets | ASD-denovo-nonsyn | 7007      | TECTA      |
| NPD_Sets | ASD-denovo-nonsyn | 4602      | MYB        |
| NPD_Sets | ASD-denovo-nonsyn | 84059     | GPR98      |
| NPD_Sets | ASD-denovo-nonsyn | 2778      | GNAS       |
| NPD_Sets | ASD-denovo-nonsyn | 4317      | MMP8       |
| NPD_Sets | ASD-denovo-nonsyn | 100529241 | HSPE1-MOB4 |
| NPD_Sets | ASD-denovo-nonsyn | 53335     | BCL11A     |
| NPD_Sets | ASD-denovo-nonsyn | 148811    | PM20D1     |
| NPD_Sets | ASD-denovo-nonsyn | 7204      | TRIO       |
| NPD_Sets | ASD-denovo-nonsyn | 5047      | PAEP       |
| NPD_Sets | ASD-denovo-nonsyn | 342132    | ZNF774     |
| NPD_Sets | ASD-denovo-nonsyn | 57584     | ARHGAP21   |
| NPD_Sets | ASD-denovo-nonsyn | 84063     | KIRREL2    |
| NPD_Sets | ASD-denovo-nonsyn | 64924     | SLC30A5    |
| NPD_Sets | ASD-denovo-nonsyn | 167465    | ZNF366     |
| NPD_Sets | ASD-denovo-nonsyn | 84623     | KIRREL3    |
| NPD_Sets | ASD-denovo-nonsyn | 2         | A2M        |
| NPD_Sets | ASD-denovo-nonsyn | 5862      | RAB2A      |
| NPD_Sets | ASD-denovo-nonsyn | 26509     | MYOF       |
| NPD_Sets | ASD-denovo-nonsyn | 9958      | USP15      |
| NPD_Sets | ASD-denovo-nonsyn | 54934     | KANSL2     |
| NPD_Sets | ASD-denovo-nonsyn | 83473     | KATNAL2    |
| NPD_Sets | ASD-denovo-nonsyn | 23255     | SOGA2      |
| NPD_Sets | ASD-denovo-nonsyn | 57828     | CATSPERG   |
| NPD_Sets | ASD-denovo-nonsyn | 387104    | SOGA3      |
| NPD_Sets | ASD-denovo-nonsyn | 10553     | HTATIP2    |
| NPD_Sets | ASD-denovo-nonsyn | 26233     | FBXL6      |
| NPD_Sets | ASD-denovo-nonsyn | 6694      | SPP2       |

|          |                   |        |          |
|----------|-------------------|--------|----------|
| NPD_Sets | ASD-denovo-nonsyn | 7059   | THBS3    |
| NPD_Sets | ASD-denovo-nonsyn | 9320   | TRIP12   |
| NPD_Sets | ASD-denovo-nonsyn | 83959  | SLC4A11  |
| NPD_Sets | ASD-denovo-nonsyn | 1797   | DOM3Z    |
| NPD_Sets | ASD-denovo-nonsyn | 80344  | DCAF11   |
| NPD_Sets | ASD-denovo-nonsyn | 51200  | CPA4     |
| NPD_Sets | ASD-denovo-nonsyn | 10302  | SNAPC5   |
| NPD_Sets | ASD-denovo-nonsyn | 55746  | NUP133   |
| NPD_Sets | ASD-denovo-nonsyn | 10788  | IQGAP2   |
| NPD_Sets | ASD-denovo-nonsyn | 23019  | CNOT1    |
| NPD_Sets | ASD-denovo-nonsyn | 128239 | IQGAP3   |
| NPD_Sets | ASD-denovo-nonsyn | 4849   | CNOT3    |
| NPD_Sets | ASD-denovo-nonsyn | 4850   | CNOT4    |
| NPD_Sets | ASD-denovo-nonsyn | 1258   | CNGB1    |
| NPD_Sets | ASD-denovo-nonsyn | 57472  | CNOT6    |
| NPD_Sets | ASD-denovo-nonsyn | 5253   | PHF2     |
| NPD_Sets | ASD-denovo-nonsyn | 23469  | PHF3     |
| NPD_Sets | ASD-denovo-nonsyn | 147798 | TMC4     |
| NPD_Sets | ASD-denovo-nonsyn | 9778   | KIAA0232 |
| NPD_Sets | ASD-denovo-nonsyn | 11224  | RPL35    |
| NPD_Sets | ASD-denovo-nonsyn | 84952  | CGNL1    |
| NPD_Sets | ASD-denovo-nonsyn | 6491   | STIL     |
| NPD_Sets | ASD-denovo-nonsyn | 4193   | MDM2     |
| NPD_Sets | ASD-denovo-nonsyn | 3382   | ICA1     |
| NPD_Sets | ASD-denovo-nonsyn | 10130  | PDIA6    |
| NPD_Sets | ASD-denovo-nonsyn | 51019  | CCDC53   |
| NPD_Sets | ASD-denovo-nonsyn | 51678  | MPP6     |
| NPD_Sets | ASD-denovo-nonsyn | 51439  | FAM8A1   |
| NPD_Sets | ASD-denovo-nonsyn | 64770  | CCDC14   |
| NPD_Sets | ASD-denovo-nonsyn | 114571 | SLC22A9  |
| NPD_Sets | ASD-denovo-nonsyn | 22871  | NLGN1    |
| NPD_Sets | ASD-denovo-nonsyn | 79718  | TBL1XR1  |
| NPD_Sets | ASD-denovo-nonsyn | 1787   | TRDMT1   |
| NPD_Sets | ASD-denovo-nonsyn | 23613  | ZMYND8   |
| NPD_Sets | ASD-denovo-nonsyn | 343099 | CCDC18   |
| NPD_Sets | ASD-denovo-nonsyn | 23036  | ZNF292   |
| NPD_Sets | ASD-denovo-nonsyn | 11132  | CAPN10   |
| NPD_Sets | ASD-denovo-nonsyn | 5728   | PTEN     |
| NPD_Sets | ASD-denovo-nonsyn | 8562   | DENR     |
| NPD_Sets | ASD-denovo-nonsyn | 7760   | ZNF213   |
| NPD_Sets | ASD-denovo-nonsyn | 7762   | ZNF215   |
| NPD_Sets | ASD-denovo-nonsyn | 128368 | OR10Z1   |
| NPD_Sets | ASD-denovo-nonsyn | 3996   | LLGL1    |
| NPD_Sets | ASD-denovo-nonsyn | 10343  | PKDREJ   |
| NPD_Sets | ASD-denovo-nonsyn | 317    | APAF1    |
| NPD_Sets | ASD-denovo-nonsyn | 32     | ACACB    |
| NPD_Sets | ASD-denovo-nonsyn | 64409  | WBSCR17  |
| NPD_Sets | ASD-denovo-nonsyn | 643338 | C15orf62 |
| NPD_Sets | ASD-denovo-nonsyn | 93100  | NAPRT1   |
| NPD_Sets | ASD-denovo-nonsyn | 90407  | TMEM41A  |
| NPD_Sets | ASD-denovo-nonsyn | 6342   | SCP2     |
| NPD_Sets | ASD-denovo-nonsyn | 196385 | DNAH10   |
| NPD_Sets | ASD-denovo-nonsyn | 3316   | HSPB2    |
| NPD_Sets | ASD-denovo-nonsyn | 8518   | IKBKAP   |
| NPD_Sets | ASD-denovo-nonsyn | 8701   | DNAH11   |
| NPD_Sets | ASD-denovo-nonsyn | 9578   | CDC42BPB |
| NPD_Sets | ASD-denovo-nonsyn | 114783 | LMTK3    |
| NPD_Sets | ASD-denovo-nonsyn | 8632   | DNAH17   |

|          |                   |           |          |
|----------|-------------------|-----------|----------|
| NPD_Sets | ASD-denovo-nonsyn | 3913      | LAMB2    |
| NPD_Sets | ASD-denovo-nonsyn | 3914      | LAMB3    |
| NPD_Sets | ASD-denovo-nonsyn | 138009    | DCAF4L2  |
| NPD_Sets | ASD-denovo-nonsyn | 344558    | SH3RF3   |
| NPD_Sets | ASD-denovo-nonsyn | 27183     | VPS4A    |
| NPD_Sets | ASD-denovo-nonsyn | 8777      | MPDZ     |
| NPD_Sets | ASD-denovo-nonsyn | 26003     | GORASP2  |
| NPD_Sets | ASD-denovo-nonsyn | 51629     | SLC25A39 |
| NPD_Sets | ASD-denovo-nonsyn | 4035      | LRP1     |
| NPD_Sets | ASD-denovo-nonsyn | 4036      | LRP2     |
| NPD_Sets | ASD-denovo-nonsyn | 27010     | TPK1     |
| NPD_Sets | ASD-denovo-nonsyn | 5118      | PCOLCE   |
| NPD_Sets | ASD-denovo-nonsyn | 10072     | DPP3     |
| NPD_Sets | ASD-denovo-nonsyn | 8216      | LZTR1    |
| NPD_Sets | ASD-denovo-nonsyn | 57664     | PLEKHA4  |
| NPD_Sets | ASD-denovo-nonsyn | 4041      | LRP5     |
| NPD_Sets | ASD-denovo-nonsyn | 51284     | TLR7     |
| NPD_Sets | ASD-denovo-nonsyn | 157769    | FAM91A1  |
| NPD_Sets | ASD-denovo-nonsyn | 114825    | PWWP2A   |
| NPD_Sets | ASD-denovo-nonsyn | 83900     | KRTAP9-3 |
| NPD_Sets | ASD-denovo-nonsyn | 2798      | GNRHR    |
| NPD_Sets | ASD-denovo-nonsyn | 675       | BRCA2    |
| NPD_Sets | ASD-denovo-nonsyn | 51380     | CSAD     |
| NPD_Sets | ASD-denovo-nonsyn | 9734      | HDAC9    |
| NPD_Sets | ASD-denovo-nonsyn | 84725     | PLEKHA8  |
| NPD_Sets | ASD-denovo-nonsyn | 23345     | SYNE1    |
| NPD_Sets | ASD-denovo-nonsyn | 6738      | TROVE2   |
| NPD_Sets | ASD-denovo-nonsyn | 8925      | HERC1    |
| NPD_Sets | ASD-denovo-nonsyn | 79782     | LRRC31   |
| NPD_Sets | ASD-denovo-nonsyn | 79671     | NLRX1    |
| NPD_Sets | ASD-denovo-nonsyn | 4439      | MSH5     |
| NPD_Sets | ASD-denovo-nonsyn | 374786    | EFCAB5   |
| NPD_Sets | ASD-denovo-nonsyn | 57519     | STARD9   |
| NPD_Sets | ASD-denovo-nonsyn | 51234     | EMC4     |
| NPD_Sets | ASD-denovo-nonsyn | 790       | CAD      |
| NPD_Sets | ASD-denovo-nonsyn | 64800     | EFCAB6   |
| NPD_Sets | ASD-denovo-nonsyn | 2956      | MSH6     |
| NPD_Sets | ASD-denovo-nonsyn | 55536     | CDCA7L   |
| NPD_Sets | ASD-denovo-nonsyn | 55773     | TBC1D23  |
| NPD_Sets | ASD-denovo-nonsyn | 400823    | FAM177B  |
| NPD_Sets | ASD-denovo-nonsyn | 54212     | SNTG1    |
| NPD_Sets | ASD-denovo-nonsyn | 171389    | NLRP6    |
| NPD_Sets | ASD-denovo-nonsyn | 254272    | TBC1D28  |
| NPD_Sets | ASD-denovo-nonsyn | 221981    | THSD7A   |
| NPD_Sets | ASD-denovo-nonsyn | 6523      | SLC5A1   |
| NPD_Sets | ASD-denovo-nonsyn | 100885848 | PTGES3L  |
| NPD_Sets | ASD-denovo-nonsyn | 27303     | RBMS3    |
| NPD_Sets | ASD-denovo-nonsyn | 8876      | VNN1     |
| NPD_Sets | ASD-denovo-nonsyn | 84622     | ZNF594   |
| NPD_Sets | ASD-denovo-nonsyn | 9871      | SEC24D   |
| NPD_Sets | ASD-denovo-nonsyn | 795       | S100G    |
| NPD_Sets | ASD-denovo-nonsyn | 11113     | CIT      |
| NPD_Sets | ASD-denovo-nonsyn | 56603     | CYP26B1  |
| NPD_Sets | ASD-denovo-nonsyn | 9891      | NUAK1    |
| NPD_Sets | ASD-denovo-nonsyn | 23102     | TBC1D2B  |
| NPD_Sets | ASD-denovo-nonsyn | 259308    | FAM205A  |
| NPD_Sets | ASD-denovo-nonsyn | 27185     | DISC1    |
| NPD_Sets | ASD-denovo-nonsyn | 8803      | SUCLA2   |

|          |                   |           |            |
|----------|-------------------|-----------|------------|
| NPD_Sets | ASD-denovo-nonsyn | 23126     | POGZ       |
| NPD_Sets | ASD-denovo-nonsyn | 55799     | CACNA2D3   |
| NPD_Sets | ASD-denovo-nonsyn | 1981      | EIF4G1     |
| NPD_Sets | ASD-denovo-nonsyn | 6599      | SMARCC1    |
| NPD_Sets | ASD-denovo-nonsyn | 6601      | SMARCC2    |
| NPD_Sets | ASD-denovo-nonsyn | 8535      | CBX4       |
| NPD_Sets | ASD-denovo-nonsyn | 340554    | ZC3H12B    |
| NPD_Sets | ASD-denovo-nonsyn | 57673     | BEND3      |
| NPD_Sets | ASD-denovo-nonsyn | 54596     | L1TD1      |
| NPD_Sets | ASD-denovo-nonsyn | 203062    | TSNARE1    |
| NPD_Sets | ASD-denovo-nonsyn | 56729     | RETN       |
| NPD_Sets | ASD-denovo-nonsyn | 259215    | LY6G6F     |
| NPD_Sets | ASD-denovo-nonsyn | 5649      | RELN       |
| NPD_Sets | ASD-denovo-nonsyn | 146760    | RTN4RL1    |
| NPD_Sets | ASD-denovo-nonsyn | 51720     | UIMC1      |
| NPD_Sets | ASD-denovo-nonsyn | 7846      | TUBA1A     |
| NPD_Sets | ASD-denovo-nonsyn | 6326      | SCN2A      |
| NPD_Sets | ASD-denovo-nonsyn | 10588     | MTHFS      |
| NPD_Sets | ASD-denovo-nonsyn | 10786     | SLC17A3    |
| NPD_Sets | ASD-denovo-nonsyn | 7249      | TSC2       |
| NPD_Sets | ASD-denovo-nonsyn | 100534599 | ISY1-RAB43 |
| NPD_Sets | ASD-denovo-nonsyn | 54861     | SNRK       |
| NPD_Sets | ASD-denovo-nonsyn | 22949     | PTGR1      |
| NPD_Sets | ASD-denovo-nonsyn | 57721     | METTTL14   |
| NPD_Sets | ASD-denovo-nonsyn | 79066     | METTTL16   |
| NPD_Sets | ASD-denovo-nonsyn | 10210     | TOPORS     |
| NPD_Sets | ASD-denovo-nonsyn | 285175    | UNC80      |
| NPD_Sets | ASD-denovo-nonsyn | 6421      | SFPQ       |
| NPD_Sets | ASD-denovo-nonsyn | 53        | ACP2       |
| NPD_Sets | ASD-denovo-nonsyn | 163882    | CNST       |
| NPD_Sets | ASD-denovo-nonsyn | 51527     | GSKIP      |
| NPD_Sets | ASD-denovo-nonsyn | 2904      | GRIN2B     |
| NPD_Sets | ASD-denovo-nonsyn | 64855     | FAM129B    |
| NPD_Sets | ASD-denovo-nonsyn | 22941     | SHANK2     |
| NPD_Sets | ASD-denovo-nonsyn | 23347     | SMCHD1     |
| NPD_Sets | ASD-denovo-nonsyn | 414332    | LCN10      |
| NPD_Sets | ASD-denovo-nonsyn | 285513    | GPRIN3     |
| NPD_Sets | ASD-denovo-nonsyn | 8857      | FCGBP      |
| NPD_Sets | ASD-denovo-nonsyn | 58986     | TMEM8A     |
| NPD_Sets | ASD-denovo-nonsyn | 10451     | VAV3       |
| NPD_Sets | ASD-denovo-nonsyn | 5547      | PRCP       |
| NPD_Sets | ASD-denovo-nonsyn | 115330    | GPR146     |
| NPD_Sets | ASD-denovo-nonsyn | 126017    | ZNF813     |
| NPD_Sets | ASD-denovo-nonsyn | 342908    | ZNF404     |
| NPD_Sets | ASD-denovo-nonsyn | 353274    | ZNF445     |
| NPD_Sets | ASD-denovo-nonsyn | 283375    | SLC39A5    |
| NPD_Sets | ASD-denovo-nonsyn | 7113      | TMPRSS2    |
| NPD_Sets | ASD-denovo-nonsyn | 23288     | IQCE       |
| NPD_Sets | ASD-denovo-nonsyn | 11072     | DUSP14     |
| NPD_Sets | ASD-denovo-nonsyn | 128853    | DUSP15     |
| NPD_Sets | ASD-denovo-nonsyn | 54629     | FAM63B     |
| NPD_Sets | ASD-denovo-nonsyn | 144406    | WDR66      |
| NPD_Sets | ASD-denovo-nonsyn | 1303      | COL12A1    |
| NPD_Sets | ASD-denovo-nonsyn | 5168      | ENPP2      |
| NPD_Sets | ASD-denovo-nonsyn | 9908      | G3BP2      |
| NPD_Sets | ASD-denovo-nonsyn | 8452      | CUL3       |
| NPD_Sets | ASD-denovo-nonsyn | 8065      | CUL5       |
| NPD_Sets | ASD-denovo-nonsyn | 339559    | ZFP69      |

|          |                   |        |          |
|----------|-------------------|--------|----------|
| NPD_Sets | ASD-denovo-nonsyn | 84465  | MEGF11   |
| NPD_Sets | ASD-denovo-nonsyn | 23075  | SWAP70   |
| NPD_Sets | ASD-denovo-nonsyn | 3678   | ITGA5    |
| NPD_Sets | ASD-denovo-nonsyn | 57556  | SEMA6A   |
| NPD_Sets | ASD-denovo-nonsyn | 10716  | TBR1     |
| NPD_Sets | ASD-denovo-nonsyn | 374378 | GALNT18  |
| NPD_Sets | ASD-denovo-nonsyn | 3679   | ITGA7    |
| NPD_Sets | ASD-denovo-nonsyn | 389362 | PSMG4    |
| NPD_Sets | ASD-denovo-nonsyn | 343413 | FCRL6    |
| NPD_Sets | ASD-denovo-nonsyn | 3140   | MR1      |
| NPD_Sets | ASD-denovo-nonsyn | 203    | AK1      |
| NPD_Sets | ASD-denovo-nonsyn | 53616  | ADAM22   |
| NPD_Sets | ASD-denovo-nonsyn | 8573   | CASK     |
| NPD_Sets | ASD-denovo-nonsyn | 83667  | SESN2    |
| NPD_Sets | ASD-denovo-nonsyn | 10787  | NCKAP1   |
| NPD_Sets | ASD-denovo-nonsyn | 84717  | HDGFRP2  |
| NPD_Sets | ASD-denovo-nonsyn | 4583   | MUC2     |
| NPD_Sets | ASD-denovo-nonsyn | 1586   | CYP17A1  |
| NPD_Sets | ASD-denovo-nonsyn | 4585   | MUC4     |
| NPD_Sets | ASD-denovo-nonsyn | 55728  | N4BP2    |
| NPD_Sets | ASD-denovo-nonsyn | 4627   | MYH9     |
| NPD_Sets | ASD-denovo-nonsyn | 55750  | AGK      |
| NPD_Sets | ASD-denovo-nonsyn | 257106 | ARHGAP30 |
| NPD_Sets | ASD-denovo-nonsyn | 4052   | LTBP1    |
| NPD_Sets | ASD-denovo-nonsyn | 7365   | UGT2B10  |
| NPD_Sets | ASD-denovo-nonsyn | 63925  | ZNF335   |
| NPD_Sets | ASD-denovo-nonsyn | 11100  | HNRNPUL1 |
| NPD_Sets | ASD-denovo-nonsyn | 23358  | USP24    |
| NPD_Sets | ASD-denovo-nonsyn | 7840   | ALMS1    |
| NPD_Sets | ASD-denovo-nonsyn | 391189 | OR11L1   |
| NPD_Sets | ASD-denovo-nonsyn | 5627   | PROS1    |
| NPD_Sets | ASD-denovo-nonsyn | 111    | ADCY5    |
| NPD_Sets | ASD-denovo-nonsyn | 152006 | RNF38    |
| NPD_Sets | ASD-denovo-nonsyn | 3619   | INCENP   |
| NPD_Sets | ASD-denovo-nonsyn | 11173  | ADAMTS7  |
| NPD_Sets | ASD-denovo-nonsyn | 221037 | JMJD1C   |
| NPD_Sets | ASD-denovo-nonsyn | 7581   | ZNF33A   |
| NPD_Sets | ASD-denovo-nonsyn | 1105   | CHD1     |
| NPD_Sets | ASD-denovo-nonsyn | 116211 | TM4SF19  |
| NPD_Sets | ASD-denovo-nonsyn | 1106   | CHD2     |
| NPD_Sets | ASD-denovo-nonsyn | 1107   | CHD3     |
| NPD_Sets | ASD-denovo-nonsyn | 971    | CD72     |
| NPD_Sets | ASD-denovo-nonsyn | 6773   | STAT2    |
| NPD_Sets | ASD-denovo-nonsyn | 9918   | NCAPD2   |
| NPD_Sets | ASD-denovo-nonsyn | 55636  | CHD7     |
| NPD_Sets | ASD-denovo-nonsyn | 10847  | SRCAP    |
| NPD_Sets | ASD-denovo-nonsyn | 27086  | FOXP1    |
| NPD_Sets | ASD-denovo-nonsyn | 57680  | CHD8     |
| NPD_Sets | ASD-denovo-nonsyn | 199974 | CYP4Z1   |
| NPD_Sets | ASD-denovo-nonsyn | 1601   | DAB2     |
| NPD_Sets | ASD-denovo-nonsyn | 2996   | GYPE     |
| NPD_Sets | ASD-denovo-nonsyn | 1499   | CTNNB1   |
| NPD_Sets | ASD-denovo-nonsyn | 4051   | CYP4F3   |
| NPD_Sets | ASD-denovo-nonsyn | 200150 | PLD5     |
| NPD_Sets | ASD-denovo-nonsyn | 64478  | CSMD1    |
| NPD_Sets | ASD-denovo-nonsyn | 84812  | PLCD4    |
| NPD_Sets | ASD-denovo-nonsyn | 23195  | MDN1     |
| NPD_Sets | ASD-denovo-nonsyn | 85452  | KIAA1751 |

|          |                   |        |           |
|----------|-------------------|--------|-----------|
| NPD_Sets | ASD-denovo-nonsyn | 55133  | SRBD1     |
| NPD_Sets | ASD-denovo-nonsyn | 26147  | PHF19     |
| NPD_Sets | ASD-denovo-nonsyn | 284827 | KRTAP13-4 |
| NPD_Sets | ASD-denovo-nonsyn | 667    | DST       |
| NPD_Sets | ASD-denovo-nonsyn | 57205  | ATP10D    |
| NPD_Sets | ASD-denovo-nonsyn | 23389  | MED13L    |
| NPD_Sets | ASD-denovo-nonsyn | 27332  | ZNF638    |
| NPD_Sets | ASD-denovo-nonsyn | 1845   | DUSP3     |
| NPD_Sets | ASD-denovo-nonsyn | 27327  | TNRC6A    |
| NPD_Sets | ASD-denovo-nonsyn | 26155  | NOC2L     |
| NPD_Sets | ASD-denovo-nonsyn | 84694  | GJA10     |
| NPD_Sets | ASD-denovo-nonsyn | 404636 | FAM45A    |
| NPD_Sets | ASD-denovo-nonsyn | 51816  | CECR1     |
| NPD_Sets | ASD-denovo-nonsyn | 81050  | OR5AC2    |
| NPD_Sets | ASD-denovo-nonsyn | 79057  | PRRG3     |
| NPD_Sets | ASD-denovo-nonsyn | 57617  | VPS18     |
| NPD_Sets | ASD-denovo-nonsyn | 10319  | LAMC3     |
| NPD_Sets | ASD-denovo-nonsyn | 4921   | DDR2      |
| NPD_Sets | ASD-denovo-nonsyn | 28514  | DLL1      |
| NPD_Sets | ASD-denovo-nonsyn | 2975   | GTF3C1    |
| NPD_Sets | ASD-denovo-nonsyn | 11011  | TLK2      |
| NPD_Sets | ASD-denovo-nonsyn | 1642   | DDB1      |
| NPD_Sets | ASD-denovo-nonsyn | 7536   | SF1       |
| NPD_Sets | ASD-denovo-nonsyn | 4650   | MYO9B     |
| NPD_Sets | ASD-denovo-nonsyn | 2802   | GOLGA3    |
| NPD_Sets | ASD-denovo-nonsyn | 2803   | GOLGA4    |
| NPD_Sets | ASD-denovo-nonsyn | 23077  | MYCBP2    |
| NPD_Sets | ASD-denovo-nonsyn | 5364   | PLXNB1    |
| NPD_Sets | ASD-denovo-nonsyn | 23654  | PLXNB2    |
| NPD_Sets | ASD-denovo-nonsyn | 143689 | PIWIL4    |
| NPD_Sets | ASD-denovo-nonsyn | 2053   | EPHX2     |
| NPD_Sets | ASD-denovo-nonsyn | 7812   | CSDE1     |
| NPD_Sets | ASD-denovo-nonsyn | 23526  | HMHA1     |
| NPD_Sets | ASD-denovo-nonsyn | 54737  | MPHOSPH8  |
| NPD_Sets | ASD-denovo-nonsyn | 4173   | MCM4      |
| NPD_Sets | ASD-denovo-nonsyn | 55631  | LRRC40    |
| NPD_Sets | ASD-denovo-nonsyn | 81031  | SLC2A10   |
| NPD_Sets | ASD-denovo-nonsyn | 23258  | DENND5A   |
| NPD_Sets | ASD-denovo-nonsyn | 160518 | DENND5B   |
| NPD_Sets | ASD-denovo-nonsyn | 84231  | TRAF7     |
| NPD_Sets | ASD-denovo-nonsyn | 81567  | TXNDC5    |
| NPD_Sets | ASD-denovo-nonsyn | 11276  | SYNRG     |
| NPD_Sets | ASD-denovo-nonsyn | 53919  | SLCO1C1   |
| NPD_Sets | ASD-denovo-nonsyn | 9635   | CLCA2     |
| NPD_Sets | ASD-denovo-nonsyn | 6261   | RYR1      |
| NPD_Sets | ASD-denovo-nonsyn | 649    | BMP1      |
| NPD_Sets | ASD-denovo-nonsyn | 10721  | POLQ      |
| NPD_Sets | ASD-denovo-nonsyn | 977    | CD151     |
| NPD_Sets | ASD-denovo-nonsyn | 577    | BAI3      |
| NPD_Sets | ASD-denovo-nonsyn | 5796   | PTPRK     |
| NPD_Sets | ASD-denovo-nonsyn | 9690   | UBE3C     |
| NPD_Sets | ASD-denovo-nonsyn | 5797   | PTPRM     |
| NPD_Sets | ASD-denovo-nonsyn | 4162   | MCAM      |
| NPD_Sets | ASD-denovo-nonsyn | 23394  | ADNP      |
| NPD_Sets | ASD-denovo-nonsyn | 161725 | OTUD7A    |
| NPD_Sets | ASD-denovo-nonsyn | 51111  | SUV420H1  |
| NPD_Sets | ASD-denovo-nonsyn | 23199  | GSE1      |
| NPD_Sets | ASD-denovo-nonsyn | 140883 | ZNF280B   |

|          |                   |        |         |
|----------|-------------------|--------|---------|
| NPD_Sets | ASD-denovo-nonsyn | 64648  | SPANXD  |
| NPD_Sets | ASD-denovo-nonsyn | 171489 | SPANXE  |
| NPD_Sets | ASD-denovo-nonsyn | 285527 | FRYL    |
| NPD_Sets | ASD-denovo-nonsyn | 63035  | BCORL1  |
| NPD_Sets | ASD-denovo-nonsyn | 50839  | TAS2R10 |
| NPD_Sets | ASD-denovo-nonsyn | 6794   | STK11   |
| NPD_Sets | ASD-denovo-nonsyn | 10044  | SH2D3C  |
| NPD_Sets | ASD-denovo-nonsyn | 7051   | TGM1    |
| NPD_Sets | ASD-denovo-nonsyn | 9737   | GPRASP1 |
| NPD_Sets | ASD-denovo-nonsyn | 2335   | FN1     |
| NPD_Sets | ASD-denovo-nonsyn | 7053   | TGM3    |
| NPD_Sets | ASD-denovo-nonsyn | 57510  | XPO5    |
| NPD_Sets | ASD-denovo-nonsyn | 83394  | PITPNM3 |
| NPD_Sets | ASD-denovo-nonsyn | 29072  | SETD2   |
| NPD_Sets | ASD-denovo-nonsyn | 57685  | CACHD1  |
| NPD_Sets | ASD-denovo-nonsyn | 22999  | RIMS1   |
| NPD_Sets | ASD-denovo-nonsyn | 1859   | DYRK1A  |
| NPD_Sets | ASD-denovo-nonsyn | 6840   | SVIL    |
| NPD_Sets | ASD-denovo-nonsyn | 9699   | RIMS2   |
| NPD_Sets | ASD-denovo-nonsyn | 55209  | SETD5   |
| NPD_Sets | ASD-denovo-nonsyn | 2002   | ELK1    |
| NPD_Sets | ASD-denovo-nonsyn | 6734   | SRPR    |
| NPD_Sets | ASD-denovo-nonsyn | 54103  | GSAP    |
| NPD_Sets | ASD-denovo-nonsyn | 27243  | CHMP2A  |
| NPD_Sets | ASD-denovo-nonsyn | 55777  | MBD5    |
| NPD_Sets | ASD-denovo-nonsyn | 29850  | TRPM5   |
| NPD_Sets | ASD-denovo-nonsyn | 642636 | RAD21L1 |
| NPD_Sets | ASD-denovo-nonsyn | 54822  | TRPM7   |
| NPD_Sets | ASD-denovo-nonsyn | 3787   | KCNS1   |
| NPD_Sets | ASD-denovo-nonsyn | 23241  | PACS2   |
| NPD_Sets | ASD-denovo-nonsyn | 3790   | KCNS3   |
| NPD_Sets | ASD-denovo-nonsyn | 3746   | KCNC1   |
| NPD_Sets | ASD-denovo-nonsyn | 3441   | IFNA4   |
| NPD_Sets | ASD-denovo-nonsyn | 344787 | ZNF860  |
| NPD_Sets | ASD-denovo-nonsyn | 2195   | FAT1    |
| NPD_Sets | ASD-denovo-nonsyn | 9203   | ZMYM3   |
| NPD_Sets | ASD-denovo-nonsyn | 26036  | ZNF451  |
| NPD_Sets | ASD-denovo-nonsyn | 3069   | HDLBP   |
| NPD_Sets | ASD-denovo-nonsyn | 6522   | SLC4A2  |
| NPD_Sets | ASD-denovo-nonsyn | 57717  | PCDHB16 |
| NPD_Sets | ASD-denovo-nonsyn | 221188 | GPR114  |
| NPD_Sets | ASD-denovo-nonsyn | 7468   | WHSC1   |
| NPD_Sets | ASD-denovo-nonsyn | 50700  | RDH8    |
| NPD_Sets | ASD-denovo-nonsyn | 64834  | ELOVL1  |
| NPD_Sets | ASD-denovo-nonsyn | 8120   | AP3B2   |
| NPD_Sets | ASD-denovo-nonsyn | 166752 | FREM3   |
| NPD_Sets | ASD-denovo-nonsyn | 84168  | ANTXR1  |
| NPD_Sets | ASD-denovo-nonsyn | 221178 | SPATA13 |
| NPD_Sets | ASD-denovo-nonsyn | 81035  | COLEC12 |
| NPD_Sets | ASD-denovo-nonsyn | 219469 | OR8H1   |
| NPD_Sets | ASD-denovo-nonsyn | 64327  | LMBR1   |
| NPD_Sets | ASD-denovo-nonsyn | 113146 | AHNAK2  |
| NPD_Sets | ASD-denovo-nonsyn | 950    | SCARB2  |
| NPD_Sets | ASD-denovo-nonsyn | 5663   | PSEN1   |
| NPD_Sets | ASD-denovo-nonsyn | 3690   | ITGB3   |
| NPD_Sets | ASD-denovo-nonsyn | 8666   | EIF3G   |
| NPD_Sets | ASD-denovo-nonsyn | 2562   | GABRB3  |
| NPD_Sets | ASD-denovo-nonsyn | 83659  | TEKT1   |



|          |                   |           |            |
|----------|-------------------|-----------|------------|
| NPD_Sets | ASD-denovo-nonsyn | 56131     | PCDHB4     |
| NPD_Sets | ASD-denovo-nonsyn | 9857      | CEP350     |
| NPD_Sets | ASD-denovo-nonsyn | 9797      | TATDN2     |
| NPD_Sets | ASD-denovo-nonsyn | 22993     | HMGXB3     |
| NPD_Sets | ASD-denovo-nonsyn | 6197      | RPS6KA3    |
| NPD_Sets | ASD-denovo-nonsyn | 284254    | DYNAP      |
| NPD_Sets | ASD-denovo-nonsyn | 80332     | ADAM33     |
| NPD_Sets | ASD-denovo-nonsyn | 64207     | IRF2BPL    |
| NPD_Sets | ASD-denovo-nonsyn | 360023    | ZBTB41     |
| NPD_Sets | ASD-denovo-nonsyn | 493       | ATP2B4     |
| NPD_Sets | ASD-denovo-nonsyn | 287       | ANK2       |
| NPD_Sets | ASD-denovo-nonsyn | 55684     | RABL6      |
| NPD_Sets | ASD-denovo-nonsyn | 288       | ANK3       |
| NPD_Sets | ASD-denovo-nonsyn | 203859    | ANO5       |
| NPD_Sets | ASD-denovo-nonsyn | 339122    | RAB43      |
| NPD_Sets | ASD-denovo-nonsyn | 57608     | KIAA1462   |
| NPD_Sets | ASD-denovo-nonsyn | 85453     | TSPYL5     |
| NPD_Sets | ASD-denovo-nonsyn | 206338    | AQPEP      |
| NPD_Sets | ASD-denovo-nonsyn | 4854      | NOTCH3     |
| NPD_Sets | ASD-denovo-nonsyn | 50614     | GALNT9     |
| NPD_Sets | ASD-denovo-nonsyn | 54962     | TIPIN      |
| NPD_Sets | ASD-denovo-nonsyn | 142686    | ASB14      |
| NPD_Sets | ASD-denovo-nonsyn | 79867     | TCTN2      |
| NPD_Sets | ASD-denovo-nonsyn | 9056      | SLC7A7     |
| NPD_Sets | ASD-denovo-nonsyn | 196743    | PAOX       |
| NPD_Sets | ASD-denovo-nonsyn | 84251     | SGIP1      |
| NPD_Sets | ASD-denovo-nonsyn | 9391      | CIAO1      |
| NPD_Sets | ASD-denovo-nonsyn | 3283      | HSD3B1     |
| NPD_Sets | ASD-denovo-nonsyn | 25890     | ABI3BP     |
| NPD_Sets | ASD-denovo-nonsyn | 344752    | AADAACL2   |
| NPD_Sets | ASD-denovo-nonsyn | 100528021 | ST20-MTHFS |
| NPD_Sets | ASD-denovo-nonsyn | 390078    | OR52E6     |
| NPD_Sets | ASD-denovo-nonsyn | 1045      | CDX2       |
| NPD_Sets | ASD-denovo-nonsyn | 6487      | ST3GAL3    |
| NPD_Sets | ASD-denovo-nonsyn | 10402     | ST3GAL6    |
| NPD_Sets | ASD-denovo-nonsyn | 5049      | PAFAH1B2   |
| NPD_Sets | ASD-denovo-nonsyn | 4628      | MYH10      |
| NPD_Sets | ASD-denovo-nonsyn | 590       | BCHE       |
| NPD_Sets | ASD-denovo-nonsyn | 1003      | CDH5       |
| NPD_Sets | ASD-denovo-nonsyn | 4306      | NR3C2      |
| NPD_Sets | ASD-denovo-nonsyn | 23071     | ERP44      |
| NPD_Sets | ASD-denovo-nonsyn | 84519     | ACRBP      |
| NPD_Sets | ASD-denovo-nonsyn | 5578      | PRKCA      |
| NPD_Sets | ASD-denovo-nonsyn | 1605      | DAG1       |
| NPD_Sets | ASD-denovo-nonsyn | 718       | C3         |
| NPD_Sets | ASD-denovo-nonsyn | 5456      | POU3F4     |
| NPD_Sets | ASD-denovo-nonsyn | 5754      | PTK7       |
| NPD_Sets | ASD-denovo-nonsyn | 26094     | DCAF4      |
| NPD_Sets | ASD-denovo-nonsyn | 8816      | DCAF5      |
| NPD_Sets | ASD-denovo-nonsyn | 66002     | CYP4F12    |
| NPD_Sets | ASD-denovo-nonsyn | 23304     | UBR2       |
| NPD_Sets | ASD-denovo-nonsyn | 8985      | PLOD3      |
| NPD_Sets | ASD-denovo-nonsyn | 254048    | UBN2       |
| NPD_Sets | ASD-denovo-nonsyn | 130507    | UBR3       |
| NPD_Sets | ASD-denovo-nonsyn | 9656      | MDC1       |
| NPD_Sets | ASD-denovo-nonsyn | 23283     | CSTF2T     |
| NPD_Sets | ASD-denovo-nonsyn | 390999    | PRAMEF12   |
| NPD_Sets | ASD-denovo-nonsyn | 56624     | ASAH2      |

|          |                   |           |                  |
|----------|-------------------|-----------|------------------|
| NPD_Sets | ASD-denovo-nonsyn | 91614     | DEPDC7           |
| NPD_Sets | ASD-denovo-nonsyn | 54936     | ADPRHL2          |
| NPD_Sets | ASD-denovo-nonsyn | 7273      | TTN              |
| NPD_Sets | ASD-denovo-nonsyn | 8898      | MTMR2            |
| NPD_Sets | ASD-denovo-nonsyn | 89797     | NAV2             |
| NPD_Sets | ASD-denovo-nonsyn | 7837      | PXDN             |
| NPD_Sets | ASD-denovo-nonsyn | 84146     | ZNF644           |
| NPD_Sets | ASD-denovo-nonsyn | 55159     | RFWD3            |
| NPD_Sets | ASD-denovo-nonsyn | 23262     | PPIP5K2          |
| NPD_Sets | ASD-denovo-nonsyn | 23266     | LPHN2            |
| NPD_Sets | ASD-denovo-nonsyn | 66036     | MTMR9            |
| NPD_Sets | ASD-denovo-nonsyn | 89846     | FGD3             |
| NPD_Sets | ASD-denovo-nonsyn | 165904    | XIRP1            |
| NPD_Sets | ASD-denovo-nonsyn | 100534611 | TM4SF19-TCTEX1D2 |
| NPD_Sets | ASD-denovo-nonsyn | 55193     | PBRM1            |
| NPD_Sets | ASD-denovo-nonsyn | 54980     | C2orf42          |
| NPD_Sets | ASD-denovo-nonsyn | 158471    | PRUNE2           |
| NPD_Sets | ASD-denovo-nonsyn | 27340     | UTP20            |
| NPD_Sets | ASD-denovo-nonsyn | 10785     | WDR4             |
| NPD_Sets | ASD-denovo-nonsyn | 144453    | BEST3            |
| NPD_Sets | ASD-denovo-nonsyn | 7025      | NR2F1            |
| NPD_Sets | ASD-denovo-nonsyn | 220001    | VWCE             |
| NPD_Sets | ASD-denovo-nonsyn | 162394    | SLFN5            |
| NPD_Sets | ASD-denovo-nonsyn | 84570     | COL25A1          |
| NPD_Sets | ASD-denovo-nonsyn | 375775    | PNPLA7           |
| NPD_Sets | ASD-denovo-nonsyn | 26005     | C2CD3            |
| NPD_Sets | ASD-denovo-nonsyn | 55739     | CARKD            |
| NPD_Sets | ASD-denovo-nonsyn | 11188     | NISCH            |
| NPD_Sets | ASD-denovo-nonsyn | 8458      | TTF2             |
| NPD_Sets | ASD-denovo-nonsyn | 9024      | BRSK2            |
| NPD_Sets | ASD-denovo-nonsyn | 1660      | DHX9             |
| NPD_Sets | ASD-denovo-nonsyn | 54014     | BRWD1            |
| NPD_Sets | ASD-denovo-nonsyn | 9703      | KIAA0100         |
| NPD_Sets | ASD-denovo-nonsyn | 9611      | NCOR1            |
| NPD_Sets | ASD-denovo-nonsyn | 64118     | DUS1L            |
| NPD_Sets | ASD-denovo-nonsyn | 20        | ABCA2            |
| NPD_Sets | ASD-denovo-nonsyn | 11146     | GLMN             |
| NPD_Sets | ASD-denovo-nonsyn | 157922    | CAMSAP1          |
| NPD_Sets | ASD-denovo-nonsyn | 280       | AMY2B            |
| NPD_Sets | ASD-denovo-nonsyn | 57496     | MKL2             |
| NPD_Sets | ASD-denovo-nonsyn | 2041      | EPHA1            |
| NPD_Sets | ASD-denovo-nonsyn | 57634     | EP400            |
| NPD_Sets | ASD-denovo-nonsyn | 117854    | TRIM6            |
| NPD_Sets | ASD-denovo-nonsyn | 116986    | AGAP2            |
| NPD_Sets | ASD-denovo-nonsyn | 56886     | UGGT1            |
| NPD_Sets | ASD-denovo-nonsyn | 3778      | KCNMA1           |
| NPD_Sets | ASD-denovo-nonsyn | 2200      | FBN1             |
| NPD_Sets | ASD-denovo-nonsyn | 27077     | B9D1             |
| NPD_Sets | ASD-denovo-nonsyn | 1186      | CLCN7            |
| NPD_Sets | ASD-denovo-nonsyn | 5603      | MAPK13           |
| NPD_Sets | ASD-denovo-nonsyn | 22990     | PCNX             |
| NPD_Sets | ASD-denovo-nonsyn | 27352     | SGSM3            |
| NPD_Sets | ASD-denovo-nonsyn | 57140     | RNPEPL1          |
| NPD_Sets | ASD-denovo-nonsyn | 1973      | EIF4A1           |
| NPD_Sets | ASD-denovo-nonsyn | 1144      | CHRND            |
| NPD_Sets | ASD-denovo-nonsyn | 5595      | MAPK3            |
| NPD_Sets | ASD-denovo-nonsyn | 27131     | SNX5             |
| NPD_Sets | ASD-denovo-nonsyn | 27044     | SND1             |

|          |                   |        |          |
|----------|-------------------|--------|----------|
| NPD_Sets | ASD-denovo-nonsyn | 3708   | ITPR1    |
| NPD_Sets | ASD-denovo-nonsyn | 26166  | RGS22    |
| NPD_Sets | ASD-denovo-nonsyn | 9569   | GTF2IRD1 |
| NPD_Sets | ASD-denovo-nonsyn | 146754 | DNAH2    |
| NPD_Sets | ASD-denovo-nonsyn | 390162 | OR5M9    |
| NPD_Sets | ASD-denovo-nonsyn | 6812   | STXBP1   |
| NPD_Sets | ASD-denovo-nonsyn | 23513  | SCRIB    |
| NPD_Sets | ASD-denovo-nonsyn | 1767   | DNAH5    |
| NPD_Sets | ASD-denovo-nonsyn | 6814   | STXBP3   |
| NPD_Sets | ASD-denovo-nonsyn | 222658 | KCTD20   |
| NPD_Sets | ASD-denovo-nonsyn | 1770   | DNAH9    |
| NPD_Sets | ASD-denovo-nonsyn | 7150   | TOP1     |
| NPD_Sets | ASD-denovo-nonsyn | 51107  | APH1A    |
| NPD_Sets | ASD-denovo-nonsyn | 65110  | UPF3A    |
| NPD_Sets | ASD-denovo-nonsyn | 2742   | GLRA2    |
| NPD_Sets | ASD-denovo-nonsyn | 9899   | SV2B     |
| NPD_Sets | ASD-denovo-nonsyn | 54545  | MTMR12   |
| NPD_Sets | ASD-denovo-nonsyn | 5133   | PDCD1    |
| NPD_Sets | ASD-denovo-nonsyn | 23082  | PPRC1    |
| NPD_Sets | ASD-denovo-nonsyn | 26523  | AGO1     |
| NPD_Sets | ASD-denovo-nonsyn | 8408   | ULK1     |
| NPD_Sets | ASD-denovo-nonsyn | 4987   | OPRL1    |
| NPD_Sets | ASD-denovo-nonsyn | 56302  | TRPV5    |
| NPD_Sets | ASD-denovo-nonsyn | 5442   | POLRMT   |
| NPD_Sets | ASD-denovo-nonsyn | 51665  | ASB1     |
| NPD_Sets | ASD-denovo-nonsyn | 4703   | NEB      |
| NPD_Sets | ASD-denovo-nonsyn | 6540   | SLC6A13  |
| NPD_Sets | ASD-denovo-nonsyn | 26040  | SETBP1   |
| NPD_Sets | ASD-denovo-nonsyn | 8554   | PIAS1    |
| NPD_Sets | ASD-denovo-nonsyn | 343450 | KCNT2    |
| NPD_Sets | ASD-denovo-nonsyn | 11218  | DDX20    |
| NPD_Sets | ASD-denovo-nonsyn | 23001  | WDFY3    |
| NPD_Sets | ASD-denovo-nonsyn | 55954  | ZMAT5    |
| NPD_Sets | ASD-denovo-nonsyn | 57670  | KIAA1549 |
| NPD_Sets | ASD-denovo-nonsyn | 147923 | ZNF420   |
| NPD_Sets | ASD-denovo-nonsyn | 154865 | IQUB     |
| NPD_Sets | ASD-denovo-nonsyn | 9096   | TBX18    |
| NPD_Sets | ASD-denovo-nonsyn | 23090  | ZNF423   |
| NPD_Sets | ASD-denovo-nonsyn | 7415   | VCP      |
| NPD_Sets | ASD-denovo-nonsyn | 2109   | ETFB     |
| NPD_Sets | ASD-denovo-nonsyn | 65083  | NOL6     |
| NPD_Sets | ASD-denovo-nonsyn | 11198  | SUPT16H  |
| NPD_Sets | ASD-denovo-nonsyn | 10985  | GCN1L1   |
| NPD_Sets | ASD-denovo-nonsyn | 23405  | DICER1   |
| NPD_Sets | ASD-denovo-nonsyn | 83552  | MFRP     |
| NPD_Sets | ASD-denovo-nonsyn | 79812  | MMRN2    |
| NPD_Sets | ASD-denovo-nonsyn | 346389 | MACC1    |
| NPD_Sets | ASD-denovo-nonsyn | 10886  | NPFFR2   |
| NPD_Sets | ASD-denovo-nonsyn | 2915   | GRM5     |
| NPD_Sets | ASD-denovo-nonsyn | 23660  | ZKSCAN5  |
| NPD_Sets | ASD-denovo-nonsyn | 9126   | SMC3     |
| NPD_Sets | ASD-denovo-nonsyn | 4189   | DNAJB9   |
| NPD_Sets | ASD-denovo-nonsyn | 2917   | GRM7     |
| NPD_Sets | ASD-denovo-nonsyn | 9378   | NRXN1    |
| NPD_Sets | ASD-denovo-nonsyn | 50618  | ITSN2    |
| NPD_Sets | ASD-denovo-nonsyn | 9166   | EBAG9    |
| NPD_Sets | ASD-denovo-nonsyn | 4929   | NR4A2    |
| NPD_Sets | ASD-denovo-nonsyn | 94137  | RP1L1    |

|          |                   |        |          |
|----------|-------------------|--------|----------|
| NPD_Sets | ASD-denovo-nonsyn | 51555  | PEX5L    |
| NPD_Sets | ASD-denovo-nonsyn | 84919  | PPP1R15B |
| NPD_Sets | ASD-denovo-nonsyn | 89941  | RHOT2    |
| NPD_Sets | ASD-denovo-nonsyn | 54870  | QRICH1   |
| NPD_Sets | ASD-denovo-nonsyn | 5079   | PAX5     |
| NPD_Sets | ASD-denovo-nonsyn | 55283  | MCOLN3   |
| NPD_Sets | ASD-denovo-nonsyn | 26267  | FBXO10   |
| NPD_Sets | ASD-denovo-nonsyn | 57715  | SEMA4G   |
| NPD_Sets | ASD-denovo-nonsyn | 57125  | PLXDC1   |
| NPD_Sets | ASD-denovo-nonsyn | 23506  | GLTSCR1L |
| NPD_Sets | ASD-denovo-nonsyn | 1154   | CISH     |
| NPD_Sets | ASD-denovo-nonsyn | 23167  | EFR3A    |
| NPD_Sets | ASD-denovo-nonsyn | 83992  | CTTNBP2  |
| NPD_Sets | ASD-denovo-nonsyn | 9221   | NOLC1    |
| NPD_Sets | ASD-denovo-nonsyn | 84953  | MICALCL  |
| NPD_Sets | ASD-denovo-nonsyn | 84893  | FBXO18   |
| NPD_Sets | ASD-denovo-nonsyn | 144501 | KRT80    |
| NPD_Sets | ASD-denovo-nonsyn | 1842   | ECM2     |
| NPD_Sets | ASD-denovo-nonsyn | 8029   | CUBN     |
| NPD_Sets | ASD-denovo-nonsyn | 10152  | ABI2     |
| NPD_Sets | ASD-denovo-nonsyn | 4134   | MAP4     |
| NPD_Sets | ASD-denovo-nonsyn | 64848  | YTHDC2   |
| NPD_Sets | ASD-denovo-nonsyn | 57589  | KIAA1432 |
| NPD_Sets | ASD-denovo-nonsyn | 64135  | IFIH1    |
| NPD_Sets | ASD-denovo-nonsyn | 53833  | IL20RB   |
| NPD_Sets | ASD-denovo-nonsyn | 6683   | SPAST    |
| NPD_Sets | ASD-denovo-nonsyn | 22854  | NTNG1    |
| NPD_Sets | ASD-denovo-nonsyn | 56136  | PCDHA13  |
| NPD_Sets | FMRP-Ascano       | 2043   | EPHA4    |
| NPD_Sets | FMRP-Ascano       | 5108   | PCM1     |
| NPD_Sets | FMRP-Ascano       | 57491  | AHRR     |
| NPD_Sets | FMRP-Ascano       | 55717  | WDR11    |
| NPD_Sets | FMRP-Ascano       | 1954   | MEGF8    |
| NPD_Sets | FMRP-Ascano       | 9517   | SPTLC2   |
| NPD_Sets | FMRP-Ascano       | 148156 | ZNF558   |
| NPD_Sets | FMRP-Ascano       | 3607   | FOXK2    |
| NPD_Sets | FMRP-Ascano       | 25902  | MTHFD1L  |
| NPD_Sets | FMRP-Ascano       | 115426 | UHRF2    |
| NPD_Sets | FMRP-Ascano       | 55253  | TYW1     |
| NPD_Sets | FMRP-Ascano       | 10808  | HSPH1    |
| NPD_Sets | FMRP-Ascano       | 3092   | HIP1     |
| NPD_Sets | FMRP-Ascano       | 53349  | ZFYVE1   |
| NPD_Sets | FMRP-Ascano       | 27112  | FAM155B  |
| NPD_Sets | FMRP-Ascano       | 56919  | DHX33    |
| NPD_Sets | FMRP-Ascano       | 9344   | TAOK2    |
| NPD_Sets | FMRP-Ascano       | 10296  | MAEA     |
| NPD_Sets | FMRP-Ascano       | 1000   | CDH2     |
| NPD_Sets | FMRP-Ascano       | 9361   | LONP1    |
| NPD_Sets | FMRP-Ascano       | 51520  | LARS     |
| NPD_Sets | FMRP-Ascano       | 23637  | RABGAP1  |
| NPD_Sets | FMRP-Ascano       | 4241   | MFI2     |
| NPD_Sets | FMRP-Ascano       | 337876 | CHSY3    |
| NPD_Sets | FMRP-Ascano       | 8266   | UBL4A    |
| NPD_Sets | FMRP-Ascano       | 5213   | PFKM     |
| NPD_Sets | FMRP-Ascano       | 4627   | MYH9     |
| NPD_Sets | FMRP-Ascano       | 2768   | GNA12    |
| NPD_Sets | FMRP-Ascano       | 79811  | SLTM     |
| NPD_Sets | FMRP-Ascano       | 51780  | KDM3B    |

|          |             |        |           |
|----------|-------------|--------|-----------|
| NPD_Sets | FMRP-Ascano | 63934  | ZNF667    |
| NPD_Sets | FMRP-Ascano | 9564   | BCAR1     |
| NPD_Sets | FMRP-Ascano | 9732   | DOCK4     |
| NPD_Sets | FMRP-Ascano | 9394   | HS6ST1    |
| NPD_Sets | FMRP-Ascano | 23359  | FAM189A1  |
| NPD_Sets | FMRP-Ascano | 91746  | YTHDC1    |
| NPD_Sets | FMRP-Ascano | 80821  | DDHD1     |
| NPD_Sets | FMRP-Ascano | 5834   | PYGB      |
| NPD_Sets | FMRP-Ascano | 159195 | USP54     |
| NPD_Sets | FMRP-Ascano | 5927   | KDM5A     |
| NPD_Sets | FMRP-Ascano | 6850   | SYK       |
| NPD_Sets | FMRP-Ascano | 84706  | GPT2      |
| NPD_Sets | FMRP-Ascano | 126375 | ZNF792    |
| NPD_Sets | FMRP-Ascano | 6777   | STAT5B    |
| NPD_Sets | FMRP-Ascano | 22950  | SLC4A1AP  |
| NPD_Sets | FMRP-Ascano | 114928 | GPRASP2   |
| NPD_Sets | FMRP-Ascano | 23303  | KIF13B    |
| NPD_Sets | FMRP-Ascano | 57147  | SCYL3     |
| NPD_Sets | FMRP-Ascano | 3065   | HDAC1     |
| NPD_Sets | FMRP-Ascano | 81545  | FBXO38    |
| NPD_Sets | FMRP-Ascano | 116496 | FAM129A   |
| NPD_Sets | FMRP-Ascano | 85377  | MICALL1   |
| NPD_Sets | FMRP-Ascano | 55778  | ZNF839    |
| NPD_Sets | FMRP-Ascano | 25817  | FAM19A5   |
| NPD_Sets | FMRP-Ascano | 399687 | MYO18A    |
| NPD_Sets | FMRP-Ascano | 79714  | CCDC51    |
| NPD_Sets | FMRP-Ascano | 56980  | PRDM10    |
| NPD_Sets | FMRP-Ascano | 84342  | COG8      |
| NPD_Sets | FMRP-Ascano | 284403 | WDR62     |
| NPD_Sets | FMRP-Ascano | 22995  | CEP152    |
| NPD_Sets | FMRP-Ascano | 387893 | SETD8     |
| NPD_Sets | FMRP-Ascano | 4008   | LMO7      |
| NPD_Sets | FMRP-Ascano | 23233  | EXOC6B    |
| NPD_Sets | FMRP-Ascano | 253461 | ZBTB38    |
| NPD_Sets | FMRP-Ascano | 10844  | TUBGCP2   |
| NPD_Sets | FMRP-Ascano | 3308   | HSPA4     |
| NPD_Sets | FMRP-Ascano | 55275  | VPS53     |
| NPD_Sets | FMRP-Ascano | 51593  | SRRT      |
| NPD_Sets | FMRP-Ascano | 57701  | NCKAP5L   |
| NPD_Sets | FMRP-Ascano | 80223  | RAB11FIP1 |
| NPD_Sets | FMRP-Ascano | 9704   | DHX34     |
| NPD_Sets | FMRP-Ascano | 9989   | PPP4R1    |
| NPD_Sets | FMRP-Ascano | 125950 | RAVER1    |
| NPD_Sets | FMRP-Ascano | 339175 | METTL2A   |
| NPD_Sets | FMRP-Ascano | 57679  | ALS2      |
| NPD_Sets | FMRP-Ascano | 4054   | LTBP3     |
| NPD_Sets | FMRP-Ascano | 91     | ACVR1B    |
| NPD_Sets | FMRP-Ascano | 10155  | TRIM28    |
| NPD_Sets | FMRP-Ascano | 5598   | MAPK7     |
| NPD_Sets | FMRP-Ascano | 2621   | GAS6      |
| NPD_Sets | FMRP-Ascano | 4298   | MLLT1     |
| NPD_Sets | FMRP-Ascano | 51230  | PHF20     |
| NPD_Sets | FMRP-Ascano | 64425  | POLR1E    |
| NPD_Sets | FMRP-Ascano | 23152  | CIC       |
| NPD_Sets | FMRP-Ascano | 2017   | CTTN      |
| NPD_Sets | FMRP-Ascano | 80124  | VCPIP1    |
| NPD_Sets | FMRP-Ascano | 7874   | USP7      |
| NPD_Sets | FMRP-Ascano | 3642   | INSM1     |

|          |             |        |          |
|----------|-------------|--------|----------|
| NPD_Sets | FMRP-Ascano | 10483  | SEC23B   |
| NPD_Sets | FMRP-Ascano | 23426  | GRIP1    |
| NPD_Sets | FMRP-Ascano | 257218 | SHPRH    |
| NPD_Sets | FMRP-Ascano | 30827  | CXXC1    |
| NPD_Sets | FMRP-Ascano | 547    | KIF1A    |
| NPD_Sets | FMRP-Ascano | 57646  | USP28    |
| NPD_Sets | FMRP-Ascano | 83852  | SETDB2   |
| NPD_Sets | FMRP-Ascano | 2176   | FANCC    |
| NPD_Sets | FMRP-Ascano | 57448  | BIRC6    |
| NPD_Sets | FMRP-Ascano | 80179  | MYO19    |
| NPD_Sets | FMRP-Ascano | 3676   | ITGA4    |
| NPD_Sets | FMRP-Ascano | 11319  | ECD      |
| NPD_Sets | FMRP-Ascano | 7443   | VRK1     |
| NPD_Sets | FMRP-Ascano | 8438   | RAD54L   |
| NPD_Sets | FMRP-Ascano | 10564  | ARFGEF2  |
| NPD_Sets | FMRP-Ascano | 64151  | NCAPG    |
| NPD_Sets | FMRP-Ascano | 9646   | CTR9     |
| NPD_Sets | FMRP-Ascano | 7267   | TTC3     |
| NPD_Sets | FMRP-Ascano | 9716   | AQR      |
| NPD_Sets | FMRP-Ascano | 84138  | SLC7A6OS |
| NPD_Sets | FMRP-Ascano | 83540  | NUF2     |
| NPD_Sets | FMRP-Ascano | 7156   | TOP3A    |
| NPD_Sets | FMRP-Ascano | 54806  | AHI1     |
| NPD_Sets | FMRP-Ascano | 9448   | MAP4K4   |
| NPD_Sets | FMRP-Ascano | 1981   | EIF4G1   |
| NPD_Sets | FMRP-Ascano | 10999  | SLC27A4  |
| NPD_Sets | FMRP-Ascano | 56254  | RNF20    |
| NPD_Sets | FMRP-Ascano | 11169  | WDHD1    |
| NPD_Sets | FMRP-Ascano | 9314   | KLF4     |
| NPD_Sets | FMRP-Ascano | 4301   | MLLT4    |
| NPD_Sets | FMRP-Ascano | 23670  | TMEM2    |
| NPD_Sets | FMRP-Ascano | 6909   | TBX2     |
| NPD_Sets | FMRP-Ascano | 56926  | NCLN     |
| NPD_Sets | FMRP-Ascano | 4591   | TRIM37   |
| NPD_Sets | FMRP-Ascano | 10994  | ILVBL    |
| NPD_Sets | FMRP-Ascano | 161582 | DYX1C1   |
| NPD_Sets | FMRP-Ascano | 60625  | DHX35    |
| NPD_Sets | FMRP-Ascano | 5116   | PCNT     |
| NPD_Sets | FMRP-Ascano | 57508  | INTS2    |
| NPD_Sets | FMRP-Ascano | 641    | BLM      |
| NPD_Sets | FMRP-Ascano | 57616  | TSHZ3    |
| NPD_Sets | FMRP-Ascano | 80230  | RUFY1    |
| NPD_Sets | FMRP-Ascano | 5894   | RAF1     |
| NPD_Sets | FMRP-Ascano | 80331  | DNAJC5   |
| NPD_Sets | FMRP-Ascano | 23240  | KIAA0922 |
| NPD_Sets | FMRP-Ascano | 10970  | CKAP4    |
| NPD_Sets | FMRP-Ascano | 84034  | EMILIN2  |
| NPD_Sets | FMRP-Ascano | 103    | ADAR     |
| NPD_Sets | FMRP-Ascano | 7596   | ZNF45    |
| NPD_Sets | FMRP-Ascano | 2177   | FANCD2   |
| NPD_Sets | FMRP-Ascano | 53     | ACP2     |
| NPD_Sets | FMRP-Ascano | 3980   | LIG3     |
| NPD_Sets | FMRP-Ascano | 5705   | PSMC5    |
| NPD_Sets | FMRP-Ascano | 8622   | PDE8B    |
| NPD_Sets | FMRP-Ascano | 374654 | KIF7     |
| NPD_Sets | FMRP-Ascano | 57685  | CACHD1   |
| NPD_Sets | FMRP-Ascano | 58506  | SCAF1    |
| NPD_Sets | FMRP-Ascano | 374655 | ZNF710   |

|          |             |        |          |
|----------|-------------|--------|----------|
| NPD_Sets | FMRP-Ascano | 4756   | NEO1     |
| NPD_Sets | FMRP-Ascano | 4810   | NHS      |
| NPD_Sets | FMRP-Ascano | 158158 | RASEF    |
| NPD_Sets | FMRP-Ascano | 116987 | AGAP1    |
| NPD_Sets | FMRP-Ascano | 3313   | HSPA9    |
| NPD_Sets | FMRP-Ascano | 54862  | CC2D1A   |
| NPD_Sets | FMRP-Ascano | 5660   | PSAP     |
| NPD_Sets | FMRP-Ascano | 6448   | SGSH     |
| NPD_Sets | FMRP-Ascano | 55893  | ZNF395   |
| NPD_Sets | FMRP-Ascano | 9625   | AATK     |
| NPD_Sets | FMRP-Ascano | 23211  | ZC3H4    |
| NPD_Sets | FMRP-Ascano | 9759   | HDAC4    |
| NPD_Sets | FMRP-Ascano | 4926   | NUMA1    |
| NPD_Sets | FMRP-Ascano | 79954  | NOL10    |
| NPD_Sets | FMRP-Ascano | 2774   | GNAL     |
| NPD_Sets | FMRP-Ascano | 23438  | HARS2    |
| NPD_Sets | FMRP-Ascano | 51283  | BFAR     |
| NPD_Sets | FMRP-Ascano | 4605   | MYBL2    |
| NPD_Sets | FMRP-Ascano | 1362   | CPD      |
| NPD_Sets | FMRP-Ascano | 64399  | HHIP     |
| NPD_Sets | FMRP-Ascano | 9128   | PRPF4    |
| NPD_Sets | FMRP-Ascano | 22856  | CHSY1    |
| NPD_Sets | FMRP-Ascano | 3202   | HOXA5    |
| NPD_Sets | FMRP-Ascano | 85450  | ITPRIP   |
| NPD_Sets | FMRP-Ascano | 9092   | SART1    |
| NPD_Sets | FMRP-Ascano | 8664   | EIF3D    |
| NPD_Sets | FMRP-Ascano | 351    | APP      |
| NPD_Sets | FMRP-Ascano | 8527   | DGKD     |
| NPD_Sets | FMRP-Ascano | 5422   | POLA1    |
| NPD_Sets | FMRP-Ascano | 9462   | RASAL2   |
| NPD_Sets | FMRP-Ascano | 3480   | IGF1R    |
| NPD_Sets | FMRP-Ascano | 9640   | ZNF592   |
| NPD_Sets | FMRP-Ascano | 64132  | XYLT2    |
| NPD_Sets | FMRP-Ascano | 23351  | KHNYN    |
| NPD_Sets | FMRP-Ascano | 10781  | ZNF266   |
| NPD_Sets | FMRP-Ascano | 9353   | SLIT2    |
| NPD_Sets | FMRP-Ascano | 9679   | FAM53B   |
| NPD_Sets | FMRP-Ascano | 23659  | PLA2G15  |
| NPD_Sets | FMRP-Ascano | 134957 | STXBP5   |
| NPD_Sets | FMRP-Ascano | 26133  | TRPC4AP  |
| NPD_Sets | FMRP-Ascano | 4686   | NCBP1    |
| NPD_Sets | FMRP-Ascano | 9569   | GTF2IRD1 |
| NPD_Sets | FMRP-Ascano | 23524  | SRRM2    |
| NPD_Sets | FMRP-Ascano | 23179  | RGL1     |
| NPD_Sets | FMRP-Ascano | 1785   | DNM2     |
| NPD_Sets | FMRP-Ascano | 8602   | NOP14    |
| NPD_Sets | FMRP-Ascano | 256364 | EML3     |
| NPD_Sets | FMRP-Ascano | 79633  | FAT4     |
| NPD_Sets | FMRP-Ascano | 51088  | KLHL5    |
| NPD_Sets | FMRP-Ascano | 23258  | DENND5A  |
| NPD_Sets | FMRP-Ascano | 1809   | DPYSL3   |
| NPD_Sets | FMRP-Ascano | 7049   | TGFBR3   |
| NPD_Sets | FMRP-Ascano | 27044  | SND1     |
| NPD_Sets | FMRP-Ascano | 58499  | ZNF462   |
| NPD_Sets | FMRP-Ascano | 5236   | PGM1     |
| NPD_Sets | FMRP-Ascano | 125058 | TBC1D16  |
| NPD_Sets | FMRP-Ascano | 79414  | LRFN3    |
| NPD_Sets | FMRP-Ascano | 10111  | RAD50    |

|          |             |        |                 |
|----------|-------------|--------|-----------------|
| NPD_Sets | FMRP-Ascano | 4245   | MGAT1           |
| NPD_Sets | FMRP-Ascano | 650    | BMP2            |
| NPD_Sets | FMRP-Ascano | 55760  | DHX32           |
| NPD_Sets | FMRP-Ascano | 57479  | PRR12           |
| NPD_Sets | FMRP-Ascano | 23301  | EHBP1           |
| NPD_Sets | FMRP-Ascano | 29781  | NCAPH2          |
| NPD_Sets | FMRP-Ascano | 197131 | UBR1            |
| NPD_Sets | FMRP-Ascano | 115950 | ZNF653          |
| NPD_Sets | FMRP-Ascano | 56886  | UGGT1           |
| NPD_Sets | FMRP-Ascano | 56931  | DUS3L           |
| NPD_Sets | FMRP-Ascano | 10144  | FAM13A          |
| NPD_Sets | FMRP-Ascano | 7692   | ZNF133          |
| NPD_Sets | FMRP-Ascano | 5792   | PTPRF           |
| NPD_Sets | FMRP-Ascano | 55568  | GALNT10         |
| NPD_Sets | FMRP-Ascano | 148398 | SAMD11          |
| NPD_Sets | FMRP-Ascano | 55718  | POLR3E          |
| NPD_Sets | FMRP-Ascano | 23042  | PDXDC1          |
| NPD_Sets | FMRP-Ascano | 23139  | MAST2           |
| NPD_Sets | FMRP-Ascano | 51366  | UBR5            |
| NPD_Sets | FMRP-Ascano | 79754  | ASB13           |
| NPD_Sets | FMRP-Ascano | 51202  | DDX47           |
| NPD_Sets | FMRP-Ascano | 7128   | TNFAIP3         |
| NPD_Sets | FMRP-Ascano | 8792   | TNFRSF11A       |
| NPD_Sets | FMRP-Ascano | 4851   | NOTCH1          |
| NPD_Sets | FMRP-Ascano | 23132  | RAD54L2         |
| NPD_Sets | FMRP-Ascano | 9882   | TBC1D4          |
| NPD_Sets | FMRP-Ascano | 6624   | FSCN1           |
| NPD_Sets | FMRP-Ascano | 4215   | MAP3K3          |
| NPD_Sets | FMRP-Ascano | 1039   | CDR2            |
| NPD_Sets | FMRP-Ascano | 2064   | ERBB2           |
| NPD_Sets | FMRP-Ascano | 2534   | FYN             |
| NPD_Sets | FMRP-Ascano | 63893  | UBE2O           |
| NPD_Sets | FMRP-Ascano | 79147  | FKRP            |
| NPD_Sets | FMRP-Ascano | 6305   | SBF1            |
| NPD_Sets | FMRP-Ascano | 6749   | SSRP1           |
| NPD_Sets | FMRP-Ascano | 23338  | PHF15           |
| NPD_Sets | FMRP-Ascano | 9785   | DHX38           |
| NPD_Sets | FMRP-Ascano | 54476  | RNF216          |
| NPD_Sets | FMRP-Ascano | 9927   | MFN2            |
| NPD_Sets | FMRP-Ascano | 8467   | SMARCA5         |
| NPD_Sets | FMRP-Ascano | 476    | ATP1A1          |
| NPD_Sets | FMRP-Ascano | 211    | ALAS1           |
| NPD_Sets | FMRP-Ascano | 55677  | IWS1            |
| NPD_Sets | FMRP-Ascano | 26005  | C2CD3           |
| NPD_Sets | FMRP-Ascano | 2720   | GLB1            |
| NPD_Sets | FMRP-Ascano | 7375   | USP4            |
| NPD_Sets | FMRP-Ascano | 23646  | PLD3            |
| NPD_Sets | FMRP-Ascano | 404734 | ANKHD1-EIF4EBP3 |
| NPD_Sets | FMRP-Ascano | 5738   | PTGFRN          |
| NPD_Sets | FMRP-Ascano | 8567   | MADD            |
| NPD_Sets | FMRP-Ascano | 54887  | UHRF1BP1        |
| NPD_Sets | FMRP-Ascano | 64852  | TUT1            |
| NPD_Sets | FMRP-Ascano | 4691   | NCL             |
| NPD_Sets | FMRP-Ascano | 84134  | TOMM40L         |
| NPD_Sets | FMRP-Ascano | 79659  | DYNC2H1         |
| NPD_Sets | FMRP-Ascano | 8573   | CASK            |
| NPD_Sets | FMRP-Ascano | 64780  | MICAL1          |
| NPD_Sets | FMRP-Ascano | 10194  | TSHZ1           |



|          |             |        |          |
|----------|-------------|--------|----------|
| NPD_Sets | FMRP-Ascano | 23028  | KDM1A    |
| NPD_Sets | FMRP-Ascano | 150737 | TTC30B   |
| NPD_Sets | FMRP-Ascano | 472    | ATM      |
| NPD_Sets | FMRP-Ascano | 22937  | SCAP     |
| NPD_Sets | FMRP-Ascano | 79605  | PGBD5    |
| NPD_Sets | FMRP-Ascano | 51427  | ZNF107   |
| NPD_Sets | FMRP-Ascano | 5774   | PTPN3    |
| NPD_Sets | FMRP-Ascano | 79893  | GGNBP2   |
| NPD_Sets | FMRP-Ascano | 65095  | KRI1     |
| NPD_Sets | FMRP-Ascano | 123169 | LEO1     |
| NPD_Sets | FMRP-Ascano | 8516   | ITGA8    |
| NPD_Sets | FMRP-Ascano | 2673   | GFPT1    |
| NPD_Sets | FMRP-Ascano | 9601   | PDIA4    |
| NPD_Sets | FMRP-Ascano | 2033   | EP300    |
| NPD_Sets | FMRP-Ascano | 3035   | HARS     |
| NPD_Sets | FMRP-Ascano | 3550   | IK       |
| NPD_Sets | FMRP-Ascano | 7090   | TLE3     |
| NPD_Sets | FMRP-Ascano | 8425   | LTBP4    |
| NPD_Sets | FMRP-Ascano | 9423   | NTN1     |
| NPD_Sets | FMRP-Ascano | 24137  | KIF4A    |
| NPD_Sets | FMRP-Ascano | 2590   | GALNT2   |
| NPD_Sets | FMRP-Ascano | 399909 | PCNXL3   |
| NPD_Sets | FMRP-Ascano | 440193 | CCDC88C  |
| NPD_Sets | FMRP-Ascano | 4522   | MTHFD1   |
| NPD_Sets | FMRP-Ascano | 26015  | RPAP1    |
| NPD_Sets | FMRP-Ascano | 9382   | COG1     |
| NPD_Sets | FMRP-Ascano | 993    | CDC25A   |
| NPD_Sets | FMRP-Ascano | 9442   | MED27    |
| NPD_Sets | FMRP-Ascano | 8940   | TOP3B    |
| NPD_Sets | FMRP-Ascano | 54549  | SDK2     |
| NPD_Sets | FMRP-Ascano | 6597   | SMARCA4  |
| NPD_Sets | FMRP-Ascano | 7407   | VAR5     |
| NPD_Sets | FMRP-Ascano | 53616  | ADAM22   |
| NPD_Sets | FMRP-Ascano | 8828   | NRP2     |
| NPD_Sets | FMRP-Ascano | 2186   | BPTF     |
| NPD_Sets | FMRP-Ascano | 146923 | RUNDC1   |
| NPD_Sets | FMRP-Ascano | 4548   | MTR      |
| NPD_Sets | FMRP-Ascano | 55178  | RNMTL1   |
| NPD_Sets | FMRP-Ascano | 23499  | MACF1    |
| NPD_Sets | FMRP-Ascano | 9826   | ARHGEF11 |
| NPD_Sets | FMRP-Ascano | 4131   | MAP1B    |
| NPD_Sets | FMRP-Ascano | 9469   | CHST3    |
| NPD_Sets | FMRP-Ascano | 5603   | MAPK13   |
| NPD_Sets | FMRP-Ascano | 22884  | WDR37    |
| NPD_Sets | FMRP-Ascano | 5361   | PLXNA1   |
| NPD_Sets | FMRP-Ascano | 8661   | EIF3A    |
| NPD_Sets | FMRP-Ascano | 23235  | SIK2     |
| NPD_Sets | FMRP-Ascano | 9771   | RAPGEF5  |
| NPD_Sets | FMRP-Ascano | 10153  | CEBPZ    |
| NPD_Sets | FMRP-Ascano | 11124  | FAF1     |
| NPD_Sets | FMRP-Ascano | 11120  | BTN2A1   |
| NPD_Sets | FMRP-Ascano | 118    | ADD1     |
| NPD_Sets | FMRP-Ascano | 57521  | RPTOR    |
| NPD_Sets | FMRP-Ascano | 64794  | DDX31    |
| NPD_Sets | FMRP-Ascano | 23432  | GPR161   |
| NPD_Sets | FMRP-Ascano | 3667   | IRS1     |
| NPD_Sets | FMRP-Ascano | 163    | AP2B1    |
| NPD_Sets | FMRP-Ascano | 9644   | SH3PXD2A |

|          |             |        |          |
|----------|-------------|--------|----------|
| NPD_Sets | FMRP-Ascano | 6872   | TAF1     |
| NPD_Sets | FMRP-Ascano | 23216  | TBC1D1   |
| NPD_Sets | FMRP-Ascano | 24145  | PANX1    |
| NPD_Sets | FMRP-Ascano | 10574  | CCT7     |
| NPD_Sets | FMRP-Ascano | 5318   | PKP2     |
| NPD_Sets | FMRP-Ascano | 27245  | AHDC1    |
| NPD_Sets | FMRP-Ascano | 8777   | MPDZ     |
| NPD_Sets | FMRP-Ascano | 6091   | ROBO1    |
| NPD_Sets | FMRP-Ascano | 26153  | KIF26A   |
| NPD_Sets | FMRP-Ascano | 5588   | PRKCQ    |
| NPD_Sets | FMRP-Ascano | 11044  | PAPD7    |
| NPD_Sets | FMRP-Ascano | 8535   | CBX4     |
| NPD_Sets | FMRP-Ascano | 2009   | EML1     |
| NPD_Sets | FMRP-Ascano | 10131  | TRAP1    |
| NPD_Sets | FMRP-Ascano | 25     | ABL1     |
| NPD_Sets | FMRP-Ascano | 85440  | DOCK7    |
| NPD_Sets | FMRP-Ascano | 55610  | CCDC132  |
| NPD_Sets | FMRP-Ascano | 10072  | DPP3     |
| NPD_Sets | FMRP-Ascano | 2058   | EPRS     |
| NPD_Sets | FMRP-Ascano | 26267  | FBXO10   |
| NPD_Sets | FMRP-Ascano | 114789 | SLC25A25 |
| NPD_Sets | FMRP-Ascano | 23207  | PLEKHM2  |
| NPD_Sets | FMRP-Ascano | 10765  | KDM5B    |
| NPD_Sets | FMRP-Ascano | 6839   | SUV39H1  |
| NPD_Sets | FMRP-Ascano | 117246 | FTSJ3    |
| NPD_Sets | FMRP-Ascano | 5830   | PEX5     |
| NPD_Sets | FMRP-Ascano | 5428   | POLG     |
| NPD_Sets | FMRP-Ascano | 9110   | MTMR4    |
| NPD_Sets | FMRP-Ascano | 22980  | TCF25    |
| NPD_Sets | FMRP-Ascano | 57522  | SRGAP1   |
| NPD_Sets | FMRP-Ascano | 84629  | TNRC18   |
| NPD_Sets | FMRP-Ascano | 55125  | CEP192   |
| NPD_Sets | FMRP-Ascano | 5310   | PKD1     |
| NPD_Sets | FMRP-Ascano | 10181  | RBM5     |
| NPD_Sets | FMRP-Ascano | 9328   | GTF3C5   |
| NPD_Sets | FMRP-Ascano | 9183   | ZW10     |
| NPD_Sets | FMRP-Ascano | 23108  | RAP1GAP2 |
| NPD_Sets | FMRP-Ascano | 29123  | ANKRD11  |
| NPD_Sets | FMRP-Ascano | 55898  | UNC45A   |
| NPD_Sets | FMRP-Ascano | 9733   | SART3    |
| NPD_Sets | FMRP-Ascano | 84656  | GLYR1    |
| NPD_Sets | FMRP-Ascano | 79960  | PHF17    |
| NPD_Sets | FMRP-Ascano | 9793   | CKAP5    |
| NPD_Sets | FMRP-Ascano | 9219   | MTA2     |
| NPD_Sets | FMRP-Ascano | 9747   | FAM115A  |
| NPD_Sets | FMRP-Ascano | 4651   | MYO10    |
| NPD_Sets | FMRP-Ascano | 3141   | HLCS     |
| NPD_Sets | FMRP-Ascano | 1612   | DAPK1    |
| NPD_Sets | FMRP-Ascano | 50     | ACO2     |
| NPD_Sets | FMRP-Ascano | 4171   | MCM2     |
| NPD_Sets | FMRP-Ascano | 9510   | ADAMTS1  |
| NPD_Sets | FMRP-Ascano | 23223  | RRP12    |
| NPD_Sets | FMRP-Ascano | 255252 | LRRC57   |
| NPD_Sets | FMRP-Ascano | 8829   | NRP1     |
| NPD_Sets | FMRP-Ascano | 831    | CAST     |
| NPD_Sets | FMRP-Ascano | 7203   | CCT3     |
| NPD_Sets | FMRP-Ascano | 583    | BBS2     |
| NPD_Sets | FMRP-Ascano | 7186   | TRAF2    |

|          |             |        |          |
|----------|-------------|--------|----------|
| NPD_Sets | FMRP-Ascano | 347902 | AMIGO2   |
| NPD_Sets | FMRP-Ascano | 25896  | INTS7    |
| NPD_Sets | FMRP-Ascano | 84167  | C19orf44 |
| NPD_Sets | FMRP-Ascano | 51001  | MTERFD1  |
| NPD_Sets | FMRP-Ascano | 23061  | TBC1D9B  |
| NPD_Sets | FMRP-Ascano | 137964 | AGPAT6   |
| NPD_Sets | FMRP-Ascano | 79677  | SMC6     |
| NPD_Sets | FMRP-Ascano | 4176   | MCM7     |
| NPD_Sets | FMRP-Ascano | 7088   | TLE1     |
| NPD_Sets | FMRP-Ascano | 9862   | MED24    |
| NPD_Sets | FMRP-Ascano | 55722  | CEP72    |
| NPD_Sets | FMRP-Ascano | 80208  | SPG11    |
| NPD_Sets | FMRP-Ascano | 288    | ANK3     |
| NPD_Sets | FMRP-Ascano | 84851  | TRIM52   |
| NPD_Sets | FMRP-Ascano | 25925  | ZNF521   |
| NPD_Sets | FMRP-Ascano | 93323  | HAUS8    |
| NPD_Sets | FMRP-Ascano | 9794   | MAML1    |
| NPD_Sets | FMRP-Ascano | 64411  | ARAP3    |
| NPD_Sets | FMRP-Ascano | 84444  | DOT1L    |
| NPD_Sets | FMRP-Ascano | 116985 | ARAP1    |
| NPD_Sets | FMRP-Ascano | 6786   | STIM1    |
| NPD_Sets | FMRP-Ascano | 23175  | LPIN1    |
| NPD_Sets | FMRP-Ascano | 221061 | FAM171A1 |
| NPD_Sets | FMRP-Ascano | 8427   | ZNF282   |
| NPD_Sets | FMRP-Ascano | 64118  | DUS1L    |
| NPD_Sets | FMRP-Ascano | 5802   | PTPRS    |
| NPD_Sets | FMRP-Ascano | 114826 | SMYD4    |
| NPD_Sets | FMRP-Ascano | 8660   | IRS2     |
| NPD_Sets | FMRP-Ascano | 6301   | SARS     |
| NPD_Sets | FMRP-Ascano | 9258   | MFHAS1   |
| NPD_Sets | FMRP-Ascano | 53615  | MBD3     |
| NPD_Sets | FMRP-Ascano | 56905  | C15orf39 |
| NPD_Sets | FMRP-Ascano | 23361  | ZNF629   |
| NPD_Sets | FMRP-Ascano | 81570  | CLPB     |
| NPD_Sets | FMRP-Ascano | 3673   | ITGA2    |
| NPD_Sets | FMRP-Ascano | 26205  | GMEB2    |
| NPD_Sets | FMRP-Ascano | 6741   | SSB      |
| NPD_Sets | FMRP-Ascano | 140730 | RIMS4    |
| NPD_Sets | FMRP-Ascano | 109    | ADCY3    |
| NPD_Sets | FMRP-Ascano | 2110   | ETFDH    |
| NPD_Sets | FMRP-Ascano | 9678   | PHF14    |
| NPD_Sets | FMRP-Ascano | 6711   | SPTBN1   |
| NPD_Sets | FMRP-Ascano | 26504  | CNNM4    |
| NPD_Sets | FMRP-Ascano | 253650 | ANKRD18A |
| NPD_Sets | FMRP-Ascano | 5903   | RANBP2   |
| NPD_Sets | FMRP-Ascano | 23     | ABCF1    |
| NPD_Sets | FMRP-Ascano | 84162  | KIAA1109 |
| NPD_Sets | FMRP-Ascano | 54480  | CHPF2    |
| NPD_Sets | FMRP-Ascano | 1523   | CUX1     |
| NPD_Sets | FMRP-Ascano | 57704  | GBA2     |
| NPD_Sets | FMRP-Ascano | 23339  | VPS39    |
| NPD_Sets | FMRP-Ascano | 2137   | EXTL3    |
| NPD_Sets | FMRP-Ascano | 25799  | ZNF324   |
| NPD_Sets | FMRP-Ascano | 4077   | NBR1     |
| NPD_Sets | FMRP-Ascano | 23332  | CLASP1   |
| NPD_Sets | FMRP-Ascano | 51602  | NOP58    |
| NPD_Sets | FMRP-Ascano | 9215   | LARGE    |
| NPD_Sets | FMRP-Ascano | 340252 | ZNF680   |

|          |             |        |          |
|----------|-------------|--------|----------|
| NPD_Sets | FMRP-Ascano | 2733   | GLE1     |
| NPD_Sets | FMRP-Ascano | 89781  | HPS4     |
| NPD_Sets | FMRP-Ascano | 55187  | VPS13D   |
| NPD_Sets | FMRP-Ascano | 23386  | NUDCD3   |
| NPD_Sets | FMRP-Ascano | 150465 | TTL      |
| NPD_Sets | FMRP-Ascano | 644815 | FAM83G   |
| NPD_Sets | FMRP-Ascano | 9980   | DOPEY2   |
| NPD_Sets | FMRP-Ascano | 4175   | MCM6     |
| NPD_Sets | FMRP-Ascano | 9397   | NMT2     |
| NPD_Sets | FMRP-Ascano | 51429  | SNX9     |
| NPD_Sets | FMRP-Ascano | 6840   | SVIL     |
| NPD_Sets | FMRP-Ascano | 55813  | UTP6     |
| NPD_Sets | FMRP-Ascano | 8720   | MBTPS1   |
| NPD_Sets | FMRP-Ascano | 9817   | KEAP1    |
| NPD_Sets | FMRP-Ascano | 79803  | HPS6     |
| NPD_Sets | FMRP-Ascano | 107    | ADCY1    |
| NPD_Sets | FMRP-Ascano | 4898   | NRD1     |
| NPD_Sets | FMRP-Ascano | 22993  | HMGXB3   |
| NPD_Sets | FMRP-Ascano | 136051 | ZNF786   |
| NPD_Sets | FMRP-Ascano | 57634  | EP400    |
| NPD_Sets | FMRP-Ascano | 22920  | KIFAP3   |
| NPD_Sets | FMRP-Ascano | 55215  | FANCI    |
| NPD_Sets | FMRP-Ascano | 1314   | COPA     |
| NPD_Sets | FMRP-Ascano | 11336  | EXOC3    |
| NPD_Sets | FMRP-Ascano | 8874   | ARHGEF7  |
| NPD_Sets | FMRP-Ascano | 3978   | LIG1     |
| NPD_Sets | FMRP-Ascano | 613    | BCR      |
| NPD_Sets | FMRP-Ascano | 54620  | FBXL19   |
| NPD_Sets | FMRP-Ascano | 23451  | SF3B1    |
| NPD_Sets | FMRP-Ascano | 5797   | PTPRM    |
| NPD_Sets | FMRP-Ascano | 1455   | CSNK1G2  |
| NPD_Sets | FMRP-Ascano | 7753   | ZNF202   |
| NPD_Sets | FMRP-Ascano | 8826   | IQGAP1   |
| NPD_Sets | FMRP-Ascano | 54487  | DGCR8    |
| NPD_Sets | FMRP-Ascano | 85379  | KIAA1671 |
| NPD_Sets | FMRP-Ascano | 987    | LRBA     |
| NPD_Sets | FMRP-Ascano | 120114 | FAT3     |
| NPD_Sets | FMRP-Ascano | 9820   | CUL7     |
| NPD_Sets | FMRP-Ascano | 285527 | FRYL     |
| NPD_Sets | FMRP-Ascano | 9578   | CDC42BPB |
| NPD_Sets | FMRP-Ascano | 9181   | ARHGEF2  |
| NPD_Sets | FMRP-Ascano | 166647 | GPR125   |
| NPD_Sets | FMRP-Ascano | 121551 | BTBD11   |
| NPD_Sets | FMRP-Ascano | 1477   | CSTF1    |
| NPD_Sets | FMRP-Ascano | 23224  | SYNE2    |
| NPD_Sets | FMRP-Ascano | 4216   | MAP3K4   |
| NPD_Sets | FMRP-Ascano | 23180  | RFTN1    |
| NPD_Sets | FMRP-Ascano | 4836   | NMT1     |
| NPD_Sets | FMRP-Ascano | 5351   | PLOD1    |
| NPD_Sets | FMRP-Ascano | 3609   | ILF3     |
| NPD_Sets | FMRP-Ascano | 7074   | TIAM1    |
| NPD_Sets | FMRP-Ascano | 2314   | FLII     |
| NPD_Sets | FMRP-Ascano | 79868  | ALG13    |
| NPD_Sets | FMRP-Ascano | 2887   | GRB10    |
| NPD_Sets | FMRP-Ascano | 113146 | AHNAK2   |
| NPD_Sets | FMRP-Ascano | 10403  | NDC80    |
| NPD_Sets | FMRP-Ascano | 5253   | PHF2     |
| NPD_Sets | FMRP-Ascano | 7586   | ZKSCAN1  |

|          |             |        |          |
|----------|-------------|--------|----------|
| NPD_Sets | FMRP-Ascano | 55153  | SDAD1    |
| NPD_Sets | FMRP-Ascano | 26960  | NBEA     |
| NPD_Sets | FMRP-Ascano | 5099   | PCDH7    |
| NPD_Sets | FMRP-Ascano | 7436   | VLDLR    |
| NPD_Sets | FMRP-Ascano | 54625  | PARP14   |
| NPD_Sets | FMRP-Ascano | 23228  | PLCL2    |
| NPD_Sets | FMRP-Ascano | 22982  | DIP2C    |
| NPD_Sets | FMRP-Ascano | 24147  | FJX1     |
| NPD_Sets | FMRP-Ascano | 63916  | ELMO2    |
| NPD_Sets | FMRP-Ascano | 57703  | CWC22    |
| NPD_Sets | FMRP-Ascano | 1850   | DUSP8    |
| NPD_Sets | FMRP-Ascano | 10868  | USP20    |
| NPD_Sets | FMRP-Ascano | 9922   | IQSEC1   |
| NPD_Sets | FMRP-Ascano | 26019  | UPF2     |
| NPD_Sets | FMRP-Ascano | 90075  | ZNF30    |
| NPD_Sets | FMRP-Ascano | 23294  | ANKS1A   |
| NPD_Sets | FMRP-Ascano | 302    | ANXA2    |
| NPD_Sets | FMRP-Ascano | 6238   | RRBP1    |
| NPD_Sets | FMRP-Ascano | 10112  | KIF20A   |
| NPD_Sets | FMRP-Ascano | 3326   | HSP90AB1 |
| NPD_Sets | FMRP-Ascano | 55552  | ZNF823   |
| NPD_Sets | FMRP-Ascano | 87     | ACTN1    |
| NPD_Sets | FMRP-Ascano | 27152  | INTU     |
| NPD_Sets | FMRP-Ascano | 10073  | SNUPN    |
| NPD_Sets | FMRP-Ascano | 1952   | CELSR2   |
| NPD_Sets | FMRP-Ascano | 79631  | EFTUD1   |
| NPD_Sets | FMRP-Ascano | 29888  | STRN4    |
| NPD_Sets | FMRP-Ascano | 160518 | DENND5B  |
| NPD_Sets | FMRP-Ascano | 84132  | USP42    |
| NPD_Sets | FMRP-Ascano | 1642   | DDB1     |
| NPD_Sets | FMRP-Ascano | 955    | ENTPD6   |
| NPD_Sets | FMRP-Ascano | 55628  | ZNF407   |
| NPD_Sets | FMRP-Ascano | 5514   | PPP1R10  |
| NPD_Sets | FMRP-Ascano | 9632   | SEC24C   |
| NPD_Sets | FMRP-Ascano | 182    | JAG1     |
| NPD_Sets | FMRP-Ascano | 55746  | NUP133   |
| NPD_Sets | FMRP-Ascano | 2132   | EXT2     |
| NPD_Sets | FMRP-Ascano | 7737   | RNF113A  |
| NPD_Sets | FMRP-Ascano | 90627  | STARD13  |
| NPD_Sets | FMRP-Ascano | 9321   | TRIP11   |
| NPD_Sets | FMRP-Ascano | 160851 | DGKH     |
| NPD_Sets | FMRP-Ascano | 23355  | VPS8     |
| NPD_Sets | FMRP-Ascano | 23210  | JMJD6    |
| NPD_Sets | FMRP-Ascano | 27340  | UTP20    |
| NPD_Sets | FMRP-Ascano | 9891   | NUAK1    |
| NPD_Sets | FMRP-Ascano | 59277  | NTN4     |
| NPD_Sets | FMRP-Ascano | 57118  | CAMK1D   |
| NPD_Sets | FMRP-Ascano | 3837   | KPNB1    |
| NPD_Sets | FMRP-Ascano | 84893  | FBXO18   |
| NPD_Sets | FMRP-Ascano | 9670   | IPO13    |
| NPD_Sets | FMRP-Ascano | 84895  | FAM73B   |
| NPD_Sets | FMRP-Ascano | 7750   | ZMYM2    |
| NPD_Sets | FMRP-Ascano | 667    | DST      |
| NPD_Sets | FMRP-Ascano | 23203  | PMPCA    |
| NPD_Sets | FMRP-Ascano | 545    | ATR      |
| NPD_Sets | FMRP-Ascano | 9146   | HGS      |
| NPD_Sets | FMRP-Ascano | 80206  | FHOD3    |
| NPD_Sets | FMRP-Ascano | 140809 | SRXN1    |

|          |             |        |          |
|----------|-------------|--------|----------|
| NPD_Sets | FMRP-Ascano | 7511   | XPNPEP1  |
| NPD_Sets | FMRP-Ascano | 5859   | QARS     |
| NPD_Sets | FMRP-Ascano | 57647  | DHX37    |
| NPD_Sets | FMRP-Ascano | 5255   | PHKA1    |
| NPD_Sets | FMRP-Ascano | 23309  | SIN3B    |
| NPD_Sets | FMRP-Ascano | 8927   | BSN      |
| NPD_Sets | FMRP-Ascano | 4676   | NAP1L4   |
| NPD_Sets | FMRP-Ascano | 23534  | TNPO3    |
| NPD_Sets | FMRP-Ascano | 10514  | MYBBP1A  |
| NPD_Sets | FMRP-Ascano | 976    | CD97     |
| NPD_Sets | FMRP-Ascano | 9920   | KBTBD11  |
| NPD_Sets | FMRP-Ascano | 833    | CARS     |
| NPD_Sets | FMRP-Ascano | 10869  | USP19    |
| NPD_Sets | FMRP-Ascano | 55636  | CHD7     |
| NPD_Sets | FMRP-Ascano | 3069   | HDLBP    |
| NPD_Sets | FMRP-Ascano | 4790   | NFKB1    |
| NPD_Sets | FMRP-Ascano | 9330   | GTF3C3   |
| NPD_Sets | FMRP-Ascano | 57062  | DDX24    |
| NPD_Sets | FMRP-Ascano | 30811  | HUNK     |
| NPD_Sets | FMRP-Ascano | 4041   | LRP5     |
| NPD_Sets | FMRP-Ascano | 57505  | AARS2    |
| NPD_Sets | FMRP-Ascano | 9968   | MED12    |
| NPD_Sets | FMRP-Ascano | 23344  | ESYT1    |
| NPD_Sets | FMRP-Ascano | 23654  | PLXNB2   |
| NPD_Sets | FMRP-Ascano | 58504  | ARHGAP22 |
| NPD_Sets | FMRP-Ascano | 23251  | KIAA1024 |
| NPD_Sets | FMRP-Ascano | 54856  | GON4L    |
| NPD_Sets | FMRP-Ascano | 81559  | TRIM11   |
| NPD_Sets | FMRP-Ascano | 54496  | PRMT7    |
| NPD_Sets | FMRP-Ascano | 147923 | ZNF420   |
| NPD_Sets | FMRP-Ascano | 162    | AP1B1    |
| NPD_Sets | FMRP-Ascano | 7840   | ALMS1    |
| NPD_Sets | FMRP-Ascano | 23269  | MGA      |
| NPD_Sets | FMRP-Ascano | 3949   | LDLR     |
| NPD_Sets | FMRP-Ascano | 1616   | DAXX     |
| NPD_Sets | FMRP-Ascano | 10127  | ZNF263   |
| NPD_Sets | FMRP-Ascano | 23066  | CAND2    |
| NPD_Sets | FMRP-Ascano | 57410  | SCYL1    |
| NPD_Sets | FMRP-Ascano | 3833   | KIFC1    |
| NPD_Sets | FMRP-Ascano | 9730   | VPRBP    |
| NPD_Sets | FMRP-Ascano | 7175   | TPR      |
| NPD_Sets | FMRP-Ascano | 8943   | AP3D1    |
| NPD_Sets | FMRP-Ascano | 23510  | KCTD2    |
| NPD_Sets | FMRP-Ascano | 80005  | DOCK5    |
| NPD_Sets | FMRP-Ascano | 10592  | SMC2     |
| NPD_Sets | FMRP-Ascano | 22883  | CLSTN1   |
| NPD_Sets | FMRP-Ascano | 344558 | SH3RF3   |
| NPD_Sets | FMRP-Ascano | 2580   | GAK      |
| NPD_Sets | FMRP-Ascano | 4172   | MCM3     |
| NPD_Sets | FMRP-Ascano | 10940  | POP1     |
| NPD_Sets | FMRP-Ascano | 126070 | ZNF440   |
| NPD_Sets | FMRP-Ascano | 55770  | EXOC2    |
| NPD_Sets | FMRP-Ascano | 4285   | MIPEP    |
| NPD_Sets | FMRP-Ascano | 1793   | DOCK1    |
| NPD_Sets | FMRP-Ascano | 9895   | TECPR2   |
| NPD_Sets | FMRP-Ascano | 89796  | NAV1     |
| NPD_Sets | FMRP-Ascano | 321    | APBA2    |
| NPD_Sets | FMRP-Ascano | 4641   | MYO1C    |

|          |             |        |           |
|----------|-------------|--------|-----------|
| NPD_Sets | FMRP-Ascano | 7222   | TRPC3     |
| NPD_Sets | FMRP-Ascano | 375449 | MAST4     |
| NPD_Sets | FMRP-Ascano | 80347  | COASY     |
| NPD_Sets | FMRP-Ascano | 10579  | TACC2     |
| NPD_Sets | FMRP-Ascano | 55388  | MCM10     |
| NPD_Sets | FMRP-Ascano | 56897  | WRNIP1    |
| NPD_Sets | FMRP-Ascano | 51761  | ATP8A2    |
| NPD_Sets | FMRP-Ascano | 7158   | TP53BP1   |
| NPD_Sets | FMRP-Ascano | 3099   | HK2       |
| NPD_Sets | FMRP-Ascano | 3915   | LAMC1     |
| NPD_Sets | FMRP-Ascano | 25879  | DCAF13    |
| NPD_Sets | FMRP-Ascano | 2261   | FGFR3     |
| NPD_Sets | FMRP-Ascano | 91151  | TIGD7     |
| NPD_Sets | FMRP-Ascano | 5209   | PFKFB3    |
| NPD_Sets | FMRP-Ascano | 9905   | SGSM2     |
| NPD_Sets | FMRP-Ascano | 23481  | PES1      |
| NPD_Sets | FMRP-Ascano | 8458   | TTF2      |
| NPD_Sets | FMRP-Ascano | 155435 | RBM33     |
| NPD_Sets | FMRP-Ascano | 3309   | HSPA5     |
| NPD_Sets | FMRP-Ascano | 8189   | SYMPK     |
| NPD_Sets | FMRP-Ascano | 57674  | RNF213    |
| NPD_Sets | FMRP-Ascano | 23236  | PLCB1     |
| NPD_Sets | FMRP-Ascano | 23450  | SF3B3     |
| NPD_Sets | FMRP-Ascano | 79932  | KIAA0319L |
| NPD_Sets | FMRP-Ascano | 79813  | EHMT1     |
| NPD_Sets | FMRP-Ascano | 3954   | LETM1     |
| NPD_Sets | FMRP-Ascano | 51479  | ANKFY1    |
| NPD_Sets | FMRP-Ascano | 55226  | NAT10     |
| NPD_Sets | FMRP-Ascano | 91768  | CABLES1   |
| NPD_Sets | FMRP-Ascano | 55660  | PRPF40A   |
| NPD_Sets | FMRP-Ascano | 4670   | HNRNPM    |
| NPD_Sets | FMRP-Ascano | 51340  | CRNKL1    |
| NPD_Sets | FMRP-Ascano | 8729   | GBF1      |
| NPD_Sets | FMRP-Ascano | 7150   | TOP1      |
| NPD_Sets | FMRP-Ascano | 7109   | TRAPPC10  |
| NPD_Sets | FMRP-Ascano | 79711  | IPO4      |
| NPD_Sets | FMRP-Ascano | 4236   | MFAP1     |
| NPD_Sets | FMRP-Ascano | 23247  | KIAA0556  |
| NPD_Sets | FMRP-Ascano | 51603  | METTLL13  |
| NPD_Sets | FMRP-Ascano | 6461   | SHB       |
| NPD_Sets | FMRP-Ascano | 3064   | HTT       |
| NPD_Sets | FMRP-Ascano | 23030  | KDM4B     |
| NPD_Sets | FMRP-Ascano | 22893  | BAHD1     |
| NPD_Sets | FMRP-Ascano | 23020  | SNRNP200  |
| NPD_Sets | FMRP-Ascano | 26502  | NARF      |
| NPD_Sets | FMRP-Ascano | 57585  | CRAMP1L   |
| NPD_Sets | FMRP-Ascano | 8914   | TIMELESS  |
| NPD_Sets | FMRP-Ascano | 23380  | SRGAP2    |
| NPD_Sets | FMRP-Ascano | 7837   | PXDN      |
| NPD_Sets | FMRP-Ascano | 83903  | GSG2      |
| NPD_Sets | FMRP-Ascano | 23286  | WWC1      |
| NPD_Sets | FMRP-Ascano | 10061  | ABCF2     |
| NPD_Sets | FMRP-Ascano | 1376   | CPT2      |
| NPD_Sets | FMRP-Ascano | 23279  | NUP160    |
| NPD_Sets | FMRP-Ascano | 2975   | GTF3C1    |
| NPD_Sets | FMRP-Ascano | 79026  | AHNAK     |
| NPD_Sets | FMRP-Ascano | 309    | ANXA6     |
| NPD_Sets | FMRP-Ascano | 9700   | ESPL1     |

|          |             |        |          |
|----------|-------------|--------|----------|
| NPD_Sets | FMRP-Ascano | 6830   | SUPT6H   |
| NPD_Sets | FMRP-Ascano | 3708   | ITPR1    |
| NPD_Sets | FMRP-Ascano | 54535  | CCHCR1   |
| NPD_Sets | FMRP-Ascano | 23348  | DOCK9    |
| NPD_Sets | FMRP-Ascano | 84154  | RPF2     |
| NPD_Sets | FMRP-Ascano | 7184   | HSP90B1  |
| NPD_Sets | FMRP-Ascano | 23151  | GRAMD4   |
| NPD_Sets | FMRP-Ascano | 11188  | NISCH    |
| NPD_Sets | FMRP-Ascano | 7174   | TPP2     |
| NPD_Sets | FMRP-Ascano | 7517   | XRCC3    |
| NPD_Sets | FMRP-Ascano | 23239  | PHLPP1   |
| NPD_Sets | FMRP-Ascano | 47     | ACLY     |
| NPD_Sets | FMRP-Ascano | 9414   | TJP2     |
| NPD_Sets | FMRP-Ascano | 1778   | DYNC1H1  |
| NPD_Sets | FMRP-Ascano | 661    | POLR3D   |
| NPD_Sets | FMRP-Ascano | 5783   | PTPN13   |
| NPD_Sets | FMRP-Ascano | 10482  | NXF1     |
| NPD_Sets | FMRP-Ascano | 57568  | SIPA1L2  |
| NPD_Sets | FMRP-Ascano | 5297   | PI4KA    |
| NPD_Sets | FMRP-Ascano | 4920   | ROR2     |
| NPD_Sets | FMRP-Ascano | 154796 | AMOT     |
| NPD_Sets | FMRP-Ascano | 4645   | MYO5B    |
| NPD_Sets | FMRP-Ascano | 9924   | PAN2     |
| NPD_Sets | FMRP-Ascano | 8518   | IKBKAP   |
| NPD_Sets | FMRP-Ascano | 84059  | GPR98    |
| NPD_Sets | FMRP-Ascano | 10497  | UNC13B   |
| NPD_Sets | FMRP-Ascano | 57713  | SFMBT2   |
| NPD_Sets | FMRP-Ascano | 64215  | DNAJC1   |
| NPD_Sets | FMRP-Ascano | 57619  | SHROOM3  |
| NPD_Sets | FMRP-Ascano | 57221  | KIAA1244 |
| NPD_Sets | FMRP-Ascano | 83746  | L3MBTL2  |
| NPD_Sets | FMRP-Ascano | 7566   | ZNF18    |
| NPD_Sets | FMRP-Ascano | 57513  | CASKIN2  |
| NPD_Sets | FMRP-Ascano | 4038   | LRP4     |
| NPD_Sets | FMRP-Ascano | 23400  | ATP13A2  |
| NPD_Sets | FMRP-Ascano | 9875   | URB1     |
| NPD_Sets | FMRP-Ascano | 10939  | AFG3L2   |
| NPD_Sets | FMRP-Ascano | 51196  | PLCE1    |
| NPD_Sets | FMRP-Ascano | 55661  | DDX27    |
| NPD_Sets | FMRP-Ascano | 161    | AP2A2    |
| NPD_Sets | FMRP-Ascano | 1462   | VCAN     |
| NPD_Sets | FMRP-Ascano | 9682   | KDM4A    |
| NPD_Sets | FMRP-Ascano | 7153   | TOP2A    |
| NPD_Sets | FMRP-Ascano | 80222  | TARS2    |
| NPD_Sets | FMRP-Ascano | 4217   | MAP3K5   |
| NPD_Sets | FMRP-Ascano | 5190   | PEX6     |
| NPD_Sets | FMRP-Ascano | 8295   | TRRAP    |
| NPD_Sets | FMRP-Ascano | 64718  | UNKL     |
| NPD_Sets | FMRP-Ascano | 8632   | DNAH17   |
| NPD_Sets | FMRP-Ascano | 23049  | SMG1     |
| NPD_Sets | FMRP-Ascano | 57169  | ZNFX1    |
| NPD_Sets | FMRP-Ascano | 84079  | ANKRD27  |
| NPD_Sets | FMRP-Ascano | 3643   | INSR     |
| NPD_Sets | FMRP-Ascano | 27000  | DNAJC2   |
| NPD_Sets | FMRP-Ascano | 5394   | EXOSC10  |
| NPD_Sets | FMRP-Ascano | 121227 | LRIG3    |
| NPD_Sets | FMRP-Ascano | 91133  | L3MBTL4  |
| NPD_Sets | FMRP-Ascano | 55837  | EAPP     |



|          |             |        |           |
|----------|-------------|--------|-----------|
| NPD_Sets | FMRP-Ascano | 7249   | TSC2      |
| NPD_Sets | FMRP-Ascano | 7543   | ZFX       |
| NPD_Sets | FMRP-Ascano | 9508   | ADAMTS3   |
| NPD_Sets | FMRP-Ascano | 79980  | DSN1      |
| NPD_Sets | FMRP-Ascano | 8886   | DDX18     |
| NPD_Sets | FMRP-Ascano | 54520  | CCDC93    |
| NPD_Sets | FMRP-Ascano | 30836  | DNTTIP2   |
| NPD_Sets | FMRP-Ascano | 10594  | PRPF8     |
| NPD_Sets | FMRP-Ascano | 90441  | ZNF622    |
| NPD_Sets | FMRP-Ascano | 1786   | DNMT1     |
| NPD_Sets | FMRP-Ascano | 55665  | URGCP     |
| NPD_Sets | FMRP-Ascano | 23302  | WSCD1     |
| NPD_Sets | FMRP-Ascano | 51512  | GTSE1     |
| NPD_Sets | FMRP-Ascano | 11004  | KIF2C     |
| NPD_Sets | FMRP-Ascano | 8662   | EIF3B     |
| NPD_Sets | FMRP-Ascano | 8897   | MTMR3     |
| NPD_Sets | FMRP-Ascano | 5707   | PSMD1     |
| NPD_Sets | FMRP-Ascano | 25778  | DSTYK     |
| NPD_Sets | FMRP-Ascano | 10395  | DLC1      |
| NPD_Sets | FMRP-Ascano | 56288  | PARD3     |
| NPD_Sets | FMRP-Ascano | 56949  | XAB2      |
| NPD_Sets | FMRP-Ascano | 56259  | CTNBL1    |
| NPD_Sets | FMRP-Ascano | 29803  | REPIN1    |
| NPD_Sets | FMRP-Ascano | 334    | APLP2     |
| NPD_Sets | FMRP-Ascano | 57617  | VPS18     |
| NPD_Sets | FMRP-Ascano | 26999  | CYFIP2    |
| NPD_Sets | FMRP-Ascano | 63977  | PRDM15    |
| NPD_Sets | FMRP-Ascano | 29894  | CPSF1     |
| NPD_Sets | FMRP-Ascano | 56967  | C14orf132 |
| NPD_Sets | FMRP-Ascano | 55201  | MAP1S     |
| NPD_Sets | FMRP-Ascano | 55703  | POLR3B    |
| NPD_Sets | FMRP-Ascano | 63892  | THADA     |
| NPD_Sets | FMRP-Ascano | 3716   | JAK1      |
| NPD_Sets | FMRP-Ascano | 30849  | PIK3R4    |
| NPD_Sets | FMRP-Ascano | 5426   | POLE      |
| NPD_Sets | FMRP-Ascano | 8242   | KDM5C     |
| NPD_Sets | FMRP-Ascano | 9371   | KIF3B     |
| NPD_Sets | FMRP-Ascano | 4967   | OGDH      |
| NPD_Sets | FMRP-Ascano | 1495   | CTNNA1    |
| NPD_Sets | FMRP-Ascano | 6117   | RPA1      |
| NPD_Sets | FMRP-Ascano | 23370  | ARHGEF18  |
| NPD_Sets | FMRP-Ascano | 23140  | ZZEF1     |
| NPD_Sets | FMRP-Ascano | 54497  | HEATR5B   |
| NPD_Sets | FMRP-Ascano | 51594  | NBAS      |
| NPD_Sets | FMRP-Ascano | 7415   | VCP       |
| NPD_Sets | FMRP-Ascano | 23395  | LARS2     |
| NPD_Sets | FMRP-Ascano | 2734   | GLG1      |
| NPD_Sets | FMRP-Ascano | 3912   | LAMB1     |
| NPD_Sets | FMRP-Ascano | 25894  | PLEKHG4   |
| NPD_Sets | FMRP-Ascano | 8894   | EIF2S2    |
| NPD_Sets | FMRP-Ascano | 84181  | CHD6      |
| NPD_Sets | FMRP-Ascano | 7343   | UBTF      |
| NPD_Sets | FMRP-Ascano | 26230  | TIAM2     |
| NPD_Sets | FMRP-Ascano | 22853  | LMTK2     |
| NPD_Sets | FMRP-Ascano | 4650   | MYO9B     |
| NPD_Sets | FMRP-Ascano | 9265   | CYTH3     |
| NPD_Sets | FMRP-Ascano | 145567 | TTC7B     |
| NPD_Sets | FMRP-Ascano | 64135  | IFIH1     |

|          |             |        |          |
|----------|-------------|--------|----------|
| NPD_Sets | FMRP-Ascano | 3678   | ITGA5    |
| NPD_Sets | FMRP-Ascano | 89887  | ZNF628   |
| NPD_Sets | FMRP-Ascano | 29072  | SETD2    |
| NPD_Sets | FMRP-Ascano | 1951   | CELSR3   |
| NPD_Sets | FMRP-Ascano | 26018  | LRIG1    |
| NPD_Sets | FMRP-Ascano | 84733  | CBX2     |
| NPD_Sets | FMRP-Ascano | 55698  | RADIL    |
| NPD_Sets | FMRP-Ascano | 23005  | MAPKBP1  |
| NPD_Sets | FMRP-Ascano | 25973  | PARS2    |
| NPD_Sets | FMRP-Ascano | 5256   | PHKA2    |
| NPD_Sets | FMRP-Ascano | 10460  | TACC3    |
| NPD_Sets | FMRP-Ascano | 8312   | AXIN1    |
| NPD_Sets | FMRP-Ascano | 9869   | SETDB1   |
| NPD_Sets | FMRP-Ascano | 25929  | GEMIN5   |
| NPD_Sets | FMRP-Ascano | 23677  | SH3BP4   |
| NPD_Sets | FMRP-Ascano | 9688   | NUP93    |
| NPD_Sets | FMRP-Ascano | 3710   | ITPR3    |
| NPD_Sets | FMRP-Ascano | 23158  | TBC1D9   |
| NPD_Sets | FMRP-Ascano | 135114 | HINT3    |
| NPD_Sets | FMRP-Ascano | 23523  | CABIN1   |
| NPD_Sets | FMRP-Ascano | 124842 | TMEM132E |
| NPD_Sets | FMRP-Ascano | 24148  | PRPF6    |
| NPD_Sets | FMRP-Ascano | 5708   | PSMD2    |
| NPD_Sets | FMRP-Ascano | 55341  | LSG1     |
| NPD_Sets | FMRP-Ascano | 5836   | PYGL     |
| NPD_Sets | FMRP-Ascano | 221002 | RASGEF1A |
| NPD_Sets | FMRP-Ascano | 23644  | EDC4     |
| NPD_Sets | FMRP-Ascano | 157922 | CAMSAP1  |
| NPD_Sets | FMRP-Ascano | 63898  | SH2D4A   |
| NPD_Sets | FMRP-Ascano | 25885  | POLR1A   |
| NPD_Sets | FMRP-Ascano | 9129   | PRPF3    |
| NPD_Sets | FMRP-Ascano | 2195   | FAT1     |
| NPD_Sets | FMRP-Ascano | 114787 | GPRIN1   |
| NPD_Sets | FMRP-Ascano | 22880  | MORC2    |
| NPD_Sets | FMRP-Ascano | 7862   | BRPF1    |
| NPD_Sets | FMRP-Ascano | 6712   | SPTBN2   |
| NPD_Sets | FMRP-Ascano | 79149  | ZSCAN5A  |
| NPD_Sets | FMRP-Ascano | 63976  | PRDM16   |
| NPD_Sets | FMRP-Ascano | 10615  | SPAG5    |
| NPD_Sets | FMRP-Ascano | 9967   | THRAP3   |
| NPD_Sets | FMRP-Ascano | 23178  | PASK     |
| NPD_Sets | FMRP-Ascano | 8559   | PRPF18   |
| NPD_Sets | FMRP-Ascano | 8563   | THOC5    |
| NPD_Sets | FMRP-Ascano | 8925   | HERC1    |
| NPD_Sets | FMRP-Ascano | 26524  | LATS2    |
| NPD_Sets | FMRP-Ascano | 3709   | ITPR2    |
| NPD_Sets | FMRP-Ascano | 144100 | PLEKHA7  |
| NPD_Sets | FMRP-Ascano | 5976   | UPF1     |
| NPD_Sets | FMRP-Ascano | 27079  | RPUSD2   |
| NPD_Sets | FMRP-Ascano | 5335   | PLCG1    |
| NPD_Sets | FMRP-Ascano | 29890  | RBM15B   |
| NPD_Sets | FMRP-Ascano | 790    | CAD      |
| NPD_Sets | FMRP-Ascano | 84164  | ASCC2    |
| NPD_Sets | FMRP-Ascano | 3482   | IGF2R    |
| NPD_Sets | FMRP-Ascano | 93624  | TADA2B   |
| NPD_Sets | FMRP-Ascano | 7701   | ZNF142   |
| NPD_Sets | FMRP-Ascano | 23195  | MDN1     |
| NPD_Sets | FMRP-Ascano | 2316   | FLNA     |

|          |             |        |          |
|----------|-------------|--------|----------|
| NPD_Sets | FMRP-Ascano | 4288   | MKI67    |
| NPD_Sets | FMRP-Ascano | 9918   | NCAPD2   |
| NPD_Sets | FMRP-Ascano | 55229  | PANK4    |
| NPD_Sets | FMRP-Ascano | 5795   | PTPRJ    |
| NPD_Sets | FMRP-Ascano | 1659   | DHX8     |
| NPD_Sets | FMRP-Ascano | 9816   | URB2     |
| NPD_Sets | FMRP-Ascano | 9513   | FXR2     |
| NPD_Sets | FMRP-Ascano | 16     | AARS     |
| NPD_Sets | FMRP-Ascano | 57683  | ZDBF2    |
| NPD_Sets | FMRP-Ascano | 287    | ANK2     |
| NPD_Sets | FMRP-Ascano | 65123  | INTS3    |
| NPD_Sets | FMRP-Ascano | 3831   | KLC1     |
| NPD_Sets | FMRP-Ascano | 23242  | COBL     |
| NPD_Sets | FMRP-Ascano | 57680  | CHD8     |
| NPD_Sets | FMRP-Ascano | 23503  | ZFYVE26  |
| NPD_Sets | FMRP-Ascano | 50628  | GEMIN4   |
| NPD_Sets | FMRP-Ascano | 4642   | MYO1D    |
| NPD_Sets | FMRP-Ascano | 839    | CASP6    |
| NPD_Sets | FMRP-Ascano | 9620   | CELSR1   |
| NPD_Sets | FMRP-Ascano | 161725 | OTUD7A   |
| NPD_Sets | FMRP-Ascano | 4628   | MYH10    |
| NPD_Sets | FMRP-Ascano | 5550   | PREP     |
| NPD_Sets | FMRP-Ascano | 57510  | XPO5     |
| NPD_Sets | FMRP-Ascano | 9343   | EFTUD2   |
| NPD_Sets | FMRP-Ascano | 80271  | ITPKC    |
| NPD_Sets | FMRP-Ascano | 55755  | CDK5RAP2 |
| NPD_Sets | FMRP-Ascano | 55526  | DHTKD1   |
| NPD_Sets | FMRP-Ascano | 1662   | DDX10    |
| NPD_Sets | FMRP-Ascano | 8241   | RBM10    |
| NPD_Sets | FMRP-Ascano | 8924   | HERC2    |
| NPD_Sets | FMRP-Ascano | 23513  | SCRIB    |
| NPD_Sets | FMRP-Ascano | 4036   | LRP2     |
| NPD_Sets | FMRP-Ascano | 24144  | TFIP11   |
| NPD_Sets | FMRP-Ascano | 9903   | KLHL21   |
| NPD_Sets | FMRP-Ascano | 341640 | FREM2    |
| NPD_Sets | FMRP-Ascano | 57661  | PHRF1    |
| NPD_Sets | FMRP-Ascano | 26958  | COPG2    |
| NPD_Sets | FMRP-Ascano | 23774  | BRD1     |
| NPD_Sets | FMRP-Ascano | 23328  | SASH1    |
| NPD_Sets | FMRP-Ascano | 63967  | CLSPN    |
| NPD_Sets | FMRP-Ascano | 6594   | SMARCA1  |
| NPD_Sets | FMRP-Ascano | 9416   | DDX23    |
| NPD_Sets | FMRP-Ascano | 2201   | FBN2     |
| NPD_Sets | FMRP-Ascano | 10908  | PNPLA6   |
| NPD_Sets | FMRP-Ascano | 2200   | FBN1     |
| NPD_Sets | FMRP-Ascano | 9790   | BMS1     |
| NPD_Sets | FMRP-Ascano | 50485  | SMARCAL1 |
| NPD_Sets | FMRP-Ascano | 51191  | HERC5    |
| NPD_Sets | FMRP-Ascano | 1108   | CHD4     |
| NPD_Sets | FMRP-Ascano | 26024  | PTCD1    |
| NPD_Sets | FMRP-Ascano | 11128  | POLR3A   |
| NPD_Sets | FMRP-Ascano | 7204   | TRIO     |
| NPD_Sets | FMRP-Ascano | 6262   | RYR2     |
| NPD_Sets | FMRP-Ascano | 23392  | KIAA0368 |
| NPD_Sets | FMRP-Ascano | 79925  | SPEF2    |
| NPD_Sets | FMRP-Ascano | 23130  | ATG2A    |
| NPD_Sets | FMRP-Ascano | 57728  | WDR19    |
| NPD_Sets | FMRP-Ascano | 29889  | GNL2     |

|          |              |        |          |
|----------|--------------|--------|----------|
| NPD_Sets | FMRP-Ascano  | 9919   | SEC16A   |
| NPD_Sets | FMRP-Ascano  | 8642   | DCHS1    |
| NPD_Sets | FMRP-Ascano  | 2317   | FLNB     |
| NPD_Sets | FMRP-Ascano  | 1660   | DHX9     |
| NPD_Sets | FMRP-Ascano  | 10985  | GCN1L1   |
| NPD_Sets | FMRP-Ascano  | 116236 | ABHD15   |
| NPD_Sets | FMRP-Ascano  | 6709   | SPTAN1   |
| NPD_Sets | FMRP-Ascano  | 11325  | DDX42    |
| NPD_Sets | FMRP-Ascano  | 9231   | DLG5     |
| NPD_Sets | FMRP-Ascano  | 22984  | PDCD11   |
| NPD_Sets | FMRP-Ascano  | 2071   | ERCC3    |
| NPD_Sets | FMRP-Ascano  | 7094   | TLN1     |
| NPD_Sets | FMRP-Ascano  | 7290   | HIRA     |
| NPD_Sets | FMRP-Ascano  | 2475   | MTOR     |
| NPD_Sets | FMRP-Ascano  | 83481  | EPPK1    |
| NPD_Sets | FMRP-Ascano  | 7644   | ZNF91    |
| NPD_Sets | FMRP-Darnell | 8927   | BSN      |
| NPD_Sets | FMRP-Darnell | 547    | KIF1A    |
| NPD_Sets | FMRP-Darnell | 4130   | MAP1A    |
| NPD_Sets | FMRP-Darnell | 324    | APC      |
| NPD_Sets | FMRP-Darnell | 4131   | MAP1B    |
| NPD_Sets | FMRP-Darnell | 116986 | AGAP2    |
| NPD_Sets | FMRP-Darnell | 107    | ADCY1    |
| NPD_Sets | FMRP-Darnell | 22859  | LPHN1    |
| NPD_Sets | FMRP-Darnell | 26999  | CYFIP2   |
| NPD_Sets | FMRP-Darnell | 491    | ATP2B2   |
| NPD_Sets | FMRP-Darnell | 11188  | NISCH    |
| NPD_Sets | FMRP-Darnell | 23095  | KIF1B    |
| NPD_Sets | FMRP-Darnell | 5802   | PTPRS    |
| NPD_Sets | FMRP-Darnell | 50944  | SHANK1   |
| NPD_Sets | FMRP-Darnell | 10075  | HUWE1    |
| NPD_Sets | FMRP-Darnell | 3798   | KIF5A    |
| NPD_Sets | FMRP-Darnell | 576    | BAI2     |
| NPD_Sets | FMRP-Darnell | 8831   | SYNGAP1  |
| NPD_Sets | FMRP-Darnell | 478    | ATP1A3   |
| NPD_Sets | FMRP-Darnell | 2194   | FASN     |
| NPD_Sets | FMRP-Darnell | 23001  | WDFY3    |
| NPD_Sets | FMRP-Darnell | 5138   | PDE2A    |
| NPD_Sets | FMRP-Darnell | 1107   | CHD3     |
| NPD_Sets | FMRP-Darnell | 287    | ANK2     |
| NPD_Sets | FMRP-Darnell | 3708   | ITPR1    |
| NPD_Sets | FMRP-Darnell | 23154  | NCDN     |
| NPD_Sets | FMRP-Darnell | 3097   | HIVEP2   |
| NPD_Sets | FMRP-Darnell | 7267   | TTC3     |
| NPD_Sets | FMRP-Darnell | 3064   | HTT      |
| NPD_Sets | FMRP-Darnell | 9625   | AATK     |
| NPD_Sets | FMRP-Darnell | 9743   | ARHGAP32 |
| NPD_Sets | FMRP-Darnell | 22853  | LMTK2    |
| NPD_Sets | FMRP-Darnell | 1952   | CELSR2   |
| NPD_Sets | FMRP-Darnell | 815    | CAMK2A   |
| NPD_Sets | FMRP-Darnell | 1501   | CTNND2   |
| NPD_Sets | FMRP-Darnell | 1938   | EEF2     |
| NPD_Sets | FMRP-Darnell | 1759   | DNM1     |
| NPD_Sets | FMRP-Darnell | 57555  | NLGN2    |
| NPD_Sets | FMRP-Darnell | 6712   | SPTBN2   |
| NPD_Sets | FMRP-Darnell | 27445  | PCLO     |
| NPD_Sets | FMRP-Darnell | 2904   | GRIN2B   |
| NPD_Sets | FMRP-Darnell | 89795  | NAV3     |

|          |              |        |          |
|----------|--------------|--------|----------|
| NPD_Sets | FMRP-Darnell | 4035   | LRP1     |
| NPD_Sets | FMRP-Darnell | 57580  | PREX1    |
| NPD_Sets | FMRP-Darnell | 9379   | NRXN2    |
| NPD_Sets | FMRP-Darnell | 10297  | APC2     |
| NPD_Sets | FMRP-Darnell | 1742   | DLG4     |
| NPD_Sets | FMRP-Darnell | 4763   | NF1      |
| NPD_Sets | FMRP-Darnell | 23125  | CAMTA2   |
| NPD_Sets | FMRP-Darnell | 288    | ANK3     |
| NPD_Sets | FMRP-Darnell | 29     | ABR      |
| NPD_Sets | FMRP-Darnell | 92154  | MTSS1L   |
| NPD_Sets | FMRP-Darnell | 84894  | LINGO1   |
| NPD_Sets | FMRP-Darnell | 2901   | GRIK5    |
| NPD_Sets | FMRP-Darnell | 23077  | MYCBP2   |
| NPD_Sets | FMRP-Darnell | 10129  | FRY      |
| NPD_Sets | FMRP-Darnell | 4133   | MAP2     |
| NPD_Sets | FMRP-Darnell | 9612   | NCOR2    |
| NPD_Sets | FMRP-Darnell | 20     | ABCA2    |
| NPD_Sets | FMRP-Darnell | 6305   | SBF1     |
| NPD_Sets | FMRP-Darnell | 8567   | MADD     |
| NPD_Sets | FMRP-Darnell | 8911   | CACNA1I  |
| NPD_Sets | FMRP-Darnell | 22990  | PCNX     |
| NPD_Sets | FMRP-Darnell | 3800   | KIF5C    |
| NPD_Sets | FMRP-Darnell | 4644   | MYO5A    |
| NPD_Sets | FMRP-Darnell | 9472   | AKAP6    |
| NPD_Sets | FMRP-Darnell | 57030  | SLC17A7  |
| NPD_Sets | FMRP-Darnell | 8525   | DGKZ     |
| NPD_Sets | FMRP-Darnell | 23258  | DENND5A  |
| NPD_Sets | FMRP-Darnell | 8924   | HERC2    |
| NPD_Sets | FMRP-Darnell | 1778   | DYNC1H1  |
| NPD_Sets | FMRP-Darnell | 8502   | PKP4     |
| NPD_Sets | FMRP-Darnell | 667    | DST      |
| NPD_Sets | FMRP-Darnell | 575    | BAI1     |
| NPD_Sets | FMRP-Darnell | 57605  | PITPNM2  |
| NPD_Sets | FMRP-Darnell | 5297   | PI4KA    |
| NPD_Sets | FMRP-Darnell | 6709   | SPTAN1   |
| NPD_Sets | FMRP-Darnell | 23524  | SRRM2    |
| NPD_Sets | FMRP-Darnell | 1387   | CREBBP   |
| NPD_Sets | FMRP-Darnell | 26960  | NBEA     |
| NPD_Sets | FMRP-Darnell | 506    | ATP5B    |
| NPD_Sets | FMRP-Darnell | 80725  | SRCIN1   |
| NPD_Sets | FMRP-Darnell | 4967   | OGDH     |
| NPD_Sets | FMRP-Darnell | 9229   | DLGAP1   |
| NPD_Sets | FMRP-Darnell | 23046  | KIF21B   |
| NPD_Sets | FMRP-Darnell | 23400  | ATP13A2  |
| NPD_Sets | FMRP-Darnell | 6334   | SCN8A    |
| NPD_Sets | FMRP-Darnell | 23162  | MAPK8IP3 |
| NPD_Sets | FMRP-Darnell | 65268  | WNK2     |
| NPD_Sets | FMRP-Darnell | 83637  | ZMIZ2    |
| NPD_Sets | FMRP-Darnell | 146330 | FBXL16   |
| NPD_Sets | FMRP-Darnell | 8295   | TRRAP    |
| NPD_Sets | FMRP-Darnell | 6711   | SPTBN1   |
| NPD_Sets | FMRP-Darnell | 23061  | TBC1D9B  |
| NPD_Sets | FMRP-Darnell | 6651   | SON      |
| NPD_Sets | FMRP-Darnell | 5361   | PLXNA1   |
| NPD_Sets | FMRP-Darnell | 58512  | DLGAP3   |
| NPD_Sets | FMRP-Darnell | 10188  | TNK2     |
| NPD_Sets | FMRP-Darnell | 2909   | ARHGAP35 |
| NPD_Sets | FMRP-Darnell | 23164  | MPRIP    |

|          |              |        |          |
|----------|--------------|--------|----------|
| NPD_Sets | FMRP-Darnell | 6721   | SREBF2   |
| NPD_Sets | FMRP-Darnell | 26038  | CHD5     |
| NPD_Sets | FMRP-Darnell | 23129  | PLXND1   |
| NPD_Sets | FMRP-Darnell | 9479   | MAPK8IP1 |
| NPD_Sets | FMRP-Darnell | 9645   | MICAL2   |
| NPD_Sets | FMRP-Darnell | 5581   | PRKCE    |
| NPD_Sets | FMRP-Darnell | 6497   | SKI      |
| NPD_Sets | FMRP-Darnell | 65125  | WNK1     |
| NPD_Sets | FMRP-Darnell | 23025  | UNC13A   |
| NPD_Sets | FMRP-Darnell | 22980  | TCF25    |
| NPD_Sets | FMRP-Darnell | 1982   | EIF4G2   |
| NPD_Sets | FMRP-Darnell | 389813 | C9orf172 |
| NPD_Sets | FMRP-Darnell | 5522   | PPP2R2C  |
| NPD_Sets | FMRP-Darnell | 9901   | SRGAP3   |
| NPD_Sets | FMRP-Darnell | 2903   | GRIN2A   |
| NPD_Sets | FMRP-Darnell | 23152  | CIC      |
| NPD_Sets | FMRP-Darnell | 9568   | GABBR2   |
| NPD_Sets | FMRP-Darnell | 6812   | STXBP1   |
| NPD_Sets | FMRP-Darnell | 9611   | NCOR1    |
| NPD_Sets | FMRP-Darnell | 23261  | CAMTA1   |
| NPD_Sets | FMRP-Darnell | 5923   | RASGRF1  |
| NPD_Sets | FMRP-Darnell | 5127   | CDK16    |
| NPD_Sets | FMRP-Darnell | 3054   | HCFC1    |
| NPD_Sets | FMRP-Darnell | 22895  | RPH3A    |
| NPD_Sets | FMRP-Darnell | 773    | CACNA1A  |
| NPD_Sets | FMRP-Darnell | 10079  | ATP9A    |
| NPD_Sets | FMRP-Darnell | 9980   | DOPEY2   |
| NPD_Sets | FMRP-Darnell | 8997   | KALRN    |
| NPD_Sets | FMRP-Darnell | 23122  | CLASP2   |
| NPD_Sets | FMRP-Darnell | 115703 | ARHGAP33 |
| NPD_Sets | FMRP-Darnell | 8925   | HERC1    |
| NPD_Sets | FMRP-Darnell | 5178   | PEG3     |
| NPD_Sets | FMRP-Darnell | 80309  | SPHKAP   |
| NPD_Sets | FMRP-Darnell | 85358  | SHANK3   |
| NPD_Sets | FMRP-Darnell | 1740   | DLG2     |
| NPD_Sets | FMRP-Darnell | 55187  | VPS13D   |
| NPD_Sets | FMRP-Darnell | 9828   | ARHGEF17 |
| NPD_Sets | FMRP-Darnell | 9659   | PDE4DIP  |
| NPD_Sets | FMRP-Darnell | 1499   | CTNNB1   |
| NPD_Sets | FMRP-Darnell | 7204   | TRIO     |
| NPD_Sets | FMRP-Darnell | 83660  | TLN2     |
| NPD_Sets | FMRP-Darnell | 50488  | MINK1    |
| NPD_Sets | FMRP-Darnell | 9892   | SNAP91   |
| NPD_Sets | FMRP-Darnell | 23389  | MED13L   |
| NPD_Sets | FMRP-Darnell | 9600   | PITPNM1  |
| NPD_Sets | FMRP-Darnell | 23395  | LARS2    |
| NPD_Sets | FMRP-Darnell | 64324  | NSD1     |
| NPD_Sets | FMRP-Darnell | 2782   | GNB1     |
| NPD_Sets | FMRP-Darnell | 9578   | CDC42BPB |
| NPD_Sets | FMRP-Darnell | 2196   | FAT2     |
| NPD_Sets | FMRP-Darnell | 440279 | UNC13C   |
| NPD_Sets | FMRP-Darnell | 9736   | USP34    |
| NPD_Sets | FMRP-Darnell | 488    | ATP2A2   |
| NPD_Sets | FMRP-Darnell | 23040  | MYT1L    |
| NPD_Sets | FMRP-Darnell | 84446  | BRSK1    |
| NPD_Sets | FMRP-Darnell | 6252   | RTN1     |
| NPD_Sets | FMRP-Darnell | 399687 | MYO18A   |
| NPD_Sets | FMRP-Darnell | 57584  | ARHGAP21 |

|          |              |        |          |
|----------|--------------|--------|----------|
| NPD_Sets | FMRP-Darnell | 816    | CAMK2B   |
| NPD_Sets | FMRP-Darnell | 23348  | DOCK9    |
| NPD_Sets | FMRP-Darnell | 204851 | HIPK1    |
| NPD_Sets | FMRP-Darnell | 8941   | CDK5R2   |
| NPD_Sets | FMRP-Darnell | 84461  | NEURL4   |
| NPD_Sets | FMRP-Darnell | 5799   | PTPRN2   |
| NPD_Sets | FMRP-Darnell | 5792   | PTPRF    |
| NPD_Sets | FMRP-Darnell | 89796  | NAV1     |
| NPD_Sets | FMRP-Darnell | 1639   | DCTN1    |
| NPD_Sets | FMRP-Darnell | 161    | AP2A2    |
| NPD_Sets | FMRP-Darnell | 1808   | DPYSL2   |
| NPD_Sets | FMRP-Darnell | 23109  | DDN      |
| NPD_Sets | FMRP-Darnell | 4591   | TRIM37   |
| NPD_Sets | FMRP-Darnell | 23312  | DMXL2    |
| NPD_Sets | FMRP-Darnell | 51195  | RAPGEFL1 |
| NPD_Sets | FMRP-Darnell | 8239   | USP9X    |
| NPD_Sets | FMRP-Darnell | 130507 | UBR3     |
| NPD_Sets | FMRP-Darnell | 22883  | CLSTN1   |
| NPD_Sets | FMRP-Darnell | 23196  | FAM120A  |
| NPD_Sets | FMRP-Darnell | 22937  | SCAP     |
| NPD_Sets | FMRP-Darnell | 58506  | SCAF1    |
| NPD_Sets | FMRP-Darnell | 23096  | IQSEC2   |
| NPD_Sets | FMRP-Darnell | 23396  | PIP5K1C  |
| NPD_Sets | FMRP-Darnell | 6597   | SMARCA4  |
| NPD_Sets | FMRP-Darnell | 57575  | PCDH10   |
| NPD_Sets | FMRP-Darnell | 65009  | NDRG4    |
| NPD_Sets | FMRP-Darnell | 10125  | RASGRP1  |
| NPD_Sets | FMRP-Darnell | 114088 | TRIM9    |
| NPD_Sets | FMRP-Darnell | 111    | ADCY5    |
| NPD_Sets | FMRP-Darnell | 5579   | PRKCB    |
| NPD_Sets | FMRP-Darnell | 7074   | TIAM1    |
| NPD_Sets | FMRP-Darnell | 747    | DAGLA    |
| NPD_Sets | FMRP-Darnell | 25999  | CLIP3    |
| NPD_Sets | FMRP-Darnell | 6653   | SORL1    |
| NPD_Sets | FMRP-Darnell | 30000  | TNPO2    |
| NPD_Sets | FMRP-Darnell | 23365  | ARHGEF12 |
| NPD_Sets | FMRP-Darnell | 23274  | CLEC16A  |
| NPD_Sets | FMRP-Darnell | 22839  | DLGAP4   |
| NPD_Sets | FMRP-Darnell | 333    | APLP1    |
| NPD_Sets | FMRP-Darnell | 9853   | RUSC2    |
| NPD_Sets | FMRP-Darnell | 7067   | THRA     |
| NPD_Sets | FMRP-Darnell | 56977  | STOX2    |
| NPD_Sets | FMRP-Darnell | 10439  | OLFM1    |
| NPD_Sets | FMRP-Darnell | 160    | AP2A1    |
| NPD_Sets | FMRP-Darnell | 26037  | SIPA1L1  |
| NPD_Sets | FMRP-Darnell | 399909 | PCNXL3   |
| NPD_Sets | FMRP-Darnell | 7109   | TRAPPC10 |
| NPD_Sets | FMRP-Darnell | 477    | ATP1A2   |
| NPD_Sets | FMRP-Darnell | 23158  | TBC1D9   |
| NPD_Sets | FMRP-Darnell | 57524  | CASKIN1  |
| NPD_Sets | FMRP-Darnell | 5362   | PLXNA2   |
| NPD_Sets | FMRP-Darnell | 84630  | TTBK1    |
| NPD_Sets | FMRP-Darnell | 120114 | FAT3     |
| NPD_Sets | FMRP-Darnell | 3326   | HSP90AB1 |
| NPD_Sets | FMRP-Darnell | 777    | CACNA1E  |
| NPD_Sets | FMRP-Darnell | 50     | ACO2     |
| NPD_Sets | FMRP-Darnell | 57479  | PRR12    |
| NPD_Sets | FMRP-Darnell | 26115  | TANC2    |

|          |              |       |           |
|----------|--------------|-------|-----------|
| NPD_Sets | FMRP-Darnell | 23345 | SYNE1     |
| NPD_Sets | FMRP-Darnell | 23130 | ATG2A     |
| NPD_Sets | FMRP-Darnell | 22983 | MAST1     |
| NPD_Sets | FMRP-Darnell | 23214 | XPO6      |
| NPD_Sets | FMRP-Darnell | 55700 | MAP7D1    |
| NPD_Sets | FMRP-Darnell | 60    | ACTB      |
| NPD_Sets | FMRP-Darnell | 11122 | PTPRT     |
| NPD_Sets | FMRP-Darnell | 8913  | CACNA1G   |
| NPD_Sets | FMRP-Darnell | 1795  | DOCK3     |
| NPD_Sets | FMRP-Darnell | 9728  | SECISBP2L |
| NPD_Sets | FMRP-Darnell | 6601  | SMARCC2   |
| NPD_Sets | FMRP-Darnell | 28964 | GIT1      |
| NPD_Sets | FMRP-Darnell | 9829  | DNAJC6    |
| NPD_Sets | FMRP-Darnell | 27245 | AHDC1     |
| NPD_Sets | FMRP-Darnell | 1213  | CLTC      |
| NPD_Sets | FMRP-Darnell | 23139 | MAST2     |
| NPD_Sets | FMRP-Darnell | 10594 | PRPF8     |
| NPD_Sets | FMRP-Darnell | 23466 | CBX6      |
| NPD_Sets | FMRP-Darnell | 89910 | UBE3B     |
| NPD_Sets | FMRP-Darnell | 22848 | AAK1      |
| NPD_Sets | FMRP-Darnell | 57178 | ZMIZ1     |
| NPD_Sets | FMRP-Darnell | 9201  | DCLK1     |
| NPD_Sets | FMRP-Darnell | 23287 | AGTPBP1   |
| NPD_Sets | FMRP-Darnell | 3831  | KLC1      |
| NPD_Sets | FMRP-Darnell | 23332 | CLASP1    |
| NPD_Sets | FMRP-Darnell | 3745  | KCNB1     |
| NPD_Sets | FMRP-Darnell | 1108  | CHD4      |
| NPD_Sets | FMRP-Darnell | 6595  | SMARCA2   |
| NPD_Sets | FMRP-Darnell | 6853  | SYN1      |
| NPD_Sets | FMRP-Darnell | 57062 | DDX24     |
| NPD_Sets | FMRP-Darnell | 23504 | RIMBP2    |
| NPD_Sets | FMRP-Darnell | 23499 | MACF1     |
| NPD_Sets | FMRP-Darnell | 66008 | TRAK2     |
| NPD_Sets | FMRP-Darnell | 22906 | TRAK1     |
| NPD_Sets | FMRP-Darnell | 29123 | ANKRD11   |
| NPD_Sets | FMRP-Darnell | 6453  | ITSN1     |
| NPD_Sets | FMRP-Darnell | 2137  | EXTL3     |
| NPD_Sets | FMRP-Darnell | 85455 | DISP2     |
| NPD_Sets | FMRP-Darnell | 2915  | GRM5      |
| NPD_Sets | FMRP-Darnell | 1822  | ATN1      |
| NPD_Sets | FMRP-Darnell | 613   | BCR       |
| NPD_Sets | FMRP-Darnell | 56134 | PCDHAC2   |
| NPD_Sets | FMRP-Darnell | 57348 | TTYH1     |
| NPD_Sets | FMRP-Darnell | 84629 | TNRC18    |
| NPD_Sets | FMRP-Darnell | 3778  | KCNMA1    |
| NPD_Sets | FMRP-Darnell | 9969  | MED13     |
| NPD_Sets | FMRP-Darnell | 51663 | ZFR       |
| NPD_Sets | FMRP-Darnell | 9670  | IPO13     |
| NPD_Sets | FMRP-Darnell | 4915  | NTRK2     |
| NPD_Sets | FMRP-Darnell | 6857  | SYT1      |
| NPD_Sets | FMRP-Darnell | 9435  | CHST2     |
| NPD_Sets | FMRP-Darnell | 23518 | R3HDM1    |
| NPD_Sets | FMRP-Darnell | 6262  | RYR2      |
| NPD_Sets | FMRP-Darnell | 57448 | BIRC6     |
| NPD_Sets | FMRP-Darnell | 23181 | DIP2A     |
| NPD_Sets | FMRP-Darnell | 22997 | IGSF9B    |
| NPD_Sets | FMRP-Darnell | 8874  | ARHGEF7   |
| NPD_Sets | FMRP-Darnell | 2775  | GNAO1     |



|          |              |        |          |
|----------|--------------|--------|----------|
| NPD_Sets | FMRP-Darnell | 146057 | TTBK2    |
| NPD_Sets | FMRP-Darnell | 5662   | PSD      |
| NPD_Sets | FMRP-Darnell | 8476   | CDC42BPA |
| NPD_Sets | FMRP-Darnell | 4122   | MAN2A2   |
| NPD_Sets | FMRP-Darnell | 4734   | NEDD4    |
| NPD_Sets | FMRP-Darnell | 1981   | EIF4G1   |
| NPD_Sets | FMRP-Darnell | 56924  | PAK6     |
| NPD_Sets | FMRP-Darnell | 5413   | SEPT5    |
| NPD_Sets | FMRP-Darnell | 7317   | UBA1     |
| NPD_Sets | FMRP-Darnell | 57568  | SIPA1L2  |
| NPD_Sets | FMRP-Darnell | 23037  | PDZD2    |
| NPD_Sets | FMRP-Darnell | 25791  | NGEF     |
| NPD_Sets | FMRP-Darnell | 6319   | SCD      |
| NPD_Sets | FMRP-Darnell | 57476  | GRAMD1B  |
| NPD_Sets | FMRP-Darnell | 2774   | GNAL     |
| NPD_Sets | FMRP-Darnell | 3631   | INPP4A   |
| NPD_Sets | FMRP-Darnell | 153090 | DAB2IP   |
| NPD_Sets | FMRP-Darnell | 94030  | LRRC4B   |
| NPD_Sets | FMRP-Darnell | 4134   | MAP4     |
| NPD_Sets | FMRP-Darnell | 9500   | MAGED1   |
| NPD_Sets | FMRP-Darnell | 23507  | LRRC8B   |
| NPD_Sets | FMRP-Darnell | 283373 | ANKRD52  |
| NPD_Sets | FMRP-Darnell | 9732   | DOCK4    |
| NPD_Sets | FMRP-Darnell | 9066   | SYT7     |
| NPD_Sets | FMRP-Darnell | 2195   | FAT1     |
| NPD_Sets | FMRP-Darnell | 85442  | KNDC1    |
| NPD_Sets | FMRP-Darnell | 26173  | INTS1    |
| NPD_Sets | FMRP-Darnell | 26053  | AUTS2    |
| NPD_Sets | FMRP-Darnell | 8848   | TSC22D1  |
| NPD_Sets | FMRP-Darnell | 23174  | ZCCHC14  |
| NPD_Sets | FMRP-Darnell | 25769  | SLC24A2  |
| NPD_Sets | FMRP-Darnell | 2778   | GNAS     |
| NPD_Sets | FMRP-Darnell | 3340   | NDST1    |
| NPD_Sets | FMRP-Darnell | 57142  | RTN4     |
| NPD_Sets | FMRP-Darnell | 1463   | NCAN     |
| NPD_Sets | FMRP-Darnell | 2550   | GABBR1   |
| NPD_Sets | FMRP-Darnell | 3756   | KCNH1    |
| NPD_Sets | FMRP-Darnell | 2475   | MTOR     |
| NPD_Sets | FMRP-Darnell | 9448   | MAP4K4   |
| NPD_Sets | FMRP-Darnell | 79739  | TTLL7    |
| NPD_Sets | FMRP-Darnell | 9899   | SV2B     |
| NPD_Sets | FMRP-Darnell | 8507   | ENC1     |
| NPD_Sets | FMRP-Darnell | 29924  | EPN1     |
| NPD_Sets | FMRP-Darnell | 8408   | ULK1     |
| NPD_Sets | FMRP-Darnell | 4784   | NFIX     |
| NPD_Sets | FMRP-Darnell | 9344   | TAOK2    |
| NPD_Sets | FMRP-Darnell | 59269  | HIVEP3   |
| NPD_Sets | FMRP-Darnell | 57496  | MKL2     |
| NPD_Sets | FMRP-Darnell | 10777  | ARPP21   |
| NPD_Sets | FMRP-Darnell | 55870  | ASH1L    |
| NPD_Sets | FMRP-Darnell | 9256   | BZRAP1   |
| NPD_Sets | FMRP-Darnell | 80727  | TTYH3    |
| NPD_Sets | FMRP-Darnell | 2752   | GLUL     |
| NPD_Sets | FMRP-Darnell | 10985  | GCN1L1   |
| NPD_Sets | FMRP-Darnell | 1850   | DUSP8    |
| NPD_Sets | FMRP-Darnell | 8729   | GBF1     |
| NPD_Sets | FMRP-Darnell | 23049  | SMG1     |
| NPD_Sets | FMRP-Darnell | 2185   | PTK2B    |

|          |              |        |          |
|----------|--------------|--------|----------|
| NPD_Sets | FMRP-Darnell | 9378   | NRXN1    |
| NPD_Sets | FMRP-Darnell | 1951   | CELSR3   |
| NPD_Sets | FMRP-Darnell | 8404   | SPARCL1  |
| NPD_Sets | FMRP-Darnell | 6508   | SLC4A3   |
| NPD_Sets | FMRP-Darnell | 23623  | RUSC1    |
| NPD_Sets | FMRP-Darnell | 10142  | AKAP9    |
| NPD_Sets | FMRP-Darnell | 21     | ABCA3    |
| NPD_Sets | FMRP-Darnell | 8648   | NCOA1    |
| NPD_Sets | FMRP-Darnell | 23026  | MYO16    |
| NPD_Sets | FMRP-Darnell | 6543   | SLC8A2   |
| NPD_Sets | FMRP-Darnell | 28996  | HIPK2    |
| NPD_Sets | FMRP-Darnell | 9758   | FRMPD4   |
| NPD_Sets | FMRP-Darnell | 54542  | RC3H2    |
| NPD_Sets | FMRP-Darnell | 166336 | PRICKLE2 |
| NPD_Sets | FMRP-Darnell | 163    | AP2B1    |
| NPD_Sets | FMRP-Darnell | 6506   | SLC1A2   |
| NPD_Sets | FMRP-Darnell | 9043   | SPAG9    |
| NPD_Sets | FMRP-Darnell | 57609  | DIP2B    |
| NPD_Sets | FMRP-Darnell | 23316  | CUX2     |
| NPD_Sets | FMRP-Darnell | 11180  | WDR6     |
| NPD_Sets | FMRP-Darnell | 5339   | PLEC     |
| NPD_Sets | FMRP-Darnell | 29978  | UBQLN2   |
| NPD_Sets | FMRP-Darnell | 10444  | ZER1     |
| NPD_Sets | FMRP-Darnell | 23113  | CUL9     |
| NPD_Sets | FMRP-Darnell | 7216   | TRO      |
| NPD_Sets | FMRP-Darnell | 55102  | ATG2B    |
| NPD_Sets | FMRP-Darnell | 5098   | PCDHGC3  |
| NPD_Sets | FMRP-Darnell | 2889   | RAPGEF1  |
| NPD_Sets | FMRP-Darnell | 9320   | TRIP12   |
| NPD_Sets | FMRP-Darnell | 29888  | STRN4    |
| NPD_Sets | FMRP-Darnell | 23369  | PUM2     |
| NPD_Sets | FMRP-Darnell | 27125  | AFF4     |
| NPD_Sets | FMRP-Darnell | 23264  | ZC3H7B   |
| NPD_Sets | FMRP-Darnell | 9690   | UBE3C    |
| NPD_Sets | FMRP-Darnell | 2309   | FOXO3    |
| NPD_Sets | FMRP-Darnell | 5900   | RALGDS   |
| NPD_Sets | FMRP-Darnell | 65018  | PINK1    |
| NPD_Sets | FMRP-Darnell | 114787 | GPRIN1   |
| NPD_Sets | FMRP-Darnell | 9706   | ULK2     |
| NPD_Sets | FMRP-Darnell | 22982  | DIP2C    |
| NPD_Sets | FMRP-Darnell | 375449 | MAST4    |
| NPD_Sets | FMRP-Darnell | 9145   | SYNGR1   |
| NPD_Sets | FMRP-Darnell | 1612   | DAPK1    |
| NPD_Sets | FMRP-Darnell | 114783 | LMTK3    |
| NPD_Sets | FMRP-Darnell | 23248  | RPRD2    |
| NPD_Sets | FMRP-Darnell | 6616   | SNAP25   |
| NPD_Sets | FMRP-Darnell | 57554  | LRRC7    |
| NPD_Sets | FMRP-Darnell | 2033   | EP300    |
| NPD_Sets | FMRP-Darnell | 320    | APBA1    |
| NPD_Sets | FMRP-Darnell | 8189   | SYMPK    |
| NPD_Sets | FMRP-Darnell | 8867   | SYNJ1    |
| NPD_Sets | FMRP-Darnell | 8618   | CADPS    |
| NPD_Sets | FMRP-Darnell | 85446  | ZFHX2    |
| NPD_Sets | FMRP-Darnell | 23094  | SIPA1L3  |
| NPD_Sets | FMRP-Darnell | 10014  | HDAC5    |
| NPD_Sets | FMRP-Darnell | 7249   | TSC2     |
| NPD_Sets | FMRP-Darnell | 1152   | CKB      |
| NPD_Sets | FMRP-Darnell | 8671   | SLC4A4   |

|          |              |        |           |
|----------|--------------|--------|-----------|
| NPD_Sets | FMRP-Darnell | 9793   | CKAP5     |
| NPD_Sets | FMRP-Darnell | 10787  | NCKAP1    |
| NPD_Sets | FMRP-Darnell | 8943   | AP3D1     |
| NPD_Sets | FMRP-Darnell | 1826   | DSCAM     |
| NPD_Sets | FMRP-Darnell | 56995  | TULP4     |
| NPD_Sets | FMRP-Darnell | 23043  | TNIK      |
| NPD_Sets | FMRP-Darnell | 273    | AMPH      |
| NPD_Sets | FMRP-Darnell | 9228   | DLGAP2    |
| NPD_Sets | FMRP-Darnell | 9110   | MTMR4     |
| NPD_Sets | FMRP-Darnell | 5518   | PPP2R1A   |
| NPD_Sets | FMRP-Darnell | 3096   | HIVEP1    |
| NPD_Sets | FMRP-Darnell | 23284  | LPHN3     |
| NPD_Sets | FMRP-Darnell | 90990  | KIFC2     |
| NPD_Sets | FMRP-Darnell | 10194  | TSHZ1     |
| NPD_Sets | FMRP-Darnell | 63916  | ELMO2     |
| NPD_Sets | FMRP-Darnell | 3797   | KIF3C     |
| NPD_Sets | FMRP-Darnell | 57634  | EP400     |
| NPD_Sets | FMRP-Darnell | 388662 | SLC6A17   |
| NPD_Sets | FMRP-Darnell | 80003  | PCNXL2    |
| NPD_Sets | FMRP-Darnell | 283209 | PGM2L1    |
| NPD_Sets | FMRP-Darnell | 146664 | MGAT5B    |
| NPD_Sets | FMRP-Darnell | 26057  | ANKRD17   |
| NPD_Sets | FMRP-Darnell | 23054  | NCOA6     |
| NPD_Sets | FMRP-Darnell | 659    | BMPR2     |
| NPD_Sets | FMRP-Darnell | 801    | CALM1     |
| NPD_Sets | FMRP-Darnell | 5795   | PTPRJ     |
| NPD_Sets | FMRP-Darnell | 8851   | CDK5R1    |
| NPD_Sets | FMRP-Darnell | 6792   | CDKL5     |
| NPD_Sets | FMRP-Darnell | 134957 | STXBP5    |
| NPD_Sets | FMRP-Darnell | 7786   | MAP3K12   |
| NPD_Sets | FMRP-Darnell | 6925   | TCF4      |
| NPD_Sets | FMRP-Darnell | 3751   | KCND2     |
| NPD_Sets | FMRP-Darnell | 9905   | SGSM2     |
| NPD_Sets | FMRP-Darnell | 23074  | UHRF1BP1L |
| NPD_Sets | FMRP-Darnell | 57679  | ALS2      |
| NPD_Sets | FMRP-Darnell | 64743  | WDR13     |
| NPD_Sets | FMRP-Darnell | 808    | CALM3     |
| NPD_Sets | FMRP-Darnell | 22993  | HMGXB3    |
| NPD_Sets | FMRP-Darnell | 498    | ATP5A1    |
| NPD_Sets | FMRP-Darnell | 9369   | NRXN3     |
| NPD_Sets | FMRP-Darnell | 9698   | PUM1      |
| NPD_Sets | FMRP-Darnell | 1363   | CPE       |
| NPD_Sets | FMRP-Darnell | 57338  | JPH3      |
| NPD_Sets | FMRP-Darnell | 10919  | EHMT2     |
| NPD_Sets | FMRP-Darnell | 22864  | R3HDM2    |
| NPD_Sets | FMRP-Darnell | 23394  | ADNP      |
| NPD_Sets | FMRP-Darnell | 57148  | RALGAPB   |
| NPD_Sets | FMRP-Darnell | 610    | HCN2      |
| NPD_Sets | FMRP-Darnell | 1840   | DTX1      |
| NPD_Sets | FMRP-Darnell | 23416  | KCNH3     |
| NPD_Sets | FMRP-Darnell | 11113  | CIT       |
| NPD_Sets | FMRP-Darnell | 9867   | PJA2      |
| NPD_Sets | FMRP-Darnell | 23326  | USP22     |
| NPD_Sets | FMRP-Darnell | 10446  | LRRN2     |
| NPD_Sets | FMRP-Darnell | 5354   | PLP1      |
| NPD_Sets | FMRP-Darnell | 5530   | PPP3CA    |
| NPD_Sets | FMRP-Darnell | 79567  | FAM65A    |
| NPD_Sets | FMRP-Darnell | 9839   | ZEB2      |

|          |              |        |          |
|----------|--------------|--------|----------|
| NPD_Sets | FMRP-Darnell | 375790 | AGRN     |
| NPD_Sets | FMRP-Darnell | 57512  | GPR158   |
| NPD_Sets | FMRP-Darnell | 3996   | LLGL1    |
| NPD_Sets | FMRP-Darnell | 57680  | CHD8     |
| NPD_Sets | FMRP-Darnell | 54497  | HEATR5B  |
| NPD_Sets | FMRP-Darnell | 476    | ATP1A1   |
| NPD_Sets | FMRP-Darnell | 80243  | PREX2    |
| NPD_Sets | FMRP-Darnell | 253959 | RALGAPA1 |
| NPD_Sets | FMRP-Darnell | 4150   | MAZ      |
| NPD_Sets | FMRP-Darnell | 440073 | IQSEC3   |
| NPD_Sets | FMRP-Darnell | 9747   | FAM115A  |
| NPD_Sets | FMRP-Darnell | 22941  | SHANK2   |
| NPD_Sets | FMRP-Darnell | 55690  | PACS1    |
| NPD_Sets | FMRP-Darnell | 230    | ALDOC    |
| NPD_Sets | FMRP-Darnell | 1400   | CRMP1    |
| NPD_Sets | FMRP-Darnell | 503542 | SPRN     |
| NPD_Sets | FMRP-Darnell | 29767  | TMOD2    |
| NPD_Sets | FMRP-Darnell | 11033  | ADAP1    |
| NPD_Sets | FMRP-Darnell | 84687  | PPP1R9B  |
| NPD_Sets | FMRP-Darnell | 256472 | TMEM151A |
| NPD_Sets | FMRP-Darnell | 286    | ANK1     |
| NPD_Sets | FMRP-Darnell | 118987 | PDZD8    |
| NPD_Sets | FMRP-Darnell | 23286  | WWC1     |
| NPD_Sets | FMRP-Darnell | 55832  | CAND1    |
| NPD_Sets | FMRP-Darnell | 351    | APP      |
| NPD_Sets | FMRP-Darnell | 79633  | FAT4     |
| NPD_Sets | FMRP-Darnell | 162    | AP1B1    |
| NPD_Sets | FMRP-Darnell | 1958   | EGR1     |
| NPD_Sets | FMRP-Darnell | 23476  | BRD4     |
| NPD_Sets | FMRP-Darnell | 149041 | RC3H1    |
| NPD_Sets | FMRP-Darnell | 57447  | NDRG2    |
| NPD_Sets | FMRP-Darnell | 2902   | GRIN1    |
| NPD_Sets | FMRP-Darnell | 23523  | CABIN1   |
| NPD_Sets | FMRP-Darnell | 8242   | KDM5C    |
| NPD_Sets | FMRP-Darnell | 22843  | PPM1E    |
| NPD_Sets | FMRP-Darnell | 104    | ADARB1   |
| NPD_Sets | FMRP-Darnell | 5582   | PRKCG    |
| NPD_Sets | FMRP-Darnell | 7102   | TSPAN7   |
| NPD_Sets | FMRP-Darnell | 9282   | MED14    |
| NPD_Sets | FMRP-Darnell | 9024   | BRSK2    |
| NPD_Sets | FMRP-Darnell | 8936   | WASF1    |
| NPD_Sets | FMRP-Darnell | 1917   | EEF1A2   |
| NPD_Sets | FMRP-Darnell | 10612  | TRIM3    |
| NPD_Sets | FMRP-Darnell | 54878  | DPP8     |
| NPD_Sets | FMRP-Darnell | 23646  | PLD3     |
| NPD_Sets | FMRP-Darnell | 10499  | NCOA2    |
| NPD_Sets | FMRP-Darnell | 784    | CACNB3   |
| NPD_Sets | FMRP-Darnell | 3748   | KCNC3    |
| NPD_Sets | FMRP-Darnell | 3098   | HK1      |
| NPD_Sets | FMRP-Darnell | 9826   | ARHGEF11 |
| NPD_Sets | FMRP-Darnell | 79699  | ZYG11B   |
| NPD_Sets | FMRP-Darnell | 5728   | PTEN     |
| NPD_Sets | FMRP-Darnell | 283149 | BCL9L    |
| NPD_Sets | FMRP-Darnell | 5101   | PCDH9    |
| NPD_Sets | FMRP-Darnell | 5364   | PLXNB1   |
| NPD_Sets | FMRP-Darnell | 23321  | TRIM2    |
| NPD_Sets | FMRP-Darnell | 5310   | PKD1     |
| NPD_Sets | FMRP-Darnell | 9258   | MFHAS1   |

|          |              |        |          |
|----------|--------------|--------|----------|
| NPD_Sets | FMRP-Darnell | 26050  | SLITRK5  |
| NPD_Sets | FMRP-Darnell | 2899   | GRIK3    |
| NPD_Sets | FMRP-Darnell | 116987 | AGAP1    |
| NPD_Sets | FMRP-Darnell | 55095  | SAMD4B   |
| NPD_Sets | FMRP-Darnell | 10114  | HIPK3    |
| NPD_Sets | FMRP-Darnell | 3843   | IPO5     |
| NPD_Sets | FMRP-Darnell | 2186   | BPTF     |
| NPD_Sets | FMRP-Darnell | 481    | ATP1B1   |
| NPD_Sets | FMRP-Darnell | 4862   | NPAS2    |
| NPD_Sets | FMRP-Darnell | 9215   | LARGE    |
| NPD_Sets | FMRP-Darnell | 4037   | LRP3     |
| NPD_Sets | FMRP-Darnell | 23041  | MON2     |
| NPD_Sets | FMRP-Darnell | 9919   | SEC16A   |
| NPD_Sets | FMRP-Darnell | 57224  | NHSL1    |
| NPD_Sets | FMRP-Darnell | 23013  | SPEN     |
| NPD_Sets | FMRP-Darnell | 57551  | TAOK1    |
| NPD_Sets | FMRP-Darnell | 57468  | SLC12A5  |
| NPD_Sets | FMRP-Darnell | 473    | RERE     |
| NPD_Sets | FMRP-Darnell | 5099   | PCDH7    |
| NPD_Sets | FMRP-Darnell | 156    | ADRBK1   |
| NPD_Sets | FMRP-Darnell | 8470   | SORBS2   |
| NPD_Sets | FMRP-Darnell | 4900   | NRGN     |
| NPD_Sets | FMRP-Darnell | 57521  | RPTOR    |
| NPD_Sets | FMRP-Darnell | 55084  | SOBP     |
| NPD_Sets | FMRP-Darnell | 3899   | AFF3     |
| NPD_Sets | FMRP-Darnell | 84067  | FAM160A2 |
| NPD_Sets | FMRP-Darnell | 116984 | ARAP2    |
| NPD_Sets | FMRP-Darnell | 535    | ATP6V0A1 |
| NPD_Sets | FMRP-Darnell | 5793   | PTPRG    |
| NPD_Sets | FMRP-Darnell | 5649   | RELN     |
| NPD_Sets | FMRP-Darnell | 84181  | CHD6     |
| NPD_Sets | FMRP-Darnell | 1487   | CTBP1    |
| NPD_Sets | FMRP-Darnell | 6844   | VAMP2    |
| NPD_Sets | FMRP-Darnell | 51310  | SLC22A17 |
| NPD_Sets | FMRP-Darnell | 9900   | SV2A     |
| NPD_Sets | FMRP-Darnell | 57569  | ARHGAP20 |
| NPD_Sets | FMRP-Darnell | 55729  | ATF7IP   |
| NPD_Sets | FMRP-Darnell | 22907  | DHX30    |
| NPD_Sets | FMRP-Darnell | 5980   | REV3L    |
| NPD_Sets | FMRP-Darnell | 9498   | SLC4A8   |
| NPD_Sets | FMRP-Darnell | 11069  | RAPGEF4  |
| NPD_Sets | FMRP-Darnell | 79711  | IPO4     |
| NPD_Sets | FMRP-Darnell | 55777  | MBD5     |
| NPD_Sets | FMRP-Darnell | 114794 | ELFN2    |
| NPD_Sets | FMRP-Darnell | 23187  | PHLDB1   |
| NPD_Sets | FMRP-Darnell | 5789   | PTPRD    |
| NPD_Sets | FMRP-Darnell | 9990   | SLC12A6  |
| NPD_Sets | FMRP-Darnell | 23467  | NPTXR    |
| NPD_Sets | FMRP-Darnell | 10891  | PPARGC1A |
| NPD_Sets | FMRP-Darnell | 7025   | NR2F1    |
| NPD_Sets | FMRP-Darnell | 8660   | IRS2     |
| NPD_Sets | FMRP-Darnell | 9181   | ARHGEF2  |
| NPD_Sets | FMRP-Darnell | 9663   | LPIN2    |
| NPD_Sets | FMRP-Darnell | 9898   | UBAP2L   |
| NPD_Sets | FMRP-Darnell | 10313  | RTN3     |
| NPD_Sets | FMRP-Darnell | 441151 | TMEM151B |
| NPD_Sets | FMRP-Darnell | 6942   | TCF20    |
| NPD_Sets | FMRP-Darnell | 150726 | FBXO41   |

|          |              |        |          |
|----------|--------------|--------|----------|
| NPD_Sets | FMRP-Darnell | 26133  | TRPC4AP  |
| NPD_Sets | FMRP-Darnell | 2823   | GPM6A    |
| NPD_Sets | FMRP-Darnell | 5526   | PPP2R5B  |
| NPD_Sets | FMRP-Darnell | 23039  | XPO7     |
| NPD_Sets | FMRP-Darnell | 54972  | TMEM132A |
| NPD_Sets | FMRP-Darnell | 4155   | MBP      |
| NPD_Sets | FMRP-Darnell | 26470  | SEZ6L2   |
| NPD_Sets | FMRP-Darnell | 57582  | KCNT1    |
| NPD_Sets | FMRP-Darnell | 116988 | AGAP3    |
| NPD_Sets | FMRP-Darnell | 1523   | CUX1     |
| NPD_Sets | FMRP-Darnell | 57636  | ARHGAP23 |
| NPD_Sets | FMRP-Darnell | 161742 | SPRED1   |
| NPD_Sets | FMRP-Darnell | 23116  | FAM179B  |
| NPD_Sets | FMRP-Darnell | 339983 | NAT8L    |
| NPD_Sets | FMRP-Darnell | 57678  | GPAM     |
| NPD_Sets | FMRP-Darnell | 7532   | YWHAG    |
| NPD_Sets | FMRP-Darnell | 10025  | MED16    |
| NPD_Sets | FMRP-Darnell | 89797  | NAV2     |
| NPD_Sets | FMRP-Darnell | 165215 | FAM171B  |
| NPD_Sets | FMRP-Darnell | 10565  | ARFGEF1  |
| NPD_Sets | FMRP-Darnell | 11076  | TPPP     |
| NPD_Sets | FMRP-Darnell | 23405  | DICER1   |
| NPD_Sets | FMRP-Darnell | 3716   | JAK1     |
| NPD_Sets | FMRP-Darnell | 526    | ATP6V1B2 |
| NPD_Sets | FMRP-Darnell | 51754  | TMEM8B   |
| NPD_Sets | FMRP-Darnell | 4782   | NFIC     |
| NPD_Sets | FMRP-Darnell | 54413  | NLGN3    |
| NPD_Sets | FMRP-Darnell | 4651   | MYO10    |
| NPD_Sets | FMRP-Darnell | 6710   | SPTB     |
| NPD_Sets | FMRP-Darnell | 10814  | CPLX2    |
| NPD_Sets | FMRP-Darnell | 221692 | PHACTR1  |
| NPD_Sets | FMRP-Darnell | 84251  | SGIP1    |
| NPD_Sets | FMRP-Darnell | 377    | ARF3     |
| NPD_Sets | FMRP-Darnell | 8672   | EIF4G3   |
| NPD_Sets | FMRP-Darnell | 375323 | LHFPL4   |
| NPD_Sets | FMRP-Darnell | 23373  | CRTC1    |
| NPD_Sets | FMRP-Darnell | 200576 | PIKFYVE  |
| NPD_Sets | FMRP-Darnell | 23242  | COBL     |
| NPD_Sets | FMRP-Darnell | 2781   | GNAZ     |
| NPD_Sets | FMRP-Darnell | 51366  | UBR5     |
| NPD_Sets | FMRP-Darnell | 157922 | CAMSAP1  |
| NPD_Sets | FMRP-Darnell | 57169  | ZNFX1    |
| NPD_Sets | FMRP-Darnell | 145567 | TTC7B    |
| NPD_Sets | FMRP-Darnell | 80036  | TRPM3    |
| NPD_Sets | FMRP-Darnell | 23112  | TNRC6B   |
| NPD_Sets | FMRP-Darnell | 6624   | FSCN1    |
| NPD_Sets | FMRP-Darnell | 10395  | DLC1     |
| NPD_Sets | FMRP-Darnell | 118    | ADD1     |
| NPD_Sets | FMRP-Darnell | 2534   | FYN      |
| NPD_Sets | FMRP-Darnell | 9796   | PHYHIP   |
| NPD_Sets | FMRP-Darnell | 63893  | UBE2O    |
| NPD_Sets | FMRP-Darnell | 84861  | KLHL22   |
| NPD_Sets | FMRP-Darnell | 9759   | HDAC4    |
| NPD_Sets | FMRP-Darnell | 1762   | DMWD     |
| NPD_Sets | FMRP-Darnell | 10494  | STK25    |
| NPD_Sets | FMRP-Darnell | 8658   | TNKS     |
| NPD_Sets | FMRP-Darnell | 9854   | C2CD2L   |
| NPD_Sets | FMRP-Darnell | 9651   | PLCH2    |

|          |              |        |          |
|----------|--------------|--------|----------|
| NPD_Sets | FMRP-Darnell | 51230  | PHF20    |
| NPD_Sets | FMRP-Darnell | 9751   | SNPH     |
| NPD_Sets | FMRP-Darnell | 23328  | SASH1    |
| NPD_Sets | FMRP-Darnell | 22820  | COPG1    |
| NPD_Sets | FMRP-Darnell | 774    | CACNA1B  |
| NPD_Sets | FMRP-Darnell | 1123   | CHN1     |
| NPD_Sets | FMRP-Darnell | 9915   | ARNT2    |
| NPD_Sets | FMRP-Darnell | 5128   | CDK17    |
| NPD_Sets | FMRP-Darnell | 2043   | EPHA4    |
| NPD_Sets | FMRP-Darnell | 7384   | UQCRC1   |
| NPD_Sets | FMRP-Darnell | 6529   | SLC6A1   |
| NPD_Sets | FMRP-Darnell | 8522   | GAS7     |
| NPD_Sets | FMRP-Darnell | 64759  | TNS3     |
| NPD_Sets | FMRP-Darnell | 56907  | SPIRE1   |
| NPD_Sets | FMRP-Darnell | 6272   | SORT1    |
| NPD_Sets | FMRP-Darnell | 10000  | AKT3     |
| NPD_Sets | FMRP-Darnell | 11100  | HNRNPUL1 |
| NPD_Sets | FMRP-Darnell | 5727   | PTCH1    |
| NPD_Sets | FMRP-Darnell | 126129 | CPT1C    |
| NPD_Sets | FMRP-Darnell | 1267   | CNP      |
| NPD_Sets | FMRP-Darnell | 22954  | TRIM32   |
| NPD_Sets | FMRP-Darnell | 4684   | NCAM1    |
| NPD_Sets | FMRP-Darnell | 6397   | SEC14L1  |
| NPD_Sets | FMRP-Darnell | 57453  | DSCAML1  |
| NPD_Sets | FMRP-Darnell | 55964  | SEPT3    |
| NPD_Sets | FMRP-Darnell | 4916   | NTRK3    |
| NPD_Sets | FMRP-Darnell | 23420  | NOMO1    |
| NPD_Sets | FMRP-Darnell | 23677  | SH3BP4   |
| NPD_Sets | FMRP-Darnell | 782    | CACNB1   |
| NPD_Sets | FMRP-Darnell | 8622   | PDE8B    |
| NPD_Sets | FMRP-Darnell | 5142   | PDE4B    |
| NPD_Sets | FMRP-Darnell | 6297   | SALL2    |
| NPD_Sets | FMRP-Darnell | 4905   | NSF      |
| NPD_Sets | FMRP-Darnell | 9231   | DLG5     |
| NPD_Sets | FMRP-Darnell | 23135  | KDM6B    |
| NPD_Sets | FMRP-Darnell | 388    | RHOB     |
| NPD_Sets | FMRP-Darnell | 84444  | DOT1L    |
| NPD_Sets | FMRP-Darnell | 9619   | ABCG1    |
| NPD_Sets | FMRP-Darnell | 7804   | LRP8     |
| NPD_Sets | FMRP-Darnell | 84669  | USP32    |
| NPD_Sets | FMRP-Darnell | 54769  | DIRAS2   |
| NPD_Sets | FMRP-Darnell | 26025  | PCDHGA12 |
| NPD_Sets | FMRP-Darnell | 10381  | TUBB3    |
| NPD_Sets | FMRP-Darnell | 50649  | ARHGEF4  |
| NPD_Sets | FMRP-Darnell | 10645  | CAMKK2   |
| NPD_Sets | FMRP-Darnell | 401190 | RG57BP   |
| NPD_Sets | FMRP-Darnell | 84867  | PTPN5    |
| NPD_Sets | FMRP-Darnell | 8204   | NRIP1    |
| NPD_Sets | FMRP-Darnell | 23108  | RAP1GAP2 |
| NPD_Sets | FMRP-Darnell | 2975   | GTF3C1   |
| NPD_Sets | FMRP-Darnell | 3607   | FOXK2    |
| NPD_Sets | FMRP-Darnell | 79065  | ATG9A    |
| NPD_Sets | FMRP-Darnell | 2976   | GTF3C2   |
| NPD_Sets | FMRP-Darnell | 9863   | MAGI2    |
| NPD_Sets | FMRP-Darnell | 8541   | PPFIA3   |
| NPD_Sets | FMRP-Darnell | 23064  | SETX     |
| NPD_Sets | FMRP-Darnell | 23241  | PACS2    |
| NPD_Sets | FMRP-Darnell | 3785   | KCNQ2    |

|          |              |       |          |
|----------|--------------|-------|----------|
| NPD_Sets | FMRP-Darnell | 54620 | FBXL19   |
| NPD_Sets | FMRP-Darnell | 5430  | POLR2A   |
| NPD_Sets | FMRP-Darnell | 4209  | MEF2D    |
| NPD_Sets | FMRP-Darnell | 9865  | TRIL     |
| NPD_Sets | FMRP-Darnell | 11176 | BAZ2A    |
| NPD_Sets | FMRP-Darnell | 7090  | TLE3     |
| NPD_Sets | FMRP-Darnell | 9091  | PIGQ     |
| NPD_Sets | FMRP-Darnell | 84253 | GARNL3   |
| NPD_Sets | FMRP-Darnell | 79085 | SLC25A23 |
| NPD_Sets | FMRP-Darnell | 5594  | MAPK1    |
| NPD_Sets | FMRP-Darnell | 27087 | B3GAT1   |
| NPD_Sets | FMRP-Darnell | 55512 | SMPD3    |
| NPD_Sets | FMRP-Darnell | 23270 | TSPYL4   |
| NPD_Sets | FMRP-Darnell | 322   | APBB1    |
| NPD_Sets | FMRP-Darnell | 10893 | MMP24    |
| NPD_Sets | FMRP-Darnell | 493   | ATP2B4   |
| NPD_Sets | FMRP-Darnell | 60680 | CELF5    |
| NPD_Sets | FMRP-Darnell | 10290 | SPEG     |
| NPD_Sets | FMRP-Darnell | 23413 | NCS1     |
| NPD_Sets | FMRP-Darnell | 5596  | MAPK4    |
| NPD_Sets | FMRP-Darnell | 6546  | SLC8A1   |
| NPD_Sets | FMRP-Darnell | 9693  | RAPGEF2  |
| NPD_Sets | FMRP-Darnell | 56894 | AGPAT3   |
| NPD_Sets | FMRP-Darnell | 27239 | GPR162   |
| NPD_Sets | FMRP-Darnell | 5747  | PTK2     |
| NPD_Sets | FMRP-Darnell | 11346 | SYNPO    |
| NPD_Sets | FMRP-Darnell | 4928  | NUP98    |
| NPD_Sets | FMRP-Darnell | 9114  | ATP6VOD1 |
| NPD_Sets | FMRP-Darnell | 23221 | RHOBTB2  |
| NPD_Sets | FMRP-Darnell | 55362 | TMEM63B  |
| NPD_Sets | FMRP-Darnell | 23770 | FKBP8    |
| NPD_Sets | FMRP-Darnell | 10815 | CPLX1    |
| NPD_Sets | FMRP-Darnell | 1182  | CLCN3    |
| NPD_Sets | FMRP-Darnell | 2914  | GRM4     |
| NPD_Sets | FMRP-Darnell | 90249 | UNC5A    |
| NPD_Sets | FMRP-Darnell | 10484 | SEC23A   |
| NPD_Sets | FMRP-Darnell | 55074 | OXR1     |
| NPD_Sets | FMRP-Darnell | 4628  | MYH10    |
| NPD_Sets | FMRP-Darnell | 23051 | ZHX3     |
| NPD_Sets | FMRP-Darnell | 23149 | FCHO1    |
| NPD_Sets | FMRP-Darnell | 23005 | MAPKBP1  |
| NPD_Sets | FMRP-Darnell | 57534 | MIB1     |
| NPD_Sets | FMRP-Darnell | 7008  | TEF      |
| NPD_Sets | FMRP-Darnell | 84502 | JPH4     |
| NPD_Sets | FMRP-Darnell | 29979 | UBQLN1   |
| NPD_Sets | FMRP-Darnell | 8314  | BAP1     |
| NPD_Sets | FMRP-Darnell | 55450 | CAMK2N1  |
| NPD_Sets | FMRP-Darnell | 55209 | SETD5    |
| NPD_Sets | FMRP-Darnell | 79595 | SAP130   |
| NPD_Sets | FMRP-Darnell | 2932  | GSK3B    |
| NPD_Sets | FMRP-Darnell | 23300 | ATMIN    |
| NPD_Sets | FMRP-Darnell | 5187  | PER1     |
| NPD_Sets | FMRP-Darnell | 23047 | PDS5B    |
| NPD_Sets | FMRP-Darnell | 226   | ALDOA    |
| NPD_Sets | FMRP-Darnell | 5909  | RAP1GAP  |
| NPD_Sets | FMRP-Darnell | 55827 | DCAF6    |
| NPD_Sets | FMRP-Darnell | 90134 | KCNH7    |
| NPD_Sets | FMRP-Darnell | 1124  | CHN2     |



|          |               |        |          |
|----------|---------------|--------|----------|
| NPD_Sets | FMRP-Darnell  | 8078   | USP5     |
| NPD_Sets | FMRP-Darnell  | 66004  | LYNX1    |
| NPD_Sets | FMRP-Darnell  | 23148  | NACAD    |
| NPD_Sets | FMRP-Darnell  | 421    | ARVCF    |
| NPD_Sets | FMRP-Darnell  | 10489  | LRRC41   |
| NPD_Sets | FMRP-Darnell  | 3737   | KCNA2    |
| NPD_Sets | FMRP-Darnell  | 56144  | PCDHA4   |
| NPD_Sets | FMRP-Darnell  | 55605  | KIF21A   |
| NPD_Sets | FMRP-Darnell  | 1837   | DTNA     |
| NPD_Sets | FMRP-Darnell  | 57649  | PHF12    |
| NPD_Sets | FMRP-Darnell  | 5213   | PFKM     |
| NPD_Sets | FMRP-Darnell  | 5097   | PCDH1    |
| NPD_Sets | FMRP-Darnell  | 23236  | PLCB1    |
| NPD_Sets | FMRP-Darnell  | 53349  | ZFYVE1   |
| NPD_Sets | FMRP-Darnell  | 408    | ARRB1    |
| NPD_Sets | FMRP-Darnell  | 284434 | NWD1     |
| NPD_Sets | FMRP-Darnell  | 23030  | KDM4B    |
| NPD_Sets | FMRP-Darnell  | 65078  | RTN4R    |
| NPD_Sets | FMRP-Darnell  | 5781   | PTPN11   |
| NPD_Sets | FMRP-Darnell  | 23211  | ZC3H4    |
| NPD_Sets | FMRP-Darnell  | 64682  | ANAPC1   |
| NPD_Sets | FMRP-Darnell  | 348    | APOE     |
| NPD_Sets | FMRP-Darnell  | 6310   | ATXN1    |
| NPD_Sets | FMRP-Darnell  | 5567   | PRKACB   |
| NPD_Sets | FMRP-Darnell  | 23033  | DOPEY1   |
| NPD_Sets | FMRP-Darnell  | 3786   | KCNQ3    |
| NPD_Sets | FMRP-Darnell  | 47     | ACLY     |
| NPD_Sets | FMRP-Darnell  | 63827  | BCAN     |
| NPD_Sets | FMRP-Darnell  | 3069   | HDLBP    |
| NPD_Sets | FMRP-Darnell  | 9993   | DGCR2    |
| NPD_Sets | FMRP-Darnell  | 5660   | PSAP     |
| NPD_Sets | FMRP-Darnell  | 27072  | VPS41    |
| NPD_Sets | FMRP-Darnell  | 79813  | EHMT1    |
| NPD_Sets | FMRP-Darnell  | 24139  | EML2     |
| NPD_Sets | ID-candidates | 2517   | FUCA1    |
| NPD_Sets | ID-candidates | 6513   | SLC2A1   |
| NPD_Sets | ID-candidates | 6491   | STIL     |
| NPD_Sets | ID-candidates | 29929  | ALG6     |
| NPD_Sets | ID-candidates | 1629   | DBT      |
| NPD_Sets | ID-candidates | 4893   | NRAS     |
| NPD_Sets | ID-candidates | 3766   | KCNJ10   |
| NPD_Sets | ID-candidates | 259266 | ASPM     |
| NPD_Sets | ID-candidates | 23418  | CRB1     |
| NPD_Sets | ID-candidates | 343035 | RD3      |
| NPD_Sets | ID-candidates | 6905   | TBCE     |
| NPD_Sets | ID-candidates | 2271   | FH       |
| NPD_Sets | ID-candidates | 4613   | MYCN     |
| NPD_Sets | ID-candidates | 6654   | SOS1     |
| NPD_Sets | ID-candidates | 2071   | ERCC3    |
| NPD_Sets | ID-candidates | 22930  | RAB3GAP1 |
| NPD_Sets | ID-candidates | 9839   | ZEB2     |
| NPD_Sets | ID-candidates | 129880 | BBS5     |
| NPD_Sets | ID-candidates | 2571   | GAD1     |
| NPD_Sets | ID-candidates | 9759   | HDAC4    |
| NPD_Sets | ID-candidates | 51185  | CRBN     |
| NPD_Sets | ID-candidates | 285362 | SUMF1    |
| NPD_Sets | ID-candidates | 80746  | TSEN2    |
| NPD_Sets | ID-candidates | 5894   | RAF1     |

|          |               |        |          |
|----------|---------------|--------|----------|
| NPD_Sets | ID-candidates | 7048   | TGFBR2   |
| NPD_Sets | ID-candidates | 2720   | GLB1     |
| NPD_Sets | ID-candidates | 200894 | ARL13B   |
| NPD_Sets | ID-candidates | 84100  | ARL6     |
| NPD_Sets | ID-candidates | 545    | ATR      |
| NPD_Sets | ID-candidates | 10195  | ALG3     |
| NPD_Sets | ID-candidates | 9711   | KIAA0226 |
| NPD_Sets | ID-candidates | 57545  | CC2D2A   |
| NPD_Sets | ID-candidates | 5860   | QDPR     |
| NPD_Sets | ID-candidates | 79644  | SRD5A3   |
| NPD_Sets | ID-candidates | 8671   | SLC4A4   |
| NPD_Sets | ID-candidates | 55212  | BBS7     |
| NPD_Sets | ID-candidates | 166379 | BBS12    |
| NPD_Sets | ID-candidates | 9227   | LRAT     |
| NPD_Sets | ID-candidates | 175    | AGA      |
| NPD_Sets | ID-candidates | 56172  | ANKH     |
| NPD_Sets | ID-candidates | 4338   | MOCS2    |
| NPD_Sets | ID-candidates | 1161   | ERCC8    |
| NPD_Sets | ID-candidates | 347733 | TUBB2B   |
| NPD_Sets | ID-candidates | 4758   | NEU1     |
| NPD_Sets | ID-candidates | 4337   | MOCS1    |
| NPD_Sets | ID-candidates | 26503  | SLC17A5  |
| NPD_Sets | ID-candidates | 167691 | LCA5     |
| NPD_Sets | ID-candidates | 594    | BCKDHB   |
| NPD_Sets | ID-candidates | 2898   | GRIK2    |
| NPD_Sets | ID-candidates | 55084  | SOBP     |
| NPD_Sets | ID-candidates | 3908   | LAMA2    |
| NPD_Sets | ID-candidates | 383    | ARG1     |
| NPD_Sets | ID-candidates | 5191   | PEX7     |
| NPD_Sets | ID-candidates | 404672 | GTF2H5   |
| NPD_Sets | ID-candidates | 27241  | BBS9     |
| NPD_Sets | ID-candidates | 2990   | GUSB     |
| NPD_Sets | ID-candidates | 9179   | AP4M1    |
| NPD_Sets | ID-candidates | 5649   | RELN     |
| NPD_Sets | ID-candidates | 1738   | DLD      |
| NPD_Sets | ID-candidates | 3614   | IMPDH1   |
| NPD_Sets | ID-candidates | 79648  | MCPH1    |
| NPD_Sets | ID-candidates | 7991   | TUSC3    |
| NPD_Sets | ID-candidates | 91147  | TMEM67   |
| NPD_Sets | ID-candidates | 51305  | KCNK9    |
| NPD_Sets | ID-candidates | 83696  | TRAPPC9  |
| NPD_Sets | ID-candidates | 7436   | VLDLR    |
| NPD_Sets | ID-candidates | 7046   | TGFBR1   |
| NPD_Sets | ID-candidates | 2218   | FKTN     |
| NPD_Sets | ID-candidates | 22954  | TRIM32   |
| NPD_Sets | ID-candidates | 55755  | CDK5RAP2 |
| NPD_Sets | ID-candidates | 6709   | SPTAN1   |
| NPD_Sets | ID-candidates | 56623  | INPP5E   |
| NPD_Sets | ID-candidates | 2074   | ERCC6    |
| NPD_Sets | ID-candidates | 26128  | KIAA1279 |
| NPD_Sets | ID-candidates | 9126   | SMC3     |
| NPD_Sets | ID-candidates | 8036   | SHOC2    |
| NPD_Sets | ID-candidates | 79751  | SLC25A22 |
| NPD_Sets | ID-candidates | 5080   | PAX6     |
| NPD_Sets | ID-candidates | 55343  | SLC35C1  |
| NPD_Sets | ID-candidates | 51259  | TMEM216  |
| NPD_Sets | ID-candidates | 582    | BBS1     |
| NPD_Sets | ID-candidates | 79053  | ALG8     |

|          |               |        |          |
|----------|---------------|--------|----------|
| NPD_Sets | ID-candidates | 9440   | MED17    |
| NPD_Sets | ID-candidates | 79796  | ALG9     |
| NPD_Sets | ID-candidates | 867    | CBL      |
| NPD_Sets | ID-candidates | 5818   | PVRL1    |
| NPD_Sets | ID-candidates | 84623  | KIRREL3  |
| NPD_Sets | ID-candidates | 7846   | TUBA1A   |
| NPD_Sets | ID-candidates | 57609  | DIP2B    |
| NPD_Sets | ID-candidates | 6821   | SUOX     |
| NPD_Sets | ID-candidates | 79738  | BBS10    |
| NPD_Sets | ID-candidates | 79158  | GNPTAB   |
| NPD_Sets | ID-candidates | 3479   | IGF1     |
| NPD_Sets | ID-candidates | 23545  | ATP6V0A2 |
| NPD_Sets | ID-candidates | 55835  | CENPJ    |
| NPD_Sets | ID-candidates | 10166  | SLC25A15 |
| NPD_Sets | ID-candidates | 2073   | ERCC5    |
| NPD_Sets | ID-candidates | 1282   | COL4A1   |
| NPD_Sets | ID-candidates | 57096  | RPGRIP1  |
| NPD_Sets | ID-candidates | 4247   | MGAT2    |
| NPD_Sets | ID-candidates | 145226 | RDH12    |
| NPD_Sets | ID-candidates | 29954  | POMT2    |
| NPD_Sets | ID-candidates | 2581   | GALC     |
| NPD_Sets | ID-candidates | 55812  | SPATA7   |
| NPD_Sets | ID-candidates | 123016 | TTC8     |
| NPD_Sets | ID-candidates | 7443   | VRK1     |
| NPD_Sets | ID-candidates | 161742 | SPRED1   |
| NPD_Sets | ID-candidates | 22995  | CEP152   |
| NPD_Sets | ID-candidates | 23431  | AP4E1    |
| NPD_Sets | ID-candidates | 585    | BBS4     |
| NPD_Sets | ID-candidates | 84572  | GNPTG    |
| NPD_Sets | ID-candidates | 57465  | TBC1D24  |
| NPD_Sets | ID-candidates | 5373   | PMM2     |
| NPD_Sets | ID-candidates | 583    | BBS2     |
| NPD_Sets | ID-candidates | 9289   | GPR56    |
| NPD_Sets | ID-candidates | 84342  | COG8     |
| NPD_Sets | ID-candidates | 1013   | CDH15    |
| NPD_Sets | ID-candidates | 23746  | AIPL1    |
| NPD_Sets | ID-candidates | 9526   | MPDU1    |
| NPD_Sets | ID-candidates | 113235 | SLC46A1  |
| NPD_Sets | ID-candidates | 2670   | GFAP     |
| NPD_Sets | ID-candidates | 54903  | MKS1     |
| NPD_Sets | ID-candidates | 9382   | COG1     |
| NPD_Sets | ID-candidates | 283989 | TSEN54   |
| NPD_Sets | ID-candidates | 26040  | SETBP1   |
| NPD_Sets | ID-candidates | 6925   | TCF4     |
| NPD_Sets | ID-candidates | 5605   | MAP2K2   |
| NPD_Sets | ID-candidates | 57192  | MCOLN1   |
| NPD_Sets | ID-candidates | 54862  | CC2D1A   |
| NPD_Sets | ID-candidates | 284403 | WDR62    |
| NPD_Sets | ID-candidates | 593    | BCKDHA   |
| NPD_Sets | ID-candidates | 2068   | ERCC2    |
| NPD_Sets | ID-candidates | 2067   | ERCC1    |
| NPD_Sets | ID-candidates | 79147  | FKRP     |
| NPD_Sets | ID-candidates | 1406   | CRX      |
| NPD_Sets | ID-candidates | 11284  | PNKP     |
| NPD_Sets | ID-candidates | 1789   | DNMT3B   |
| NPD_Sets | ID-candidates | 9342   | SNAP29   |
| NPD_Sets | ID-candidates | 9215   | LARGE    |
| NPD_Sets | ID-candidates | 2033   | EP300    |

|          |               |        |          |
|----------|---------------|--------|----------|
| NPD_Sets | ID-candidates | 79087  | ALG12    |
| NPD_Sets | ID-candidates | 5476   | CTSA     |
| NPD_Sets | ID-candidates | 10564  | ARFGEF2  |
| NPD_Sets | ID-candidates | 8813   | DPM1     |
| NPD_Sets | ID-candidates | 875    | CBS      |
| NPD_Sets | ID-candidates | 5116   | PCNT     |
| NPD_Sets | ID-candidates | 3052   | HCCS     |
| NPD_Sets | ID-candidates | 8481   | OFD1     |
| NPD_Sets | ID-candidates | 2187   | FANCB    |
| NPD_Sets | ID-candidates | 5160   | PDHA1    |
| NPD_Sets | ID-candidates | 6197   | RPS6KA3  |
| NPD_Sets | ID-candidates | 6611   | SMS      |
| NPD_Sets | ID-candidates | 2710   | GK       |
| NPD_Sets | ID-candidates | 7102   | TSPAN7   |
| NPD_Sets | ID-candidates | 54880  | BCOR     |
| NPD_Sets | ID-candidates | 10159  | ATP6AP2  |
| NPD_Sets | ID-candidates | 4128   | MAOA     |
| NPD_Sets | ID-candidates | 7592   | ZNF41    |
| NPD_Sets | ID-candidates | 64840  | PORCN    |
| NPD_Sets | ID-candidates | 6855   | SYP      |
| NPD_Sets | ID-candidates | 57477  | SHROOM4  |
| NPD_Sets | ID-candidates | 3028   | HSD17B10 |
| NPD_Sets | ID-candidates | 10075  | HUWE1    |
| NPD_Sets | ID-candidates | 11279  | KLF8     |
| NPD_Sets | ID-candidates | 23229  | ARHGEF9  |
| NPD_Sets | ID-candidates | 3476   | IGBP1    |
| NPD_Sets | ID-candidates | 1741   | DLG3     |
| NPD_Sets | ID-candidates | 6567   | SLC16A2  |
| NPD_Sets | ID-candidates | 84061  | MAGT1    |
| NPD_Sets | ID-candidates | 538    | ATP7A    |
| NPD_Sets | ID-candidates | 5230   | PGK1     |
| NPD_Sets | ID-candidates | 254065 | BRWD3    |
| NPD_Sets | ID-candidates | 7552   | ZNF711   |
| NPD_Sets | ID-candidates | 27286  | SRPX2    |
| NPD_Sets | ID-candidates | 1678   | TIMM8A   |
| NPD_Sets | ID-candidates | 5354   | PLP1     |
| NPD_Sets | ID-candidates | 5631   | PRPS1    |
| NPD_Sets | ID-candidates | 5063   | PAK3     |
| NPD_Sets | ID-candidates | 7319   | UBE2A    |
| NPD_Sets | ID-candidates | 4694   | NDUFA1   |
| NPD_Sets | ID-candidates | 8450   | CUL4B    |
| NPD_Sets | ID-candidates | 51114  | ZDHHC9   |
| NPD_Sets | ID-candidates | 2719   | GPC3     |
| NPD_Sets | ID-candidates | 3251   | HPRT1    |
| NPD_Sets | ID-candidates | 6658   | SOX3     |
| NPD_Sets | ID-candidates | 50814  | NSDHL    |
| NPD_Sets | ID-candidates | 215    | ABCD1    |
| NPD_Sets | ID-candidates | 554    | AVPR2    |
| NPD_Sets | ID-candidates | 2316   | FLNA     |
| NPD_Sets | ID-candidates | 2664   | GDI1     |
| NPD_Sets | ID-candidates | 8517   | IKBK     |
| NPD_Sets | ID-candidates | 1736   | DKC1     |
| NPD_Sets | ID-denovo-lof | 9204   | ZMYM6    |
| NPD_Sets | ID-denovo-lof | 23040  | MYT1L    |
| NPD_Sets | ID-denovo-lof | 1499   | CTNNB1   |
| NPD_Sets | ID-denovo-lof | 10492  | SYNCRIP  |
| NPD_Sets | ID-denovo-lof | 4036   | LRP2     |
| NPD_Sets | ID-denovo-lof | 7846   | TUBA1A   |

|          |                  |           |          |
|----------|------------------|-----------|----------|
| NPD_Sets | ID-denovo-lof    | 5160      | PDHA1    |
| NPD_Sets | ID-denovo-lof    | 2888      | GRB14    |
| NPD_Sets | ID-denovo-lof    | 6326      | SCN2A    |
| NPD_Sets | ID-denovo-lof    | 25820     | ARIH1    |
| NPD_Sets | ID-denovo-lof    | 1654      | DDX3X    |
| NPD_Sets | ID-denovo-lof    | 8831      | SYNGAP1  |
| NPD_Sets | ID-denovo-lof    | 23036     | ZNF292   |
| NPD_Sets | ID-denovo-lof    | 6529      | SLC6A1   |
| NPD_Sets | ID-denovo-lof    | 4214      | MAP3K1   |
| NPD_Sets | ID-denovo-lof    | 55209     | SETD5    |
| NPD_Sets | ID-denovo-lof    | 283471    | TMPRSS12 |
| NPD_Sets | ID-denovo-lof    | 55023     | PHIP     |
| NPD_Sets | ID-denovo-lof    | 4520      | MTF1     |
| NPD_Sets | ID-denovo-lof    | 23096     | IQSEC2   |
| NPD_Sets | ID-denovo-lof    | 3097      | HIVEP2   |
| NPD_Sets | ID-denovo-lof    | 4204      | MECP2    |
| NPD_Sets | ID-denovo-lof    | 57459     | GATAD2B  |
| NPD_Sets | ID-denovo-lof    | 1106      | CHD2     |
| NPD_Sets | ID-denovo-lof    | 6812      | STXBP1   |
| NPD_Sets | ID-denovo-lof    | 26040     | SETBP1   |
| NPD_Sets | ID-denovo-lof    | 51322     | WAC      |
| NPD_Sets | ID-denovo-lof    | 8546      | AP3B1    |
| NPD_Sets | ID-denovo-lof    | 83852     | SETDB2   |
| NPD_Sets | ID-denovo-lof    | 283489    | CHAMP1   |
| NPD_Sets | ID-denovo-nonsyn | 1496      | CTNNA2   |
| NPD_Sets | ID-denovo-nonsyn | 10472     | ZBTB18   |
| NPD_Sets | ID-denovo-nonsyn | 6812      | STXBP1   |
| NPD_Sets | ID-denovo-nonsyn | 55209     | SETD5    |
| NPD_Sets | ID-denovo-nonsyn | 10522     | DEAF1    |
| NPD_Sets | ID-denovo-nonsyn | 83852     | SETDB2   |
| NPD_Sets | ID-denovo-nonsyn | 23040     | MYT1L    |
| NPD_Sets | ID-denovo-nonsyn | 283489    | CHAMP1   |
| NPD_Sets | ID-denovo-nonsyn | 4204      | MECP2    |
| NPD_Sets | ID-denovo-nonsyn | 1654      | DDX3X    |
| NPD_Sets | ID-denovo-nonsyn | 4292      | MLH1     |
| NPD_Sets | ID-denovo-nonsyn | 23314     | SATB2    |
| NPD_Sets | ID-denovo-nonsyn | 48        | ACO1     |
| NPD_Sets | ID-denovo-nonsyn | 55023     | PHIP     |
| NPD_Sets | ID-denovo-nonsyn | 6326      | SCN2A    |
| NPD_Sets | ID-denovo-nonsyn | 25791     | NGEF     |
| NPD_Sets | ID-denovo-nonsyn | 10564     | ARFGEF2  |
| NPD_Sets | ID-denovo-nonsyn | 4035      | LRP1     |
| NPD_Sets | ID-denovo-nonsyn | 4036      | LRP2     |
| NPD_Sets | ID-denovo-nonsyn | 1261      | CNGA3    |
| NPD_Sets | ID-denovo-nonsyn | 10274     | STAG1    |
| NPD_Sets | ID-denovo-nonsyn | 10492     | SYNCRIP  |
| NPD_Sets | ID-denovo-nonsyn | 283471    | TMPRSS12 |
| NPD_Sets | ID-denovo-nonsyn | 160851    | DGKH     |
| NPD_Sets | ID-denovo-nonsyn | 56660     | KCNK12   |
| NPD_Sets | ID-denovo-nonsyn | 238       | ALK      |
| NPD_Sets | ID-denovo-nonsyn | 100137047 | JMJD7    |
| NPD_Sets | ID-denovo-nonsyn | 221692    | PHACTR1  |
| NPD_Sets | ID-denovo-nonsyn | 4214      | MAP3K1   |
| NPD_Sets | ID-denovo-nonsyn | 401285    | TCP10L2  |
| NPD_Sets | ID-denovo-nonsyn | 23096     | IQSEC2   |
| NPD_Sets | ID-denovo-nonsyn | 6721      | SREBF2   |
| NPD_Sets | ID-denovo-nonsyn | 1778      | DYNC1H1  |
| NPD_Sets | ID-denovo-nonsyn | 6513      | SLC2A1   |

|          |                  |        |          |
|----------|------------------|--------|----------|
| NPD_Sets | ID-denovo-nonsyn | 904    | CCNT1    |
| NPD_Sets | ID-denovo-nonsyn | 4643   | MYO1E    |
| NPD_Sets | ID-denovo-nonsyn | 6334   | SCN8A    |
| NPD_Sets | ID-denovo-nonsyn | 128611 | ZNF831   |
| NPD_Sets | ID-denovo-nonsyn | 7846   | TUBA1A   |
| NPD_Sets | ID-denovo-nonsyn | 4705   | NDUFA10  |
| NPD_Sets | ID-denovo-nonsyn | 5688   | PSMA7    |
| NPD_Sets | ID-denovo-nonsyn | 9940   | DLEC1    |
| NPD_Sets | ID-denovo-nonsyn | 4225   | MEP1B    |
| NPD_Sets | ID-denovo-nonsyn | 57459  | GATAD2B  |
| NPD_Sets | ID-denovo-nonsyn | 5160   | PDHA1    |
| NPD_Sets | ID-denovo-nonsyn | 10487  | CAP1     |
| NPD_Sets | ID-denovo-nonsyn | 146664 | MGAT5B   |
| NPD_Sets | ID-denovo-nonsyn | 90592  | ZNF700   |
| NPD_Sets | ID-denovo-nonsyn | 8260   | NAA10    |
| NPD_Sets | ID-denovo-nonsyn | 3800   | KIF5C    |
| NPD_Sets | ID-denovo-nonsyn | 23036  | ZNF292   |
| NPD_Sets | ID-denovo-nonsyn | 7204   | TRIO     |
| NPD_Sets | ID-denovo-nonsyn | 6925   | TCF4     |
| NPD_Sets | ID-denovo-nonsyn | 119467 | CLRN3    |
| NPD_Sets | ID-denovo-nonsyn | 155054 | ZNF425   |
| NPD_Sets | ID-denovo-nonsyn | 9724   | UTP14C   |
| NPD_Sets | ID-denovo-nonsyn | 10753  | CAPN9    |
| NPD_Sets | ID-denovo-nonsyn | 4750   | NEK1     |
| NPD_Sets | ID-denovo-nonsyn | 1917   | EEF1A2   |
| NPD_Sets | ID-denovo-nonsyn | 1106   | CHD2     |
| NPD_Sets | ID-denovo-nonsyn | 342574 | KRT27    |
| NPD_Sets | ID-denovo-nonsyn | 26523  | AGO1     |
| NPD_Sets | ID-denovo-nonsyn | 29083  | GTPBP8   |
| NPD_Sets | ID-denovo-nonsyn | 23316  | CUX2     |
| NPD_Sets | ID-denovo-nonsyn | 1499   | CTNNB1   |
| NPD_Sets | ID-denovo-nonsyn | 3786   | KCNQ3    |
| NPD_Sets | ID-denovo-nonsyn | 26985  | AP3M1    |
| NPD_Sets | ID-denovo-nonsyn | 2889   | RAPGEF1  |
| NPD_Sets | ID-denovo-nonsyn | 51429  | SNX9     |
| NPD_Sets | ID-denovo-nonsyn | 30000  | TNPO2    |
| NPD_Sets | ID-denovo-nonsyn | 23348  | DOCK9    |
| NPD_Sets | ID-denovo-nonsyn | 83992  | CTTNBP2  |
| NPD_Sets | ID-denovo-nonsyn | 10087  | COL4A3BP |
| NPD_Sets | ID-denovo-nonsyn | 53831  | GPR84    |
| NPD_Sets | ID-denovo-nonsyn | 85462  | FHDC1    |
| NPD_Sets | ID-denovo-nonsyn | 55230  | USP40    |
| NPD_Sets | ID-denovo-nonsyn | 4238   | MFAP3    |
| NPD_Sets | ID-denovo-nonsyn | 3097   | HIVEP2   |
| NPD_Sets | ID-denovo-nonsyn | 9737   | GPRASP1  |
| NPD_Sets | ID-denovo-nonsyn | 8831   | SYNGAP1  |
| NPD_Sets | ID-denovo-nonsyn | 114883 | OSBPL9   |
| NPD_Sets | ID-denovo-nonsyn | 5925   | RB1      |
| NPD_Sets | ID-denovo-nonsyn | 2890   | GRIA1    |
| NPD_Sets | ID-denovo-nonsyn | 23028  | KDM1A    |
| NPD_Sets | ID-denovo-nonsyn | 221656 | KDM1B    |
| NPD_Sets | ID-denovo-nonsyn | 123207 | C15orf40 |
| NPD_Sets | ID-denovo-nonsyn | 4627   | MYH9     |
| NPD_Sets | ID-denovo-nonsyn | 6529   | SLC6A1   |
| NPD_Sets | ID-denovo-nonsyn | 8503   | PIK3R3   |
| NPD_Sets | ID-denovo-nonsyn | 222    | ALDH3B2  |
| NPD_Sets | ID-denovo-nonsyn | 1742   | DLG4     |
| NPD_Sets | ID-denovo-nonsyn | 818    | CAMK2G   |

|          |                  |        |               |
|----------|------------------|--------|---------------|
| NPD_Sets | ID-denovo-nonsyn | 440854 | CAPN14        |
| NPD_Sets | ID-denovo-nonsyn | 9765   | ZFYVE16       |
| NPD_Sets | ID-denovo-nonsyn | 6535   | SLC6A8        |
| NPD_Sets | ID-denovo-nonsyn | 8546   | AP3B1         |
| NPD_Sets | ID-denovo-nonsyn | 57489  | ODF2L         |
| NPD_Sets | ID-denovo-nonsyn | 26040  | SETBP1        |
| NPD_Sets | ID-denovo-nonsyn | 5528   | PPP2R5D       |
| NPD_Sets | ID-denovo-nonsyn | 80210  | ARMC9         |
| NPD_Sets | ID-denovo-nonsyn | 7991   | TUSC3         |
| NPD_Sets | ID-denovo-nonsyn | 80071  | CCDC15        |
| NPD_Sets | ID-denovo-nonsyn | 26115  | TANC2         |
| NPD_Sets | ID-denovo-nonsyn | 3756   | KCNH1         |
| NPD_Sets | ID-denovo-nonsyn | 8681   | JMJD7-PLA2G4B |
| NPD_Sets | ID-denovo-nonsyn | 2888   | GRB14         |
| NPD_Sets | ID-denovo-nonsyn | 163255 | ZNF540        |
| NPD_Sets | ID-denovo-nonsyn | 285093 | CXXC11        |
| NPD_Sets | ID-denovo-nonsyn | 115019 | SLC26A9       |
| NPD_Sets | ID-denovo-nonsyn | 4520   | MTF1          |
| NPD_Sets | ID-denovo-nonsyn | 5934   | RBL2          |
| NPD_Sets | ID-denovo-nonsyn | 64901  | RANBP17       |
| NPD_Sets | ID-denovo-nonsyn | 9204   | ZMYM6         |
| NPD_Sets | ID-denovo-nonsyn | 7343   | UBTF          |
| NPD_Sets | ID-denovo-nonsyn | 9585   | KIF20B        |
| NPD_Sets | ID-denovo-nonsyn | 10188  | TNK2          |
| NPD_Sets | ID-denovo-nonsyn | 84217  | ZMYND12       |
| NPD_Sets | ID-denovo-nonsyn | 390168 | OR5M1         |
| NPD_Sets | ID-denovo-nonsyn | 79868  | ALG13         |
| NPD_Sets | ID-denovo-nonsyn | 57534  | MIB1          |
| NPD_Sets | ID-denovo-nonsyn | 4143   | MAT1A         |
| NPD_Sets | ID-denovo-nonsyn | 55870  | ASH1L         |
| NPD_Sets | ID-denovo-nonsyn | 283571 | PROX2         |
| NPD_Sets | ID-denovo-nonsyn | 26074  | C20orf26      |
| NPD_Sets | ID-denovo-nonsyn | 80351  | TNKS2         |
| NPD_Sets | ID-denovo-nonsyn | 25820  | ARIH1         |
| NPD_Sets | ID-denovo-nonsyn | 50863  | NTM           |
| NPD_Sets | ID-denovo-nonsyn | 375612 | LHFPL3        |
| NPD_Sets | ID-denovo-nonsyn | 2903   | GRIN2A        |
| NPD_Sets | ID-denovo-nonsyn | 51322  | WAC           |
| NPD_Sets | ID-denovo-nonsyn | 3882   | KRT32         |
| NPD_Sets | ID-denovo-nonsyn | 2904   | GRIN2B        |
| NPD_Sets | miR-137          | 64137  | ABCG4         |
| NPD_Sets | miR-137          | 84945  | ABHD13        |
| NPD_Sets | miR-137          | 11057  | ABHD2         |
| NPD_Sets | miR-137          | 57406  | ABHD6         |
| NPD_Sets | miR-137          | 107    | ADCY1         |
| NPD_Sets | miR-137          | 108    | ADCY2         |
| NPD_Sets | miR-137          | 84890  | ADO           |
| NPD_Sets | miR-137          | 153    | ADRB1         |
| NPD_Sets | miR-137          | 56894  | AGPAT3        |
| NPD_Sets | miR-137          | 23382  | AHCYL2        |
| NPD_Sets | miR-137          | 84883  | AIFM2         |
| NPD_Sets | miR-137          | 11217  | AKAP2         |
| NPD_Sets | miR-137          | 208    | AKT2          |
| NPD_Sets | miR-137          | 8854   | ALDH1A2       |
| NPD_Sets | miR-137          | 57538  | ALPK3         |
| NPD_Sets | miR-137          | 23452  | ANGPTL2       |
| NPD_Sets | miR-137          | 23253  | ANKRD12       |
| NPD_Sets | miR-137          | 23243  | ANKRD28       |

|          |         |        |           |
|----------|---------|--------|-----------|
| NPD_Sets | miR-137 | 91526  | ANKRD44   |
| NPD_Sets | miR-137 | 283373 | ANKRD52   |
| NPD_Sets | miR-137 | 57719  | ANO8      |
| NPD_Sets | miR-137 | 130340 | AP1S3     |
| NPD_Sets | miR-137 | 359    | AQP2      |
| NPD_Sets | miR-137 | 143872 | ARHGAP42  |
| NPD_Sets | miR-137 | 9912   | ARHGAP44  |
| NPD_Sets | miR-137 | 394    | ARHGAP5   |
| NPD_Sets | miR-137 | 23370  | ARHGEF18  |
| NPD_Sets | miR-137 | 55156  | ARMC1     |
| NPD_Sets | miR-137 | 444    | ASPH      |
| NPD_Sets | miR-137 | 22863  | ATG14     |
| NPD_Sets | miR-137 | 23250  | ATP11A    |
| NPD_Sets | miR-137 | 64756  | ATPAF1    |
| NPD_Sets | miR-137 | 342371 | ATXN1L    |
| NPD_Sets | miR-137 | 8707   | B3GALT2   |
| NPD_Sets | miR-137 | 9334   | B4GALT5   |
| NPD_Sets | miR-137 | 10018  | BCL2L11   |
| NPD_Sets | miR-137 | 63035  | BCORL1    |
| NPD_Sets | miR-137 | 8927   | BSN       |
| NPD_Sets | miR-137 | 399947 | C11orf87  |
| NPD_Sets | miR-137 | 147339 | C18orf25  |
| NPD_Sets | miR-137 | 54149  | C21orf91  |
| NPD_Sets | miR-137 | 126567 | C2CD4C    |
| NPD_Sets | miR-137 | 766    | CA7       |
| NPD_Sets | miR-137 | 775    | CACNA1C   |
| NPD_Sets | miR-137 | 8912   | CACNA1H   |
| NPD_Sets | miR-137 | 8911   | CACNA1I   |
| NPD_Sets | miR-137 | 93664  | CADPS2    |
| NPD_Sets | miR-137 | 808    | CALM3     |
| NPD_Sets | miR-137 | 83698  | CALN1     |
| NPD_Sets | miR-137 | 815    | CAMK2A    |
| NPD_Sets | miR-137 | 10645  | CAMKK2    |
| NPD_Sets | miR-137 | 154467 | CCDC167   |
| NPD_Sets | miR-137 | 317762 | CCDC85C   |
| NPD_Sets | miR-137 | 901    | CCNG2     |
| NPD_Sets | miR-137 | 23607  | CD2AP     |
| NPD_Sets | miR-137 | 8476   | CDC42BPA  |
| NPD_Sets | miR-137 | 10435  | CDC42EP2  |
| NPD_Sets | miR-137 | 55536  | CDCA7L    |
| NPD_Sets | miR-137 | 80205  | CHD9      |
| NPD_Sets | miR-137 | 1113   | CHGA      |
| NPD_Sets | miR-137 | 1121   | CHM       |
| NPD_Sets | miR-137 | 23122  | CLASP2    |
| NPD_Sets | miR-137 | 23274  | CLEC16A   |
| NPD_Sets | miR-137 | 246175 | CNOT6L    |
| NPD_Sets | miR-137 | 1310   | COL19A1   |
| NPD_Sets | miR-137 | 1289   | COL5A1    |
| NPD_Sets | miR-137 | 9318   | COPS2     |
| NPD_Sets | miR-137 | 9586   | CREB5     |
| NPD_Sets | miR-137 | 1399   | CRKL      |
| NPD_Sets | miR-137 | 27254  | CSDC2     |
| NPD_Sets | miR-137 | 64478  | CSMD1     |
| NPD_Sets | miR-137 | 10106  | CTDSP2    |
| NPD_Sets | miR-137 | 83992  | CTTNBP2   |
| NPD_Sets | miR-137 | 55917  | CTTNBP2NL |
| NPD_Sets | miR-137 | 8452   | CUL3      |
| NPD_Sets | miR-137 | 1523   | CUX1      |



|          |         |        |         |
|----------|---------|--------|---------|
| NPD_Sets | miR-137 | 1525   | CXADR   |
| NPD_Sets | miR-137 | 6387   | CXCL12  |
| NPD_Sets | miR-137 | 116159 | CYYR1   |
| NPD_Sets | miR-137 | 50717  | DCAF8   |
| NPD_Sets | miR-137 | 51473  | DCDC2   |
| NPD_Sets | miR-137 | 166614 | DCLK2   |
| NPD_Sets | miR-137 | 163486 | DENND1B |
| NPD_Sets | miR-137 | 9909   | DENND4B |
| NPD_Sets | miR-137 | 148252 | DIRAS1  |
| NPD_Sets | miR-137 | 54769  | DIRAS2  |
| NPD_Sets | miR-137 | 54788  | DNAJB12 |
| NPD_Sets | miR-137 | 220164 | DOK6    |
| NPD_Sets | miR-137 | 1832   | DSP     |
| NPD_Sets | miR-137 | 25778  | DSTYK   |
| NPD_Sets | miR-137 | 113878 | DTX2    |
| NPD_Sets | miR-137 | 1846   | DUSP4   |
| NPD_Sets | miR-137 | 1847   | DUSP5   |
| NPD_Sets | miR-137 | 1943   | EFNA2   |
| NPD_Sets | miR-137 | 23167  | EFR3A   |
| NPD_Sets | miR-137 | 1995   | ELAVL3  |
| NPD_Sets | miR-137 | 114794 | ELFN2   |
| NPD_Sets | miR-137 | 256364 | EML3    |
| NPD_Sets | miR-137 | 2020   | EN2     |
| NPD_Sets | miR-137 | 2045   | EPHA7   |
| NPD_Sets | miR-137 | 2046   | EPHA8   |
| NPD_Sets | miR-137 | 2059   | EPS8    |
| NPD_Sets | miR-137 | 2101   | ESRRA   |
| NPD_Sets | miR-137 | 2104   | ESRRG   |
| NPD_Sets | miR-137 | 150864 | FAM117B |
| NPD_Sets | miR-137 | 285172 | FAM126B |
| NPD_Sets | miR-137 | 162427 | FAM134C |
| NPD_Sets | miR-137 | 51059  | FAM135B |
| NPD_Sets | miR-137 | 56975  | FAM20C  |
| NPD_Sets | miR-137 | 143684 | FAM76B  |
| NPD_Sets | miR-137 | 286336 | FAM78A  |
| NPD_Sets | miR-137 | 151354 | FAM84A  |
| NPD_Sets | miR-137 | 120114 | FAT3    |
| NPD_Sets | miR-137 | 114907 | FBXO32  |
| NPD_Sets | miR-137 | 121512 | FGD4    |
| NPD_Sets | miR-137 | 2256   | FGF11   |
| NPD_Sets | miR-137 | 2275   | FHL3    |
| NPD_Sets | miR-137 | 2288   | FKBP4   |
| NPD_Sets | miR-137 | 252995 | FNDC5   |
| NPD_Sets | miR-137 | 96459  | FNIP1   |
| NPD_Sets | miR-137 | 1112   | FOXN3   |
| NPD_Sets | miR-137 | 10818  | FRS2    |
| NPD_Sets | miR-137 | 5045   | FURIN   |
| NPD_Sets | miR-137 | 9568   | GABBR2  |
| NPD_Sets | miR-137 | 2554   | GABRA1  |
| NPD_Sets | miR-137 | 2589   | GALNT1  |
| NPD_Sets | miR-137 | 8139   | GAN     |
| NPD_Sets | miR-137 | 64599  | GIGYF1  |
| NPD_Sets | miR-137 | 26035  | GLCE    |
| NPD_Sets | miR-137 | 84662  | GLIS2   |
| NPD_Sets | miR-137 | 10672  | GNA13   |
| NPD_Sets | miR-137 | 2779   | GNAT1   |
| NPD_Sets | miR-137 | 2802   | GOLGA3  |
| NPD_Sets | miR-137 | 26003  | GORASP2 |

|          |         |        |          |
|----------|---------|--------|----------|
| NPD_Sets | miR-137 | 23131  | GPATCH8  |
| NPD_Sets | miR-137 | 56261  | GPCPD1   |
| NPD_Sets | miR-137 | 160897 | GPR180   |
| NPD_Sets | miR-137 | 2849   | GPR26    |
| NPD_Sets | miR-137 | 65983  | GRAMD3   |
| NPD_Sets | miR-137 | 23151  | GRAMD4   |
| NPD_Sets | miR-137 | 2890   | GRIA1    |
| NPD_Sets | miR-137 | 2893   | GRIA4    |
| NPD_Sets | miR-137 | 2932   | GSK3B    |
| NPD_Sets | miR-137 | 2977   | GUCY1A2  |
| NPD_Sets | miR-137 | 283464 | GXYLT1   |
| NPD_Sets | miR-137 | 3021   | H3F3B    |
| NPD_Sets | miR-137 | 610    | HCN2     |
| NPD_Sets | miR-137 | 139324 | HDX      |
| NPD_Sets | miR-137 | 57493  | HEG1     |
| NPD_Sets | miR-137 | 8916   | HERC3    |
| NPD_Sets | miR-137 | 3090   | HIC1     |
| NPD_Sets | miR-137 | 28996  | HIPK2    |
| NPD_Sets | miR-137 | 3101   | HK3      |
| NPD_Sets | miR-137 | 3131   | HLF      |
| NPD_Sets | miR-137 | 6596   | HLTF     |
| NPD_Sets | miR-137 | 220988 | HNRNPA3  |
| NPD_Sets | miR-137 | 3192   | HNRNPU   |
| NPD_Sets | miR-137 | 3224   | HOXC8    |
| NPD_Sets | miR-137 | 3358   | HTR2C    |
| NPD_Sets | miR-137 | 3416   | IDE      |
| NPD_Sets | miR-137 | 3417   | IDH1     |
| NPD_Sets | miR-137 | 64375  | IKZF4    |
| NPD_Sets | miR-137 | 3613   | IMPA2    |
| NPD_Sets | miR-137 | 3632   | INPP5A   |
| NPD_Sets | miR-137 | 8660   | IRS2     |
| NPD_Sets | miR-137 | 145501 | ISM2     |
| NPD_Sets | miR-137 | 80853  | JHDM1D   |
| NPD_Sets | miR-137 | 3736   | KCNA1    |
| NPD_Sets | miR-137 | 3756   | KCNH1    |
| NPD_Sets | miR-137 | 3760   | KCNJ3    |
| NPD_Sets | miR-137 | 10242  | KCNMB2   |
| NPD_Sets | miR-137 | 115207 | KCTD12   |
| NPD_Sets | miR-137 | 9682   | KDM4A    |
| NPD_Sets | miR-137 | 10765  | KDM5B    |
| NPD_Sets | miR-137 | 22889  | KIAA0907 |
| NPD_Sets | miR-137 | 85379  | KIAA1671 |
| NPD_Sets | miR-137 | 3815   | KIT      |
| NPD_Sets | miR-137 | 8462   | KLF11    |
| NPD_Sets | miR-137 | 11278  | KLF12    |
| NPD_Sets | miR-137 | 81606  | LBH      |
| NPD_Sets | miR-137 | 203190 | LGI3     |
| NPD_Sets | miR-137 | 10184  | LHFPL2   |
| NPD_Sets | miR-137 | 22998  | LIMCH1   |
| NPD_Sets | miR-137 | 22853  | LMTK2    |
| NPD_Sets | miR-137 | 23143  | LRCH1    |
| NPD_Sets | miR-137 | 390205 | LRRC10B  |
| NPD_Sets | miR-137 | 55222  | LRRC20   |
| NPD_Sets | miR-137 | 64101  | LRRC4    |
| NPD_Sets | miR-137 | 338645 | LUZP2    |
| NPD_Sets | miR-137 | 4094   | MAF      |
| NPD_Sets | miR-137 | 9794   | MAML1    |
| NPD_Sets | miR-137 | 6416   | MAP2K4   |

|          |         |        |             |
|----------|---------|--------|-------------|
| NPD_Sets | miR-137 | 9175   | MAP3K13     |
| NPD_Sets | miR-137 | 5871   | MAP4K2      |
| NPD_Sets | miR-137 | 5602   | MAPK10      |
| NPD_Sets | miR-137 | 9261   | MAPKAPK2    |
| NPD_Sets | miR-137 | 64844  | MARCH7      |
| NPD_Sets | miR-137 | 8932   | MBD2        |
| NPD_Sets | miR-137 | 129642 | MBOAT2      |
| NPD_Sets | miR-137 | 51360  | MBTPS2      |
| NPD_Sets | miR-137 | 51108  | METTL9      |
| NPD_Sets | miR-137 | 11343  | MGLL        |
| NPD_Sets | miR-137 | 375056 | MIA3        |
| NPD_Sets | miR-137 | 166968 | MIER3       |
| NPD_Sets | miR-137 | 4286   | MITF        |
| NPD_Sets | miR-137 | 23609  | MKRN2       |
| NPD_Sets | miR-137 | 4354   | MPP1        |
| NPD_Sets | miR-137 | 4440   | MSI1        |
| NPD_Sets | miR-137 | 253827 | MSRB3       |
| NPD_Sets | miR-137 | 92140  | MTDH        |
| NPD_Sets | miR-137 | 4520   | MTF1        |
| NPD_Sets | miR-137 | 4084   | MXD1        |
| NPD_Sets | miR-137 | 4642   | MYO1D       |
| NPD_Sets | miR-137 | 4665   | NAB2        |
| NPD_Sets | miR-137 | 138151 | NACC2       |
| NPD_Sets | miR-137 | 339983 | NAT8L       |
| NPD_Sets | miR-137 | 8648   | NCOA1       |
| NPD_Sets | miR-137 | 8202   | NCOA3       |
| NPD_Sets | miR-137 | 63941  | NECAB3      |
| NPD_Sets | miR-137 | 4747   | NEFL        |
| NPD_Sets | miR-137 | 81832  | NETO1       |
| NPD_Sets | miR-137 | 4761   | NEUROD2     |
| NPD_Sets | miR-137 | 58158  | NEUROD4     |
| NPD_Sets | miR-137 | 4763   | NF1         |
| NPD_Sets | miR-137 | 23114  | NFASC       |
| NPD_Sets | miR-137 | 4772   | NFATC1      |
| NPD_Sets | miR-137 | 4781   | NFIB        |
| NPD_Sets | miR-137 | 4801   | NFYB        |
| NPD_Sets | miR-137 | 25836  | NIPBL       |
| NPD_Sets | miR-137 | 284353 | NKPD1       |
| NPD_Sets | miR-137 | 4851   | NOTCH1      |
| NPD_Sets | miR-137 | 4864   | NPC1        |
| NPD_Sets | miR-137 | 9542   | NRG2        |
| NPD_Sets | miR-137 | 4905   | NSF         |
| NPD_Sets | miR-137 | 23386  | NUDCD3      |
| NPD_Sets | miR-137 | 55916  | NXT2        |
| NPD_Sets | miR-137 | 23762  | OSBP2       |
| NPD_Sets | miR-137 | 56957  | OTUD7B      |
| NPD_Sets | miR-137 | 10605  | PAIP1       |
| NPD_Sets | miR-137 | 445815 | PALM2-AKAP2 |
| NPD_Sets | miR-137 | 11044  | PAPD7       |
| NPD_Sets | miR-137 | 79668  | PARP8       |
| NPD_Sets | miR-137 | 115294 | PCMTD1      |
| NPD_Sets | miR-137 | 10015  | PDCD6IP     |
| NPD_Sets | miR-137 | 10846  | PDE10A      |
| NPD_Sets | miR-137 | 5141   | PDE4A       |
| NPD_Sets | miR-137 | 23244  | PDS5A       |
| NPD_Sets | miR-137 | 23037  | PDZD2       |
| NPD_Sets | miR-137 | 8504   | PEX3        |
| NPD_Sets | miR-137 | 5210   | PFKFB4      |

|          |         |        |          |
|----------|---------|--------|----------|
| NPD_Sets | miR-137 | 79960  | PHF17    |
| NPD_Sets | miR-137 | 90102  | PHLDB2   |
| NPD_Sets | miR-137 | 8503   | PIK3R3   |
| NPD_Sets | miR-137 | 79837  | PIP4K2C  |
| NPD_Sets | miR-137 | 5306   | PITPNA   |
| NPD_Sets | miR-137 | 57605  | PITPNM2  |
| NPD_Sets | miR-137 | 23659  | PLA2G15  |
| NPD_Sets | miR-137 | 55041  | PLEKHB2  |
| NPD_Sets | miR-137 | 26030  | PLEKHG3  |
| NPD_Sets | miR-137 | 80301  | PLEKHO2  |
| NPD_Sets | miR-137 | 56937  | PMEPA1   |
| NPD_Sets | miR-137 | 5432   | POLR2C   |
| NPD_Sets | miR-137 | 10891  | PPARGC1A |
| NPD_Sets | miR-137 | 133522 | PPARGC1B |
| NPD_Sets | miR-137 | 22843  | PPM1E    |
| NPD_Sets | miR-137 | 5500   | PPP1CB   |
| NPD_Sets | miR-137 | 26051  | PPP1R16B |
| NPD_Sets | miR-137 | 55607  | PPP1R9A  |
| NPD_Sets | miR-137 | 9701   | PPP6R2   |
| NPD_Sets | miR-137 | 84279  | PRADC1   |
| NPD_Sets | miR-137 | 63976  | PRDM16   |
| NPD_Sets | miR-137 | 5562   | PRKAA1   |
| NPD_Sets | miR-137 | 5564   | PRKAB1   |
| NPD_Sets | miR-137 | 5577   | PRKAR2B  |
| NPD_Sets | miR-137 | 51334  | PRR16    |
| NPD_Sets | miR-137 | 5738   | PTGFRN   |
| NPD_Sets | miR-137 | 11156  | PTP4A3   |
| NPD_Sets | miR-137 | 5784   | PTPN14   |
| NPD_Sets | miR-137 | 84867  | PTPN5    |
| NPD_Sets | miR-137 | 5829   | PXN      |
| NPD_Sets | miR-137 | 9444   | QKI      |
| NPD_Sets | miR-137 | 9771   | RAPGEF5  |
| NPD_Sets | miR-137 | 65059  | RAPH1    |
| NPD_Sets | miR-137 | 11228  | RASSF8   |
| NPD_Sets | miR-137 | 55225  | RAVER2   |
| NPD_Sets | miR-137 | 55285  | RBM41    |
| NPD_Sets | miR-137 | 283248 | RCOR2    |
| NPD_Sets | miR-137 | 57455  | REXO1    |
| NPD_Sets | miR-137 | 23180  | RFTN1    |
| NPD_Sets | miR-137 | 9628   | RGS6     |
| NPD_Sets | miR-137 | 55188  | RIC8B    |
| NPD_Sets | miR-137 | 253260 | RICTOR   |
| NPD_Sets | miR-137 | 57494  | RIMKLB   |
| NPD_Sets | miR-137 | 140730 | RIMS4    |
| NPD_Sets | miR-137 | 64795  | RMND5A   |
| NPD_Sets | miR-137 | 50862  | RNF141   |
| NPD_Sets | miR-137 | 57484  | RNF150   |
| NPD_Sets | miR-137 | 285671 | RNF180   |
| NPD_Sets | miR-137 | 80352  | RNF39    |
| NPD_Sets | miR-137 | 6047   | RNF4     |
| NPD_Sets | miR-137 | 6095   | RORA     |
| NPD_Sets | miR-137 | 6138   | RPL15    |
| NPD_Sets | miR-137 | 6158   | RPL28    |
| NPD_Sets | miR-137 | 58528  | RRAGD    |
| NPD_Sets | miR-137 | 6239   | RREB1    |
| NPD_Sets | miR-137 | 6263   | RYR3     |
| NPD_Sets | miR-137 | 51128  | SAR1B    |
| NPD_Sets | miR-137 | 388228 | SBK1     |

|          |         |        |          |
|----------|---------|--------|----------|
| NPD_Sets | miR-137 | 55206  | SBNO1    |
| NPD_Sets | miR-137 | 83482  | SCRT1    |
| NPD_Sets | miR-137 | 85508  | SCRT2    |
| NPD_Sets | miR-137 | 51714  | SELT     |
| NPD_Sets | miR-137 | 55964  | SEPT3    |
| NPD_Sets | miR-137 | 27230  | SERP1    |
| NPD_Sets | miR-137 | 91404  | SESTD1   |
| NPD_Sets | miR-137 | 23067  | SETD1B   |
| NPD_Sets | miR-137 | 57713  | SFMBT2   |
| NPD_Sets | miR-137 | 6445   | SGCG     |
| NPD_Sets | miR-137 | 8879   | SGPL1    |
| NPD_Sets | miR-137 | 54557  | SGTB     |
| NPD_Sets | miR-137 | 53358  | SHC3     |
| NPD_Sets | miR-137 | 729993 | SHISA9   |
| NPD_Sets | miR-137 | 357    | SHROOM2  |
| NPD_Sets | miR-137 | 150094 | SIK1     |
| NPD_Sets | miR-137 | 57568  | SIPA1L2  |
| NPD_Sets | miR-137 | 6497   | SKI      |
| NPD_Sets | miR-137 | 6558   | SLC12A2  |
| NPD_Sets | miR-137 | 57468  | SLC12A5  |
| NPD_Sets | miR-137 | 63027  | SLC22A23 |
| NPD_Sets | miR-137 | 25769  | SLC24A2  |
| NPD_Sets | miR-137 | 7782   | SLC30A4  |
| NPD_Sets | miR-137 | 10559  | SLC35A1  |
| NPD_Sets | miR-137 | 113829 | SLC35A4  |
| NPD_Sets | miR-137 | 9906   | SLC35E2  |
| NPD_Sets | miR-137 | 728661 | SLC35E2B |
| NPD_Sets | miR-137 | 124935 | SLC43A2  |
| NPD_Sets | miR-137 | 85414  | SLC45A3  |
| NPD_Sets | miR-137 | 9497   | SLC4A7   |
| NPD_Sets | miR-137 | 60482  | SLC5A7   |
| NPD_Sets | miR-137 | 6529   | SLC6A1   |
| NPD_Sets | miR-137 | 6535   | SLC6A8   |
| NPD_Sets | miR-137 | 6536   | SLC6A9   |
| NPD_Sets | miR-137 | 6546   | SLC8A1   |
| NPD_Sets | miR-137 | 8467   | SMARCA5  |
| NPD_Sets | miR-137 | 57154  | SMURF1   |
| NPD_Sets | miR-137 | 8303   | SNN      |
| NPD_Sets | miR-137 | 54861  | SNRK     |
| NPD_Sets | miR-137 | 6667   | SP1      |
| NPD_Sets | miR-137 | 56848  | SPHK2    |
| NPD_Sets | miR-137 | 9806   | SPOCK2   |
| NPD_Sets | miR-137 | 144108 | SPTY2D1  |
| NPD_Sets | miR-137 | 6714   | SRC      |
| NPD_Sets | miR-137 | 6431   | SRSF6    |
| NPD_Sets | miR-137 | 23648  | SSBP3    |
| NPD_Sets | miR-137 | 117178 | SSX2IP   |
| NPD_Sets | miR-137 | 6767   | ST13     |
| NPD_Sets | miR-137 | 6487   | ST3GAL3  |
| NPD_Sets | miR-137 | 84620  | ST6GAL2  |
| NPD_Sets | miR-137 | 140901 | STK35    |
| NPD_Sets | miR-137 | 11329  | STK38    |
| NPD_Sets | miR-137 | 83931  | STK40    |
| NPD_Sets | miR-137 | 6801   | STRN     |
| NPD_Sets | miR-137 | 9515   | STXBPL   |
| NPD_Sets | miR-137 | 6815   | STYX     |
| NPD_Sets | miR-137 | 9900   | SV2A     |
| NPD_Sets | miR-137 | 6854   | SYN2     |

|          |         |           |          |
|----------|---------|-----------|----------|
| NPD_Sets | miR-137 | 79953     | SYNDIG1  |
| NPD_Sets | miR-137 | 8867      | SYNJ1    |
| NPD_Sets | miR-137 | 54457     | TAF7L    |
| NPD_Sets | miR-137 | 23216     | TBC1D1   |
| NPD_Sets | miR-137 | 23232     | TBC1D12  |
| NPD_Sets | miR-137 | 6913      | TBX15    |
| NPD_Sets | miR-137 | 6926      | TBX3     |
| NPD_Sets | miR-137 | 6925      | TCF4     |
| NPD_Sets | miR-137 | 7003      | TEAD1    |
| NPD_Sets | miR-137 | 9895      | TECPR2   |
| NPD_Sets | miR-137 | 7020      | TFAP2A   |
| NPD_Sets | miR-137 | 7068      | THRB     |
| NPD_Sets | miR-137 | 7082      | TJP1     |
| NPD_Sets | miR-137 | 50999     | TMED5    |
| NPD_Sets | miR-137 | 114795    | TMEM132B |
| NPD_Sets | miR-137 | 100113407 | TMEM170B |
| NPD_Sets | miR-137 | 202915    | TMEM184A |
| NPD_Sets | miR-137 | 161145    | TMEM229B |
| NPD_Sets | miR-137 | 55161     | TMEM33   |
| NPD_Sets | miR-137 | 148534    | TMEM56   |
| NPD_Sets | miR-137 | 81542     | TMX1     |
| NPD_Sets | miR-137 | 23112     | TNRC6B   |
| NPD_Sets | miR-137 | 27348     | TOR1B    |
| NPD_Sets | miR-137 | 53373     | TPCN1    |
| NPD_Sets | miR-137 | 9697      | TRAM2    |
| NPD_Sets | miR-137 | 7222      | TRPC3    |
| NPD_Sets | miR-137 | 7257      | TSNAX    |
| NPD_Sets | miR-137 | 340348    | TSPAN33  |
| NPD_Sets | miR-137 | 23331     | TTC28    |
| NPD_Sets | miR-137 | 23508     | TTC9     |
| NPD_Sets | miR-137 | 56995     | TULP4    |
| NPD_Sets | miR-137 | 7326      | UBE2G1   |
| NPD_Sets | miR-137 | 55284     | UBE2W    |
| NPD_Sets | miR-137 | 65264     | UBE2Z    |
| NPD_Sets | miR-137 | 254048    | UBN2     |
| NPD_Sets | miR-137 | 92181     | UBTD2    |
| NPD_Sets | miR-137 | 9706      | ULK2     |
| NPD_Sets | miR-137 | 57646     | USP28    |
| NPD_Sets | miR-137 | 84749     | USP30    |
| NPD_Sets | miR-137 | 79805     | VASH2    |
| NPD_Sets | miR-137 | 79001     | VKORC1   |
| NPD_Sets | miR-137 | 90113     | VWA5B2   |
| NPD_Sets | miR-137 | 23286     | WWC1     |
| NPD_Sets | miR-137 | 11060     | WWP2     |
| NPD_Sets | miR-137 | 64328     | XPO4     |
| NPD_Sets | miR-137 | 54464     | XRN1     |
| NPD_Sets | miR-137 | 91746     | YTHDC1   |
| NPD_Sets | miR-137 | 51776     | ZAK      |
| NPD_Sets | miR-137 | 51341     | ZBTB7A   |
| NPD_Sets | miR-137 | 51043     | ZBTB7B   |
| NPD_Sets | miR-137 | 23144     | ZC3H3    |
| NPD_Sets | miR-137 | 340481    | ZDHHC21  |
| NPD_Sets | miR-137 | 51304     | ZDHHC3   |
| NPD_Sets | miR-137 | 678       | ZFP36L2  |
| NPD_Sets | miR-137 | 9765      | ZFYVE16  |
| NPD_Sets | miR-137 | 7750      | ZMYM2    |
| NPD_Sets | miR-137 | 7707      | ZNF148   |
| NPD_Sets | miR-137 | 25946     | ZNF385A  |

|          |         |        |        |
|----------|---------|--------|--------|
| NPD_Sets | miR-137 | 203523 | ZNF449 |
| NPD_Sets | miR-137 | 55279  | ZNF654 |
| NPD_Sets | miR-137 | 374655 | ZNF710 |
| NPD_Sets | miR-137 | 7629   | ZNF76  |
| NPD_Sets | mGluR5  | 989    | SEPT7  |
| NPD_Sets | mGluR5  | 9456   | HOMER1 |
| NPD_Sets | mGluR5  | 1785   | DNM2   |
| NPD_Sets | mGluR5  | 11346  | SYNPO  |
| NPD_Sets | mGluR5  | 55690  | PACS1  |
| NPD_Sets | mGluR5  | 230    | ALDOC  |
| NPD_Sets | mGluR5  | 490    | ATP2B1 |
| NPD_Sets | mGluR5  | 118    | ADD1   |
| NPD_Sets | mGluR5  | 8867   | SYNJ1  |
| NPD_Sets | mGluR5  | 11034  | DSTN   |
| NPD_Sets | mGluR5  | 5413   | SEPT5  |
| NPD_Sets | mGluR5  | 119    | ADD2   |
| NPD_Sets | mGluR5  | 11113  | CIT    |
| NPD_Sets | mGluR5  | 4905   | NSF    |
| NPD_Sets | mGluR5  | 8927   | BSN    |
| NPD_Sets | mGluR5  | 2664   | GDI1   |
| NPD_Sets | mGluR5  | 1759   | DNM1   |
| NPD_Sets | mGluR5  | 5864   | RAB3A  |
| NPD_Sets | mGluR5  | 163    | AP2B1  |
| NPD_Sets | mGluR5  | 3897   | L1CAM  |
| NPD_Sets | mGluR5  | 7533   | YWHAH  |
| NPD_Sets | mGluR5  | 7532   | YWHAG  |
| NPD_Sets | mGluR5  | 1213   | CLTC   |
| NPD_Sets | mGluR5  | 10971  | YWHAQ  |
| NPD_Sets | mGluR5  | 50944  | SHANK1 |
| NPD_Sets | mGluR5  | 2775   | GNAO1  |
| NPD_Sets | mGluR5  | 7534   | YWHAZ  |
| NPD_Sets | mGluR5  | 226    | ALDOA  |
| NPD_Sets | mGluR5  | 481    | ATP1B1 |
| NPD_Sets | mGluR5  | 23236  | PLCB1  |
| NPD_Sets | mGluR5  | 7529   | YWHAB  |
| NPD_Sets | mGluR5  | 4130   | MAP1A  |
| NPD_Sets | mGluR5  | 4131   | MAP1B  |
| NPD_Sets | mGluR5  | 4133   | MAP2   |
| NPD_Sets | mGluR5  | 476    | ATP1A1 |
| NPD_Sets | mGluR5  | 477    | ATP1A2 |
| NPD_Sets | mGluR5  | 478    | ATP1A3 |
| NPD_Sets | mGluR5  | 22895  | RPH3A  |

SI Table 3. Cell line description and available clinical information for all experiments.

| Pilot | Phase 1 Plate Number | Phase 2 Plate Number | RNAseq (loaxpine or methylparaben) | Cell Type | Cohort | Source  | Patient ID | Somatic Cell | Reprogramming Method     | NPC Differentiation | NPC Line ID for L1000         | NPC Passage | L1000 Phase | NPC Line IDs for loaxpine RNAseq | NPC Line IDs for methylparaben RNAseq | Sex | Dx                                       | Ethnicity                     | Age of Onset | IQ      | Developmental History | Clozapine Response | Family History | SZ-related CNV Burden |   |
|-------|----------------------|----------------------|------------------------------------|-----------|--------|---------|------------|--------------|--------------------------|---------------------|-------------------------------|-------------|-------------|----------------------------------|---------------------------------------|-----|------------------------------------------|-------------------------------|--------------|---------|-----------------------|--------------------|----------------|-----------------------|---|
| na    | 1                    | 1                    | na                                 | hiPSC NPC | S21    | ATCC    | CNTL-2322  | fibroblast   | tet-inducible lentivirus | EB                  | B0-2-E (1), B0-2-A (2)        | p7-g10      | 1 & 2       | na                               | na                                    | M   | Control                                  | Caucasian                     | n/a          | unknown | unknown               | unknown            | unknown        | -                     |   |
| na    | 3                    | 1                    | na                                 | hiPSC NPC | S21    | Coriell | GM03440    | fibroblast   | tet-inducible lentivirus | EB                  | 3440-S-A                      | p7-g10      | 1 & 2       | na                               | na                                    | M   | Control                                  | Caucasian                     | n/a          | unknown | unknown               | unknown            | unknown        | -                     |   |
| na    | 1                    | 2                    | na                                 | hiPSC NPC | S21    | Coriell | GM03651    | fibroblast   | tet-inducible lentivirus | EB                  | 3651-A-A                      | p7-g10      | 1 & 2       | na                               | na                                    | F   | Control                                  | Caucasian                     | n/a          | unknown | unknown               | unknown            | unknown        | -                     |   |
| na    | 4                    | 2                    | na                                 | hiPSC NPC | S21    | Coriell | GM04506    | fibroblast   | tet-inducible lentivirus | EB                  | 4506-B-A                      | p7-g10      | 1 & 2       | na                               | na                                    | F   | Control                                  | Caucasian                     | n/a          | unknown | unknown               | unknown            | unknown        | -                     |   |
| na    | 4                    | na                   | na                                 | hiPSC NPC | S21    | Coriell | AG09119    | fibroblast   | tet-inducible lentivirus | EB                  | 9119-S-A                      | p7-g10      | 1           | na                               | na                                    | F   | Control                                  | Caucasian                     | n/a          | unknown | unknown               | unknown            | unknown        | -                     |   |
| na    | 2                    | 3                    | L                                  | hiPSC NPC | S22    | NIMH    | NS02607    | fibroblast   | sendai virus             | EB + dual-SMAD      | 2607-3-1                      | p5          | 1 & 2       | 2607-3-1, 2607-4-1               | na                                    | M   | Control                                  | Caucasian                     | n/a          | 126     | clean                 | n/a                | -              | -                     |   |
| na    | 3                    | 4                    | LM                                 | hiPSC NPC | S22    | NIMH    | NS03084    | fibroblast   | sendai virus             | EB + dual-SMAD      | 3084-2-2                      | p7          | 1 & 2       | 3084-2-2, 3084-1-1               | na                                    | M   | Control                                  | Black, non-Hispanic           | n/a          | 87      | clean                 | n/a                | -              | -                     |   |
| na    | 1                    | 2                    | na                                 | hiPSC NPC | S22    | NIMH    | NS03113    | fibroblast   | sendai virus             | EB + dual-SMAD      | 3113-6-3                      | p5          | 1 & 2       | na                               | na                                    | F   | Control                                  | Caucasian                     | n/a          | 123     | clean                 | n/a                | -              | -                     |   |
| na    | 1                    | 4                    | M                                  | hiPSC NPC | S22    | NIMH    | NS03121    | fibroblast   | sendai virus             | EB + dual-SMAD      | 3121-3-1                      | p5          | 1 & 2       | na                               | 3121-3-1, 3121-3-2                    | F   | Control                                  | Caucasian                     | n/a          | 134     | clean                 | n/a                | -              | -                     |   |
| na    | na                   | 3                    | M                                  | hiPSC NPC | S22    | NIMH    | NS03182    | fibroblast   | sendai virus             | EB + dual-SMAD      | 3182-2-4                      | p5          | 2           | na                               | 3182-2-4, 3182-3-1                    | F   | Control                                  | Caucasian                     | n/a          | 119     | clean                 | n/a                | -              | -                     |   |
| na    | 4                    | 4                    | na                                 | hiPSC NPC | S22    | NIMH    | NS03234    | fibroblast   | sendai virus             | EB + dual-SMAD      | 3234-2-4                      | p5          | 1 & 2       | na                               | na                                    | M   | Control                                  | Indian                        | n/a          | 94      | clean                 | n/a                | -              | -                     |   |
| na    | 4                    | 3                    | L                                  | hiPSC NPC | S22    | NIMH    | NS0553     | fibroblast   | sendai virus             | EB + dual-SMAD      | 553-3-1                       | p5          | 1 & 2       | 553-3-1, 553-53-C                | na                                    | M   | Control                                  | Caucasian                     | n/a          | 127     | clean                 | n/a                | -              | -                     |   |
| na    | 2                    | 2                    | na                                 | hiPSC NPC | S22    | NIMH    | NS0690     | fibroblast   | sendai virus             | EB + dual-SMAD      | 690-2-1                       | p5          | 1 & 2       | na                               | na                                    | M   | Control                                  | Caucasian                     | n/a          | 115     | clean                 | n/a                | -              | -                     |   |
| na    | 3                    | 1                    | na                                 | hiPSC NPC | S21    | Coriell | GM02038    | fibroblast   | tet-inducible lentivirus | EB                  | 2038-1-A                      | p7-g10      | 1 & 2       | na                               | na                                    | M   | Schizophrenia                            | Caucasian                     | 6            | unknown | unknown               | unknown            | unknown        | -                     |   |
| na    | 3                    | 1                    | na                                 | hiPSC NPC | S21    | Coriell | GM01792    | fibroblast   | tet-inducible lentivirus | EB                  | 1792-1-E                      | p7-g10      | 1 & 2       | na                               | na                                    | M   | Schizophrenia                            | Caucasian Jewish/Scandinavian | unknown      | unknown | unknown               | unknown            | SZ, SA, ASD    | -                     |   |
| 1     | 2                    | 1                    | na                                 | hiPSC NPC | S21    | Coriell | GM01835    | fibroblast   | tet-inducible lentivirus | EB                  | 1835-1-3 (P, 2), 1835-1-5 (1) | p7-g10      | 1 & 2       | na                               | na                                    | F   | Schizo-affective                         | Caucasian Jewish              | unknown      | unknown | unknown               | unknown            | SZ, ASD        | -                     |   |
| na    | 4                    | 2                    | na                                 | hiPSC NPC | S21    | Coriell | GM02097    | fibroblast   | tet-inducible lentivirus | EB                  | 2097-1-C                      | p7-g10      | 1 & 2       | na                               | na                                    | M   | Schizophrenia                            | Caucasian Jewish              | 15           | unknown | unknown               | unknown            | unknown        | SZ, SPD               | - |
| na    | 1                    | na                   | na                                 | hiPSC NPC | S22    | NIMH    | NS01275    | fibroblast   | sendai virus             | EB + dual-SMAD      | 1275-B-3                      | p5          | 1           | na                               | na                                    | F   | COS                                      | Caucasian                     | 10           | 67      | MDD                   | NA                 | SPD            | 22q11.2               |   |
| na    | 1                    | 3                    | M                                  | hiPSC NPC | S22    | NIMH    | NS02011    | fibroblast   | sendai virus             | EB + dual-SMAD      | 2011-3-12                     | p5          | 1 & 2       | na                               | 2011-3-12, 2011-4-4                   | F   | COS                                      | Caucasian                     | 8            | 69      | MDD                   | Y                  | SPD, PPD       | 16p11.2               |   |
| na    | 2                    | 4                    | L                                  | hiPSC NPC | S22    | NIMH    | NS02476    | fibroblast   | sendai virus             | EB + dual-SMAD      | 2476-D1-2                     | p7          | 1 & 2       | 2476-D1-2, 2476-D4-4             | na                                    | F   | COS                                      | Caucasian-Hispanic            | 8            | 82      | clean                 | Y                  | APD            | -                     |   |
| na    | 3                    | 4                    | L                                  | hiPSC NPC | S22    | NIMH    | NS02513    | fibroblast   | sendai virus             | EB + dual-SMAD      | 2513-2-4                      | p5          | 1 & 2       | 2513-2-4, 2513-1-1               | na                                    | M   | COS                                      | Caucasian                     | 4            | 55      | ASD                   | N                  | BD             | -                     |   |
| na    | na                   | 2                    | M                                  | hiPSC NPC | S22    | NIMH    | NS02962    | fibroblast   | sendai virus             | EB + dual-SMAD      | 2962-2-1                      | p5          | 2           | na                               | 2962-2-1, 2962-1-3                    | M   | COS                                      | Caucasian-Hispanic            | 8            | 78      | clean                 | Y                  | SZ/ASD         | -                     |   |
| na    | 4                    | 3                    | na                                 | hiPSC NPC | S22    | NIMH    | NS0499     | fibroblast   | sendai virus             | EB + dual-SMAD      | 499-2-12                      | p5          | 1 & 2       | na                               | na                                    | M   | COS                                      | Caucasian                     | 12           | 84      | clean                 | N                  | SPD            | 3p25.3                |   |
| na    | 3                    | 4                    | na                                 | hiPSC NPC | S22    | NIMH    | NS0581     | fibroblast   | sendai virus             | EB + dual-SMAD      | 581-2-1                       | p5          | 1 & 2       | na                               | na                                    | M   | COS                                      | Caucasian                     | 7            | 74      | MDD                   | N                  | SA             | 2p16.3 del            |   |
| na    | 2                    | 2                    | LM                                 | hiPSC NPC | S22    | NIMH    | NS0676     | fibroblast   | sendai virus             | EB + dual-SMAD      | 676-2-3                       | p5          | 1 & 2       | 676-2-3                          | 676-1-2                               | F   | COS                                      | Caucasian                     | 10           | 79      | MDD                   | N                  | PPD            | 16p11.2               |   |
| na    | 1                    | 3                    | na                                 | hiPSC NPC | S22    | NIMH    | NS02484    | fibroblast   | sendai virus             | EB + dual-SMAD      | 2484-2-A                      | p6          | 1 & 2       | na                               | na                                    | F   | COS                                      | Caucasian                     | 10           | 98      | MDD                   | N                  | PPD            | -                     |   |
| 1     | 1                    | 1                    | na                                 | CCL       | SH-09Y | ATCC    | CRL-2266   | na           | na                       | na                  | na                            | na          | 1 & 2       | na                               | na                                    | F   | neuroblastoma, bone marrow               | unknown                       | unknown      | unknown | unknown               | unknown            | unknown        | -                     |   |
| na    | 1                    | 1                    | na                                 | CCL       | MCF7   | ATCC    | HTB-21     | na           | na                       | na                  | na                            | na          | 1 & 2       | na                               | na                                    | F   | adenocarcinoma, metastatic mammary gland | Caucasian                     | unknown      | unknown | unknown               | unknown            | unknown        | -                     |   |
| na    | 2                    | 2                    | na                                 | CCL       | A673   | ATCC    | CRL-1598   | na           | na                       | na                  | na                            | na          | 1 & 2       | na                               | na                                    | F   | Ewing's sarcoma, muscle                  | unknown                       | unknown      | unknown | unknown               | unknown            | unknown        | -                     |   |
| na    | 2                    | 2                    | na                                 | CCL       | A65    | ATCC    | CRL-1739   | na           | na                       | na                  | na                            | na          | 1 & 2       | na                               | na                                    | F   | gastric adenocarcinoma, stomach          | Caucasian                     | unknown      | unknown | unknown               | unknown            | unknown        | -                     |   |
| 1     | 3                    | 4                    | na                                 | CCL       | A5-49  | ATCC    | CCL-185    | na           | na                       | na                  | na                            | na          | 1 & 2       | na                               | na                                    | M   | carcinoma, lung                          | Caucasian                     | unknown      | unknown | unknown               | unknown            | unknown        | -                     |   |
| na    | 3                    | 4                    | na                                 | CCL       | HepG2  | ATCC    | HB-8065    | na           | na                       | na                  | na                            | na          | 1 & 2       | na                               | na                                    | M   | hepatocellular carcinoma, liver          | Caucasian                     | unknown      | unknown | unknown               | unknown            | unknown        | -                     |   |
| na    | 4                    | 3                    | na                                 | CCL       | VCAP   | ATCC    | CRL-2876   | na           | na                       | na                  | na                            | na          | 1 & 2       | na                               | na                                    | M   | cancer, prostate                         | Caucasian                     | unknown      | unknown | unknown               | unknown            | unknown        | -                     |   |
| na    | 4                    | 3                    | na                                 | CCL       | HT29   | ATCC    | HTB-38     | na           | na                       | na                  | na                            | na          | 1 & 2       | na                               | na                                    | F   | colorectal adenocarcinoma, colon         | Caucasian                     | unknown      | unknown | unknown               | unknown            | unknown        | -                     |   |

Abbreviations: tetracycline (tet), embryoid body (EB), childhood-onset schizophrenia (COS), miscellaneous developmental delay (MDD), autism spectrum disorder (ASD), apparently neurotypical (clean), schizoid personality disorder (SPD), paranoid personality disorder (PPD), bipolar disorder (BD), antisocial personality disorder (APD)



SI Table 4. Drug concentrations used in L1000 screening experiments.

| Pilot                          | Concentration |          | Batch 1                     | Concentration |          | Batch 2                                                           | Concentration |          |
|--------------------------------|---------------|----------|-----------------------------|---------------|----------|-------------------------------------------------------------------|---------------|----------|
|                                | ( $\mu$ M)    | Time (h) |                             | ( $\mu$ M)    | Time (h) |                                                                   | ( $\mu$ M)    | Time (h) |
| Amisulpride (D2R antagonist)   | 0.01, 0.1     | 6, 18    | 3-Acetamidocoumarin         | 10.00         | 6        | 3-Acetamidocoumarin                                               | 0.01          | 6        |
| BAY K8644 (CaV11 agonist)      | 1, 30         | 6, 18    | 4-Hydroxyphenazone          | 10.00         | 6        | Androsterone                                                      | 0.03          | 6        |
| LY341495 (mGluR2/3 antagonist) | 0.01, 0.1     | 6, 18    | Alpha-Ergocryptine          | 7.00          | 6        | Anisomycin (A 00010) 3-Acetoxy-2-(4-Methoxybenzyl)-4-Pyrrolidinol | 0.10          | 6        |
| LY3792628 (mGluR2/3 agonist)   | 0.01, 0.1     | 6, 18    | Amoxapine                   | 0.10          | 6        | Aripiprazole                                                      | 0.03          | 6        |
| MDL 100907 (5HT2A antagonist)  | 0.5, 0.05     | 6, 18    | Anisomycin                  | 10.00         | 6        | Bay K8644 100 Mm                                                  | 1.34          | 6        |
| MK801 (NMDAR antagonist)       | 10, 100       | 6, 18    | Araclidemyltrifluoromethane | 10.00         | 6        | Benzoyloxycarbonyl-L-Glycyl-L-Phenylalanyl-L-Tyrosinebenzyl Ester | 1.00          | 6        |
| NMDA (NMDAR agonist)           | 10, 100       | 6, 18    | Arcaine                     | 10.00         | 6        | Bms-250904                                                        | 0.30          | 6        |
| Nimodipine (CaV1 antagonist)   | 1, 10         | 6, 18    | Aripiprazole                | 1.00          | 6        | Bosutinib                                                         | 0.01          | 6        |
| Quinpirole (D2R agonist)       | 0.01, 0.1     | 6, 18    | Bas-012416453               | 10.00         | 6        | Buflomedil Hydrochloride                                          | 1.00          | 6        |
| TCB-2 (5HT2A agonist)          | 0.01, 0.1     | 6, 18    | Bay K8644                   | 1.00          | 6        | Bupropion Hydrochloride                                           | 0.30          | 6        |
|                                |               |          | Bergenin                    | 1.00          | 6        | Celastrol                                                         | 10.00         | 6        |
|                                |               |          | Bucladesine                 | 10.00         | 6        | Cetocycline 'A-13428'                                             | 0.30          | 6        |
|                                |               |          | Budesonide                  | 9.20          | 6        | Chenodeoxycholic Acid                                             | 10.00         | 6        |
|                                |               |          | Bumetanide                  | 10.00         | 6        | Chlorpromazine Hydrochloride                                      | 0.03          | 6        |
|                                |               |          | Carbamazole                 | 10.00         | 6        | Clozapine                                                         | 0.10          | 6        |
|                                |               |          | Celastrol                   | 2.50          | 6        | Cm Za 0576                                                        | 1.00          | 6        |
|                                |               |          | Cephaeline                  | 6.00          | 6        | Conesine                                                          | 0.30          | 6        |
|                                |               |          | Chenodeoxycholic Acid       | 10.00         | 6        | Corticosterone                                                    | 0.01          | 6        |
|                                |               |          | Chlorcyclizine              | 1.00          | 6        | Dihydrostilbestrol                                                | 0.00          | 6        |
|                                |               |          | Chlorpromazine              | 0.10          | 6        | Diltiazem Hydrochloride                                           | 0.30          | 6        |
|                                |               |          | Diclofenamide               | 10.00         | 6        | Diphenylaminotriazine                                             | 3.00          | 6        |
|                                |               |          | Diflorasone                 | 8.00          | 6        | Di-Thiorphan                                                      | 0.30          | 6        |
|                                |               |          | Dihydroergocristine         | 1.00          | 6        | Dorzolamide Hydrochloride                                         | 0.10          | 6        |
|                                |               |          | Diltiazem                   | 3.00          | 6        | Eplerenone                                                        | 3.00          | 6        |
|                                |               |          | Diphepanil Metilsulfate     | 10.00         | 6        | Equilenin                                                         | 0.03          | 6        |
|                                |               |          | Di-Thiorphan                | 1.00          | 6        | Estrinol                                                          | 0.03          | 6        |
|                                |               |          | Emetine                     | 7.20          | 6        | Estrone                                                           | 0.03          | 6        |
|                                |               |          | Ethionamide                 | 10.00         | 6        | Ethoxzolamide                                                     | 0.00          | 6        |
|                                |               |          | Fendiline                   | 10.00         | 6        | Etifenin                                                          | 1.00          | 6        |
|                                |               |          | Flecainide                  | 8.40          | 6        | Gabazine                                                          | 1.00          | 6        |
|                                |               |          | Furosemide                  | 10.00         | 6        | Glaxo:Gr247538                                                    | 1.00          | 6        |
|                                |               |          | Haloperidol                 | 0.10          | 6        | Glipizide                                                         | 0.00          | 6        |
|                                |               |          | Hydroquinine                | 1.00          | 6        | Gt-2394 Rac                                                       | 10.00         | 6        |
|                                |               |          | Isoniazid                   | 10.00         | 6        | Harmine Hydrochloride                                             | 0.30          | 6        |
|                                |               |          | Lansoprazole                | 10.00         | 6        | Iloperidone                                                       | 0.01          | 6        |
|                                |               |          | Levothyroxine Sodium        | 1.00          | 6        | Iofetamine Hydrochloride                                          | 10.00         | 6        |
|                                |               |          | Liothyronine                | 3.20          | 6        | Kanpaullone                                                       | 0.10          | 6        |
|                                |               |          | Loxaine                     | 1.00          | 6        | Lamivudine                                                        | 3.00          | 6        |
|                                |               |          | Ly379268                    | 0.10          | 6        | Ly379268                                                          | 0.13          | 6        |
|                                |               |          | Lycorine                    | 10.00         | 6        | Lycorine                                                          | 3.00          | 6        |
|                                |               |          | Mdl100907                   | 0.50          | 6        | Mafenide Hydrochloride                                            | 0.00          | 6        |
|                                |               |          | Mebendazole                 | 10.00         | 6        | Mdl 29951                                                         | 3.00          | 6        |
|                                |               |          | Melatonin                   | 1.00          | 6        | Mdl100907                                                         | 0.67          | 6        |
|                                |               |          | Methylbenzethonium Chloride | 8.60          | 6        | Mebendazole                                                       | 0.30          | 6        |
|                                |               |          | Moxonidine                  | 1.00          | 6        | Memantine Hydrochloride                                           | 0.01          | 6        |
|                                |               |          | Myeloperoxidase Inhibitor-I | 1.10          | 6        | Methylparaben                                                     | 10.00         | 6        |
|                                |               |          | Nadolol                     | 10.00         | 6        | Moclobemide                                                       | 10.00         | 6        |
|                                |               |          | Naringenin                  | 10.00         | 6        | N6-Cyclopentyladenosine                                           | 3.00          | 6        |
|                                |               |          | Nefopam                     | 1.38          | 6        | Naloxone Hydrochloride                                            | 0.00          | 6        |
|                                |               |          | Nicosamide                  | 10.00         | 6        | Naltrexone Hydrochloride                                          | 0.00          | 6        |
|                                |               |          | Niflumic Acid               | 10.00         | 6        | Nefopam                                                           | 0.30          | 6        |
|                                |               |          | Nimodipine                  | 1.00          | 6        | Nicosamide                                                        | 0.03          | 6        |
|                                |               |          | Nordihydroguaiaretic Acid   | 1.00          | 6        | Nimodipine                                                        | 1.34          | 6        |
|                                |               |          | Phenazone                   | 1.00          | 6        | Nogestrel                                                         | 0.01          | 6        |
|                                |               |          | Phenelzine                  | 10.00         | 6        | Norethindrone                                                     | 0.01          | 6        |
|                                |               |          | Phenyl Biguanide            | 10.00         | 6        | Norfloxacin                                                       | 10.00         | 6        |
|                                |               |          | Pizotifen                   | 1.00          | 6        | Perceptin                                                         | 0.30          | 6        |
|                                |               |          | Pk11195                     | 1.00          | 6        | Phenelzine Sulfate                                                | 0.00          | 6        |
|                                |               |          | Prenylamine                 | 9.60          | 6        | Podophyllotoxin                                                   | 0.01          | 6        |
|                                |               |          | Prestwick-675               | 10.00         | 6        | Potassium Estrone Sulfate                                         | 0.03          | 6        |
|                                |               |          | Primidone                   | 10.00         | 6        | Quetiapine                                                        | 0.30          | 6        |
|                                |               |          | Quetiapine                  | 10.00         | 6        | Quinpirole                                                        | 0.13          | 6        |
|                                |               |          | Quinpirole                  | 0.10          | 6        | Quipazine, N-Methyl-, Dimaleate                                   | 0.03          | 6        |
|                                |               |          | Repaglinide                 | 8.80          | 6        | Risperidone                                                       | 0.03          | 6        |
|                                |               |          | Ronidazole                  | 1.00          | 6        | Salsolidin                                                        | 10.00         | 6        |
|                                |               |          | Salsolidin                  | 1.00          | 6        | Sb 43152                                                          | 1.00          | 6        |
|                                |               |          | Sotalol                     | 10.00         | 6        | Sb-242235                                                         | 0.30          | 6        |
|                                |               |          | Spiradoline                 | 0.10          | 6        | Sorafenib                                                         | 0.03          | 6        |
|                                |               |          | Sulconazole                 | 8.60          | 6        | Spirolactone                                                      | 0.10          | 6        |
|                                |               |          | Suloctidil                  | 10.00         | 6        | Suloctidil                                                        | 1.00          | 6        |
|                                |               |          | Tanespimycin                | 1.00          | 6        | Tanespimycin                                                      | 1.34          | 6        |
|                                |               |          | Tcb-2 10 Mm                 | 0.10          | 6        | Tcb-2                                                             | 0.13          | 6        |
|                                |               |          | Trazodone                   | 1.00          | 6        | Tiagabine                                                         | 1.00          | 6        |
|                                |               |          | Trichostatin A              | 0.10          | 6        | Tranlycypromine Hydrochloride                                     | 3.00          | 6        |
|                                |               |          | Trimethadione               | 10.00         | 6        | Trichostatin A                                                    | 0.13          | 6        |
|                                |               |          | Trimethobenzamide           | 1.00          | 6        | Unc0638                                                           | 0.10          | 6        |
|                                |               |          | Tyloxapol                   | 4.00          | 6        | Urapidil, 5-Methyl-                                               | 0.10          | 6        |
|                                |               |          | Vigabatrin                  | 10.00         | 6        | Vandetanib                                                        | 0.30          | 6        |
|                                |               |          | Vorinostat                  | 1.00          | 6        | Vatalanib                                                         | 1.00          | 6        |
|                                |               |          | Zardaverine                 | 10.00         | 6        | Wb-4101 Hydrochloride                                             | 0.00          | 6        |
|                                |               |          | Ziprasidone                 | 0.10          | 6        | Ziprasidone                                                       | 0.03          | 6        |
