# Supplementary material for: Expression-based drug screening of neural progenitor cells from individuals with schizophrenia
Source: PubMed Central journal article supplement (PMC6200740; doi:10.1038/s41467-018-06515-4), 2018-10-24
Supplement: 41467_2018_6515_MOESM2_ESM.pdf [file 41467_2018_6515_MOESM2_ESM.pdf]

## **Description of Additional Supplementary Files**

**File Name:** Supplementary Data 1

**Description:** Differentially expressed genes, SZ-sets and chemogenomic enrichments between hiPSC NPCs and CCLs for each drug.

**File Name:** Supplementary Data 2

**Description:** Summary of drug induced perturbations that normalize post-mortem SZ DE genes.
